# Supplementary material for: Continuous CH 4 and δ 13 CH 4 measurements in London demonstrate under-reported natural gas leakage
Source: Copernicus journal article supplement (doi:10.5194/acp-2021-606), 2021-09-28
Supplement: Supplementary file 1 [file acp-2021-606-supplement.zip]

Archive with 3 entries (3 files):
- GRAVEN_LAB_MEASUREMENTS_FINAL.txt
- ICL_simulations.txt
- Saboya_et_al_21_FINAL_SUPP.pdf
