# Supplementary material for: Continuous CH 4 and δ 13 CH 4 measurements in London demonstrate under-reported natural gas leakage
Source: Copernicus journal article supplement (doi:10.5194/acp-2021-606), 2021-09-28
Supplement: Supplementary file 1 [file acp-2021-606-supplement.zip › GRAVEN_LAB_MEASUREMENTS_FINAL.txt]

# ****************************************************************************************************************
# Number of header lines: 40
#
# Date created:  7 May. 2021
# Contact names: Eric Saboya    (ess17@ic.ac.uk),
#                Heather Graven (h.graven@imperial.ac.uk),
#                Giulia Zazzeri (g.zazzeri@imperial.ac.uk)
#
# ****************************************************************************************************************
# Site: Graven Laboratory, Huxley Building, Imperial College London, South Kensington
# Data range:  2 Mar. 2018 - 31 Oct. 2020
# Description:
#     Measurments of methane (CH4) and 13C/12C (d13CH4) made at Imperial College London by the
#     Graven Laboratory.
#     Measurements made using CRDS Picarro G2201-i isotopic analyser and anchored to the VPDB scale for d13CH4
#     and NBS19/LSVEC scale for CH4 mole fractions.
#     Primary standards were prepared at MPI-BGC. We apply a +0.28 ‰ to correct for the laboratory offset between
#     INSTAAR and MPI_BGC measurements (Umezawa et al., 2017)
#
#     These are the 20-minute averaged data corrected for H2O
#
#     Measurements of wind direction and wind speed are made every five minutes and have been averaged
#     to 20-minute intervals that correspond to the period of each CH4 measurement.
#     Instances when data are not available are indicated by 'nan'
#
#     Full details about the measurements, measurement procedure, and measurement uncertainties
#     can be found in Saboya et al., (2021).
#
#     Please reference Saboya et al., (2021) when using data.
#
# ****************************************************************************************************************
# Column headings
#   0:  Time (year-month-day hour:minute:second)
#   1:  CH4 mole fractions (ppb)
#   2:  CH4 mole fraction standard deviation (ppb)
#   3:  d13ch4 (‰)
#   4:  d13ch4 standard deviation (‰)
#   5:  wind direction (degrees north)
#   6:  wind speed (m/s)
# ****************************************************************************************************************
2018-03-02 19:47:00,2231.5,46.4,-47.77,3.6,88.0,3.4
2018-03-02 20:07:00,2261.6,46.6,-47.13,3.56,88.0,6.1
2018-03-02 20:27:00,2249.6,45.8,-47.85,3.53,110.0,3.4
2018-03-02 20:48:00,2224.5,25.6,-47.9,3.68,44.0,5.8
2018-03-02 21:08:00,2239.9,48.8,-47.78,3.71,66.0,4.4
2018-03-02 21:28:00,2246.4,44.1,-47.87,3.59,44.0,6.1
2018-03-02 21:47:00,2216.5,29.0,-47.61,3.69,110.0,8.2
2018-03-02 22:07:00,2228.2,36.7,-47.89,3.55,88.0,5.4
2018-03-02 22:28:00,2220.4,20.0,-47.88,3.78,88.0,4.1
2018-03-02 22:48:00,2240.0,46.8,-47.23,3.59,88.0,3.4
2018-03-02 23:08:00,2233.3,40.6,-47.35,3.65,132.0,5.1
2018-03-02 23:28:00,2226.4,23.9,-47.26,3.55,132.0,3.7
2018-03-02 23:48:00,2256.9,26.1,-47.68,3.4,88.0,4.1
2018-03-03 00:07:00,2238.7,28.3,-47.15,3.61,88.0,4.4
2018-03-03 00:27:00,2244.5,25.2,-47.45,3.62,44.0,3.7
2018-03-03 00:47:00,2261.5,45.7,-47.21,3.34,110.0,5.1
2018-03-03 01:07:00,2252.2,20.7,-47.21,3.81,132.0,4.8
2018-03-03 01:27:00,2241.2,38.3,-47.45,3.62,88.0,4.8
2018-03-03 01:47:00,2254.0,26.7,-47.5,3.86,44.0,3.1
2018-03-03 02:07:00,2273.8,43.1,-47.22,3.46,66.0,2.0
2018-03-03 02:27:00,2290.0,24.1,-47.17,3.38,88.0,2.7
2018-03-03 02:47:00,2297.5,24.8,-47.33,3.57,88.0,2.4
2018-03-03 03:08:00,2353.0,51.9,-46.6,3.25,44.0,4.4
2018-03-03 03:28:00,2313.6,30.3,-47.3,3.42,44.0,3.7
2018-03-03 03:48:00,2282.6,22.7,-47.36,3.31,88.0,3.7
2018-03-03 04:08:00,2298.0,21.1,-47.76,3.53,88.0,3.1
2018-03-03 04:27:00,2345.0,24.3,-47.8,3.58,88.0,4.1
2018-03-03 04:48:00,2407.8,34.8,-47.27,3.25,44.0,3.1
2018-03-03 05:07:00,2425.0,35.0,-47.41,3.48,88.0,3.1
2018-03-03 05:27:00,2314.5,25.4,-47.54,3.32,44.0,4.8
2018-03-03 05:48:00,2285.6,21.9,-47.52,3.81,0.0,4.1
2018-03-03 06:07:00,2310.9,35.5,-47.51,3.49,88.0,2.4
2018-03-03 06:23:00,2322.6,51.2,-47.27,3.69,88.0,4.1
2018-03-03 08:17:00,2251.4,32.8,-46.19,3.2,44.0,3.4
2018-03-03 08:37:00,2210.8,23.9,-46.73,3.66,88.0,4.4
2018-03-03 08:57:00,2220.0,39.7,-46.73,3.32,66.0,5.8
2018-03-03 09:17:00,2210.5,30.8,-46.93,3.7,88.0,1.7
2018-03-03 09:38:00,2180.4,19.4,-47.26,3.39,88.0,4.8
2018-03-03 09:58:00,2213.8,33.5,-46.48,3.6,132.0,3.1
2018-03-03 10:17:00,2268.2,41.0,-46.4,3.54,44.0,4.8
2018-03-03 10:37:00,2232.1,38.7,-46.28,3.75,88.0,5.1
2018-03-03 10:57:00,2279.3,43.4,-46.32,3.31,44.0,4.1
2018-03-03 11:17:00,2308.5,37.7,-46.03,3.75,44.0,4.4
2018-03-03 11:37:00,2323.0,56.8,-45.79,3.6,66.0,4.1
2018-03-03 11:57:00,2285.5,48.5,-46.03,3.38,88.0,3.7
2018-03-03 12:17:00,2229.8,34.4,-46.29,3.8,88.0,2.7
2018-03-03 12:37:00,2262.1,45.1,-46.27,3.47,66.0,5.4
2018-03-03 12:57:00,2252.9,56.8,-46.02,3.68,88.0,3.1
2018-03-03 13:17:00,2256.6,37.5,-46.18,3.54,44.0,4.4
2018-03-03 13:37:00,2237.3,41.9,-45.75,3.56,44.0,4.4
2018-03-03 13:57:00,2310.0,51.3,-45.8,3.71,88.0,4.4
2018-03-03 14:18:00,2290.1,55.6,-46.09,3.57,44.0,7.5
2018-03-03 14:37:00,2303.6,50.1,-45.97,3.3,88.0,6.1
2018-03-03 14:57:00,2274.0,65.5,-45.95,3.59,44.0,4.1
2018-03-03 15:17:00,2281.5,59.6,-45.9,3.51,88.0,3.4
2018-03-03 15:37:00,2282.7,47.7,-45.64,3.34,132.0,3.4
2018-03-03 15:57:00,2280.2,49.7,-45.88,3.59,0.0,5.8
2018-03-03 16:17:00,2285.9,49.9,-45.89,3.51,88.0,6.5
2018-03-03 16:37:00,2253.0,48.6,-45.64,3.6,88.0,6.5
2018-03-03 16:58:00,2282.8,50.2,-45.72,3.69,88.0,7.5
2018-03-03 17:18:00,2267.2,54.3,-45.54,3.46,132.0,5.1
2018-03-03 17:38:00,2253.1,41.9,-46.08,3.63,88.0,3.4
2018-03-03 17:53:00,2264.9,39.0,-46.04,3.62,44.0,4.8
2018-03-03 19:48:00,2362.2,39.8,-46.37,3.38,88.0,4.8
2018-03-03 20:09:00,2363.6,20.6,-46.35,3.75,88.0,5.4
2018-03-03 20:28:00,2357.7,11.1,-46.18,3.46,132.0,3.7
2018-03-03 20:48:00,2324.5,10.5,-45.99,3.46,66.0,3.7
2018-03-03 21:08:00,2310.0,15.5,-46.31,3.45,132.0,3.4
2018-03-03 21:28:00,2292.6,5.7,-45.81,3.44,44.0,3.7
2018-03-03 21:48:00,2291.9,10.0,-45.91,3.53,88.0,2.4
2018-03-03 22:09:00,2281.4,3.5,-45.63,3.45,110.0,2.7
2018-03-03 22:28:00,2276.0,5.7,-45.75,3.73,44.0,4.1
2018-03-03 22:49:00,2274.8,4.1,-45.43,3.71,88.0,2.0
2018-03-03 23:09:00,2283.2,4.7,-45.68,3.45,88.0,2.4
2018-03-03 23:28:00,2291.7,6.1,-45.87,3.29,88.0,2.4
2018-03-03 23:48:00,2305.3,24.0,-45.23,3.39,176.0,1.7
2018-03-04 00:09:00,2316.1,13.3,-45.76,3.47,22.0,2.0
2018-03-04 00:28:00,2316.3,6.5,-45.55,3.65,88.0,2.0
2018-03-04 00:48:00,2302.0,8.4,-45.22,3.48,132.0,2.0
2018-03-04 01:09:00,2338.1,18.6,-45.88,3.34,88.0,3.1
2018-03-04 01:28:00,2312.9,12.3,-46.05,3.55,132.0,1.7
2018-03-04 01:48:00,2304.0,10.3,-45.43,3.3,132.0,2.7
2018-03-04 02:09:00,2310.8,7.8,-45.62,3.41,88.0,2.7
2018-03-04 02:29:00,2311.3,6.5,-45.67,3.52,22.0,2.4
2018-03-04 02:49:00,2292.3,9.1,-45.73,3.26,88.0,2.0
2018-03-04 03:09:00,2299.4,10.8,-44.99,3.37,220.0,2.0
2018-03-04 03:29:00,2284.9,6.7,-44.67,3.74,88.0,2.4
2018-03-04 03:48:00,2263.6,8.0,-44.93,3.65,132.0,1.0
2018-03-04 04:08:00,2254.1,5.2,-45.01,3.32,88.0,2.4
2018-03-04 04:29:00,2251.4,3.6,-45.16,3.55,44.0,1.7
2018-03-04 04:49:00,2258.2,4.7,-44.71,3.32,132.0,1.4
2018-03-04 05:08:00,2239.5,8.0,-44.48,3.58,66.0,1.0
2018-03-04 05:28:00,2244.6,8.1,-44.41,3.71,88.0,1.7
2018-03-04 05:49:00,2252.7,10.8,-44.52,3.54,88.0,1.0
2018-03-04 06:08:00,2217.9,3.4,-44.58,3.54,44.0,0.7
2018-03-04 06:24:00,2213.7,4.2,-44.55,3.53,44.0,1.4
2018-03-04 08:19:00,2211.1,56.3,-44.12,3.66,154.0,3.7
2018-03-04 08:38:00,2172.8,34.8,-43.8,3.65,132.0,2.0
2018-03-04 08:58:00,2128.3,31.7,-43.8,3.9,132.0,1.7
2018-03-04 09:19:00,2094.5,22.1,-44.32,3.78,176.0,2.7
2018-03-04 09:39:00,2103.2,19.0,-44.28,3.73,176.0,3.1
2018-03-04 09:59:00,2116.1,34.7,-44.4,3.75,132.0,3.1
2018-03-04 10:19:00,2128.8,31.0,-44.74,4.02,132.0,1.7
2018-03-04 10:39:00,2101.9,22.4,-44.49,3.94,176.0,0.7
2018-03-04 10:59:00,2101.1,29.9,-44.63,4.15,176.0,4.4
2018-03-04 11:18:00,2120.9,29.6,-44.3,3.6,132.0,2.7
2018-03-04 11:38:00,2090.1,35.3,-43.97,3.88,176.0,2.4
2018-03-04 11:59:00,2066.4,47.8,-43.79,3.71,132.0,1.7
2018-03-04 12:18:00,2075.2,39.2,-43.53,4.17,132.0,2.4
2018-03-04 12:38:00,2054.5,35.4,-43.91,3.94,176.0,5.1
2018-03-04 12:58:00,2048.0,11.9,-44.3,4.04,132.0,3.1
2018-03-04 13:18:00,2053.0,12.8,-44.44,3.88,176.0,2.7
2018-03-04 13:38:00,2094.2,11.7,-44.6,3.97,220.0,2.7
2018-03-04 13:58:00,2074.2,29.6,-44.27,3.9,132.0,2.7
2018-03-04 14:18:00,2055.2,48.5,-44.21,3.93,88.0,0.3
2018-03-04 14:39:00,2073.5,70.2,-44.17,3.81,176.0,1.7
2018-03-04 14:58:00,2059.2,36.1,-44.08,3.87,198.0,2.0
2018-03-04 15:18:00,2085.1,37.9,-44.29,3.84,88.0,2.4
2018-03-04 15:38:00,2023.1,39.9,-43.92,3.8,44.0,1.4
2018-03-04 15:58:00,2035.3,26.3,-44.25,4.0,88.0,2.0
2018-03-04 16:19:00,2071.6,46.8,-44.55,4.05,176.0,3.1
2018-03-04 16:38:00,2077.0,78.3,-44.26,3.81,132.0,2.0
2018-03-04 16:58:00,2084.4,47.1,-44.22,3.84,308.0,1.4
2018-03-04 17:18:00,2062.1,28.4,-44.58,4.1,88.0,2.0
2018-03-04 17:39:00,2110.5,47.9,-44.3,4.08,176.0,3.1
2018-03-04 17:54:00,2068.8,20.2,-44.54,3.9,44.0,1.4
2018-03-04 19:49:00,2208.6,35.5,-45.13,3.78,88.0,2.0
2018-03-04 20:09:00,2307.3,21.7,-45.13,3.2,264.0,2.0
2018-03-04 20:30:00,2268.2,24.0,-44.97,3.43,176.0,1.0
2018-03-04 20:50:00,2200.1,23.9,-43.99,3.48,132.0,2.4
2018-03-04 21:10:00,2170.8,18.7,-44.09,3.61,132.0,1.7
2018-03-04 21:30:00,2188.3,22.1,-44.13,3.8,132.0,2.4
2018-03-04 21:50:00,2165.3,15.7,-44.37,3.55,176.0,2.7
2018-03-04 22:10:00,2133.0,13.7,-44.28,3.71,132.0,1.4
2018-03-04 22:30:00,2106.5,18.8,-44.32,3.99,264.0,3.1
2018-03-04 22:50:00,2079.7,14.2,-44.31,3.57,264.0,2.7
2018-03-04 23:10:00,2059.4,9.8,-44.77,4.23,220.0,3.7
2018-03-04 23:30:00,2047.9,7.6,-44.73,3.91,176.0,2.4
2018-03-04 23:50:00,2041.7,8.9,-44.63,3.84,264.0,1.0
2018-03-05 00:10:00,2046.7,8.9,-44.93,4.09,176.0,2.0
2018-03-05 00:30:00,2042.5,5.9,-45.08,3.82,176.0,2.0
2018-03-05 00:50:00,2050.4,7.3,-44.94,3.89,176.0,2.7
2018-03-05 01:10:00,2053.9,6.1,-44.71,4.11,220.0,2.7
2018-03-05 01:30:00,2069.5,10.8,-44.83,3.85,264.0,1.0
2018-03-05 01:50:00,2060.2,8.8,-44.94,3.71,242.0,2.0
2018-03-05 02:10:00,2051.8,6.8,-45.1,3.92,286.0,2.7
2018-03-05 02:29:00,2033.3,5.7,-44.61,3.94,220.0,2.4
2018-03-05 02:49:00,2041.5,11.1,-45.06,3.93,264.0,2.4
2018-03-05 03:09:00,2065.8,16.2,-45.11,3.91,176.0,0.0
2018-03-05 03:29:00,2090.6,15.2,-45.27,4.21,220.0,1.0
2018-03-05 03:49:00,2128.6,13.6,-44.82,3.91,44.0,1.7
2018-03-05 04:09:00,2113.6,7.5,-45.16,3.66,132.0,1.4
2018-03-05 04:29:00,2135.0,9.5,-44.95,4.13,220.0,1.4
2018-03-05 04:49:00,2110.6,14.9,-45.03,3.91,220.0,2.4
2018-03-05 05:09:00,2076.9,11.2,-44.83,3.68,44.0,2.0
2018-03-05 05:29:00,2091.5,14.7,-44.95,3.79,220.0,2.4
2018-03-05 05:50:00,2103.4,12.4,-44.86,3.99,176.0,1.7
2018-03-05 06:10:00,2109.3,31.1,-44.88,3.87,176.0,0.7
2018-03-05 06:25:00,2094.1,6.8,-44.78,3.66,132.0,1.4
2018-03-05 08:20:00,2111.2,8.8,-44.97,3.96,132.0,1.0
2018-03-05 08:40:00,2088.1,15.6,-44.21,4.04,132.0,0.7
2018-03-05 09:00:00,2087.7,12.5,-44.44,4.06,88.0,1.0
2018-03-05 09:20:00,2052.3,8.3,-44.42,3.86,220.0,1.0
2018-03-05 09:39:00,2069.0,18.9,-44.21,3.87,88.0,3.1
2018-03-05 09:59:00,2145.2,73.9,-45.07,3.83,88.0,1.0
2018-03-05 10:19:00,2099.8,41.8,-44.82,3.58,154.0,1.4
2018-03-05 10:40:00,2084.0,57.2,-44.55,3.7,176.0,2.7
2018-03-05 11:00:00,2046.1,14.6,-45.25,4.03,132.0,3.1
2018-03-05 11:20:00,2043.0,14.4,-45.3,3.85,132.0,3.7
2018-03-05 11:40:00,2086.5,42.2,-45.28,3.99,110.0,3.4
2018-03-05 11:59:00,2044.9,10.8,-45.46,3.63,176.0,4.1
2018-03-05 12:19:00,2041.3,12.0,-45.05,3.88,88.0,2.0
2018-03-05 12:39:00,2021.7,11.3,-45.45,3.84,132.0,1.7
2018-03-05 12:59:00,2049.8,20.4,-45.24,3.91,0.0,2.0
2018-03-05 13:20:00,2023.7,27.5,-45.1,4.08,88.0,3.1
2018-03-05 13:40:00,2042.6,61.4,-45.44,4.05,132.0,2.7
2018-03-05 13:59:00,1998.2,7.7,-45.56,3.87,132.0,3.7
2018-03-05 14:20:00,1994.0,5.9,-45.46,4.26,88.0,2.7
2018-03-05 14:40:00,2028.3,36.5,-45.21,3.97,88.0,3.1
2018-03-05 14:59:00,2073.9,53.7,-45.2,4.03,44.0,1.4
2018-03-05 15:19:00,2031.9,16.4,-45.67,3.79,88.0,3.7
2018-03-05 15:40:00,2038.9,34.6,-45.47,3.82,88.0,4.1
2018-03-05 15:59:00,2021.6,5.6,-45.63,4.14,88.0,5.4
2018-03-05 16:19:00,2023.3,5.5,-45.86,3.96,132.0,4.1
2018-03-05 16:39:00,2050.7,29.6,-45.34,4.34,132.0,2.4
2018-03-05 16:59:00,2042.0,10.1,-45.27,4.13,132.0,3.1
2018-03-05 17:20:00,2034.6,5.3,-45.63,3.91,110.0,3.7
2018-03-05 17:40:00,2045.9,3.1,-45.47,4.26,88.0,2.7
2018-03-05 17:55:00,2044.7,2.4,-45.19,3.89,88.0,3.4
2018-03-05 19:50:00,2085.0,4.9,-45.19,4.02,176.0,3.4
2018-03-05 20:10:00,2116.6,16.0,-45.03,4.03,198.0,2.0
2018-03-05 20:30:00,2135.1,4.0,-44.45,3.7,88.0,1.7
2018-03-05 20:51:00,2117.9,20.6,-44.72,3.98,132.0,2.4
2018-03-05 21:11:00,2062.8,39.5,-44.34,4.03,44.0,2.0
2018-03-05 21:30:00,2044.8,19.8,-44.58,4.07,88.0,3.1
2018-03-05 21:51:00,2083.8,44.5,-44.28,3.8,88.0,1.4
2018-03-05 22:11:00,2152.0,35.3,-44.09,3.92,132.0,2.4
2018-03-05 22:31:00,2100.2,37.3,-44.84,3.77,132.0,2.7
2018-03-05 22:51:00,2076.6,30.9,-44.67,4.12,264.0,3.7
2018-03-05 23:11:00,2060.2,10.9,-44.73,3.82,132.0,3.1
2018-03-05 23:31:00,2072.8,14.9,-44.53,3.8,176.0,2.7
2018-03-05 23:51:00,2073.6,14.7,-44.43,3.8,176.0,3.4
2018-03-06 00:11:00,2096.7,32.9,-44.35,3.89,176.0,2.7
2018-03-06 00:31:00,2073.7,15.6,-44.44,3.95,330.0,2.0
2018-03-06 00:51:00,2139.5,17.6,-44.68,3.94,264.0,2.0
2018-03-06 01:11:00,2080.9,12.8,-43.91,3.79,176.0,2.0
2018-03-06 01:30:00,2066.8,15.0,-44.03,3.94,132.0,3.1
2018-03-06 01:50:00,2067.7,9.5,-44.27,3.86,308.0,1.7
2018-03-06 02:10:00,2069.6,8.2,-44.19,3.79,264.0,1.0
2018-03-06 02:30:00,2042.3,8.8,-44.36,4.0,308.0,1.7
2018-03-06 02:51:00,2038.9,6.8,-44.74,4.13,132.0,1.7
2018-03-06 03:10:00,2037.0,7.7,-44.67,3.74,176.0,2.7
2018-03-06 03:30:00,2026.3,7.9,-45.02,4.05,220.0,1.0
2018-03-06 03:50:00,2025.4,3.9,-45.09,4.12,308.0,2.4
2018-03-06 04:11:00,2023.4,6.0,-44.96,4.02,220.0,4.1
2018-03-06 04:31:00,2023.5,7.7,-45.06,4.17,242.0,3.4
2018-03-06 04:51:00,2033.8,8.7,-45.18,4.04,132.0,1.4
2018-03-06 05:10:00,2035.3,7.6,-44.93,4.13,264.0,2.4
2018-03-06 05:30:00,2039.9,5.7,-45.48,4.04,330.0,1.7
2018-03-06 05:50:00,2037.1,6.7,-45.43,3.95,308.0,4.1
2018-03-06 06:10:00,2053.2,9.8,-45.47,3.98,220.0,2.0
2018-03-06 06:26:00,2061.0,7.8,-45.5,3.62,132.0,1.0
2018-03-06 08:20:00,2063.0,8.4,-45.64,3.79,220.0,2.0
2018-03-06 08:40:00,2052.9,7.8,-45.55,3.87,220.0,2.4
2018-03-06 09:00:00,2047.7,6.1,-45.41,4.51,220.0,0.7
2018-03-06 09:21:00,2058.9,11.1,-45.53,3.72,220.0,2.7
2018-03-06 09:40:00,2048.7,9.7,-45.41,4.04,264.0,2.0
2018-03-06 10:00:00,2048.5,10.1,-44.85,3.9,220.0,2.0
2018-03-06 10:21:00,2044.5,9.8,-45.68,3.98,286.0,2.0
2018-03-06 10:41:00,2046.2,10.0,-45.42,3.69,176.0,2.4
2018-03-06 11:01:00,2039.4,13.0,-45.5,3.84,220.0,3.4
2018-03-06 11:20:00,2029.8,5.9,-45.76,3.87,264.0,1.4
2018-03-06 11:40:00,2027.7,6.7,-45.85,3.77,0.0,2.7
2018-03-06 12:00:00,2045.2,7.3,-45.97,3.82,308.0,2.0
2018-03-06 12:20:00,2037.3,7.6,-46.29,4.29,308.0,0.7
2018-03-06 12:40:00,2038.9,6.1,-46.01,3.93,308.0,2.4
2018-03-06 13:00:00,2038.9,7.8,-46.27,4.02,132.0,1.7
2018-03-06 13:20:00,2055.3,5.2,-45.87,4.03,0.0,3.4
2018-03-06 13:40:00,2049.3,8.3,-45.84,4.09,220.0,1.7
2018-03-06 14:01:00,2058.7,12.4,-45.75,3.91,220.0,0.7
2018-03-06 14:21:00,2057.9,7.5,-45.83,4.01,220.0,2.0
2018-03-06 14:40:00,2051.8,7.2,-46.14,4.27,132.0,1.4
2018-03-06 15:00:00,2065.1,12.8,-45.86,3.95,308.0,1.0
2018-03-06 15:20:00,2067.2,17.4,-45.64,3.87,308.0,2.0
2018-03-06 15:40:00,2066.4,9.8,-45.74,4.09,44.0,2.0
2018-03-06 16:00:00,2060.8,7.9,-45.79,3.84,132.0,1.4
2018-03-06 16:21:00,2070.6,10.8,-45.58,3.83,132.0,1.7
2018-03-06 16:40:00,2080.8,11.3,-45.49,3.92,220.0,2.0
2018-03-06 17:00:00,2074.4,11.9,-46.22,3.94,264.0,1.0
2018-03-06 17:21:00,2078.6,12.2,-46.27,4.04,176.0,1.4
2018-03-06 17:40:00,2116.8,16.7,-45.98,3.68,44.0,1.4
2018-03-06 17:56:00,2139.5,7.2,-46.21,3.79,176.0,1.7
2018-03-06 19:51:00,2179.1,11.8,-45.92,3.93,132.0,1.7
2018-03-06 20:11:00,2197.6,17.7,-45.48,3.74,220.0,1.7
2018-03-06 20:32:00,2284.9,36.3,-46.4,3.54,88.0,0.3
2018-03-06 20:52:00,2312.2,15.7,-45.94,3.7,132.0,0.7
2018-03-06 21:12:00,2451.8,54.7,-46.34,3.31,88.0,0.0
2018-03-06 21:32:00,2355.7,23.3,-46.55,3.54,220.0,1.0
2018-03-06 21:52:00,2281.1,14.8,-46.3,3.6,44.0,0.7
2018-03-06 22:12:00,2316.6,36.1,-46.3,3.63,308.0,0.7
2018-03-06 22:32:00,2364.8,14.8,-46.28,3.42,220.0,0.0
2018-03-06 22:51:00,2441.8,29.8,-46.04,3.43,220.0,1.0
2018-03-06 23:11:00,2529.9,28.6,-45.45,3.21,220.0,0.7
2018-03-06 23:32:00,2517.1,36.4,-45.91,2.94,264.0,0.3
2018-03-06 23:51:00,2481.4,50.9,-45.89,3.15,264.0,1.0
2018-03-07 00:11:00,2372.0,20.3,-45.83,3.18,308.0,1.0
2018-03-07 00:31:00,2456.7,50.2,-45.42,3.41,308.0,1.4
2018-03-07 00:51:00,2475.4,31.7,-44.88,3.5,0.0,1.0
2018-03-07 01:11:00,2412.6,8.1,-44.75,3.21,308.0,1.0
2018-03-07 01:31:00,2404.5,14.7,-45.06,3.4,264.0,0.3
2018-03-07 01:51:00,2595.6,75.2,-44.77,3.2,88.0,1.0
2018-03-07 02:11:00,2597.0,16.1,-44.94,3.16,220.0,0.3
2018-03-07 02:31:00,2669.4,19.9,-44.77,3.07,220.0,0.3
2018-03-07 02:51:00,2680.3,22.0,-44.77,2.92,308.0,0.7
2018-03-07 03:12:00,2625.2,40.7,-44.47,3.1,308.0,1.0
2018-03-07 03:32:00,2652.1,47.8,-44.11,2.96,308.0,0.7
2018-03-07 03:51:00,2741.2,18.7,-43.77,3.02,308.0,0.3
2018-03-07 04:11:00,2849.2,63.7,-43.37,2.98,308.0,1.0
2018-03-07 04:31:00,2875.1,44.6,-43.82,2.84,308.0,1.0
2018-03-07 04:51:00,2712.0,53.7,-44.15,3.08,286.0,1.4
2018-03-07 05:11:00,2511.3,45.5,-44.86,3.39,0.0,1.7
2018-03-07 05:31:00,2331.4,43.3,-45.29,3.32,308.0,1.7
2018-03-07 05:52:00,2302.2,13.5,-45.04,3.4,286.0,1.7
2018-03-07 06:12:00,2287.4,12.6,-45.22,3.61,308.0,1.7
2018-03-07 06:27:00,2224.9,18.2,-46.12,3.47,308.0,3.7
2018-03-07 08:21:00,2084.1,8.6,-45.45,3.84,0.0,1.7
2018-03-07 08:41:00,2111.7,12.9,-45.47,3.82,308.0,2.0
2018-03-07 09:01:00,2108.1,15.5,-44.89,3.73,264.0,1.7
2018-03-07 09:21:00,2106.6,21.9,-45.22,4.02,308.0,0.7
2018-03-07 09:41:00,2130.8,13.6,-44.9,3.57,264.0,1.7
2018-03-07 10:01:00,2135.2,3.0,-45.27,3.75,308.0,0.7
2018-03-07 10:21:00,2132.4,7.3,-45.26,3.81,220.0,1.4
2018-03-07 10:41:00,2140.1,18.9,-44.33,3.5,308.0,2.0
2018-03-07 11:01:00,2090.0,23.8,-44.98,3.87,308.0,1.4
2018-03-07 11:21:00,2073.5,5.0,-45.86,3.96,220.0,3.4
2018-03-07 11:41:00,2094.5,15.3,-45.63,3.81,220.0,2.4
2018-03-07 12:02:00,2121.9,7.5,-45.45,3.56,220.0,2.4
2018-03-07 12:22:00,2107.1,11.7,-45.59,3.83,220.0,3.4
2018-03-07 12:42:00,2114.1,14.1,-45.53,4.18,264.0,3.1
2018-03-07 13:02:00,2116.2,10.3,-45.62,3.9,264.0,2.0
2018-03-07 13:22:00,2098.9,9.7,-45.55,3.83,220.0,2.4
2018-03-07 13:41:00,2082.6,5.6,-45.94,3.92,308.0,2.0
2018-03-07 14:01:00,2077.3,10.1,-45.65,3.92,264.0,5.4
2018-03-07 14:22:00,2068.0,6.7,-45.59,3.87,264.0,4.4
2018-03-07 14:42:00,2074.7,7.2,-46.44,3.83,264.0,3.4
2018-03-07 15:02:00,2071.3,16.6,-45.82,3.75,308.0,1.0
2018-03-07 15:22:00,2020.1,10.0,-46.25,4.12,308.0,4.1
2018-03-07 15:42:00,1998.5,6.1,-46.21,3.73,308.0,4.8
2018-03-07 16:01:00,1990.9,9.9,-46.15,4.03,286.0,2.0
2018-03-07 16:22:00,1996.5,6.0,-46.23,3.78,220.0,2.7
2018-03-07 16:41:00,1999.1,5.0,-46.3,4.2,220.0,2.4
2018-03-07 17:02:00,1991.1,8.6,-46.16,3.85,132.0,3.1
2018-03-07 17:22:00,1990.1,5.8,-46.45,3.97,220.0,3.1
2018-03-07 17:41:00,1991.6,5.2,-46.48,3.88,198.0,3.7
2018-03-07 17:57:00,1996.8,6.4,-46.14,4.2,242.0,3.4
2018-03-07 19:52:00,2053.5,19.6,-45.71,3.75,220.0,1.7
2018-03-07 20:12:00,2078.1,12.9,-45.51,3.72,220.0,1.4
2018-03-07 20:33:00,2069.5,8.6,-45.42,4.04,308.0,0.7
2018-03-07 20:53:00,2074.7,9.7,-45.69,4.26,286.0,2.0
2018-03-07 21:12:00,2073.1,6.2,-45.1,4.02,198.0,2.0
2018-03-07 21:33:00,2057.7,9.8,-45.89,3.88,264.0,1.7
2018-03-07 21:53:00,2039.0,9.1,-45.04,3.78,220.0,1.4
2018-03-07 22:12:00,2039.7,8.7,-45.24,4.25,176.0,1.4
2018-03-07 22:32:00,2060.1,6.0,-45.35,3.9,44.0,0.7
2018-03-07 22:52:00,2044.7,9.5,-44.95,3.96,220.0,1.4
2018-03-07 23:12:00,2043.8,14.2,-45.35,4.05,176.0,2.7
2018-03-07 23:32:00,2071.1,8.7,-45.2,3.79,220.0,1.0
2018-03-07 23:52:00,2092.7,13.1,-45.46,3.6,110.0,1.7
2018-03-08 00:12:00,2102.2,17.4,-45.35,3.88,176.0,1.4
2018-03-08 00:33:00,2048.5,15.8,-45.65,3.84,0.0,1.7
2018-03-08 00:53:00,2024.3,8.4,-45.44,3.88,176.0,2.7
2018-03-08 01:13:00,2028.3,10.9,-45.51,4.08,154.0,1.0
2018-03-08 01:33:00,2056.2,14.1,-44.95,3.89,154.0,1.0
2018-03-08 01:53:00,2049.6,12.1,-44.95,3.78,176.0,1.7
2018-03-08 02:13:00,2050.2,9.8,-45.07,3.83,132.0,2.7
2018-03-08 02:32:00,2059.5,10.5,-44.66,3.85,220.0,2.4
2018-03-08 02:52:00,2026.1,11.0,-44.75,4.14,132.0,1.7
2018-03-08 03:12:00,2032.0,10.6,-45.0,4.06,176.0,1.4
2018-03-08 03:33:00,2042.9,8.5,-44.36,4.13,176.0,2.7
2018-03-08 03:53:00,2018.8,9.3,-44.77,4.13,176.0,2.0
2018-03-08 04:13:00,2046.8,18.8,-44.72,3.92,220.0,3.4
2018-03-08 04:33:00,2114.8,20.0,-45.19,3.87,176.0,4.1
2018-03-08 04:53:00,2056.7,22.8,-44.69,4.0,220.0,3.1
2018-03-08 05:13:00,2008.3,9.3,-44.96,3.88,264.0,4.4
2018-03-08 05:33:00,1990.4,5.7,-44.36,4.06,176.0,2.4
2018-03-08 05:53:00,1986.6,5.9,-44.5,4.2,176.0,2.7
2018-03-08 06:12:00,1974.9,4.4,-44.41,4.31,264.0,5.4
2018-03-08 06:28:00,1978.7,4.8,-45.03,4.04,220.0,3.1
2018-03-08 08:23:00,1980.7,5.6,-45.53,3.89,264.0,5.8
2018-03-08 08:43:00,1978.2,4.6,-45.47,4.11,264.0,2.7
2018-03-08 09:03:00,1972.6,6.1,-45.97,4.16,264.0,7.1
2018-03-08 09:22:00,1971.8,3.5,-46.0,4.08,220.0,5.4
2018-03-08 09:43:00,1972.1,5.7,-45.28,4.29,220.0,6.5
2018-03-08 10:02:00,1969.7,4.4,-45.62,4.12,220.0,5.4
2018-03-08 10:22:00,1972.3,6.2,-45.47,4.13,220.0,6.5
2018-03-08 10:42:00,1972.3,5.9,-45.77,3.91,220.0,4.4
2018-03-08 11:03:00,1974.0,4.8,-45.93,3.97,264.0,5.4
2018-03-08 11:22:00,1974.1,5.7,-45.9,4.43,264.0,5.1
2018-03-08 11:43:00,1974.0,4.5,-46.4,4.15,44.0,6.5
2018-03-08 12:03:00,1974.4,5.5,-46.41,4.08,220.0,3.7
2018-03-08 12:23:00,1974.4,4.6,-46.23,4.3,264.0,7.5
2018-03-08 12:43:00,1981.3,6.1,-46.14,4.15,0.0,7.1
2018-03-08 13:03:00,1980.7,7.4,-46.74,4.16,264.0,4.8
2018-03-08 13:23:00,1978.1,8.7,-46.0,4.17,220.0,2.4
2018-03-08 13:42:00,1970.9,6.3,-45.99,4.04,220.0,6.1
2018-03-08 14:02:00,1971.3,6.1,-46.34,4.11,286.0,6.1
2018-03-08 14:22:00,1973.8,3.6,-46.47,4.12,242.0,5.8
2018-03-08 14:42:00,1977.6,4.5,-47.05,3.9,308.0,5.1
2018-03-08 15:02:00,1976.5,2.8,-46.7,4.06,264.0,7.8
2018-03-08 15:22:00,1972.0,4.1,-46.77,4.03,308.0,5.1
2018-03-08 15:43:00,1979.7,2.8,-46.43,3.92,308.0,4.8
2018-03-08 16:02:00,1972.8,10.4,-46.06,3.77,264.0,7.1
2018-03-08 16:22:00,1971.4,5.1,-46.84,4.12,264.0,3.7
2018-03-08 16:42:00,1976.0,4.4,-46.93,4.13,220.0,3.7
2018-03-08 17:02:00,1973.9,3.7,-46.78,4.29,286.0,4.1
2018-03-08 17:23:00,1981.0,3.3,-46.97,3.98,308.0,2.4
2018-03-08 17:43:00,1981.0,4.2,-46.69,4.09,264.0,4.4
2018-03-08 17:58:00,1996.0,5.9,-46.85,4.57,264.0,1.4
2018-03-08 19:54:00,2027.7,11.6,-46.16,3.92,220.0,3.7
2018-03-08 20:14:00,2014.2,6.1,-45.47,4.09,264.0,3.4
2018-03-08 20:34:00,2007.4,4.6,-45.8,4.1,220.0,3.7
2018-03-08 20:54:00,2010.7,4.2,-45.37,4.02,132.0,3.1
2018-03-08 21:13:00,2012.8,5.9,-45.88,3.96,176.0,1.4
2018-03-08 21:33:00,2019.8,6.3,-45.79,3.93,220.0,2.4
2018-03-08 21:54:00,2014.2,5.1,-45.48,3.93,220.0,2.4
2018-03-08 22:14:00,2014.6,7.1,-45.51,4.18,308.0,1.4
2018-03-08 22:33:00,2015.2,8.5,-45.79,4.02,264.0,2.4
2018-03-08 22:53:00,2028.3,7.0,-45.55,4.18,308.0,2.4
2018-03-08 23:14:00,2021.4,5.8,-45.81,4.14,220.0,1.0
2018-03-08 23:34:00,2015.4,7.6,-45.64,4.13,44.0,2.4
2018-03-08 23:54:00,2020.4,4.9,-45.79,3.97,264.0,2.0
2018-03-09 00:13:00,2034.8,7.0,-46.06,4.0,220.0,2.0
2018-03-09 00:33:00,2032.9,9.8,-46.12,3.79,264.0,1.7
2018-03-09 00:54:00,2040.3,5.5,-45.62,3.77,132.0,2.4
2018-03-09 01:13:00,2036.2,8.8,-45.78,4.19,264.0,1.7
2018-03-09 01:33:00,2042.2,8.4,-45.58,3.67,220.0,2.4
2018-03-09 01:54:00,2065.9,9.6,-45.78,3.87,220.0,2.7
2018-03-09 02:14:00,2081.3,7.2,-45.92,3.74,220.0,0.7
2018-03-09 02:33:00,2091.7,11.2,-45.59,3.65,0.0,1.0
2018-03-09 02:53:00,2069.1,13.5,-45.87,3.91,264.0,1.4
2018-03-09 03:14:00,2073.0,8.4,-45.65,3.66,88.0,0.7
2018-03-09 03:34:00,2086.4,13.7,-46.08,3.82,88.0,1.0
2018-03-09 03:53:00,2106.6,24.2,-45.7,4.01,44.0,0.3
2018-03-09 04:14:00,2126.3,12.5,-45.8,3.81,88.0,0.0
2018-03-09 04:34:00,2192.0,34.5,-45.23,3.72,132.0,0.0
2018-03-09 04:54:00,2225.5,13.4,-44.97,3.89,44.0,0.3
2018-03-09 05:14:00,2250.0,16.7,-44.79,3.42,132.0,0.3
2018-03-09 05:33:00,2237.4,15.4,-45.11,3.55,176.0,0.0
2018-03-09 05:53:00,2213.8,20.8,-45.2,3.48,176.0,0.7
2018-03-09 06:14:00,2291.1,29.9,-45.25,3.48,154.0,0.3
2018-03-09 06:29:00,2316.7,12.6,-45.32,3.21,264.0,0.0
2018-03-09 08:23:00,2301.7,50.1,-44.74,3.46,132.0,0.3
2018-03-09 08:43:00,2238.4,36.6,-45.07,3.85,176.0,0.7
2018-03-09 09:03:00,2151.1,37.7,-44.6,3.59,132.0,0.7
2018-03-09 09:23:00,2183.3,43.6,-44.54,3.78,132.0,0.3
2018-03-09 09:44:00,2218.6,79.9,-44.56,3.75,88.0,1.0
2018-03-09 10:04:00,2218.8,76.4,-44.25,3.52,88.0,0.7
2018-03-09 10:24:00,2064.1,15.1,-45.37,3.95,88.0,2.4
2018-03-09 10:43:00,2017.9,13.4,-45.24,4.05,66.0,2.7
2018-03-09 11:04:00,2017.3,41.3,-45.98,4.03,88.0,2.0
2018-03-09 11:24:00,2033.4,59.2,-44.95,4.07,88.0,3.4
2018-03-09 11:43:00,2001.7,10.8,-45.68,4.12,88.0,3.1
2018-03-09 12:03:00,2008.2,46.1,-45.54,4.35,88.0,2.4
2018-03-09 12:24:00,2019.1,18.5,-45.16,4.09,44.0,2.7
2018-03-09 12:44:00,2001.3,8.2,-45.95,4.21,132.0,3.7
2018-03-09 13:04:00,2008.1,9.4,-45.94,4.31,88.0,2.0
2018-03-09 13:24:00,2026.0,32.7,-45.24,3.83,88.0,3.1
2018-03-09 13:43:00,1999.7,4.2,-45.39,4.16,88.0,2.7
2018-03-09 14:03:00,2000.4,4.7,-45.44,4.03,88.0,2.4
2018-03-09 14:23:00,2080.6,45.1,-44.83,4.04,88.0,1.7
2018-03-09 14:43:00,2038.6,35.2,-44.9,4.25,88.0,2.4
2018-03-09 15:03:00,2062.0,43.4,-44.77,4.04,88.0,1.7
2018-03-09 15:24:00,2064.6,64.7,-44.67,4.06,132.0,0.7
2018-03-09 15:44:00,2023.9,11.6,-44.57,4.01,176.0,1.4
2018-03-09 16:03:00,2031.7,12.2,-44.4,4.13,22.0,1.4
2018-03-09 16:24:00,2023.9,6.4,-44.47,4.13,88.0,3.4
2018-03-09 16:44:00,2040.2,3.9,-44.09,4.23,88.0,4.1
2018-03-09 17:03:00,2043.6,4.6,-44.53,4.26,88.0,2.7
2018-03-09 17:23:00,2062.6,8.1,-43.76,4.13,132.0,2.0
2018-03-09 17:43:00,2069.4,4.4,-43.95,3.94,44.0,2.4
2018-03-09 17:59:00,2077.4,4.8,-44.06,3.94,132.0,2.0
2018-03-09 19:55:00,2107.5,6.1,-43.87,3.79,154.0,2.7
2018-03-09 20:15:00,2124.6,6.8,-43.55,4.11,110.0,2.4
2018-03-09 20:35:00,2134.7,3.7,-43.27,3.63,88.0,3.1
2018-03-09 20:54:00,2130.6,3.6,-43.27,3.94,88.0,2.7
2018-03-09 21:14:00,2130.2,2.0,-43.22,3.82,44.0,2.4
2018-03-09 21:35:00,2156.1,37.8,-42.85,3.86,88.0,1.0
2018-03-09 21:55:00,2194.9,46.3,-42.52,3.43,132.0,2.0
2018-03-09 22:14:00,2150.2,12.1,-43.19,3.62,132.0,2.4
2018-03-09 22:34:00,2101.3,20.6,-42.95,3.8,220.0,3.1
2018-03-09 22:55:00,2092.3,9.6,-42.73,3.87,176.0,4.1
2018-03-09 23:15:00,2092.6,5.2,-42.58,3.8,176.0,2.7
2018-03-09 23:34:00,2092.0,7.9,-42.51,3.72,176.0,2.4
2018-03-09 23:54:00,2089.0,10.9,-42.85,3.66,198.0,3.7
2018-03-10 00:15:00,2110.6,8.7,-42.27,3.87,220.0,2.4
2018-03-10 00:35:00,2115.2,9.6,-42.52,3.72,264.0,2.0
2018-03-10 00:55:00,2092.8,10.5,-42.95,4.18,220.0,1.7
2018-03-10 01:14:00,2099.2,6.5,-42.74,3.9,132.0,1.7
2018-03-10 01:34:00,2101.0,7.5,-43.13,3.82,132.0,2.4
2018-03-10 01:55:00,2106.7,11.1,-42.99,3.95,132.0,2.0
2018-03-10 02:15:00,2105.7,21.4,-42.76,3.7,220.0,0.3
2018-03-10 02:35:00,2123.6,12.8,-43.16,3.8,220.0,1.4
2018-03-10 02:55:00,2132.8,13.0,-42.53,3.76,154.0,1.7
2018-03-10 03:15:00,2110.7,12.1,-43.21,3.68,88.0,1.7
2018-03-10 03:34:00,2123.3,9.6,-43.2,3.91,0.0,1.4
2018-03-10 03:54:00,2110.5,10.8,-42.92,3.7,132.0,1.7
2018-03-10 04:14:00,2115.9,13.0,-43.17,3.85,220.0,1.0
2018-03-10 04:35:00,2115.9,19.5,-43.65,3.91,176.0,2.7
2018-03-10 04:54:00,2081.1,8.2,-43.66,3.88,286.0,2.4
2018-03-10 05:14:00,2073.8,11.0,-43.27,4.1,88.0,2.7
2018-03-10 05:35:00,2072.9,12.7,-43.53,3.96,220.0,2.7
2018-03-10 05:54:00,2095.0,12.4,-43.6,3.85,198.0,2.4
2018-03-10 06:14:00,2096.2,7.6,-43.76,4.14,264.0,1.7
2018-03-10 06:30:00,2098.0,4.6,-43.21,3.62,176.0,2.0
2018-03-10 08:25:00,2069.3,8.3,-43.83,3.99,154.0,1.0
2018-03-10 08:45:00,2068.7,9.3,-44.03,4.01,176.0,2.7
2018-03-10 09:04:00,2068.1,7.3,-44.04,3.85,220.0,1.7
2018-03-10 09:25:00,2071.6,6.8,-43.47,4.07,176.0,2.7
2018-03-10 09:44:00,2064.7,19.0,-43.69,4.17,220.0,3.4
2018-03-10 10:04:00,2031.2,5.4,-43.24,3.93,220.0,5.1
2018-03-10 10:25:00,2032.6,6.7,-43.52,3.75,286.0,2.4
2018-03-10 10:44:00,2039.7,7.1,-43.63,4.09,132.0,2.7
2018-03-10 11:04:00,2042.5,7.7,-44.01,3.99,176.0,2.0
2018-03-10 11:24:00,2049.8,5.2,-44.14,3.93,308.0,1.4
2018-03-10 11:45:00,2050.9,8.8,-44.18,3.99,176.0,0.7
2018-03-10 12:05:00,2060.0,6.3,-43.71,3.94,132.0,3.4
2018-03-10 12:25:00,2059.8,11.6,-44.04,3.94,132.0,1.0
2018-03-10 12:45:00,2049.7,12.1,-43.98,4.18,176.0,3.4
2018-03-10 13:05:00,2039.1,10.2,-44.65,4.3,176.0,1.0
2018-03-10 13:25:00,2050.5,13.6,-44.09,4.07,132.0,3.1
2018-03-10 13:45:00,2047.0,9.9,-44.29,4.02,220.0,3.1
2018-03-10 14:04:00,2039.0,9.2,-44.21,4.0,220.0,3.1
2018-03-10 14:25:00,2034.8,10.9,-44.28,4.06,88.0,3.1
2018-03-10 14:45:00,2021.2,10.4,-44.42,4.04,220.0,2.0
2018-03-10 15:04:00,2026.0,11.2,-44.09,4.04,220.0,3.1
2018-03-10 15:24:00,2011.6,5.4,-44.51,4.13,264.0,3.1
2018-03-10 15:44:00,2015.1,8.4,-44.66,4.11,308.0,3.1
2018-03-10 16:04:00,2010.2,10.6,-44.24,4.2,176.0,1.7
2018-03-10 16:24:00,1997.5,5.9,-44.13,3.99,264.0,3.1
2018-03-10 16:45:00,1977.1,4.3,-44.38,3.84,264.0,4.4
2018-03-10 17:05:00,1978.7,6.3,-45.0,3.8,132.0,2.4
2018-03-10 17:24:00,1978.5,5.6,-44.65,4.04,198.0,5.4
2018-03-10 17:44:00,1974.5,6.3,-44.91,4.11,220.0,2.7
2018-03-10 18:00:00,1981.8,7.0,-45.06,4.32,264.0,1.0
2018-03-10 19:56:00,2042.3,17.1,-45.35,3.78,220.0,3.4
2018-03-10 20:16:00,2046.6,17.9,-45.17,4.24,242.0,1.7
2018-03-10 20:35:00,2037.8,9.2,-45.16,4.05,264.0,3.1
2018-03-10 20:56:00,2039.7,9.9,-45.06,3.86,308.0,1.0
2018-03-10 21:16:00,2052.2,7.8,-45.0,3.85,176.0,0.7
2018-03-10 21:36:00,2055.2,10.6,-45.01,4.42,264.0,2.4
2018-03-10 21:56:00,2042.5,14.3,-44.77,4.1,264.0,1.7
2018-03-10 22:16:00,2086.4,14.2,-45.05,3.65,132.0,0.3
2018-03-10 22:35:00,2072.0,20.3,-44.44,4.08,176.0,1.0
2018-03-10 22:55:00,2113.3,13.1,-44.81,3.72,176.0,1.4
2018-03-10 23:16:00,2132.4,12.9,-44.74,3.69,0.0,0.0
2018-03-10 23:35:00,2106.5,33.4,-44.73,4.22,264.0,0.3
2018-03-10 23:55:00,2125.7,41.4,-44.8,3.62,308.0,0.3
2018-03-11 00:15:00,2133.5,34.3,-45.23,3.86,264.0,0.3
2018-03-11 00:35:00,2085.8,16.5,-45.15,3.8,88.0,0.7
2018-03-11 00:55:00,2096.5,20.8,-44.62,3.74,44.0,0.3
2018-03-11 01:16:00,2165.1,29.2,-44.31,3.5,308.0,0.7
2018-03-11 01:35:00,2171.1,58.2,-44.15,3.63,110.0,1.7
2018-03-11 01:55:00,2425.7,18.9,-43.99,3.35,88.0,1.7
2018-03-11 02:15:00,2347.2,32.2,-43.98,3.54,88.0,1.7
2018-03-11 02:35:00,2308.6,15.1,-44.16,3.67,110.0,2.0
2018-03-11 02:56:00,2244.7,16.7,-44.17,3.71,132.0,1.7
2018-03-11 03:16:00,2224.0,23.8,-44.27,3.86,132.0,1.7
2018-03-11 03:35:00,2194.0,19.8,-44.56,3.82,88.0,2.0
2018-03-11 03:55:00,2161.1,15.9,-44.49,3.82,88.0,1.4
2018-03-11 04:15:00,2158.8,34.5,-44.56,3.77,44.0,2.0
2018-03-11 04:35:00,2157.2,25.2,-44.39,3.63,132.0,1.7
2018-03-11 04:55:00,2187.8,39.1,-44.81,3.8,154.0,0.7
2018-03-11 05:16:00,2192.8,20.2,-44.99,3.63,132.0,1.7
2018-03-11 05:36:00,2552.4,187.9,-45.17,3.2,0.0,1.4
2018-03-11 05:55:00,2541.8,73.2,-45.13,3.3,0.0,0.3
2018-03-11 06:15:00,2418.8,28.2,-45.28,3.28,88.0,1.4
2018-03-11 06:31:00,2441.1,29.9,-44.98,3.18,88.0,1.0
2018-03-11 08:26:00,2285.2,10.4,-45.39,3.43,88.0,1.4
2018-03-11 08:45:00,2304.8,18.6,-45.02,3.92,88.0,2.0
2018-03-11 09:05:00,2319.2,16.8,-45.52,3.56,132.0,2.7
2018-03-11 09:25:00,2332.7,25.1,-45.82,3.59,88.0,3.4
2018-03-11 09:45:00,2289.2,41.9,-46.08,3.46,88.0,2.0
2018-03-11 10:05:00,2148.3,18.1,-46.06,3.96,132.0,2.4
2018-03-11 10:26:00,2042.1,40.1,-45.33,3.92,88.0,4.8
2018-03-11 10:46:00,2054.1,29.6,-44.9,4.01,44.0,5.1
2018-03-11 11:05:00,2037.0,17.3,-45.13,3.91,44.0,2.4
2018-03-11 11:25:00,2043.0,48.9,-44.78,4.27,88.0,1.7
2018-03-11 11:45:00,2062.2,44.1,-44.84,4.01,132.0,1.0
2018-03-11 12:05:00,2030.8,39.8,-45.15,4.39,66.0,6.1
2018-03-11 12:26:00,2117.2,58.7,-45.32,3.74,88.0,3.7
2018-03-11 12:46:00,2109.2,44.5,-45.2,4.06,132.0,3.4
2018-03-11 13:05:00,2098.1,22.2,-45.68,3.73,44.0,4.1
2018-03-11 13:26:00,2160.7,92.9,-45.01,3.85,88.0,4.4
2018-03-11 13:46:00,2154.8,37.1,-45.66,3.65,44.0,4.8
2018-03-11 14:06:00,2112.2,84.4,-45.03,3.83,132.0,3.4
2018-03-11 14:25:00,2124.6,71.1,-45.33,3.53,66.0,4.4
2018-03-11 14:45:00,2086.4,36.4,-45.44,3.84,132.0,2.0
2018-03-11 15:05:00,2126.5,36.6,-45.22,3.84,88.0,4.1
2018-03-11 15:26:00,2112.2,34.6,-45.57,3.97,44.0,1.4
2018-03-11 15:45:00,2192.4,49.1,-45.2,3.9,88.0,3.1
2018-03-11 16:05:00,2158.7,58.0,-44.95,3.72,88.0,1.7
2018-03-11 16:26:00,2144.7,34.6,-45.07,3.94,44.0,2.7
2018-03-11 16:45:00,2165.5,55.2,-44.94,3.55,22.0,2.0
2018-03-11 17:05:00,2112.4,27.5,-45.13,3.69,44.0,3.7
2018-03-11 17:25:00,2150.2,45.7,-45.08,3.63,44.0,2.7
2018-03-11 17:46:00,2185.6,56.7,-44.99,3.56,88.0,3.4
2018-03-11 18:01:00,2135.1,18.7,-45.28,3.96,88.0,3.7
2018-03-11 19:57:00,2091.0,14.5,-45.03,3.94,88.0,2.4
2018-03-11 20:17:00,2108.7,23.3,-45.21,3.88,88.0,1.7
2018-03-11 20:36:00,2136.0,24.7,-45.22,4.01,110.0,2.4
2018-03-11 20:56:00,2190.8,17.5,-45.44,3.95,44.0,2.4
2018-03-11 21:16:00,2196.6,9.4,-45.75,3.63,44.0,4.4
2018-03-11 21:36:00,2158.8,10.8,-45.27,3.88,88.0,2.0
2018-03-11 21:57:00,2167.0,14.9,-45.38,3.54,66.0,2.0
2018-03-11 22:17:00,2149.2,15.3,-45.76,3.78,88.0,2.4
2018-03-11 22:37:00,2126.4,3.4,-45.0,3.97,132.0,2.4
2018-03-11 22:56:00,2098.3,15.7,-45.17,4.27,88.0,1.7
2018-03-11 23:16:00,2054.8,5.9,-44.85,3.82,44.0,1.7
2018-03-11 23:37:00,2056.1,5.9,-45.52,4.02,88.0,1.7
2018-03-11 23:57:00,2056.2,4.1,-45.0,3.75,132.0,2.7
2018-03-12 00:16:00,2071.1,10.8,-44.98,3.75,88.0,1.4
2018-03-12 00:37:00,2111.9,11.9,-44.9,3.79,88.0,1.4
2018-03-12 00:57:00,2141.8,15.8,-44.85,3.87,132.0,1.4
2018-03-12 01:17:00,2153.7,44.3,-44.72,3.9,88.0,0.7
2018-03-12 01:37:00,2136.2,18.5,-45.1,3.76,88.0,1.4
2018-03-12 01:57:00,2177.3,41.2,-44.72,3.96,132.0,2.7
2018-03-12 02:17:00,2184.1,11.5,-45.6,3.82,132.0,0.3
2018-03-12 02:36:00,2168.7,15.9,-45.45,3.53,132.0,2.7
2018-03-12 02:56:00,2163.5,11.4,-44.91,3.81,110.0,1.7
2018-03-12 03:16:00,2148.9,9.4,-45.39,3.76,110.0,3.1
2018-03-12 03:36:00,2141.4,13.2,-45.18,4.08,88.0,1.7
2018-03-12 03:57:00,2106.3,12.4,-44.99,3.81,110.0,2.4
2018-03-12 04:16:00,2124.6,15.5,-45.24,4.04,44.0,1.4
2018-03-12 04:36:00,2181.9,27.4,-45.16,3.71,110.0,1.4
2018-03-12 04:56:00,2246.6,34.3,-45.67,3.51,44.0,1.7
2018-03-12 05:16:00,2237.1,13.2,-45.93,3.58,88.0,3.1
2018-03-12 05:36:00,2185.1,17.6,-45.41,3.77,132.0,2.0
2018-03-12 05:56:00,2158.4,16.4,-45.11,3.8,22.0,2.0
2018-03-12 06:16:00,2115.6,7.5,-45.59,3.66,132.0,2.4
2018-03-12 06:32:00,2117.5,2.8,-45.29,3.98,44.0,1.7
2018-03-12 08:26:00,2204.0,24.1,-45.52,3.88,0.0,1.7
2018-03-12 08:47:00,2175.2,9.3,-45.17,3.67,44.0,1.4
2018-03-12 09:06:00,2142.2,22.7,-45.37,3.71,22.0,1.7
2018-03-12 09:26:00,2111.8,5.9,-44.85,3.69,88.0,2.0
2018-03-12 09:46:00,2084.8,13.3,-44.79,3.93,0.0,1.4
2018-03-12 10:06:00,2069.6,6.6,-44.66,3.89,88.0,1.4
2018-03-12 10:27:00,2079.4,10.5,-44.93,3.65,308.0,1.4
2018-03-12 10:46:00,2068.7,9.2,-45.17,3.72,308.0,1.4
2018-03-12 11:06:00,2065.5,5.9,-44.87,3.9,308.0,1.7
2018-03-12 11:27:00,2087.2,28.9,-44.86,3.99,308.0,2.0
2018-03-12 11:47:00,2108.9,14.3,-44.73,3.81,308.0,2.0
2018-03-12 12:07:00,2106.8,12.1,-44.46,4.2,264.0,1.7
2018-03-12 12:27:00,2110.6,8.7,-44.46,3.74,132.0,0.7
2018-03-12 12:47:00,2087.1,14.7,-44.92,3.86,0.0,2.0
2018-03-12 13:07:00,2072.8,8.7,-44.51,4.06,0.0,2.7
2018-03-12 13:27:00,2068.4,7.4,-44.78,3.98,308.0,2.7
2018-03-12 13:46:00,2055.2,7.5,-44.83,4.12,264.0,1.7
2018-03-12 14:07:00,2077.0,5.4,-45.06,3.77,286.0,3.7
2018-03-12 14:26:00,2082.5,5.2,-44.79,3.73,264.0,4.4
2018-03-12 14:46:00,2074.4,3.6,-45.1,4.23,264.0,3.7
2018-03-12 15:07:00,2070.4,6.5,-45.22,3.92,264.0,4.8
2018-03-12 15:27:00,2085.3,8.5,-45.15,3.87,308.0,2.7
2018-03-12 15:47:00,2087.0,6.2,-45.63,4.02,308.0,4.4
2018-03-12 16:06:00,2070.7,8.1,-45.28,3.97,308.0,3.7
2018-03-12 16:27:00,2070.6,4.8,-45.49,4.27,264.0,2.0
2018-03-12 16:46:00,2064.6,4.7,-45.48,3.84,308.0,2.7
2018-03-12 17:06:00,2055.5,4.7,-46.35,4.11,220.0,3.4
2018-03-12 17:26:00,2049.3,2.9,-45.66,3.76,264.0,4.8
2018-03-12 17:47:00,2053.6,9.9,-45.75,3.74,308.0,3.4
2018-03-12 18:02:00,2064.0,5.9,-45.9,3.9,264.0,2.7
2018-03-12 19:58:00,2039.8,5.3,-46.38,3.76,0.0,4.1
2018-03-12 20:17:00,2034.3,8.8,-46.3,3.65,330.0,2.4
2018-03-12 20:37:00,2041.8,7.0,-46.48,4.1,308.0,6.1
2018-03-12 20:58:00,2052.9,4.4,-46.12,4.19,308.0,2.7
2018-03-12 21:18:00,2067.7,6.6,-46.18,3.93,308.0,2.0
2018-03-12 21:37:00,2062.6,7.1,-46.28,3.93,308.0,3.1
2018-03-12 21:57:00,2059.8,7.0,-46.16,3.75,330.0,2.0
2018-03-12 22:17:00,2061.3,8.8,-46.8,3.81,308.0,4.4
2018-03-12 22:38:00,2042.4,9.6,-46.51,4.01,0.0,3.7
2018-03-12 22:58:00,2047.2,8.5,-46.25,4.2,308.0,2.4
2018-03-12 23:18:00,2034.4,9.9,-46.33,4.17,308.0,3.7
2018-03-12 23:38:00,2027.7,7.4,-46.49,4.21,308.0,3.7
2018-03-12 23:58:00,2041.8,7.6,-46.67,4.01,220.0,2.0
2018-03-13 00:18:00,2038.3,10.8,-46.5,3.97,264.0,3.1
2018-03-13 00:38:00,2024.5,7.3,-46.33,3.96,308.0,6.1
2018-03-13 00:57:00,2026.5,7.4,-46.64,4.03,220.0,1.7
2018-03-13 01:17:00,2022.3,5.5,-46.16,4.13,308.0,2.7
2018-03-13 01:38:00,2034.2,5.9,-46.29,3.96,308.0,3.1
2018-03-13 01:57:00,2018.7,7.0,-46.83,3.89,308.0,5.4
2018-03-13 02:18:00,2025.3,6.6,-46.6,4.15,308.0,2.4
2018-03-13 02:38:00,2025.1,11.1,-46.36,4.17,308.0,4.1
2018-03-13 02:58:00,2030.5,4.7,-47.27,4.03,330.0,1.7
2018-03-13 03:18:00,2036.7,9.0,-47.25,4.09,286.0,3.1
2018-03-13 03:38:00,2042.5,10.0,-47.01,4.07,0.0,2.7
2018-03-13 03:57:00,2055.0,8.7,-46.63,4.23,264.0,2.0
2018-03-13 04:17:00,2065.9,8.3,-46.44,3.92,308.0,2.4
2018-03-13 04:37:00,2082.5,12.5,-46.64,3.93,286.0,1.4
2018-03-13 04:57:00,2079.4,8.7,-46.66,3.69,308.0,1.7
2018-03-13 05:17:00,2078.1,8.7,-46.85,3.94,0.0,3.1
2018-03-13 05:37:00,2079.2,7.9,-46.81,3.51,308.0,3.1
2018-03-13 05:57:00,2094.2,7.2,-46.33,3.84,308.0,1.7
2018-03-13 06:18:00,2091.4,7.6,-46.69,3.8,264.0,2.0
2018-03-13 06:33:00,2103.1,8.6,-46.89,3.7,308.0,1.7
2018-03-13 08:27:00,2110.9,12.0,-46.48,3.72,264.0,3.1
2018-03-13 08:47:00,2098.7,9.2,-46.7,3.71,220.0,0.3
2018-03-13 09:08:00,2094.6,10.3,-46.82,3.9,264.0,3.4
2018-03-13 09:28:00,2072.3,7.8,-46.84,3.83,308.0,1.7
2018-03-13 09:48:00,2058.9,10.5,-46.5,4.01,220.0,3.1
2018-03-13 10:08:00,2043.7,5.6,-47.0,3.78,264.0,2.7
2018-03-13 10:27:00,2037.7,7.3,-46.8,3.84,308.0,2.0
2018-03-13 10:47:00,2026.9,12.6,-46.66,4.05,264.0,3.1
2018-03-13 11:07:00,2031.6,11.4,-46.86,3.97,264.0,1.4
2018-03-13 11:27:00,2043.8,9.8,-46.56,4.27,308.0,2.0
2018-03-13 11:47:00,2013.4,8.6,-46.69,4.24,330.0,1.0
2018-03-13 12:08:00,2013.7,8.8,-46.88,3.94,264.0,3.1
2018-03-13 12:28:00,2014.3,8.5,-46.6,3.98,264.0,2.0
2018-03-13 12:48:00,2027.2,12.6,-46.81,3.93,308.0,2.7
2018-03-13 13:08:00,2020.3,8.7,-46.66,3.92,264.0,2.4
2018-03-13 13:28:00,2026.4,8.5,-47.04,4.18,22.0,1.7
2018-03-13 13:48:00,2018.0,5.6,-46.88,3.84,264.0,1.7
2018-03-13 14:08:00,2029.6,15.4,-46.85,4.04,176.0,1.7
2018-03-13 14:28:00,2012.7,8.6,-46.78,3.99,220.0,2.0
2018-03-13 14:48:00,2021.3,8.5,-46.75,3.83,88.0,1.0
2018-03-13 15:07:00,2031.4,6.8,-46.62,3.85,242.0,1.4
2018-03-13 15:27:00,2015.1,8.0,-46.74,4.3,220.0,2.0
2018-03-13 15:47:00,2024.7,7.6,-46.41,3.76,308.0,1.0
2018-03-13 16:07:00,2025.5,4.8,-46.85,4.13,44.0,1.0
2018-03-13 16:28:00,2029.9,6.4,-46.78,4.12,286.0,1.0
2018-03-13 16:47:00,2038.7,8.0,-46.64,4.08,132.0,1.0
2018-03-13 17:07:00,2030.4,8.5,-46.77,4.04,264.0,2.0
2018-03-13 17:27:00,2020.3,8.7,-46.5,4.11,176.0,0.7
2018-03-13 17:47:00,2047.9,15.0,-46.34,4.09,220.0,1.0
2018-03-13 18:03:00,2078.4,19.6,-46.55,3.93,220.0,1.4
2018-03-13 19:58:00,2212.1,9.5,-46.24,3.76,264.0,1.7
2018-03-13 20:18:00,2189.1,15.3,-46.49,3.76,264.0,2.4
2018-03-13 20:38:00,2171.9,13.5,-45.93,3.76,154.0,1.4
2018-03-13 20:59:00,2128.4,16.9,-46.24,3.87,220.0,1.0
2018-03-13 21:19:00,2120.5,16.6,-45.54,3.73,198.0,1.7
2018-03-13 21:39:00,2192.0,13.4,-46.25,3.83,132.0,2.0
2018-03-13 21:58:00,2197.8,7.9,-46.21,3.42,220.0,2.0
2018-03-13 22:18:00,2161.4,13.8,-45.72,3.83,176.0,1.7
2018-03-13 22:39:00,2136.9,8.3,-45.67,3.76,330.0,1.7
2018-03-13 22:59:00,2143.9,7.4,-46.31,3.61,176.0,1.7
2018-03-13 23:19:00,2137.2,19.1,-45.68,3.64,132.0,1.4
2018-03-13 23:39:00,2138.7,12.3,-46.2,3.93,264.0,1.4
2018-03-13 23:59:00,2141.5,7.9,-46.26,3.9,220.0,1.0
2018-03-14 00:19:00,2167.3,11.4,-46.08,3.62,176.0,2.0
2018-03-14 00:38:00,2169.9,9.3,-45.89,3.69,220.0,1.0
2018-03-14 00:59:00,2158.6,11.3,-46.32,3.87,176.0,1.4
2018-03-14 01:19:00,2189.7,15.0,-46.58,3.67,176.0,0.7
2018-03-14 01:39:00,2172.7,16.1,-46.4,3.71,176.0,1.0
2018-03-14 01:58:00,2156.8,23.7,-46.3,3.94,176.0,1.0
2018-03-14 02:18:00,2178.7,38.3,-46.84,3.77,88.0,1.7
2018-03-14 02:39:00,2270.4,53.6,-46.27,3.65,110.0,2.0
2018-03-14 02:59:00,2244.4,43.6,-46.35,3.64,132.0,0.3
2018-03-14 03:19:00,2287.5,62.6,-45.89,3.54,176.0,1.0
2018-03-14 03:38:00,2242.0,47.6,-45.34,3.61,132.0,1.0
2018-03-14 03:58:00,2158.7,48.3,-45.77,3.83,132.0,2.7
2018-03-14 04:18:00,2164.9,37.3,-46.08,4.07,110.0,3.4
2018-03-14 04:38:00,2077.9,37.1,-46.01,4.02,0.0,1.7
2018-03-14 04:59:00,2111.1,45.8,-46.16,3.93,88.0,3.4
2018-03-14 05:19:00,2168.1,59.1,-45.91,3.9,88.0,1.7
2018-03-14 05:39:00,2160.9,44.3,-45.83,3.73,132.0,1.7
2018-03-14 05:58:00,2144.1,56.3,-45.86,3.38,220.0,1.4
2018-03-14 06:18:00,2065.0,4.1,-46.47,3.72,88.0,2.7
2018-03-14 06:34:00,2062.3,1.1,-46.84,3.72,88.0,2.7
2018-03-14 08:30:00,2112.1,26.2,-46.1,3.95,88.0,3.1
2018-03-14 08:49:00,2082.2,26.9,-46.4,3.88,176.0,4.8
2018-03-14 09:09:00,2054.2,37.0,-45.87,3.93,132.0,4.8
2018-03-14 09:30:00,2063.7,42.1,-45.85,3.95,176.0,3.4
2018-03-14 09:49:00,2042.6,24.4,-46.38,3.87,220.0,5.8
2018-03-14 10:09:00,2027.4,29.4,-46.39,3.89,154.0,2.7
2018-03-14 10:29:00,2025.8,23.1,-46.32,3.8,132.0,4.8
2018-03-14 10:49:00,2033.1,31.7,-45.93,3.79,198.0,4.4
2018-03-14 11:10:00,1999.2,12.3,-46.23,3.82,0.0,4.8
2018-03-14 11:30:00,2006.4,19.6,-46.43,4.29,220.0,3.7
2018-03-14 11:50:00,2005.4,29.5,-46.05,4.21,132.0,6.5
2018-03-14 12:10:00,1985.2,10.8,-46.72,3.99,132.0,4.8
2018-03-14 12:30:00,1993.0,14.7,-46.51,4.07,176.0,7.1
2018-03-14 12:50:00,2010.7,21.9,-46.34,3.83,132.0,5.1
2018-03-14 13:10:00,2043.2,30.4,-46.52,4.09,176.0,6.8
2018-03-14 13:30:00,2011.5,33.6,-46.16,3.96,132.0,5.4
2018-03-14 13:50:00,2051.0,26.5,-46.02,3.93,154.0,4.4
2018-03-14 14:10:00,2026.3,32.8,-45.66,4.09,88.0,3.4
2018-03-14 14:30:00,2051.8,37.3,-46.17,3.86,132.0,4.4
2018-03-14 14:49:00,2062.2,38.2,-46.11,3.71,110.0,3.7
2018-03-14 15:09:00,2046.1,34.9,-46.01,4.16,132.0,2.4
2018-03-14 15:30:00,2040.2,30.6,-45.81,3.93,308.0,1.4
2018-03-14 15:50:00,2015.3,25.1,-46.17,3.81,132.0,4.8
2018-03-14 16:10:00,2011.2,28.5,-46.32,4.04,88.0,2.7
2018-03-14 16:30:00,2016.3,24.0,-46.19,4.23,88.0,2.0
2018-03-14 16:50:00,2018.9,31.8,-46.42,3.76,0.0,4.1
2018-03-14 17:10:00,2026.1,21.8,-46.48,3.99,88.0,4.8
2018-03-14 17:29:00,1997.4,13.2,-45.99,4.11,154.0,3.4
2018-03-14 17:49:00,1992.4,18.7,-46.6,3.81,176.0,2.7
2018-03-14 18:05:00,1989.9,5.1,-46.49,3.92,88.0,3.4
2018-03-14 20:00:00,1985.3,4.2,-46.6,4.15,88.0,4.4
2018-03-14 20:20:00,1991.2,4.4,-46.15,3.97,176.0,5.1
2018-03-14 20:40:00,1990.8,3.6,-46.19,3.84,44.0,4.4
2018-03-14 21:00:00,1997.9,5.8,-46.19,4.1,88.0,5.1
2018-03-14 21:20:00,1998.2,4.1,-45.86,3.82,88.0,4.4
2018-03-14 21:39:00,2003.3,4.3,-45.59,3.92,132.0,5.1
2018-03-14 21:59:00,2009.4,3.8,-46.09,4.11,132.0,5.1
2018-03-14 22:19:00,2017.2,6.8,-46.03,3.79,88.0,4.4
2018-03-14 22:40:00,2016.3,3.7,-46.11,3.89,88.0,4.4
2018-03-14 23:00:00,2017.3,4.4,-46.03,4.11,132.0,5.8
2018-03-14 23:20:00,2016.7,2.9,-45.53,4.22,88.0,4.1
2018-03-14 23:39:00,2019.0,3.6,-45.81,4.07,0.0,4.1
2018-03-14 23:59:00,2019.7,3.7,-45.83,3.88,88.0,6.1
2018-03-15 00:19:00,2017.5,3.1,-45.85,4.01,0.0,3.4
2018-03-15 00:39:00,2020.1,4.1,-45.89,4.09,44.0,4.4
2018-03-15 01:00:00,2024.4,22.1,-45.83,3.8,88.0,2.0
2018-03-15 01:20:00,2007.6,4.0,-45.38,4.11,66.0,2.7
2018-03-15 01:39:00,2010.0,6.6,-45.48,3.91,44.0,4.8
2018-03-15 01:59:00,2017.8,8.5,-45.67,3.99,88.0,2.4
2018-03-15 02:20:00,2015.3,3.5,-45.2,3.8,44.0,5.8
2018-03-15 02:40:00,2027.8,19.0,-45.41,3.79,44.0,2.4
2018-03-15 02:59:00,2023.7,4.6,-45.38,3.93,0.0,3.4
2018-03-15 03:19:00,2019.7,4.7,-45.82,3.98,44.0,3.4
2018-03-15 03:40:00,2018.6,16.2,-44.91,3.67,132.0,3.4
2018-03-15 03:59:00,2016.0,5.8,-44.81,4.17,44.0,2.4
2018-03-15 04:19:00,2020.2,7.8,-45.25,4.21,132.0,2.0
2018-03-15 04:39:00,2024.4,14.1,-45.17,4.12,66.0,1.4
2018-03-15 04:59:00,2052.9,29.7,-44.87,4.2,132.0,1.7
2018-03-15 05:19:00,2124.6,55.1,-44.25,3.85,132.0,1.0
2018-03-15 05:40:00,2138.6,46.9,-44.41,3.74,176.0,2.4
2018-03-15 06:00:00,2100.5,43.0,-44.22,3.81,176.0,2.7
2018-03-15 06:20:00,2080.1,22.6,-44.83,3.94,176.0,1.4
2018-03-15 06:35:00,2063.0,26.4,-44.79,4.23,176.0,2.0
2018-03-15 08:30:00,2113.1,57.0,-44.92,3.71,154.0,2.0
2018-03-15 08:49:00,2064.0,27.5,-44.39,3.97,132.0,2.7
2018-03-15 09:09:00,2055.6,24.0,-44.76,4.06,176.0,3.4
2018-03-15 09:29:00,2089.8,85.8,-44.23,3.78,88.0,1.4
2018-03-15 09:49:00,2065.1,42.9,-43.92,3.8,176.0,2.7
2018-03-15 10:09:00,2046.8,12.2,-44.48,3.99,176.0,2.7
2018-03-15 10:29:00,2067.1,11.1,-44.78,3.86,176.0,2.0
2018-03-15 10:50:00,2090.5,43.1,-44.82,3.9,176.0,2.0
2018-03-15 11:10:00,2124.5,82.0,-44.53,3.77,132.0,1.0
2018-03-15 11:30:00,2037.8,40.2,-44.58,3.82,176.0,2.0
2018-03-15 11:50:00,2087.7,45.4,-44.23,4.01,132.0,3.7
2018-03-15 12:10:00,2069.5,39.9,-44.66,4.25,132.0,1.7
2018-03-15 12:29:00,2022.8,25.6,-44.37,4.06,176.0,2.0
2018-03-15 12:49:00,2027.7,14.7,-44.62,4.11,88.0,2.7
2018-03-15 13:09:00,2043.8,14.7,-45.3,4.13,132.0,2.4
2018-03-15 13:30:00,2075.8,50.8,-44.93,4.22,132.0,3.1
2018-03-15 13:50:00,2056.3,43.5,-44.49,3.93,220.0,2.0
2018-03-15 14:10:00,2070.9,59.9,-44.27,4.02,132.0,1.0
2018-03-15 14:29:00,2067.1,70.3,-45.25,4.15,132.0,1.4
2018-03-15 14:49:00,2024.0,19.8,-45.21,3.91,176.0,0.7
2018-03-15 15:09:00,2034.0,38.8,-45.57,4.01,132.0,3.1
2018-03-15 15:30:00,2081.6,56.3,-44.86,3.77,176.0,2.4
2018-03-15 15:50:00,2056.7,60.7,-44.42,3.83,220.0,2.4
2018-03-15 16:09:00,2022.8,29.8,-45.37,3.99,176.0,4.4
2018-03-15 16:29:00,2036.2,58.8,-45.39,4.24,176.0,2.7
2018-03-15 16:50:00,2012.4,10.6,-45.71,4.17,132.0,3.4
2018-03-15 17:09:00,2029.3,45.2,-45.69,3.88,132.0,3.1
2018-03-15 17:29:00,1998.7,22.2,-45.18,3.8,44.0,1.7
2018-03-15 17:50:00,2004.8,49.6,-45.41,4.21,88.0,3.1
2018-03-15 18:05:00,2045.6,29.9,-45.26,4.05,110.0,1.4
2018-03-15 20:00:00,2033.9,7.3,-45.7,3.82,132.0,2.4
2018-03-15 20:20:00,2045.1,5.2,-45.48,3.86,132.0,3.4
2018-03-15 20:40:00,2039.0,3.5,-45.17,3.62,88.0,2.7
2018-03-15 21:00:00,2047.0,8.2,-44.85,3.83,132.0,3.4
2018-03-15 21:21:00,2050.2,9.4,-45.34,4.01,132.0,2.7
2018-03-15 21:41:00,2082.3,24.7,-45.03,4.08,220.0,3.1
2018-03-15 22:01:00,2098.6,6.9,-45.03,3.81,88.0,1.7
2018-03-15 22:20:00,2092.4,15.9,-44.78,3.87,88.0,2.7
2018-03-15 22:40:00,2063.8,13.9,-44.41,4.12,132.0,3.1
2018-03-15 23:00:00,2066.1,16.0,-45.06,4.02,44.0,2.4
2018-03-15 23:20:00,2043.3,14.8,-44.83,4.04,132.0,1.0
2018-03-15 23:41:00,2047.2,14.0,-44.73,4.05,88.0,2.7
2018-03-16 00:00:00,2121.3,12.0,-45.23,3.72,132.0,3.7
2018-03-16 00:20:00,2149.6,3.8,-45.21,3.84,88.0,3.1
2018-03-16 00:40:00,2124.6,18.1,-44.6,3.7,44.0,3.4
2018-03-16 01:00:00,2106.8,6.4,-44.85,4.07,44.0,2.0
2018-03-16 01:20:00,2133.7,51.8,-44.63,3.86,110.0,1.7
2018-03-16 01:40:00,2125.7,49.1,-44.38,3.79,176.0,2.4
2018-03-16 02:01:00,2069.2,44.0,-44.68,3.71,176.0,2.0
2018-03-16 02:21:00,2058.0,32.2,-44.84,4.09,330.0,2.0
2018-03-16 02:41:00,2048.3,24.2,-45.01,3.77,132.0,1.4
2018-03-16 03:01:00,2005.5,7.2,-45.51,3.8,220.0,3.1
2018-03-16 03:20:00,2014.4,7.7,-45.2,3.85,132.0,3.4
2018-03-16 03:40:00,2004.0,12.5,-45.23,3.75,220.0,2.4
2018-03-16 04:00:00,1983.2,4.3,-45.14,3.9,220.0,3.4
2018-03-16 04:20:00,1984.3,4.9,-44.85,4.2,220.0,3.7
2018-03-16 04:41:00,1981.3,5.4,-45.42,4.3,308.0,3.1
2018-03-16 05:01:00,1990.2,9.6,-45.61,3.8,198.0,2.0
2018-03-16 05:21:00,2004.9,6.1,-45.47,4.13,176.0,3.4
2018-03-16 05:40:00,2006.5,4.1,-45.6,3.71,44.0,0.0
2018-03-16 06:00:00,2007.7,6.1,-45.04,3.99,264.0,1.7
2018-03-16 06:20:00,2032.7,14.2,-45.37,3.99,132.0,1.0
2018-03-16 06:36:00,2057.1,16.6,-45.43,3.63,198.0,3.1
2018-03-16 08:31:00,1996.4,5.7,-45.73,4.08,176.0,3.1
2018-03-16 08:50:00,2007.3,11.9,-45.52,3.88,198.0,2.7
2018-03-16 09:10:00,1992.8,9.7,-45.48,4.06,308.0,4.4
2018-03-16 09:30:00,1994.6,8.8,-45.76,3.83,220.0,3.1
2018-03-16 09:51:00,1991.6,13.7,-45.57,4.0,176.0,3.7
2018-03-16 10:11:00,1981.1,4.4,-45.36,3.83,264.0,2.7
2018-03-16 10:31:00,1977.1,5.4,-45.67,4.17,0.0,1.7
2018-03-16 10:51:00,1973.5,4.4,-45.82,3.99,330.0,2.0
2018-03-16 11:10:00,1974.2,5.6,-45.92,4.08,264.0,2.7
2018-03-16 11:31:00,1975.7,6.9,-46.3,4.2,220.0,2.0
2018-03-16 11:51:00,1977.2,5.4,-46.38,4.02,220.0,3.1
2018-03-16 12:11:00,1976.0,4.6,-46.69,3.74,44.0,3.1
2018-03-16 12:31:00,1983.3,10.6,-46.32,4.1,308.0,3.1
2018-03-16 12:50:00,1983.3,7.3,-46.71,3.93,308.0,2.4
2018-03-16 13:11:00,1986.6,6.6,-46.46,3.98,308.0,1.0
2018-03-16 13:31:00,1981.9,8.9,-46.22,3.98,132.0,2.0
2018-03-16 13:51:00,1982.1,9.3,-46.65,4.24,198.0,0.3
2018-03-16 14:11:00,2007.0,18.1,-46.09,3.96,154.0,1.7
2018-03-16 14:31:00,2001.2,7.3,-46.33,4.11,308.0,2.0
2018-03-16 14:50:00,1994.7,4.9,-46.35,4.22,308.0,2.7
2018-03-16 15:10:00,1998.2,4.9,-46.14,4.08,308.0,1.4
2018-03-16 15:31:00,1997.8,5.4,-46.17,4.03,308.0,1.0
2018-03-16 15:51:00,1995.5,9.8,-46.54,4.24,220.0,1.4
2018-03-16 16:10:00,2015.1,7.9,-45.99,3.91,308.0,1.0
2018-03-16 16:31:00,2008.3,12.3,-46.31,3.87,44.0,0.0
2018-03-16 16:51:00,2015.9,12.1,-46.18,4.01,88.0,1.7
2018-03-16 17:11:00,2026.2,15.5,-46.25,4.03,264.0,1.0
2018-03-16 17:30:00,2051.7,32.3,-45.73,3.89,308.0,0.7
2018-03-16 17:50:00,2060.0,36.1,-45.91,4.04,0.0,1.0
2018-03-16 18:06:00,2027.4,13.6,-45.71,3.74,264.0,1.0
2018-03-16 20:01:00,2080.4,11.6,-45.7,3.7,176.0,1.7
2018-03-16 20:21:00,2106.1,21.9,-45.6,3.9,176.0,0.3
2018-03-16 20:41:00,2105.7,35.0,-45.71,3.68,176.0,0.0
2018-03-16 21:01:00,2141.3,28.9,-45.65,3.73,88.0,0.3
2018-03-16 21:21:00,2089.9,17.4,-45.49,3.9,132.0,0.7
2018-03-16 21:41:00,2124.7,67.3,-45.93,4.15,0.0,2.0
2018-03-16 22:01:00,2140.8,39.1,-46.25,3.36,88.0,3.7
2018-03-16 22:22:00,2159.0,93.7,-45.72,3.84,110.0,6.1
2018-03-16 22:42:00,2133.7,54.6,-45.68,3.74,44.0,5.1
2018-03-16 23:01:00,2094.6,60.6,-46.02,4.03,110.0,5.1
2018-03-16 23:21:00,2108.7,57.5,-45.57,3.65,44.0,3.7
2018-03-16 23:41:00,2051.0,21.1,-46.33,3.89,88.0,3.1
2018-03-17 00:01:00,2087.5,51.3,-45.67,3.7,132.0,4.8
2018-03-17 00:21:00,2049.5,23.6,-46.21,3.7,110.0,8.2
2018-03-17 00:42:00,2176.3,53.7,-46.07,3.72,66.0,4.1
2018-03-17 01:02:00,2152.0,51.5,-46.14,3.87,88.0,4.1
2018-03-17 01:21:00,2200.3,38.1,-45.91,3.88,44.0,5.1
2018-03-17 01:41:00,2212.2,50.4,-46.02,3.63,44.0,6.5
2018-03-17 02:01:00,2215.5,59.2,-45.82,3.58,132.0,3.7
2018-03-17 02:22:00,2211.5,62.4,-45.74,3.64,66.0,5.1
2018-03-17 02:42:00,2184.1,53.2,-45.96,3.85,44.0,6.5
2018-03-17 03:01:00,2184.2,54.2,-46.43,3.79,242.0,5.1
2018-03-17 03:21:00,2155.4,43.5,-46.13,3.79,66.0,7.5
2018-03-17 03:42:00,2153.1,42.6,-46.0,3.64,44.0,2.0
2018-03-17 04:01:00,2114.2,33.8,-46.53,4.13,88.0,4.8
2018-03-17 04:21:00,2168.3,48.7,-46.06,3.9,88.0,4.4
2018-03-17 04:42:00,2190.6,58.8,-46.14,3.54,132.0,7.1
2018-03-17 05:01:00,2144.7,47.6,-46.29,3.58,66.0,7.5
2018-03-17 05:21:00,2119.8,35.3,-46.64,3.64,132.0,6.5
2018-03-17 05:42:00,2118.5,31.0,-46.72,3.64,44.0,3.7
2018-03-17 06:02:00,2112.2,41.5,-46.53,4.06,44.0,6.8
2018-03-17 06:22:00,2099.8,40.7,-46.23,4.09,88.0,7.5
2018-03-17 06:37:00,2150.2,53.8,-45.86,3.88,44.0,5.8
2018-03-17 08:32:00,2065.9,47.6,-46.4,4.29,88.0,5.8
2018-03-17 08:52:00,2016.7,14.4,-46.73,4.29,308.0,3.4
2018-03-17 09:12:00,2020.9,10.3,-47.06,4.22,0.0,3.7
2018-03-17 09:32:00,2032.5,22.8,-47.07,3.98,44.0,5.1
2018-03-17 09:51:00,2064.4,38.1,-46.77,3.77,44.0,6.1
2018-03-17 10:11:00,2056.1,49.9,-46.46,3.83,44.0,8.5
2018-03-17 10:31:00,2057.2,44.2,-46.73,3.72,0.0,6.5
2018-03-17 10:51:00,2064.7,36.8,-46.8,3.68,88.0,9.2
2018-03-17 11:12:00,2070.0,35.0,-46.66,3.79,44.0,4.1
2018-03-17 11:32:00,2038.0,53.2,-47.19,3.78,330.0,3.4
2018-03-17 11:52:00,2070.2,42.3,-46.74,3.83,0.0,6.5
2018-03-17 12:11:00,2077.9,51.0,-46.81,3.49,88.0,8.8
2018-03-17 12:31:00,2096.2,62.3,-46.27,3.96,88.0,6.5
2018-03-17 12:51:00,2106.6,51.0,-46.91,3.6,44.0,6.8
2018-03-17 13:11:00,2109.6,68.5,-46.58,3.88,44.0,6.5
2018-03-17 13:32:00,2116.9,68.3,-46.66,3.56,44.0,9.2
2018-03-17 13:51:00,2069.5,54.8,-47.3,3.82,44.0,6.8
2018-03-17 14:11:00,2046.5,37.7,-47.09,3.98,44.0,6.1
2018-03-17 14:31:00,2056.8,57.1,-47.08,3.96,308.0,4.4
2018-03-17 14:51:00,2057.1,53.2,-46.9,3.93,44.0,7.1
2018-03-17 15:11:00,2094.8,49.0,-47.22,3.9,308.0,5.4
2018-03-17 15:31:00,2091.0,67.9,-46.51,3.84,44.0,3.7
2018-03-17 15:51:00,2021.6,27.0,-47.39,3.89,44.0,5.1
2018-03-17 16:11:00,2012.3,20.0,-47.12,3.88,44.0,4.1
2018-03-17 16:31:00,2004.1,11.5,-47.21,3.76,176.0,3.1
2018-03-17 16:51:00,2042.7,37.1,-47.23,3.84,308.0,5.4
2018-03-17 17:11:00,2020.9,32.8,-46.84,4.05,88.0,3.4
2018-03-17 17:32:00,2024.8,22.5,-46.95,4.21,88.0,5.1
2018-03-17 17:52:00,2010.6,11.0,-47.44,4.08,44.0,6.8
2018-03-17 18:07:00,2007.1,2.9,-47.3,3.69,264.0,3.4
2018-03-17 20:02:00,2044.0,33.0,-47.22,3.96,0.0,5.4
2018-03-17 20:23:00,2069.5,43.9,-47.12,4.09,44.0,3.1
2018-03-17 20:43:00,2088.0,40.2,-46.5,3.77,44.0,3.4
2018-03-17 21:03:00,2079.4,42.7,-47.09,4.06,88.0,2.7
2018-03-17 21:23:00,2103.7,57.1,-46.71,3.95,88.0,6.1
2018-03-17 21:43:00,2083.9,33.0,-47.07,3.96,176.0,3.1
2018-03-17 22:03:00,2128.3,69.6,-46.62,3.83,0.0,3.1
2018-03-17 22:22:00,2087.3,45.9,-46.64,3.93,44.0,5.1
2018-03-17 22:42:00,2107.1,45.5,-46.47,3.79,88.0,4.4
2018-03-17 23:02:00,2096.5,67.2,-46.46,3.88,88.0,4.4
2018-03-17 23:22:00,2062.0,32.2,-47.12,4.09,66.0,4.8
2018-03-17 23:43:00,2049.8,28.5,-47.46,3.77,44.0,5.4
2018-03-18 00:02:00,2044.3,19.8,-46.85,4.04,308.0,3.4
2018-03-18 00:22:00,2063.0,35.8,-47.11,3.87,44.0,4.4
2018-03-18 00:42:00,2111.0,44.4,-46.25,3.61,44.0,5.1
2018-03-18 01:02:00,2099.5,29.8,-46.54,3.82,154.0,8.2
2018-03-18 01:22:00,2078.0,28.0,-46.61,3.66,44.0,8.5
2018-03-18 01:42:00,2110.0,33.8,-46.52,3.73,44.0,6.1
2018-03-18 02:02:00,2127.1,38.1,-46.46,3.8,44.0,4.8
2018-03-18 02:22:00,2112.1,53.9,-46.2,3.93,132.0,5.4
2018-03-18 02:43:00,2140.0,47.7,-46.05,3.87,44.0,4.4
2018-03-18 03:03:00,2111.1,41.0,-46.83,3.85,88.0,4.1
2018-03-18 03:23:00,2100.8,26.2,-46.26,3.94,44.0,4.1
2018-03-18 03:42:00,2127.5,43.1,-45.99,3.84,132.0,4.4
2018-03-18 04:02:00,2127.6,36.4,-46.28,4.04,44.0,4.4
2018-03-18 04:22:00,2121.8,40.5,-45.69,3.9,66.0,6.1
2018-03-18 04:42:00,2091.3,37.8,-46.34,3.88,132.0,5.4
2018-03-18 05:03:00,2090.0,54.8,-46.36,3.72,110.0,7.1
2018-03-18 05:22:00,2115.9,40.9,-46.0,3.89,44.0,5.8
2018-03-18 05:43:00,2119.8,30.0,-46.39,3.61,220.0,4.4
2018-03-18 06:03:00,2136.0,33.8,-46.2,3.73,44.0,7.8
2018-03-18 06:22:00,2113.4,51.4,-46.25,3.87,132.0,4.8
2018-03-18 06:38:00,2083.7,39.2,-46.29,3.78,88.0,6.5
2018-03-18 08:33:00,2149.9,50.7,-46.27,3.5,88.0,6.5
2018-03-18 08:53:00,2153.8,44.0,-46.52,3.9,88.0,7.5
2018-03-18 09:12:00,2148.8,44.2,-46.1,3.53,66.0,7.5
2018-03-18 09:32:00,2156.4,46.9,-46.34,3.75,88.0,5.8
2018-03-18 09:52:00,2120.2,39.8,-46.14,3.91,44.0,6.8
2018-03-18 10:12:00,2152.7,52.1,-46.27,3.7,88.0,5.4
2018-03-18 10:32:00,2140.9,40.4,-46.17,3.78,44.0,8.5
2018-03-18 10:53:00,2155.7,33.8,-46.72,3.74,88.0,3.7
2018-03-18 11:13:00,2165.4,63.0,-46.21,3.5,44.0,4.1
2018-03-18 11:32:00,2147.4,49.7,-46.49,3.78,88.0,6.8
2018-03-18 11:53:00,2164.2,57.7,-46.16,3.71,44.0,5.8
2018-03-18 12:13:00,2120.6,41.4,-46.36,3.68,44.0,7.5
2018-03-18 12:32:00,2154.1,49.9,-46.38,3.79,88.0,6.8
2018-03-18 12:53:00,2103.1,41.4,-46.66,3.58,44.0,4.8
2018-03-18 13:13:00,2137.6,52.8,-46.35,3.87,88.0,8.5
2018-03-18 13:32:00,2144.8,55.1,-46.57,3.81,88.0,6.5
2018-03-18 13:53:00,2123.4,23.2,-46.6,3.81,44.0,6.5
2018-03-18 14:13:00,2138.1,38.6,-46.34,3.84,0.0,4.1
2018-03-18 14:32:00,2156.4,60.3,-46.19,3.72,176.0,6.5
2018-03-18 14:53:00,2152.2,70.0,-46.24,3.77,88.0,9.5
2018-03-18 15:13:00,2107.9,41.8,-46.93,4.12,132.0,5.4
2018-03-18 15:33:00,2114.7,62.8,-46.02,3.91,44.0,2.7
2018-03-18 15:53:00,2115.7,52.9,-46.37,3.81,44.0,4.8
2018-03-18 16:12:00,2101.4,43.5,-46.02,3.94,22.0,2.7
2018-03-18 16:32:00,2156.9,73.9,-46.28,3.79,0.0,6.1
2018-03-18 16:52:00,2094.1,28.1,-46.08,4.0,0.0,3.4
2018-03-18 17:13:00,2049.2,15.1,-46.15,3.99,132.0,4.4
2018-03-18 17:32:00,2049.7,7.3,-46.07,3.9,44.0,3.4
2018-03-18 17:53:00,2047.9,4.5,-46.5,3.96,220.0,2.7
2018-03-18 18:08:00,2053.0,8.5,-46.16,3.81,88.0,6.5
2018-03-18 20:03:00,2082.7,32.1,-45.9,3.87,132.0,5.8
2018-03-18 20:23:00,2078.1,19.6,-45.58,3.64,22.0,2.7
2018-03-18 20:43:00,2103.0,29.0,-45.56,3.78,88.0,3.7
2018-03-18 21:04:00,2073.5,14.1,-45.92,3.86,242.0,2.0
2018-03-18 21:23:00,2108.0,32.6,-45.68,3.57,88.0,4.1
2018-03-18 21:43:00,2164.5,71.7,-45.17,3.6,88.0,4.4
2018-03-18 22:03:00,2147.1,45.4,-45.36,3.75,22.0,4.4
2018-03-18 22:24:00,2136.9,39.6,-45.61,4.08,22.0,2.7
2018-03-18 22:44:00,2155.8,38.8,-45.62,3.67,132.0,3.4
2018-03-18 23:04:00,2151.1,53.0,-45.64,4.0,110.0,6.1
2018-03-18 23:23:00,2114.4,42.7,-45.58,3.97,176.0,5.1
2018-03-18 23:44:00,2128.4,47.7,-45.8,3.67,88.0,3.7
2018-03-19 00:04:00,2081.5,34.2,-45.84,3.8,88.0,6.1
2018-03-19 00:24:00,2068.0,21.0,-45.79,3.78,132.0,3.1
2018-03-19 00:44:00,2078.7,25.3,-46.23,4.03,88.0,3.4
2018-03-19 01:04:00,2097.2,61.0,-45.81,3.61,66.0,4.4
2018-03-19 01:24:00,2101.0,41.0,-46.5,3.69,22.0,4.1
2018-03-19 01:43:00,2099.1,32.3,-46.44,4.08,44.0,4.8
2018-03-19 02:04:00,2052.8,11.3,-46.23,4.09,22.0,3.1
2018-03-19 02:24:00,2091.7,44.5,-46.19,3.89,88.0,4.1
2018-03-19 02:44:00,2063.4,29.8,-46.43,3.66,22.0,3.1
2018-03-19 03:04:00,2047.5,16.5,-46.79,3.71,88.0,5.1
2018-03-19 03:24:00,2032.4,4.2,-46.61,3.86,0.0,4.4
2018-03-19 03:44:00,2030.0,5.9,-46.86,3.86,66.0,4.4
2018-03-19 04:04:00,2029.2,9.1,-47.74,3.8,44.0,3.7
2018-03-19 04:24:00,2033.3,11.0,-46.81,3.92,44.0,3.7
2018-03-19 04:44:00,2051.5,32.4,-46.69,3.87,176.0,5.8
2018-03-19 05:04:00,2039.9,14.8,-46.46,3.97,220.0,4.1
2018-03-19 05:24:00,2044.1,14.6,-46.97,3.96,44.0,5.4
2018-03-19 05:43:00,2039.2,23.0,-47.04,3.74,110.0,4.1
2018-03-19 06:03:00,2038.8,9.8,-46.83,3.68,0.0,2.4
2018-03-19 06:24:00,2033.1,24.2,-47.06,3.91,308.0,2.7
2018-03-19 06:39:00,2027.9,11.3,-47.11,3.7,88.0,4.8
2018-03-19 08:34:00,2034.4,28.4,-47.09,3.8,44.0,5.1
2018-03-19 08:54:00,2036.8,33.6,-47.0,3.66,88.0,5.1
2018-03-19 09:13:00,2043.5,29.0,-46.75,3.91,0.0,6.1
2018-03-19 09:33:00,2060.8,35.9,-46.79,3.95,66.0,5.1
2018-03-19 09:53:00,2032.7,30.8,-46.91,3.79,132.0,3.1
2018-03-19 10:14:00,2067.8,52.6,-46.48,3.77,44.0,7.1
2018-03-19 10:34:00,2058.4,33.7,-46.74,3.74,0.0,8.2
2018-03-19 10:54:00,2108.8,66.6,-46.13,3.95,66.0,6.8
2018-03-19 11:14:00,2051.1,42.1,-46.72,4.01,286.0,4.1
2018-03-19 11:34:00,2096.4,53.2,-45.91,3.59,88.0,10.9
2018-03-19 11:54:00,2098.9,47.4,-46.12,3.67,44.0,6.8
2018-03-19 12:13:00,2088.5,57.4,-46.39,4.12,88.0,2.7
2018-03-19 12:33:00,2098.8,54.2,-46.51,3.9,44.0,4.8
2018-03-19 12:54:00,2132.3,55.6,-46.46,3.65,88.0,6.1
2018-03-19 13:14:00,2049.8,48.8,-46.3,4.01,44.0,7.1
2018-03-19 13:34:00,2097.5,57.5,-46.29,3.75,44.0,5.8
2018-03-19 13:54:00,2062.9,39.9,-46.35,3.85,44.0,9.2
2018-03-19 14:14:00,2058.3,49.5,-46.66,3.66,44.0,5.1
2018-03-19 14:33:00,2021.2,41.1,-46.75,4.15,44.0,3.1
2018-03-19 14:53:00,2082.9,36.8,-46.15,3.72,176.0,7.1
2018-03-19 15:13:00,2094.7,74.5,-46.42,3.68,88.0,6.8
2018-03-19 15:33:00,2057.7,52.3,-46.46,3.83,264.0,4.4
2018-03-19 15:53:00,2068.7,65.1,-46.44,3.95,44.0,7.5
2018-03-19 16:13:00,2067.5,80.8,-46.89,4.15,0.0,4.8
2018-03-19 16:33:00,2011.8,40.7,-46.7,3.87,44.0,2.7
2018-03-19 16:53:00,2041.1,56.9,-46.93,3.79,44.0,5.8
2018-03-19 17:13:00,2023.5,33.3,-46.87,3.97,308.0,8.8
2018-03-19 17:34:00,2074.7,52.0,-46.55,3.97,220.0,4.8
2018-03-19 17:54:00,2029.5,26.7,-46.42,4.03,66.0,2.0
2018-03-19 18:09:00,2010.2,19.1,-46.48,3.84,132.0,7.8
2018-03-19 20:04:00,1989.0,6.1,-46.14,4.0,44.0,3.7
2018-03-19 20:24:00,1991.4,2.0,-45.64,3.93,88.0,2.7
2018-03-19 20:44:00,1986.8,3.0,-45.33,4.04,0.0,3.7
2018-03-19 21:04:00,1988.7,5.7,-45.47,3.86,88.0,2.0
2018-03-19 21:24:00,1989.1,1.6,-45.3,4.15,0.0,4.1
2018-03-19 21:45:00,1990.2,2.9,-45.22,3.95,0.0,4.4
2018-03-19 22:04:00,1997.9,2.1,-45.0,3.86,44.0,6.1
2018-03-19 22:24:00,1994.8,2.1,-45.05,3.98,88.0,3.4
2018-03-19 22:45:00,1998.5,2.8,-44.99,4.32,44.0,4.1
2018-03-19 23:05:00,1995.8,2.9,-45.15,4.06,44.0,3.1
2018-03-19 23:25:00,1990.7,1.7,-44.88,4.2,132.0,3.7
2018-03-19 23:45:00,1986.8,3.2,-44.91,4.02,88.0,4.8
2018-03-20 00:05:00,1987.5,2.7,-45.27,3.98,0.0,3.1
2018-03-20 00:24:00,1994.0,2.9,-45.43,3.78,44.0,4.1
2018-03-20 00:45:00,1993.7,5.3,-44.66,3.97,0.0,2.7
2018-03-20 01:05:00,1986.3,2.5,-45.36,3.84,308.0,1.4
2018-03-20 01:25:00,1991.7,2.3,-45.51,3.95,44.0,1.7
2018-03-20 01:45:00,1990.8,4.7,-45.34,4.13,0.0,2.7
2018-03-20 02:05:00,1986.0,2.3,-44.86,3.97,0.0,1.4
2018-03-20 02:25:00,1991.7,4.5,-45.34,4.17,88.0,2.0
2018-03-20 02:45:00,1996.3,3.5,-45.3,4.07,176.0,2.7
2018-03-20 03:05:00,1998.3,3.7,-45.12,3.99,308.0,1.4
2018-03-20 03:25:00,2006.6,6.1,-45.74,4.19,330.0,1.7
2018-03-20 03:45:00,1998.2,4.5,-45.33,4.03,44.0,3.1
2018-03-20 04:04:00,1997.4,4.2,-44.98,4.1,0.0,2.4
2018-03-20 04:24:00,1997.9,2.8,-44.91,4.14,66.0,0.7
2018-03-20 04:44:00,2004.7,4.0,-44.91,3.81,0.0,1.0
2018-03-20 05:04:00,2016.1,13.7,-44.23,4.3,44.0,1.7
2018-03-20 05:24:00,2019.0,4.7,-44.27,3.85,0.0,1.7
2018-03-20 05:44:00,2028.9,9.9,-44.51,3.77,0.0,1.4
2018-03-20 06:05:00,2019.7,8.5,-44.92,4.23,286.0,2.4
2018-03-20 06:24:00,2007.2,3.5,-44.43,4.16,308.0,1.7
2018-03-20 06:40:00,1999.4,2.5,-44.8,3.61,264.0,2.7
2018-03-20 08:35:00,1974.6,5.5,-44.39,4.01,44.0,5.1
2018-03-20 08:55:00,1964.7,1.9,-44.9,4.2,132.0,5.4
2018-03-20 09:15:00,1965.7,6.5,-45.33,4.15,0.0,3.1
2018-03-20 09:35:00,1955.0,2.6,-44.96,3.99,44.0,5.1
2018-03-20 09:55:00,1965.2,7.0,-44.44,3.83,88.0,4.1
2018-03-20 10:15:00,1966.0,5.0,-44.23,4.22,88.0,2.0
2018-03-20 10:35:00,1962.9,1.9,-44.97,4.16,0.0,2.4
2018-03-20 10:55:00,1961.9,2.1,-43.99,4.05,88.0,2.4
2018-03-20 11:15:00,1957.2,3.4,-44.65,4.16,88.0,2.0
2018-03-20 11:34:00,1954.7,8.2,-45.34,4.26,110.0,4.1
2018-03-20 11:55:00,1954.2,6.5,-45.08,4.21,0.0,5.4
2018-03-20 12:15:00,1953.7,11.5,-45.51,3.98,0.0,4.8
2018-03-20 12:34:00,1952.4,10.2,-45.75,4.18,88.0,2.4
2018-03-20 12:54:00,1946.9,3.1,-45.89,4.09,0.0,5.1
2018-03-20 13:14:00,1948.3,3.3,-45.86,4.27,0.0,3.4
2018-03-20 13:34:00,1946.9,3.0,-46.23,4.05,110.0,1.7
2018-03-20 13:55:00,1951.3,3.6,-45.83,4.39,264.0,2.0
2018-03-20 14:15:00,1952.3,4.9,-45.49,3.99,44.0,4.4
2018-03-20 14:35:00,1951.0,8.8,-46.12,3.95,132.0,3.1
2018-03-20 14:55:00,1957.3,17.3,-46.16,4.25,308.0,2.7
2018-03-20 15:14:00,1954.0,7.8,-46.04,4.18,88.0,2.4
2018-03-20 15:34:00,1957.5,3.1,-45.76,3.95,0.0,3.1
2018-03-20 15:55:00,1954.4,2.7,-45.95,4.07,44.0,2.7
2018-03-20 16:14:00,1956.5,3.3,-46.21,4.1,88.0,1.4
2018-03-20 16:34:00,1959.7,3.7,-46.48,4.25,44.0,2.7
2018-03-20 16:54:00,1958.5,3.6,-46.12,3.99,286.0,2.7
2018-03-20 17:14:00,1964.2,3.1,-46.22,4.16,264.0,2.4
2018-03-20 17:34:00,1952.1,4.9,-46.59,3.99,0.0,3.7
2018-03-20 17:54:00,1956.3,3.3,-46.42,3.98,286.0,3.4
2018-03-20 18:10:00,1954.2,1.7,-46.34,4.05,0.0,2.7
2018-03-20 20:05:00,1986.1,7.2,-45.92,3.57,308.0,1.7
2018-03-20 20:25:00,1987.4,5.0,-45.87,4.19,44.0,2.7
2018-03-20 20:45:00,1977.8,5.0,-46.03,4.13,0.0,3.1
2018-03-20 21:05:00,1985.1,8.0,-45.72,3.84,0.0,2.4
2018-03-20 21:25:00,1983.8,4.8,-45.51,4.01,44.0,0.7
2018-03-20 21:46:00,1986.2,9.4,-45.4,3.9,264.0,1.7
2018-03-20 22:05:00,2005.1,10.4,-45.99,4.07,0.0,1.4
2018-03-20 22:25:00,1998.2,15.0,-46.06,4.04,0.0,1.4
2018-03-20 22:45:00,1977.3,4.0,-45.38,4.01,44.0,1.4
2018-03-20 23:05:00,1978.3,3.0,-45.4,3.85,44.0,1.0
2018-03-20 23:25:00,1992.5,4.1,-45.24,4.0,22.0,0.3
2018-03-20 23:45:00,1986.5,4.0,-45.94,4.21,44.0,1.4
2018-03-21 00:06:00,2014.9,13.0,-45.02,4.05,264.0,1.0
2018-03-21 00:26:00,2119.7,72.5,-44.96,3.75,286.0,1.0
2018-03-21 00:46:00,2142.1,29.1,-44.81,3.7,264.0,1.0
2018-03-21 01:05:00,2182.8,42.5,-44.59,3.83,308.0,1.0
2018-03-21 01:25:00,2174.2,33.7,-45.01,3.56,308.0,1.0
2018-03-21 01:45:00,2210.4,47.3,-45.34,3.74,264.0,1.4
2018-03-21 02:05:00,2264.2,30.8,-44.18,3.56,0.0,1.0
2018-03-21 02:25:00,2206.2,49.2,-44.81,3.7,264.0,1.0
2018-03-21 02:45:00,2286.3,44.9,-44.14,3.48,308.0,1.0
2018-03-21 03:06:00,2340.4,58.6,-43.99,3.42,308.0,1.0
2018-03-21 03:26:00,2390.9,34.0,-43.93,3.3,264.0,0.7
2018-03-21 03:46:00,2403.5,68.6,-43.48,3.08,308.0,0.3
2018-03-21 04:05:00,2287.1,54.8,-44.26,3.54,264.0,0.7
2018-03-21 04:26:00,2409.2,22.1,-44.08,3.15,308.0,0.7
2018-03-21 04:46:00,2534.6,45.8,-43.73,3.38,264.0,0.7
2018-03-21 05:05:00,2560.9,22.2,-43.89,3.21,220.0,0.7
2018-03-21 05:26:00,2603.0,10.6,-44.14,3.25,44.0,0.3
2018-03-21 05:46:00,2499.6,68.3,-44.56,3.28,308.0,1.7
2018-03-21 06:06:00,2412.5,12.5,-44.47,3.21,132.0,1.4
2018-03-21 06:26:00,2467.6,25.5,-44.5,3.19,308.0,0.7
2018-03-21 06:41:00,2516.0,5.6,-44.35,3.03,198.0,1.0
2018-03-21 08:36:00,2453.5,20.3,-44.9,3.27,264.0,1.4
2018-03-21 08:56:00,2414.7,21.4,-44.25,3.29,220.0,1.7
2018-03-21 09:16:00,2357.0,30.2,-44.27,3.28,198.0,0.7
2018-03-21 09:36:00,2280.7,34.7,-44.28,3.48,308.0,1.4
2018-03-21 09:56:00,2202.6,32.9,-44.7,3.97,264.0,1.4
2018-03-21 10:15:00,2134.2,30.4,-44.53,3.78,264.0,2.0
2018-03-21 10:36:00,2112.2,15.0,-44.54,3.79,308.0,2.0
2018-03-21 10:56:00,2054.2,24.8,-44.91,3.98,264.0,4.1
2018-03-21 11:16:00,2032.3,9.2,-44.61,4.03,264.0,4.4
2018-03-21 11:36:00,2021.5,10.7,-45.03,3.94,308.0,3.1
2018-03-21 11:56:00,2013.0,6.1,-45.18,4.04,264.0,2.4
2018-03-21 12:16:00,2023.3,7.3,-45.16,3.87,0.0,2.4
2018-03-21 12:35:00,2012.8,7.7,-45.28,3.82,264.0,1.4
2018-03-21 12:55:00,2007.4,7.2,-45.18,4.04,220.0,3.4
2018-03-21 13:16:00,2000.6,8.5,-45.3,4.09,286.0,5.1
2018-03-21 13:36:00,2016.2,5.3,-45.02,4.19,176.0,3.4
2018-03-21 13:56:00,2013.2,6.1,-45.35,3.98,88.0,2.4
2018-03-21 14:16:00,2011.6,5.3,-45.45,4.19,198.0,4.1
2018-03-21 14:36:00,2004.0,4.3,-45.71,3.97,308.0,3.4
2018-03-21 14:56:00,2007.5,7.1,-45.42,4.1,308.0,4.1
2018-03-21 15:16:00,2009.8,7.3,-45.66,4.03,308.0,2.7
2018-03-21 15:36:00,2018.5,3.9,-45.64,3.77,264.0,3.7
2018-03-21 15:55:00,2013.8,7.5,-45.81,3.89,286.0,4.4
2018-03-21 16:15:00,2010.6,6.8,-45.72,4.02,0.0,2.7
2018-03-21 16:36:00,2028.1,6.2,-46.43,3.81,220.0,3.1
2018-03-21 16:55:00,2033.9,5.6,-46.33,3.86,308.0,3.1
2018-03-21 17:15:00,2035.8,6.6,-46.3,3.92,264.0,2.7
2018-03-21 17:35:00,2037.2,6.2,-46.1,3.99,220.0,5.8
2018-03-21 17:56:00,2034.1,7.2,-46.09,3.77,264.0,4.8
2018-03-21 18:11:00,2042.9,8.8,-46.15,3.5,264.0,4.4
2018-03-21 20:06:00,2014.9,11.0,-45.31,4.01,264.0,2.7
2018-03-21 20:27:00,2010.9,11.2,-45.0,3.89,264.0,2.7
2018-03-21 20:46:00,2045.0,6.6,-44.47,3.92,264.0,3.4
2018-03-21 21:06:00,2041.0,5.9,-44.95,3.7,264.0,2.4
2018-03-21 21:27:00,2072.3,11.6,-44.97,3.84,264.0,2.0
2018-03-21 21:47:00,2076.3,11.7,-45.12,3.65,220.0,2.4
2018-03-21 22:06:00,2116.6,17.6,-45.1,3.91,308.0,3.1
2018-03-21 22:26:00,2139.1,10.0,-44.86,3.8,264.0,2.4
2018-03-21 22:46:00,2128.9,13.3,-44.5,3.89,264.0,2.4
2018-03-21 23:06:00,2125.3,9.5,-44.64,3.77,264.0,1.7
2018-03-21 23:27:00,2097.7,9.3,-44.28,3.99,308.0,1.7
2018-03-21 23:47:00,2097.6,7.2,-44.54,3.91,330.0,2.0
2018-03-22 00:07:00,2080.0,7.5,-44.73,4.11,308.0,2.7
2018-03-22 00:27:00,2093.8,12.2,-44.39,3.81,242.0,1.4
2018-03-22 00:47:00,2099.1,12.7,-44.55,3.91,264.0,2.4
2018-03-22 01:07:00,2125.7,8.3,-44.14,3.83,308.0,2.4
2018-03-22 01:27:00,2125.4,6.9,-44.27,3.97,264.0,1.7
2018-03-22 01:46:00,2101.7,6.3,-44.63,3.77,308.0,1.4
2018-03-22 02:07:00,2087.0,4.9,-44.32,3.82,264.0,1.7
2018-03-22 02:27:00,2091.2,9.9,-44.48,4.05,308.0,2.0
2018-03-22 02:47:00,2100.2,8.9,-44.07,4.31,264.0,3.1
2018-03-22 03:07:00,2126.5,7.2,-44.27,3.88,220.0,3.4
2018-03-22 03:26:00,2129.0,5.6,-44.51,3.82,264.0,2.7
2018-03-22 03:46:00,2122.2,5.1,-44.06,3.73,264.0,2.0
2018-03-22 04:06:00,2113.1,6.6,-44.3,3.87,264.0,3.4
2018-03-22 04:26:00,2122.6,8.5,-44.59,3.7,0.0,1.4
2018-03-22 04:46:00,2156.8,13.1,-45.02,3.57,264.0,2.0
2018-03-22 05:07:00,2141.9,14.6,-44.86,3.47,264.0,2.7
2018-03-22 05:27:00,2143.5,10.1,-44.8,3.66,220.0,1.7
2018-03-22 05:47:00,2139.3,21.0,-45.14,3.73,264.0,2.0
2018-03-22 06:07:00,2140.5,13.6,-44.55,3.75,264.0,2.4
2018-03-22 06:27:00,2144.4,10.8,-44.61,3.8,242.0,2.0
2018-03-22 06:42:00,2174.9,11.2,-44.59,3.76,264.0,1.4
2018-03-22 08:37:00,2089.4,5.6,-44.66,3.85,176.0,2.0
2018-03-22 08:56:00,2083.4,7.7,-43.82,4.13,264.0,2.4
2018-03-22 09:16:00,2074.5,9.6,-44.0,3.83,44.0,2.0
2018-03-22 09:37:00,2070.2,5.0,-43.95,3.94,132.0,2.0
2018-03-22 09:57:00,2059.8,10.5,-44.11,4.0,0.0,2.7
2018-03-22 10:17:00,2021.1,9.5,-43.88,4.16,264.0,2.0
2018-03-22 10:37:00,2016.0,14.8,-44.35,4.15,308.0,2.0
2018-03-22 10:57:00,2007.8,7.0,-43.9,4.11,264.0,2.4
2018-03-22 11:17:00,1995.8,6.0,-44.29,4.39,264.0,3.7
2018-03-22 11:37:00,2005.5,6.2,-44.13,4.01,132.0,3.4
2018-03-22 11:56:00,1995.9,7.6,-44.54,4.07,220.0,3.4
2018-03-22 12:17:00,1991.2,4.3,-44.56,4.12,264.0,4.4
2018-03-22 12:37:00,2002.0,8.6,-44.33,3.97,220.0,3.7
2018-03-22 12:57:00,2000.7,7.0,-44.04,3.85,0.0,3.4
2018-03-22 13:17:00,1985.9,4.5,-44.31,3.87,44.0,3.1
2018-03-22 13:37:00,1985.6,6.1,-44.65,4.11,264.0,2.7
2018-03-22 13:57:00,1983.4,6.3,-44.61,4.12,220.0,1.4
2018-03-22 14:17:00,1988.6,8.0,-45.51,4.0,308.0,2.0
2018-03-22 14:37:00,1994.3,8.8,-45.09,3.78,220.0,2.7
2018-03-22 14:56:00,1999.7,4.7,-45.25,4.06,286.0,3.7
2018-03-22 15:16:00,1996.6,5.5,-45.58,4.16,220.0,2.7
2018-03-22 15:36:00,1994.6,7.3,-45.71,3.96,264.0,3.7
2018-03-22 15:57:00,1980.1,8.1,-45.56,4.24,308.0,5.8
2018-03-22 16:16:00,1986.7,5.2,-45.6,3.98,308.0,3.4
2018-03-22 16:37:00,1979.3,5.6,-45.52,3.79,308.0,4.1
2018-03-22 16:56:00,1988.7,7.6,-46.05,4.25,0.0,1.4
2018-03-22 17:17:00,1998.1,7.1,-45.95,3.96,220.0,3.1
2018-03-22 17:37:00,2003.1,7.8,-45.68,4.09,176.0,2.0
2018-03-22 17:56:00,2000.4,10.7,-45.64,3.97,264.0,4.4
2018-03-22 18:12:00,2019.7,3.7,-45.91,3.78,198.0,3.1
2018-03-22 20:07:00,1997.7,9.1,-45.88,4.27,308.0,3.1
2018-03-22 20:27:00,1991.3,8.1,-45.7,4.15,308.0,3.7
2018-03-22 20:48:00,1990.7,5.4,-45.3,4.14,88.0,3.1
2018-03-22 21:08:00,1998.8,5.4,-45.53,4.43,264.0,1.4
2018-03-22 21:28:00,1996.5,7.2,-45.57,4.11,264.0,2.0
2018-03-22 21:48:00,2001.3,9.8,-45.13,4.22,286.0,0.7
2018-03-22 22:08:00,2016.2,7.5,-45.35,3.86,220.0,1.4
2018-03-22 22:28:00,2021.1,8.6,-45.43,3.63,198.0,1.7
2018-03-22 22:48:00,2024.6,11.3,-45.02,4.09,0.0,2.4
2018-03-22 23:08:00,2021.2,6.8,-45.08,4.14,132.0,1.4
2018-03-22 23:28:00,2013.9,7.9,-45.59,4.0,154.0,2.7
2018-03-22 23:48:00,2002.6,6.3,-45.7,3.96,198.0,2.0
2018-03-23 00:07:00,2001.1,9.7,-45.52,4.14,220.0,2.4
2018-03-23 00:27:00,1995.7,6.9,-45.64,4.06,220.0,2.0
2018-03-23 00:47:00,1996.1,7.1,-45.45,4.27,264.0,1.0
2018-03-23 01:07:00,1986.1,5.9,-45.35,4.14,220.0,3.1
2018-03-23 01:28:00,1984.7,6.4,-45.52,4.22,264.0,3.7
2018-03-23 01:48:00,1985.3,8.0,-45.78,3.93,0.0,2.7
2018-03-23 02:07:00,1990.1,4.7,-45.28,4.28,220.0,6.5
2018-03-23 02:27:00,1993.8,6.3,-45.39,3.98,220.0,4.4
2018-03-23 02:47:00,1998.3,7.1,-45.62,3.93,220.0,2.4
2018-03-23 03:08:00,1990.1,5.9,-45.37,3.9,264.0,5.4
2018-03-23 03:28:00,1995.0,5.8,-45.33,4.05,220.0,5.1
2018-03-23 03:48:00,1998.0,5.8,-45.69,3.6,220.0,3.1
2018-03-23 04:07:00,2007.7,8.5,-45.83,3.99,176.0,2.4
2018-03-23 04:27:00,2015.1,9.4,-45.41,4.11,88.0,1.7
2018-03-23 04:48:00,2006.0,5.4,-45.96,4.01,198.0,5.4
2018-03-23 05:08:00,2003.7,7.8,-45.67,4.24,132.0,4.4
2018-03-23 05:27:00,2007.3,8.4,-45.55,4.2,220.0,3.7
2018-03-23 05:47:00,2012.0,8.2,-45.78,3.97,132.0,2.4
2018-03-23 06:08:00,2015.0,7.2,-45.27,4.15,330.0,2.7
2018-03-23 06:27:00,2007.7,5.4,-45.33,4.13,176.0,3.4
2018-03-23 06:43:00,2002.8,6.0,-44.59,4.11,176.0,5.1
2018-03-23 08:37:00,2019.3,7.9,-44.4,3.96,220.0,3.4
2018-03-23 08:57:00,1999.2,12.4,-43.82,3.95,264.0,2.7
2018-03-23 09:17:00,1989.6,8.6,-43.93,4.19,220.0,4.1
2018-03-23 09:37:00,1983.6,6.5,-44.24,4.08,220.0,3.1
2018-03-23 09:58:00,1982.1,5.4,-44.62,4.05,264.0,3.1
2018-03-23 10:18:00,1983.5,8.7,-44.7,3.71,220.0,4.4
2018-03-23 10:38:00,1982.0,7.3,-45.02,3.91,220.0,3.1
2018-03-23 10:57:00,1968.2,7.6,-44.8,4.44,220.0,3.1
2018-03-23 11:18:00,1970.5,6.8,-45.24,3.54,220.0,2.7
2018-03-23 11:38:00,1967.6,6.4,-45.27,4.1,220.0,3.1
2018-03-23 11:58:00,1965.2,6.5,-45.56,4.02,220.0,6.1
2018-03-23 12:18:00,1965.7,8.3,-45.86,4.09,242.0,3.4
2018-03-23 12:37:00,1970.9,4.6,-45.36,4.33,264.0,5.1
2018-03-23 12:57:00,1969.1,6.3,-45.23,4.08,264.0,2.7
2018-03-23 13:18:00,1971.6,7.5,-46.03,3.94,264.0,2.0
2018-03-23 13:37:00,1966.8,7.0,-45.65,4.05,220.0,2.7
2018-03-23 13:57:00,1962.9,6.8,-45.83,4.07,308.0,4.1
2018-03-23 14:18:00,1975.2,8.0,-45.67,4.07,242.0,3.7
2018-03-23 14:38:00,1971.5,8.5,-45.91,4.0,0.0,2.0
2018-03-23 14:58:00,1972.6,7.7,-45.84,4.37,176.0,5.4
2018-03-23 15:18:00,1994.1,12.0,-45.61,3.95,176.0,2.4
2018-03-23 15:38:00,1977.6,6.4,-46.03,3.94,0.0,2.4
2018-03-23 15:58:00,1974.6,8.1,-45.62,4.39,264.0,3.7
2018-03-23 16:17:00,1981.5,18.0,-45.46,4.12,176.0,3.7
2018-03-23 16:38:00,1984.0,12.2,-45.18,4.1,88.0,1.0
2018-03-23 16:57:00,2000.4,8.0,-45.42,3.8,132.0,1.4
2018-03-23 17:17:00,2002.5,19.5,-45.39,4.19,220.0,2.4
2018-03-23 17:37:00,2001.8,10.7,-45.79,4.16,220.0,1.7
2018-03-23 17:58:00,2011.7,12.5,-45.15,4.01,132.0,2.7
2018-03-23 18:13:00,2000.1,4.7,-46.11,4.38,132.0,3.1
2018-03-23 20:08:00,2036.3,14.7,-45.6,3.87,176.0,2.4
2018-03-23 20:29:00,2037.3,9.6,-45.45,4.11,132.0,3.1
2018-03-23 20:49:00,2067.9,20.1,-44.86,4.06,176.0,2.0
2018-03-23 21:09:00,2069.1,45.9,-45.0,3.92,242.0,2.0
2018-03-23 21:28:00,2066.1,15.5,-44.93,3.98,176.0,2.4
2018-03-23 21:48:00,2044.8,12.2,-44.9,3.9,88.0,1.4
2018-03-23 22:09:00,2044.5,9.4,-44.35,3.72,220.0,1.4
2018-03-23 22:28:00,2027.4,16.7,-44.96,4.29,220.0,1.0
2018-03-23 22:48:00,2032.3,23.1,-44.67,4.09,132.0,0.3
2018-03-23 23:09:00,2124.1,48.8,-44.73,3.9,176.0,1.0
2018-03-23 23:29:00,2052.8,44.8,-45.25,3.93,0.0,2.4
2018-03-23 23:49:00,1999.2,9.6,-45.07,4.03,88.0,2.4
2018-03-24 00:08:00,2006.4,8.1,-45.02,3.91,44.0,4.1
2018-03-24 00:29:00,2013.4,10.2,-45.01,3.91,110.0,2.4
2018-03-24 00:49:00,2018.8,4.9,-45.07,4.16,132.0,2.7
2018-03-24 01:09:00,2039.5,5.4,-44.86,3.89,88.0,2.7
2018-03-24 01:29:00,2046.1,6.4,-44.89,3.96,132.0,2.7
2018-03-24 01:49:00,2053.6,6.5,-44.69,3.84,88.0,1.4
2018-03-24 02:09:00,2052.1,4.4,-44.68,3.89,88.0,1.7
2018-03-24 02:29:00,2034.9,8.6,-44.55,3.78,132.0,3.4
2018-03-24 02:49:00,2029.9,5.0,-44.41,4.09,132.0,3.4
2018-03-24 03:09:00,2031.7,6.9,-45.41,3.94,132.0,2.4
2018-03-24 03:28:00,2038.5,3.0,-44.6,4.08,110.0,2.7
2018-03-24 03:48:00,2035.3,7.9,-44.9,4.13,88.0,1.7
2018-03-24 04:08:00,2036.4,7.5,-44.91,3.94,176.0,3.4
2018-03-24 04:28:00,2040.3,18.2,-44.62,4.09,132.0,2.4
2018-03-24 04:48:00,2058.4,8.9,-44.97,3.85,88.0,1.4
2018-03-24 05:09:00,2044.9,9.7,-44.77,4.18,88.0,1.4
2018-03-24 05:28:00,2065.0,21.6,-44.92,3.7,66.0,3.1
2018-03-24 05:48:00,2064.1,36.8,-44.92,3.81,88.0,4.1
2018-03-24 06:09:00,2046.4,8.8,-45.12,4.08,22.0,2.7
2018-03-24 06:29:00,2051.8,11.3,-45.04,3.92,88.0,3.1
2018-03-24 06:44:00,2073.7,10.6,-45.71,3.67,88.0,2.0
2018-03-24 08:38:00,2049.3,6.5,-45.44,4.01,88.0,1.4
2018-03-24 08:58:00,2038.3,4.7,-45.22,3.86,88.0,2.0
2018-03-24 09:18:00,2034.2,7.0,-44.97,4.18,44.0,1.4
2018-03-24 09:38:00,2041.8,13.8,-45.36,3.89,88.0,2.0
2018-03-24 09:58:00,2032.5,10.0,-45.27,4.12,88.0,2.0
2018-03-24 10:19:00,2035.2,8.0,-45.0,3.95,0.0,3.1
2018-03-24 10:38:00,2053.1,36.3,-44.77,3.97,44.0,1.0
2018-03-24 10:59:00,2090.4,40.7,-44.68,3.88,132.0,1.4
2018-03-24 11:19:00,2019.5,6.8,-45.45,4.21,88.0,2.7
2018-03-24 11:39:00,2056.3,43.6,-44.87,4.1,88.0,0.3
2018-03-24 11:59:00,2094.7,53.8,-44.91,3.98,132.0,0.7
2018-03-24 12:18:00,2056.5,87.1,-45.65,4.13,44.0,1.4
2018-03-24 12:39:00,2056.6,11.6,-45.44,4.2,198.0,1.0
2018-03-24 12:59:00,2049.6,6.8,-45.24,4.06,88.0,0.7
2018-03-24 13:19:00,2058.7,21.0,-45.46,3.93,264.0,0.7
2018-03-24 13:39:00,2108.9,78.0,-44.83,3.89,220.0,0.3
2018-03-24 13:59:00,2077.5,63.1,-45.77,3.47,88.0,1.4
2018-03-24 14:18:00,2065.5,11.9,-45.48,3.83,0.0,0.3
2018-03-24 14:39:00,2061.8,6.6,-45.42,3.88,264.0,1.0
2018-03-24 14:59:00,2063.6,8.0,-45.66,4.18,132.0,0.3
2018-03-24 15:18:00,2055.6,3.2,-45.65,3.82,176.0,0.7
2018-03-24 15:39:00,2067.5,8.1,-45.91,4.0,44.0,0.7
2018-03-24 15:58:00,2068.2,6.8,-45.23,3.82,308.0,0.7
2018-03-24 16:18:00,2081.7,11.1,-45.43,3.82,286.0,1.0
2018-03-24 16:38:00,2070.8,3.7,-45.63,3.94,0.0,0.3
2018-03-24 16:58:00,2073.4,4.1,-45.99,3.83,308.0,1.0
2018-03-24 17:19:00,2058.8,5.7,-45.87,4.02,308.0,1.4
2018-03-24 17:39:00,2052.9,8.2,-45.38,4.01,308.0,2.0
2018-03-24 17:58:00,2057.2,4.0,-45.59,3.92,22.0,1.4
2018-03-24 18:14:00,2055.4,5.6,-45.96,3.51,0.0,2.7
2018-03-24 20:09:00,2079.3,22.4,-45.63,3.77,44.0,1.0
2018-03-24 20:30:00,2084.7,11.2,-45.15,3.86,44.0,1.0
2018-03-24 20:50:00,2120.1,32.2,-44.93,3.8,0.0,1.0
2018-03-24 21:10:00,2150.8,46.6,-45.03,3.86,44.0,1.0
2018-03-24 21:29:00,2114.7,33.8,-45.05,3.66,88.0,1.0
2018-03-24 21:49:00,2092.2,47.7,-45.6,3.98,44.0,0.3
2018-03-24 22:10:00,2089.9,17.3,-45.39,4.06,88.0,1.4
2018-03-24 22:29:00,2111.4,6.0,-45.23,3.85,88.0,2.4
2018-03-24 22:50:00,2123.4,8.9,-45.46,3.66,88.0,1.0
2018-03-24 23:10:00,2131.7,5.6,-45.62,3.82,132.0,1.0
2018-03-24 23:29:00,2082.7,11.0,-45.7,3.97,242.0,1.4
2018-03-24 23:50:00,2098.2,11.3,-45.06,4.04,0.0,2.0
2018-03-25 00:10:00,2119.5,11.2,-45.79,3.65,44.0,0.7
2018-03-25 00:30:00,2106.7,13.5,-45.96,4.21,22.0,0.3
2018-03-25 00:50:00,2100.5,9.9,-45.98,3.86,308.0,1.0
2018-03-25 01:10:00,2136.9,7.2,-45.79,3.8,308.0,1.0
2018-03-25 01:29:00,2149.6,3.5,-45.56,3.65,0.0,1.0
2018-03-25 01:49:00,2157.4,3.3,-45.73,3.76,88.0,0.7
2018-03-25 02:10:00,2150.0,4.6,-45.65,3.56,132.0,1.0
2018-03-25 02:30:00,2138.7,6.0,-45.3,3.67,308.0,1.4
2018-03-25 02:49:00,2126.6,6.7,-45.48,3.82,88.0,1.4
2018-03-25 03:10:00,2123.7,5.1,-45.98,3.75,88.0,0.3
2018-03-25 03:30:00,2111.5,7.3,-45.48,4.05,88.0,1.0
2018-03-25 03:50:00,2114.4,7.0,-45.86,3.98,44.0,0.7
2018-03-25 04:10:00,2118.9,5.5,-45.9,3.59,264.0,1.7
2018-03-25 04:30:00,2111.4,4.3,-46.13,4.09,264.0,1.0
2018-03-25 04:49:00,2115.0,7.5,-46.4,3.78,0.0,0.7
2018-03-25 05:09:00,2103.0,2.3,-46.4,4.07,0.0,2.4
2018-03-25 05:29:00,2100.6,3.2,-46.41,3.6,0.0,1.4
2018-03-25 05:49:00,2104.2,5.0,-45.66,4.01,220.0,1.7
2018-03-25 06:09:00,2102.9,5.6,-46.58,3.91,264.0,2.4
2018-03-25 06:30:00,2096.4,2.7,-46.14,3.92,0.0,2.4
2018-03-25 06:45:00,2096.1,4.0,-45.75,3.71,44.0,1.4
2018-03-25 08:39:00,2063.4,8.4,-46.01,3.89,330.0,1.4
2018-03-25 08:59:00,2066.5,5.1,-46.03,3.71,44.0,1.7
2018-03-25 09:20:00,2059.8,2.7,-46.03,3.94,132.0,2.4
2018-03-25 09:40:00,2057.2,6.3,-46.04,3.88,264.0,0.7
2018-03-25 09:59:00,2058.8,10.0,-45.73,4.03,132.0,2.0
2018-03-25 10:19:00,2057.3,8.3,-45.06,3.65,0.0,1.4
2018-03-25 10:39:00,2048.2,5.6,-45.71,3.81,308.0,2.4
2018-03-25 10:59:00,2054.3,7.7,-45.42,3.95,264.0,0.7
2018-03-25 11:19:00,2037.5,4.5,-45.84,4.02,0.0,1.4
2018-03-25 11:39:00,2023.8,6.0,-46.26,4.14,0.0,2.0
2018-03-25 11:59:00,2021.5,7.6,-45.46,3.85,308.0,1.4
2018-03-25 12:19:00,2006.7,5.0,-45.99,4.08,286.0,0.7
2018-03-25 12:40:00,2001.9,3.7,-45.7,4.06,132.0,2.0
2018-03-25 13:00:00,1996.8,6.9,-45.49,3.88,88.0,0.7
2018-03-25 13:19:00,1979.4,7.6,-46.21,3.92,330.0,2.7
2018-03-25 13:39:00,1972.9,5.1,-46.11,3.99,44.0,2.7
2018-03-25 13:59:00,1974.7,3.6,-46.05,4.05,308.0,2.0
2018-03-25 14:19:00,1973.3,4.0,-45.64,3.96,132.0,2.4
2018-03-25 14:39:00,1965.8,2.3,-46.44,4.18,0.0,2.4
2018-03-25 14:59:00,1967.2,2.9,-46.42,3.83,0.0,2.0
2018-03-25 15:20:00,1969.7,3.1,-46.48,3.86,44.0,2.0
2018-03-25 15:40:00,1973.2,5.2,-46.63,4.14,264.0,2.0
2018-03-25 16:00:00,1979.6,6.7,-46.9,4.22,176.0,1.4
2018-03-25 16:19:00,1982.8,8.1,-46.61,3.93,132.0,1.7
2018-03-25 16:40:00,2017.1,21.4,-46.15,4.16,44.0,2.0
2018-03-25 16:59:00,1986.7,8.4,-46.65,3.67,264.0,0.7
2018-03-25 17:19:00,1995.1,5.7,-46.57,4.23,0.0,1.7
2018-03-25 17:40:00,2001.2,5.9,-46.62,3.99,44.0,0.7
2018-03-25 17:59:00,2004.4,6.8,-46.97,3.91,44.0,0.7
2018-03-25 18:15:00,2003.8,4.6,-46.77,4.22,22.0,1.0
2018-03-25 20:10:00,2059.5,19.6,-46.33,3.7,308.0,0.7
2018-03-25 20:30:00,2072.6,18.6,-45.53,3.85,308.0,1.0
2018-03-25 20:51:00,2226.8,88.1,-45.52,3.8,264.0,1.0
2018-03-25 21:11:00,2289.6,22.6,-44.89,3.53,308.0,1.4
2018-03-25 21:31:00,2270.6,36.9,-45.1,3.52,308.0,1.0
2018-03-25 21:51:00,2317.2,35.8,-44.75,3.38,264.0,1.4
2018-03-25 22:11:00,2314.2,22.8,-45.0,3.26,308.0,1.0
2018-03-25 22:30:00,2324.4,31.6,-45.12,3.43,308.0,1.0
2018-03-25 22:50:00,2414.2,20.6,-44.24,3.31,286.0,1.0
2018-03-25 23:10:00,2428.8,46.3,-44.26,3.48,308.0,0.3
2018-03-25 23:30:00,2399.7,44.7,-44.79,3.4,308.0,0.3
2018-03-25 23:50:00,2316.0,86.0,-45.21,3.53,132.0,0.7
2018-03-26 00:10:00,2157.1,34.9,-45.96,3.88,308.0,1.0
2018-03-26 00:30:00,2077.4,9.2,-46.28,3.97,0.0,1.4
2018-03-26 00:51:00,2072.0,7.3,-46.85,3.61,264.0,1.4
2018-03-26 01:10:00,2049.0,12.5,-46.83,4.04,0.0,1.7
2018-03-26 01:30:00,2054.5,7.9,-46.84,3.68,44.0,1.0
2018-03-26 01:50:00,2053.2,3.6,-47.31,3.87,308.0,1.4
2018-03-26 02:11:00,2053.5,9.1,-46.73,4.05,308.0,1.7
2018-03-26 02:31:00,2064.4,9.3,-46.94,4.06,308.0,1.4
2018-03-26 02:51:00,2066.4,11.3,-46.83,4.12,0.0,1.4
2018-03-26 03:10:00,2064.5,9.3,-46.98,3.81,286.0,0.3
2018-03-26 03:30:00,2098.7,16.7,-46.83,4.05,308.0,1.0
2018-03-26 03:50:00,2061.7,6.4,-46.99,4.12,308.0,2.0
2018-03-26 04:10:00,2067.9,10.4,-46.52,3.85,0.0,1.0
2018-03-26 04:30:00,2059.0,9.8,-47.23,3.84,308.0,1.0
2018-03-26 04:51:00,2079.0,23.6,-47.06,3.9,0.0,1.4
2018-03-26 05:11:00,2102.3,21.7,-46.66,3.55,264.0,1.4
2018-03-26 05:31:00,2081.6,20.2,-46.43,3.71,264.0,1.4
2018-03-26 05:51:00,2090.2,22.8,-46.32,4.05,176.0,1.4
2018-03-26 06:10:00,2080.9,29.8,-46.64,3.84,308.0,1.4
2018-03-26 06:30:00,2129.2,25.7,-46.84,3.82,308.0,0.7
2018-03-26 06:46:00,2116.6,16.1,-46.76,3.5,308.0,1.0
2018-03-26 08:42:00,2060.6,12.4,-46.62,3.73,308.0,1.4
2018-03-26 09:02:00,2052.6,12.5,-46.78,3.59,0.0,0.3
2018-03-26 09:21:00,2019.8,18.0,-47.36,4.05,0.0,1.7
2018-03-26 09:41:00,1999.4,19.9,-46.44,4.13,264.0,1.0
2018-03-26 10:01:00,1978.4,4.2,-47.08,3.67,264.0,0.3
2018-03-26 10:21:00,1995.3,6.6,-46.71,4.21,264.0,1.4
2018-03-26 10:42:00,2002.1,8.7,-46.56,3.94,220.0,1.7
2018-03-26 11:02:00,1996.7,8.7,-46.76,4.07,44.0,0.7
2018-03-26 11:22:00,1985.4,11.0,-47.0,4.05,220.0,0.7
2018-03-26 11:42:00,1990.6,7.9,-47.04,4.03,264.0,1.0
2018-03-26 12:02:00,1996.4,9.6,-47.04,3.93,286.0,2.7
2018-03-26 12:22:00,1985.6,10.2,-47.11,4.17,264.0,1.7
2018-03-26 12:41:00,2010.1,11.7,-47.0,3.8,286.0,1.7
2018-03-26 13:01:00,1998.5,5.1,-47.22,3.79,308.0,2.4
2018-03-26 13:21:00,2008.7,12.0,-46.92,4.16,0.0,1.7
2018-03-26 13:41:00,1994.3,7.4,-46.75,3.92,220.0,3.1
2018-03-26 14:01:00,1993.4,7.6,-47.07,3.83,308.0,3.4
2018-03-26 14:21:00,1992.5,11.6,-46.47,4.12,264.0,2.7
2018-03-26 14:41:00,1990.3,6.6,-46.69,4.28,88.0,1.7
2018-03-26 15:01:00,1983.5,6.3,-47.17,4.19,154.0,2.0
2018-03-26 15:21:00,1995.3,8.4,-47.0,4.19,308.0,2.0
2018-03-26 15:41:00,1989.7,7.6,-47.18,3.96,220.0,1.4
2018-03-26 16:01:00,1989.7,7.1,-46.75,4.01,264.0,0.7
2018-03-26 16:22:00,1991.9,6.1,-47.23,4.08,264.0,0.3
2018-03-26 16:42:00,1984.7,7.8,-47.37,4.12,0.0,1.4
2018-03-26 17:02:00,1988.7,10.7,-47.16,3.98,264.0,1.7
2018-03-26 17:21:00,2014.1,8.4,-47.23,3.86,264.0,2.4
2018-03-26 17:41:00,2005.5,11.3,-47.21,4.05,308.0,1.7
2018-03-26 18:01:00,2021.3,12.3,-46.95,3.89,220.0,1.7
2018-03-26 18:17:00,2031.7,8.0,-46.53,3.89,0.0,1.0
2018-03-26 20:12:00,2096.4,10.6,-46.77,4.06,220.0,3.4
2018-03-26 20:32:00,2089.5,12.7,-46.63,3.66,264.0,1.7
2018-03-26 20:52:00,2065.7,11.4,-46.51,4.12,264.0,2.0
2018-03-26 21:12:00,2056.3,9.4,-46.54,4.21,286.0,1.0
2018-03-26 21:32:00,2068.4,8.4,-46.13,3.68,264.0,1.7
2018-03-26 21:52:00,2075.9,7.4,-46.35,3.91,264.0,1.4
2018-03-26 22:12:00,2088.4,12.2,-45.68,3.92,264.0,1.0
2018-03-26 22:32:00,2075.7,8.3,-46.13,4.15,264.0,2.0
2018-03-26 22:52:00,2083.2,12.8,-46.09,3.79,176.0,1.7
2018-03-26 23:12:00,2100.1,13.1,-45.96,3.82,264.0,0.7
2018-03-26 23:31:00,2091.9,13.7,-46.24,4.19,220.0,2.0
2018-03-26 23:51:00,2076.9,10.8,-45.91,3.78,220.0,1.4
2018-03-27 00:11:00,2079.5,8.5,-46.4,3.9,220.0,1.0
2018-03-27 00:32:00,2112.3,12.0,-46.23,3.74,220.0,1.7
2018-03-27 00:52:00,2116.9,11.3,-45.82,4.08,264.0,2.0
2018-03-27 01:11:00,2128.4,10.1,-45.95,3.83,220.0,2.4
2018-03-27 01:31:00,2160.6,11.2,-46.27,3.96,176.0,0.3
2018-03-27 01:52:00,2085.7,32.3,-46.23,3.76,220.0,1.4
2018-03-27 02:11:00,2008.7,7.9,-46.38,3.69,176.0,2.4
2018-03-27 02:31:00,2020.4,8.9,-46.08,3.9,0.0,1.7
2018-03-27 02:52:00,2043.5,15.6,-46.47,3.86,220.0,2.4
2018-03-27 03:12:00,2048.9,14.2,-46.41,3.89,110.0,2.4
2018-03-27 03:32:00,2024.3,10.7,-46.05,3.95,176.0,2.7
2018-03-27 03:52:00,2045.0,21.6,-45.89,4.03,220.0,3.7
2018-03-27 04:11:00,2046.9,20.8,-46.31,4.02,176.0,3.7
2018-03-27 04:32:00,2059.5,28.7,-46.16,3.96,132.0,3.7
2018-03-27 04:51:00,2031.4,30.0,-46.09,4.11,132.0,4.8
2018-03-27 05:12:00,2060.0,34.8,-45.89,4.01,132.0,3.7
2018-03-27 05:32:00,2060.2,37.0,-46.26,4.0,176.0,3.1
2018-03-27 05:51:00,2038.6,30.4,-46.18,4.05,176.0,2.7
2018-03-27 06:12:00,2043.0,38.0,-46.14,3.92,176.0,3.4
2018-03-27 06:32:00,2058.2,25.5,-46.24,3.77,220.0,2.4
2018-03-27 06:47:00,2062.3,15.3,-46.64,3.82,154.0,1.7
2018-03-27 08:41:00,2082.8,14.7,-45.84,3.82,176.0,0.3
2018-03-27 09:01:00,2082.1,8.0,-45.73,3.81,198.0,2.0
2018-03-27 09:21:00,2095.3,13.9,-45.21,3.85,44.0,1.0
2018-03-27 09:41:00,2112.3,7.9,-45.09,3.99,132.0,0.7
2018-03-27 10:01:00,2095.9,17.6,-44.7,3.77,220.0,1.7
2018-03-27 10:21:00,2087.8,6.9,-44.96,4.05,264.0,0.3
2018-03-27 10:42:00,2061.8,7.3,-44.33,3.95,88.0,2.4
2018-03-27 11:01:00,2075.0,12.7,-44.7,3.62,264.0,2.0
2018-03-27 11:21:00,2054.7,10.3,-44.37,3.93,220.0,1.7
2018-03-27 11:41:00,2033.7,17.5,-44.24,3.77,176.0,1.4
2018-03-27 12:01:00,2017.9,12.1,-44.01,3.98,264.0,1.0
2018-03-27 12:21:00,2021.2,7.7,-44.37,3.9,264.0,2.0
2018-03-27 12:42:00,2024.8,11.2,-43.91,3.93,176.0,2.0
2018-03-27 13:02:00,2002.2,6.7,-43.96,4.35,264.0,3.4
2018-03-27 13:21:00,1985.8,8.5,-44.18,4.27,308.0,2.7
2018-03-27 13:41:00,1970.9,8.5,-43.87,4.3,220.0,3.4
2018-03-27 14:01:00,1962.2,4.1,-43.98,3.95,308.0,4.4
2018-03-27 14:22:00,1973.4,5.6,-43.86,4.11,308.0,3.4
2018-03-27 14:41:00,1969.1,6.4,-44.31,4.26,264.0,1.0
2018-03-27 15:01:00,1957.6,4.8,-43.75,4.14,264.0,4.8
2018-03-27 15:21:00,1969.8,5.7,-44.54,4.06,308.0,3.7
2018-03-27 15:42:00,1966.6,5.7,-44.1,4.01,308.0,4.8
2018-03-27 16:02:00,1968.9,6.9,-44.81,4.15,308.0,4.1
2018-03-27 16:21:00,1972.4,6.2,-44.56,4.12,308.0,3.1
2018-03-27 16:42:00,1969.8,5.3,-45.39,4.03,264.0,4.1
2018-03-27 17:02:00,1978.3,5.6,-44.93,3.88,264.0,4.8
2018-03-27 17:21:00,1976.8,4.8,-45.17,3.77,308.0,2.7
2018-03-27 17:41:00,1983.1,6.2,-45.69,3.96,308.0,4.1
2018-03-27 18:01:00,1975.2,3.3,-46.17,4.06,264.0,4.1
2018-03-27 18:17:00,1974.6,2.2,-45.63,4.34,308.0,5.8
2018-03-27 20:12:00,2012.9,7.4,-46.05,3.85,264.0,3.1
2018-03-27 20:33:00,2020.2,7.4,-46.39,3.78,264.0,3.7
2018-03-27 20:53:00,2015.4,12.8,-45.88,4.22,264.0,3.4
2018-03-27 21:12:00,2048.1,13.4,-45.73,3.79,264.0,3.1
2018-03-27 21:32:00,2061.4,6.5,-45.26,4.18,264.0,2.4
2018-03-27 21:52:00,2062.9,7.0,-46.13,3.79,264.0,3.4
2018-03-27 22:13:00,2052.4,6.7,-45.95,3.88,264.0,2.0
2018-03-27 22:33:00,2048.3,5.5,-45.61,3.64,308.0,1.7
2018-03-27 22:52:00,2042.4,7.2,-45.8,3.86,308.0,1.7
2018-03-27 23:12:00,2049.7,9.9,-46.01,3.93,286.0,3.4
2018-03-27 23:33:00,2060.3,14.9,-45.78,3.76,308.0,0.3
2018-03-27 23:53:00,2062.5,7.7,-45.33,3.65,264.0,1.7
2018-03-28 00:13:00,2058.1,5.4,-45.37,3.74,264.0,1.7
2018-03-28 00:33:00,2065.2,5.8,-45.49,3.75,264.0,0.7
2018-03-28 00:52:00,2061.9,9.9,-46.06,3.85,220.0,1.4
2018-03-28 01:12:00,2060.9,4.1,-45.8,3.96,132.0,1.0
2018-03-28 01:32:00,2039.4,7.3,-45.81,3.77,308.0,2.4
2018-03-28 01:53:00,2035.3,4.9,-45.82,3.92,264.0,2.4
2018-03-28 02:12:00,2028.6,6.4,-45.32,4.07,264.0,1.4
2018-03-28 02:32:00,2035.6,12.7,-46.5,4.01,220.0,1.0
2018-03-28 02:53:00,2050.3,6.1,-45.98,4.09,308.0,1.0
2018-03-28 03:13:00,2050.0,9.1,-46.31,3.97,308.0,1.0
2018-03-28 03:32:00,2076.2,11.5,-46.22,3.86,88.0,0.3
2018-03-28 03:52:00,2082.1,10.0,-45.94,3.78,308.0,1.0
2018-03-28 04:13:00,2097.7,7.4,-45.96,3.81,308.0,1.0
2018-03-28 04:33:00,2092.7,10.8,-46.36,3.96,264.0,0.7
2018-03-28 04:52:00,2100.0,7.5,-45.74,3.91,220.0,0.7
2018-03-28 05:12:00,2100.8,9.6,-46.05,3.6,264.0,0.3
2018-03-28 05:33:00,2126.6,14.8,-45.95,4.03,264.0,0.7
2018-03-28 05:53:00,2091.2,8.7,-46.35,3.97,220.0,1.0
2018-03-28 06:13:00,2091.5,11.7,-45.52,3.74,176.0,1.0
2018-03-28 06:32:00,2010.9,22.7,-46.3,3.95,0.0,0.7
2018-03-28 06:48:00,1996.9,8.8,-46.02,3.85,286.0,0.7
2018-03-28 08:42:00,2019.5,15.4,-46.34,4.11,264.0,1.0
2018-03-28 09:03:00,2046.1,49.8,-45.81,3.74,132.0,1.7
2018-03-28 09:23:00,2072.2,40.4,-45.68,4.06,176.0,0.7
2018-03-28 09:43:00,2092.3,84.0,-45.68,3.85,176.0,0.7
2018-03-28 10:02:00,2048.3,12.5,-46.38,3.76,220.0,1.0
2018-03-28 10:22:00,2038.4,11.0,-45.62,4.14,242.0,1.0
2018-03-28 10:42:00,2027.2,6.1,-45.49,4.1,0.0,1.4
2018-03-28 11:02:00,2036.8,8.7,-46.4,3.93,264.0,1.7
2018-03-28 11:22:00,2034.6,13.0,-46.19,3.83,264.0,2.4
2018-03-28 11:43:00,2024.7,16.5,-45.99,4.29,286.0,1.7
2018-03-28 12:03:00,2010.0,8.1,-46.29,3.94,264.0,2.4
2018-03-28 12:23:00,2006.8,4.7,-46.29,3.72,308.0,2.4
2018-03-28 12:43:00,2006.2,3.4,-46.62,4.01,308.0,2.7
2018-03-28 13:03:00,2011.0,9.3,-46.22,3.95,220.0,2.0
2018-03-28 13:22:00,2020.7,14.8,-46.37,3.84,0.0,2.7
2018-03-28 13:42:00,2039.7,6.6,-45.81,4.04,264.0,2.7
2018-03-28 14:03:00,2021.0,12.7,-46.14,4.07,308.0,4.1
2018-03-28 14:22:00,2009.4,5.4,-46.12,4.16,220.0,1.4
2018-03-28 14:43:00,2001.9,7.9,-46.09,3.96,308.0,1.4
2018-03-28 15:03:00,1996.1,7.0,-46.21,3.74,176.0,3.7
2018-03-28 15:22:00,1982.3,4.3,-46.44,4.07,264.0,2.7
2018-03-28 15:41:00,1991.4,4.5,-46.55,4.19,308.0,2.4
2018-03-28 16:03:00,nan,nan,nan,nan,0.0,2.0
2018-03-28 16:22:00,nan,nan,nan,nan,264.0,3.1
2018-03-28 16:42:00,nan,nan,nan,nan,308.0,3.1
2018-03-28 17:07:00,1993.0,6.1,-46.31,3.75,264.0,2.4
2018-03-28 17:23:00,1989.3,8.0,-46.65,3.91,286.0,2.7
2018-03-28 17:42:00,2009.4,22.9,-46.03,4.2,220.0,2.0
2018-03-28 18:02:00,1997.3,20.2,-46.51,3.99,308.0,0.7
2018-03-28 18:18:00,2002.2,10.5,-45.94,4.08,264.0,2.0
2018-03-28 20:14:00,2109.0,10.9,-45.75,3.6,0.0,0.3
2018-03-28 20:34:00,2086.3,12.5,-45.7,3.68,220.0,2.7
2018-03-28 20:54:00,2089.9,12.9,-46.06,4.11,264.0,1.0
2018-03-28 21:14:00,2111.8,5.9,-45.47,3.77,264.0,1.0
2018-03-28 21:33:00,2120.7,9.1,-45.51,3.92,308.0,1.4
2018-03-28 21:53:00,2118.3,22.3,-45.52,3.81,176.0,0.3
2018-03-28 22:13:00,2059.6,13.5,-45.6,3.73,264.0,1.7
2018-03-28 22:33:00,2061.6,11.2,-45.56,3.68,88.0,1.0
2018-03-28 22:54:00,2078.4,7.2,-45.71,4.1,264.0,2.0
2018-03-28 23:13:00,2077.4,10.7,-45.84,3.75,264.0,0.7
2018-03-28 23:33:00,2076.2,5.9,-45.94,3.92,264.0,2.0
2018-03-28 23:54:00,2081.7,10.5,-45.92,3.78,308.0,1.4
2018-03-29 00:14:00,2089.5,5.7,-45.94,4.08,220.0,1.7
2018-03-29 00:34:00,2097.4,6.9,-46.14,3.87,132.0,1.0
2018-03-29 00:54:00,2088.0,7.5,-46.22,3.91,176.0,1.0
2018-03-29 01:14:00,2075.9,8.3,-45.78,3.96,0.0,1.7
2018-03-29 01:33:00,2069.2,8.2,-45.7,4.1,198.0,1.0
2018-03-29 01:53:00,2078.7,9.2,-46.06,3.86,308.0,0.3
2018-03-29 02:13:00,2059.3,12.4,-46.06,3.85,220.0,1.7
2018-03-29 02:33:00,2070.3,11.5,-46.35,3.97,220.0,0.7
2018-03-29 02:53:00,2067.2,11.9,-46.26,3.8,264.0,1.4
2018-03-29 03:13:00,2068.5,8.3,-46.29,3.6,286.0,1.7
2018-03-29 03:33:00,2097.9,14.1,-46.2,4.12,220.0,1.4
2018-03-29 03:54:00,2124.9,6.5,-46.71,3.78,44.0,1.0
2018-03-29 04:14:00,2145.5,10.3,-46.23,3.51,176.0,0.3
2018-03-29 04:33:00,2155.2,13.6,-45.82,3.7,176.0,0.3
2018-03-29 04:53:00,2162.9,22.8,-45.9,3.77,176.0,1.4
2018-03-29 05:14:00,2180.7,14.9,-45.32,3.8,0.0,0.0
2018-03-29 05:33:00,2179.5,20.9,-45.45,3.76,132.0,0.7
2018-03-29 05:53:00,2304.9,54.8,-46.45,3.44,88.0,1.4
2018-03-29 06:13:00,2343.2,30.1,-46.41,3.49,88.0,2.4
2018-03-29 06:33:00,2346.5,32.2,-46.77,3.48,44.0,1.0
2018-03-29 06:49:00,2426.6,45.9,-46.99,3.27,132.0,2.4
2018-03-29 08:43:00,2047.3,18.1,-46.65,4.31,0.0,2.0
2018-03-29 09:04:00,2047.2,37.5,-46.36,4.1,176.0,1.0
2018-03-29 09:23:00,2056.4,34.0,-46.3,3.77,88.0,2.7
2018-03-29 09:43:00,2019.4,25.7,-46.08,3.99,198.0,3.4
2018-03-29 10:04:00,2004.1,20.8,-46.3,4.12,176.0,5.4
2018-03-29 10:24:00,2021.9,30.9,-45.89,3.92,132.0,2.4
2018-03-29 10:44:00,2004.5,8.5,-46.23,3.73,176.0,4.1
2018-03-29 11:04:00,1995.9,3.8,-46.64,3.99,176.0,3.7
2018-03-29 11:23:00,2025.5,29.8,-46.24,4.04,132.0,3.7
2018-03-29 11:43:00,2020.4,23.2,-46.21,4.08,176.0,3.4
2018-03-29 12:03:00,2010.2,18.2,-46.14,3.69,220.0,2.7
2018-03-29 12:24:00,2028.4,40.4,-45.83,3.98,132.0,1.7
2018-03-29 12:44:00,2051.5,31.3,-46.0,4.17,88.0,2.4
2018-03-29 13:03:00,2022.1,33.4,-45.77,3.82,176.0,5.4
2018-03-29 13:23:00,2009.1,21.1,-46.04,3.85,176.0,3.4
2018-03-29 13:43:00,2018.1,16.2,-45.95,4.43,176.0,5.4
2018-03-29 14:04:00,2025.5,10.0,-45.68,3.84,132.0,3.1
2018-03-29 14:24:00,2011.0,9.1,-45.74,4.06,132.0,6.1
2018-03-29 14:44:00,2000.8,13.7,-45.85,3.99,176.0,4.4
2018-03-29 15:04:00,2021.3,30.7,-46.17,4.16,132.0,3.1
2018-03-29 15:24:00,1995.5,19.9,-46.35,4.12,44.0,3.1
2018-03-29 15:43:00,2001.9,6.5,-45.34,3.71,44.0,2.4
2018-03-29 16:03:00,2008.8,3.6,-45.91,4.11,88.0,2.4
2018-03-29 16:23:00,2058.6,37.1,-45.54,4.06,88.0,2.4
2018-03-29 16:44:00,2094.4,43.6,-45.11,3.79,176.0,3.4
2018-03-29 17:03:00,2078.4,27.2,-45.64,3.8,154.0,3.4
2018-03-29 17:24:00,2043.5,8.3,-45.29,3.93,176.0,2.7
2018-03-29 17:44:00,2043.8,10.5,-45.99,3.98,132.0,4.4
2018-03-29 18:04:00,2048.9,12.0,-45.31,3.88,132.0,2.4
2018-03-29 18:19:00,2044.1,11.0,-46.7,4.04,220.0,2.7
2018-03-29 20:15:00,2117.4,21.7,-46.54,4.0,220.0,2.0
2018-03-29 20:34:00,2073.2,17.6,-46.18,3.9,132.0,3.4
2018-03-29 20:54:00,2078.3,14.3,-45.92,3.94,88.0,2.0
2018-03-29 21:15:00,2069.8,12.9,-46.1,4.09,88.0,2.0
2018-03-29 21:34:00,2121.8,23.8,-46.32,3.59,220.0,1.7
2018-03-29 21:55:00,2081.7,19.0,-46.34,4.23,132.0,3.1
2018-03-29 22:14:00,2081.4,38.2,-45.17,3.98,132.0,2.4
2018-03-29 22:34:00,2062.6,26.2,-45.66,3.72,176.0,2.7
2018-03-29 22:55:00,2067.1,29.3,-45.61,3.89,132.0,2.0
2018-03-29 23:14:00,2119.2,31.4,-45.57,3.69,88.0,3.4
2018-03-29 23:34:00,2102.5,41.9,-45.44,4.0,132.0,1.4
2018-03-29 23:54:00,2097.2,35.2,-45.45,3.82,176.0,1.4
2018-03-30 00:14:00,2059.0,24.6,-45.79,4.07,176.0,1.4
2018-03-30 00:34:00,2058.1,25.2,-45.86,4.12,132.0,0.7
2018-03-30 00:54:00,2050.2,19.2,-45.78,4.04,132.0,2.7
2018-03-30 01:14:00,2067.4,37.9,-45.72,3.97,176.0,2.7
2018-03-30 01:34:00,2044.0,12.5,-45.4,3.97,176.0,1.7
2018-03-30 01:54:00,2065.1,26.8,-45.43,3.95,220.0,1.4
2018-03-30 02:15:00,2075.0,13.0,-45.61,3.82,0.0,1.7
2018-03-30 02:35:00,2106.9,48.1,-45.34,3.89,132.0,0.7
2018-03-30 02:54:00,2064.5,13.5,-45.55,3.91,110.0,2.4
2018-03-30 03:15:00,2093.3,30.1,-45.55,3.86,220.0,1.0
2018-03-30 03:35:00,2160.8,10.6,-45.52,3.7,0.0,0.3
2018-03-30 03:55:00,2184.3,44.4,-45.63,3.72,110.0,0.3
2018-03-30 04:15:00,2094.7,14.9,-45.3,4.02,132.0,1.4
2018-03-30 04:35:00,2077.8,7.6,-45.27,3.82,88.0,1.4
2018-03-30 04:55:00,2072.1,4.1,-45.46,3.93,88.0,1.7
2018-03-30 05:14:00,2086.5,9.6,-45.51,3.77,132.0,3.1
2018-03-30 05:34:00,2109.4,13.0,-45.37,3.67,110.0,2.4
2018-03-30 05:55:00,2094.7,2.2,-45.38,3.8,88.0,2.0
2018-03-30 06:15:00,2101.9,9.6,-45.59,3.88,132.0,2.4
2018-03-30 06:34:00,2123.7,15.7,-45.3,3.85,132.0,1.7
2018-03-30 06:50:00,2091.5,5.7,-45.46,3.62,132.0,2.7
2018-03-30 08:44:00,2025.0,10.2,-45.43,4.25,132.0,3.4
2018-03-30 09:04:00,2059.0,47.0,-45.21,4.02,88.0,3.1
2018-03-30 09:24:00,2087.1,37.1,-45.35,3.79,88.0,3.7
2018-03-30 09:45:00,2071.1,33.5,-45.1,3.91,88.0,2.4
2018-03-30 10:04:00,2082.7,53.5,-45.49,4.03,88.0,4.4
2018-03-30 10:25:00,2084.4,31.7,-45.7,3.77,44.0,2.4
2018-03-30 10:44:00,2076.2,23.8,-45.64,3.99,132.0,3.1
2018-03-30 11:04:00,2131.5,51.2,-45.09,3.74,44.0,3.4
2018-03-30 11:24:00,2119.5,51.1,-45.02,3.66,44.0,2.4
2018-03-30 11:44:00,2114.4,73.8,-44.97,3.84,88.0,1.7
2018-03-30 12:04:00,2160.2,62.3,-44.68,3.71,44.0,4.8
2018-03-30 12:24:00,2133.2,70.1,-44.9,3.85,88.0,3.4
2018-03-30 12:45:00,2066.5,43.0,-45.26,3.7,132.0,6.5
2018-03-30 13:05:00,2047.6,40.3,-45.35,3.95,44.0,1.4
2018-03-30 13:25:00,2082.9,50.8,-45.35,4.01,66.0,5.8
2018-03-30 13:45:00,2086.7,52.7,-45.26,3.87,88.0,7.1
2018-03-30 14:04:00,2085.5,49.5,-45.83,4.0,88.0,6.8
2018-03-30 14:24:00,2159.3,98.2,-45.0,3.51,110.0,6.1
2018-03-30 14:44:00,2081.2,37.7,-45.64,3.61,88.0,5.4
2018-03-30 15:04:00,2132.7,53.8,-45.34,3.65,44.0,6.5
2018-03-30 15:25:00,2170.9,49.7,-44.58,3.76,88.0,8.2
2018-03-30 15:45:00,2134.1,52.9,-44.46,3.76,88.0,3.4
2018-03-30 16:05:00,2145.6,52.0,-44.79,3.72,44.0,4.1
2018-03-30 16:24:00,2157.6,64.6,-44.7,3.56,88.0,3.7
2018-03-30 16:45:00,2161.3,37.9,-44.73,3.6,66.0,3.1
2018-03-30 17:04:00,2185.6,52.1,-44.71,3.61,44.0,3.7
2018-03-30 17:25:00,2113.3,15.8,-44.92,3.78,110.0,4.1
2018-03-30 17:45:00,2128.2,12.8,-45.21,3.94,88.0,1.7
2018-03-30 18:04:00,2118.1,11.3,-44.89,3.88,132.0,2.7
2018-03-30 18:20:00,2097.0,4.8,-44.84,3.77,44.0,1.7
2018-03-30 20:16:00,2111.2,51.9,-45.3,3.75,88.0,1.4
2018-03-30 20:36:00,2076.8,18.9,-45.9,3.82,264.0,3.4
2018-03-30 20:56:00,2038.3,17.9,-45.54,4.08,132.0,4.1
2018-03-30 21:16:00,2036.3,8.9,-45.5,3.91,44.0,1.7
2018-03-30 21:35:00,2064.7,10.8,-45.48,3.74,220.0,2.0
2018-03-30 21:55:00,2061.0,9.6,-45.67,3.97,220.0,2.0
2018-03-30 22:16:00,2050.3,5.0,-45.86,4.02,264.0,2.4
2018-03-30 22:35:00,2042.0,11.2,-45.6,4.0,132.0,3.1
2018-03-30 22:56:00,2030.6,8.3,-45.62,3.99,176.0,3.1
2018-03-30 23:15:00,2026.2,5.2,-45.83,4.15,176.0,3.7
2018-03-30 23:35:00,2027.6,7.7,-45.54,3.93,154.0,4.4
2018-03-30 23:55:00,2036.5,4.6,-45.47,3.78,264.0,3.1
2018-03-31 00:16:00,2029.3,7.3,-45.37,4.11,176.0,2.4
2018-03-31 00:36:00,2045.1,8.4,-45.11,4.02,132.0,1.4
2018-03-31 00:55:00,2051.6,13.9,-45.43,4.17,220.0,2.4
2018-03-31 01:16:00,2044.9,6.1,-46.13,3.75,198.0,1.7
2018-03-31 01:35:00,2036.7,5.8,-46.05,3.99,88.0,1.7
2018-03-31 01:56:00,2033.5,7.0,-46.56,4.04,176.0,1.7
2018-03-31 02:15:00,2029.5,5.4,-46.36,3.99,176.0,2.4
2018-03-31 02:36:00,2028.5,4.7,-46.01,4.02,132.0,1.4
2018-03-31 02:56:00,2032.1,4.8,-45.91,3.65,88.0,1.4
2018-03-31 03:16:00,2052.3,10.6,-45.35,3.68,132.0,2.0
2018-03-31 03:36:00,2044.0,5.1,-45.92,3.92,264.0,1.4
2018-03-31 03:55:00,2041.6,6.3,-45.6,4.19,132.0,2.0
2018-03-31 04:15:00,2034.3,5.1,-45.99,4.04,88.0,1.0
2018-03-31 04:35:00,2033.9,6.0,-45.94,3.99,220.0,1.4
2018-03-31 04:55:00,2033.8,5.4,-46.45,3.73,220.0,1.7
2018-03-31 05:15:00,2037.9,5.0,-46.28,3.71,220.0,1.4
2018-03-31 05:35:00,2054.3,5.4,-46.16,3.85,264.0,1.4
2018-03-31 05:56:00,2060.6,8.9,-45.39,3.77,220.0,1.4
2018-03-31 06:15:00,2065.9,7.0,-46.04,4.09,220.0,3.1
2018-03-31 06:35:00,2073.1,9.6,-46.43,3.91,198.0,1.0
2018-03-31 06:51:00,2078.0,6.4,-46.32,4.13,308.0,2.0
2018-03-31 08:45:00,2059.5,8.7,-46.43,3.96,264.0,1.7
2018-03-31 09:06:00,2060.3,3.9,-46.31,3.89,308.0,1.4
2018-03-31 09:26:00,2069.3,7.2,-46.12,3.8,176.0,1.4
2018-03-31 09:46:00,2076.6,5.4,-46.31,3.93,220.0,1.0
2018-03-31 10:06:00,2076.6,5.6,-46.79,3.59,264.0,1.7
2018-03-31 10:25:00,2076.5,10.1,-46.39,3.8,264.0,1.7
2018-03-31 10:46:00,2077.1,5.6,-46.6,3.9,264.0,1.7
2018-03-31 11:05:00,2086.7,8.4,-46.45,3.84,308.0,0.7
2018-03-31 11:26:00,2094.5,7.4,-45.98,4.21,264.0,2.0
2018-03-31 11:46:00,2110.0,6.5,-46.41,3.9,308.0,0.7
2018-03-31 12:05:00,2111.8,7.0,-46.5,3.72,264.0,0.7
2018-03-31 12:26:00,2108.5,5.9,-46.3,3.98,176.0,0.3
2018-03-31 12:46:00,2111.1,6.1,-45.79,3.68,264.0,1.4
2018-03-31 13:06:00,2100.2,10.5,-46.28,3.78,308.0,1.0
2018-03-31 13:26:00,2084.9,16.2,-45.93,4.03,286.0,2.0
2018-03-31 13:46:00,2066.6,6.5,-46.4,3.81,308.0,1.4
2018-03-31 14:06:00,2058.4,7.7,-46.2,3.76,242.0,1.0
2018-03-31 14:25:00,2063.9,11.6,-46.01,4.08,308.0,1.0
2018-03-31 14:46:00,2071.1,14.1,-46.38,3.91,308.0,2.4
2018-03-31 15:06:00,2042.7,7.7,-46.69,3.98,220.0,1.7
2018-03-31 15:26:00,2043.2,12.6,-45.98,4.07,308.0,2.0
2018-03-31 15:45:00,2037.8,9.8,-46.22,3.89,220.0,1.7
2018-03-31 16:05:00,2036.0,9.2,-46.63,3.86,308.0,1.4
2018-03-31 16:25:00,2046.4,14.3,-46.42,4.16,220.0,3.4
2018-03-31 16:45:00,2036.4,8.3,-46.73,3.98,286.0,2.0
2018-03-31 17:05:00,2031.9,9.4,-46.26,3.71,286.0,5.8
2018-03-31 17:25:00,2033.7,7.8,-46.29,3.83,0.0,4.1
2018-03-31 17:45:00,2026.4,11.1,-45.96,4.07,308.0,2.7
2018-03-31 18:06:00,2028.6,8.7,-46.33,4.04,330.0,3.4
2018-03-31 18:21:00,2046.2,13.9,-46.33,3.91,0.0,2.0
2018-03-31 20:16:00,2045.4,7.6,-46.57,4.0,264.0,4.4
2018-03-31 20:36:00,2049.7,12.0,-46.56,3.9,264.0,5.8
2018-03-31 20:57:00,2052.3,8.6,-46.91,3.99,0.0,3.7
2018-03-31 21:17:00,2053.1,12.0,-46.75,3.86,308.0,4.8
2018-03-31 21:37:00,2043.6,5.6,-46.39,3.71,88.0,3.1
2018-03-31 21:57:00,2037.6,13.4,-46.98,3.91,286.0,2.7
2018-03-31 22:16:00,2053.3,10.8,-46.85,3.82,286.0,4.4
2018-03-31 22:36:00,2027.3,12.0,-46.44,3.82,308.0,6.1
2018-03-31 22:56:00,2027.8,10.0,-46.44,3.78,0.0,5.4
2018-03-31 23:17:00,2042.3,7.4,-46.48,3.89,330.0,4.1
2018-03-31 23:37:00,2036.2,10.0,-46.82,3.79,0.0,4.4
2018-03-31 23:56:00,2034.5,10.3,-46.83,3.95,264.0,3.7
2018-04-01 00:17:00,2045.6,9.3,-47.11,3.91,0.0,3.4
2018-04-01 00:37:00,2051.4,5.6,-46.58,3.69,264.0,3.1
2018-04-01 00:56:00,2046.2,10.2,-47.18,3.84,264.0,3.4
2018-04-01 01:17:00,2053.1,6.9,-46.54,3.84,308.0,2.0
2018-04-01 01:36:00,2051.9,7.1,-47.13,3.62,176.0,4.1
2018-04-01 01:56:00,2049.0,11.5,-46.85,3.94,308.0,2.7
2018-04-01 02:16:00,2045.9,8.9,-46.96,3.7,0.0,3.7
2018-04-01 02:37:00,2033.6,8.7,-47.02,3.94,308.0,4.1
2018-04-01 02:56:00,2048.9,10.2,-47.05,4.04,308.0,2.0
2018-04-01 03:16:00,2044.9,13.6,-47.08,3.88,44.0,4.1
2018-04-01 03:37:00,2038.1,11.4,-47.05,3.6,286.0,2.4
2018-04-01 03:57:00,2043.4,10.1,-47.19,4.13,308.0,2.4
2018-04-01 04:17:00,2038.1,11.8,-47.07,3.88,308.0,1.4
2018-04-01 04:37:00,2048.6,14.6,-46.71,3.83,0.0,2.7
2018-04-01 04:56:00,2042.5,14.1,-46.89,3.69,308.0,2.4
2018-04-01 05:16:00,2042.8,7.4,-46.91,3.71,264.0,3.4
2018-04-01 05:37:00,2054.0,11.0,-46.92,3.77,308.0,1.7
2018-04-01 05:56:00,2067.5,10.7,-46.73,3.82,308.0,2.4
2018-04-01 06:17:00,2064.3,12.2,-46.77,3.74,0.0,1.4
2018-04-01 06:36:00,2073.5,8.6,-46.6,3.83,308.0,1.7
2018-04-01 06:52:00,2062.3,7.7,-46.69,4.18,264.0,1.0
2018-04-01 08:47:00,2033.2,12.3,-46.91,3.97,0.0,2.4
2018-04-01 09:07:00,2028.5,6.4,-46.8,3.84,308.0,1.0
2018-04-01 09:27:00,2040.0,8.9,-47.15,3.83,0.0,2.0
2018-04-01 09:48:00,2025.7,11.0,-46.81,3.53,308.0,1.4
2018-04-01 10:08:00,2034.1,13.9,-46.42,3.82,220.0,1.7
2018-04-01 10:28:00,2038.0,18.4,-46.81,4.04,308.0,1.4
2018-04-01 10:47:00,2017.2,8.4,-46.86,3.89,88.0,1.0
2018-04-01 11:07:00,2025.9,11.3,-46.88,4.14,308.0,1.4
2018-04-01 11:28:00,2015.2,10.8,-46.97,4.0,220.0,0.7
2018-04-01 11:48:00,2015.0,7.3,-47.0,4.31,264.0,1.7
2018-04-01 12:08:00,2017.5,5.6,-46.87,3.81,220.0,2.0
2018-04-01 12:27:00,2048.8,11.5,-46.66,4.04,88.0,1.7
2018-04-01 12:47:00,2036.2,9.6,-46.58,3.94,264.0,0.7
2018-04-01 13:07:00,2037.4,12.1,-46.96,3.72,264.0,2.0
2018-04-01 13:28:00,2045.3,6.3,-46.75,4.09,0.0,1.7
2018-04-01 13:47:00,2033.3,9.0,-46.88,3.74,154.0,0.7
2018-04-01 14:08:00,2050.2,7.8,-46.5,3.83,264.0,0.7
2018-04-01 14:28:00,2043.2,8.7,-46.71,3.94,264.0,0.0
2018-04-01 14:48:00,2059.6,13.2,-46.97,3.67,220.0,1.0
2018-04-01 15:07:00,2046.6,13.7,-46.83,3.85,132.0,1.0
2018-04-01 15:27:00,2062.2,13.3,-46.98,3.67,0.0,0.7
2018-04-01 15:48:00,2051.8,7.1,-46.95,3.87,132.0,0.7
2018-04-01 16:08:00,2066.0,7.7,-47.24,3.92,176.0,0.3
2018-04-01 16:28:00,2070.0,11.2,-46.47,3.92,88.0,1.0
2018-04-01 16:47:00,2068.1,8.0,-46.92,3.89,264.0,0.7
2018-04-01 17:07:00,2070.7,8.3,-47.08,3.76,176.0,1.0
2018-04-01 17:27:00,2088.9,34.0,-47.24,3.87,176.0,1.0
2018-04-01 17:47:00,2142.7,80.9,-46.72,3.73,220.0,0.3
2018-04-01 18:07:00,2097.3,24.2,-47.03,3.79,132.0,1.7
2018-04-01 18:23:00,2109.2,34.8,-46.71,3.96,88.0,1.4
2018-04-01 20:18:00,2079.1,5.1,-46.81,3.75,88.0,2.0
2018-04-01 20:38:00,2163.7,58.2,-46.55,3.84,176.0,2.0
2018-04-01 20:57:00,2117.0,34.5,-46.75,3.74,176.0,3.4
2018-04-01 21:17:00,2091.9,10.9,-46.84,3.57,176.0,3.7
2018-04-01 21:38:00,2073.4,14.7,-47.1,3.79,154.0,3.1
2018-04-01 21:57:00,2076.7,21.5,-46.62,3.77,176.0,2.0
2018-04-01 22:18:00,2080.3,39.8,-46.37,3.81,132.0,2.7
2018-04-01 22:37:00,2034.5,21.9,-46.99,3.68,44.0,1.4
2018-04-01 22:57:00,2041.0,22.8,-46.37,4.09,88.0,3.4
2018-04-01 23:17:00,2031.1,6.9,-47.17,3.69,132.0,2.4
2018-04-01 23:37:00,2038.5,9.4,-46.77,4.11,88.0,4.4
2018-04-01 23:57:00,2048.7,6.5,-46.86,3.93,110.0,2.4
2018-04-02 00:17:00,2044.4,6.1,-46.74,3.93,66.0,2.7
2018-04-02 00:37:00,2047.1,7.0,-46.76,3.86,132.0,2.7
2018-04-02 00:57:00,2044.8,5.8,-47.01,3.95,132.0,2.4
2018-04-02 01:18:00,2047.2,9.1,-46.54,3.9,110.0,4.1
2018-04-02 01:38:00,2058.8,20.0,-46.77,4.05,132.0,3.1
2018-04-02 01:58:00,2066.9,11.9,-46.7,3.84,132.0,3.1
2018-04-02 02:18:00,2080.3,6.6,-46.53,3.78,132.0,2.7
2018-04-02 02:37:00,2096.5,8.1,-46.73,3.75,88.0,2.4
2018-04-02 02:58:00,2086.5,7.1,-46.05,3.77,0.0,2.4
2018-04-02 03:17:00,2096.5,21.4,-46.05,3.9,44.0,2.7
2018-04-02 03:38:00,2088.9,23.9,-46.65,3.85,88.0,2.0
2018-04-02 03:58:00,2164.0,55.5,-46.08,3.8,132.0,1.4
2018-04-02 04:18:00,2128.2,43.0,-45.88,3.87,110.0,0.7
2018-04-02 04:38:00,2088.2,44.1,-46.17,3.6,176.0,3.1
2018-04-02 04:58:00,2062.5,35.3,-46.42,3.96,132.0,3.1
2018-04-02 05:18:00,2075.6,10.0,-46.33,3.89,132.0,2.7
2018-04-02 05:38:00,2089.2,19.8,-46.63,4.03,176.0,4.1
2018-04-02 05:57:00,2072.9,20.3,-45.99,3.85,132.0,1.0
2018-04-02 06:17:00,2058.1,8.4,-46.49,4.0,88.0,3.4
2018-04-02 06:38:00,2088.4,36.3,-46.45,4.17,44.0,2.4
2018-04-02 06:53:00,2089.4,11.4,-46.22,3.79,176.0,3.1
2018-04-02 08:48:00,2074.3,14.3,-46.33,4.16,176.0,1.7
2018-04-02 09:08:00,2070.9,16.5,-46.2,3.78,176.0,1.7
2018-04-02 09:28:00,2096.4,25.4,-46.03,3.87,176.0,3.1
2018-04-02 09:48:00,2085.4,9.1,-46.44,3.76,176.0,1.4
2018-04-02 10:07:00,2070.6,9.8,-46.03,4.06,220.0,1.7
2018-04-02 10:27:00,2053.0,4.6,-45.73,4.18,132.0,3.1
2018-04-02 10:47:00,2049.4,12.8,-46.37,4.01,88.0,4.1
2018-04-02 11:08:00,2055.4,7.5,-45.77,3.93,132.0,1.7
2018-04-02 11:28:00,2051.9,7.9,-45.94,4.0,220.0,3.1
2018-04-02 11:48:00,2086.6,24.3,-45.75,3.79,176.0,3.1
2018-04-02 12:07:00,2110.9,38.8,-45.32,3.66,132.0,1.7
2018-04-02 12:27:00,2084.1,16.2,-45.64,3.96,220.0,3.4
2018-04-02 12:47:00,2067.1,10.3,-45.7,4.05,132.0,3.4
2018-04-02 13:07:00,2075.4,8.0,-45.69,3.96,176.0,2.7
2018-04-02 13:27:00,2070.7,4.6,-46.38,3.81,220.0,3.7
2018-04-02 13:47:00,2066.7,5.2,-45.48,3.99,176.0,4.1
2018-04-02 14:08:00,2081.2,6.5,-45.71,4.04,132.0,1.0
2018-04-02 14:27:00,2077.4,8.3,-45.94,3.8,220.0,1.0
2018-04-02 14:48:00,2062.8,4.2,-45.55,4.04,176.0,2.4
2018-04-02 15:08:00,2058.0,6.9,-45.19,3.97,66.0,3.1
2018-04-02 15:28:00,2064.9,6.5,-45.9,3.98,176.0,3.4
2018-04-02 15:48:00,2076.1,10.9,-45.3,3.87,132.0,2.4
2018-04-02 16:07:00,2073.7,4.8,-45.83,4.06,220.0,1.0
2018-04-02 16:27:00,2073.0,6.4,-45.52,4.0,176.0,3.1
2018-04-02 16:47:00,2077.8,8.2,-45.96,4.29,264.0,2.4
2018-04-02 17:08:00,2085.3,9.1,-45.75,4.16,132.0,1.0
2018-04-02 17:27:00,2080.4,8.6,-45.98,3.85,176.0,3.7
2018-04-02 17:47:00,2088.5,17.7,-45.55,3.92,176.0,1.7
2018-04-02 18:08:00,2095.7,12.3,-45.96,3.77,132.0,1.0
2018-04-02 18:23:00,2101.3,12.3,-45.61,3.68,220.0,2.4
2018-04-02 20:18:00,2104.1,9.7,-45.69,3.81,176.0,1.4
2018-04-02 20:38:00,2109.6,4.9,-45.06,3.83,88.0,2.7
2018-04-02 20:58:00,2107.6,18.4,-45.54,3.55,176.0,2.4
2018-04-02 21:18:00,2081.9,14.9,-45.43,3.74,132.0,1.4
2018-04-02 21:38:00,2050.3,10.4,-45.12,4.09,132.0,3.7
2018-04-02 21:59:00,2056.3,6.3,-45.14,3.86,198.0,1.0
2018-04-02 22:18:00,2036.7,17.0,-45.13,4.07,176.0,1.0
2018-04-02 22:38:00,2016.0,10.0,-45.1,4.09,220.0,3.7
2018-04-02 22:58:00,2011.7,12.8,-45.01,4.08,176.0,1.7
2018-04-02 23:19:00,2005.3,6.4,-45.11,3.98,176.0,1.4
2018-04-02 23:39:00,2023.8,10.9,-45.0,4.17,176.0,2.4
2018-04-02 23:58:00,2035.6,5.2,-44.96,3.91,154.0,1.7
2018-04-03 00:18:00,2034.1,6.4,-45.38,3.98,220.0,1.7
2018-04-03 00:39:00,2033.2,7.9,-45.1,4.05,220.0,2.4
2018-04-03 00:59:00,2019.2,7.3,-44.89,3.88,220.0,3.4
2018-04-03 01:19:00,2005.2,5.1,-45.26,4.04,176.0,1.4
2018-04-03 01:39:00,2015.4,9.3,-45.26,4.06,132.0,3.1
2018-04-03 01:59:00,2022.5,7.9,-45.32,4.1,176.0,2.7
2018-04-03 02:19:00,2031.5,10.8,-45.1,4.04,176.0,1.7
2018-04-03 02:39:00,2026.8,7.1,-45.07,3.87,0.0,3.1
2018-04-03 02:59:00,2023.8,8.7,-45.29,4.32,176.0,1.4
2018-04-03 03:19:00,2023.5,7.6,-45.53,4.02,220.0,1.7
2018-04-03 03:39:00,2015.8,6.4,-45.48,4.05,154.0,4.4
2018-04-03 03:58:00,1999.8,6.4,-45.39,4.22,242.0,3.1
2018-04-03 04:18:00,1997.5,6.2,-45.42,4.39,220.0,4.8
2018-04-03 04:38:00,2000.7,4.1,-45.75,3.99,176.0,1.7
2018-04-03 04:59:00,2012.2,24.8,-45.27,3.84,220.0,3.1
2018-04-03 05:19:00,2007.5,5.0,-45.51,3.94,308.0,1.7
2018-04-03 05:38:00,2007.5,7.6,-45.26,4.22,264.0,4.1
2018-04-03 05:59:00,2008.2,4.4,-45.38,4.23,154.0,2.7
2018-04-03 06:18:00,2014.9,6.6,-45.11,4.04,176.0,3.4
2018-04-03 06:38:00,2016.0,5.9,-45.96,4.13,176.0,2.0
2018-04-03 06:54:00,2020.0,7.0,-46.06,3.89,176.0,3.4
2018-04-03 08:48:00,2000.3,4.5,-45.58,4.2,264.0,2.4
2018-04-03 09:08:00,1997.9,4.4,-45.66,4.13,176.0,4.8
2018-04-03 09:28:00,1998.2,7.1,-45.47,4.02,132.0,5.4
2018-04-03 09:49:00,1998.0,5.5,-45.16,4.09,132.0,6.5
2018-04-03 10:08:00,2003.5,4.9,-45.5,4.04,132.0,3.7
2018-04-03 10:28:00,2001.3,5.0,-45.6,4.05,176.0,3.4
2018-04-03 10:48:00,2001.3,5.9,-45.59,4.0,88.0,4.8
2018-04-03 11:08:00,2005.8,6.0,-46.01,3.95,220.0,3.7
2018-04-03 11:28:00,2005.6,8.9,-45.44,4.18,264.0,3.4
2018-04-03 11:49:00,1991.4,8.9,-45.54,4.0,176.0,4.4
2018-04-03 12:08:00,1987.3,9.9,-45.43,3.84,220.0,4.1
2018-04-03 12:28:00,1977.6,3.2,-45.12,4.14,220.0,3.7
2018-04-03 12:49:00,1982.0,4.5,-45.57,4.1,308.0,3.1
2018-04-03 13:09:00,1980.2,8.5,-45.53,4.3,0.0,6.1
2018-04-03 13:28:00,1968.3,3.8,-45.44,4.04,88.0,3.4
2018-04-03 13:48:00,1964.7,7.0,-45.57,4.28,220.0,2.7
2018-04-03 14:09:00,1964.9,7.6,-45.61,4.06,330.0,5.1
2018-04-03 14:28:00,1958.7,4.2,-45.69,4.23,198.0,5.8
2018-04-03 14:48:00,1961.3,4.6,-46.04,3.96,176.0,4.1
2018-04-03 15:09:00,1960.4,4.6,-46.15,4.07,176.0,2.7
2018-04-03 15:29:00,1959.7,3.3,-46.29,4.55,264.0,5.1
2018-04-03 15:49:00,1964.2,5.2,-46.09,4.21,176.0,2.7
2018-04-03 16:09:00,1979.1,5.1,-46.19,3.87,220.0,4.4
2018-04-03 16:28:00,1977.4,4.8,-46.08,3.95,0.0,2.0
2018-04-03 16:49:00,1976.4,3.9,-46.28,3.9,308.0,4.8
2018-04-03 17:09:00,1982.8,9.3,-46.38,4.09,220.0,5.8
2018-04-03 17:29:00,1977.1,4.1,-46.49,4.1,220.0,5.1
2018-04-03 17:49:00,1991.4,6.7,-46.42,3.93,88.0,2.0
2018-04-03 18:08:00,1988.5,4.6,-45.95,3.69,176.0,3.7
2018-04-03 18:24:00,1990.2,8.0,-46.11,3.71,308.0,4.4
2018-04-03 20:20:00,2005.9,5.0,-46.53,3.89,242.0,3.1
2018-04-03 20:40:00,2009.8,5.2,-46.0,3.98,176.0,3.1
2018-04-03 21:00:00,2011.4,7.2,-46.45,3.94,176.0,2.4
2018-04-03 21:20:00,2032.3,11.1,-46.37,3.7,264.0,2.7
2018-04-03 21:40:00,2048.0,8.8,-45.71,3.88,132.0,1.4
2018-04-03 22:00:00,2045.1,20.0,-45.71,3.9,154.0,1.7
2018-04-03 22:19:00,2067.3,18.8,-46.21,3.68,176.0,2.0
2018-04-03 22:39:00,2121.2,17.7,-46.08,4.0,154.0,3.4
2018-04-03 22:59:00,2183.8,31.0,-46.92,3.58,176.0,2.7
2018-04-03 23:20:00,2155.0,28.2,-46.42,3.69,176.0,2.4
2018-04-03 23:39:00,2163.2,47.5,-46.34,3.67,88.0,2.4
2018-04-03 23:59:00,2120.1,31.5,-45.77,4.1,176.0,2.7
2018-04-04 00:19:00,2092.5,31.5,-45.79,3.81,132.0,2.7
2018-04-04 00:40:00,2090.9,33.2,-45.98,3.95,132.0,2.7
2018-04-04 01:00:00,2121.0,43.1,-46.14,3.8,22.0,1.4
2018-04-04 01:19:00,2105.7,35.4,-46.21,3.76,88.0,2.4
2018-04-04 01:39:00,2087.7,36.4,-46.41,4.1,176.0,0.7
2018-04-04 02:00:00,2107.6,41.9,-45.98,3.98,176.0,2.4
2018-04-04 02:20:00,2061.5,22.7,-46.72,3.86,176.0,1.7
2018-04-04 02:40:00,2071.9,15.6,-46.8,3.92,132.0,5.4
2018-04-04 03:00:00,2043.0,9.0,-46.25,4.13,198.0,3.1
2018-04-04 03:20:00,2068.9,12.3,-46.84,3.95,176.0,4.8
2018-04-04 03:40:00,2050.1,20.0,-46.9,3.91,132.0,5.1
2018-04-04 04:00:00,2031.0,15.8,-46.0,3.86,220.0,2.7
2018-04-04 04:19:00,2117.5,46.6,-45.75,3.93,132.0,3.4
2018-04-04 04:39:00,2073.0,35.6,-46.06,4.14,88.0,0.7
2018-04-04 04:59:00,2076.6,30.9,-45.88,3.92,132.0,2.4
2018-04-04 05:19:00,2071.8,29.6,-46.23,3.85,176.0,2.0
2018-04-04 05:40:00,2060.7,37.8,-45.95,4.01,176.0,3.4
2018-04-04 06:00:00,2064.2,31.7,-46.27,4.22,132.0,2.4
2018-04-04 06:20:00,2051.6,31.5,-45.78,3.69,110.0,3.1
2018-04-04 06:40:00,2033.5,23.1,-45.86,4.26,132.0,3.4
2018-04-04 06:55:00,2035.9,10.0,-46.25,4.04,132.0,4.8
2018-04-04 08:50:00,1989.3,4.8,-46.42,3.91,242.0,5.8
2018-04-04 09:10:00,1988.5,5.3,-46.93,3.84,220.0,3.7
2018-04-04 09:30:00,1987.1,7.2,-46.64,4.02,176.0,8.2
2018-04-04 09:49:00,1986.7,4.4,-46.08,3.99,176.0,5.4
2018-04-04 10:10:00,1993.6,6.4,-46.02,4.02,176.0,2.7
2018-04-04 10:30:00,1987.1,4.8,-46.52,4.1,132.0,5.4
2018-04-04 10:50:00,1981.4,3.6,-46.38,4.12,154.0,6.8
2018-04-04 11:10:00,1979.9,4.5,-46.66,3.95,176.0,4.8
2018-04-04 11:30:00,1983.2,5.1,-46.59,4.15,132.0,7.5
2018-04-04 11:49:00,1983.4,4.1,-47.44,4.15,176.0,7.5
2018-04-04 12:09:00,1983.4,7.0,-46.38,4.03,220.0,5.4
2018-04-04 12:29:00,1985.5,3.8,-46.36,4.16,220.0,4.4
2018-04-04 12:50:00,1986.5,7.6,-46.59,4.06,220.0,3.4
2018-04-04 13:10:00,1976.7,5.6,-46.28,4.12,220.0,2.4
2018-04-04 13:21:00,1964.1,3.7,-46.01,4.12,220.0,5.1
2018-04-04 13:56:00,1981.2,6.6,-46.39,3.63,176.0,5.4
2018-04-04 14:10:00,1980.0,4.8,-46.37,4.12,176.0,4.1
2018-04-04 14:22:00,1981.4,4.7,-47.58,4.24,88.0,3.7
2018-04-04 14:54:00,1982.2,5.2,-46.27,3.89,220.0,5.1
2018-04-04 15:08:00,1973.7,5.6,-46.56,4.16,286.0,5.1
2018-04-04 15:34:00,1966.5,2.8,-46.2,3.81,176.0,5.1
2018-04-04 15:49:00,1965.7,4.9,-46.04,4.1,176.0,7.1
2018-04-04 16:09:00,1965.5,3.7,-46.76,4.07,220.0,3.7
2018-04-04 16:24:00,1967.9,4.2,-46.73,4.57,176.0,4.1
2018-04-04 16:58:00,1965.0,4.7,-45.15,3.88,220.0,4.4
2018-04-04 17:09:00,1967.9,3.4,-46.58,4.12,308.0,3.7
2018-04-04 17:29:00,1972.6,3.9,-46.0,3.89,88.0,4.4
2018-04-04 17:49:00,1974.1,3.5,-46.22,4.13,264.0,5.1
2018-04-04 18:09:00,1980.4,6.0,-46.57,4.04,176.0,2.7
2018-04-04 18:25:00,1981.2,4.4,-46.6,4.08,308.0,3.7
2018-04-04 20:20:00,2006.0,4.3,-47.3,3.88,220.0,3.7
2018-04-04 20:40:00,2015.2,7.0,-46.83,4.21,264.0,4.1
2018-04-04 21:01:00,2020.2,7.0,-46.46,4.18,308.0,3.4
2018-04-04 21:20:00,1994.1,3.7,-46.73,3.88,264.0,6.8
2018-04-04 21:40:00,2000.3,4.4,-47.21,3.85,308.0,5.1
2018-04-04 22:01:00,2010.8,4.7,-47.43,4.0,308.0,4.8
2018-04-04 22:21:00,2004.5,3.1,-47.45,3.97,264.0,5.1
2018-04-04 22:41:00,1999.2,5.9,-47.74,4.0,308.0,4.4
2018-04-04 23:01:00,1995.0,3.3,-48.37,4.14,308.0,6.5
2018-04-04 23:20:00,2011.9,7.4,-47.78,4.19,286.0,3.1
2018-04-04 23:40:00,2012.2,3.1,-47.82,3.83,220.0,4.1
2018-04-05 00:00:00,2013.2,3.8,-48.38,4.03,308.0,4.4
2018-04-05 00:20:00,2017.6,4.0,-48.19,3.75,264.0,2.7
2018-04-05 00:41:00,2021.7,4.3,-48.14,4.0,220.0,3.4
2018-04-05 01:01:00,2008.2,3.0,-47.97,4.05,264.0,4.1
2018-04-05 01:21:00,2001.8,1.8,-47.98,4.03,264.0,4.8
2018-04-05 01:41:00,2003.1,8.7,-48.1,3.99,286.0,4.8
2018-04-05 02:01:00,1989.3,3.2,-48.31,4.15,220.0,7.5
2018-04-05 02:21:00,2002.5,8.5,-48.38,4.05,220.0,4.1
2018-04-05 02:41:00,2004.9,3.5,-48.22,4.15,264.0,3.1
2018-04-05 03:01:00,1988.4,12.5,-48.56,3.92,264.0,2.4
2018-04-05 03:20:00,1990.6,11.0,-47.93,3.94,308.0,2.4
2018-04-05 03:40:00,1998.5,4.3,-47.99,4.08,0.0,4.1
2018-04-05 04:00:00,2005.1,4.7,-48.22,4.1,176.0,2.4
2018-04-05 04:20:00,2008.7,4.5,-47.86,3.97,264.0,2.0
2018-04-05 04:40:00,2005.9,5.0,-48.06,4.11,264.0,3.4
2018-04-05 05:00:00,2003.4,9.2,-48.26,3.91,308.0,3.1
2018-04-05 05:20:00,2008.4,7.1,-47.97,3.99,44.0,1.7
2018-04-05 05:41:00,2021.6,5.3,-48.11,3.82,44.0,2.0
2018-04-05 06:01:00,2023.7,9.0,-47.69,3.84,0.0,1.7
2018-04-05 06:20:00,2032.0,8.4,-47.56,3.68,264.0,1.4
2018-04-05 06:40:00,2034.0,10.1,-47.18,3.9,330.0,1.7
2018-04-05 06:56:00,2022.2,7.8,-47.58,3.9,44.0,2.7
2018-04-05 08:52:00,1988.0,8.9,-47.12,4.02,0.0,1.4
2018-04-05 09:11:00,1996.6,11.6,-47.46,4.07,308.0,1.4
2018-04-05 09:31:00,1986.5,6.8,-47.3,3.97,220.0,3.1
2018-04-05 09:42:00,1985.3,0.9,-46.41,2.75,308.0,1.4
2018-04-05 12:46:00,nan,nan,nan,nan,176.0,2.0
2018-04-05 13:08:00,1993.8,16.8,-46.29,4.06,176.0,2.4
2018-04-05 13:26:00,1997.5,6.8,-46.39,3.9,88.0,1.0
2018-04-05 13:45:00,1989.1,6.1,-46.76,4.34,242.0,2.4
2018-04-05 14:06:00,1989.4,3.8,-46.6,3.83,220.0,2.0
2018-04-05 14:21:00,2000.0,14.3,-46.89,3.92,88.0,1.4
2018-04-05 16:15:00,2002.8,7.9,-46.42,4.14,176.0,3.1
2018-04-05 16:35:00,2002.5,12.0,-46.92,4.13,176.0,2.4
2018-04-05 16:55:00,2004.8,4.8,-46.54,4.0,220.0,2.4
2018-04-05 17:16:00,2006.3,5.1,-46.43,3.95,220.0,2.4
2018-04-05 17:36:00,2016.2,6.4,-46.14,4.22,132.0,2.4
2018-04-05 17:56:00,2017.4,7.1,-46.63,3.84,176.0,2.0
2018-04-05 18:15:00,2016.9,6.9,-46.82,4.12,286.0,4.1
2018-04-05 18:35:00,2021.4,8.2,-46.7,3.93,220.0,3.4
2018-04-05 18:55:00,2022.2,6.1,-46.64,3.97,154.0,1.4
2018-04-05 19:16:00,2023.4,16.9,-46.72,4.09,264.0,3.7
2018-04-05 19:36:00,2018.1,7.2,-46.61,3.96,176.0,3.7
2018-04-05 19:56:00,2030.1,10.8,-47.06,4.1,220.0,3.7
2018-04-05 20:16:00,2051.5,32.4,-46.39,4.01,176.0,3.4
2018-04-05 20:36:00,2042.9,32.3,-46.34,3.85,132.0,1.7
2018-04-05 20:55:00,2112.5,73.1,-45.5,4.06,132.0,3.7
2018-04-05 21:15:00,2096.8,52.9,-46.19,3.9,132.0,2.0
2018-04-05 21:36:00,2085.9,49.5,-46.25,3.86,88.0,1.4
2018-04-05 21:56:00,2058.1,52.8,-46.03,3.91,176.0,3.1
2018-04-05 22:15:00,2139.1,79.0,-45.44,3.57,132.0,3.1
2018-04-05 22:36:00,2182.4,93.3,-45.52,3.5,88.0,1.7
2018-04-05 22:56:00,2078.8,36.3,-46.18,3.79,88.0,1.4
2018-04-05 23:16:00,2026.4,10.1,-47.04,3.73,220.0,1.0
2018-04-05 23:35:00,2043.3,18.5,-46.42,3.97,0.0,0.7
2018-04-05 23:55:00,2035.9,8.4,-46.36,3.69,44.0,1.4
2018-04-06 00:16:00,2034.3,4.2,-46.59,3.89,88.0,1.7
2018-04-06 00:36:00,2036.2,5.6,-46.28,4.1,132.0,2.4
2018-04-06 00:55:00,2025.3,5.4,-46.66,3.78,88.0,2.0
2018-04-06 01:16:00,2019.6,3.1,-46.4,4.14,308.0,2.4
2018-04-06 01:36:00,2024.8,4.1,-47.09,4.15,88.0,3.4
2018-04-06 01:55:00,2033.9,3.1,-46.89,3.85,88.0,2.0
2018-04-06 02:16:00,2035.5,10.5,-46.71,3.96,88.0,2.4
2018-04-06 02:36:00,2023.4,3.3,-47.02,4.03,88.0,3.1
2018-04-06 02:51:00,2072.1,37.4,-46.57,3.87,0.0,1.4
2018-04-06 04:45:00,2041.4,5.1,-47.12,3.92,22.0,3.1
2018-04-06 05:05:00,2053.8,13.5,-47.16,3.96,88.0,2.7
2018-04-06 05:25:00,2064.9,6.3,-46.94,3.96,44.0,3.4
2018-04-06 05:45:00,2065.5,6.9,-47.28,3.87,88.0,2.4
2018-04-06 06:05:00,2069.3,4.1,-46.59,3.91,88.0,2.7
2018-04-06 06:25:00,2074.1,10.5,-46.62,3.64,110.0,4.1
2018-04-06 06:46:00,2056.3,7.1,-47.21,4.13,88.0,2.4
2018-04-06 07:05:00,2062.3,4.3,-46.44,3.86,88.0,2.4
2018-04-06 07:25:00,2071.6,24.3,-46.67,3.75,88.0,3.4
2018-04-06 07:45:00,2069.1,24.7,-46.94,3.89,44.0,3.4
2018-04-06 08:05:00,2047.3,18.6,-47.17,3.76,88.0,1.7
2018-04-06 08:25:00,2025.2,9.6,-47.02,4.04,44.0,4.8
2018-04-06 08:46:00,2023.7,2.8,-47.32,4.02,44.0,5.1
2018-04-06 09:05:00,2069.4,50.6,-47.14,3.91,88.0,2.4
2018-04-06 09:26:00,2032.6,29.7,-46.99,4.04,44.0,4.8
2018-04-06 09:45:00,2053.1,42.3,-47.01,4.1,88.0,3.1
2018-04-06 10:56:00,2056.3,32.9,-45.77,4.04,132.0,5.1
2018-04-06 11:13:00,2031.2,22.9,-46.55,3.96,176.0,6.5
2018-04-06 12:52:00,2064.7,46.8,-45.66,3.79,132.0,5.4
2018-04-06 13:12:00,2028.7,31.1,-46.74,4.05,132.0,6.8
2018-04-06 13:33:00,2017.9,21.1,-47.06,4.05,132.0,3.7
2018-04-06 13:52:00,2015.6,14.2,-46.91,4.04,220.0,5.1
2018-04-06 14:42:00,2043.8,44.5,-47.24,4.02,88.0,1.7
2018-04-06 15:00:00,2036.4,35.0,-47.02,3.94,132.0,5.1
2018-04-06 17:38:00,nan,nan,nan,nan,132.0,2.7
2018-04-06 17:58:00,nan,nan,nan,nan,132.0,3.1
2018-04-06 18:18:00,nan,nan,nan,nan,132.0,4.1
2018-04-06 18:39:00,nan,nan,nan,nan,176.0,2.7
2018-04-06 18:58:00,nan,nan,nan,nan,308.0,1.4
2018-04-06 19:14:00,nan,nan,nan,nan,154.0,2.0
2018-04-06 21:08:00,nan,nan,nan,nan,176.0,1.4
2018-04-06 21:28:00,nan,nan,nan,nan,88.0,1.4
2018-04-06 21:56:00,2115.7,4.2,-46.53,3.58,44.0,2.0
2018-04-06 22:08:00,2120.1,5.2,-46.94,3.82,88.0,0.7
2018-04-06 22:29:00,2131.9,5.2,-46.88,3.67,88.0,1.4
2018-04-06 22:48:00,2113.3,6.1,-47.03,3.99,88.0,1.4
2018-04-06 23:09:00,2121.1,4.3,-46.72,4.31,88.0,1.7
2018-04-06 23:29:00,2137.0,5.4,-47.03,3.93,88.0,1.7
2018-04-06 23:49:00,2168.8,12.0,-46.19,3.6,88.0,2.4
2018-04-07 00:08:00,2174.4,12.3,-46.48,3.84,132.0,1.0
2018-04-07 00:29:00,2166.1,7.3,-46.63,3.69,88.0,1.4
2018-04-07 00:49:00,2164.6,7.0,-46.51,3.55,88.0,2.0
2018-04-07 01:09:00,2169.4,10.9,-46.33,3.82,88.0,1.7
2018-04-07 01:29:00,2173.5,9.0,-46.39,3.73,0.0,1.7
2018-04-07 01:48:00,2166.4,14.1,-46.42,3.76,44.0,1.0
2018-04-07 02:09:00,2216.5,61.5,-46.35,3.52,88.0,1.0
2018-04-07 02:29:00,2392.8,10.1,-45.73,3.56,44.0,1.7
2018-04-07 02:48:00,2376.4,10.1,-45.75,3.43,44.0,1.0
2018-04-07 03:08:00,2365.2,18.4,-45.54,3.5,44.0,2.7
2018-04-07 03:28:00,2402.1,18.7,-45.14,3.3,88.0,1.7
2018-04-07 03:48:00,2345.4,26.8,-46.36,3.5,88.0,1.4
2018-04-07 04:09:00,2350.3,44.9,-46.47,3.39,88.0,1.0
2018-04-07 04:29:00,2431.4,37.2,-45.52,3.44,132.0,0.3
2018-04-07 04:49:00,2422.0,61.1,-45.94,3.64,66.0,1.4
2018-04-07 05:09:00,2294.8,7.2,-46.86,3.67,88.0,2.7
2018-04-07 05:28:00,2279.8,18.9,-47.01,3.43,88.0,2.7
2018-04-07 05:49:00,2308.7,21.4,-46.9,3.74,88.0,2.4
2018-04-07 06:09:00,2272.7,15.2,-47.07,3.94,110.0,2.0
2018-04-07 06:29:00,2312.5,32.1,-47.07,3.46,88.0,1.7
2018-04-07 06:49:00,2335.2,20.0,-47.31,3.29,44.0,1.7
2018-04-07 07:09:00,2262.1,16.5,-46.86,3.54,132.0,1.4
2018-04-07 07:28:00,2235.9,13.7,-46.79,3.73,132.0,3.4
2018-04-07 07:44:00,2209.4,21.2,-46.55,3.29,88.0,3.4
2018-04-07 09:38:00,nan,nan,nan,nan,132.0,1.4
2018-04-07 10:05:00,2072.7,13.0,-46.81,3.57,264.0,2.7
2018-04-07 10:18:00,2053.8,11.4,-46.57,3.97,44.0,3.1
2018-04-07 10:38:00,2038.6,13.4,-46.12,4.05,132.0,2.4
2018-04-07 10:58:00,2033.1,6.7,-46.1,4.07,132.0,3.4
2018-04-07 11:19:00,2036.0,7.5,-46.17,3.85,132.0,2.7
2018-04-07 11:39:00,2031.8,5.7,-46.14,4.11,220.0,3.1
2018-04-07 11:59:00,2029.7,7.3,-46.67,4.16,176.0,3.7
2018-04-07 12:18:00,2029.8,9.6,-46.1,4.09,264.0,3.4
2018-04-07 12:38:00,2033.3,10.1,-46.05,3.71,308.0,1.7
2018-04-07 12:58:00,2028.5,6.4,-46.07,4.04,220.0,5.4
2018-04-07 13:18:00,2039.0,11.0,-46.52,3.66,220.0,4.1
2018-04-07 13:39:00,2035.4,7.0,-45.81,3.89,176.0,3.1
2018-04-07 13:59:00,2036.8,9.5,-46.34,3.61,176.0,1.4
2018-04-07 14:19:00,2033.6,5.6,-45.97,3.8,286.0,1.4
2018-04-07 14:39:00,2040.1,7.3,-46.4,3.99,220.0,5.1
2018-04-07 14:58:00,2048.7,7.2,-46.46,3.74,264.0,3.4
2018-04-07 15:18:00,2064.1,9.7,-46.31,3.9,176.0,3.1
2018-04-07 15:38:00,2071.9,7.8,-46.43,4.01,176.0,3.1
2018-04-07 15:58:00,2085.3,6.6,-46.3,4.03,154.0,3.4
2018-04-07 16:18:00,2090.3,9.2,-46.68,3.93,264.0,4.4
2018-04-07 16:38:00,2085.5,6.8,-46.48,4.2,286.0,2.4
2018-04-07 16:58:00,2078.9,6.0,-46.46,4.02,176.0,1.4
2018-04-07 17:18:00,2081.6,6.7,-46.75,3.92,88.0,3.4
2018-04-07 17:38:00,2096.0,6.3,-46.38,3.85,220.0,1.4
2018-04-07 17:58:00,2099.3,9.7,-46.16,3.97,176.0,3.1
2018-04-07 18:18:00,2107.0,9.4,-46.95,3.69,176.0,3.7
2018-04-07 18:39:00,2117.1,8.4,-46.55,3.66,176.0,2.0
2018-04-07 18:59:00,2142.3,10.9,-46.56,4.1,44.0,1.0
2018-04-07 19:14:00,2159.2,5.8,-46.28,3.41,132.0,1.4
2018-04-07 21:10:00,2134.1,10.6,-46.17,3.61,220.0,0.7
2018-04-07 21:30:00,2106.7,11.3,-46.62,3.93,220.0,2.0
2018-04-07 21:49:00,2119.2,9.7,-46.8,3.77,44.0,0.3
2018-04-07 22:09:00,2126.3,14.1,-46.27,4.15,44.0,0.0
2018-04-07 22:29:00,2114.4,10.7,-46.62,3.88,176.0,0.7
2018-04-07 22:49:00,2097.5,7.0,-46.43,3.61,0.0,1.0
2018-04-07 23:09:00,2086.5,9.3,-46.68,3.75,242.0,1.7
2018-04-07 23:29:00,2079.5,9.4,-46.35,4.1,220.0,1.7
2018-04-07 23:49:00,2070.9,10.8,-46.3,3.77,176.0,0.7
2018-04-08 00:09:00,2072.5,12.7,-46.32,4.06,176.0,0.3
2018-04-08 00:29:00,2090.7,12.5,-46.07,3.98,220.0,2.0
2018-04-08 00:50:00,2100.6,10.4,-46.03,3.73,176.0,1.4
2018-04-08 01:10:00,2098.5,13.0,-45.84,4.12,308.0,0.7
2018-04-08 01:30:00,2100.9,9.5,-46.43,3.94,264.0,1.7
2018-04-08 01:50:00,2099.6,9.2,-46.27,4.0,308.0,1.0
2018-04-08 02:10:00,2124.8,19.9,-45.89,3.82,0.0,0.7
2018-04-08 02:30:00,2118.0,14.2,-46.59,3.88,198.0,1.0
2018-04-08 02:50:00,2109.5,20.2,-45.95,3.71,264.0,1.0
2018-04-08 03:10:00,2118.7,9.6,-46.7,3.8,154.0,1.0
2018-04-08 03:30:00,2147.2,17.4,-46.21,3.77,132.0,1.0
2018-04-08 03:50:00,2148.2,17.9,-46.12,3.82,176.0,0.7
2018-04-08 04:10:00,2160.9,9.1,-45.95,3.71,176.0,0.7
2018-04-08 04:29:00,2150.6,8.7,-45.99,3.72,176.0,1.4
2018-04-08 04:49:00,2144.6,11.2,-46.24,4.11,132.0,1.0
2018-04-08 05:10:00,2153.4,11.3,-46.28,3.7,264.0,1.4
2018-04-08 05:29:00,2191.7,17.6,-46.23,3.88,308.0,0.0
2018-04-08 05:49:00,2265.1,38.5,-46.2,3.69,176.0,0.3
2018-04-08 06:10:00,2317.2,18.6,-46.18,3.4,132.0,0.0
2018-04-08 06:30:00,2353.0,10.6,-46.02,3.44,220.0,0.3
2018-04-08 06:49:00,2328.1,22.7,-46.0,3.46,264.0,0.7
2018-04-08 07:10:00,2310.3,15.5,-45.64,3.53,220.0,1.0
2018-04-08 07:29:00,2319.5,16.2,-45.93,3.3,132.0,0.7
2018-04-08 07:45:00,2283.3,13.5,-45.86,3.77,88.0,0.7
2018-04-08 09:40:00,2339.1,14.7,-46.06,3.44,264.0,0.7
2018-04-08 10:00:00,2318.3,14.5,-45.81,3.44,88.0,0.0
2018-04-08 10:20:00,2258.3,61.2,-45.67,3.74,132.0,0.3
2018-04-08 10:39:00,2241.6,78.0,-45.03,3.64,176.0,0.7
2018-04-08 11:00:00,2180.1,33.7,-45.8,3.76,0.0,0.3
2018-04-08 11:19:00,2146.9,21.5,-45.45,3.87,220.0,0.0
2018-04-08 11:40:00,2077.9,45.6,-46.07,3.69,308.0,1.4
2018-04-08 12:00:00,2100.9,7.9,-45.7,3.64,264.0,1.4
2018-04-08 12:20:00,2098.9,13.7,-45.59,3.91,264.0,0.3
2018-04-08 12:40:00,2106.1,5.7,-45.44,3.88,0.0,0.0
2018-04-08 13:00:00,2094.2,22.9,-45.31,3.77,0.0,1.4
2018-04-08 13:19:00,2086.1,12.6,-45.48,3.89,0.0,2.0
2018-04-08 13:39:00,2099.6,6.5,-45.49,3.82,264.0,0.7
2018-04-08 13:59:00,2116.0,4.6,-45.33,3.93,286.0,0.3
2018-04-08 14:19:00,2137.3,12.6,-45.3,4.06,308.0,0.7
2018-04-08 14:39:00,2127.7,7.8,-45.28,3.96,220.0,0.3
2018-04-08 14:59:00,2129.6,9.6,-45.67,3.88,132.0,0.3
2018-04-08 15:19:00,2154.3,9.2,-45.62,3.9,44.0,0.7
2018-04-08 15:39:00,2150.5,13.5,-46.39,3.76,286.0,2.0
2018-04-08 15:59:00,2143.5,11.3,-45.9,3.49,154.0,0.3
2018-04-08 16:19:00,2138.0,9.5,-45.73,3.84,44.0,1.0
2018-04-08 16:39:00,2115.8,6.8,-45.71,3.81,0.0,1.4
2018-04-08 17:00:00,2097.1,5.5,-45.69,3.83,44.0,1.7
2018-04-08 17:19:00,2094.3,5.4,-45.48,3.67,176.0,1.4
2018-04-08 17:40:00,2107.2,4.4,-46.08,3.79,0.0,1.7
2018-04-08 18:00:00,2109.1,4.1,-46.44,4.11,0.0,1.4
2018-04-08 18:20:00,2105.0,2.3,-46.14,3.83,44.0,2.0
2018-04-08 18:39:00,2108.6,6.7,-46.3,4.01,88.0,1.0
2018-04-08 18:59:00,2132.9,11.0,-46.11,4.09,308.0,1.4
2018-04-08 19:15:00,2151.2,5.1,-46.09,3.61,176.0,0.7
2018-04-08 21:11:00,2088.6,2.8,-46.09,3.82,308.0,2.0
2018-04-08 21:30:00,2089.0,6.3,-46.37,3.98,44.0,1.7
2018-04-08 21:50:00,2081.5,6.3,-46.04,3.71,0.0,2.0
2018-04-08 22:10:00,2076.4,5.6,-46.06,3.76,88.0,0.3
2018-04-08 22:31:00,2069.7,5.9,-46.2,3.91,44.0,3.1
2018-04-08 22:51:00,2060.3,2.5,-46.55,3.88,0.0,0.7
2018-04-08 23:10:00,2065.8,7.5,-46.35,3.72,44.0,2.4
2018-04-08 23:30:00,2073.5,4.3,-46.21,3.87,22.0,2.0
2018-04-08 23:50:00,2068.6,2.6,-46.39,4.28,44.0,2.7
2018-04-09 00:10:00,2074.8,3.2,-46.05,4.14,0.0,1.0
2018-04-09 00:30:00,2086.6,5.2,-46.32,4.0,308.0,1.4
2018-04-09 00:51:00,2095.3,3.8,-46.27,3.89,308.0,1.7
2018-04-09 01:11:00,2105.7,4.7,-46.47,4.06,286.0,2.4
2018-04-09 01:30:00,2095.4,2.6,-46.71,3.99,0.0,2.0
2018-04-09 01:50:00,2091.8,3.3,-46.88,4.0,308.0,1.7
2018-04-09 02:10:00,2094.0,3.9,-46.3,3.88,88.0,0.3
2018-04-09 02:31:00,2090.3,16.2,-46.45,3.87,22.0,2.7
2018-04-09 02:50:00,2086.9,8.7,-46.74,3.96,44.0,2.0
2018-04-09 03:10:00,2085.8,2.6,-46.32,3.71,22.0,1.7
2018-04-09 03:31:00,2086.6,3.9,-46.23,3.65,44.0,1.4
2018-04-09 03:51:00,2084.9,4.5,-46.32,4.0,264.0,1.7
2018-04-09 04:10:00,2093.0,7.7,-46.95,3.96,308.0,0.7
2018-04-09 04:30:00,2080.9,4.4,-47.07,3.73,0.0,1.7
2018-04-09 04:50:00,2077.5,3.7,-46.63,3.96,66.0,0.7
2018-04-09 05:11:00,2078.9,3.7,-46.64,4.17,0.0,2.4
2018-04-09 05:30:00,2079.8,6.1,-46.82,3.79,308.0,2.7
2018-04-09 05:50:00,2073.9,5.5,-46.9,3.87,88.0,0.3
2018-04-09 06:11:00,2068.3,3.6,-46.99,4.11,44.0,2.7
2018-04-09 06:31:00,2070.2,7.3,-46.81,3.76,308.0,2.7
2018-04-09 06:51:00,2074.3,7.4,-46.59,4.06,176.0,1.0
2018-04-09 07:11:00,2093.5,13.4,-47.1,3.69,308.0,2.0
2018-04-09 07:30:00,2095.3,6.3,-46.81,3.77,22.0,1.0
2018-04-09 07:46:00,2089.3,1.8,-46.86,3.91,0.0,1.7
2018-04-09 09:40:00,2136.6,42.5,-46.17,3.69,88.0,2.4
2018-04-09 10:00:00,2170.4,70.3,-46.16,3.98,88.0,1.4
2018-04-09 10:20:00,2139.8,27.3,-46.24,3.94,44.0,3.1
2018-04-09 10:40:00,2147.9,35.4,-46.54,3.56,66.0,3.1
2018-04-09 11:01:00,2145.1,35.0,-46.35,4.1,132.0,1.0
2018-04-09 11:20:00,2105.4,21.0,-46.5,4.02,88.0,2.4
2018-04-09 11:40:00,2110.8,23.4,-46.7,3.86,88.0,2.4
2018-04-09 12:00:00,2131.3,39.8,-46.24,4.0,88.0,3.4
2018-04-09 12:20:00,2144.9,30.8,-46.29,3.54,44.0,2.7
2018-04-09 12:40:00,2151.5,41.2,-46.15,3.75,22.0,2.4
2018-04-09 13:01:00,2123.7,14.5,-46.78,3.62,110.0,3.4
2018-04-09 13:20:00,2113.2,2.4,-47.41,3.76,88.0,1.4
2018-04-09 13:41:00,2120.0,8.5,-47.11,3.76,88.0,2.0
2018-04-09 14:01:00,2163.2,25.1,-46.99,3.75,154.0,4.4
2018-04-09 14:21:00,2154.0,9.8,-46.84,3.71,88.0,3.1
2018-04-09 14:41:00,2099.1,8.1,-46.81,3.9,88.0,3.1
2018-04-09 15:00:00,2085.9,18.3,-46.27,3.98,88.0,2.7
2018-04-09 15:20:00,2052.5,10.8,-46.71,3.89,132.0,3.4
2018-04-09 15:41:00,2053.9,17.6,-46.36,4.08,132.0,3.4
2018-04-09 16:00:00,2058.9,11.4,-46.5,3.95,88.0,1.7
2018-04-09 16:20:00,2061.5,18.4,-46.33,4.06,88.0,2.0
2018-04-09 16:41:00,2062.1,23.1,-46.34,4.12,44.0,4.1
2018-04-09 17:00:00,2047.0,4.0,-46.5,3.92,88.0,2.0
2018-04-09 17:20:00,2049.2,7.0,-46.33,4.04,88.0,2.4
2018-04-09 17:41:00,2058.5,6.7,-46.76,4.03,22.0,2.4
2018-04-09 18:01:00,2070.7,9.3,-46.39,4.11,88.0,3.4
2018-04-09 18:20:00,2079.4,13.2,-46.36,3.92,132.0,2.0
2018-04-09 18:41:00,2083.0,13.5,-46.09,3.94,88.0,2.7
2018-04-09 19:01:00,2090.9,18.9,-46.37,3.87,88.0,2.7
2018-04-09 19:16:00,2083.9,15.8,-45.8,3.78,132.0,3.1
2018-04-09 21:12:00,2176.2,20.8,-46.19,4.07,110.0,3.1
2018-04-09 21:32:00,2248.6,31.4,-46.61,3.58,88.0,2.7
2018-04-09 21:51:00,2238.8,20.4,-46.39,3.59,88.0,2.4
2018-04-09 22:11:00,2235.0,18.4,-46.12,3.6,88.0,2.0
2018-04-09 22:32:00,2261.2,16.5,-46.67,3.61,88.0,2.0
2018-04-09 22:52:00,2292.7,12.8,-47.12,3.84,88.0,2.0
2018-04-09 23:12:00,2294.6,35.0,-46.67,3.58,132.0,2.0
2018-04-09 23:32:00,2259.4,22.2,-46.62,3.77,88.0,2.4
2018-04-09 23:52:00,2246.6,21.6,-46.14,3.85,88.0,2.0
2018-04-10 00:12:00,2223.2,6.1,-46.1,3.73,88.0,2.0
2018-04-10 00:32:00,2231.0,32.8,-46.38,3.64,66.0,1.4
2018-04-10 00:52:00,2232.2,17.8,-45.68,3.57,88.0,3.1
2018-04-10 01:11:00,2209.5,13.3,-45.77,3.48,66.0,0.7
2018-04-10 01:32:00,2156.7,18.9,-45.57,3.84,88.0,1.4
2018-04-10 01:52:00,2122.7,6.0,-45.46,3.93,44.0,1.0
2018-04-10 02:12:00,2104.8,11.7,-45.22,3.94,132.0,1.7
2018-04-10 02:31:00,2094.4,8.2,-45.57,4.08,44.0,2.0
2018-04-10 02:51:00,2090.6,8.9,-45.06,3.92,0.0,1.4
2018-04-10 03:12:00,2095.4,25.3,-44.98,4.06,44.0,1.7
2018-04-10 03:31:00,2088.8,20.7,-44.98,3.86,0.0,1.4
2018-04-10 03:52:00,2092.1,9.7,-45.49,4.01,264.0,0.7
2018-04-10 04:11:00,2121.0,25.3,-44.54,4.15,44.0,2.4
2018-04-10 04:31:00,2159.3,41.9,-44.56,3.64,44.0,2.0
2018-04-10 04:51:00,2120.0,14.4,-44.87,3.73,44.0,2.0
2018-04-10 05:11:00,2108.9,21.0,-44.76,3.62,88.0,1.7
2018-04-10 05:32:00,2120.0,42.2,-44.63,3.97,44.0,1.4
2018-04-10 05:52:00,2131.3,49.2,-44.81,3.95,88.0,3.1
2018-04-10 06:12:00,2115.5,44.3,-45.06,3.87,66.0,2.7
2018-04-10 06:32:00,2068.2,21.0,-45.02,4.08,66.0,2.7
2018-04-10 06:52:00,2062.6,21.5,-45.3,4.0,44.0,1.7
2018-04-10 07:12:00,2053.2,10.5,-45.19,4.05,44.0,3.1
2018-04-10 07:31:00,2088.8,35.9,-45.26,3.68,308.0,0.7
2018-04-10 07:47:00,2062.4,7.8,-45.51,4.15,88.0,2.4
2018-04-10 09:41:00,2080.6,23.2,-45.47,3.77,44.0,0.7
2018-04-10 10:02:00,2074.0,21.4,-45.64,3.76,132.0,1.0
2018-04-10 10:22:00,2051.6,11.8,-45.82,3.98,176.0,3.1
2018-04-10 10:41:00,2056.3,4.5,-45.66,4.16,88.0,1.7
2018-04-10 11:01:00,2062.3,11.3,-45.79,3.77,88.0,3.4
2018-04-10 11:21:00,2086.1,13.4,-45.61,3.56,44.0,2.4
2018-04-10 11:41:00,2098.4,15.6,-45.88,3.85,88.0,1.7
2018-04-10 12:01:00,2092.2,37.6,-45.79,3.77,88.0,0.7
2018-04-10 12:21:00,2087.7,49.1,-45.47,4.25,44.0,1.7
2018-04-10 12:41:00,2103.6,30.9,-45.15,3.95,66.0,2.0
2018-04-10 13:02:00,2075.3,7.0,-45.07,3.91,44.0,1.4
2018-04-10 13:21:00,2087.9,38.3,-45.23,4.19,308.0,2.0
2018-04-10 13:41:00,2066.6,17.7,-45.15,4.14,132.0,2.7
2018-04-10 14:02:00,2101.6,56.9,-44.8,3.94,88.0,2.7
2018-04-10 14:22:00,2096.4,45.9,-45.14,3.94,44.0,1.7
2018-04-10 14:42:00,2062.7,35.0,-45.21,4.13,44.0,3.1
2018-04-10 15:02:00,2109.5,52.7,-44.84,3.8,0.0,3.4
2018-04-10 15:21:00,2093.8,31.8,-44.87,3.99,44.0,2.7
2018-04-10 15:41:00,2095.9,35.8,-45.11,4.06,132.0,3.1
2018-04-10 16:01:00,2125.2,59.9,-44.84,4.0,44.0,2.7
2018-04-10 16:22:00,2127.5,68.7,-44.94,3.86,44.0,3.4
2018-04-10 16:42:00,2177.4,66.3,-45.08,3.95,132.0,4.8
2018-04-10 17:02:00,2126.0,34.8,-45.07,3.73,110.0,2.0
2018-04-10 17:21:00,2147.6,48.1,-45.22,3.63,88.0,2.7
2018-04-10 17:41:00,2157.6,34.8,-44.78,3.47,44.0,2.4
2018-04-10 18:02:00,2183.0,53.8,-45.47,3.57,44.0,3.4
2018-04-10 18:22:00,2196.2,39.2,-44.48,3.95,44.0,3.1
2018-04-10 18:42:00,2164.8,40.6,-45.01,3.91,132.0,1.7
2018-04-10 19:02:00,2113.8,5.6,-45.61,3.87,308.0,1.4
2018-04-10 19:17:00,2120.8,2.7,-45.5,4.09,88.0,0.3
2018-04-10 21:13:00,2212.0,22.7,-45.33,3.56,0.0,1.0
2018-04-10 21:33:00,2195.0,19.4,-45.27,3.78,66.0,3.4
2018-04-10 21:53:00,2179.4,11.9,-45.78,3.87,0.0,2.4
2018-04-10 22:13:00,2190.6,20.4,-45.54,3.71,66.0,2.0
2018-04-10 22:33:00,2194.2,41.0,-45.15,3.74,44.0,3.1
2018-04-10 22:52:00,2180.7,3.3,-45.19,3.96,176.0,1.4
2018-04-10 23:12:00,2187.1,11.0,-45.44,3.78,264.0,0.7
2018-04-10 23:32:00,2183.4,12.6,-45.1,3.61,88.0,1.4
2018-04-10 23:53:00,2177.7,5.8,-45.38,3.89,0.0,2.0
2018-04-11 00:13:00,2175.0,3.1,-45.38,3.91,0.0,1.4
2018-04-11 00:33:00,2181.0,5.0,-45.51,3.97,44.0,1.0
2018-04-11 00:53:00,2179.3,2.9,-46.02,3.61,44.0,2.0
2018-04-11 01:12:00,2169.2,1.3,-46.64,3.91,0.0,1.7
2018-04-11 01:32:00,2170.6,3.0,-46.49,3.75,44.0,2.4
2018-04-11 01:52:00,2178.9,5.4,-46.08,3.66,88.0,2.0
2018-04-11 02:13:00,2187.0,13.5,-46.36,3.73,44.0,1.4
2018-04-11 02:32:00,2203.3,22.6,-46.23,3.68,88.0,1.7
2018-04-11 02:52:00,2232.8,38.2,-46.08,3.57,0.0,1.7
2018-04-11 03:13:00,2228.3,28.9,-46.25,3.63,88.0,0.3
2018-04-11 03:33:00,2222.5,17.5,-46.53,3.47,44.0,0.7
2018-04-11 03:52:00,2253.4,19.4,-46.38,3.59,44.0,0.7
2018-04-11 04:12:00,2249.6,9.9,-46.74,3.59,0.0,1.0
2018-04-11 04:33:00,2260.2,7.5,-46.63,3.73,88.0,0.7
2018-04-11 04:53:00,2254.9,8.4,-46.53,3.57,44.0,0.7
2018-04-11 05:12:00,2275.3,12.5,-46.74,3.62,0.0,1.4
2018-04-11 05:33:00,2227.2,7.4,-47.18,3.67,0.0,1.7
2018-04-11 05:52:00,2198.5,14.6,-46.88,3.67,110.0,1.7
2018-04-11 06:12:00,2161.0,11.1,-46.79,3.77,88.0,2.4
2018-04-11 06:32:00,2123.6,12.2,-46.84,3.81,44.0,2.7
2018-04-11 06:52:00,2108.5,8.5,-46.72,3.86,22.0,2.4
2018-04-11 07:13:00,2083.1,7.4,-45.91,3.86,0.0,4.1
2018-04-11 07:33:00,2057.3,5.5,-46.47,3.77,88.0,2.7
2018-04-11 07:48:00,2044.1,3.6,-46.12,4.05,88.0,3.1
2018-04-11 09:43:00,2067.0,38.8,-45.8,3.66,22.0,2.4
2018-04-11 10:03:00,2048.6,19.5,-45.73,3.99,176.0,1.7
2018-04-11 10:23:00,2030.1,7.2,-46.44,4.11,0.0,1.7
2018-04-11 10:42:00,2035.4,3.5,-46.36,4.09,44.0,1.7
2018-04-11 11:02:00,2053.8,16.0,-46.48,4.16,176.0,0.7
2018-04-11 11:22:00,2039.1,3.4,-45.97,4.2,0.0,1.7
2018-04-11 11:42:00,2042.0,2.9,-45.84,4.23,0.0,2.4
2018-04-11 12:03:00,2044.4,3.0,-46.17,4.13,0.0,1.0
2018-04-11 12:23:00,2048.0,4.3,-45.97,4.13,0.0,1.4
2018-04-11 12:43:00,2048.0,3.8,-46.05,4.14,0.0,3.4
2018-04-11 13:03:00,2077.1,27.0,-45.59,3.67,0.0,1.7
2018-04-11 13:22:00,2061.5,20.5,-45.97,3.94,308.0,0.7
2018-04-11 13:42:00,2051.1,7.4,-45.87,3.85,44.0,1.0
2018-04-11 14:03:00,2053.5,5.4,-46.33,3.97,330.0,1.7
2018-04-11 14:23:00,2050.3,4.3,-46.28,3.84,88.0,2.0
2018-04-11 14:43:00,2047.2,3.9,-46.27,3.73,44.0,1.4
2018-04-11 15:03:00,2046.6,3.1,-46.29,3.82,132.0,1.0
2018-04-11 15:22:00,2052.7,5.4,-46.04,3.98,44.0,1.0
2018-04-11 15:42:00,2050.1,6.2,-46.02,3.96,44.0,2.7
2018-04-11 16:03:00,2051.7,5.8,-45.95,4.03,66.0,0.7
2018-04-11 16:23:00,2045.5,6.3,-46.47,3.87,308.0,2.7
2018-04-11 16:43:00,2041.8,2.3,-46.16,3.77,44.0,1.4
2018-04-11 17:02:00,2049.4,3.1,-46.13,3.97,44.0,1.7
2018-04-11 17:22:00,2057.0,5.4,-45.96,3.97,264.0,3.1
2018-04-11 17:42:00,2061.6,5.1,-46.6,4.03,44.0,1.0
2018-04-11 18:02:00,2074.3,35.9,-46.05,3.83,132.0,1.0
2018-04-11 18:22:00,2071.7,7.6,-46.07,3.68,88.0,2.0
2018-04-11 18:43:00,2066.8,6.7,-46.32,4.2,0.0,1.7
2018-04-11 19:03:00,2085.1,31.3,-46.57,3.69,308.0,1.4
2018-04-11 19:18:00,2157.7,61.9,-45.63,3.89,132.0,2.0
2018-04-11 21:13:00,2117.8,12.6,-46.09,3.73,220.0,1.0
2018-04-11 21:34:00,2102.7,5.6,-46.58,3.92,44.0,2.0
2018-04-11 21:54:00,2114.5,3.3,-46.4,3.77,88.0,1.7
2018-04-11 22:14:00,2132.8,7.1,-46.12,3.58,0.0,1.0
2018-04-11 22:33:00,2145.2,5.0,-46.03,3.76,44.0,1.4
2018-04-11 22:54:00,2156.7,8.7,-45.74,3.9,0.0,1.0
2018-04-11 23:14:00,2159.6,6.2,-45.91,3.91,308.0,1.0
2018-04-11 23:34:00,2166.4,18.9,-46.11,3.43,44.0,0.7
2018-04-11 23:53:00,2148.2,11.3,-45.9,3.93,132.0,1.0
2018-04-12 00:13:00,2145.6,10.4,-45.85,3.77,0.0,0.0
2018-04-12 00:34:00,2126.5,2.9,-45.86,3.66,0.0,1.7
2018-04-12 00:54:00,2115.0,2.7,-46.39,3.88,44.0,2.0
2018-04-12 01:14:00,2123.2,4.6,-46.25,4.13,0.0,1.4
2018-04-12 01:34:00,2128.3,5.1,-45.98,3.66,44.0,1.0
2018-04-12 01:54:00,2128.5,2.8,-45.99,4.09,44.0,1.7
2018-04-12 02:13:00,2132.3,14.8,-45.9,4.01,44.0,2.7
2018-04-12 02:33:00,2100.4,3.0,-45.92,3.72,88.0,1.4
2018-04-12 02:53:00,2101.0,4.0,-46.05,3.78,132.0,2.4
2018-04-12 03:14:00,2089.8,8.5,-46.1,3.85,44.0,1.0
2018-04-12 03:34:00,2072.0,6.6,-45.98,3.77,44.0,2.4
2018-04-12 03:54:00,2081.3,5.9,-45.59,4.14,44.0,1.4
2018-04-12 04:13:00,2085.7,5.2,-46.12,3.92,0.0,1.4
2018-04-12 04:33:00,2087.6,6.4,-46.09,3.78,22.0,0.7
2018-04-12 04:54:00,2094.7,8.2,-46.23,3.83,308.0,1.4
2018-04-12 05:13:00,2071.1,9.7,-46.11,4.18,308.0,1.7
2018-04-12 05:33:00,2065.8,6.0,-46.38,3.99,264.0,1.0
2018-04-12 05:54:00,2051.5,11.2,-46.13,4.1,44.0,1.4
2018-04-12 06:13:00,2037.5,4.5,-46.24,4.09,88.0,0.7
2018-04-12 06:33:00,2054.7,5.2,-46.55,3.97,264.0,0.7
2018-04-12 06:53:00,2045.0,6.2,-46.18,4.18,132.0,0.7
2018-04-12 07:13:00,2039.5,5.0,-46.15,3.96,0.0,1.0
2018-04-12 07:33:00,2029.9,5.3,-46.33,4.13,88.0,1.0
2018-04-12 07:49:00,2032.5,3.3,-46.58,3.95,330.0,1.4
2018-04-12 09:43:00,2044.1,4.0,-46.47,4.07,44.0,1.7
2018-04-12 09:58:00,2060.8,5.3,-47.21,4.12,0.0,1.7
2018-04-12 10:50:00,2067.5,9.2,-46.8,3.7,0.0,1.7
2018-04-12 11:10:00,2071.8,4.0,-46.34,4.0,88.0,1.7
2018-04-12 11:31:00,2080.0,6.3,-46.24,3.66,308.0,1.7
2018-04-12 11:50:00,2089.0,3.5,-46.83,4.02,176.0,1.7
2018-04-12 12:10:00,2095.6,5.1,-46.26,4.05,44.0,3.1
2018-04-12 12:30:00,2101.9,3.9,-46.7,4.21,308.0,1.4
2018-04-12 12:48:00,2098.9,5.9,-46.71,3.86,0.0,1.7
2018-04-12 15:13:00,2095.9,6.4,-45.96,3.83,0.0,2.0
2018-04-12 15:32:00,2104.2,4.5,-47.28,3.84,66.0,1.0
2018-04-12 15:52:00,2101.1,6.5,-46.9,3.8,176.0,1.0
2018-04-12 16:12:00,2090.6,3.8,-46.37,4.18,308.0,2.0
2018-04-12 16:32:00,2074.5,6.5,-46.3,3.87,0.0,1.7
2018-04-12 16:48:00,2056.1,3.9,-45.86,4.18,44.0,2.0
2018-04-12 18:43:00,2018.4,5.8,-47.06,4.07,44.0,0.7
2018-04-12 19:03:00,2026.9,4.3,-46.81,4.19,88.0,1.4
2018-04-12 19:22:00,2025.0,5.1,-46.51,3.77,88.0,1.7
2018-04-12 19:42:00,2019.8,7.4,-46.81,4.25,0.0,0.7
2018-04-12 20:02:00,2016.4,6.5,-46.67,3.84,308.0,1.7
2018-04-12 20:23:00,2014.5,3.5,-46.94,4.09,44.0,1.7
2018-04-12 20:43:00,2019.9,6.0,-46.85,4.04,308.0,1.7
2018-04-12 21:03:00,2016.1,9.6,-46.89,4.27,88.0,2.0
2018-04-12 21:23:00,2021.4,7.4,-46.53,3.98,330.0,0.7
2018-04-12 21:43:00,2028.0,4.9,-46.75,4.01,0.0,1.4
2018-04-12 22:03:00,2024.4,6.2,-46.57,3.85,132.0,0.7
2018-04-12 22:23:00,2018.1,5.5,-46.73,4.07,44.0,0.3
2018-04-12 22:43:00,2030.2,10.2,-46.32,3.81,286.0,1.7
2018-04-12 23:02:00,2028.6,6.0,-46.67,4.16,286.0,1.0
2018-04-12 23:22:00,2022.0,11.3,-46.95,3.88,66.0,0.7
2018-04-12 23:42:00,2028.8,8.8,-46.66,4.0,264.0,1.4
2018-04-13 00:03:00,2030.3,5.3,-46.88,3.93,308.0,1.4
2018-04-13 00:23:00,2028.7,5.0,-46.48,4.03,220.0,0.3
2018-04-13 00:42:00,2025.8,4.9,-46.52,4.04,44.0,0.7
2018-04-13 01:02:00,2022.2,7.2,-46.68,3.94,308.0,0.7
2018-04-13 01:23:00,2029.7,4.4,-47.09,3.96,44.0,0.7
2018-04-13 01:42:00,2025.4,10.9,-46.77,3.73,264.0,1.4
2018-04-13 02:02:00,2040.3,13.4,-46.71,4.0,308.0,1.0
2018-04-13 02:22:00,2057.0,12.4,-46.71,3.9,264.0,1.4
2018-04-13 02:42:00,2064.5,13.9,-46.7,4.06,0.0,1.0
2018-04-13 03:02:00,2066.5,17.6,-46.5,3.78,308.0,1.7
2018-04-13 03:22:00,2047.1,10.8,-46.87,4.04,264.0,1.4
2018-04-13 03:43:00,2044.1,13.3,-47.23,3.74,308.0,1.0
2018-04-13 04:02:00,2052.1,7.7,-46.75,3.7,0.0,1.0
2018-04-13 04:22:00,2057.4,13.5,-46.71,3.73,308.0,1.4
2018-04-13 04:42:00,2069.8,20.1,-46.97,3.81,330.0,1.4
2018-04-13 05:03:00,2061.2,9.7,-46.78,4.11,0.0,1.7
2018-04-13 05:18:00,2068.3,5.6,-47.08,3.99,308.0,0.7
2018-04-13 07:12:00,2084.2,16.5,-46.87,3.89,0.0,0.7
2018-04-13 07:32:00,2108.7,6.9,-46.91,3.68,198.0,1.7
2018-04-13 07:53:00,2114.1,5.5,-46.57,4.0,308.0,2.0
2018-04-13 08:13:00,2127.6,10.3,-46.66,3.71,264.0,0.3
2018-04-13 08:32:00,2118.2,7.0,-46.9,3.82,264.0,1.7
2018-04-13 08:52:00,2096.7,6.8,-47.22,3.77,220.0,2.0
2018-04-13 09:13:00,2078.6,6.8,-47.13,4.04,308.0,1.7
2018-04-13 09:33:00,2082.8,6.9,-47.15,3.91,264.0,2.0
2018-04-13 09:53:00,2085.1,9.9,-47.24,3.77,220.0,2.0
2018-04-13 10:12:00,2077.0,5.5,-47.05,4.01,176.0,1.4
2018-04-13 10:32:00,2081.8,7.1,-47.32,3.84,308.0,2.0
2018-04-13 10:52:00,2080.3,6.5,-47.29,3.78,220.0,1.4
2018-04-13 11:13:00,2069.3,7.8,-47.51,3.83,308.0,2.0
2018-04-13 11:33:00,2076.7,6.6,-47.17,3.75,0.0,1.7
2018-04-13 11:53:00,2070.1,8.5,-47.39,3.85,242.0,2.0
2018-04-13 12:13:00,2064.8,3.6,-47.65,3.98,220.0,1.7
2018-04-13 12:33:00,2060.7,5.9,-47.43,3.91,132.0,1.4
2018-04-13 12:53:00,2058.7,3.7,-47.15,3.71,220.0,1.4
2018-04-13 13:12:00,2053.7,7.7,-47.26,3.74,264.0,1.7
2018-04-13 13:32:00,2038.8,5.5,-47.26,3.87,220.0,3.1
2018-04-13 13:52:00,2044.2,4.3,-47.09,4.09,220.0,1.4
2018-04-13 14:13:00,2056.8,8.3,-47.34,3.86,220.0,1.0
2018-04-13 14:32:00,2052.2,14.2,-47.66,4.2,198.0,2.0
2018-04-13 14:52:00,2115.5,53.4,-46.44,3.74,132.0,1.4
2018-04-13 15:13:00,2123.2,34.4,-46.44,3.67,220.0,1.7
2018-04-13 15:33:00,2087.0,8.0,-47.04,3.89,176.0,2.4
2018-04-13 15:53:00,2097.2,7.6,-46.87,4.18,176.0,2.0
2018-04-13 16:12:00,2078.2,10.0,-46.76,3.78,176.0,2.0
2018-04-13 16:32:00,2071.7,9.1,-47.05,4.08,176.0,0.7
2018-04-13 16:48:00,2063.7,7.6,-47.34,3.62,220.0,1.4
2018-04-13 18:43:00,2076.2,19.9,-46.71,4.2,264.0,1.0
2018-04-13 19:03:00,2111.7,11.3,-46.89,4.07,220.0,1.4
2018-04-13 19:24:00,2123.6,6.0,-47.08,3.92,198.0,0.7
2018-04-13 19:44:00,2109.1,7.0,-46.73,3.85,264.0,2.0
2018-04-13 20:04:00,2102.1,5.1,-46.66,3.82,220.0,1.7
2018-04-13 20:24:00,2112.5,7.5,-46.88,3.76,132.0,2.0
2018-04-13 20:43:00,2111.0,5.7,-46.74,3.78,176.0,1.7
2018-04-13 21:04:00,2117.1,6.0,-46.53,3.76,264.0,2.0
2018-04-13 21:23:00,2118.4,8.5,-46.74,3.65,176.0,1.4
2018-04-13 21:43:00,2117.5,9.8,-46.79,3.88,220.0,0.7
2018-04-13 22:03:00,2121.0,10.8,-46.56,3.7,220.0,1.7
2018-04-13 22:23:00,2135.4,8.4,-46.48,3.72,176.0,1.0
2018-04-13 22:43:00,2145.5,12.1,-46.75,4.09,220.0,0.7
2018-04-13 23:04:00,2135.3,6.2,-46.89,3.77,132.0,1.7
2018-04-13 23:23:00,2164.4,22.8,-46.7,4.01,220.0,0.3
2018-04-13 23:44:00,2180.3,8.4,-46.15,3.79,176.0,0.7
2018-04-14 00:03:00,2162.8,15.0,-45.92,3.8,308.0,1.7
2018-04-14 00:24:00,2149.2,6.4,-46.23,3.56,264.0,0.7
2018-04-14 00:43:00,2149.8,11.9,-46.57,3.73,264.0,1.4
2018-04-14 01:03:00,2165.1,8.4,-46.7,3.88,264.0,0.7
2018-04-14 01:23:00,2187.5,11.9,-46.3,3.61,220.0,1.0
2018-04-14 01:43:00,2205.2,13.0,-46.53,3.64,264.0,0.0
2018-04-14 02:03:00,2209.6,21.0,-46.5,3.85,198.0,0.7
2018-04-14 02:24:00,2205.9,11.2,-46.35,3.72,176.0,0.3
2018-04-14 02:44:00,2175.0,9.2,-46.44,3.6,0.0,0.7
2018-04-14 03:04:00,2174.4,10.5,-46.22,3.57,286.0,0.7
2018-04-14 03:23:00,2192.5,15.0,-46.46,3.97,176.0,0.7
2018-04-14 03:43:00,2211.3,13.0,-46.4,3.62,308.0,1.4
2018-04-14 04:04:00,2218.8,12.5,-46.56,3.78,264.0,0.7
2018-04-14 04:24:00,2242.6,13.9,-46.37,3.7,264.0,0.7
2018-04-14 04:44:00,2275.5,6.9,-46.0,3.43,308.0,1.0
2018-04-14 05:04:00,2332.2,16.5,-46.06,3.46,176.0,1.0
2018-04-14 05:19:00,2349.8,10.4,-45.9,3.94,264.0,0.3
2018-04-14 07:13:00,2235.0,33.6,-46.23,3.6,264.0,1.0
2018-04-14 07:34:00,2208.6,15.9,-46.03,3.74,176.0,1.0
2018-04-14 07:54:00,2185.1,6.6,-46.46,4.04,220.0,0.3
2018-04-14 08:13:00,2234.4,41.4,-46.02,3.56,44.0,0.3
2018-04-14 08:33:00,2338.3,64.8,-46.01,3.53,132.0,2.7
2018-04-14 08:53:00,2215.4,47.7,-46.46,3.45,264.0,1.7
2018-04-14 09:14:00,2165.9,30.9,-46.52,3.78,44.0,0.7
2018-04-14 09:33:00,2173.5,39.8,-46.47,3.79,220.0,0.3
2018-04-14 09:53:00,2125.3,58.8,-46.5,3.66,264.0,0.7
2018-04-14 10:13:00,2105.8,50.2,-46.44,3.72,88.0,0.7
2018-04-14 10:33:00,2066.4,29.5,-46.72,3.91,0.0,2.0
2018-04-14 10:54:00,2050.8,16.5,-46.87,3.99,308.0,1.0
2018-04-14 11:14:00,2132.2,106.5,-46.03,4.1,44.0,1.4
2018-04-14 11:34:00,2034.8,9.1,-46.67,3.95,176.0,2.0
2018-04-14 11:54:00,2059.9,40.2,-46.49,4.01,264.0,1.7
2018-04-14 12:13:00,2032.4,7.0,-46.44,4.11,132.0,0.7
2018-04-14 12:33:00,2043.2,15.3,-46.63,4.12,308.0,1.0
2018-04-14 12:54:00,2057.1,53.6,-46.81,4.23,132.0,0.3
2018-04-14 13:13:00,2041.6,37.8,-46.74,4.06,0.0,2.0
2018-04-14 13:33:00,2037.8,35.2,-47.36,4.42,176.0,2.4
2018-04-14 13:53:00,2064.8,51.5,-46.72,3.96,220.0,0.7
2018-04-14 14:14:00,2013.4,5.8,-47.0,3.92,132.0,1.7
2018-04-14 14:34:00,2065.9,77.3,-46.81,3.93,132.0,2.4
2018-04-14 14:53:00,2039.6,30.5,-47.04,3.9,88.0,2.0
2018-04-14 15:13:00,2023.6,10.4,-47.68,4.16,44.0,2.0
2018-04-14 15:34:00,2109.7,65.7,-46.78,3.99,132.0,4.8
2018-04-14 15:54:00,2075.1,27.1,-47.01,3.91,88.0,4.1
2018-04-14 16:14:00,2054.9,15.0,-47.15,3.94,44.0,2.0
2018-04-14 16:33:00,2053.7,18.0,-47.15,3.97,44.0,4.1
2018-04-14 16:49:00,2087.7,32.8,-46.75,4.12,44.0,1.4
2018-04-14 18:45:00,2130.3,12.4,-47.0,3.78,44.0,3.1
2018-04-14 19:05:00,2153.4,37.1,-46.92,3.77,110.0,2.4
2018-04-14 19:24:00,2162.5,13.5,-46.87,3.84,44.0,2.0
2018-04-14 19:44:00,2189.7,16.5,-46.68,3.63,88.0,1.7
2018-04-14 20:05:00,2188.9,5.6,-46.88,3.57,44.0,1.7
2018-04-14 20:25:00,2202.2,8.6,-46.65,3.85,176.0,1.4
2018-04-14 20:44:00,2231.7,5.8,-46.79,3.63,132.0,1.4
2018-04-14 21:04:00,2223.4,7.9,-46.67,3.53,44.0,2.4
2018-04-14 21:24:00,2238.6,5.1,-46.89,3.7,132.0,2.4
2018-04-14 21:45:00,2238.1,4.5,-46.58,3.79,22.0,0.7
2018-04-14 22:04:00,2261.2,6.8,-46.7,3.5,132.0,1.7
2018-04-14 22:24:00,2250.4,10.3,-46.27,3.66,88.0,3.1
2018-04-14 22:44:00,2286.1,10.0,-46.65,3.85,132.0,1.7
2018-04-14 23:05:00,2313.3,10.3,-46.93,3.93,132.0,1.7
2018-04-14 23:25:00,2353.3,35.2,-46.72,3.6,88.0,1.7
2018-04-14 23:44:00,2343.9,11.3,-46.57,3.44,44.0,2.0
2018-04-15 00:04:00,2314.2,8.8,-46.88,3.47,88.0,2.4
2018-04-15 00:25:00,2319.7,6.6,-47.28,3.36,88.0,2.4
2018-04-15 00:44:00,2308.2,12.4,-47.0,3.17,132.0,1.4
2018-04-15 01:04:00,2293.5,7.3,-46.89,3.71,88.0,2.4
2018-04-15 01:25:00,2276.9,13.5,-46.77,3.51,88.0,3.1
2018-04-15 01:45:00,2248.0,13.3,-47.07,3.51,88.0,2.0
2018-04-15 02:05:00,2223.5,10.0,-46.89,3.77,88.0,2.4
2018-04-15 02:25:00,2206.9,5.5,-46.63,4.01,44.0,2.4
2018-04-15 02:44:00,2213.5,6.5,-46.97,3.6,44.0,1.4
2018-04-15 03:04:00,2204.7,6.4,-47.22,3.48,88.0,2.0
2018-04-15 03:25:00,2222.6,6.0,-46.44,3.62,44.0,1.0
2018-04-15 03:45:00,2228.7,14.8,-46.59,3.46,132.0,2.7
2018-04-15 04:04:00,2269.3,5.6,-46.65,3.49,88.0,3.4
2018-04-15 04:24:00,2275.0,14.1,-46.89,3.64,44.0,1.7
2018-04-15 04:45:00,2249.4,5.7,-46.93,3.7,22.0,2.4
2018-04-15 05:05:00,2252.7,5.9,-46.82,3.8,44.0,2.4
2018-04-15 05:20:00,2231.4,9.8,-46.81,3.73,132.0,3.1
2018-04-15 07:15:00,2327.8,8.8,-46.68,3.46,132.0,2.0
2018-04-15 07:35:00,2354.3,8.8,-46.55,3.42,88.0,1.4
2018-04-15 07:54:00,2314.7,17.6,-46.33,3.24,132.0,1.7
2018-04-15 08:14:00,2246.9,23.7,-45.97,3.53,88.0,2.7
2018-04-15 08:34:00,2172.7,36.0,-46.36,3.87,198.0,1.4
2018-04-15 08:55:00,2154.1,58.7,-45.86,3.71,176.0,2.4
2018-04-15 09:15:00,2097.7,6.2,-46.59,3.77,0.0,2.0
2018-04-15 09:34:00,2078.8,9.8,-46.36,3.89,176.0,4.1
2018-04-15 09:55:00,2080.8,6.6,-46.09,4.08,220.0,1.7
2018-04-15 10:15:00,2085.4,7.7,-46.35,3.95,132.0,3.1
2018-04-15 10:35:00,2087.7,6.9,-46.1,3.9,220.0,2.7
2018-04-15 10:55:00,2088.4,10.1,-46.69,3.99,220.0,1.7
2018-04-15 11:15:00,2090.9,6.0,-46.89,3.9,132.0,1.0
2018-04-15 11:35:00,2135.2,48.3,-45.85,3.71,308.0,1.4
2018-04-15 11:54:00,2173.3,87.1,-46.42,3.81,176.0,3.7
2018-04-15 12:15:00,2107.3,8.7,-47.08,3.77,176.0,2.4
2018-04-15 12:34:00,2080.8,9.2,-46.68,4.23,308.0,1.0
2018-04-15 12:54:00,2067.6,14.8,-46.77,4.2,176.0,3.4
2018-04-15 13:14:00,2057.0,8.1,-46.18,4.09,176.0,5.1
2018-04-15 13:35:00,2062.5,13.2,-46.8,3.67,264.0,3.4
2018-04-15 13:54:00,2060.0,9.6,-46.56,4.14,132.0,4.4
2018-04-15 14:14:00,2071.0,27.2,-46.8,4.1,132.0,3.4
2018-04-15 14:34:00,2042.6,25.1,-46.07,3.9,132.0,2.4
2018-04-15 14:54:00,2018.4,9.7,-46.76,4.05,198.0,2.4
2018-04-15 15:15:00,2015.5,9.6,-46.44,4.11,198.0,4.1
2018-04-15 15:34:00,2011.4,6.4,-46.09,4.16,88.0,3.1
2018-04-15 15:55:00,2027.6,7.1,-46.44,4.01,220.0,3.1
2018-04-15 16:15:00,2009.9,10.2,-46.36,3.76,176.0,2.7
2018-04-15 16:35:00,2030.3,13.6,-46.45,4.08,176.0,3.7
2018-04-15 16:50:00,2057.3,5.9,-45.71,3.78,220.0,4.1
2018-04-15 18:45:00,2068.2,11.1,-46.46,3.67,176.0,3.1
2018-04-15 19:05:00,2068.6,8.7,-46.29,4.26,132.0,3.7
2018-04-15 19:25:00,2064.6,8.0,-46.4,3.73,198.0,2.7
2018-04-15 19:45:00,2088.9,25.5,-45.79,3.97,176.0,2.0
2018-04-15 20:05:00,2078.4,11.6,-45.95,4.12,220.0,1.7
2018-04-15 20:25:00,2063.7,5.1,-46.3,4.15,88.0,2.0
2018-04-15 20:45:00,2071.5,5.9,-46.24,3.52,176.0,3.1
2018-04-15 21:05:00,2075.1,7.3,-46.5,3.92,176.0,2.4
2018-04-15 21:25:00,2059.5,9.6,-46.48,4.03,176.0,2.7
2018-04-15 21:45:00,2037.0,5.7,-46.2,3.7,132.0,3.1
2018-04-15 22:06:00,2033.6,9.8,-46.55,3.82,176.0,4.1
2018-04-15 22:26:00,2031.5,7.5,-46.43,3.91,176.0,3.7
2018-04-15 22:46:00,2017.9,6.0,-46.22,3.75,264.0,1.0
2018-04-15 23:05:00,2005.7,4.6,-46.34,4.01,264.0,2.4
2018-04-15 23:25:00,2004.4,4.4,-46.42,4.0,220.0,1.7
2018-04-15 23:45:00,1997.1,5.0,-46.34,4.25,220.0,0.7
2018-04-16 00:05:00,1994.5,7.5,-46.69,3.63,308.0,2.0
2018-04-16 00:25:00,1997.3,6.5,-46.4,4.14,220.0,3.4
2018-04-16 00:45:00,1996.7,5.5,-46.42,4.21,242.0,3.4
2018-04-16 01:05:00,1997.5,3.6,-46.61,4.23,176.0,2.7
2018-04-16 01:25:00,1999.2,6.9,-46.75,3.84,264.0,1.0
2018-04-16 01:46:00,2004.0,6.3,-46.12,3.91,0.0,1.4
2018-04-16 02:06:00,2003.8,5.0,-46.36,4.15,176.0,1.0
2018-04-16 02:25:00,1998.7,9.7,-46.58,4.02,220.0,2.0
2018-04-16 02:45:00,1996.5,4.7,-46.59,3.92,264.0,3.1
2018-04-16 03:06:00,1996.9,6.2,-46.33,4.21,220.0,2.0
2018-04-16 03:26:00,1994.7,4.6,-46.7,4.17,220.0,1.0
2018-04-16 03:46:00,2003.3,3.2,-46.83,4.04,264.0,2.4
2018-04-16 04:06:00,2000.9,4.8,-46.86,3.83,264.0,1.7
2018-04-16 04:25:00,2008.7,3.6,-47.22,3.98,176.0,2.4
2018-04-16 04:46:00,2027.1,6.3,-46.51,3.9,176.0,1.7
2018-04-16 05:06:00,2028.9,6.9,-47.13,4.28,220.0,1.4
2018-04-16 05:21:00,2012.6,5.0,-46.63,3.98,264.0,1.4
2018-04-16 07:15:00,1988.3,6.2,-46.79,3.98,264.0,2.4
2018-04-16 07:35:00,1980.2,4.4,-46.83,4.08,308.0,3.7
2018-04-16 07:55:00,1981.3,3.0,-47.07,4.11,220.0,2.0
2018-04-16 08:16:00,1983.8,3.6,-46.61,4.05,286.0,3.1
2018-04-16 08:36:00,1973.7,5.4,-47.02,4.24,308.0,4.4
2018-04-16 08:56:00,1968.4,3.2,-46.84,4.17,220.0,3.1
2018-04-16 09:16:00,1963.7,3.5,-47.05,4.18,220.0,3.1
2018-04-16 09:36:00,1961.9,2.7,-46.8,4.09,264.0,2.4
2018-04-16 09:55:00,1965.9,3.5,-46.71,4.28,220.0,4.1
2018-04-16 10:15:00,1966.6,3.9,-47.02,4.01,220.0,4.8
2018-04-16 10:35:00,1967.6,5.1,-46.74,4.15,88.0,3.1
2018-04-16 10:55:00,1966.7,6.2,-47.34,3.72,220.0,3.1
2018-04-16 11:15:00,1969.1,5.0,-47.32,3.93,176.0,2.7
2018-04-16 11:35:00,1967.3,5.8,-46.92,4.09,264.0,3.1
2018-04-16 11:56:00,1961.3,4.1,-47.29,4.25,176.0,3.4
2018-04-16 12:16:00,1959.4,5.8,-47.13,3.81,88.0,3.1
2018-04-16 12:36:00,1961.4,5.1,-46.94,4.07,220.0,2.7
2018-04-16 12:56:00,1965.1,5.5,-47.28,4.17,264.0,2.4
2018-04-16 13:16:00,1969.1,5.3,-47.11,4.04,220.0,4.4
2018-04-16 13:36:00,1966.9,5.2,-47.0,4.11,220.0,4.4
2018-04-16 13:55:00,1964.5,5.3,-46.87,3.81,0.0,4.1
2018-04-16 14:16:00,1966.3,4.3,-47.18,3.97,176.0,5.4
2018-04-16 14:36:00,1967.2,5.0,-47.4,4.15,220.0,3.7
2018-04-16 14:55:00,1966.6,4.3,-47.14,4.01,176.0,5.4
2018-04-16 15:16:00,1966.9,3.9,-47.27,4.15,308.0,4.4
2018-04-16 15:36:00,1965.3,4.5,-47.29,4.34,0.0,3.7
2018-04-16 15:55:00,1960.7,2.5,-47.27,4.32,176.0,7.5
2018-04-16 16:15:00,1963.7,4.0,-47.93,3.93,176.0,3.7
2018-04-16 16:35:00,1964.8,7.7,-47.0,4.22,88.0,3.1
2018-04-16 16:51:00,1963.7,3.3,-47.48,4.41,264.0,3.1
2018-04-16 18:46:00,1981.4,5.3,-47.57,3.71,308.0,2.0
2018-04-16 19:06:00,1989.4,8.1,-47.5,3.99,220.0,2.4
2018-04-16 19:26:00,2002.1,4.2,-47.52,4.0,176.0,2.0
2018-04-16 19:47:00,2022.3,11.9,-47.09,3.91,176.0,0.7
2018-04-16 20:06:00,2034.0,9.7,-46.73,4.11,176.0,2.0
2018-04-16 20:27:00,2050.6,25.4,-46.79,3.98,88.0,1.7
2018-04-16 20:46:00,2114.6,30.4,-46.97,3.88,176.0,3.7
2018-04-16 21:06:00,2153.7,12.6,-47.21,3.7,22.0,3.1
2018-04-16 21:27:00,2084.1,15.5,-47.33,3.97,132.0,3.1
2018-04-16 21:47:00,2068.3,8.1,-47.05,3.81,154.0,3.1
2018-04-16 22:06:00,2110.0,31.6,-47.55,3.96,132.0,2.4
2018-04-16 22:27:00,2152.4,15.8,-48.2,3.61,176.0,2.4
2018-04-16 22:47:00,2095.6,22.7,-47.87,4.02,176.0,2.7
2018-04-16 23:07:00,2075.8,14.2,-47.46,3.97,66.0,1.7
2018-04-16 23:27:00,2102.9,12.8,-47.75,4.05,132.0,3.1
2018-04-16 23:47:00,2087.3,19.7,-47.38,4.2,132.0,2.0
2018-04-17 00:06:00,2081.5,10.2,-48.09,3.85,176.0,5.1
2018-04-17 00:27:00,2052.9,12.5,-47.78,3.56,88.0,2.7
2018-04-17 00:46:00,2039.0,13.1,-47.59,3.82,132.0,3.1
2018-04-17 01:07:00,2034.2,13.8,-47.59,3.82,132.0,3.7
2018-04-17 01:27:00,2028.9,6.8,-47.46,4.19,132.0,3.1
2018-04-17 01:47:00,2030.3,5.1,-47.32,3.76,176.0,4.4
2018-04-17 02:07:00,2056.5,10.6,-47.18,3.8,176.0,1.4
2018-04-17 02:26:00,2024.6,8.2,-47.11,3.96,176.0,3.4
2018-04-17 02:47:00,2036.3,21.2,-46.82,4.22,44.0,4.1
2018-04-17 03:07:00,2027.2,8.8,-47.22,4.35,176.0,2.7
2018-04-17 03:27:00,2023.3,9.8,-46.83,4.0,154.0,1.7
2018-04-17 03:46:00,2036.7,14.4,-47.1,3.93,176.0,4.8
2018-04-17 04:06:00,2044.6,13.0,-46.7,4.01,176.0,3.4
2018-04-17 04:26:00,2033.6,8.6,-47.3,3.79,132.0,3.1
2018-04-17 04:47:00,2029.5,9.4,-47.06,3.86,176.0,1.0
2018-04-17 05:07:00,2040.1,9.9,-47.0,3.59,132.0,4.1
2018-04-17 05:22:00,2048.4,5.5,-47.42,3.84,110.0,3.1
2018-04-17 07:16:00,2032.4,8.0,-47.39,3.87,132.0,2.4
2018-04-17 07:36:00,2042.3,11.0,-47.29,3.81,176.0,5.1
2018-04-17 07:56:00,2026.8,7.2,-46.98,4.08,176.0,5.1
2018-04-17 08:17:00,2032.9,9.1,-47.11,3.79,264.0,2.0
2018-04-17 08:37:00,2019.9,9.1,-47.5,4.23,132.0,5.1
2018-04-17 08:56:00,2018.7,5.8,-47.37,3.89,132.0,2.0
2018-04-17 09:17:00,2013.9,6.3,-47.59,3.93,88.0,3.1
2018-04-17 09:37:00,1997.4,5.2,-47.23,4.3,286.0,2.0
2018-04-17 09:56:00,2004.7,6.3,-46.82,3.8,264.0,2.0
2018-04-17 10:16:00,2007.8,6.5,-47.28,4.07,264.0,4.1
2018-04-17 10:36:00,2003.2,5.0,-47.08,3.81,176.0,3.4
2018-04-17 10:56:00,1984.8,7.3,-47.02,3.93,176.0,5.8
2018-04-17 11:17:00,1984.8,3.2,-47.51,3.95,286.0,3.4
2018-04-17 11:37:00,1992.9,5.9,-47.28,3.97,308.0,2.4
2018-04-17 11:57:00,1981.9,4.7,-47.17,4.35,220.0,7.8
2018-04-17 12:16:00,1984.7,8.2,-46.86,3.86,220.0,4.8
2018-04-17 12:36:00,1978.8,2.7,-46.89,4.21,220.0,9.2
2018-04-17 12:56:00,1977.2,3.7,-47.11,4.03,308.0,5.8
2018-04-17 13:17:00,1974.9,2.7,-47.15,4.32,220.0,6.5
2018-04-17 13:37:00,1981.3,4.5,-47.13,4.1,176.0,7.1
2018-04-17 13:57:00,1982.8,3.1,-46.82,3.87,176.0,6.5
2018-04-17 14:17:00,1981.5,2.9,-46.98,4.31,220.0,5.1
2018-04-17 14:37:00,1980.8,4.2,-47.19,4.18,176.0,4.4
2018-04-17 14:56:00,1989.9,5.9,-46.91,4.31,264.0,3.7
2018-04-17 15:16:00,1982.6,4.9,-46.36,3.94,220.0,4.1
2018-04-17 15:36:00,1975.7,3.9,-46.24,4.07,132.0,7.8
2018-04-17 15:56:00,1969.7,4.2,-46.69,3.95,220.0,5.1
2018-04-17 16:17:00,1973.2,4.9,-46.63,4.02,220.0,2.7
2018-04-17 16:37:00,1966.4,3.0,-46.62,4.31,264.0,5.8
2018-04-17 16:52:00,1970.5,6.1,-46.48,4.57,242.0,2.4
2018-04-17 18:48:00,1978.9,5.7,-45.45,4.34,176.0,4.8
2018-04-17 19:08:00,1977.2,4.0,-46.29,4.16,198.0,3.4
2018-04-17 19:28:00,1984.1,5.4,-45.76,3.98,308.0,4.1
2018-04-17 19:47:00,1979.9,6.5,-46.01,4.42,264.0,5.8
2018-04-17 20:07:00,1985.8,4.9,-45.63,3.95,0.0,1.7
2018-04-17 20:28:00,1992.0,8.0,-45.32,4.11,220.0,2.0
2018-04-17 20:48:00,2015.5,7.1,-45.54,4.43,176.0,2.7
2018-04-17 21:08:00,2004.6,7.3,-45.9,4.06,176.0,0.7
2018-04-17 21:28:00,2000.6,6.1,-45.6,3.91,132.0,5.4
2018-04-17 21:48:00,2009.0,8.0,-45.72,4.09,132.0,1.4
2018-04-17 22:08:00,2017.2,10.8,-45.79,4.34,176.0,2.0
2018-04-17 22:27:00,2038.8,13.7,-45.63,4.08,264.0,1.7
2018-04-17 22:47:00,2053.4,17.5,-45.56,3.94,132.0,0.3
2018-04-17 23:07:00,2075.2,12.7,-45.7,3.95,176.0,2.4
2018-04-17 23:28:00,2091.9,26.0,-45.76,3.79,88.0,0.0
2018-04-17 23:48:00,2082.8,6.5,-45.42,3.82,176.0,0.0
2018-04-18 00:08:00,2080.4,14.5,-45.48,4.11,220.0,1.7
2018-04-18 00:28:00,2076.6,12.2,-45.14,4.14,176.0,0.7
2018-04-18 00:47:00,2084.6,13.1,-45.71,4.03,154.0,1.4
2018-04-18 01:08:00,2083.4,11.9,-45.84,3.97,198.0,0.7
2018-04-18 01:28:00,2082.1,10.1,-45.65,3.78,198.0,1.7
2018-04-18 01:48:00,2086.9,8.2,-46.1,3.67,132.0,1.0
2018-04-18 02:08:00,2114.3,22.0,-45.44,3.81,220.0,1.7
2018-04-18 02:28:00,2109.5,17.1,-45.5,3.75,176.0,1.4
2018-04-18 02:48:00,2128.7,12.0,-45.91,3.73,264.0,0.3
2018-04-18 03:08:00,2109.6,8.7,-45.63,3.76,220.0,1.0
2018-04-18 03:27:00,2083.7,10.3,-46.22,3.78,220.0,1.7
2018-04-18 03:47:00,2070.9,6.4,-46.21,3.99,220.0,1.7
2018-04-18 04:07:00,2071.7,3.6,-45.82,4.07,176.0,1.4
2018-04-18 04:27:00,2074.8,6.7,-45.35,3.76,264.0,1.4
2018-04-18 04:48:00,2069.5,6.2,-46.12,3.94,176.0,1.4
2018-04-18 05:08:00,2071.5,6.2,-45.98,3.75,308.0,0.3
2018-04-18 05:23:00,2080.4,10.0,-46.38,3.87,132.0,0.7
2018-04-18 07:17:00,2138.2,8.4,-45.61,3.88,88.0,1.7
2018-04-18 07:38:00,2095.9,18.8,-45.59,3.98,220.0,1.4
2018-04-18 07:57:00,2027.6,14.9,-45.96,4.04,198.0,2.0
2018-04-18 08:17:00,2006.6,9.8,-45.51,3.91,264.0,0.3
2018-04-18 08:37:00,1992.5,6.4,-45.42,4.29,176.0,0.3
2018-04-18 08:58:00,1990.0,9.1,-45.46,4.23,132.0,1.0
2018-04-18 09:18:00,1978.0,7.8,-45.22,4.2,132.0,2.7
2018-04-18 09:38:00,1978.2,5.4,-45.19,4.07,220.0,1.0
2018-04-18 09:58:00,1975.5,15.0,-45.25,4.3,330.0,2.7
2018-04-18 10:17:00,1969.0,10.8,-45.11,4.25,264.0,2.4
2018-04-18 10:37:00,1954.7,6.1,-45.36,4.27,220.0,3.1
2018-04-18 10:58:00,1989.1,46.7,-44.82,4.35,198.0,1.7
2018-04-18 11:17:00,1958.0,7.3,-45.27,4.09,198.0,2.0
2018-04-18 11:38:00,1971.7,23.1,-45.46,4.17,176.0,3.7
2018-04-18 11:58:00,1985.0,20.4,-45.7,4.02,110.0,1.4
2018-04-18 12:18:00,1974.1,23.3,-45.58,4.11,220.0,1.7
2018-04-18 12:37:00,1979.2,37.8,-45.19,4.26,132.0,3.4
2018-04-18 12:57:00,1987.5,61.1,-45.28,3.73,242.0,3.4
2018-04-18 13:17:00,1983.4,39.2,-45.6,4.09,132.0,4.1
2018-04-18 13:34:00,1979.5,26.2,-45.18,4.02,88.0,2.7
2018-04-18 15:04:00,2012.7,57.0,-45.68,4.04,242.0,2.0
2018-04-18 15:18:00,1987.5,22.9,-45.81,3.84,88.0,3.7
2018-04-18 16:05:00,2020.8,60.0,-45.71,3.86,264.0,3.4
2018-04-18 16:26:00,2018.0,35.6,-47.03,4.05,88.0,1.0
2018-04-18 16:45:00,2004.4,28.8,-46.93,4.19,88.0,4.4
2018-04-18 17:05:00,2046.7,49.0,-46.88,4.13,176.0,3.1
2018-04-18 17:25:00,2018.0,32.8,-46.95,4.14,88.0,2.4
2018-04-18 17:41:00,2037.2,38.8,-47.22,4.54,220.0,2.4
2018-04-18 19:35:00,2102.5,24.3,-46.81,4.0,88.0,2.0
2018-04-18 19:55:00,2161.7,9.9,-46.76,3.95,132.0,1.7
2018-04-18 20:16:00,2221.1,16.7,-46.77,3.73,110.0,1.4
2018-04-18 20:36:00,2290.3,48.4,-46.86,3.59,88.0,1.7
2018-04-18 20:55:00,2263.1,19.1,-46.59,4.02,132.0,2.4
2018-04-18 21:15:00,2262.6,16.3,-46.47,3.8,88.0,1.4
2018-04-18 21:35:00,2274.4,16.9,-46.58,3.88,88.0,3.1
2018-04-18 21:56:00,2286.0,39.8,-46.51,3.37,132.0,1.7
2018-04-18 22:16:00,2238.8,9.5,-46.77,3.27,132.0,2.0
2018-04-18 22:35:00,2228.4,6.2,-46.53,3.61,132.0,2.7
2018-04-18 22:56:00,2244.0,12.9,-46.68,3.13,44.0,1.7
2018-04-18 23:16:00,2245.0,11.6,-46.57,3.78,88.0,2.4
2018-04-18 23:35:00,2211.3,8.6,-46.91,3.57,88.0,2.4
2018-04-18 23:55:00,2187.7,6.1,-46.85,3.93,88.0,2.7
2018-04-19 00:16:00,2174.8,4.6,-46.39,3.67,132.0,2.0
2018-04-19 00:36:00,2207.4,21.9,-46.5,3.85,44.0,2.0
2018-04-19 00:55:00,2263.6,10.7,-46.43,3.69,88.0,2.4
2018-04-19 01:15:00,2335.2,36.9,-46.54,3.43,110.0,2.0
2018-04-19 01:36:00,2412.4,9.1,-46.36,3.25,0.0,1.0
2018-04-19 01:56:00,2381.1,16.6,-45.98,3.47,88.0,2.0
2018-04-19 02:16:00,2343.9,11.4,-46.77,3.29,132.0,2.0
2018-04-19 02:36:00,2342.1,3.5,-47.01,3.53,88.0,0.7
2018-04-19 02:56:00,2336.0,4.7,-46.47,3.82,176.0,1.4
2018-04-19 03:15:00,2325.7,6.8,-46.91,3.51,88.0,1.7
2018-04-19 03:35:00,2326.7,9.9,-46.82,3.3,88.0,2.4
2018-04-19 03:55:00,2366.0,10.5,-46.62,3.5,88.0,1.4
2018-04-19 04:15:00,2391.0,8.1,-46.84,3.45,88.0,2.0
2018-04-19 04:35:00,2525.9,82.7,-46.68,3.11,176.0,0.3
2018-04-19 04:55:00,2602.4,10.9,-45.75,3.02,264.0,0.0
2018-04-19 05:16:00,2630.6,14.4,-46.18,3.08,308.0,0.7
2018-04-19 05:35:00,2740.8,56.0,-45.55,2.88,88.0,1.4
2018-04-19 05:56:00,2702.4,34.5,-45.64,3.05,132.0,1.7
2018-04-19 06:11:00,2745.2,18.6,-46.16,3.06,264.0,0.0
2018-04-19 08:05:00,2428.3,100.8,-45.16,3.38,88.0,0.3
2018-04-19 08:25:00,2429.6,88.0,-45.5,3.49,220.0,0.3
2018-04-19 08:45:00,2356.8,56.1,-45.45,3.57,264.0,0.7
2018-04-19 09:05:00,2310.8,23.1,-45.61,3.51,0.0,0.3
2018-04-19 09:25:00,2410.0,113.8,-45.17,3.32,0.0,0.0
2018-04-19 09:45:00,2374.1,60.9,-45.5,3.69,88.0,1.0
2018-04-19 10:06:00,2309.0,46.8,-45.67,3.45,132.0,0.7
2018-04-19 10:26:00,2234.2,26.8,-45.49,3.51,88.0,1.7
2018-04-19 10:46:00,2240.8,71.0,-45.24,3.64,132.0,1.4
2018-04-19 11:06:00,2247.5,86.8,-45.51,3.57,220.0,1.0
2018-04-19 11:25:00,2169.8,39.6,-45.57,3.85,88.0,1.7
2018-04-19 11:46:00,2167.5,50.4,-45.99,3.53,nan,1.7
2018-04-19 12:06:00,2137.0,56.4,-45.72,3.76,nan,1.0
2018-04-19 12:23:00,2037.8,24.2,-45.88,4.15,176.0,0.7
2018-04-19 16:38:00,2023.7,20.0,-46.14,4.0,132.0,0.7
2018-04-19 16:58:00,2014.8,14.1,-46.76,4.16,132.0,2.0
2018-04-19 17:18:00,2013.2,12.0,-46.38,4.08,132.0,1.0
2018-04-19 17:37:00,2005.8,9.8,-46.93,4.18,308.0,1.0
2018-04-19 17:57:00,2015.3,14.3,-46.29,3.98,220.0,1.0
2018-04-19 18:13:00,2042.8,24.8,-46.52,4.06,220.0,3.4
2018-04-19 20:08:00,2127.6,11.6,-46.18,3.93,132.0,1.0
2018-04-19 20:28:00,2125.5,13.6,-45.43,4.14,176.0,0.3
2018-04-19 20:48:00,2101.7,11.0,-45.99,3.78,308.0,1.7
2018-04-19 21:08:00,2118.4,13.7,-46.2,3.72,176.0,0.7
2018-04-19 21:27:00,2143.6,8.7,-46.1,3.96,264.0,1.4
2018-04-19 21:47:00,2137.2,10.6,-45.87,3.71,220.0,2.4
2018-04-19 22:08:00,2134.2,11.8,-46.23,3.94,286.0,0.7
2018-04-19 22:28:00,2124.1,8.1,-45.85,3.91,0.0,1.7
2018-04-19 22:48:00,2144.9,10.5,-45.45,3.96,220.0,2.4
2018-04-19 23:08:00,2175.2,9.1,-45.75,3.88,308.0,1.0
2018-04-19 23:28:00,2174.2,11.3,-45.54,3.56,198.0,0.7
2018-04-19 23:47:00,2183.4,6.7,-45.69,3.81,286.0,1.7
2018-04-20 00:07:00,2180.2,7.0,-45.83,3.69,264.0,0.7
2018-04-20 00:27:00,2179.8,12.7,-45.25,3.55,220.0,1.0
2018-04-20 00:47:00,2200.4,12.6,-45.53,3.94,0.0,1.0
2018-04-20 01:07:00,2179.0,10.2,-45.51,3.8,264.0,1.4
2018-04-20 01:27:00,2190.2,9.9,-45.52,3.81,220.0,1.0
2018-04-20 01:48:00,2201.6,8.1,-45.76,4.04,264.0,1.4
2018-04-20 02:08:00,2185.6,10.7,-45.64,3.81,264.0,2.0
2018-04-20 02:27:00,2211.2,28.2,-45.29,3.83,264.0,1.4
2018-04-20 02:47:00,2193.7,24.5,-45.68,3.68,88.0,1.7
2018-04-20 03:07:00,2170.1,9.1,-45.88,3.69,264.0,1.0
2018-04-20 03:27:00,2201.1,9.3,-45.9,3.67,264.0,0.7
2018-04-20 03:48:00,2212.7,12.5,-45.48,3.8,308.0,0.3
2018-04-20 04:07:00,2249.0,15.1,-45.35,3.71,308.0,0.3
2018-04-20 04:27:00,2273.1,20.0,-45.29,3.57,308.0,0.3
2018-04-20 04:48:00,2208.5,17.5,-45.74,3.82,264.0,1.4
2018-04-20 05:07:00,2232.5,14.2,-44.96,3.79,264.0,1.7
2018-04-20 05:27:00,2299.5,37.6,-45.27,3.62,0.0,1.4
2018-04-20 05:48:00,2429.8,30.5,-45.27,3.2,264.0,1.7
2018-04-20 06:08:00,2497.4,14.4,-44.89,3.41,286.0,0.7
2018-04-20 06:28:00,2523.9,6.2,-44.91,3.17,220.0,1.0
2018-04-20 06:43:00,2502.5,17.0,-45.28,3.06,264.0,1.7
2018-04-20 08:37:00,2274.7,12.5,-45.64,3.36,308.0,1.0
2018-04-20 08:57:00,2260.3,16.9,-45.52,3.55,264.0,2.0
2018-04-20 09:18:00,2212.6,30.3,-45.88,3.82,264.0,1.4
2018-04-20 09:38:00,2199.3,9.8,-45.45,3.73,308.0,1.7
2018-04-20 09:55:00,2236.1,11.1,-45.11,3.54,176.0,1.7
2018-04-20 17:25:00,1998.2,8.8,-45.66,4.3,264.0,1.0
2018-04-20 17:46:00,2022.9,20.5,-45.65,4.09,264.0,2.7
2018-04-20 18:06:00,2025.4,11.0,-45.28,4.2,308.0,2.4
2018-04-20 18:25:00,2013.5,7.2,-44.92,4.36,0.0,2.7
2018-04-20 18:45:00,2011.2,6.9,-44.34,4.21,88.0,2.4
2018-04-20 19:01:00,2000.9,3.5,-44.61,4.35,0.0,2.4
2018-04-20 20:55:00,2201.4,18.3,-45.11,4.14,88.0,3.1
2018-04-20 21:15:00,2211.2,11.1,-45.3,3.99,0.0,2.4
2018-04-20 21:35:00,2220.5,17.4,-45.01,3.9,176.0,2.4
2018-04-20 21:55:00,2182.4,18.9,-44.43,4.16,88.0,2.0
2018-04-20 22:15:00,2149.3,22.5,-44.59,3.96,0.0,1.7
2018-04-20 22:36:00,2165.7,48.7,-44.07,4.49,0.0,4.1
2018-04-20 22:56:00,2095.2,16.1,-44.16,4.22,44.0,1.0
2018-04-20 23:16:00,2073.5,19.4,-43.89,4.25,88.0,3.1
2018-04-20 23:36:00,2072.8,13.9,-44.14,4.52,88.0,2.7
2018-04-20 23:56:00,2098.4,14.9,-44.7,4.38,110.0,1.7
2018-04-21 00:16:00,2122.1,4.9,-44.8,4.12,132.0,3.4
2018-04-21 00:35:00,2121.6,6.6,-44.92,3.99,88.0,1.7
2018-04-21 00:56:00,2104.6,7.3,-45.46,4.23,88.0,3.4
2018-04-21 01:15:00,2111.5,6.4,-44.96,3.92,132.0,1.7
2018-04-21 01:36:00,2135.8,24.5,-45.13,4.32,88.0,1.4
2018-04-21 01:55:00,2157.9,17.7,-45.21,4.25,88.0,3.7
2018-04-21 02:15:00,2212.9,24.1,-45.71,4.02,66.0,2.7
2018-04-21 02:36:00,2195.1,22.9,-45.4,4.09,132.0,0.3
2018-04-21 02:56:00,2176.8,13.3,-45.42,3.96,44.0,2.7
2018-04-21 03:16:00,2210.2,30.9,-45.03,4.1,44.0,2.0
2018-04-21 03:35:00,2124.1,24.2,-45.12,4.18,88.0,3.7
2018-04-21 03:55:00,2122.8,16.5,-44.9,4.09,66.0,1.7
2018-04-21 04:16:00,2112.1,7.2,-45.24,4.14,88.0,2.0
2018-04-21 04:35:00,2104.9,9.1,-45.48,4.31,66.0,2.4
2018-04-21 04:55:00,2107.6,11.9,-45.32,4.18,154.0,3.4
2018-04-21 05:16:00,2098.6,4.5,-45.41,3.86,88.0,2.0
2018-04-21 05:35:00,2107.1,6.4,-45.8,3.89,132.0,2.7
2018-04-21 05:55:00,2140.2,7.4,-45.64,3.92,88.0,1.4
2018-04-21 06:15:00,2143.6,8.3,-45.94,4.03,88.0,2.4
2018-04-21 06:35:00,2165.0,11.4,-45.98,3.98,110.0,1.4
2018-04-21 06:56:00,2185.8,6.7,-45.83,3.81,308.0,2.7
2018-04-21 07:16:00,2174.9,10.5,-46.39,3.92,132.0,3.7
2018-04-21 07:31:00,2169.3,5.0,-46.8,3.74,88.0,2.4
2018-04-21 09:26:00,2110.2,22.0,-45.49,4.0,88.0,2.4
2018-04-21 09:46:00,2084.3,10.0,-46.04,4.13,132.0,2.4
2018-04-21 10:05:00,2097.6,33.9,-45.82,4.07,88.0,1.7
2018-04-21 10:26:00,2114.1,63.8,-45.91,3.79,330.0,2.7
2018-04-21 10:46:00,2100.7,31.5,-45.33,3.83,132.0,2.0
2018-04-21 11:05:00,2075.1,10.9,-45.61,4.25,88.0,2.7
2018-04-21 11:25:00,2098.7,27.5,-45.01,4.1,88.0,2.0
2018-04-21 11:46:00,2166.5,77.4,-44.98,4.12,242.0,3.1
2018-04-21 12:06:00,2190.7,104.6,-44.88,4.01,110.0,2.4
2018-04-21 12:26:00,2101.1,6.0,-45.94,4.05,132.0,2.4
2018-04-21 12:45:00,2099.7,8.5,-45.88,3.93,132.0,2.7
2018-04-21 13:06:00,2092.0,12.8,-45.53,3.66,132.0,2.0
2018-04-21 13:26:00,2091.8,19.6,-45.23,4.0,88.0,2.0
2018-04-21 13:46:00,2093.0,38.6,-44.87,4.19,88.0,2.0
2018-04-21 14:05:00,2084.3,19.6,-44.9,4.0,88.0,2.0
2018-04-21 14:25:00,2073.8,2.6,-45.33,3.93,132.0,1.0
2018-04-21 14:46:00,2098.6,14.4,-45.07,3.55,88.0,3.7
2018-04-21 15:05:00,2165.6,44.2,-44.57,4.24,88.0,2.4
2018-04-21 15:25:00,2124.3,16.7,-45.43,3.75,132.0,3.1
2018-04-21 15:46:00,2139.2,28.0,-44.82,3.94,88.0,2.0
2018-04-21 16:05:00,2169.8,40.5,-44.81,4.17,88.0,2.0
2018-04-21 16:25:00,2197.4,37.9,-44.91,4.0,88.0,3.1
2018-04-21 16:46:00,2208.8,19.8,-45.0,3.77,132.0,2.0
2018-04-21 17:05:00,2190.0,8.6,-45.76,3.89,88.0,2.7
2018-04-21 17:25:00,2195.4,43.4,-45.32,3.53,132.0,2.0
2018-04-21 17:46:00,2190.6,28.6,-45.24,3.81,44.0,3.4
2018-04-21 18:05:00,2185.7,23.6,-45.48,3.97,44.0,2.7
2018-04-21 18:25:00,2115.1,5.6,-44.47,3.83,88.0,2.7
2018-04-21 18:45:00,2129.4,3.5,-44.99,3.99,110.0,2.4
2018-04-21 19:01:00,2123.9,2.4,-45.21,4.34,88.0,3.4
2018-04-21 20:57:00,2164.9,10.2,-44.33,3.9,308.0,0.0
2018-04-21 21:16:00,2145.2,14.4,-44.98,4.0,176.0,0.7
2018-04-21 21:36:00,2145.5,16.0,-44.37,4.03,176.0,0.7
2018-04-21 21:56:00,2169.9,51.2,-44.65,3.95,176.0,1.0
2018-04-21 22:16:00,2151.0,13.8,-44.19,4.17,88.0,1.7
2018-04-21 22:36:00,2210.0,29.6,-44.3,3.83,132.0,1.4
2018-04-21 22:56:00,2286.7,42.4,-44.39,3.22,88.0,0.7
2018-04-21 23:16:00,2211.5,121.0,-44.33,3.85,220.0,4.8
2018-04-21 23:36:00,2023.6,11.7,-44.6,3.92,308.0,2.7
2018-04-21 23:56:00,2024.7,6.5,-45.16,4.17,308.0,3.4
2018-04-22 00:17:00,2020.8,5.8,-44.97,4.4,308.0,1.4
2018-04-22 00:37:00,2026.9,43.4,-44.84,4.3,88.0,3.4
2018-04-22 00:56:00,2016.5,3.5,-44.85,4.26,88.0,2.0
2018-04-22 01:17:00,2048.6,18.5,-44.88,4.05,88.0,1.4
2018-04-22 01:37:00,2069.8,5.5,-44.44,4.3,132.0,3.7
2018-04-22 01:57:00,2071.5,2.8,-45.13,4.32,110.0,1.7
2018-04-22 02:16:00,2092.4,14.0,-44.36,4.24,88.0,3.1
2018-04-22 02:36:00,2156.4,40.9,-45.42,4.27,88.0,1.4
2018-04-22 02:57:00,2305.6,33.4,-45.96,3.73,88.0,2.7
2018-04-22 03:17:00,2405.4,22.0,-46.01,3.39,88.0,1.4
2018-04-22 03:36:00,2365.1,67.0,-45.34,3.7,88.0,2.0
2018-04-22 03:56:00,2367.8,54.7,-44.76,3.58,132.0,0.7
2018-04-22 04:16:00,2392.0,48.1,-44.92,3.56,308.0,0.3
2018-04-22 04:37:00,2408.7,12.3,-45.02,3.85,132.0,2.7
2018-04-22 04:56:00,2360.9,18.5,-45.3,3.54,110.0,2.0
2018-04-22 05:17:00,2388.1,20.2,-45.56,3.35,330.0,1.0
2018-04-22 05:37:00,2458.2,15.1,-45.53,3.55,132.0,0.7
2018-04-22 05:57:00,2514.2,62.8,-45.38,3.44,88.0,1.7
2018-04-22 06:17:00,2452.9,58.8,-44.99,3.52,132.0,1.7
2018-04-22 06:37:00,2368.0,15.1,-45.53,3.67,110.0,1.0
2018-04-22 06:57:00,2262.0,44.3,-45.89,3.53,264.0,1.0
2018-04-22 07:17:00,2138.6,16.6,-45.15,3.61,176.0,2.7
2018-04-22 07:32:00,2131.2,18.0,-45.36,4.35,264.0,2.4
2018-04-22 09:27:00,2078.3,10.7,-45.09,4.15,176.0,2.0
2018-04-22 09:46:00,2067.8,3.2,-45.72,4.03,220.0,4.4
2018-04-22 10:06:00,2064.0,6.5,-45.4,3.94,308.0,2.4
2018-04-22 10:27:00,2055.4,4.8,-45.42,3.75,220.0,3.1
2018-04-22 10:47:00,2036.1,5.9,-45.16,4.29,176.0,3.4
2018-04-22 11:07:00,2032.0,9.8,-45.37,4.1,264.0,1.4
2018-04-22 11:27:00,2024.2,3.9,-45.3,4.2,176.0,3.1
2018-04-22 11:47:00,1998.3,8.8,-45.21,4.2,264.0,4.4
2018-04-22 12:07:00,2002.9,7.4,-45.11,4.04,132.0,3.7
2018-04-22 12:27:00,1988.1,4.8,-45.57,4.17,220.0,3.4
2018-04-22 12:46:00,1983.1,7.6,-45.71,4.36,264.0,2.4
2018-04-22 13:06:00,1977.1,4.4,-45.82,4.54,308.0,1.4
2018-04-22 13:27:00,1980.8,3.3,-45.89,4.06,132.0,2.4
2018-04-22 13:47:00,1986.1,5.8,-45.67,3.99,176.0,1.4
2018-04-22 14:07:00,1988.9,4.3,-45.94,4.11,220.0,5.1
2018-04-22 14:27:00,1988.4,4.4,-45.26,4.07,176.0,5.4
2018-04-22 14:46:00,1992.3,7.8,-45.86,4.18,264.0,1.7
2018-04-22 15:06:00,1994.1,9.2,-45.84,4.14,308.0,5.4
2018-04-22 15:26:00,2004.7,5.3,-45.73,4.25,264.0,2.7
2018-04-22 15:46:00,2006.9,6.0,-45.61,4.21,220.0,3.4
2018-04-22 16:06:00,2022.3,6.7,-45.91,4.19,220.0,1.7
2018-04-22 16:27:00,2027.5,3.8,-45.89,4.02,264.0,1.7
2018-04-22 16:47:00,2026.0,4.6,-46.11,4.07,44.0,2.7
2018-04-22 17:06:00,2054.9,15.1,-46.28,3.98,220.0,3.4
2018-04-22 17:27:00,2048.8,8.3,-46.27,4.21,264.0,3.7
2018-04-22 17:47:00,2042.0,5.4,-46.59,4.06,264.0,5.1
2018-04-22 18:07:00,2039.4,10.0,-46.1,4.06,264.0,2.7
2018-04-22 18:27:00,2011.5,8.4,-46.37,4.18,264.0,4.4
2018-04-22 18:46:00,2001.0,5.8,-46.37,3.93,308.0,4.4
2018-04-22 19:02:00,1999.2,6.0,-45.9,4.12,264.0,4.8
2018-04-22 20:58:00,1993.8,9.6,-46.44,4.52,308.0,4.8
2018-04-22 21:18:00,1995.9,4.4,-45.75,4.59,308.0,3.1
2018-04-22 21:38:00,1995.4,3.7,-46.06,4.41,308.0,3.4
2018-04-22 21:58:00,1990.9,2.3,-46.27,4.11,220.0,3.7
2018-04-22 22:17:00,1996.6,4.0,-46.42,4.31,264.0,2.7
2018-04-22 22:38:00,1996.9,3.1,-46.33,4.48,286.0,5.1
2018-04-22 22:58:00,1994.5,2.6,-46.3,4.11,264.0,5.1
2018-04-22 23:17:00,1997.9,2.6,-46.02,4.18,0.0,5.4
2018-04-22 23:37:00,2003.7,3.8,-46.39,4.03,220.0,4.8
2018-04-22 23:57:00,1997.9,3.2,-46.13,4.18,286.0,4.4
2018-04-23 00:17:00,2000.7,5.3,-46.72,4.05,308.0,5.4
2018-04-23 00:37:00,2005.4,4.9,-46.85,4.25,264.0,4.4
2018-04-23 00:58:00,2003.5,5.2,-46.61,4.37,308.0,3.7
2018-04-23 01:18:00,2010.5,7.2,-46.13,3.99,308.0,2.0
2018-04-23 01:37:00,2023.0,3.6,-46.17,4.2,264.0,1.7
2018-04-23 01:57:00,2022.1,3.4,-46.54,4.08,308.0,1.7
2018-04-23 02:18:00,2037.2,16.2,-46.69,3.99,286.0,1.7
2018-04-23 02:38:00,2039.3,16.7,-46.51,4.02,286.0,2.7
2018-04-23 02:58:00,2019.2,3.7,-46.78,3.83,264.0,2.0
2018-04-23 03:17:00,2017.6,4.5,-46.86,3.95,308.0,2.4
2018-04-23 03:37:00,2018.8,3.3,-46.4,4.17,242.0,2.4
2018-04-23 03:57:00,2030.8,4.7,-46.95,3.96,286.0,1.4
2018-04-23 04:17:00,2028.5,3.3,-46.84,4.27,264.0,2.4
2018-04-23 04:37:00,2028.2,4.0,-46.47,4.14,176.0,2.4
2018-04-23 04:57:00,2029.2,3.4,-46.53,4.01,264.0,0.7
2018-04-23 05:18:00,2025.6,3.2,-46.43,4.05,264.0,2.0
2018-04-23 05:38:00,2026.2,4.1,-46.47,3.86,308.0,1.4
2018-04-23 05:58:00,2036.4,3.7,-46.64,3.85,176.0,1.7
2018-04-23 06:18:00,2030.9,3.3,-46.8,4.26,264.0,2.0
2018-04-23 06:37:00,2038.6,6.7,-46.73,4.22,264.0,0.3
2018-04-23 06:57:00,2057.1,4.8,-46.63,4.05,308.0,1.7
2018-04-23 07:17:00,2050.5,3.6,-46.32,3.77,176.0,2.0
2018-04-23 07:33:00,2045.9,3.7,-46.88,4.21,286.0,1.7
2018-04-23 09:27:00,1993.6,5.2,-46.78,3.98,154.0,2.0
2018-04-23 09:47:00,1990.4,3.0,-46.99,3.8,264.0,4.1
2018-04-23 10:08:00,1984.6,5.0,-47.14,3.95,264.0,3.1
2018-04-23 10:28:00,1981.6,2.7,-47.3,4.2,286.0,3.4
2018-04-23 10:47:00,1983.2,5.2,-46.78,4.19,220.0,2.4
2018-04-23 11:07:00,1989.2,4.1,-47.13,4.13,264.0,5.4
2018-04-23 11:28:00,1989.1,5.1,-46.64,4.19,198.0,2.4
2018-04-23 11:48:00,1985.3,3.4,-47.26,4.04,264.0,5.8
2018-04-23 12:08:00,1981.6,4.2,-46.75,4.0,176.0,4.8
2018-04-23 12:27:00,1979.0,4.1,-47.42,4.29,0.0,2.7
2018-04-23 12:47:00,1974.6,3.2,-46.97,4.22,308.0,3.1
2018-04-23 13:06:00,1969.1,3.2,-46.8,4.0,176.0,4.4
2018-04-23 18:22:00,1991.7,4.4,-46.81,4.42,308.0,3.7
2018-04-23 18:41:00,1992.6,6.3,-47.45,4.5,220.0,4.4
2018-04-23 19:02:00,1995.8,5.6,-47.33,4.15,308.0,2.0
2018-04-23 19:21:00,1991.1,3.5,-47.46,3.85,220.0,2.7
2018-04-23 19:42:00,1996.2,2.8,-47.28,3.92,176.0,3.4
2018-04-23 19:57:00,1997.7,4.8,-47.21,4.15,264.0,3.7
2018-04-23 21:52:00,1991.2,3.3,-47.48,4.47,264.0,3.1
2018-04-23 22:12:00,1996.5,3.6,-47.27,4.06,308.0,3.7
2018-04-23 22:31:00,1997.6,2.2,-47.15,4.23,264.0,2.4
2018-04-23 22:51:00,1993.5,3.5,-47.25,4.28,154.0,1.7
2018-04-23 23:11:00,1986.0,3.5,-47.34,3.91,220.0,4.1
2018-04-23 23:31:00,1989.2,3.1,-46.77,4.03,264.0,4.4
2018-04-23 23:51:00,1991.3,3.4,-47.0,3.93,220.0,2.4
2018-04-24 00:11:00,2000.4,3.3,-46.88,3.88,220.0,4.4
2018-04-24 00:31:00,1992.7,8.0,-47.55,3.95,220.0,4.1
2018-04-24 00:51:00,1988.4,3.6,-46.9,4.18,154.0,4.8
2018-04-24 01:12:00,1992.3,3.4,-47.11,3.98,220.0,3.1
2018-04-24 01:32:00,1995.4,3.9,-46.85,4.19,220.0,3.1
2018-04-24 01:51:00,1998.4,3.0,-46.98,3.78,220.0,1.4
2018-04-24 02:11:00,1999.6,3.3,-47.0,4.17,264.0,2.4
2018-04-24 02:32:00,2007.1,4.7,-46.94,4.19,220.0,2.7
2018-04-24 02:52:00,2009.1,5.1,-47.21,3.88,220.0,2.4
2018-04-24 03:12:00,2009.6,5.9,-46.79,4.18,220.0,1.0
2018-04-24 03:32:00,2007.7,3.4,-46.8,3.98,0.0,0.7
2018-04-24 03:51:00,2005.8,3.5,-47.08,3.95,264.0,1.7
2018-04-24 04:12:00,2008.3,4.2,-46.97,4.12,264.0,2.0
2018-04-24 04:31:00,2012.6,3.6,-46.68,4.02,264.0,4.1
2018-04-24 04:51:00,2022.3,5.6,-46.74,4.27,242.0,1.7
2018-04-24 05:11:00,2026.2,6.1,-46.94,4.12,264.0,2.0
2018-04-24 05:32:00,2018.2,5.6,-47.12,3.95,264.0,3.1
2018-04-24 05:51:00,2006.9,2.9,-47.44,4.04,0.0,2.4
2018-04-24 06:12:00,2011.8,4.1,-47.16,3.91,308.0,2.0
2018-04-24 06:32:00,2015.0,5.3,-46.67,3.94,264.0,3.1
2018-04-24 06:52:00,2022.7,4.2,-46.86,4.06,220.0,3.1
2018-04-24 07:12:00,2019.7,7.2,-46.89,4.22,308.0,2.7
2018-04-24 07:31:00,2013.9,6.4,-47.22,4.08,132.0,2.4
2018-04-24 07:51:00,1998.4,6.7,-47.16,4.35,176.0,2.7
2018-04-24 08:12:00,1992.9,4.2,-47.23,4.07,308.0,2.0
2018-04-24 08:27:00,1982.8,5.4,-47.25,3.76,264.0,3.7
2018-04-24 10:22:00,1974.9,3.9,-47.39,4.0,264.0,1.4
2018-04-24 10:41:00,1972.4,2.9,-47.01,4.05,176.0,1.0
2018-04-24 11:02:00,1971.7,7.8,-47.09,4.5,286.0,2.4
2018-04-24 11:22:00,1972.9,5.8,-47.0,4.1,264.0,1.7
2018-04-24 11:42:00,1975.9,5.1,-47.53,4.02,220.0,4.8
2018-04-24 12:02:00,1981.2,5.9,-47.05,3.93,220.0,2.4
2018-04-24 12:22:00,1985.7,5.8,-46.78,4.07,264.0,2.7
2018-04-24 12:41:00,1989.2,6.2,-47.23,4.01,132.0,2.0
2018-04-24 13:02:00,1995.4,8.2,-47.15,4.05,132.0,4.4
2018-04-24 13:21:00,1983.5,4.4,-46.79,4.1,264.0,2.7
2018-04-24 17:18:00,1959.4,3.7,-47.12,3.97,176.0,4.4
2018-04-24 17:39:00,1957.2,4.3,-47.0,4.23,176.0,8.2
2018-04-24 17:59:00,1952.9,4.1,-46.67,4.03,176.0,2.4
2018-04-24 18:19:00,1951.6,4.1,-46.27,4.19,220.0,3.1
2018-04-24 18:39:00,1953.4,4.1,-46.42,4.46,176.0,3.1
2018-04-24 18:54:00,1953.7,5.1,-46.51,4.45,264.0,4.8
2018-04-24 20:49:00,1948.7,2.2,-46.43,4.07,308.0,4.8
2018-04-24 21:09:00,1952.6,3.6,-46.62,3.93,220.0,5.1
2018-04-24 21:28:00,1953.9,3.6,-46.08,4.3,308.0,4.8
2018-04-24 21:48:00,1955.1,3.2,-46.16,4.23,264.0,5.8
2018-04-24 22:08:00,1954.0,3.2,-46.35,4.2,220.0,4.8
2018-04-24 22:28:00,1951.4,2.8,-46.9,4.41,286.0,3.4
2018-04-24 22:49:00,1953.1,4.3,-46.35,4.18,264.0,3.4
2018-04-24 23:09:00,1959.3,2.9,-46.29,4.32,264.0,1.7
2018-04-24 23:29:00,1970.1,5.4,-46.64,4.39,308.0,5.1
2018-04-24 23:49:00,1961.0,4.2,-46.49,4.11,264.0,4.4
2018-04-25 00:09:00,1960.8,4.2,-46.59,4.11,308.0,5.8
2018-04-25 00:29:00,1966.9,3.2,-46.32,4.07,220.0,4.4
2018-04-25 00:49:00,1973.4,3.3,-46.8,3.98,308.0,3.7
2018-04-25 01:09:00,1979.0,4.0,-46.79,3.99,264.0,3.1
2018-04-25 01:28:00,1981.0,4.5,-47.13,3.9,308.0,3.1
2018-04-25 01:49:00,1984.3,4.1,-46.79,4.09,220.0,2.7
2018-04-25 02:09:00,1982.7,4.1,-46.79,4.12,264.0,3.7
2018-04-25 02:29:00,1999.6,8.2,-46.94,4.19,286.0,2.4
2018-04-25 02:49:00,2016.5,2.3,-46.5,3.69,264.0,2.4
2018-04-25 03:08:00,2008.9,4.9,-46.82,3.93,220.0,2.7
2018-04-25 03:29:00,2012.3,3.6,-46.69,3.9,286.0,1.7
2018-04-25 03:48:00,2019.6,3.0,-46.84,3.88,308.0,2.7
2018-04-25 04:08:00,2024.7,4.5,-47.04,4.12,264.0,1.7
2018-04-25 04:28:00,2048.5,9.2,-46.99,3.89,308.0,2.4
2018-04-25 04:48:00,2049.9,4.5,-47.28,4.38,220.0,1.7
2018-04-25 05:09:00,2026.4,6.4,-46.83,3.98,264.0,1.7
2018-04-25 05:29:00,2028.5,4.6,-47.25,3.86,308.0,0.3
2018-04-25 05:49:00,2036.3,4.1,-47.67,3.87,286.0,1.4
2018-04-25 06:09:00,2038.1,3.6,-47.07,3.81,308.0,1.4
2018-04-25 06:29:00,2025.5,9.4,-46.91,4.09,264.0,2.4
2018-04-25 06:48:00,2025.8,7.3,-47.36,3.91,264.0,2.4
2018-04-25 07:08:00,2028.7,6.7,-47.52,4.04,264.0,2.7
2018-04-25 07:24:00,2019.7,6.5,-46.98,4.06,308.0,2.4
2018-04-25 09:18:00,1971.8,3.0,-47.42,4.43,308.0,5.1
2018-04-25 09:39:00,1973.8,4.7,-47.27,4.18,264.0,3.4
2018-04-25 09:58:00,1974.6,3.7,-47.26,3.78,264.0,3.1
2018-04-25 10:18:00,1967.3,3.8,-47.58,4.08,176.0,3.4
2018-04-25 11:26:00,1980.2,5.6,-47.36,4.37,220.0,2.0
2018-04-25 11:46:00,1968.1,2.6,-47.47,4.11,286.0,4.1
2018-04-25 12:05:00,1966.1,3.5,-47.77,4.08,264.0,5.8
2018-04-25 12:25:00,1970.0,3.5,-47.54,3.97,308.0,2.7
2018-04-25 12:45:00,1967.7,4.1,-47.64,4.32,264.0,2.7
2018-04-25 13:04:00,1968.8,3.5,-48.15,3.95,220.0,1.7
2018-04-25 15:05:00,1964.5,2.7,-47.8,4.17,220.0,5.4
2018-04-25 15:26:00,1966.2,3.3,-47.75,4.23,220.0,2.7
2018-04-25 15:46:00,1965.7,3.3,-48.37,4.31,220.0,7.1
2018-04-25 16:06:00,1963.3,2.3,-47.6,4.46,220.0,4.8
2018-04-25 16:26:00,1965.3,3.6,-48.38,3.98,308.0,3.7
2018-04-25 16:45:00,1964.8,3.4,-47.92,4.34,198.0,3.7
2018-04-25 17:05:00,1970.8,3.5,-47.69,4.33,308.0,2.4
2018-04-25 17:25:00,1975.7,3.2,-47.46,4.35,264.0,5.4
2018-04-25 17:45:00,1976.5,2.7,-48.14,4.06,286.0,4.1
2018-04-25 18:05:00,1987.8,5.0,-47.84,4.43,176.0,2.0
2018-04-25 18:26:00,1985.3,9.8,-47.92,4.09,308.0,4.4
2018-04-25 18:46:00,1969.8,3.1,-47.76,4.03,220.0,6.5
2018-04-25 19:06:00,1972.3,4.6,-47.93,4.21,264.0,5.1
2018-04-25 19:25:00,1970.5,3.6,-47.65,4.39,264.0,6.5
2018-04-25 19:45:00,1973.0,7.5,-47.54,4.03,308.0,3.4
2018-04-25 20:06:00,1980.5,3.6,-47.89,3.96,308.0,4.8
2018-04-25 20:25:00,1982.5,7.4,-47.99,4.04,264.0,6.1
2018-04-25 20:45:00,1980.1,6.3,-47.74,4.04,264.0,3.4
2018-04-25 21:05:00,1985.4,5.6,-47.83,3.73,264.0,2.4
2018-04-25 21:25:00,1988.2,4.2,-47.86,3.95,220.0,2.4
2018-04-25 21:46:00,1985.6,3.7,-47.73,3.97,264.0,2.4
2018-04-25 22:06:00,1985.8,3.4,-47.71,3.9,264.0,2.0
2018-04-25 22:26:00,1989.2,3.9,-47.74,4.21,308.0,1.4
2018-04-25 22:45:00,1997.9,3.3,-47.96,4.38,264.0,2.4
2018-04-25 23:05:00,1993.8,4.2,-47.91,4.05,264.0,2.7
2018-04-25 23:25:00,1991.8,2.6,-47.75,3.94,308.0,3.4
2018-04-25 23:46:00,1997.9,4.2,-47.18,4.32,264.0,3.1
2018-04-26 00:06:00,2006.3,3.5,-47.94,3.97,0.0,1.7
2018-04-26 00:25:00,2007.3,4.0,-47.77,3.68,220.0,3.1
2018-04-26 00:46:00,1998.4,3.5,-47.69,4.01,308.0,2.0
2018-04-26 01:05:00,1999.8,4.8,-47.93,3.99,154.0,2.4
2018-04-26 01:25:00,2009.4,4.5,-47.71,3.79,0.0,1.0
2018-04-26 01:41:00,2014.1,2.9,-47.55,3.96,176.0,2.7
2018-04-26 03:35:00,2006.7,3.9,-47.8,3.91,264.0,4.1
2018-04-26 03:56:00,2013.5,3.6,-47.72,3.86,220.0,1.4
2018-04-26 04:15:00,2015.3,4.0,-47.59,4.2,264.0,2.7
2018-04-26 04:36:00,2018.0,4.4,-48.0,4.2,264.0,1.4
2018-04-26 04:56:00,2016.4,3.9,-48.05,3.95,220.0,3.4
2018-04-26 05:16:00,2016.9,2.2,-47.93,4.12,220.0,2.7
2018-04-26 05:35:00,2018.8,5.2,-47.84,4.01,308.0,1.4
2018-04-26 05:55:00,2017.0,1.9,-47.74,3.95,220.0,2.7
2018-04-26 06:16:00,2019.8,4.9,-47.46,3.95,176.0,2.0
2018-04-26 06:35:00,2018.3,3.5,-47.48,3.61,264.0,2.7
2018-04-26 06:55:00,2015.8,4.3,-47.73,4.14,220.0,3.4
2018-04-26 07:15:00,2006.5,5.2,-47.08,3.97,308.0,2.4
2018-04-26 07:35:00,2002.8,5.6,-47.46,3.92,264.0,3.4
2018-04-26 07:55:00,1997.9,3.2,-47.36,4.41,308.0,3.4
2018-04-26 08:15:00,1991.4,5.5,-47.66,4.27,220.0,3.4
2018-04-26 08:35:00,1983.7,6.3,-47.58,4.09,308.0,4.1
2018-04-26 08:56:00,1986.5,3.9,-47.73,4.05,220.0,4.8
2018-04-26 09:16:00,1984.4,3.8,-47.48,4.05,264.0,2.4
2018-04-26 09:35:00,1984.2,4.4,-47.78,4.08,220.0,3.4
2018-04-26 09:55:00,1976.8,4.4,-47.93,4.11,286.0,3.7
2018-04-26 10:15:00,1977.0,4.6,-47.79,4.3,308.0,2.4
2018-04-26 10:36:00,1977.0,4.6,-48.17,4.03,286.0,2.4
2018-04-26 10:56:00,1975.5,3.4,-47.82,4.28,264.0,4.8
2018-04-26 11:15:00,1971.9,3.0,-47.74,4.04,264.0,2.7
2018-04-26 11:35:00,1973.5,2.7,-47.93,4.11,176.0,3.1
2018-04-26 11:55:00,1971.7,4.7,-48.03,4.1,308.0,4.1
2018-04-26 12:15:00,1972.1,2.6,-47.26,4.23,88.0,2.7
2018-04-26 12:35:00,1974.0,4.9,-47.64,3.91,220.0,3.7
2018-04-26 12:56:00,1975.2,6.0,-47.32,4.09,264.0,1.7
2018-04-26 13:11:00,1977.2,4.4,-47.45,3.89,308.0,0.7
2018-04-26 15:07:00,1962.3,4.7,-47.56,4.02,242.0,5.4
2018-04-26 15:27:00,1964.0,2.6,-47.79,3.88,264.0,2.7
2018-04-26 15:47:00,1961.8,3.3,-48.18,3.98,308.0,2.7
2018-04-26 16:06:00,1966.8,6.4,-48.23,4.14,220.0,1.7
2018-04-26 16:27:00,1964.5,5.7,-47.94,4.15,220.0,3.1
2018-04-26 16:46:00,1962.7,3.6,-47.48,4.37,308.0,4.1
2018-04-26 17:07:00,1965.0,4.6,-48.36,4.17,220.0,5.1
2018-04-26 17:27:00,1972.3,4.1,-48.22,4.04,220.0,1.4
2018-04-26 17:46:00,1977.4,3.4,-48.09,4.21,132.0,5.8
2018-04-26 18:06:00,1977.6,4.3,-47.98,4.51,176.0,1.0
2018-04-26 18:26:00,1980.7,3.6,-47.62,4.03,264.0,4.1
2018-04-26 18:47:00,1982.1,4.0,-47.7,4.13,176.0,3.7
2018-04-26 19:07:00,1976.7,2.9,-47.93,4.01,88.0,2.0
2018-04-26 19:27:00,1976.3,3.8,-47.4,4.01,220.0,4.4
2018-04-26 19:47:00,1981.1,4.1,-47.47,4.06,264.0,3.1
2018-04-26 20:06:00,1983.8,3.4,-47.5,4.18,220.0,4.4
2018-04-26 20:27:00,1990.9,5.3,-47.69,3.75,308.0,1.4
2018-04-26 20:47:00,1990.1,5.5,-47.34,4.15,264.0,2.0
2018-04-26 21:07:00,2003.3,3.4,-46.98,3.98,264.0,0.7
2018-04-26 21:27:00,2001.9,5.6,-47.33,4.19,264.0,2.0
2018-04-26 21:47:00,2007.3,5.0,-47.03,4.12,264.0,1.4
2018-04-26 22:07:00,2001.8,4.4,-47.09,4.1,132.0,2.0
2018-04-26 22:26:00,2000.9,4.1,-47.04,4.14,264.0,1.4
2018-04-26 22:47:00,2006.6,5.1,-46.93,4.29,308.0,1.4
2018-04-26 23:07:00,2007.0,5.3,-47.26,3.87,220.0,1.7
2018-04-26 23:26:00,2007.2,3.9,-46.92,4.27,220.0,1.7
2018-04-26 23:46:00,2020.6,5.5,-47.09,4.12,220.0,1.0
2018-04-27 00:06:00,2043.0,11.0,-46.96,4.02,0.0,1.4
2018-04-27 00:27:00,2052.2,10.6,-47.13,3.87,220.0,1.7
2018-04-27 00:47:00,2046.3,13.3,-46.97,3.94,264.0,0.7
2018-04-27 01:06:00,2062.3,20.4,-46.89,3.75,176.0,2.7
2018-04-27 01:26:00,2103.9,19.9,-46.78,3.87,44.0,0.3
2018-04-27 01:42:00,2061.0,10.8,-47.64,3.96,88.0,0.3
2018-04-27 03:36:00,2102.5,10.6,-47.33,3.91,198.0,1.4
2018-04-27 03:56:00,2109.9,15.7,-47.16,3.96,132.0,0.7
2018-04-27 04:16:00,2118.7,19.8,-46.97,4.07,88.0,1.4
2018-04-27 04:36:00,2093.9,8.4,-47.08,3.9,198.0,0.7
2018-04-27 04:57:00,2158.2,68.1,-47.23,3.68,132.0,2.0
2018-04-27 05:17:00,2130.8,9.7,-47.78,3.75,176.0,1.7
2018-04-27 05:36:00,2114.4,17.6,-47.75,3.71,176.0,2.0
2018-04-27 05:56:00,2061.8,15.8,-47.52,4.16,132.0,2.7
2018-04-27 06:16:00,2048.3,13.6,-47.34,4.01,132.0,0.3
2018-04-27 06:37:00,2066.7,18.0,-47.46,4.04,88.0,1.4
2018-04-27 06:57:00,2034.8,31.2,-47.37,3.87,88.0,1.7
2018-04-27 07:16:00,1990.0,9.3,-47.1,3.93,44.0,2.7
2018-04-27 07:36:00,1977.1,4.6,-47.09,4.23,132.0,3.1
2018-04-27 07:56:00,1995.5,6.3,-46.95,4.28,176.0,2.0
2018-04-27 08:17:00,2010.9,14.8,-47.47,3.96,286.0,3.1
2018-04-27 08:37:00,2008.5,10.9,-47.3,3.79,88.0,4.4
2018-04-27 08:56:00,2086.3,72.3,-46.86,3.74,132.0,1.4
2018-04-27 09:16:00,2097.1,23.5,-47.13,3.63,264.0,2.4
2018-04-27 09:37:00,2048.2,17.3,-47.28,3.88,132.0,3.7
2018-04-27 09:57:00,2024.2,39.0,-47.13,3.87,44.0,4.1
2018-04-27 10:16:00,2019.2,16.7,-47.08,3.96,88.0,5.1
2018-04-27 10:37:00,2045.7,27.4,-47.16,3.87,44.0,4.1
2018-04-27 10:57:00,2016.3,5.1,-47.15,4.11,132.0,2.7
2018-04-27 11:16:00,2020.8,6.4,-47.26,4.17,88.0,3.4
2018-04-27 11:37:00,2036.6,19.9,-47.1,3.89,88.0,3.7
2018-04-27 11:56:00,2039.2,12.4,-47.57,4.01,132.0,2.7
2018-04-27 12:17:00,2033.5,8.7,-47.35,3.9,132.0,3.1
2018-04-27 12:37:00,2033.3,4.7,-47.19,3.71,132.0,2.4
2018-04-27 12:56:00,2052.2,27.1,-47.05,4.0,88.0,2.7
2018-04-27 13:12:00,2162.8,76.9,-46.35,3.49,220.0,2.0
2018-04-27 18:56:00,2081.9,19.9,-48.37,4.01,176.0,2.0
2018-04-27 19:16:00,2128.3,37.3,-47.83,3.85,132.0,0.3
2018-04-27 19:36:00,2097.8,55.9,-47.47,3.95,88.0,1.0
2018-04-27 19:55:00,2145.7,54.7,-47.34,3.84,132.0,0.7
2018-04-27 20:15:00,2115.4,85.7,-46.81,3.63,154.0,0.7
2018-04-27 20:31:00,2183.0,71.4,-46.56,3.51,132.0,1.0
2018-04-27 22:25:00,2028.5,11.7,-47.22,4.37,110.0,2.0
2018-04-27 22:45:00,2022.8,6.0,-47.05,3.71,88.0,1.0
2018-04-27 23:05:00,2013.3,5.1,-47.29,4.18,88.0,2.4
2018-04-27 23:25:00,2011.7,2.8,-47.63,4.03,88.0,1.7
2018-04-27 23:45:00,2002.4,5.0,-47.1,4.25,132.0,1.4
2018-04-28 00:06:00,2000.1,3.5,-46.7,4.09,132.0,2.0
2018-04-28 00:26:00,2002.3,4.5,-46.63,4.35,132.0,1.7
2018-04-28 00:46:00,2011.8,8.7,-46.31,3.93,88.0,0.7
2018-04-28 01:05:00,2008.6,6.4,-46.61,3.98,88.0,1.4
2018-04-28 01:26:00,2024.7,9.1,-46.58,4.29,nan,nan
2018-04-28 01:46:00,2048.9,22.6,-46.11,3.98,nan,nan
2018-04-28 02:06:00,2130.1,11.7,-46.21,4.04,nan,nan
2018-04-28 02:26:00,2112.6,11.2,-46.35,3.94,176.0,1.0
2018-04-28 02:45:00,2098.3,9.9,-46.59,3.67,308.0,2.4
2018-04-28 03:05:00,2085.4,3.8,-47.07,3.96,308.0,2.7
2018-04-28 03:26:00,2077.3,1.8,-46.86,4.06,308.0,2.4
2018-04-28 03:45:00,2061.4,8.1,-46.93,4.03,308.0,2.0
2018-04-28 04:06:00,2057.9,13.4,-46.81,4.02,308.0,1.4
2018-04-28 04:26:00,2054.1,6.0,-46.66,4.08,264.0,2.4
2018-04-28 04:45:00,2043.5,3.3,-46.86,3.87,264.0,2.4
2018-04-28 05:05:00,2049.9,6.6,-46.75,3.99,308.0,1.4
2018-04-28 05:26:00,2032.9,7.1,-46.45,4.22,308.0,1.4
2018-04-28 05:46:00,2017.1,3.9,-46.57,3.99,308.0,2.4
2018-04-28 06:05:00,2013.1,4.9,-46.51,3.96,308.0,2.0
2018-04-28 06:25:00,2006.0,3.1,-46.76,4.09,308.0,2.4
2018-04-28 06:45:00,2000.1,4.6,-46.81,4.26,308.0,1.4
2018-04-28 07:05:00,2004.7,6.6,-46.62,4.16,286.0,1.0
2018-04-28 07:25:00,1996.0,4.5,-46.43,3.96,264.0,2.0
2018-04-28 07:46:00,1992.7,7.1,-46.89,4.18,0.0,3.1
2018-04-28 08:05:00,1989.0,3.1,-46.84,4.13,0.0,2.0
2018-04-28 08:25:00,2000.3,7.4,-46.47,4.36,264.0,1.4
2018-04-28 08:46:00,1997.3,4.4,-46.56,3.97,286.0,2.7
2018-04-28 09:01:00,1992.9,5.0,-47.16,4.32,308.0,1.7
2018-04-28 10:55:00,1978.5,3.9,-46.71,4.41,132.0,0.7
2018-04-28 11:16:00,1981.4,5.0,-46.89,4.08,264.0,1.7
2018-04-28 11:36:00,1982.8,5.9,-46.69,4.43,308.0,1.0
2018-04-28 11:55:00,1976.4,3.5,-47.06,4.16,330.0,1.0
2018-04-28 12:15:00,1982.4,7.5,-46.47,4.15,286.0,2.7
2018-04-28 12:35:00,1986.6,3.7,-46.69,4.22,264.0,1.4
2018-04-28 12:56:00,1995.7,9.1,-46.34,4.22,264.0,1.0
2018-04-28 13:15:00,1983.3,3.7,-46.64,4.18,308.0,1.7
2018-04-28 13:35:00,1984.8,6.4,-46.68,4.1,264.0,2.4
2018-04-28 13:56:00,1995.2,7.4,-46.54,3.95,0.0,2.0
2018-04-28 14:16:00,1991.1,4.8,-46.28,4.14,0.0,2.0
2018-04-28 14:36:00,1993.1,5.6,-46.47,3.95,264.0,1.0
2018-04-28 14:55:00,2023.2,13.4,-46.41,3.9,308.0,2.0
2018-04-28 15:15:00,1996.9,5.2,-46.24,4.03,308.0,1.0
2018-04-28 15:36:00,1988.1,4.2,-46.95,3.89,176.0,1.7
2018-04-28 15:56:00,1986.3,3.8,-46.26,4.15,308.0,1.7
2018-04-28 16:16:00,1987.3,4.5,-46.91,4.14,88.0,0.7
2018-04-28 16:35:00,1985.8,4.6,-46.62,4.35,0.0,1.4
2018-04-28 16:55:00,1985.2,3.3,-46.61,3.91,0.0,1.4
2018-04-28 17:16:00,1991.3,8.1,-46.6,3.91,286.0,1.4
2018-04-28 17:36:00,1988.9,5.4,-46.74,3.97,264.0,0.7
2018-04-28 17:56:00,1989.0,5.2,-46.44,4.05,176.0,2.0
2018-04-28 18:16:00,1987.7,4.8,-47.13,3.83,308.0,2.4
2018-04-28 18:35:00,1988.5,3.3,-46.29,3.84,308.0,1.4
2018-04-28 18:55:00,1991.1,3.2,-46.86,3.97,132.0,1.4
2018-04-28 19:16:00,1991.8,5.6,-46.6,3.96,264.0,2.4
2018-04-28 19:36:00,1982.4,2.6,-46.7,4.25,308.0,2.7
2018-04-28 19:56:00,1986.5,5.1,-46.77,3.86,264.0,2.0
2018-04-28 20:16:00,1989.1,7.2,-46.83,4.51,264.0,2.4
2018-04-28 20:31:00,1977.0,2.7,-47.09,3.92,308.0,1.4
2018-04-28 22:26:00,1985.8,2.0,-46.4,4.33,88.0,2.7
2018-04-28 22:47:00,1986.8,2.7,-46.43,3.97,0.0,2.0
2018-04-28 23:07:00,1992.7,2.5,-46.56,3.9,0.0,1.0
2018-04-28 23:26:00,1996.3,5.1,-46.35,4.51,0.0,1.4
2018-04-28 23:46:00,1990.1,4.6,-46.53,4.08,264.0,1.7
2018-04-29 00:07:00,1990.1,4.5,-46.55,4.32,308.0,1.0
2018-04-29 00:26:00,1991.4,7.0,-46.71,3.94,264.0,2.0
2018-04-29 00:47:00,1992.2,3.4,-46.8,4.2,132.0,1.4
2018-04-29 01:08:00,1989.0,1.6,-46.59,4.23,286.0,1.7
2018-04-29 01:27:00,1991.0,2.9,-46.56,4.17,0.0,1.7
2018-04-29 01:47:00,1992.6,3.3,-46.51,4.06,264.0,1.7
2018-04-29 02:06:00,1994.7,7.8,-46.56,4.08,0.0,2.4
2018-04-29 02:27:00,1995.4,5.3,-47.08,3.96,220.0,1.0
2018-04-29 02:47:00,1993.0,8.7,-46.78,4.39,88.0,1.7
2018-04-29 03:07:00,1979.5,5.4,-46.47,3.82,110.0,2.7
2018-04-29 03:27:00,1987.1,3.0,-46.39,4.1,0.0,1.0
2018-04-29 03:46:00,1989.7,4.4,-47.15,4.33,0.0,2.7
2018-04-29 04:06:00,1983.1,3.8,-46.88,3.99,0.0,2.7
2018-04-29 04:26:00,1982.9,4.8,-46.68,4.32,88.0,2.7
2018-04-29 04:46:00,1982.7,3.0,-46.77,4.17,264.0,1.7
2018-04-29 05:06:00,1991.8,4.3,-46.98,4.25,308.0,1.7
2018-04-29 05:26:00,1989.7,3.6,-46.85,3.99,0.0,2.4
2018-04-29 05:47:00,1991.6,4.1,-46.35,4.09,264.0,4.4
2018-04-29 06:07:00,1992.0,1.8,-46.69,3.91,88.0,1.7
2018-04-29 06:26:00,1994.5,3.0,-46.83,4.07,0.0,2.7
2018-04-29 06:47:00,1991.9,1.8,-47.05,4.25,88.0,1.7
2018-04-29 07:07:00,1996.2,2.7,-46.78,4.19,132.0,1.4
2018-04-29 07:27:00,1999.8,3.3,-46.62,4.22,0.0,2.0
2018-04-29 07:47:00,1993.1,3.0,-47.0,4.27,308.0,2.4
2018-04-29 08:06:00,1983.1,5.0,-46.91,4.17,330.0,1.7
2018-04-29 08:26:00,1983.5,2.5,-47.19,4.35,88.0,1.7
2018-04-29 08:47:00,1978.6,3.1,-46.76,3.92,308.0,4.1
2018-04-29 09:02:00,1978.2,3.4,-46.95,4.16,88.0,3.7
2018-04-29 10:56:00,1964.5,3.0,-46.88,4.1,0.0,3.4
2018-04-29 11:17:00,1965.8,4.1,-46.92,3.88,176.0,1.4
2018-04-29 11:37:00,1964.0,2.9,-47.12,4.15,0.0,3.7
2018-04-29 11:57:00,1961.9,4.0,-47.32,4.1,308.0,5.8
2018-04-29 12:17:00,1959.4,1.5,-46.6,4.05,308.0,3.1
2018-04-29 12:37:00,1957.3,1.8,-47.25,4.18,264.0,3.4
2018-04-29 12:57:00,1963.4,2.8,-46.98,4.27,132.0,3.7
2018-04-29 13:17:00,1961.7,2.8,-46.88,4.18,0.0,4.1
2018-04-29 13:37:00,1963.0,2.6,-47.0,4.1,220.0,2.0
2018-04-29 13:57:00,1961.4,3.7,-46.72,4.69,88.0,3.7
2018-04-29 14:16:00,1958.1,1.9,-47.01,3.99,286.0,5.1
2018-04-29 14:36:00,1968.5,4.1,-47.12,3.99,308.0,2.4
2018-04-29 14:57:00,1961.8,2.3,-47.34,4.32,330.0,3.7
2018-04-29 15:17:00,1962.9,2.6,-47.1,4.07,132.0,5.1
2018-04-29 15:37:00,1965.1,4.1,-47.27,4.19,0.0,3.4
2018-04-29 15:56:00,1964.5,2.6,-46.88,4.51,220.0,3.1
2018-04-29 16:16:00,1962.1,3.8,-46.94,4.52,132.0,5.1
2018-04-29 16:37:00,1958.9,3.7,-47.28,4.01,0.0,5.4
2018-04-29 16:57:00,1963.0,4.2,-47.22,4.28,88.0,1.7
2018-04-29 17:17:00,1965.8,2.7,-47.32,4.02,0.0,4.1
2018-04-29 17:36:00,1966.2,3.0,-47.2,4.18,0.0,3.7
2018-04-29 17:56:00,1965.5,3.1,-47.12,4.14,308.0,3.4
2018-04-29 18:16:00,1965.4,1.7,-47.38,4.19,286.0,5.8
2018-04-29 18:36:00,1962.9,1.9,-46.77,4.19,88.0,4.1
2018-04-29 18:57:00,1961.0,1.2,-47.21,4.25,264.0,3.7
2018-04-29 19:17:00,1961.4,2.1,-46.9,4.37,88.0,6.5
2018-04-29 19:36:00,1965.2,4.3,-47.05,4.36,88.0,4.1
2018-04-29 19:57:00,1966.3,2.7,-46.92,4.37,308.0,2.7
2018-04-29 20:17:00,1962.6,3.0,-47.21,3.75,264.0,2.7
2018-04-29 20:32:00,1958.5,1.1,-47.32,4.52,0.0,4.1
2018-04-29 22:28:00,1968.4,3.9,-47.31,4.1,330.0,4.8
2018-04-29 22:48:00,1967.5,3.9,-47.13,4.33,88.0,5.4
2018-04-29 23:07:00,1965.6,1.8,-47.02,4.44,0.0,5.4
2018-04-29 23:27:00,1961.2,2.4,-47.59,4.16,0.0,3.4
2018-04-29 23:47:00,1965.1,2.7,-47.05,4.43,308.0,4.8
2018-04-30 00:08:00,1963.3,2.1,-47.7,4.09,0.0,3.1
2018-04-30 00:28:00,1963.8,2.2,-47.32,4.24,308.0,3.4
2018-04-30 00:47:00,1962.0,3.4,-47.5,4.22,264.0,3.7
2018-04-30 01:08:00,1960.6,2.6,-47.17,4.29,308.0,1.7
2018-04-30 01:28:00,1965.1,2.7,-46.94,4.66,0.0,3.7
2018-04-30 01:47:00,1964.1,2.0,-47.31,4.31,308.0,1.4
2018-04-30 02:07:00,1965.4,3.8,-47.75,4.19,0.0,1.7
2018-04-30 02:27:00,1958.1,1.9,-47.07,4.31,330.0,5.4
2018-04-30 02:48:00,1956.9,1.4,-47.47,4.26,0.0,3.7
2018-04-30 03:08:00,1959.7,1.9,-46.69,4.22,330.0,2.7
2018-04-30 03:27:00,1958.9,2.0,-47.2,4.36,264.0,7.1
2018-04-30 03:47:00,1959.8,2.0,-47.18,4.21,264.0,3.7
2018-04-30 04:07:00,1960.5,2.2,-47.02,4.2,0.0,2.7
2018-04-30 04:27:00,1962.3,1.7,-47.37,4.34,264.0,1.7
2018-04-30 04:47:00,1963.6,2.2,-47.64,4.63,330.0,5.1
2018-04-30 05:07:00,1959.6,2.1,-47.18,4.47,0.0,2.7
2018-04-30 05:28:00,1964.3,2.7,-47.01,4.66,264.0,2.7
2018-04-30 05:48:00,1963.9,2.1,-47.19,4.6,88.0,3.1
2018-04-30 06:07:00,1965.3,2.3,-47.28,4.41,330.0,3.1
2018-04-30 06:27:00,1965.3,2.7,-47.48,4.62,132.0,2.7
2018-04-30 06:47:00,1965.2,1.6,-47.19,4.35,154.0,5.1
2018-04-30 07:08:00,1965.0,2.4,-46.69,4.49,264.0,3.1
2018-04-30 07:27:00,1966.0,2.3,-46.87,4.41,308.0,2.4
2018-04-30 07:48:00,1963.3,1.5,-46.55,4.51,198.0,3.1
2018-04-30 08:08:00,1964.6,2.9,-47.22,4.5,264.0,2.7
2018-04-30 08:27:00,1964.5,2.8,-47.63,4.63,308.0,1.7
2018-04-30 08:48:00,1963.7,2.2,-47.29,4.08,286.0,3.7
2018-04-30 09:03:00,1963.8,2.7,-46.66,4.36,308.0,1.7
2018-04-30 10:58:00,1956.9,1.6,-47.32,4.4,330.0,4.4
2018-04-30 11:17:00,1956.9,2.8,-46.96,4.71,308.0,3.7
2018-04-30 11:37:00,1957.2,2.2,-47.0,4.36,308.0,5.4
2018-04-30 11:58:00,1959.2,2.4,-46.9,4.48,264.0,2.7
2018-04-30 12:18:00,1957.8,2.7,-47.01,4.14,308.0,3.4
2018-04-30 12:36:00,1957.4,3.7,-47.19,4.49,308.0,6.5
2018-04-30 15:02:00,1964.6,1.7,-47.45,4.39,220.0,2.7
2018-04-30 15:23:00,1966.7,2.3,-47.64,4.46,308.0,3.4
2018-04-30 15:43:00,1967.2,4.2,-47.24,4.08,0.0,1.4
2018-04-30 16:02:00,1967.3,4.1,-47.61,4.22,0.0,3.4
2018-04-30 16:22:00,1971.1,2.7,-47.56,4.53,264.0,2.0
2018-04-30 16:38:00,1968.4,2.1,-47.79,4.05,0.0,3.7
2018-04-30 18:33:00,2006.3,9.6,-47.22,4.15,308.0,1.7
2018-04-30 18:52:00,2005.3,9.3,-47.64,4.05,308.0,2.7
2018-04-30 19:12:00,2007.3,6.6,-47.3,4.12,264.0,2.7
2018-04-30 19:33:00,2021.3,9.7,-47.21,4.21,308.0,3.7
2018-04-30 19:52:00,2017.1,8.1,-47.39,4.06,286.0,2.4
2018-04-30 20:13:00,2015.7,17.6,-47.37,4.46,264.0,1.4
2018-04-30 20:33:00,2031.2,7.1,-47.28,3.91,242.0,2.0
2018-04-30 20:53:00,2034.7,7.5,-47.62,4.2,308.0,1.7
2018-04-30 21:13:00,2049.2,16.9,-47.14,3.84,0.0,1.7
2018-04-30 21:32:00,2092.5,12.5,-47.18,3.86,308.0,1.4
2018-04-30 21:53:00,2138.7,10.3,-46.98,4.05,264.0,1.4
2018-04-30 22:13:00,2176.5,9.1,-46.59,4.18,220.0,2.4
2018-04-30 22:33:00,2174.5,3.7,-46.81,3.82,264.0,2.0
2018-04-30 22:53:00,2176.7,5.5,-47.15,3.85,264.0,2.4
2018-04-30 23:12:00,2168.5,16.5,-47.39,3.83,0.0,2.7
2018-04-30 23:32:00,2122.3,12.2,-47.19,4.05,264.0,1.7
2018-04-30 23:52:00,2092.0,11.9,-47.72,4.28,308.0,3.7
2018-05-01 00:12:00,2076.5,4.0,-47.92,4.16,264.0,2.4
2018-05-01 00:33:00,2094.7,18.5,-47.14,3.94,220.0,2.0
2018-05-01 00:53:00,2120.5,4.9,-47.35,3.98,220.0,1.7
2018-05-01 01:12:00,2119.6,4.3,-47.68,4.1,264.0,2.7
2018-05-01 01:32:00,2131.7,9.8,-47.62,4.13,264.0,3.1
2018-05-01 01:53:00,2144.2,6.6,-47.69,3.97,264.0,2.0
2018-05-01 02:13:00,2126.1,5.2,-47.55,4.47,286.0,2.4
2018-05-01 02:33:00,2120.9,4.3,-47.58,4.16,308.0,2.7
2018-05-01 02:52:00,2123.7,6.2,-47.66,3.96,308.0,2.4
2018-05-01 03:13:00,2123.0,5.5,-47.13,4.0,264.0,2.0
2018-05-01 03:33:00,2129.2,13.0,-47.34,4.26,0.0,1.0
2018-05-01 03:52:00,2143.7,14.9,-47.36,4.04,0.0,1.4
2018-05-01 04:12:00,2166.5,7.3,-47.74,4.09,264.0,1.7
2018-05-01 04:32:00,2140.1,11.5,-47.52,4.02,308.0,0.3
2018-05-01 04:52:00,2148.1,9.0,-47.49,3.87,220.0,0.7
2018-05-01 05:08:00,2149.2,5.0,-47.42,4.07,264.0,0.3
2018-05-01 07:03:00,2153.3,8.2,-47.31,3.84,132.0,1.7
2018-05-01 07:23:00,2173.6,3.7,-47.38,3.88,220.0,1.7
2018-05-01 07:42:00,2162.9,7.0,-47.58,3.73,308.0,1.0
2018-05-01 08:03:00,2121.2,11.5,-47.57,4.0,308.0,1.7
2018-05-01 08:23:00,2093.6,15.1,-47.27,4.11,198.0,2.4
2018-05-01 08:42:00,2056.5,4.3,-47.52,4.24,132.0,1.7
2018-05-01 09:02:00,2027.9,6.0,-47.58,4.29,176.0,2.4
2018-05-01 09:22:00,1998.0,14.9,-47.47,4.05,264.0,2.7
2018-05-01 09:42:00,1984.9,5.2,-47.31,4.34,176.0,2.0
2018-05-01 10:02:00,1989.0,4.3,-47.23,4.01,220.0,3.4
2018-05-01 10:25:00,1989.9,5.9,-47.11,4.38,308.0,3.1
2018-05-01 10:42:00,1989.1,5.7,-47.22,3.78,110.0,2.0
2018-05-01 11:02:00,1993.2,3.8,-47.26,3.81,242.0,1.0
2018-05-01 11:22:00,1993.7,4.8,-47.09,4.36,176.0,3.1
2018-05-01 11:42:00,1988.4,5.3,-47.62,4.11,220.0,4.1
2018-05-01 12:03:00,1989.7,4.1,-47.16,4.39,264.0,3.7
2018-05-01 12:19:00,1988.6,4.3,-47.35,3.49,264.0,2.7
2018-05-01 16:23:00,1976.3,2.2,-47.12,3.83,132.0,4.4
2018-05-01 16:43:00,1979.4,4.2,-46.82,3.99,176.0,2.0
2018-05-01 17:03:00,1977.3,6.0,-46.7,4.16,198.0,4.1
2018-05-01 17:22:00,1984.8,3.3,-47.57,4.19,132.0,2.7
2018-05-01 17:42:00,1981.6,4.6,-47.36,4.25,220.0,4.1
2018-05-01 17:58:00,1984.7,2.9,-47.04,4.11,220.0,2.0
2018-05-01 19:53:00,2004.9,5.9,-46.82,4.05,220.0,2.7
2018-05-01 20:12:00,2029.7,10.7,-46.88,4.12,286.0,3.4
2018-05-01 20:33:00,2037.7,4.9,-46.65,4.02,88.0,2.7
2018-05-01 20:53:00,2041.6,5.9,-46.73,4.03,220.0,1.7
2018-05-01 21:12:00,2041.0,16.8,-46.4,4.12,132.0,3.1
2018-05-01 21:32:00,2072.2,6.8,-46.99,3.87,176.0,2.0
2018-05-01 21:52:00,2071.6,7.8,-47.05,4.07,176.0,1.7
2018-05-01 22:12:00,2061.5,4.7,-47.08,4.08,176.0,2.4
2018-05-01 22:32:00,2049.1,7.8,-46.63,3.86,286.0,1.7
2018-05-01 22:53:00,2050.5,8.9,-46.78,4.18,132.0,3.1
2018-05-01 23:13:00,2049.2,5.9,-46.91,3.96,132.0,2.0
2018-05-01 23:33:00,2064.6,11.7,-46.81,3.78,132.0,3.1
2018-05-01 23:53:00,2064.2,10.1,-47.47,3.96,132.0,1.4
2018-05-02 00:13:00,2056.6,9.2,-46.96,3.93,176.0,3.7
2018-05-02 00:32:00,2067.9,16.3,-46.8,3.99,220.0,1.7
2018-05-02 00:53:00,2044.9,7.5,-46.65,4.16,220.0,3.1
2018-05-02 01:12:00,2029.6,8.2,-46.9,4.12,308.0,4.4
2018-05-02 01:32:00,2006.5,8.3,-46.81,4.02,132.0,3.4
2018-05-02 01:52:00,1994.0,5.2,-46.97,3.93,132.0,5.1
2018-05-02 02:12:00,1988.6,3.4,-46.55,3.98,264.0,5.4
2018-05-02 02:32:00,1999.7,6.7,-46.79,4.27,198.0,4.1
2018-05-02 02:53:00,2000.5,8.8,-46.74,4.16,220.0,2.0
2018-05-02 03:12:00,2000.1,6.0,-46.72,3.91,88.0,3.1
2018-05-02 03:33:00,2005.1,4.8,-46.8,4.03,220.0,3.1
2018-05-02 03:53:00,2001.3,8.8,-46.6,4.45,220.0,3.4
2018-05-02 04:12:00,2001.5,3.6,-46.94,3.95,176.0,3.1
2018-05-02 04:33:00,1998.9,6.2,-47.01,3.93,330.0,2.0
2018-05-02 04:52:00,1993.4,4.9,-46.7,3.99,220.0,3.7
2018-05-02 05:12:00,2005.7,6.0,-46.65,4.12,176.0,2.0
2018-05-02 05:32:00,2009.9,8.1,-46.91,3.94,176.0,4.8
2018-05-02 05:53:00,2011.4,4.5,-47.13,4.12,220.0,2.7
2018-05-02 06:13:00,2008.2,6.3,-46.95,4.16,264.0,5.4
2018-05-02 06:28:00,2019.8,6.3,-46.93,4.26,220.0,6.1
2018-05-02 08:22:00,2017.1,4.6,-47.01,4.37,308.0,3.4
2018-05-02 08:42:00,2015.3,10.1,-46.9,4.16,176.0,4.8
2018-05-02 09:03:00,2010.5,6.4,-46.95,3.84,220.0,6.8
2018-05-02 09:22:00,2009.9,9.9,-46.73,3.98,220.0,3.7
2018-05-02 09:42:00,2005.5,5.7,-46.93,4.28,176.0,2.7
2018-05-02 10:03:00,2003.5,4.8,-47.18,4.25,176.0,3.7
2018-05-02 10:21:00,2003.9,6.7,-47.2,4.42,176.0,5.8
2018-05-02 10:49:00,2007.5,7.2,-46.75,4.94,264.0,5.8
2018-05-02 11:09:00,2006.2,4.3,-46.46,4.31,220.0,4.4
2018-05-02 11:29:00,2005.5,6.2,-47.1,4.53,176.0,5.1
2018-05-02 11:49:00,2004.7,4.3,-46.88,4.01,176.0,4.8
2018-05-02 12:09:00,2002.8,3.7,-46.79,3.92,176.0,4.1
2018-05-02 12:29:00,1994.7,3.1,-46.83,3.84,132.0,2.7
2018-05-02 17:57:00,1988.7,5.1,-46.92,4.13,286.0,2.4
2018-05-02 18:18:00,1988.9,6.2,-46.84,4.26,264.0,2.7
2018-05-02 18:38:00,1993.9,5.5,-46.27,4.05,308.0,2.4
2018-05-02 18:57:00,2000.2,11.0,-46.48,4.11,308.0,1.0
2018-05-02 19:17:00,1982.1,3.4,-46.51,4.02,0.0,2.7
2018-05-02 19:33:00,1989.3,5.7,-46.0,4.28,286.0,1.7
2018-05-02 21:27:00,2120.2,14.5,-45.98,3.88,264.0,1.0
2018-05-02 21:47:00,2156.0,7.8,-46.11,3.86,264.0,1.7
2018-05-02 22:07:00,2165.5,7.8,-45.95,3.86,242.0,1.4
2018-05-02 22:27:00,2171.6,9.4,-46.14,3.49,308.0,1.0
2018-05-02 22:48:00,2206.1,7.0,-46.05,3.89,220.0,1.7
2018-05-02 23:08:00,2216.1,9.2,-46.21,3.67,308.0,2.0
2018-05-02 23:28:00,2207.3,15.8,-45.77,3.56,264.0,3.1
2018-05-02 23:48:00,2215.0,21.2,-45.85,3.7,264.0,1.7
2018-05-03 00:07:00,2173.3,13.0,-46.48,3.6,0.0,2.4
2018-05-03 00:27:00,2149.3,17.5,-46.21,3.76,264.0,2.7
2018-05-03 00:47:00,2138.1,19.5,-46.74,3.76,286.0,1.7
2018-05-03 01:08:00,2180.2,11.3,-46.59,3.7,220.0,1.7
2018-05-03 01:28:00,2166.6,7.3,-46.55,3.64,264.0,2.7
2018-05-03 01:47:00,2172.8,8.4,-46.33,3.76,264.0,1.4
2018-05-03 02:07:00,2183.9,4.4,-46.33,3.5,264.0,1.4
2018-05-03 02:28:00,2189.7,10.4,-46.27,3.49,308.0,1.4
2018-05-03 02:47:00,2192.4,8.9,-46.59,3.99,308.0,0.7
2018-05-03 03:08:00,2254.4,33.9,-46.22,3.64,264.0,0.7
2018-05-03 03:28:00,2335.4,9.6,-45.99,3.56,308.0,0.7
2018-05-03 03:48:00,2238.2,37.1,-46.0,3.92,264.0,1.0
2018-05-03 04:08:00,2186.5,12.2,-46.14,3.77,264.0,0.3
2018-05-03 04:28:00,2163.9,12.5,-46.3,3.77,264.0,0.3
2018-05-03 04:47:00,2125.4,8.6,-46.05,3.93,220.0,0.7
2018-05-03 05:08:00,2139.1,9.1,-46.09,3.76,264.0,1.4
2018-05-03 05:28:00,2161.8,14.4,-45.55,4.09,264.0,1.0
2018-05-03 05:47:00,2175.0,8.1,-45.65,3.78,220.0,0.7
2018-05-03 06:07:00,2164.7,4.6,-45.6,3.67,308.0,1.0
2018-05-03 06:27:00,2158.8,6.8,-45.79,3.83,264.0,0.7
2018-05-03 06:47:00,2208.5,31.8,-45.62,3.91,308.0,2.0
2018-05-03 07:07:00,2295.9,14.7,-45.33,3.55,264.0,1.7
2018-05-03 07:27:00,2306.3,9.6,-45.07,3.3,308.0,1.4
2018-05-03 07:47:00,2272.8,22.0,-45.13,3.52,220.0,1.4
2018-05-03 08:03:00,2239.5,2.7,-45.37,3.73,176.0,1.0
2018-05-03 09:59:00,2064.0,14.3,-46.08,3.66,308.0,0.3
2018-05-03 10:19:00,2060.2,13.9,-46.14,3.85,0.0,1.4
2018-05-03 10:37:00,2035.0,8.0,-46.48,4.09,264.0,2.7
2018-05-03 18:00:00,1985.9,4.7,-46.83,4.18,264.0,1.0
2018-05-03 18:20:00,1984.0,7.5,-46.96,4.05,264.0,1.0
2018-05-03 18:40:00,1982.9,5.2,-46.86,4.23,nan,nan
2018-05-03 19:01:00,2007.8,8.8,-46.29,4.1,nan,nan
2018-05-03 19:21:00,2028.1,10.3,-46.14,4.01,nan,nan
2018-05-03 19:36:00,2029.8,4.7,-46.51,3.83,nan,nan
2018-05-03 21:30:00,1999.9,3.4,-46.1,3.97,nan,nan
2018-05-03 21:50:00,2006.1,5.0,-46.18,3.91,nan,nan
2018-05-03 22:10:00,2007.3,4.2,-45.66,4.05,nan,nan
2018-05-03 22:30:00,2012.8,4.1,-45.65,4.14,nan,nan
2018-05-03 22:51:00,2007.9,5.7,-45.74,3.96,nan,nan
2018-05-03 23:11:00,2007.9,5.6,-45.95,4.05,nan,nan
2018-05-03 23:31:00,2015.1,6.1,-46.27,4.23,nan,nan
2018-05-03 23:50:00,2040.5,10.5,-45.7,4.12,nan,nan
2018-05-04 00:11:00,2062.3,8.9,-45.74,4.2,nan,nan
2018-05-04 00:31:00,2064.4,7.1,-45.75,3.98,nan,nan
2018-05-04 00:51:00,2059.5,8.1,-45.87,3.85,nan,nan
2018-05-04 01:11:00,2045.5,6.8,-45.68,3.93,nan,nan
2018-05-04 01:30:00,2058.5,8.1,-45.64,4.03,nan,nan
2018-05-04 01:50:00,2075.8,7.7,-45.64,3.89,nan,nan
2018-05-04 02:10:00,2090.4,15.6,-45.73,3.98,nan,nan
2018-05-04 02:30:00,2080.7,9.6,-45.05,3.91,nan,nan
2018-05-04 02:51:00,2065.3,8.3,-45.81,3.72,nan,nan
2018-05-04 03:10:00,2068.2,8.7,-45.83,3.57,nan,nan
2018-05-04 03:30:00,2108.6,17.6,-45.61,3.66,nan,nan
2018-05-04 03:51:00,2153.0,7.6,-45.09,3.89,nan,nan
2018-05-04 04:11:00,2180.6,18.9,-45.14,3.84,nan,nan
2018-05-04 04:31:00,2200.9,10.7,-45.51,3.97,nan,nan
2018-05-04 04:51:00,2196.5,10.6,-44.96,3.83,nan,nan
2018-05-04 05:11:00,2202.9,12.7,-44.92,3.68,nan,nan
2018-05-04 05:31:00,2158.8,13.9,-45.23,3.72,nan,nan
2018-05-04 05:51:00,2176.0,18.8,-45.12,3.72,nan,nan
2018-05-04 06:10:00,2172.3,15.9,-45.33,3.72,nan,nan
2018-05-04 06:31:00,2154.4,6.3,-45.16,3.83,nan,nan
2018-05-04 06:50:00,2145.6,21.9,-44.95,3.79,220.0,1.4
2018-05-04 07:10:00,2107.5,15.5,-45.39,3.66,0.0,0.7
2018-05-04 07:30:00,2062.8,11.3,-45.42,3.84,88.0,0.3
2018-05-04 07:51:00,2047.3,14.2,-45.63,3.94,0.0,0.7
2018-05-04 08:06:00,2013.9,5.8,-45.57,4.27,220.0,1.0
2018-05-04 10:01:00,1984.6,4.6,-45.74,4.1,nan,nan
2018-05-04 10:21:00,1982.2,6.1,-45.83,3.97,nan,nan
2018-05-04 10:41:00,1977.7,3.9,-45.47,3.94,264.0,1.7
2018-05-04 11:01:00,1975.4,4.0,-45.75,4.31,nan,nan
2018-05-04 11:21:00,1980.2,8.2,-45.61,4.12,nan,nan
2018-05-04 11:41:00,1979.1,7.1,-45.92,4.19,nan,nan
2018-05-04 12:00:00,1978.1,5.9,-45.31,4.1,nan,nan
2018-05-04 12:20:00,1976.5,6.7,-45.57,4.02,nan,nan
2018-05-04 12:41:00,1984.7,5.7,-45.45,4.24,220.0,1.4
2018-05-04 13:01:00,1981.3,5.6,-45.36,4.18,264.0,1.0
2018-05-04 13:20:00,1968.8,6.3,-45.65,4.26,nan,nan
2018-05-04 13:40:00,1980.6,9.3,-45.7,4.04,nan,nan
2018-05-04 14:00:00,1977.6,4.1,-45.07,3.83,nan,nan
2018-05-04 14:15:00,1981.4,6.0,-45.29,3.8,nan,nan
2018-05-04 17:48:00,1979.6,5.1,-45.78,3.91,308.0,1.0
2018-05-04 18:09:00,1985.6,6.6,-45.69,4.14,308.0,1.0
2018-05-04 18:29:00,2026.2,31.7,-44.95,4.17,88.0,1.7
2018-05-04 18:48:00,2122.9,43.0,-45.2,4.01,88.0,3.1
2018-05-04 19:08:00,2097.7,16.7,-45.25,4.25,110.0,2.7
2018-05-04 19:24:00,2088.8,12.0,-45.67,4.01,88.0,3.4
2018-05-04 21:19:00,2034.8,11.9,-45.0,4.07,nan,nan
2018-05-04 21:39:00,2061.2,17.1,-45.57,3.89,220.0,1.0
2018-05-04 21:59:00,2098.1,18.7,-45.64,3.97,176.0,1.7
2018-05-04 22:19:00,2078.5,10.6,-45.18,4.13,176.0,1.4
2018-05-04 22:38:00,2078.9,12.5,-45.45,4.15,nan,nan
2018-05-04 22:59:00,2113.0,25.6,-44.98,3.82,220.0,0.0
2018-05-04 23:19:00,2168.8,41.0,-45.34,3.73,nan,nan
2018-05-04 23:38:00,2166.1,26.8,-45.41,3.71,nan,nan
2018-05-04 23:58:00,2209.3,38.0,-45.16,3.79,308.0,0.7
2018-05-05 00:18:00,2262.1,31.8,-44.91,3.7,nan,nan
2018-05-05 00:39:00,2218.3,15.4,-45.03,3.88,264.0,0.7
2018-05-05 00:59:00,2183.9,25.2,-44.94,3.67,308.0,0.7
2018-05-05 01:19:00,2202.0,34.3,-44.6,3.61,nan,nan
2018-05-05 01:38:00,2195.3,12.2,-45.36,3.78,308.0,0.7
2018-05-05 01:59:00,2210.2,21.5,-44.96,3.72,nan,nan
2018-05-05 02:19:00,2384.4,60.0,-44.66,3.27,nan,nan
2018-05-05 02:39:00,2477.0,29.4,-44.34,3.21,nan,nan
2018-05-05 02:59:00,2543.2,13.0,-45.46,3.45,44.0,1.7
2018-05-05 03:18:00,2308.9,64.3,-45.82,3.45,nan,nan
2018-05-05 03:39:00,2209.4,6.8,-45.52,3.54,132.0,1.7
2018-05-05 03:59:00,2212.6,4.0,-45.05,3.4,nan,nan
2018-05-05 04:18:00,2261.9,21.7,-44.93,3.46,nan,nan
2018-05-05 04:38:00,2284.0,3.6,-45.26,3.55,132.0,0.7
2018-05-05 04:59:00,2298.4,30.2,-45.25,3.63,132.0,1.4
2018-05-05 05:19:00,2510.0,95.5,-44.75,3.32,264.0,0.3
2018-05-05 05:39:00,2596.9,13.2,-45.59,3.05,0.0,0.3
2018-05-05 05:58:00,2620.9,39.8,-45.21,3.12,nan,nan
2018-05-05 06:18:00,2408.2,61.2,-45.29,3.34,nan,nan
2018-05-05 06:39:00,2437.9,51.5,-45.27,3.34,nan,nan
2018-05-05 06:59:00,2321.1,22.7,-45.44,3.33,nan,nan
2018-05-05 07:18:00,2235.8,31.2,-45.24,3.55,88.0,3.1
2018-05-05 07:39:00,2158.9,29.6,-45.77,3.66,nan,nan
2018-05-05 07:54:00,2098.7,7.4,-45.82,3.52,nan,nan
2018-05-05 09:49:00,2049.1,24.6,-45.93,3.77,88.0,0.7
2018-05-05 10:09:00,2043.6,18.0,-46.77,4.0,44.0,3.1
2018-05-05 10:29:00,2035.8,15.4,-46.27,3.85,132.0,3.1
2018-05-05 10:49:00,2052.2,34.7,-46.7,3.9,88.0,3.4
2018-05-05 11:09:00,2099.9,72.3,-46.36,3.83,88.0,1.7
2018-05-05 11:29:00,2031.1,11.5,-46.54,3.97,88.0,2.4
2018-05-05 11:48:00,2054.1,67.2,-46.09,4.05,264.0,1.4
2018-05-05 12:09:00,2044.9,46.1,-46.59,3.91,88.0,1.4
2018-05-05 12:29:00,2035.6,32.3,-46.6,3.95,132.0,1.7
2018-05-05 12:48:00,2057.1,42.7,-46.35,3.96,88.0,3.7
2018-05-05 13:08:00,2030.5,6.3,-46.79,4.06,88.0,2.4
2018-05-05 13:29:00,2052.5,18.6,-46.24,4.04,132.0,1.7
2018-05-05 13:49:00,2087.0,55.5,-45.84,3.87,88.0,3.4
2018-05-05 14:08:00,2041.3,28.6,-46.13,4.13,330.0,3.4
2018-05-05 14:29:00,2057.4,40.6,-46.03,3.63,242.0,3.7
2018-05-05 14:48:00,2084.4,58.9,-46.32,3.92,88.0,3.1
2018-05-05 15:08:00,2058.3,92.0,-46.02,3.81,154.0,4.1
2018-05-05 15:28:00,2057.9,49.5,-46.55,4.03,132.0,3.1
2018-05-05 15:49:00,2104.1,100.1,-46.03,4.1,132.0,2.7
2018-05-05 16:09:00,2042.9,21.4,-46.11,4.15,132.0,1.4
2018-05-05 16:29:00,2072.4,63.4,-46.26,3.93,88.0,3.7
2018-05-05 16:49:00,2049.2,12.1,-46.08,3.94,132.0,3.1
2018-05-05 17:09:00,2054.0,17.6,-45.86,3.7,132.0,3.7
2018-05-05 17:28:00,2070.6,41.3,-46.42,3.95,88.0,3.4
2018-05-05 17:48:00,2043.9,7.0,-46.05,3.95,132.0,2.4
2018-05-05 18:08:00,2051.9,17.6,-46.0,3.89,88.0,2.7
2018-05-05 18:28:00,2044.6,4.5,-46.27,3.94,132.0,4.1
2018-05-05 18:49:00,2069.2,9.2,-45.83,4.1,132.0,3.1
2018-05-05 19:09:00,2075.5,7.8,-45.9,3.73,132.0,2.4
2018-05-05 19:24:00,2081.5,8.6,-45.98,4.26,110.0,2.4
2018-05-05 21:19:00,2072.6,2.6,-45.79,4.05,88.0,1.7
2018-05-05 21:39:00,2085.4,5.5,-46.32,3.84,88.0,2.4
2018-05-05 22:00:00,2113.6,6.4,-46.13,4.14,88.0,2.4
2018-05-05 22:20:00,2145.4,10.6,-46.22,3.88,132.0,1.4
2018-05-05 22:40:00,2145.8,17.1,-45.73,3.86,44.0,1.4
2018-05-05 23:00:00,2117.3,9.2,-45.68,3.87,44.0,1.7
2018-05-05 23:19:00,2118.7,11.2,-45.68,3.73,0.0,1.0
2018-05-05 23:40:00,2106.1,7.2,-45.79,3.7,132.0,0.3
2018-05-06 00:00:00,2078.3,6.2,-45.83,3.93,44.0,1.4
2018-05-06 00:19:00,2082.3,9.0,-45.79,3.96,0.0,1.4
2018-05-06 00:40:00,2140.2,31.1,-45.7,4.06,44.0,0.7
2018-05-06 01:00:00,2155.5,5.6,-45.51,3.84,0.0,1.4
2018-05-06 01:20:00,2152.4,14.0,-45.52,3.79,44.0,0.3
2018-05-06 01:40:00,2165.7,16.0,-45.56,3.82,0.0,1.0
2018-05-06 02:00:00,2151.3,4.7,-45.59,3.72,0.0,0.7
2018-05-06 02:20:00,2147.2,4.5,-45.85,3.58,44.0,0.3
2018-05-06 02:40:00,2154.1,6.6,-45.49,3.75,132.0,0.7
2018-05-06 02:59:00,2152.6,7.6,-45.79,4.06,66.0,1.0
2018-05-06 03:19:00,2143.6,15.7,-45.28,3.69,nan,nan
2018-05-06 03:39:00,2136.3,10.4,-45.84,3.78,44.0,0.7
2018-05-06 04:00:00,2129.8,6.5,-45.47,4.03,0.0,0.7
2018-05-06 04:19:00,2135.8,9.1,-46.19,3.78,308.0,1.7
2018-05-06 04:40:00,2116.6,7.0,-45.99,3.89,nan,nan
2018-05-06 04:59:00,2150.1,11.9,-45.87,3.85,0.0,0.3
2018-05-06 05:19:00,2179.0,17.7,-45.33,3.76,264.0,0.0
2018-05-06 05:39:00,2283.4,34.7,-44.74,3.75,nan,nan
2018-05-06 06:00:00,2247.3,56.8,-45.16,4.06,nan,nan
2018-05-06 06:20:00,2222.5,38.9,-45.16,3.94,nan,nan
2018-05-06 06:39:00,2241.0,39.0,-44.95,3.73,264.0,1.0
2018-05-06 06:59:00,2250.6,27.6,-45.32,3.84,308.0,0.3
2018-05-06 07:19:00,2230.7,12.7,-45.35,3.61,264.0,0.7
2018-05-06 07:40:00,2247.2,85.2,-45.33,3.93,88.0,1.4
2018-05-06 07:55:00,2302.4,96.3,-45.12,3.68,264.0,2.7
2018-05-06 09:49:00,2158.1,36.7,-45.38,3.89,nan,3.7
2018-05-06 10:09:00,2092.9,23.3,-45.73,4.02,88.0,3.7
2018-05-06 10:30:00,2072.9,35.7,-45.51,3.58,132.0,4.4
2018-05-06 10:50:00,2068.0,25.6,-45.3,4.17,176.0,2.7
2018-05-06 11:10:00,2031.6,8.4,-46.09,4.39,132.0,5.8
2018-05-06 11:30:00,2126.9,79.5,-45.78,4.16,264.0,4.1
2018-05-06 11:50:00,2103.1,50.4,-45.91,3.86,88.0,2.7
2018-05-06 12:10:00,2077.7,25.6,-45.72,3.92,88.0,1.7
2018-05-06 12:30:00,2066.1,28.8,-45.55,3.86,132.0,1.7
2018-05-06 12:50:00,2074.9,47.3,-45.96,3.8,264.0,3.7
2018-05-06 13:09:00,2089.9,55.1,-45.27,4.13,88.0,3.7
2018-05-06 13:29:00,2088.5,72.2,-45.4,4.05,88.0,1.7
2018-05-06 13:50:00,2055.7,60.1,-45.62,3.87,88.0,2.7
2018-05-06 14:10:00,2105.2,45.1,-45.21,4.14,264.0,1.0
2018-05-06 14:29:00,2067.6,19.7,-45.8,4.02,132.0,1.4
2018-05-06 14:50:00,2061.6,26.2,-45.3,3.96,0.0,1.7
2018-05-06 15:10:00,2082.8,80.7,-44.73,4.02,264.0,2.4
2018-05-06 15:30:00,2069.8,40.5,-45.63,3.9,88.0,2.4
2018-05-06 15:50:00,2078.6,73.2,-45.18,4.15,132.0,1.7
2018-05-06 16:10:00,2039.9,23.3,-45.62,4.23,88.0,2.4
2018-05-06 16:30:00,2068.8,35.1,-45.24,3.91,308.0,2.4
2018-05-06 16:50:00,2049.3,14.6,-45.74,4.12,88.0,2.7
2018-05-06 17:09:00,2047.6,11.2,-45.72,4.02,88.0,2.4
2018-05-06 17:29:00,2061.8,19.2,-45.74,4.28,88.0,2.0
2018-05-06 17:50:00,2073.4,25.7,-45.78,4.18,132.0,2.0
2018-05-06 18:09:00,2075.9,6.9,-46.21,4.08,0.0,0.7
2018-05-06 18:30:00,2112.5,35.9,-45.07,4.05,0.0,3.1
2018-05-06 18:50:00,2166.8,7.5,-45.7,3.7,66.0,2.7
2018-05-06 19:10:00,2110.0,32.3,-45.78,3.87,0.0,3.7
2018-05-06 19:25:00,2079.7,10.9,-46.23,4.4,44.0,2.4
2018-05-06 21:20:00,2175.9,39.6,-45.9,3.81,88.0,1.0
2018-05-06 21:40:00,2194.9,11.5,-45.59,3.69,110.0,2.7
2018-05-06 22:00:00,2183.4,6.2,-45.81,3.6,88.0,1.0
2018-05-06 22:20:00,2194.7,9.7,-45.96,3.77,88.0,1.7
2018-05-06 22:40:00,2253.1,27.6,-45.29,3.91,88.0,1.4
2018-05-06 23:01:00,2247.5,4.5,-45.92,3.82,132.0,1.4
2018-05-06 23:20:00,2293.1,15.6,-45.47,3.49,132.0,1.4
2018-05-06 23:40:00,2286.0,23.9,-45.19,3.88,88.0,1.0
2018-05-07 00:01:00,2305.4,22.1,-45.3,3.56,110.0,1.4
2018-05-07 00:21:00,2395.0,42.6,-44.99,3.49,44.0,0.7
2018-05-07 00:41:00,2392.5,17.0,-44.64,3.47,308.0,0.3
2018-05-07 01:01:00,2397.6,8.9,-44.49,3.55,0.0,0.7
2018-05-07 01:21:00,2390.1,4.7,-44.25,3.46,88.0,1.0
2018-05-07 01:41:00,2459.0,34.0,-44.09,3.66,0.0,0.0
2018-05-07 02:01:00,2550.5,50.3,-44.23,3.59,176.0,0.0
2018-05-07 02:21:00,2599.7,21.6,-43.86,3.2,308.0,0.3
2018-05-07 02:41:00,2508.9,55.8,-43.62,3.57,44.0,0.0
2018-05-07 03:01:00,2406.1,9.3,-44.03,3.54,308.0,0.7
2018-05-07 03:21:00,2402.7,9.4,-43.7,3.53,66.0,0.3
2018-05-07 03:41:00,2434.5,12.0,-43.09,3.54,132.0,0.3
2018-05-07 04:01:00,2431.0,20.4,-43.18,3.4,88.0,1.0
2018-05-07 04:21:00,2513.9,50.9,-43.47,3.23,88.0,1.0
2018-05-07 04:41:00,2426.0,10.6,-43.63,3.38,88.0,0.3
2018-05-07 05:00:00,2503.9,60.6,-43.54,3.28,88.0,0.7
2018-05-07 05:20:00,2515.9,11.9,-43.21,3.43,88.0,0.3
2018-05-07 05:41:00,2510.6,44.6,-43.61,3.35,264.0,0.0
2018-05-07 06:01:00,2575.6,18.7,-43.05,3.51,308.0,0.3
2018-05-07 06:20:00,2568.7,18.4,-43.53,3.42,308.0,1.0
2018-05-07 06:40:00,2580.6,38.0,-43.49,3.29,44.0,0.7
2018-05-07 07:00:00,2557.7,75.6,-43.43,3.47,nan,nan
2018-05-07 07:21:00,2390.2,79.6,-43.47,3.46,330.0,1.4
2018-05-07 07:40:00,2281.2,22.3,-44.25,3.75,286.0,0.7
2018-05-07 07:56:00,2228.5,17.6,-44.22,3.74,264.0,1.0
2018-05-07 09:50:00,2080.4,26.9,-44.89,4.1,88.0,0.7
2018-05-07 10:11:00,2097.4,61.0,-44.37,4.11,132.0,1.7
2018-05-07 10:30:00,2077.0,31.4,-44.32,3.94,132.0,1.0
2018-05-07 10:50:00,2084.7,70.8,-44.2,4.0,44.0,2.4
2018-05-07 11:11:00,2043.1,20.8,-44.37,3.96,0.0,1.4
2018-05-07 11:30:00,2027.0,17.2,-44.7,4.03,0.0,1.4
2018-05-07 11:50:00,1994.7,14.6,-44.67,4.44,88.0,2.7
2018-05-07 12:11:00,1990.4,11.5,-44.9,4.27,88.0,2.0
2018-05-07 12:31:00,1973.4,16.5,-45.41,4.24,132.0,2.0
2018-05-07 12:51:00,2008.9,33.0,-44.56,4.15,132.0,1.4
2018-05-07 13:11:00,2030.8,68.4,-44.86,3.93,88.0,1.7
2018-05-07 13:30:00,2006.7,24.8,-45.13,4.16,0.0,1.4
2018-05-07 13:50:00,2025.5,44.0,-44.96,4.36,132.0,2.4
2018-05-07 14:11:00,2054.1,62.5,-45.36,4.09,0.0,2.7
2018-05-07 14:31:00,2045.9,35.6,-44.89,4.39,88.0,2.7
2018-05-07 14:51:00,2036.4,29.8,-45.49,4.54,132.0,2.7
2018-05-07 15:10:00,2054.4,44.3,-44.96,4.17,308.0,1.4
2018-05-07 15:30:00,2018.6,13.1,-45.77,4.02,88.0,3.7
2018-05-07 15:50:00,2028.5,26.8,-45.52,4.36,132.0,3.7
2018-05-07 16:11:00,2022.8,34.6,-45.3,4.09,88.0,3.4
2018-05-07 16:31:00,2033.0,50.2,-45.07,4.44,110.0,3.4
2018-05-07 16:50:00,2039.5,56.6,-45.15,4.45,88.0,1.7
2018-05-07 17:10:00,2089.7,65.2,-44.74,4.1,88.0,2.4
2018-05-07 17:30:00,2043.9,43.7,-45.3,4.27,286.0,3.1
2018-05-07 17:51:00,2035.8,17.1,-45.06,4.01,286.0,2.7
2018-05-07 18:10:00,2051.6,32.9,-44.72,4.4,88.0,2.4
2018-05-07 18:31:00,2037.8,27.1,-44.95,4.51,132.0,3.4
2018-05-07 18:51:00,2054.0,32.3,-45.1,3.89,330.0,2.7
2018-05-07 19:10:00,2068.5,9.0,-45.28,4.32,88.0,2.7
2018-05-07 19:26:00,2086.8,6.0,-44.74,4.65,88.0,2.0
2018-05-07 21:21:00,2157.5,6.7,-45.25,4.01,132.0,1.7
2018-05-07 21:41:00,2191.3,13.0,-45.84,3.72,176.0,1.4
2018-05-07 22:01:00,2237.5,13.2,-44.84,3.97,88.0,1.7
2018-05-07 22:21:00,2279.9,11.1,-44.86,3.73,132.0,1.4
2018-05-07 22:41:00,2304.8,19.5,-45.34,3.66,110.0,2.0
2018-05-07 23:02:00,2362.4,11.9,-45.22,3.44,88.0,1.7
2018-05-07 23:22:00,2383.5,11.0,-44.95,3.44,nan,nan
2018-05-07 23:42:00,2383.2,12.8,-44.6,3.64,nan,nan
2018-05-08 00:02:00,2417.6,17.3,-45.19,3.5,132.0,1.7
2018-05-08 00:22:00,2507.1,24.3,-45.03,3.54,88.0,1.0
2018-05-08 00:42:00,2580.8,10.8,-45.14,3.29,44.0,1.0
2018-05-08 01:02:00,2609.0,8.0,-45.1,3.15,132.0,1.7
2018-05-08 01:22:00,2603.2,16.4,-45.27,3.17,132.0,1.0
2018-05-08 01:42:00,2533.1,28.5,-45.51,3.46,88.0,1.0
2018-05-08 02:01:00,2548.9,20.7,-45.35,3.36,154.0,0.0
2018-05-08 02:22:00,2679.5,76.0,-45.03,3.24,308.0,0.3
2018-05-08 02:42:00,2809.5,23.7,-44.57,2.96,308.0,0.0
2018-05-08 03:02:00,2783.4,20.4,-44.65,3.01,308.0,0.3
2018-05-08 03:21:00,2800.4,26.3,-44.68,3.02,88.0,0.3
2018-05-08 03:41:00,2892.6,50.3,-44.62,3.21,220.0,0.0
2018-05-08 04:01:00,2941.1,15.8,-44.63,2.97,88.0,0.0
2018-05-08 04:22:00,2972.7,14.6,-44.49,2.57,0.0,0.0
2018-05-08 04:42:00,3016.8,29.4,-44.1,2.77,308.0,0.3
2018-05-08 05:02:00,2971.6,56.1,-43.61,2.77,264.0,0.0
2018-05-08 05:22:00,2990.2,49.0,-44.14,2.98,308.0,0.3
2018-05-08 05:42:00,2947.0,33.2,-43.41,2.81,220.0,0.3
2018-05-08 06:01:00,2927.8,51.3,-43.51,3.11,nan,nan
2018-05-08 06:21:00,2998.3,49.1,-43.55,2.94,nan,nan
2018-05-08 06:42:00,2966.2,80.8,-43.67,2.79,nan,nan
2018-05-08 07:01:00,2818.9,33.4,-43.73,3.08,22.0,0.3
2018-05-08 07:21:00,2675.2,72.3,-43.53,3.12,308.0,0.3
2018-05-08 07:42:00,2488.4,63.5,-43.46,3.4,nan,0.0
2018-05-08 07:57:00,2374.3,12.6,-43.71,3.43,220.0,0.7
2018-05-08 09:51:00,2106.4,9.4,-44.99,4.19,132.0,0.7
2018-05-08 10:12:00,2118.3,8.0,-44.77,3.87,220.0,2.4
2018-05-08 10:31:00,2075.0,20.9,-44.82,4.63,88.0,2.4
2018-05-08 10:52:00,2050.6,16.0,-44.5,4.29,220.0,2.7
2018-05-08 11:12:00,2053.6,13.2,-45.11,4.21,264.0,3.1
2018-05-08 11:32:00,2055.3,16.8,-44.57,4.47,330.0,2.4
2018-05-08 11:51:00,2030.1,8.8,-44.83,4.39,220.0,2.4
2018-05-08 12:12:00,2028.6,16.0,-44.55,4.47,220.0,2.0
2018-05-08 12:32:00,2031.1,13.7,-44.9,4.42,220.0,3.7
2018-05-08 12:52:00,2020.8,6.2,-44.77,4.32,264.0,4.4
2018-05-08 13:12:00,2025.7,17.2,-45.05,4.35,264.0,3.7
2018-05-08 13:32:00,2022.6,8.1,-44.68,4.27,176.0,2.4
2018-05-08 13:51:00,2033.1,10.5,-44.32,4.44,264.0,2.7
2018-05-08 14:11:00,2030.5,10.8,-44.36,4.29,308.0,2.0
2018-05-08 14:31:00,2023.1,11.2,-44.72,4.24,198.0,4.1
2018-05-08 14:52:00,2018.7,10.0,-44.44,4.76,264.0,2.4
2018-05-08 15:12:00,2021.9,10.4,-45.24,4.57,220.0,4.4
2018-05-08 15:32:00,2035.0,18.4,-45.19,4.15,132.0,2.0
2018-05-08 15:52:00,2016.6,14.2,-44.55,4.47,264.0,3.7
2018-05-08 16:12:00,2005.6,8.5,-45.25,4.46,0.0,4.1
2018-05-08 16:32:00,2008.8,9.7,-45.23,4.42,264.0,2.0
2018-05-08 16:51:00,2003.2,9.8,-45.3,4.26,220.0,2.7
2018-05-08 17:11:00,2001.6,13.1,-45.74,4.55,0.0,5.4
2018-05-08 17:31:00,1988.0,13.0,-45.33,4.74,308.0,2.4
2018-05-08 17:51:00,1969.4,5.3,-44.79,4.35,264.0,4.4
2018-05-08 18:12:00,1963.8,8.2,-45.29,4.08,264.0,3.7
2018-05-08 18:32:00,1957.7,4.4,-45.37,4.34,264.0,3.1
2018-05-08 18:51:00,1960.9,8.7,-44.86,4.17,264.0,5.4
2018-05-08 19:11:00,1957.6,4.1,-44.9,4.4,308.0,4.1
2018-05-08 19:27:00,1961.3,7.0,-44.74,4.48,264.0,4.1
2018-05-08 21:22:00,1983.5,3.6,-45.06,4.34,264.0,3.4
2018-05-08 21:43:00,1985.4,3.8,-44.64,4.34,330.0,3.7
2018-05-08 22:03:00,1982.7,3.6,-44.88,4.43,176.0,3.1
2018-05-08 22:23:00,1992.0,3.9,-45.24,4.12,308.0,3.1
2018-05-08 22:42:00,1996.1,6.0,-45.03,4.13,308.0,3.4
2018-05-08 23:03:00,2014.7,4.8,-45.12,4.27,242.0,2.4
2018-05-08 23:23:00,2014.2,5.2,-45.25,4.66,308.0,2.0
2018-05-08 23:42:00,2021.5,5.2,-45.38,4.33,308.0,2.7
2018-05-09 00:03:00,2025.1,4.8,-45.48,4.26,0.0,3.1
2018-05-09 00:22:00,2046.9,5.9,-45.56,4.06,308.0,1.4
2018-05-09 00:43:00,2045.6,5.1,-45.85,3.93,176.0,1.7
2018-05-09 01:03:00,2051.4,3.8,-45.94,4.09,220.0,1.0
2018-05-09 01:22:00,2063.6,6.9,-45.3,4.15,176.0,1.4
2018-05-09 01:43:00,2080.3,6.0,-45.4,4.02,308.0,1.4
2018-05-09 02:03:00,2084.1,9.6,-45.26,4.19,264.0,1.0
2018-05-09 02:22:00,2118.1,7.1,-45.13,3.99,264.0,0.7
2018-05-09 02:42:00,2115.1,7.7,-45.23,3.74,308.0,1.0
2018-05-09 03:02:00,2110.7,4.4,-45.66,4.0,264.0,1.7
2018-05-09 03:22:00,2114.8,4.8,-45.43,4.0,286.0,1.7
2018-05-09 03:42:00,2141.5,21.2,-45.54,3.58,264.0,0.7
2018-05-09 04:02:00,2171.4,5.1,-45.46,3.48,264.0,1.7
2018-05-09 04:22:00,2178.5,5.9,-45.89,3.83,264.0,0.7
2018-05-09 04:42:00,2195.2,15.7,-45.9,3.8,264.0,0.7
2018-05-09 05:03:00,2257.4,21.7,-45.76,3.74,264.0,1.0
2018-05-09 05:22:00,2264.6,7.1,-45.33,3.66,308.0,0.3
2018-05-09 05:43:00,2249.6,12.2,-44.99,3.68,220.0,1.0
2018-05-09 06:03:00,2268.0,4.6,-45.36,3.6,308.0,0.3
2018-05-09 06:22:00,2271.3,4.3,-45.32,3.54,220.0,0.7
2018-05-09 06:42:00,2259.4,6.0,-45.73,3.62,220.0,0.3
2018-05-09 07:03:00,2266.2,10.2,-45.81,3.46,308.0,0.3
2018-05-09 07:23:00,2232.3,7.2,-45.49,3.6,264.0,1.0
2018-05-09 07:43:00,2220.4,7.7,-45.49,3.63,264.0,0.7
2018-05-09 07:58:00,2211.0,8.0,-45.37,3.73,88.0,1.0
2018-05-09 09:53:00,1999.9,4.0,-45.95,4.05,264.0,2.0
2018-05-09 10:13:00,1984.5,5.7,-46.13,4.3,220.0,3.1
2018-05-09 10:28:00,1979.8,6.8,-46.64,4.21,330.0,1.0
2018-05-09 14:40:00,1967.8,7.2,-46.98,4.62,198.0,2.7
2018-05-09 15:01:00,1967.5,4.5,-47.44,4.27,176.0,1.0
2018-05-09 15:21:00,1974.5,4.6,-47.71,4.37,220.0,2.4
2018-05-09 15:40:00,1976.0,4.4,-47.49,4.46,0.0,1.7
2018-05-09 16:00:00,1972.5,4.8,-47.64,3.79,220.0,2.4
2018-05-09 16:16:00,1983.4,7.8,-47.43,4.34,264.0,2.4
2018-05-09 18:10:00,1991.7,4.7,-47.31,4.1,264.0,2.7
2018-05-09 18:31:00,1992.2,4.7,-46.68,4.34,176.0,3.7
2018-05-09 18:51:00,1998.3,4.4,-46.66,4.19,220.0,1.7
2018-05-09 19:11:00,1993.8,4.3,-46.87,4.42,264.0,2.7
2018-05-09 19:30:00,1989.2,5.5,-46.44,4.33,308.0,3.4
2018-05-09 19:51:00,1990.2,3.5,-47.11,4.26,264.0,2.7
2018-05-09 20:11:00,2002.6,8.4,-46.66,4.16,308.0,3.1
2018-05-09 20:31:00,1997.5,3.4,-46.69,4.08,176.0,1.0
2018-05-09 20:51:00,2003.1,5.5,-46.39,4.06,308.0,2.7
2018-05-09 21:11:00,1995.2,3.9,-46.69,4.25,264.0,4.8
2018-05-09 21:30:00,1997.8,4.6,-46.97,4.32,88.0,4.1
2018-05-09 21:50:00,2002.5,2.6,-46.57,4.06,308.0,3.4
2018-05-09 22:11:00,2004.2,4.1,-46.71,4.4,308.0,1.7
2018-05-09 22:30:00,2013.4,5.5,-46.56,4.14,220.0,1.7
2018-05-09 22:50:00,2024.2,4.7,-46.34,4.23,308.0,1.0
2018-05-09 23:10:00,2022.0,10.5,-46.44,4.19,308.0,2.4
2018-05-09 23:31:00,1992.2,5.0,-46.54,4.32,220.0,3.7
2018-05-09 23:51:00,1988.7,4.4,-46.59,4.23,176.0,2.0
2018-05-10 00:11:00,1990.0,5.6,-46.84,4.27,308.0,1.0
2018-05-10 00:31:00,1988.2,3.5,-46.48,3.97,220.0,2.0
2018-05-10 00:50:00,1985.1,5.5,-46.5,4.37,264.0,2.7
2018-05-10 01:11:00,1986.5,3.0,-46.98,4.2,264.0,3.1
2018-05-10 01:31:00,1983.1,7.4,-46.51,4.11,176.0,1.4
2018-05-10 01:51:00,1986.4,5.7,-46.94,3.99,308.0,2.0
2018-05-10 02:10:00,1985.6,4.5,-47.02,3.83,176.0,2.0
2018-05-10 02:30:00,1986.5,2.6,-46.6,3.93,308.0,2.4
2018-05-10 02:50:00,1988.2,3.1,-46.69,4.24,264.0,2.4
2018-05-10 03:11:00,1985.6,3.4,-46.53,4.23,264.0,0.7
2018-05-10 03:30:00,1986.7,2.8,-46.64,4.45,220.0,2.0
2018-05-10 03:50:00,1987.9,4.3,-46.64,3.83,0.0,1.0
2018-05-10 04:10:00,2006.4,4.2,-46.53,4.17,242.0,2.0
2018-05-10 04:30:00,1997.2,3.9,-46.69,4.38,286.0,2.4
2018-05-10 04:46:00,2003.9,2.2,-46.93,3.49,242.0,2.7
2018-05-10 06:40:00,1991.8,5.4,-46.86,4.2,220.0,2.7
2018-05-10 07:00:00,1991.1,4.7,-47.04,4.29,308.0,2.4
2018-05-10 07:20:00,1991.0,8.2,-46.67,4.35,0.0,4.1
2018-05-10 07:41:00,1985.5,4.3,-46.91,4.11,308.0,2.7
2018-05-10 08:01:00,1983.8,2.9,-46.8,4.36,176.0,2.0
2018-05-10 08:20:00,1981.6,5.5,-46.98,4.36,308.0,3.4
2018-05-10 08:40:00,1981.6,3.4,-47.03,3.84,264.0,3.7
2018-05-10 09:00:00,1978.0,5.6,-47.08,4.2,88.0,2.4
2018-05-10 09:20:00,1969.9,2.9,-47.34,4.54,220.0,5.1
2018-05-10 09:41:00,1967.1,2.8,-47.26,4.49,264.0,3.7
2018-05-10 10:01:00,1969.0,4.9,-47.21,4.21,286.0,3.1
2018-05-10 10:20:00,1961.2,3.1,-46.71,4.23,220.0,3.4
2018-05-10 10:41:00,1958.6,3.2,-47.06,4.45,308.0,4.1
2018-05-10 11:00:00,1958.6,2.4,-46.99,4.04,308.0,3.7
2018-05-10 11:20:00,1959.1,4.5,-47.27,4.06,264.0,4.1
2018-05-10 11:41:00,1958.1,3.5,-46.83,4.18,308.0,3.4
2018-05-10 12:00:00,1962.3,3.6,-47.13,3.84,198.0,3.4
2018-05-10 12:20:00,1964.3,3.1,-46.76,4.16,308.0,4.8
2018-05-10 12:40:00,1961.1,4.3,-47.29,3.99,264.0,3.1
2018-05-10 13:00:00,1958.9,3.6,-46.88,3.93,264.0,4.1
2018-05-10 13:21:00,1960.7,6.2,-47.15,4.22,308.0,3.7
2018-05-10 13:41:00,1958.7,5.9,-46.91,4.26,264.0,4.8
2018-05-10 14:01:00,1961.0,4.9,-46.87,3.87,264.0,3.7
2018-05-10 14:20:00,1956.8,3.9,-47.03,4.22,286.0,4.1
2018-05-10 14:41:00,1954.9,4.1,-47.1,3.97,264.0,1.7
2018-05-10 15:00:00,1958.0,3.9,-46.97,3.99,286.0,3.1
2018-05-10 15:16:00,1957.7,3.2,-47.73,4.23,132.0,3.4
2018-05-10 16:36:00,1962.4,3.9,-46.97,3.98,264.0,1.7
2018-05-10 16:56:00,1960.3,4.1,-47.17,4.13,264.0,3.4
2018-05-10 17:16:00,1963.0,5.1,-47.3,4.29,308.0,2.4
2018-05-10 17:37:00,1965.3,5.8,-47.29,4.46,308.0,0.7
2018-05-10 17:56:00,1960.9,3.9,-47.74,4.28,264.0,1.0
2018-05-10 18:12:00,1964.3,6.8,-47.73,3.75,308.0,0.7
2018-05-10 20:06:00,1999.6,6.2,-46.93,4.18,264.0,1.7
2018-05-10 20:27:00,2016.2,3.4,-46.67,4.56,176.0,1.7
2018-05-10 20:46:00,2011.8,5.4,-46.67,4.33,264.0,0.7
2018-05-10 21:07:00,2030.3,7.2,-46.29,4.04,44.0,0.3
2018-05-10 21:27:00,2045.5,8.3,-46.51,3.88,264.0,2.0
2018-05-10 21:47:00,2046.8,9.6,-46.5,3.96,220.0,1.4
2018-05-10 22:07:00,2028.5,8.1,-46.82,4.41,264.0,0.7
2018-05-10 22:27:00,2020.5,4.8,-46.55,3.95,220.0,2.0
2018-05-10 22:47:00,2014.2,4.4,-46.63,3.8,286.0,1.7
2018-05-10 23:07:00,2022.5,6.0,-46.71,4.13,220.0,1.0
2018-05-10 23:26:00,2031.1,7.7,-46.2,4.2,308.0,1.0
2018-05-10 23:46:00,2037.1,9.0,-46.74,3.8,176.0,1.4
2018-05-11 00:07:00,2023.6,8.5,-46.63,3.97,220.0,1.7
2018-05-11 00:27:00,2016.1,7.8,-46.07,4.16,264.0,0.3
2018-05-11 00:47:00,2047.9,14.1,-45.81,3.89,88.0,0.7
2018-05-11 01:07:00,2061.3,5.4,-46.2,3.99,264.0,1.7
2018-05-11 01:27:00,2081.8,15.4,-45.85,3.85,176.0,1.0
2018-05-11 01:47:00,2295.6,65.3,-46.89,3.39,176.0,0.3
2018-05-11 02:06:00,2301.6,54.5,-46.53,3.53,0.0,1.7
2018-05-11 02:27:00,2246.3,14.8,-46.25,3.81,132.0,1.4
2018-05-11 02:46:00,2232.1,36.6,-46.82,3.61,132.0,0.7
2018-05-11 03:07:00,2209.2,49.6,-46.4,3.83,88.0,0.7
2018-05-11 03:27:00,2146.0,28.5,-45.87,4.05,176.0,2.0
2018-05-11 03:47:00,2168.5,73.7,-45.36,4.07,132.0,0.7
2018-05-11 04:07:00,2184.8,45.3,-45.93,3.87,176.0,2.0
2018-05-11 04:27:00,2173.9,49.3,-45.7,3.82,132.0,2.4
2018-05-11 04:47:00,2119.2,38.9,-46.01,3.87,132.0,2.0
2018-05-11 05:07:00,2094.6,10.8,-46.09,3.98,132.0,0.7
2018-05-11 05:27:00,2146.9,49.6,-45.63,4.13,132.0,1.4
2018-05-11 05:47:00,2095.2,21.9,-46.33,3.84,88.0,4.4
2018-05-11 06:06:00,2038.2,27.5,-46.66,4.21,176.0,4.1
2018-05-11 06:26:00,2050.2,36.1,-46.17,4.16,176.0,3.4
2018-05-11 06:42:00,2081.1,45.2,-45.77,3.9,176.0,3.7
2018-05-11 08:37:00,2066.8,53.9,-46.18,4.1,176.0,2.7
2018-05-11 08:57:00,2003.0,23.7,-46.87,4.02,88.0,5.1
2018-05-11 09:16:00,2008.7,33.4,-47.09,3.84,176.0,3.7
2018-05-11 09:37:00,2020.4,20.5,-46.3,3.97,176.0,3.1
2018-05-11 09:57:00,2020.1,31.6,-46.49,4.01,44.0,2.7
2018-05-11 10:16:00,2003.0,24.7,-46.86,3.89,132.0,3.1
2018-05-11 10:37:00,1978.6,9.7,-46.64,4.2,176.0,5.8
2018-05-11 10:53:00,1981.7,6.7,-46.92,4.04,132.0,5.1
2018-05-11 11:40:00,1995.1,29.1,-46.49,4.31,132.0,4.4
2018-05-11 12:00:00,1980.3,5.9,-47.07,4.32,198.0,2.4
2018-05-11 12:21:00,1997.6,25.8,-47.18,3.86,176.0,2.4
2018-05-11 12:41:00,1976.5,9.5,-47.13,4.17,154.0,5.1
2018-05-11 13:01:00,1980.3,16.9,-46.81,4.2,132.0,3.7
2018-05-11 13:16:00,1993.7,15.5,-46.88,4.07,176.0,6.8
2018-05-11 15:05:00,1999.0,6.0,-46.36,4.22,176.0,3.7
2018-05-11 16:23:00,2011.4,31.5,-47.18,3.84,176.0,2.7
2018-05-11 16:44:00,2065.1,39.0,-46.29,4.02,132.0,1.7
2018-05-11 17:04:00,2044.2,57.5,-46.62,4.06,132.0,2.7
2018-05-11 17:23:00,2102.5,76.4,-46.21,4.14,110.0,3.1
2018-05-11 17:43:00,2033.2,52.1,-46.49,4.33,88.0,1.7
2018-05-11 17:59:00,1992.1,15.7,-47.18,4.24,88.0,3.1
2018-05-11 19:53:00,2032.6,28.8,-46.68,3.82,110.0,2.4
2018-05-11 20:13:00,2028.4,5.4,-47.15,4.07,44.0,2.0
2018-05-11 20:34:00,2026.0,2.4,-47.11,3.81,88.0,3.4
2018-05-11 20:54:00,2026.2,16.8,-46.74,4.11,0.0,2.4
2018-05-11 21:13:00,2047.0,34.1,-46.54,4.15,176.0,3.7
2018-05-11 21:34:00,2101.8,44.3,-46.44,3.73,132.0,1.7
2018-05-11 21:53:00,2054.4,29.5,-46.7,4.12,176.0,2.0
2018-05-11 22:13:00,2058.5,16.3,-46.66,4.17,88.0,2.4
2018-05-11 22:33:00,2051.2,13.9,-46.44,4.05,264.0,2.7
2018-05-11 22:53:00,2053.6,24.6,-47.01,4.01,110.0,1.7
2018-05-11 23:14:00,2110.9,63.3,-46.18,3.86,176.0,2.0
2018-05-11 23:34:00,2065.1,13.4,-46.1,3.9,132.0,1.4
2018-05-11 23:53:00,2085.6,7.6,-46.4,3.82,308.0,1.4
2018-05-12 00:13:00,2074.8,7.2,-46.38,3.81,0.0,1.4
2018-05-12 00:33:00,2062.2,7.8,-46.75,3.84,264.0,1.0
2018-05-12 00:53:00,2056.8,6.6,-46.01,4.07,220.0,1.4
2018-05-12 01:14:00,2045.5,6.5,-46.01,3.77,220.0,1.0
2018-05-12 01:33:00,2047.6,6.5,-45.99,4.03,176.0,1.4
2018-05-12 01:53:00,2062.1,6.8,-46.13,3.99,132.0,1.7
2018-05-12 02:14:00,2063.7,5.3,-46.24,4.02,264.0,1.4
2018-05-12 02:33:00,2055.1,5.1,-46.26,3.83,264.0,1.0
2018-05-12 02:53:00,2059.4,3.8,-45.78,4.2,220.0,2.0
2018-05-12 03:13:00,2048.3,4.8,-46.17,3.96,220.0,1.4
2018-05-12 03:34:00,2055.0,4.4,-46.23,4.16,132.0,0.3
2018-05-12 03:54:00,2049.2,6.9,-46.31,3.91,220.0,1.0
2018-05-12 04:13:00,2056.4,7.8,-46.19,3.98,176.0,0.3
2018-05-12 04:34:00,2077.9,14.4,-46.24,3.64,176.0,1.0
2018-05-12 04:54:00,2086.4,11.6,-46.16,3.76,220.0,1.4
2018-05-12 05:13:00,2074.6,8.0,-45.97,4.15,220.0,1.4
2018-05-12 05:34:00,2086.3,14.0,-46.28,3.98,176.0,1.7
2018-05-12 05:54:00,2075.2,11.5,-46.02,4.0,176.0,2.0
2018-05-12 06:14:00,2038.2,11.8,-46.28,4.03,286.0,1.0
2018-05-12 06:29:00,2024.9,4.2,-46.63,3.76,264.0,1.4
2018-05-12 08:23:00,2012.6,5.0,-46.34,3.84,88.0,0.7
2018-05-12 08:43:00,2006.5,6.3,-46.52,4.08,220.0,2.0
2018-05-12 09:04:00,2010.4,4.5,-46.63,3.79,264.0,1.7
2018-05-12 09:24:00,2000.0,4.6,-46.67,4.31,308.0,0.7
2018-05-12 09:44:00,2006.0,3.8,-46.73,3.9,176.0,0.3
2018-05-12 10:04:00,2018.0,15.3,-46.5,4.32,176.0,1.0
2018-05-12 10:23:00,2026.2,26.1,-46.24,3.91,264.0,0.7
2018-05-12 10:43:00,1999.0,6.3,-46.48,3.89,132.0,1.4
2018-05-12 11:03:00,1996.0,5.1,-46.7,3.85,220.0,2.0
2018-05-12 11:24:00,1995.4,6.3,-45.94,4.03,220.0,0.7
2018-05-12 11:43:00,1990.5,5.7,-46.86,3.95,264.0,1.7
2018-05-12 12:04:00,1989.3,5.4,-46.54,4.05,132.0,1.0
2018-05-12 12:23:00,1989.2,5.7,-47.12,4.11,176.0,0.7
2018-05-12 12:43:00,2004.8,15.1,-46.43,4.2,0.0,0.7
2018-05-12 13:03:00,1991.0,4.7,-46.54,4.0,308.0,0.3
2018-05-12 13:23:00,2005.8,23.3,-46.24,3.95,308.0,1.0
2018-05-12 13:43:00,2044.9,21.1,-46.21,3.99,0.0,0.7
2018-05-12 14:03:00,2023.7,25.4,-46.46,4.25,132.0,0.7
2018-05-12 14:23:00,2016.0,7.8,-46.6,4.3,264.0,0.7
2018-05-12 14:43:00,2032.0,10.1,-46.04,4.09,220.0,0.3
2018-05-12 15:03:00,2059.6,5.9,-46.73,3.96,220.0,1.0
2018-05-12 15:24:00,2063.9,9.6,-46.53,4.0,220.0,0.3
2018-05-12 15:44:00,2003.5,13.4,-46.93,4.13,264.0,1.4
2018-05-12 16:03:00,2002.6,5.8,-46.41,3.95,264.0,0.3
2018-05-12 16:24:00,2006.1,6.7,-46.06,3.88,286.0,0.3
2018-05-12 16:44:00,2004.9,5.0,-46.37,4.09,176.0,1.7
2018-05-12 17:04:00,1984.2,7.8,-46.29,3.9,264.0,2.7
2018-05-12 17:23:00,1993.2,6.9,-46.13,4.17,308.0,1.0
2018-05-12 17:43:00,1990.2,19.2,-46.48,3.97,264.0,1.0
2018-05-12 17:59:00,2033.5,8.4,-47.09,3.62,308.0,0.7
2018-05-12 19:55:00,2040.6,7.5,-46.37,4.28,264.0,1.4
2018-05-12 20:15:00,2043.0,5.5,-46.14,4.3,176.0,1.0
2018-05-12 20:35:00,2035.5,8.3,-46.29,3.74,308.0,1.4
2018-05-12 20:55:00,2029.6,6.8,-45.99,4.36,0.0,1.7
2018-05-12 21:14:00,2066.7,24.8,-45.8,3.83,264.0,0.3
2018-05-12 21:35:00,2062.8,13.8,-46.04,3.86,264.0,1.0
2018-05-12 21:55:00,2031.1,10.0,-46.03,4.01,264.0,1.7
2018-05-12 22:15:00,2030.5,9.2,-45.97,4.19,264.0,0.7
2018-05-12 22:35:00,2040.1,10.1,-46.35,4.05,264.0,1.4
2018-05-12 22:55:00,2046.2,6.8,-46.07,3.82,264.0,1.7
2018-05-12 23:15:00,2094.3,11.5,-46.08,3.78,264.0,1.0
2018-05-12 23:34:00,2086.1,4.5,-46.21,3.84,242.0,1.0
2018-05-12 23:54:00,2096.6,5.4,-46.35,3.94,264.0,2.4
2018-05-13 00:14:00,2084.2,8.2,-46.27,3.84,264.0,2.0
2018-05-13 00:34:00,2078.2,3.0,-46.31,4.04,220.0,1.7
2018-05-13 00:54:00,2090.5,6.0,-46.62,3.84,264.0,1.0
2018-05-13 01:15:00,2105.0,7.8,-46.33,3.99,308.0,1.0
2018-05-13 01:34:00,2087.6,10.1,-46.67,3.71,0.0,1.0
2018-05-13 01:55:00,2061.9,12.8,-46.83,3.72,264.0,2.0
2018-05-13 02:15:00,2051.8,8.7,-46.87,4.09,0.0,2.4
2018-05-13 02:35:00,2077.1,18.7,-46.73,3.92,264.0,1.4
2018-05-13 02:55:00,2118.8,21.4,-46.48,3.84,330.0,0.7
2018-05-13 03:15:00,2129.5,14.7,-46.21,3.89,176.0,2.7
2018-05-13 03:34:00,2120.3,10.3,-46.6,3.65,308.0,1.4
2018-05-13 03:54:00,2143.8,3.8,-46.7,4.02,242.0,1.0
2018-05-13 04:14:00,2157.5,7.9,-46.77,3.71,308.0,1.0
2018-05-13 04:34:00,2175.2,3.4,-46.55,3.69,264.0,0.7
2018-05-13 04:55:00,2189.5,7.1,-46.55,3.83,0.0,0.7
2018-05-13 05:15:00,2202.4,4.7,-46.47,3.61,308.0,1.4
2018-05-13 05:34:00,2186.9,15.6,-46.27,3.59,264.0,1.4
2018-05-13 05:54:00,2174.2,7.9,-46.33,3.75,220.0,1.0
2018-05-13 06:15:00,2188.7,5.2,-46.74,3.6,308.0,0.7
2018-05-13 06:30:00,2196.4,10.9,-46.96,3.56,308.0,0.3
2018-05-13 08:25:00,2157.1,9.4,-46.55,3.77,308.0,0.7
2018-05-13 08:45:00,2119.3,11.6,-47.25,3.78,308.0,2.0
2018-05-13 09:05:00,2104.4,6.5,-47.15,4.01,264.0,2.0
2018-05-13 09:24:00,2096.1,8.6,-46.96,3.62,264.0,0.7
2018-05-13 09:44:00,2060.3,14.7,-47.01,3.78,264.0,1.4
2018-05-13 10:04:00,2037.3,5.5,-46.95,3.93,198.0,1.7
2018-05-13 10:24:00,2021.5,6.5,-47.28,4.18,88.0,1.0
2018-05-13 10:44:00,1997.7,7.6,-46.97,3.79,220.0,1.4
2018-05-13 11:04:00,2007.2,4.7,-47.53,3.92,308.0,1.4
2018-05-13 11:25:00,2013.2,5.9,-47.21,4.37,308.0,1.4
2018-05-13 11:45:00,2014.8,5.3,-47.23,3.86,264.0,1.0
2018-05-13 12:05:00,2015.1,4.2,-47.18,3.89,220.0,2.4
2018-05-13 12:24:00,2007.3,5.3,-47.17,4.02,176.0,1.7
2018-05-13 12:44:00,2006.9,3.5,-47.35,4.18,308.0,1.4
2018-05-13 13:05:00,2004.9,2.3,-46.99,3.91,308.0,1.0
2018-05-13 13:25:00,1994.3,8.3,-47.31,3.9,308.0,2.0
2018-05-13 13:45:00,1987.2,5.6,-47.09,3.91,308.0,1.4
2018-05-13 14:04:00,1983.4,3.4,-47.52,4.08,44.0,1.0
2018-05-13 14:24:00,1988.5,4.7,-47.06,3.95,308.0,2.0
2018-05-13 14:44:00,1996.3,4.4,-46.99,4.19,nan,nan
2018-05-13 15:04:00,1991.2,8.2,-47.34,4.07,308.0,1.7
2018-05-13 15:24:00,2002.7,4.2,-47.09,3.95,308.0,1.7
2018-05-13 15:44:00,1998.1,4.0,-47.31,4.27,nan,nan
2018-05-13 16:04:00,1998.2,3.5,-47.35,3.75,264.0,2.7
2018-05-13 16:24:00,2003.0,3.4,-47.17,4.03,264.0,1.7
2018-05-13 16:44:00,2003.8,2.9,-47.06,3.92,264.0,1.7
2018-05-13 17:05:00,2017.9,11.9,-47.4,4.03,220.0,1.4
2018-05-13 17:24:00,2037.6,12.9,-46.93,3.83,264.0,1.7
2018-05-13 17:45:00,2030.5,12.8,-47.25,4.12,0.0,2.4
2018-05-13 18:00:00,2029.2,9.1,-47.28,4.1,308.0,2.4
2018-05-13 19:55:00,2071.1,7.4,-47.0,3.65,264.0,1.0
2018-05-13 20:16:00,2090.1,7.2,-46.99,3.92,264.0,1.0
2018-05-13 20:36:00,2099.4,10.1,-46.5,3.89,22.0,1.4
2018-05-13 20:56:00,2104.9,11.7,-46.6,3.86,308.0,0.7
2018-05-13 21:16:00,2104.9,7.1,-46.3,3.99,44.0,0.7
2018-05-13 21:36:00,2148.7,32.4,-46.05,3.78,308.0,1.0
2018-05-13 21:56:00,2146.2,11.2,-46.24,3.81,308.0,0.7
2018-05-13 22:16:00,2198.0,23.4,-45.8,3.42,308.0,1.0
2018-05-13 22:36:00,2183.2,8.4,-46.1,3.84,308.0,0.7
2018-05-13 22:56:00,2215.5,19.5,-45.91,3.84,308.0,1.4
2018-05-13 23:15:00,2203.8,23.4,-45.87,4.07,308.0,1.7
2018-05-13 23:35:00,2180.6,5.7,-45.54,3.52,308.0,1.4
2018-05-13 23:56:00,2173.6,4.3,-45.84,3.5,308.0,1.4
2018-05-14 00:16:00,2174.8,11.9,-45.65,3.76,264.0,1.4
2018-05-14 00:35:00,2134.3,9.6,-46.13,3.81,286.0,1.4
2018-05-14 00:55:00,2110.6,6.6,-46.05,3.89,308.0,1.4
2018-05-14 01:15:00,2101.2,6.9,-46.5,4.14,308.0,0.7
2018-05-14 01:36:00,2080.2,7.2,-46.53,3.93,264.0,1.7
2018-05-14 01:56:00,2069.9,3.9,-45.99,3.98,286.0,1.7
2018-05-14 02:16:00,2058.1,6.0,-46.63,3.91,330.0,2.0
2018-05-14 02:36:00,2049.1,4.2,-46.75,3.76,132.0,1.7
2018-05-14 02:56:00,2043.1,2.9,-46.79,3.96,220.0,3.1
2018-05-14 03:16:00,2037.5,3.6,-46.48,4.17,264.0,2.7
2018-05-14 03:36:00,2029.5,6.6,-46.45,4.28,308.0,2.4
2018-05-14 03:56:00,2025.7,3.0,-47.34,4.05,308.0,2.4
2018-05-14 04:15:00,2028.0,2.8,-46.8,4.04,308.0,2.0
2018-05-14 04:36:00,2028.2,2.8,-46.91,3.94,308.0,2.0
2018-05-14 04:56:00,2035.0,2.8,-47.22,3.96,0.0,1.0
2018-05-14 05:15:00,2045.5,5.1,-46.92,4.04,0.0,1.4
2018-05-14 05:35:00,2053.5,8.1,-47.2,4.16,330.0,2.7
2018-05-14 05:55:00,2062.7,3.3,-47.28,4.1,nan,nan
2018-05-14 06:16:00,2052.2,5.4,-47.62,3.86,nan,nan
2018-05-14 06:31:00,2037.6,2.4,-47.86,3.79,176.0,1.0
2018-05-14 08:26:00,1997.6,10.8,-47.69,4.05,nan,nan
2018-05-14 08:46:00,1986.1,7.6,-47.3,4.23,88.0,2.4
2018-05-14 09:05:00,1974.5,2.9,-47.16,4.26,nan,nan
2018-05-14 09:26:00,1975.9,4.1,-47.64,3.97,nan,nan
2018-05-14 09:46:00,1968.6,3.9,-47.18,4.53,nan,nan
2018-05-14 10:06:00,1967.1,3.5,-47.5,4.07,nan,nan
2018-05-14 10:26:00,1970.6,3.9,-47.67,3.93,88.0,2.0
2018-05-14 10:46:00,1968.8,3.3,-47.44,4.31,nan,nan
2018-05-14 11:05:00,1968.1,4.5,-47.56,3.92,nan,nan
2018-05-14 11:25:00,1968.5,7.0,-47.38,4.07,nan,nan
2018-05-14 11:45:00,1968.0,2.9,-47.69,4.08,nan,nan
2018-05-14 12:06:00,1969.7,2.7,-47.76,4.1,308.0,2.4
2018-05-14 12:26:00,1975.3,3.9,-47.23,3.96,264.0,3.1
2018-05-14 12:45:00,1972.9,4.3,-47.25,3.95,264.0,3.4
2018-05-14 13:05:00,1980.2,2.8,-47.58,4.09,0.0,2.4
2018-05-14 13:25:00,1984.1,5.1,-47.09,4.28,nan,nan
2018-05-14 13:46:00,1991.0,4.0,-46.88,4.17,nan,nan
2018-05-14 14:03:00,1986.3,3.5,-47.22,4.2,176.0,5.8
2018-05-14 17:38:00,1972.4,3.4,-46.87,4.1,264.0,5.8
2018-05-14 17:58:00,1974.3,2.3,-48.05,4.04,330.0,3.4
2018-05-14 18:18:00,1980.2,3.7,-48.07,4.08,88.0,2.4
2018-05-14 18:38:00,1984.1,4.0,-48.09,4.27,0.0,1.7
2018-05-14 18:58:00,1984.1,5.1,-47.45,3.77,176.0,2.0
2018-05-14 19:13:00,1974.1,3.0,-48.35,4.28,0.0,4.8
2018-05-14 21:07:00,1993.6,4.5,-47.1,4.18,88.0,2.4
2018-05-14 21:27:00,1999.9,8.3,-47.64,4.25,308.0,1.4
2018-05-14 21:48:00,2001.4,4.3,-47.23,4.11,88.0,1.0
2018-05-14 22:08:00,2001.8,3.3,-47.23,4.2,308.0,1.7
2018-05-14 22:28:00,1999.2,3.0,-47.33,4.21,88.0,1.0
2018-05-14 22:48:00,1995.2,3.5,-47.56,3.91,264.0,3.4
2018-05-14 23:08:00,2005.9,6.5,-47.23,3.89,308.0,1.7
2018-05-14 23:27:00,2008.4,6.3,-47.2,4.13,308.0,0.7
2018-05-14 23:47:00,2011.9,7.4,-47.48,4.19,308.0,1.7
2018-05-15 00:08:00,2005.6,5.0,-46.98,4.1,264.0,1.4
2018-05-15 00:28:00,2009.4,6.8,-47.03,4.24,330.0,1.7
2018-05-15 00:47:00,2013.1,5.5,-47.09,3.88,264.0,1.4
2018-05-15 01:08:00,2011.5,4.9,-47.25,3.98,264.0,1.4
2018-05-15 01:28:00,2022.8,5.9,-46.9,3.92,308.0,1.0
2018-05-15 01:48:00,2026.5,6.3,-46.94,3.93,308.0,1.4
2018-05-15 02:08:00,2024.6,6.1,-47.14,4.09,264.0,0.7
2018-05-15 02:28:00,2020.6,5.2,-47.0,4.13,0.0,1.7
2018-05-15 02:47:00,2018.5,5.7,-46.95,3.71,0.0,1.0
2018-05-15 03:07:00,2022.9,5.2,-47.04,4.25,264.0,1.7
2018-05-15 03:27:00,2025.3,5.6,-47.42,4.0,308.0,0.7
2018-05-15 03:48:00,2039.4,12.4,-47.48,3.75,308.0,1.0
2018-05-15 04:08:00,2045.7,9.6,-47.09,3.93,264.0,1.0
2018-05-15 04:27:00,2100.0,30.4,-47.1,3.79,308.0,0.3
2018-05-15 04:47:00,2053.0,16.9,-46.78,3.89,308.0,2.0
2018-05-15 05:08:00,2036.8,8.7,-47.05,4.15,330.0,1.7
2018-05-15 05:28:00,2037.4,8.6,-47.0,4.12,330.0,1.0
2018-05-15 05:48:00,2026.2,5.7,-47.29,4.12,0.0,2.4
2018-05-15 06:07:00,2022.8,4.9,-46.94,4.24,0.0,2.0
2018-05-15 06:28:00,2014.6,5.9,-46.85,3.97,308.0,1.7
2018-05-15 06:48:00,2014.2,4.5,-47.16,4.15,308.0,0.7
2018-05-15 07:07:00,2002.7,5.9,-46.87,4.06,286.0,2.4
2018-05-15 07:28:00,2004.1,4.3,-47.02,4.13,264.0,2.0
2018-05-15 07:43:00,1999.7,2.4,-47.27,4.16,308.0,1.7
2018-05-15 09:37:00,1997.1,2.5,-47.04,4.06,0.0,3.7
2018-05-15 09:58:00,1996.4,2.4,-46.92,4.18,132.0,1.4
2018-05-15 10:18:00,1997.5,3.2,-47.09,4.36,44.0,1.7
2018-05-15 10:38:00,1994.0,2.9,-47.07,4.13,308.0,3.7
2018-05-15 10:58:00,1991.0,2.8,-46.82,3.98,308.0,2.4
2018-05-15 11:18:00,1991.9,3.3,-46.66,4.08,132.0,3.1
2018-05-15 11:38:00,1992.7,3.0,-46.62,4.43,264.0,1.4
2018-05-15 11:57:00,1987.3,1.8,-46.5,4.14,308.0,3.1
2018-05-15 12:17:00,1987.3,2.5,-46.06,4.04,110.0,4.1
2018-05-15 12:37:00,1992.9,3.7,-46.79,4.15,0.0,2.0
2018-05-15 12:58:00,1993.0,4.4,-46.16,4.09,110.0,2.4
2018-05-15 13:18:00,1998.7,4.6,-46.32,4.24,0.0,2.0
2018-05-15 13:38:00,1998.4,3.6,-46.43,4.25,0.0,2.4
2018-05-15 13:57:00,1999.3,2.9,-46.3,4.5,308.0,3.1
2018-05-15 14:17:00,1992.9,3.8,-45.88,4.28,264.0,4.1
2018-05-15 14:38:00,1988.6,7.3,-46.0,4.3,264.0,2.7
2018-05-15 14:58:00,1979.8,2.9,-46.15,4.47,0.0,3.4
2018-05-15 15:17:00,1985.2,8.8,-46.03,4.19,0.0,2.4
2018-05-15 15:37:00,1982.5,3.3,-46.39,4.21,88.0,2.4
2018-05-15 15:49:00,1985.6,1.7,-45.92,3.51,0.0,2.7
2018-05-15 17:01:00,1978.4,2.4,-46.04,4.17,308.0,2.7
2018-05-15 17:21:00,1975.2,1.8,-45.96,4.51,330.0,4.4
2018-05-15 17:42:00,1985.0,5.5,-45.92,4.32,220.0,2.4
2018-05-15 18:01:00,1988.8,4.4,-45.84,3.99,330.0,1.0
2018-05-15 18:21:00,1983.6,4.6,-46.08,4.32,44.0,1.7
2018-05-15 18:37:00,1978.5,2.4,-45.43,3.91,44.0,2.7
2018-05-15 20:32:00,1986.4,6.7,-45.65,4.26,308.0,1.0
2018-05-15 20:51:00,1991.2,4.3,-46.03,4.32,88.0,1.7
2018-05-15 21:11:00,2005.3,4.4,-45.95,4.15,220.0,1.4
2018-05-15 21:32:00,2011.8,5.7,-45.87,4.5,0.0,2.0
2018-05-15 21:51:00,2012.5,6.0,-45.73,4.05,220.0,1.7
2018-05-15 22:12:00,2012.8,9.0,-46.4,4.44,0.0,1.0
2018-05-15 22:32:00,1997.8,2.6,-45.93,4.21,0.0,1.0
2018-05-15 22:52:00,1995.0,1.7,-45.76,4.18,132.0,1.4
2018-05-15 23:12:00,2000.2,3.7,-46.02,3.99,0.0,1.0
2018-05-15 23:32:00,2009.3,8.1,-46.17,4.33,308.0,1.0
2018-05-15 23:51:00,2003.7,5.2,-46.38,4.04,0.0,0.7
2018-05-16 00:11:00,2020.3,5.2,-46.13,4.17,0.0,1.4
2018-05-16 00:32:00,2026.0,5.8,-46.51,3.92,264.0,1.4
2018-05-16 00:52:00,2019.5,4.0,-46.21,4.4,0.0,1.0
2018-05-16 01:11:00,2030.8,4.6,-45.84,3.92,0.0,1.7
2018-05-16 01:32:00,2023.5,3.2,-46.1,3.88,88.0,1.0
2018-05-16 01:52:00,2010.6,8.3,-46.21,4.37,220.0,2.0
2018-05-16 02:11:00,2023.9,10.2,-46.6,3.81,220.0,2.0
2018-05-16 02:32:00,2026.3,5.5,-46.64,4.28,88.0,1.4
2018-05-16 02:52:00,2023.3,9.6,-46.76,4.05,0.0,1.0
2018-05-16 03:12:00,2028.5,6.7,-46.68,4.26,308.0,1.7
2018-05-16 03:31:00,2017.1,4.1,-46.65,4.05,220.0,0.7
2018-05-16 03:51:00,2021.6,6.2,-46.55,4.38,264.0,1.4
2018-05-16 04:12:00,2010.1,4.1,-46.49,4.12,44.0,1.4
2018-05-16 04:31:00,2003.4,4.9,-46.79,4.06,44.0,1.7
2018-05-16 04:51:00,2007.0,5.0,-46.34,4.18,264.0,3.1
2018-05-16 05:12:00,1990.0,3.3,-47.2,4.11,0.0,3.1
2018-05-16 05:32:00,1992.2,3.3,-46.68,4.25,22.0,2.4
2018-05-16 05:51:00,1989.3,1.9,-46.93,4.21,44.0,2.0
2018-05-16 06:11:00,1989.6,3.0,-47.27,4.04,44.0,5.1
2018-05-16 06:31:00,1990.5,2.1,-46.49,3.95,308.0,1.0
2018-05-16 06:52:00,1988.7,1.4,-47.21,4.09,0.0,2.0
2018-05-16 07:07:00,1993.4,2.1,-47.44,4.21,88.0,2.4
2018-05-16 09:01:00,1968.1,4.1,-46.09,4.42,0.0,3.4
2018-05-16 09:21:00,1963.9,4.9,-46.38,4.36,264.0,3.4
2018-05-16 09:41:00,1968.5,3.8,-46.3,4.61,308.0,3.4
2018-05-16 10:02:00,1967.5,4.3,-45.96,4.43,44.0,2.4
2018-05-16 10:22:00,1955.4,5.4,-45.89,4.02,88.0,4.4
2018-05-16 10:42:00,1951.3,4.9,-45.63,4.37,132.0,3.7
2018-05-16 11:02:00,1957.8,3.9,-45.85,4.18,308.0,1.4
2018-05-16 11:21:00,1958.5,5.1,-45.82,4.12,308.0,2.7
2018-05-16 11:41:00,1953.0,4.1,-45.81,4.44,44.0,4.8
2018-05-16 12:01:00,1956.2,4.4,-46.15,4.19,0.0,2.4
2018-05-16 12:21:00,1953.8,2.1,-45.83,4.28,88.0,4.4
2018-05-16 12:41:00,1958.7,6.0,-46.21,4.17,0.0,4.4
2018-05-16 13:01:00,1957.0,4.0,-46.22,4.4,330.0,5.4
2018-05-16 13:21:00,1950.1,5.5,-45.92,4.48,44.0,4.1
2018-05-16 13:41:00,1956.5,4.6,-45.56,4.19,308.0,3.4
2018-05-16 14:01:00,1957.2,4.6,-45.59,4.1,330.0,3.4
2018-05-16 14:22:00,1956.1,5.2,-46.2,3.72,0.0,4.1
2018-05-16 14:33:00,1950.6,0.6,-45.58,4.72,308.0,2.4
2018-05-16 15:01:00,1962.2,5.0,-45.81,4.71,286.0,3.4
2018-05-16 16:16:00,1956.0,4.8,-46.33,4.14,286.0,5.1
2018-05-16 16:35:00,1948.8,2.5,-46.19,4.18,0.0,6.1
2018-05-16 16:55:00,1948.8,2.9,-46.32,4.66,176.0,3.1
2018-05-16 17:16:00,1957.3,8.4,-46.07,4.19,88.0,4.8
2018-05-16 17:36:00,1957.2,3.7,-46.41,4.06,286.0,3.4
2018-05-16 17:50:00,1963.7,2.1,-45.65,4.6,0.0,4.1
2018-05-16 19:45:00,1958.0,3.3,-46.85,4.27,44.0,3.1
2018-05-16 20:06:00,1957.0,2.5,-46.45,4.2,0.0,2.0
2018-05-16 20:25:00,1958.0,2.3,-46.33,4.1,132.0,1.7
2018-05-16 20:45:00,1961.5,6.0,-46.34,3.99,44.0,2.0
2018-05-16 21:05:00,1962.1,1.8,-46.18,4.14,88.0,1.7
2018-05-16 21:26:00,1961.6,2.9,-46.7,4.13,154.0,4.4
2018-05-16 21:46:00,1960.0,1.7,-46.52,4.32,88.0,3.7
2018-05-16 22:05:00,1960.0,2.5,-46.48,3.96,132.0,2.7
2018-05-16 22:25:00,1955.8,2.8,-46.41,4.03,44.0,1.4
2018-05-16 22:46:00,1956.5,1.8,-46.32,3.95,88.0,4.1
2018-05-16 23:06:00,1953.5,2.6,-46.34,4.22,0.0,3.1
2018-05-16 23:25:00,1960.0,4.3,-46.93,4.07,44.0,1.4
2018-05-16 23:45:00,1960.5,2.8,-46.48,4.22,88.0,0.7
2018-05-17 00:06:00,1962.0,2.2,-47.01,4.28,88.0,2.0
2018-05-17 00:26:00,1960.5,3.6,-46.89,4.0,44.0,3.1
2018-05-17 00:45:00,1964.1,2.7,-46.61,4.45,132.0,2.0
2018-05-17 01:06:00,1966.1,3.1,-46.19,4.2,176.0,2.0
2018-05-17 01:26:00,1969.3,3.2,-46.55,4.07,44.0,2.7
2018-05-17 01:45:00,1969.2,3.0,-46.19,4.21,132.0,0.7
2018-05-17 02:06:00,1967.6,2.2,-46.7,4.48,44.0,1.4
2018-05-17 02:26:00,1974.7,6.2,-46.73,4.11,110.0,0.7
2018-05-17 02:45:00,1968.7,3.0,-46.77,4.45,264.0,0.7
2018-05-17 03:06:00,1970.0,3.4,-47.09,4.17,132.0,2.4
2018-05-17 03:26:00,1979.6,3.7,-46.53,4.17,44.0,2.7
2018-05-17 03:45:00,1977.4,1.8,-46.86,4.09,44.0,2.7
2018-05-17 04:06:00,1975.9,3.4,-46.7,4.13,88.0,3.7
2018-05-17 04:26:00,1976.1,2.5,-47.14,4.08,44.0,3.1
2018-05-17 04:45:00,1981.9,3.0,-47.06,4.32,132.0,1.7
2018-05-17 05:05:00,1979.0,1.9,-47.34,4.03,0.0,3.4
2018-05-17 05:26:00,1985.8,14.3,-47.01,4.21,264.0,4.1
2018-05-17 05:46:00,1980.9,5.7,-46.96,4.04,88.0,3.1
2018-05-17 06:05:00,1978.2,3.5,-46.56,4.04,88.0,3.4
2018-05-17 06:21:00,1973.2,1.4,-47.24,4.04,88.0,3.1
2018-05-17 08:15:00,1968.9,6.0,-46.71,4.13,88.0,3.4
2018-05-17 08:35:00,1963.3,5.4,-46.67,3.98,0.0,3.4
2018-05-17 08:55:00,1972.0,21.9,-46.44,4.12,0.0,2.0
2018-05-17 09:15:00,1975.9,20.1,-47.02,4.24,88.0,4.4
2018-05-17 09:35:00,1972.6,19.8,-46.79,4.13,286.0,4.8
2018-05-17 09:55:00,1978.1,30.3,-46.56,4.09,88.0,3.4
2018-05-17 11:27:00,1972.3,7.1,-46.94,4.28,88.0,3.7
2018-05-17 11:47:00,1989.6,34.3,-46.88,3.96,242.0,2.0
2018-05-17 12:07:00,1992.1,33.8,-46.7,3.83,308.0,3.4
2018-05-17 12:27:00,1987.7,49.4,-46.72,4.26,88.0,5.4
2018-05-17 12:47:00,1996.7,56.3,-45.91,4.16,308.0,3.1
2018-05-17 13:02:00,1954.4,3.1,-46.23,4.13,330.0,3.7
2018-05-17 14:09:00,2010.8,108.3,-46.23,4.02,308.0,3.4
2018-05-17 14:30:00,1956.6,12.1,-46.89,4.34,308.0,2.0
2018-05-17 14:50:00,1956.6,5.0,-47.04,4.02,286.0,4.8
2018-05-17 15:10:00,1961.2,15.6,-47.0,4.2,0.0,2.7
2018-05-17 15:30:00,1963.8,45.9,-47.21,4.34,88.0,3.1
2018-05-17 15:44:00,1954.8,3.0,-47.35,3.95,88.0,2.0
2018-05-17 17:39:00,1962.2,6.1,-46.81,4.2,0.0,2.0
2018-05-17 18:00:00,1974.4,25.1,-46.52,4.16,330.0,1.7
2018-05-17 18:20:00,1977.2,21.3,-46.47,4.0,286.0,1.4
2018-05-17 18:40:00,1968.4,15.1,-46.74,4.19,88.0,2.4
2018-05-17 18:59:00,1960.5,4.0,-46.31,4.28,308.0,3.1
2018-05-17 19:19:00,1961.9,2.0,-46.57,4.04,0.0,2.7
2018-05-17 19:39:00,1966.0,3.2,-46.31,4.13,44.0,3.1
2018-05-17 19:59:00,1994.3,24.7,-46.31,4.07,44.0,2.7
2018-05-17 20:20:00,2070.3,53.0,-45.9,4.15,44.0,3.4
2018-05-17 20:40:00,2082.0,44.2,-46.29,3.88,132.0,2.4
2018-05-17 21:00:00,2077.1,86.4,-46.15,4.1,88.0,3.4
2018-05-17 21:20:00,2103.4,115.6,-45.47,3.72,88.0,3.1
2018-05-17 21:40:00,2001.2,30.6,-45.97,4.05,44.0,1.4
2018-05-17 21:59:00,1994.4,36.0,-46.12,4.07,44.0,3.4
2018-05-17 22:19:00,1964.4,4.2,-46.16,4.39,0.0,2.4
2018-05-17 22:39:00,1990.3,33.0,-46.06,4.27,88.0,2.0
2018-05-17 22:59:00,2041.1,64.9,-46.08,3.85,44.0,3.4
2018-05-17 23:19:00,2012.6,39.3,-45.75,3.97,0.0,3.1
2018-05-17 23:39:00,1996.3,27.9,-46.08,4.22,44.0,3.7
2018-05-18 00:00:00,2000.9,52.0,-46.35,3.81,44.0,1.4
2018-05-18 00:20:00,2011.6,49.0,-46.23,4.03,44.0,2.4
2018-05-18 00:40:00,2003.3,27.8,-46.36,4.05,88.0,1.0
2018-05-18 01:00:00,2002.5,37.9,-46.36,4.21,44.0,1.7
2018-05-18 01:19:00,1981.5,5.5,-46.47,4.34,0.0,1.0
2018-05-18 01:39:00,1985.2,6.2,-46.39,4.26,132.0,1.4
2018-05-18 02:00:00,1993.1,11.6,-46.1,4.21,308.0,0.7
2018-05-18 02:20:00,2003.5,4.0,-46.25,4.22,44.0,1.4
2018-05-18 02:40:00,2004.4,5.4,-46.45,4.22,264.0,0.3
2018-05-18 03:00:00,2036.9,10.6,-46.6,3.94,308.0,0.3
2018-05-18 03:19:00,2083.2,17.6,-46.53,3.91,220.0,0.7
2018-05-18 03:39:00,2092.1,12.2,-46.71,4.04,88.0,0.7
2018-05-18 03:59:00,2049.4,8.8,-46.43,4.12,88.0,0.7
2018-05-18 04:15:00,2038.6,3.8,-46.49,4.01,44.0,0.7
2018-05-18 06:10:00,2007.1,2.1,-46.53,4.16,44.0,1.0
2018-05-18 06:30:00,2029.4,23.5,-46.69,4.35,308.0,1.0
2018-05-18 06:50:00,2084.5,67.8,-46.4,4.07,0.0,2.0
2018-05-18 07:10:00,1986.7,7.1,-46.87,4.08,88.0,2.0
2018-05-18 07:30:00,1979.0,2.8,-46.4,3.88,132.0,1.7
2018-05-18 07:50:00,1988.3,6.0,-46.67,4.03,286.0,2.0
2018-05-18 08:09:00,2003.9,23.8,-46.33,4.15,198.0,0.7
2018-05-18 08:29:00,1985.1,7.1,-46.6,4.32,88.0,3.1
2018-05-18 08:49:00,1998.9,33.0,-46.58,4.18,132.0,0.3
2018-05-18 09:09:00,2003.4,32.9,-46.26,4.22,286.0,3.1
2018-05-18 09:29:00,2005.0,25.9,-46.86,4.02,132.0,2.0
2018-05-18 09:49:00,1995.0,9.4,-46.64,4.0,0.0,1.4
2018-05-18 10:10:00,1993.6,11.3,-46.41,3.9,286.0,1.0
2018-05-18 10:21:00,2000.8,13.9,-46.53,3.93,88.0,1.4
2018-05-18 13:55:00,1985.7,29.7,-46.52,3.86,308.0,1.4
2018-05-18 14:15:00,2038.4,82.5,-46.83,3.98,0.0,2.4
2018-05-18 14:28:00,1981.6,23.6,-47.23,4.29,264.0,2.0
2018-05-18 16:22:00,1995.6,25.3,-47.28,4.07,88.0,2.7
2018-05-18 16:42:00,1977.3,22.8,-47.24,4.14,88.0,1.0
2018-05-18 17:03:00,1965.5,14.3,-47.13,4.19,44.0,1.4
2018-05-18 17:22:00,1962.0,2.0,-47.45,4.38,0.0,2.0
2018-05-18 17:42:00,1962.3,7.3,-47.36,4.19,330.0,1.0
2018-05-18 17:58:00,1965.8,6.0,-47.75,4.12,286.0,2.7
2018-05-18 19:53:00,1977.2,7.0,-47.43,4.09,0.0,1.4
2018-05-18 20:13:00,1993.8,4.6,-47.23,4.21,0.0,1.4
2018-05-18 20:33:00,2094.8,70.7,-46.46,3.86,88.0,1.7
2018-05-18 20:53:00,2116.9,22.9,-47.21,4.05,132.0,3.1
2018-05-18 21:13:00,2069.6,3.9,-46.76,4.07,132.0,2.0
2018-05-18 21:33:00,2060.2,11.1,-46.63,4.08,132.0,2.0
2018-05-18 21:52:00,2030.6,10.4,-46.27,4.15,88.0,1.4
2018-05-18 22:12:00,2023.8,7.9,-46.29,3.9,132.0,1.4
2018-05-18 22:32:00,2013.3,11.2,-46.05,4.06,0.0,2.4
2018-05-18 22:53:00,2011.5,5.6,-46.05,4.15,132.0,3.1
2018-05-18 23:13:00,2030.3,8.6,-45.94,3.93,132.0,1.0
2018-05-18 23:33:00,2014.9,3.4,-46.21,4.19,132.0,1.4
2018-05-18 23:53:00,2024.4,8.5,-46.2,4.3,88.0,1.4
2018-05-19 00:13:00,2103.0,27.5,-45.61,3.86,176.0,1.0
2018-05-19 00:32:00,2097.7,18.4,-45.57,4.03,0.0,1.0
2018-05-19 00:52:00,2115.2,10.2,-45.75,3.77,88.0,0.3
2018-05-19 01:12:00,2110.6,7.2,-45.71,4.21,220.0,1.0
2018-05-19 01:32:00,2134.1,22.0,-45.44,3.68,0.0,0.0
2018-05-19 01:53:00,2156.9,15.6,-45.44,3.58,44.0,0.0
2018-05-19 02:13:00,2186.3,18.3,-45.24,3.8,264.0,1.0
2018-05-19 02:33:00,2239.7,37.5,-45.86,3.76,308.0,0.3
2018-05-19 02:53:00,2295.1,13.9,-45.81,3.28,264.0,0.3
2018-05-19 03:12:00,2262.0,6.3,-45.61,3.72,308.0,0.7
2018-05-19 03:32:00,2280.1,16.2,-45.12,4.07,264.0,0.3
2018-05-19 03:53:00,2291.3,13.9,-45.38,3.29,220.0,0.3
2018-05-19 04:13:00,2315.3,12.6,-45.4,3.43,308.0,0.3
2018-05-19 04:32:00,2377.2,27.0,-45.27,3.44,220.0,0.7
2018-05-19 04:52:00,2449.1,9.4,-45.11,3.19,264.0,0.7
2018-05-19 05:13:00,2500.7,19.0,-44.88,3.12,0.0,0.7
2018-05-19 05:33:00,2539.3,11.7,-44.81,3.23,264.0,0.3
2018-05-19 05:53:00,2493.3,44.5,-44.82,3.46,88.0,0.0
2018-05-19 06:13:00,2415.1,35.7,-44.59,3.41,88.0,0.3
2018-05-19 06:28:00,2379.2,35.4,-44.95,3.48,264.0,1.0
2018-05-19 08:23:00,2066.1,21.9,-45.46,4.14,nan,2.4
2018-05-19 08:42:00,2046.9,7.1,-45.56,4.13,88.0,2.4
2018-05-19 09:03:00,2038.0,8.9,-45.65,4.07,154.0,1.4
2018-05-19 09:23:00,2039.1,39.9,-45.56,4.32,88.0,0.7
2018-05-19 09:42:00,2041.4,38.4,-46.03,4.21,264.0,1.0
2018-05-19 10:03:00,2052.5,34.1,-45.95,3.98,176.0,2.0
2018-05-19 10:23:00,2030.4,42.2,-45.66,3.93,264.0,2.7
2018-05-19 10:42:00,1994.0,14.8,-46.0,4.04,264.0,1.7
2018-05-19 11:02:00,1996.8,19.2,-46.03,4.1,308.0,1.4
2018-05-19 11:23:00,2004.3,25.8,-45.79,4.25,0.0,2.4
2018-05-19 11:43:00,2001.1,14.0,-45.69,4.25,132.0,1.0
2018-05-19 12:02:00,2007.0,20.1,-46.31,3.92,0.0,1.0
2018-05-19 12:23:00,1992.6,15.6,-45.89,4.1,176.0,2.0
2018-05-19 12:42:00,1990.9,14.3,-45.91,4.21,132.0,1.7
2018-05-19 13:02:00,2006.9,44.0,-45.88,4.4,308.0,4.4
2018-05-19 13:23:00,2011.6,54.3,-46.22,4.34,308.0,1.4
2018-05-19 13:43:00,1968.7,6.9,-46.04,3.96,88.0,1.7
2018-05-19 14:02:00,1984.5,18.1,-46.07,4.14,132.0,2.7
2018-05-19 14:23:00,1984.6,23.1,-46.03,4.02,0.0,1.0
2018-05-19 14:42:00,1972.4,8.1,-45.79,4.15,0.0,3.4
2018-05-19 15:02:00,1964.1,5.6,-46.08,4.04,132.0,2.4
2018-05-19 15:23:00,2012.5,41.5,-45.74,4.21,132.0,0.3
2018-05-19 15:43:00,1991.9,47.0,-46.28,4.1,88.0,2.4
2018-05-19 16:02:00,1978.2,17.2,-46.14,4.07,0.0,2.0
2018-05-19 16:23:00,1985.0,28.3,-46.42,4.09,198.0,1.7
2018-05-19 16:42:00,2019.0,39.4,-46.17,4.07,308.0,1.7
2018-05-19 17:02:00,2080.6,76.0,-45.91,3.86,286.0,3.4
2018-05-19 17:23:00,2031.1,37.2,-45.9,3.99,286.0,3.1
2018-05-19 17:42:00,2041.0,39.9,-45.59,4.01,88.0,3.1
2018-05-19 17:58:00,2023.5,26.2,-45.86,3.92,88.0,4.4
2018-05-19 19:54:00,1989.0,5.4,-45.72,4.11,44.0,2.4
2018-05-19 20:14:00,1995.8,5.6,-45.81,4.21,132.0,2.7
2018-05-19 20:34:00,1982.2,10.8,-45.59,3.85,88.0,3.1
2018-05-19 20:54:00,1992.4,11.4,-45.52,4.21,44.0,1.4
2018-05-19 21:14:00,1995.8,6.6,-45.4,4.11,132.0,3.1
2018-05-19 21:34:00,2003.6,2.4,-45.28,4.05,132.0,2.7
2018-05-19 21:54:00,2005.1,4.6,-45.2,4.3,88.0,3.1
2018-05-19 22:14:00,2019.8,4.8,-45.16,4.07,132.0,1.0
2018-05-19 22:33:00,2032.9,4.4,-45.0,4.19,88.0,2.0
2018-05-19 22:54:00,2051.1,6.6,-45.23,4.53,44.0,2.4
2018-05-19 23:14:00,2022.9,17.3,-45.15,3.94,88.0,2.0
2018-05-19 23:34:00,2031.9,6.2,-44.99,4.04,44.0,2.7
2018-05-19 23:53:00,2078.9,49.9,-45.11,4.0,220.0,0.7
2018-05-20 00:14:00,2153.6,48.8,-44.69,3.71,176.0,2.0
2018-05-20 00:33:00,2139.7,9.3,-44.88,3.88,176.0,1.0
2018-05-20 00:53:00,2142.8,5.6,-45.55,3.86,220.0,1.4
2018-05-20 01:14:00,2186.7,16.9,-45.7,3.88,154.0,0.7
2018-05-20 01:33:00,2171.7,18.8,-45.66,4.04,176.0,0.7
2018-05-20 01:54:00,2175.3,10.6,-45.65,3.98,44.0,0.3
2018-05-20 02:14:00,2196.9,22.1,-45.32,3.66,176.0,1.0
2018-05-20 02:34:00,2155.3,17.3,-45.59,3.52,132.0,0.3
2018-05-20 02:53:00,2131.3,17.3,-45.56,4.03,176.0,0.0
2018-05-20 03:14:00,2165.3,15.9,-45.38,4.04,220.0,0.3
2018-05-20 03:34:00,2210.3,22.3,-45.11,3.9,220.0,0.0
2018-05-20 03:54:00,2283.0,26.8,-44.83,3.66,220.0,0.0
2018-05-20 04:14:00,2295.4,26.6,-45.02,3.72,0.0,0.3
2018-05-20 04:34:00,2267.7,14.0,-45.05,3.99,264.0,0.0
2018-05-20 04:54:00,2239.4,23.2,-44.96,3.62,264.0,0.3
2018-05-20 05:13:00,2288.6,29.3,-45.09,3.53,264.0,0.3
2018-05-20 05:33:00,2202.2,13.2,-44.77,3.86,286.0,1.0
2018-05-20 05:53:00,2229.9,27.6,-45.09,3.55,264.0,1.0
2018-05-20 06:13:00,2404.5,88.4,-45.53,3.56,330.0,0.7
2018-05-20 06:29:00,2513.0,11.3,-45.67,3.29,110.0,0.3
2018-05-20 08:24:00,2360.1,42.7,-46.6,3.62,88.0,2.7
2018-05-20 08:43:00,2249.1,16.9,-46.35,3.81,132.0,2.4
2018-05-20 09:04:00,2217.3,41.4,-46.03,3.67,132.0,1.7
2018-05-20 09:24:00,2130.8,39.2,-45.66,4.18,132.0,2.4
2018-05-20 09:43:00,2149.6,51.6,-45.72,4.09,132.0,2.4
2018-05-20 10:03:00,2091.3,37.4,-45.74,3.89,110.0,1.4
2018-05-20 10:24:00,2096.6,68.0,-46.01,3.97,88.0,1.0
2018-05-20 10:44:00,2049.4,58.9,-45.48,4.11,220.0,3.1
2018-05-20 11:04:00,2010.3,9.9,-45.12,4.15,308.0,4.1
2018-05-20 11:24:00,2007.1,46.5,-45.63,4.22,88.0,3.1
2018-05-20 11:43:00,2016.2,29.9,-45.64,4.29,132.0,2.0
2018-05-20 12:04:00,2037.5,86.0,-45.3,4.2,88.0,3.1
2018-05-20 12:24:00,1980.7,9.0,-45.58,4.17,88.0,2.7
2018-05-20 12:43:00,2015.9,50.4,-45.62,4.37,88.0,3.1
2018-05-20 13:03:00,2055.4,57.6,-45.33,3.99,0.0,1.7
2018-05-20 13:23:00,2031.1,47.1,-44.73,3.96,110.0,1.0
2018-05-20 13:43:00,2025.5,55.0,-45.55,3.99,220.0,4.1
2018-05-20 14:03:00,2044.2,74.6,-44.97,3.97,264.0,3.7
2018-05-20 14:23:00,1991.9,41.5,-45.84,4.42,132.0,3.7
2018-05-20 14:43:00,2027.0,37.2,-45.56,3.97,88.0,2.4
2018-05-20 15:03:00,2029.5,52.7,-45.59,4.18,44.0,2.7
2018-05-20 15:24:00,1996.0,64.9,-45.89,4.46,154.0,3.7
2018-05-20 15:44:00,1986.8,47.2,-45.81,4.08,88.0,3.1
2018-05-20 16:03:00,2029.7,59.6,-46.04,4.18,88.0,3.1
2018-05-20 16:24:00,1996.2,46.2,-46.34,4.13,88.0,3.4
2018-05-20 16:44:00,2008.9,34.5,-46.09,4.42,308.0,3.1
2018-05-20 17:04:00,1996.1,20.3,-46.39,4.28,286.0,2.4
2018-05-20 17:23:00,2017.4,30.4,-46.46,4.3,88.0,1.7
2018-05-20 17:44:00,2033.7,33.5,-46.29,3.98,88.0,4.8
2018-05-20 17:59:00,1982.3,20.9,-46.27,3.96,88.0,3.4
2018-05-20 19:54:00,2101.0,46.1,-45.92,3.66,88.0,3.4
2018-05-20 20:14:00,2100.1,27.5,-46.34,4.01,88.0,2.7
2018-05-20 20:34:00,2096.8,29.3,-46.2,4.05,110.0,2.4
2018-05-20 20:55:00,2060.8,9.5,-46.11,3.87,0.0,1.7
2018-05-20 21:15:00,2043.8,9.5,-46.4,4.01,88.0,3.1
2018-05-20 21:35:00,2041.2,6.2,-46.29,4.11,132.0,1.4
2018-05-20 21:54:00,2057.3,13.8,-46.36,4.14,88.0,1.7
2018-05-20 22:14:00,2094.9,13.6,-46.51,4.06,88.0,1.0
2018-05-20 22:35:00,2150.2,21.3,-45.72,3.9,176.0,2.7
2018-05-20 22:55:00,2169.6,8.5,-46.65,3.74,88.0,2.7
2018-05-20 23:15:00,2191.4,21.2,-45.96,3.63,88.0,1.7
2018-05-20 23:35:00,2194.2,30.7,-46.35,3.61,132.0,1.7
2018-05-20 23:55:00,2178.8,18.8,-46.45,3.78,88.0,2.7
2018-05-21 00:14:00,2196.9,20.2,-46.18,3.95,88.0,2.4
2018-05-21 00:34:00,2176.0,8.0,-46.25,3.85,88.0,1.7
2018-05-21 00:54:00,2179.2,8.4,-46.1,3.58,88.0,0.7
2018-05-21 01:14:00,2172.6,8.1,-46.15,3.95,44.0,1.4
2018-05-21 01:35:00,2167.2,8.6,-46.12,4.02,88.0,1.4
2018-05-21 01:55:00,2165.2,6.6,-46.13,3.89,132.0,1.7
2018-05-21 02:15:00,2171.0,11.1,-46.09,3.76,44.0,1.4
2018-05-21 02:35:00,2155.4,12.1,-45.29,3.8,44.0,0.7
2018-05-21 02:55:00,2139.4,8.8,-45.77,3.92,176.0,0.7
2018-05-21 03:15:00,2174.6,8.8,-45.98,3.93,88.0,0.7
2018-05-21 03:34:00,2142.6,13.6,-45.79,3.87,0.0,1.0
2018-05-21 03:55:00,2147.5,8.1,-45.89,3.78,88.0,1.4
2018-05-21 04:15:00,2168.6,5.5,-45.84,3.78,88.0,1.4
2018-05-21 04:35:00,2213.5,29.7,-45.75,3.95,0.0,1.7
2018-05-21 04:55:00,2177.2,23.8,-45.84,3.89,0.0,0.7
2018-05-21 05:14:00,2160.0,35.7,-45.96,3.92,88.0,2.0
2018-05-21 05:34:00,2237.1,62.2,-45.52,3.9,308.0,3.1
2018-05-21 05:54:00,2211.9,46.9,-45.88,3.64,0.0,2.7
2018-05-21 06:14:00,2146.7,18.1,-46.05,3.83,308.0,1.7
2018-05-21 06:30:00,2160.3,23.4,-45.87,3.69,88.0,2.4
2018-05-21 08:25:00,2121.1,4.4,-45.93,3.97,nan,0.7
2018-05-21 08:45:00,2119.2,6.0,-45.77,3.76,0.0,1.0
2018-05-21 09:05:00,2111.9,4.2,-45.87,4.13,264.0,0.7
2018-05-21 09:26:00,2101.6,12.4,-45.43,4.05,132.0,0.3
2018-05-21 09:46:00,2115.0,58.4,-45.6,3.73,22.0,1.4
2018-05-21 10:06:00,2073.6,16.5,-45.71,4.21,88.0,1.7
2018-05-21 10:26:00,2053.3,8.6,-45.68,3.78,308.0,1.4
2018-05-21 10:46:00,2053.1,9.1,-45.48,3.82,176.0,1.4
2018-05-21 11:06:00,2089.8,85.7,-45.05,4.1,88.0,0.7
2018-05-21 11:26:00,2031.6,5.6,-45.53,4.15,132.0,1.4
2018-05-21 11:45:00,2016.4,6.6,-45.53,4.37,308.0,1.7
2018-05-21 12:05:00,2008.9,5.2,-45.55,4.25,308.0,1.0
2018-05-21 12:25:00,2022.8,4.9,-45.49,4.09,88.0,2.4
2018-05-21 12:45:00,2031.9,18.9,-45.43,4.04,264.0,2.0
2018-05-21 13:06:00,2028.2,5.5,-45.98,4.13,22.0,1.0
2018-05-21 13:26:00,2088.6,44.9,-45.22,3.79,132.0,1.7
2018-05-21 13:46:00,2064.7,45.6,-45.28,4.03,132.0,1.4
2018-05-21 14:06:00,2052.5,6.1,-45.92,3.72,88.0,3.4
2018-05-21 14:26:00,2057.7,5.0,-45.62,4.19,330.0,2.0
2018-05-21 14:46:00,2047.4,27.0,-45.7,4.05,0.0,2.4
2018-05-21 15:06:00,2045.6,24.3,-45.28,4.1,0.0,1.7
2018-05-21 15:26:00,2069.7,2.0,-45.48,4.37,88.0,1.7
2018-05-21 15:46:00,2075.9,3.9,-45.21,4.22,308.0,1.4
2018-05-21 16:06:00,2052.3,10.2,-45.75,4.17,132.0,1.0
2018-05-21 16:26:00,2032.1,9.5,-45.6,4.18,nan,2.4
2018-05-21 16:45:00,2031.9,48.2,-46.03,4.17,88.0,4.4
2018-05-21 17:06:00,1996.2,9.0,-45.75,4.29,0.0,3.1
2018-05-21 17:26:00,1987.7,11.5,-45.92,4.27,132.0,1.4
2018-05-21 17:45:00,2044.9,19.8,-45.84,4.03,132.0,3.4
2018-05-21 18:01:00,2064.2,3.2,-45.89,3.82,110.0,1.7
2018-05-21 19:56:00,2146.5,41.1,-45.98,3.74,88.0,1.0
2018-05-21 20:16:00,2107.2,9.9,-45.54,3.96,110.0,1.0
2018-05-21 20:36:00,2146.5,31.3,-45.54,3.82,176.0,0.3
2018-05-21 20:56:00,2242.7,20.1,-44.96,3.87,176.0,0.0
2018-05-21 21:16:00,2372.6,59.0,-44.93,3.7,264.0,0.3
2018-05-21 21:36:00,2295.4,46.7,-44.72,3.6,286.0,0.3
2018-05-21 21:56:00,2283.0,23.4,-44.76,3.37,286.0,1.4
2018-05-21 22:16:00,2228.7,17.2,-45.53,3.89,44.0,1.4
2018-05-21 22:36:00,2196.6,25.8,-45.32,3.89,88.0,2.4
2018-05-21 22:56:00,2169.4,23.8,-45.31,3.66,88.0,1.0
2018-05-21 23:15:00,2176.4,16.2,-45.76,3.72,88.0,0.3
2018-05-21 23:35:00,2121.1,14.2,-45.89,4.28,44.0,0.3
2018-05-21 23:56:00,2113.9,4.4,-46.24,3.83,0.0,1.0
2018-05-22 00:16:00,2133.3,10.4,-45.71,3.94,264.0,0.7
2018-05-22 00:36:00,2137.2,10.8,-46.2,3.69,44.0,0.7
2018-05-22 00:56:00,2160.6,6.0,-46.24,3.9,132.0,1.4
2018-05-22 01:15:00,2132.8,14.5,-46.29,3.81,88.0,2.7
2018-05-22 01:35:00,2115.7,3.0,-46.33,3.77,88.0,1.4
2018-05-22 01:55:00,2119.0,12.7,-46.38,3.9,0.0,1.4
2018-05-22 02:16:00,2129.8,18.1,-46.38,3.77,132.0,1.0
2018-05-22 02:36:00,2128.7,10.8,-46.49,3.93,330.0,0.0
2018-05-22 02:55:00,2151.4,21.0,-46.68,3.97,0.0,1.7
2018-05-22 03:15:00,2119.3,8.5,-46.21,3.83,44.0,2.0
2018-05-22 03:35:00,2093.7,8.8,-46.62,3.77,264.0,1.7
2018-05-22 03:55:00,2087.2,6.1,-46.55,4.08,308.0,1.7
2018-05-22 04:16:00,2085.1,4.9,-46.9,3.95,0.0,0.7
2018-05-22 04:36:00,2097.4,7.1,-46.57,3.76,264.0,0.7
2018-05-22 04:55:00,2096.6,4.5,-46.53,3.86,264.0,1.0
2018-05-22 05:15:00,2093.3,6.0,-46.44,3.94,308.0,0.7
2018-05-22 05:36:00,2080.0,4.2,-47.32,3.92,264.0,1.7
2018-05-22 05:56:00,2080.9,4.3,-46.45,4.0,330.0,1.7
2018-05-22 06:15:00,2069.7,7.7,-46.77,3.91,264.0,1.4
2018-05-22 06:31:00,2062.8,3.5,-46.66,3.68,264.0,2.4
2018-05-22 08:26:00,2025.2,8.5,-46.94,3.9,308.0,3.4
2018-05-22 08:46:00,2024.6,10.8,-46.72,4.27,264.0,1.7
2018-05-22 09:06:00,2018.2,3.4,-46.08,4.01,88.0,2.7
2018-05-22 09:25:00,2013.9,4.5,-46.77,4.45,220.0,3.4
2018-05-22 09:45:00,2009.0,4.0,-46.88,4.25,0.0,2.0
2018-05-22 10:05:00,2006.9,3.5,-46.54,3.94,0.0,3.1
2018-05-22 10:25:00,2007.4,6.7,-46.96,4.15,nan,2.0
2018-05-22 10:38:00,2004.6,2.8,-47.03,4.47,0.0,1.4
2018-05-22 14:42:00,1977.5,4.8,-46.06,4.64,220.0,4.1
2018-05-22 15:03:00,1978.9,4.3,-46.57,4.44,308.0,3.4
2018-05-22 15:23:00,1977.1,2.3,-46.59,4.21,0.0,3.4
2018-05-22 15:43:00,1978.2,5.9,-45.68,4.21,264.0,4.4
2018-05-22 16:02:00,1977.7,2.9,-45.92,4.54,264.0,1.7
2018-05-22 16:18:00,1976.0,1.1,-46.39,4.02,308.0,3.4
2018-05-22 18:12:00,1977.3,5.9,-46.23,4.3,44.0,2.4
2018-05-22 18:33:00,1968.9,2.8,-46.34,3.92,nan,nan
2018-05-22 18:52:00,1973.3,4.9,-46.32,4.3,154.0,1.7
2018-05-22 19:12:00,1978.5,4.2,-46.1,4.07,88.0,3.4
2018-05-22 19:32:00,1976.0,5.8,-45.89,4.27,132.0,3.1
2018-05-22 19:53:00,1981.3,7.0,-46.43,4.12,220.0,3.4
2018-05-22 20:13:00,1986.9,7.4,-46.06,4.35,nan,nan
2018-05-22 20:33:00,1982.0,7.4,-46.08,4.34,0.0,2.0
2018-05-22 20:52:00,1977.4,3.6,-45.8,4.03,88.0,3.7
2018-05-22 21:12:00,1983.9,7.5,-46.28,4.46,44.0,2.0
2018-05-22 21:32:00,1988.8,7.9,-46.08,4.28,44.0,2.0
2018-05-22 21:52:00,1986.1,2.8,-46.23,4.69,44.0,1.7
2018-05-22 22:12:00,1989.4,4.3,-46.03,4.26,nan,nan
2018-05-22 22:32:00,1980.7,3.0,-45.83,4.34,44.0,1.7
2018-05-22 22:52:00,1987.4,6.3,-45.78,4.31,132.0,0.3
2018-05-22 23:13:00,1986.3,7.4,-46.36,4.51,44.0,2.4
2018-05-22 23:33:00,1981.1,3.6,-45.89,4.11,176.0,2.7
2018-05-22 23:53:00,1986.8,3.3,-46.25,4.16,88.0,3.1
2018-05-23 00:13:00,1985.9,6.6,-46.43,4.33,242.0,1.0
2018-05-23 00:33:00,1979.7,3.8,-46.07,4.33,132.0,3.1
2018-05-23 00:53:00,1988.0,7.9,-46.46,4.18,308.0,3.1
2018-05-23 01:13:00,1984.6,10.1,-46.17,4.17,88.0,4.4
2018-05-23 01:33:00,1988.7,5.4,-46.15,3.98,176.0,3.1
2018-05-23 01:53:00,1976.4,3.7,-46.58,3.96,132.0,1.4
2018-05-23 02:13:00,1974.4,2.6,-46.19,4.11,88.0,4.1
2018-05-23 02:33:00,1973.8,3.2,-46.84,4.21,132.0,1.4
2018-05-23 02:53:00,1978.4,4.4,-47.39,3.85,132.0,0.7
2018-05-23 03:13:00,1973.6,1.6,-46.78,4.31,176.0,0.7
2018-05-23 03:33:00,1984.1,6.3,-46.67,4.29,0.0,2.0
2018-05-23 03:53:00,1978.1,5.1,-46.7,4.24,nan,nan
2018-05-23 04:12:00,1977.1,5.7,-46.97,4.36,242.0,2.4
2018-05-23 04:32:00,1977.6,7.6,-46.77,4.4,176.0,1.0
2018-05-23 04:48:00,1983.3,4.3,-47.1,4.41,220.0,1.0
2018-05-23 06:42:00,1975.8,3.9,-46.16,4.22,308.0,3.1
2018-05-23 07:02:00,1974.3,6.0,-46.86,4.21,308.0,2.7
2018-05-23 07:22:00,1983.1,3.6,-46.67,4.06,132.0,1.7
2018-05-23 07:43:00,1983.8,3.2,-46.72,4.2,308.0,1.4
2018-05-23 08:03:00,1985.5,4.5,-46.39,4.12,308.0,1.7
2018-05-23 08:22:00,1979.6,3.2,-46.46,4.13,308.0,1.7
2018-05-23 08:42:00,1976.5,1.7,-46.42,4.44,176.0,1.4
2018-05-23 09:03:00,1981.1,7.5,-46.86,4.08,132.0,1.4
2018-05-23 09:23:00,1978.1,2.5,-46.78,4.13,0.0,2.4
2018-05-23 09:42:00,1974.1,2.5,-46.45,4.55,0.0,4.4
2018-05-23 10:02:00,1978.5,3.7,-46.78,4.23,308.0,3.1
2018-05-23 10:22:00,1974.2,2.0,-47.04,4.15,308.0,2.4
2018-05-23 10:43:00,1978.0,2.8,-46.86,4.13,0.0,1.4
2018-05-23 11:02:00,1976.6,2.7,-47.0,4.29,176.0,2.4
2018-05-23 11:23:00,1974.2,2.4,-47.46,4.22,nan,2.0
2018-05-23 11:43:00,1976.4,2.5,-46.91,4.56,88.0,3.4
2018-05-23 12:03:00,1982.4,10.2,-46.83,4.22,44.0,4.8
2018-05-23 12:23:00,1979.6,7.4,-46.57,4.13,0.0,3.1
2018-05-23 12:42:00,1977.1,5.2,-46.62,4.08,220.0,3.4
2018-05-23 13:02:00,1979.1,13.6,-46.94,4.43,308.0,3.7
2018-05-23 13:23:00,1975.8,2.8,-47.25,4.19,308.0,3.4
2018-05-23 13:43:00,2022.0,63.1,-46.26,4.27,264.0,3.4
2018-05-23 14:03:00,1988.6,17.2,-46.65,4.02,88.0,4.1
2018-05-23 14:22:00,2025.8,77.1,-46.81,4.21,88.0,3.4
2018-05-23 14:42:00,1987.5,15.5,-46.76,4.07,132.0,3.4
2018-05-23 15:02:00,1977.6,2.5,-46.57,4.19,88.0,3.4
2018-05-23 15:22:00,1976.6,5.1,-47.21,4.32,308.0,3.4
2018-05-23 15:43:00,1980.0,3.8,-47.24,3.88,0.0,4.1
2018-05-23 16:02:00,1981.9,4.5,-46.7,4.2,308.0,2.7
2018-05-23 16:18:00,1980.4,2.6,-46.22,4.25,264.0,3.1
2018-05-23 18:13:00,1979.8,3.0,-46.62,4.4,308.0,3.4
2018-05-23 18:33:00,1984.0,3.0,-46.48,4.36,308.0,2.7
2018-05-23 18:53:00,1986.4,5.2,-46.92,4.23,88.0,2.4
2018-05-23 19:13:00,1982.7,4.5,-46.88,4.36,330.0,3.4
2018-05-23 19:33:00,1977.1,1.3,-46.64,4.14,88.0,4.1
2018-05-23 19:54:00,1978.2,1.7,-46.59,4.37,44.0,4.1
2018-05-23 20:13:00,1981.0,5.2,-46.39,4.11,242.0,3.4
2018-05-23 20:34:00,1990.8,6.1,-46.45,4.09,0.0,1.4
2018-05-23 20:53:00,1992.2,5.6,-46.47,4.37,22.0,3.1
2018-05-23 21:14:00,1985.0,2.8,-46.86,4.2,176.0,2.7
2018-05-23 21:34:00,1984.2,4.5,-46.81,4.56,264.0,3.4
2018-05-23 21:54:00,1983.5,1.9,-46.69,4.32,44.0,2.4
2018-05-23 22:14:00,1988.2,4.9,-46.33,4.29,264.0,2.0
2018-05-23 22:33:00,1985.3,2.7,-47.56,4.4,44.0,2.4
2018-05-23 22:53:00,1990.3,2.3,-46.35,3.96,0.0,2.0
2018-05-23 23:14:00,1995.5,13.2,-46.45,4.33,44.0,1.4
2018-05-23 23:33:00,1989.6,3.7,-46.17,4.0,44.0,3.4
2018-05-23 23:53:00,1988.5,4.7,-46.58,4.66,44.0,4.4
2018-05-24 00:13:00,1985.8,2.0,-46.52,4.09,308.0,2.4
2018-05-24 00:33:00,1987.7,4.2,-46.17,4.05,308.0,4.4
2018-05-24 00:53:00,1992.6,3.3,-46.01,4.12,308.0,2.0
2018-05-24 01:14:00,1987.4,4.3,-46.27,4.1,88.0,1.4
2018-05-24 01:34:00,1983.1,1.9,-46.8,3.73,0.0,4.4
2018-05-24 01:54:00,2011.3,42.0,-46.24,4.49,44.0,3.1
2018-05-24 02:14:00,1991.4,2.3,-46.74,4.44,242.0,3.7
2018-05-24 02:33:00,1993.8,3.5,-46.62,4.0,286.0,1.0
2018-05-24 02:54:00,2005.7,23.1,-46.85,4.2,176.0,2.7
2018-05-24 03:14:00,1999.6,5.0,-47.17,4.51,308.0,0.7
2018-05-24 03:34:00,1999.8,3.8,-46.49,4.23,286.0,1.4
2018-05-24 03:54:00,2001.4,2.5,-46.83,4.29,330.0,2.0
2018-05-24 04:13:00,1996.2,0.9,-46.77,4.06,286.0,2.0
2018-05-24 04:33:00,1998.5,3.2,-46.91,3.91,286.0,3.7
2018-05-24 04:49:00,1989.7,1.8,-47.33,3.78,132.0,3.1
2018-05-24 06:44:00,2011.3,6.3,-46.47,4.16,308.0,2.0
2018-05-24 07:04:00,2005.0,1.9,-46.73,4.14,286.0,1.4
2018-05-24 07:23:00,2006.8,1.6,-46.72,4.26,110.0,1.4
2018-05-24 07:44:00,2005.6,1.6,-46.18,4.26,308.0,2.7
2018-05-24 08:03:00,2008.8,2.8,-46.36,4.53,132.0,1.0
2018-05-24 08:24:00,2009.9,2.4,-46.6,3.97,0.0,2.4
2018-05-24 08:44:00,2008.5,3.2,-46.67,3.99,nan,1.7
2018-05-24 09:04:00,2004.5,2.0,-46.17,3.96,0.0,2.7
2018-05-24 09:24:00,2016.0,9.9,-46.42,4.18,132.0,2.7
2018-05-24 09:44:00,2021.8,14.4,-46.48,3.89,0.0,2.0
2018-05-24 10:04:00,2023.0,9.1,-46.7,4.08,nan,3.4
2018-05-24 10:24:00,2017.2,8.6,-46.54,3.93,176.0,2.4
2018-05-24 10:43:00,2017.8,4.4,-46.85,4.46,88.0,2.4
2018-05-24 11:03:00,2026.2,35.4,-46.3,4.13,308.0,3.7
2018-05-24 11:23:00,2019.2,20.5,-46.37,4.29,44.0,2.0
2018-05-24 11:43:00,2008.2,4.5,-46.41,4.4,220.0,0.7
2018-05-24 12:04:00,2000.6,4.0,-46.71,4.24,0.0,1.4
2018-05-24 12:24:00,1999.4,3.9,-46.85,4.17,286.0,2.0
2018-05-24 12:43:00,2008.6,4.3,-46.54,4.11,308.0,1.0
2018-05-24 13:03:00,2011.2,3.8,-46.67,4.06,264.0,1.7
2018-05-24 13:23:00,2011.3,4.5,-46.51,4.21,308.0,2.0
2018-05-24 13:44:00,2018.9,5.6,-46.24,3.97,286.0,2.7
2018-05-24 14:03:00,2020.3,3.3,-46.57,4.08,308.0,1.0
2018-05-24 14:23:00,2020.5,4.1,-46.75,4.67,154.0,2.4
2018-05-24 14:44:00,2046.5,16.7,-46.42,4.35,132.0,3.1
2018-05-24 15:04:00,2051.8,3.9,-46.13,4.04,220.0,2.4
2018-05-24 15:23:00,2057.9,7.7,-46.4,4.0,220.0,2.0
2018-05-24 15:43:00,2049.6,10.2,-46.39,4.25,176.0,2.4
2018-05-24 16:03:00,2041.7,5.6,-46.34,3.73,176.0,2.0
2018-05-24 16:19:00,2042.9,9.2,-46.19,4.17,220.0,1.0
2018-05-24 18:15:00,2075.7,8.2,-46.32,3.79,264.0,1.0
2018-05-24 18:35:00,2080.9,6.6,-46.47,3.94,264.0,1.0
2018-05-24 18:54:00,2093.9,8.2,-46.52,3.89,264.0,1.0
2018-05-24 19:14:00,2145.8,17.3,-46.3,3.9,308.0,1.0
2018-05-24 19:34:00,2160.9,18.0,-46.02,3.77,308.0,1.0
2018-05-24 19:54:00,2146.2,7.9,-45.64,3.76,264.0,1.7
2018-05-24 20:15:00,2140.2,12.9,-45.92,3.62,220.0,0.3
2018-05-24 20:35:00,2066.1,22.9,-45.89,4.13,0.0,1.4
2018-05-24 20:54:00,2027.5,10.3,-45.72,3.84,22.0,2.0
2018-05-24 21:14:00,2006.4,2.2,-45.89,4.13,88.0,2.4
2018-05-24 21:34:00,2014.7,6.9,-46.31,4.1,88.0,2.4
2018-05-24 21:54:00,2034.6,3.2,-46.17,4.21,308.0,2.0
2018-05-24 22:15:00,2014.8,9.3,-46.41,4.11,88.0,2.7
2018-05-24 22:35:00,2010.0,12.5,-46.38,4.05,0.0,2.4
2018-05-24 22:55:00,2004.1,4.1,-46.62,4.22,308.0,1.0
2018-05-24 23:15:00,1998.1,5.6,-46.15,4.16,330.0,1.4
2018-05-24 23:35:00,1989.9,1.6,-46.43,4.16,132.0,2.4
2018-05-24 23:54:00,1991.4,2.2,-46.33,4.14,0.0,1.7
2018-05-25 00:15:00,2000.6,5.4,-46.27,4.12,0.0,1.4
2018-05-25 00:34:00,2013.1,3.7,-46.0,3.92,132.0,2.4
2018-05-25 00:54:00,2008.0,4.4,-46.4,4.1,154.0,1.7
2018-05-25 01:15:00,2013.6,2.6,-46.47,4.25,264.0,1.0
2018-05-25 01:35:00,2023.6,4.4,-46.64,3.86,0.0,0.3
2018-05-25 01:55:00,2028.2,5.8,-46.58,4.02,0.0,0.7
2018-05-25 02:15:00,2041.1,8.9,-46.59,4.28,220.0,1.0
2018-05-25 02:34:00,2044.3,7.2,-46.85,4.25,308.0,1.4
2018-05-25 02:54:00,2043.4,5.0,-46.65,4.22,308.0,0.7
2018-05-25 03:14:00,2048.4,5.0,-46.64,3.68,264.0,1.4
2018-05-25 03:35:00,2054.3,8.9,-46.95,4.01,308.0,1.4
2018-05-25 03:54:00,2051.7,7.2,-46.67,3.92,308.0,2.0
2018-05-25 04:15:00,2057.5,6.3,-46.86,4.17,286.0,1.0
2018-05-25 04:35:00,2057.8,6.8,-47.0,4.21,308.0,1.4
2018-05-25 04:50:00,2059.3,3.2,-46.51,4.26,308.0,1.0
2018-05-25 06:45:00,2045.6,8.1,-46.6,4.21,264.0,1.0
2018-05-25 07:06:00,2037.0,4.7,-47.04,4.01,286.0,1.7
2018-05-25 07:25:00,2031.5,6.2,-46.65,4.26,0.0,0.7
2018-05-25 07:45:00,2039.6,7.3,-46.69,3.95,220.0,0.3
2018-05-25 08:05:00,2047.2,4.9,-46.88,3.68,308.0,1.4
2018-05-25 08:26:00,2053.6,6.3,-46.56,4.1,308.0,1.4
2018-05-25 08:46:00,2065.0,4.5,-46.62,4.03,264.0,0.7
2018-05-25 09:06:00,2075.0,4.2,-46.71,3.83,220.0,1.4
2018-05-25 09:25:00,2070.6,5.5,-46.73,4.07,308.0,0.0
2018-05-25 09:45:00,2063.3,9.2,-46.54,4.06,264.0,0.7
2018-05-25 10:06:00,2058.4,4.7,-46.74,4.36,88.0,1.4
2018-05-25 10:25:00,2063.6,9.2,-46.8,4.1,330.0,0.7
2018-05-25 10:46:00,2073.4,4.2,-46.47,3.8,88.0,0.7
2018-05-25 11:05:00,2084.3,8.5,-46.36,4.13,nan,0.7
2018-05-25 11:25:00,2093.1,4.6,-46.43,4.15,44.0,1.0
2018-05-25 11:45:00,2080.3,5.1,-46.57,3.96,264.0,2.0
2018-05-25 12:05:00,2082.4,6.7,-46.11,4.16,308.0,1.0
2018-05-25 12:25:00,2075.2,5.6,-46.67,4.08,176.0,0.7
2018-05-25 12:45:00,2066.9,4.6,-46.17,3.96,220.0,1.0
2018-05-25 12:58:00,2069.2,2.3,-46.65,4.18,308.0,2.0
2018-05-25 16:31:00,2073.9,5.6,-46.07,4.02,132.0,0.3
2018-05-25 16:51:00,2082.9,4.6,-46.36,4.14,308.0,0.7
2018-05-25 17:12:00,2077.9,4.6,-46.22,4.22,88.0,1.0
2018-05-25 17:32:00,2089.2,3.7,-46.57,3.98,0.0,1.0
2018-05-25 17:51:00,2091.5,6.2,-46.34,3.97,308.0,0.3
2018-05-25 18:07:00,2096.1,4.8,-46.45,4.15,308.0,1.0
2018-05-25 20:02:00,2103.9,4.0,-46.33,4.12,nan,1.0
2018-05-25 20:22:00,2115.0,20.7,-46.03,4.42,nan,2.4
2018-05-25 20:41:00,2128.0,22.8,-46.48,3.98,132.0,0.7
2018-05-25 21:01:00,2148.2,17.8,-45.85,3.66,220.0,1.0
2018-05-25 21:22:00,2156.7,18.0,-46.55,3.86,88.0,2.0
2018-05-25 21:42:00,2143.4,8.4,-46.49,4.05,88.0,2.4
2018-05-25 22:02:00,2146.8,3.5,-46.27,4.2,110.0,1.7
2018-05-25 22:21:00,2155.7,8.1,-46.45,3.72,132.0,0.7
2018-05-25 22:41:00,2163.1,4.4,-46.17,3.8,176.0,1.0
2018-05-25 23:01:00,2154.1,11.9,-46.11,4.08,88.0,1.0
2018-05-25 23:21:00,2146.7,14.6,-46.07,3.93,88.0,2.0
2018-05-25 23:41:00,2159.9,11.6,-45.56,3.73,nan,nan
2018-05-26 00:02:00,2157.4,8.2,-45.95,4.13,88.0,0.7
2018-05-26 00:22:00,2158.4,23.1,-45.64,3.8,176.0,1.4
2018-05-26 00:42:00,2127.6,10.9,-45.76,3.83,88.0,1.7
2018-05-26 01:02:00,2112.6,5.6,-46.57,4.05,176.0,0.7
2018-05-26 01:22:00,2110.0,15.0,-45.63,4.14,110.0,1.4
2018-05-26 01:42:00,2100.1,6.5,-46.03,4.4,nan,nan
2018-05-26 02:02:00,2116.4,24.5,-46.12,3.91,88.0,0.7
2018-05-26 02:21:00,2107.4,6.1,-46.32,4.05,nan,1.7
2018-05-26 02:41:00,2155.2,42.1,-46.42,4.01,88.0,1.0
2018-05-26 03:02:00,2132.9,5.9,-45.94,4.13,132.0,1.4
2018-05-26 03:22:00,2137.0,15.5,-46.68,3.71,nan,3.1
2018-05-26 03:41:00,2109.8,5.9,-46.28,3.8,176.0,1.7
2018-05-26 04:01:00,2111.6,14.8,-46.69,4.1,nan,1.4
2018-05-26 04:22:00,2154.8,8.5,-46.51,3.97,nan,nan
2018-05-26 04:42:00,2135.0,17.5,-46.6,3.92,nan,nan
2018-05-26 05:02:00,2125.2,43.2,-46.1,3.98,nan,3.1
2018-05-26 05:21:00,2116.8,14.6,-46.55,4.05,nan,nan
2018-05-26 05:42:00,2112.5,5.7,-46.73,3.78,nan,nan
2018-05-26 06:02:00,2113.1,3.6,-47.45,3.98,nan,nan
2018-05-26 06:21:00,2115.6,9.2,-46.74,3.79,nan,nan
2018-05-26 06:37:00,2182.1,31.7,-46.41,4.09,110.0,4.1
2018-05-26 08:31:00,2112.0,4.7,-46.8,3.83,nan,nan
2018-05-26 08:51:00,2139.4,37.8,-46.99,3.66,nan,nan
2018-05-26 09:12:00,2165.6,67.0,-46.98,3.88,88.0,5.4
2018-05-26 09:32:00,2168.3,62.9,-46.84,3.73,nan,nan
2018-05-26 09:52:00,2232.4,101.4,-46.88,3.89,nan,nan
2018-05-26 10:11:00,2144.8,62.1,-46.99,3.82,nan,nan
2018-05-26 10:32:00,2217.0,72.3,-46.54,3.52,nan,nan
2018-05-26 10:52:00,2215.1,85.0,-46.51,3.9,nan,nan
2018-05-26 11:11:00,2165.6,41.2,-46.74,3.69,nan,nan
2018-05-26 11:31:00,2184.2,63.3,-46.63,4.2,nan,nan
2018-05-26 11:51:00,2197.3,91.2,-46.59,3.92,88.0,3.7
2018-05-26 12:11:00,2197.0,74.9,-46.61,3.88,88.0,7.5
2018-05-26 12:31:00,2126.7,66.2,-46.17,3.94,132.0,4.4
2018-05-26 12:52:00,2108.6,77.7,-46.4,4.17,nan,5.8
2018-05-26 13:12:00,2115.2,83.9,-46.42,4.24,88.0,6.8
2018-05-26 13:32:00,2100.5,49.3,-46.6,3.98,132.0,4.1
2018-05-26 13:52:00,2217.4,103.8,-45.64,3.65,88.0,7.5
2018-05-26 14:11:00,2187.7,48.0,-45.84,3.94,88.0,2.4
2018-05-26 14:31:00,2094.5,50.4,-46.54,4.09,nan,6.8
2018-05-26 14:52:00,2045.1,29.1,-46.53,4.1,132.0,3.4
2018-05-26 15:12:00,2175.3,67.8,-45.83,3.97,nan,6.1
2018-05-26 15:32:00,2187.8,76.6,-46.01,3.87,88.0,5.8
2018-05-26 15:52:00,2128.0,86.3,-45.98,4.17,nan,8.2
2018-05-26 16:11:00,2157.1,75.2,-45.86,3.91,132.0,4.8
2018-05-26 16:31:00,2190.9,68.2,-45.86,4.02,132.0,8.5
2018-05-26 16:52:00,2162.3,56.1,-46.21,3.68,nan,6.8
2018-05-26 17:11:00,2206.9,78.5,-46.07,3.76,88.0,4.4
2018-05-26 17:31:00,2203.5,43.6,-46.02,3.79,110.0,3.4
2018-05-26 17:51:00,2187.2,65.6,-46.15,3.9,88.0,5.1
2018-05-26 18:07:00,2185.0,45.3,-46.31,3.6,88.0,2.7
2018-05-26 20:02:00,2244.5,52.4,-46.57,3.67,nan,4.1
2018-05-26 20:22:00,2236.7,42.1,-46.63,3.67,nan,3.4
2018-05-26 20:43:00,2258.0,74.3,-46.64,3.85,nan,5.1
2018-05-26 21:02:00,2241.3,56.7,-46.18,3.81,132.0,4.4
2018-05-26 21:23:00,2185.2,47.1,-46.89,3.98,nan,4.4
2018-05-26 21:43:00,2137.5,32.4,-46.69,3.95,88.0,3.4
2018-05-26 22:03:00,2177.0,43.3,-46.83,3.92,88.0,4.8
2018-05-26 22:23:00,2157.6,41.1,-46.96,4.04,132.0,2.7
2018-05-26 22:43:00,2174.4,81.0,-46.9,4.06,0.0,1.7
2018-05-26 23:03:00,2120.3,5.1,-47.6,4.09,nan,nan
2018-05-26 23:23:00,2236.4,80.0,-46.21,3.7,176.0,4.1
2018-05-26 23:42:00,2187.9,70.1,-47.07,3.76,88.0,3.7
2018-05-27 00:03:00,2126.5,9.7,-46.89,4.02,132.0,1.7
2018-05-27 00:23:00,2119.7,3.5,-47.25,3.95,0.0,2.0
2018-05-27 00:43:00,2126.3,6.0,-47.41,4.14,286.0,2.7
2018-05-27 01:02:00,2102.1,12.1,-46.95,4.12,0.0,2.4
2018-05-27 01:23:00,2094.3,24.8,-47.01,3.96,88.0,1.4
2018-05-27 01:43:00,2077.1,11.8,-46.9,4.04,0.0,1.4
2018-05-27 02:02:00,2084.7,13.3,-46.69,4.11,286.0,2.0
2018-05-27 02:22:00,2089.4,6.4,-47.07,4.39,132.0,2.0
2018-05-27 02:42:00,2108.1,27.3,-46.74,4.01,132.0,2.0
2018-05-27 03:02:00,2116.0,18.9,-46.8,3.83,0.0,4.4
2018-05-27 03:23:00,2211.6,49.4,-46.32,3.91,88.0,3.1
2018-05-27 03:43:00,2194.9,36.8,-46.45,4.05,nan,2.7
2018-05-27 04:02:00,2134.7,50.9,-46.67,4.12,176.0,1.7
2018-05-27 04:22:00,2085.8,3.7,-46.6,4.07,0.0,2.0
2018-05-27 04:42:00,2099.6,4.3,-46.9,3.97,88.0,2.7
2018-05-27 05:02:00,2098.1,2.9,-47.22,4.21,nan,2.0
2018-05-27 05:22:00,2148.4,32.2,-46.41,3.72,nan,nan
2018-05-27 05:42:00,2196.8,63.8,-46.57,3.88,nan,nan
2018-05-27 06:02:00,2219.9,38.2,-46.28,3.72,nan,nan
2018-05-27 06:22:00,2208.1,32.9,-46.71,3.83,nan,3.7
2018-05-27 06:38:00,2206.3,30.4,-46.88,4.03,0.0,3.1
2018-05-27 08:33:00,2193.7,8.8,-47.17,4.02,nan,nan
2018-05-27 08:53:00,2189.1,14.6,-47.71,3.78,nan,nan
2018-05-27 09:13:00,2204.8,39.5,-47.18,3.76,nan,nan
2018-05-27 09:33:00,2184.4,6.0,-47.76,3.86,nan,nan
2018-05-27 09:52:00,2191.1,9.3,-48.07,3.89,nan,nan
2018-05-27 10:13:00,2220.6,25.3,-47.91,3.83,nan,nan
2018-05-27 10:32:00,2231.3,19.6,-48.3,3.86,nan,nan
2018-05-27 10:53:00,2285.9,41.3,-48.31,3.64,nan,nan
2018-05-27 11:13:00,2286.1,55.4,-47.61,3.49,nan,nan
2018-05-27 11:33:00,2248.0,14.5,-48.14,4.15,nan,nan
2018-05-27 11:53:00,2210.2,10.7,-47.99,3.75,nan,nan
2018-05-27 12:13:00,2205.7,33.2,-47.58,3.79,nan,nan
2018-05-27 12:33:00,2185.2,11.7,-47.65,3.62,nan,nan
2018-05-27 12:53:00,2193.8,58.5,-47.41,4.03,nan,nan
2018-05-27 13:13:00,2177.0,23.3,-47.65,3.99,nan,nan
2018-05-27 13:33:00,2143.9,22.4,-47.26,3.83,88.0,1.4
2018-05-27 13:53:00,2154.0,62.7,-47.09,3.97,nan,nan
2018-05-27 14:12:00,2101.2,9.1,-47.65,3.95,nan,nan
2018-05-27 14:32:00,2117.3,94.4,-46.92,4.08,nan,nan
2018-05-27 14:53:00,2050.7,9.9,-46.74,4.08,nan,nan
2018-05-27 15:12:00,2052.5,6.5,-47.09,4.04,nan,nan
2018-05-27 15:33:00,2048.4,11.6,-46.95,4.27,nan,nan
2018-05-27 15:53:00,2049.4,34.4,-46.72,4.25,nan,nan
2018-05-27 16:12:00,2076.3,72.2,-46.44,4.02,nan,nan
2018-05-27 16:32:00,2023.6,11.1,-46.57,4.14,nan,nan
2018-05-27 16:52:00,2008.8,4.2,-46.65,4.21,nan,nan
2018-05-27 17:13:00,1997.6,6.6,-46.33,4.27,nan,nan
2018-05-27 17:33:00,1984.4,4.9,-46.36,4.6,nan,nan
2018-05-27 17:52:00,1976.6,6.3,-46.16,4.25,nan,nan
2018-05-27 18:08:00,1982.9,3.3,-46.25,4.43,nan,nan
2018-05-27 20:04:00,2002.9,8.0,-45.71,4.82,nan,nan
2018-05-27 20:23:00,2025.2,6.6,-46.14,4.16,nan,nan
2018-05-27 20:43:00,2029.3,6.8,-46.05,4.18,nan,nan
2018-05-27 21:04:00,2040.7,21.7,-46.18,4.33,nan,nan
2018-05-27 21:23:00,2069.5,13.6,-46.11,4.32,nan,nan
2018-05-27 21:43:00,2060.2,12.7,-46.16,3.93,nan,nan
2018-05-27 22:04:00,2042.6,7.4,-46.58,4.19,nan,nan
2018-05-27 22:24:00,2045.0,6.7,-47.19,4.36,nan,nan
2018-05-27 22:44:00,2041.8,11.6,-46.72,4.22,nan,nan
2018-05-27 23:04:00,2065.1,12.3,-46.56,4.05,nan,nan
2018-05-27 23:24:00,2093.2,7.9,-46.67,4.13,nan,nan
2018-05-27 23:44:00,2085.4,14.6,-46.17,4.31,nan,nan
2018-05-28 00:04:00,2120.4,17.1,-46.2,4.12,nan,nan
2018-05-28 00:23:00,2152.0,24.6,-46.55,4.1,nan,nan
2018-05-28 00:43:00,2219.5,33.2,-46.55,3.6,nan,nan
2018-05-28 01:04:00,2294.2,57.9,-46.46,3.58,nan,nan
2018-05-28 01:24:00,2534.0,118.8,-47.42,3.63,nan,nan
2018-05-28 01:44:00,2707.4,40.4,-48.86,2.99,nan,nan
2018-05-28 02:03:00,2731.2,25.1,-48.62,3.23,nan,nan
2018-05-28 02:24:00,2667.9,48.7,-48.06,3.0,nan,nan
2018-05-28 02:44:00,2603.0,21.5,-48.29,3.08,nan,nan
2018-05-28 03:04:00,2632.2,18.7,-47.34,3.09,nan,nan
2018-05-28 03:24:00,2578.0,29.7,-47.85,3.17,nan,nan
2018-05-28 03:44:00,2588.5,18.7,-48.15,3.17,nan,nan
2018-05-28 04:04:00,2577.9,28.2,-48.18,3.41,nan,nan
2018-05-28 04:24:00,2432.0,46.7,-47.74,3.43,nan,nan
2018-05-28 04:43:00,2399.0,20.0,-47.66,3.49,nan,nan
2018-05-28 05:04:00,2405.3,8.2,-48.12,3.39,nan,nan
2018-05-28 05:23:00,2375.8,28.7,-47.84,3.53,nan,nan
2018-05-28 05:43:00,2281.1,11.8,-48.21,3.87,nan,nan
2018-05-28 06:03:00,2261.3,7.3,-48.02,3.78,nan,nan
2018-05-28 06:24:00,2276.5,6.6,-47.69,3.52,nan,nan
2018-05-28 06:39:00,2273.0,3.3,-47.73,3.85,nan,nan
2018-05-28 08:33:00,2135.9,9.2,-47.91,3.94,nan,nan
2018-05-28 08:54:00,2152.8,26.0,-47.66,3.5,nan,nan
2018-05-28 09:14:00,2129.1,7.4,-47.77,4.0,nan,nan
2018-05-28 09:33:00,2110.5,3.5,-48.18,4.07,nan,nan
2018-05-28 09:53:00,2106.2,15.0,-47.81,3.94,nan,nan
2018-05-28 10:13:00,2083.7,5.6,-47.45,4.08,nan,nan
2018-05-28 10:33:00,2071.2,5.0,-47.65,4.5,nan,nan
2018-05-28 10:54:00,2059.9,2.3,-47.7,3.9,nan,nan
2018-05-28 11:14:00,2059.2,3.3,-47.5,4.36,132.0,2.0
2018-05-28 11:34:00,2059.5,3.2,-47.64,3.98,nan,nan
2018-05-28 11:54:00,2056.7,3.2,-47.39,4.1,nan,nan
2018-05-28 12:13:00,2059.4,7.1,-47.65,3.97,nan,nan
2018-05-28 12:34:00,2061.0,30.0,-47.28,4.25,88.0,2.4
2018-05-28 12:54:00,2065.1,20.0,-47.44,4.27,nan,nan
2018-05-28 13:14:00,2039.0,4.8,-47.76,4.14,nan,nan
2018-05-28 13:34:00,2061.5,57.1,-47.5,4.09,nan,nan
2018-05-28 13:54:00,2037.1,10.3,-47.46,4.03,nan,nan
2018-05-28 14:13:00,2103.8,47.8,-47.4,4.12,nan,nan
2018-05-28 14:33:00,2064.8,59.5,-47.52,4.37,nan,nan
2018-05-28 14:54:00,2039.5,3.2,-47.33,4.45,nan,nan
2018-05-28 15:14:00,2034.2,4.2,-47.02,4.09,nan,nan
2018-05-28 15:34:00,2037.1,3.8,-47.69,4.24,nan,nan
2018-05-28 15:54:00,2032.3,2.7,-47.24,4.41,nan,nan
2018-05-28 16:13:00,2038.5,5.7,-47.71,3.96,nan,nan
2018-05-28 16:34:00,2046.2,4.9,-47.4,4.46,nan,nan
2018-05-28 16:54:00,2040.9,7.1,-47.38,3.88,nan,nan
2018-05-28 17:13:00,2042.3,12.5,-47.48,4.51,nan,nan
2018-05-28 17:33:00,2031.6,4.9,-48.21,4.39,nan,nan
2018-05-28 17:53:00,2042.9,3.8,-47.51,4.22,nan,nan
2018-05-28 18:09:00,2044.2,4.5,-47.69,4.01,nan,nan
2018-05-28 20:05:00,2044.3,3.6,-46.95,4.29,220.0,2.0
2018-05-28 20:25:00,2052.9,1.8,-47.7,4.42,154.0,1.7
2018-05-28 20:44:00,2051.2,2.8,-48.06,4.15,0.0,3.1
2018-05-28 21:04:00,2059.9,6.2,-47.81,4.19,0.0,2.0
2018-05-28 21:25:00,2061.3,6.7,-47.7,4.11,nan,nan
2018-05-28 21:44:00,2066.6,2.7,-47.56,4.11,nan,nan
2018-05-28 22:04:00,2073.7,9.5,-47.42,4.51,nan,nan
2018-05-28 22:24:00,2071.5,2.3,-47.49,4.14,308.0,2.7
2018-05-28 22:45:00,2073.6,3.6,-47.46,4.34,132.0,3.1
2018-05-28 23:05:00,2071.2,2.0,-47.58,4.21,220.0,3.1
2018-05-28 23:24:00,2079.2,10.4,-47.26,4.14,88.0,2.0
2018-05-28 23:44:00,2074.4,2.7,-47.08,4.06,308.0,1.7
2018-05-29 00:04:00,2089.1,17.1,-47.3,3.63,nan,3.4
2018-05-29 00:25:00,2078.3,4.6,-47.34,4.45,264.0,1.7
2018-05-29 00:45:00,2071.3,4.9,-47.03,4.16,88.0,2.7
2018-05-29 01:04:00,2066.4,1.8,-47.16,4.02,264.0,2.4
2018-05-29 01:24:00,2068.9,3.7,-47.33,4.35,264.0,1.0
2018-05-29 01:45:00,2078.0,3.0,-47.46,3.87,264.0,3.7
2018-05-29 02:05:00,2089.9,3.7,-47.37,4.2,308.0,2.0
2018-05-29 02:24:00,2095.9,3.3,-47.75,4.04,264.0,1.7
2018-05-29 02:44:00,2111.3,33.4,-48.01,3.78,88.0,3.4
2018-05-29 03:04:00,2083.1,2.9,-47.88,4.18,0.0,2.4
2018-05-29 03:24:00,2076.5,2.8,-47.78,4.06,308.0,2.0
2018-05-29 03:45:00,2066.0,2.8,-47.95,4.24,0.0,4.4
2018-05-29 04:04:00,2056.7,3.5,-47.93,4.19,264.0,3.4
2018-05-29 04:25:00,2054.1,3.8,-48.21,4.15,176.0,2.4
2018-05-29 04:45:00,2046.5,5.9,-47.67,4.4,264.0,2.7
2018-05-29 05:05:00,2051.9,13.5,-47.66,4.15,264.0,5.1
2018-05-29 05:24:00,2041.8,2.3,-47.59,4.12,0.0,3.7
2018-05-29 05:44:00,2035.8,5.4,-48.0,4.21,88.0,3.4
2018-05-29 06:04:00,2044.5,10.5,-48.18,4.05,nan,nan
2018-05-29 06:24:00,2054.6,22.6,-47.87,3.88,nan,nan
2018-05-29 06:40:00,2048.7,7.4,-47.82,4.12,0.0,3.4
2018-05-29 08:34:00,2039.3,13.5,-48.08,4.37,nan,nan
2018-05-29 08:54:00,2032.8,16.6,-47.96,4.27,nan,1.4
2018-05-29 09:14:00,2050.4,35.7,-47.79,4.29,88.0,4.1
2018-05-29 09:35:00,2025.9,2.0,-47.71,3.84,nan,2.4
2018-05-29 09:55:00,2029.0,6.5,-47.92,4.2,0.0,1.7
2018-05-29 10:07:00,2016.7,1.4,-48.35,4.53,286.0,2.0
2018-05-29 12:08:00,2032.7,15.9,-47.45,4.23,88.0,2.0
2018-05-29 12:28:00,2045.2,9.4,-47.49,4.04,0.0,3.7
2018-05-29 12:48:00,2075.6,56.0,-47.33,4.21,nan,3.7
2018-05-29 13:08:00,2063.6,33.9,-47.38,3.87,0.0,2.4
2018-05-29 13:29:00,2036.4,5.1,-48.05,4.1,176.0,2.7
2018-05-29 13:40:00,2023.9,1.5,-48.81,3.82,88.0,1.7
2018-05-29 15:47:00,2031.5,6.0,-48.08,4.11,nan,1.7
2018-05-29 16:06:00,2013.5,8.1,-49.11,4.34,308.0,1.7
2018-05-29 16:26:00,2004.0,2.5,-48.52,4.2,264.0,1.4
2018-05-29 16:47:00,2003.3,2.7,-48.54,4.21,286.0,3.1
2018-05-29 17:06:00,2000.2,4.9,-48.68,4.33,0.0,3.4
2018-05-29 17:22:00,1990.7,1.8,-48.95,4.2,88.0,3.1
2018-05-29 19:17:00,1996.2,1.9,-48.13,4.04,308.0,2.0
2018-05-29 19:37:00,1999.3,2.5,-48.4,4.16,0.0,3.4
2018-05-29 19:57:00,1999.4,1.9,-48.04,4.2,88.0,3.1
2018-05-29 20:17:00,1997.8,5.7,-48.01,4.62,0.0,4.8
2018-05-29 20:36:00,1987.6,2.3,-47.89,4.05,308.0,3.1
2018-05-29 20:56:00,1987.6,2.6,-47.91,4.46,nan,3.1
2018-05-29 21:17:00,1992.2,5.8,-47.73,4.26,264.0,2.7
2018-05-29 21:37:00,1983.7,1.8,-47.53,4.01,264.0,3.4
2018-05-29 21:57:00,1995.9,15.0,-48.05,4.03,0.0,3.7
2018-05-29 22:17:00,1984.5,3.0,-47.59,4.26,0.0,1.0
2018-05-29 22:36:00,1981.0,5.4,-47.67,4.21,264.0,2.7
2018-05-29 22:57:00,1982.8,2.1,-47.22,4.4,0.0,2.0
2018-05-29 23:17:00,1989.9,13.6,-47.78,4.08,nan,1.7
2018-05-29 23:37:00,1987.3,3.5,-47.52,4.08,nan,2.0
2018-05-29 23:56:00,1981.5,2.7,-47.26,4.34,132.0,1.0
2018-05-30 00:17:00,1981.7,4.1,-47.45,4.3,176.0,2.0
2018-05-30 00:37:00,1991.5,7.2,-47.22,4.21,88.0,1.0
2018-05-30 00:57:00,2001.4,3.9,-47.68,3.85,nan,1.4
2018-05-30 01:17:00,2000.1,7.2,-46.93,3.85,88.0,1.4
2018-05-30 01:36:00,1987.1,6.6,-47.38,4.11,nan,0.7
2018-05-30 01:57:00,2002.8,17.7,-47.77,4.21,132.0,1.4
2018-05-30 02:17:00,1990.7,3.8,-47.57,3.91,0.0,2.0
2018-05-30 02:37:00,1986.5,3.1,-47.65,4.38,0.0,2.0
2018-05-30 02:56:00,1985.5,4.1,-47.47,4.33,0.0,1.0
2018-05-30 03:16:00,1985.2,2.3,-47.25,4.23,0.0,1.4
2018-05-30 03:37:00,1997.6,10.4,-47.15,3.91,0.0,0.7
2018-05-30 03:56:00,2010.3,3.7,-47.11,3.94,176.0,1.4
2018-05-30 04:16:00,2014.4,23.7,-47.27,3.82,nan,1.4
2018-05-30 04:36:00,2000.8,2.9,-47.29,4.13,0.0,1.0
2018-05-30 04:57:00,1994.6,2.0,-47.72,4.2,0.0,1.4
2018-05-30 05:17:00,1993.5,3.6,-47.45,4.0,308.0,1.4
2018-05-30 05:37:00,1997.0,2.3,-47.6,4.33,0.0,1.0
2018-05-30 05:52:00,2002.7,1.7,-47.48,4.08,132.0,1.0
2018-05-30 07:47:00,2036.1,29.4,-47.31,4.37,88.0,2.0
2018-05-30 08:07:00,2048.3,18.0,-47.73,4.13,0.0,1.0
2018-05-30 08:27:00,2041.4,13.3,-47.35,3.92,220.0,0.3
2018-05-30 08:46:00,2038.7,9.0,-47.57,4.33,308.0,0.7
2018-05-30 09:07:00,2037.2,12.9,-47.73,4.03,264.0,1.0
2018-05-30 09:27:00,2028.9,9.0,-47.28,3.9,264.0,0.7
2018-05-30 09:46:00,2035.3,9.0,-47.89,3.88,0.0,1.0
2018-05-30 10:07:00,2031.3,9.2,-47.2,4.26,0.0,1.0
2018-05-30 10:27:00,2031.7,3.9,-47.69,4.19,88.0,2.0
2018-05-30 10:47:00,2040.6,3.9,-47.16,3.96,220.0,0.3
2018-05-30 11:06:00,2054.8,5.8,-47.54,4.09,0.0,1.4
2018-05-30 11:27:00,2071.8,9.1,-47.74,4.28,264.0,1.4
2018-05-30 11:46:00,2092.6,17.3,-47.73,3.85,88.0,1.7
2018-05-30 12:07:00,2117.7,32.2,-47.3,4.11,220.0,1.0
2018-05-30 12:27:00,2099.2,22.8,-47.75,4.11,176.0,1.0
2018-05-30 12:47:00,2113.6,50.9,-47.63,3.91,nan,1.7
2018-05-30 13:06:00,2123.4,79.2,-47.49,3.82,88.0,0.3
2018-05-30 13:27:00,2107.3,58.6,-47.52,4.18,nan,0.7
2018-05-30 13:47:00,2070.4,40.2,-47.84,3.9,132.0,1.4
2018-05-30 14:06:00,2133.9,153.5,-47.39,3.96,264.0,0.7
2018-05-30 14:26:00,2106.6,72.3,-47.32,4.07,88.0,1.0
2018-05-30 14:47:00,2170.2,112.9,-46.63,3.93,176.0,0.3
2018-05-30 15:06:00,2053.5,7.8,-47.96,4.09,nan,1.7
2018-05-30 15:26:00,2048.8,5.9,-47.92,4.23,110.0,1.7
2018-05-30 15:47:00,2051.8,12.3,-47.7,4.08,88.0,0.7
2018-05-30 16:06:00,2063.2,30.5,-47.44,3.94,0.0,1.0
2018-05-30 16:26:00,2094.3,8.3,-46.84,3.86,308.0,0.7
2018-05-30 16:46:00,2047.5,8.6,-47.62,4.05,132.0,1.0
2018-05-30 17:07:00,2048.3,8.8,-47.49,4.24,176.0,1.0
2018-05-30 17:22:00,2064.3,21.5,-47.81,4.26,220.0,1.4
2018-05-30 19:17:00,2125.0,16.4,-47.43,3.86,0.0,0.0
2018-05-30 19:38:00,2110.8,9.5,-47.63,3.88,264.0,0.7
2018-05-30 19:58:00,2141.1,24.3,-47.41,4.43,176.0,0.3
2018-05-30 20:18:00,2141.2,46.9,-47.74,4.0,132.0,1.0
2018-05-30 20:38:00,2099.1,23.3,-47.43,4.07,88.0,0.7
2018-05-30 20:58:00,2117.1,30.5,-47.49,3.73,132.0,0.3
2018-05-30 21:17:00,2226.9,138.7,-47.33,4.07,88.0,0.3
2018-05-30 21:37:00,2256.9,57.6,-47.31,3.84,88.0,0.0
2018-05-30 21:58:00,2269.1,30.6,-47.38,3.71,nan,nan
2018-05-30 22:18:00,2305.6,17.9,-47.33,4.11,88.0,0.3
2018-05-30 22:37:00,2354.4,30.3,-47.94,3.45,88.0,2.7
2018-05-30 22:57:00,2407.5,12.8,-48.38,3.47,88.0,1.4
2018-05-30 23:17:00,2363.9,5.9,-48.2,3.67,110.0,2.0
2018-05-30 23:37:00,2367.9,9.6,-48.38,3.28,88.0,1.7
2018-05-30 23:57:00,2315.2,19.4,-48.66,3.55,88.0,2.7
2018-05-31 00:18:00,2191.0,24.3,-48.1,4.1,88.0,2.7
2018-05-31 00:37:00,2186.3,17.6,-47.93,3.8,132.0,1.4
2018-05-31 00:57:00,2170.1,13.0,-48.47,3.83,88.0,2.4
2018-05-31 01:17:00,2142.3,8.5,-48.09,3.77,132.0,2.0
2018-05-31 01:37:00,2125.8,8.6,-47.87,3.57,88.0,1.4
2018-05-31 01:57:00,2143.4,44.7,-47.67,4.26,132.0,1.0
2018-05-31 02:18:00,2168.0,41.9,-47.56,3.7,nan,nan
2018-05-31 02:38:00,2199.6,17.6,-48.09,3.8,132.0,1.7
2018-05-31 02:58:00,2239.5,8.9,-48.09,4.07,88.0,1.4
2018-05-31 03:18:00,2204.3,28.4,-47.67,3.87,nan,nan
2018-05-31 03:37:00,2202.0,6.7,-47.99,3.65,176.0,1.7
2018-05-31 03:57:00,2214.4,15.9,-48.25,3.78,88.0,1.7
2018-05-31 04:18:00,2221.8,20.0,-48.1,3.76,132.0,0.3
2018-05-31 04:37:00,2220.2,11.7,-47.93,3.8,132.0,1.4
2018-05-31 04:57:00,2233.8,23.6,-47.46,3.91,nan,nan
2018-05-31 05:17:00,2251.7,78.9,-47.68,3.91,0.0,2.0
2018-05-31 05:37:00,2203.2,24.7,-47.76,3.78,88.0,0.7
2018-05-31 05:53:00,2185.8,7.3,-47.77,4.2,88.0,1.7
2018-05-31 07:48:00,2196.3,12.4,-47.03,3.81,nan,1.0
2018-05-31 08:07:00,2170.5,7.7,-47.68,3.92,132.0,0.7
2018-05-31 08:27:00,2240.4,75.3,-46.96,3.71,220.0,1.4
2018-05-31 08:47:00,2237.4,70.1,-47.77,3.38,88.0,1.0
2018-05-31 09:07:00,2204.0,8.8,-47.36,3.92,nan,2.0
2018-05-31 09:28:00,2179.8,22.0,-47.59,3.61,nan,2.4
2018-05-31 09:47:00,2157.0,31.8,-47.67,4.01,0.0,2.7
2018-05-31 10:07:00,2145.3,28.7,-47.27,3.85,88.0,2.0
2018-05-31 10:27:00,2167.7,60.5,-47.11,3.98,132.0,2.4
2018-05-31 10:48:00,2095.0,12.9,-48.02,4.04,nan,2.4
2018-05-31 11:07:00,2130.6,74.7,-47.15,4.16,nan,2.7
2018-05-31 11:28:00,2119.8,36.3,-47.34,3.57,88.0,2.4
2018-05-31 11:47:00,2106.0,15.0,-47.54,3.98,88.0,3.7
2018-05-31 12:08:00,2101.9,14.1,-47.96,3.73,110.0,2.4
2018-05-31 12:27:00,2074.0,6.7,-47.96,3.83,88.0,3.1
2018-05-31 12:47:00,2081.3,12.2,-48.18,4.04,132.0,3.7
2018-05-31 13:08:00,2127.1,53.0,-47.53,4.15,nan,3.1
2018-05-31 13:28:00,2092.4,5.1,-47.81,4.09,88.0,3.1
2018-05-31 16:13:00,2070.4,14.6,-47.71,4.08,132.0,4.1
2018-05-31 16:32:00,2117.6,7.6,-49.08,4.13,110.0,3.1
2018-05-31 16:52:00,2120.7,13.4,-49.4,4.32,88.0,4.1
2018-05-31 17:12:00,2131.9,6.4,-49.31,3.71,110.0,2.4
2018-05-31 17:32:00,2121.5,9.7,-48.93,4.01,88.0,4.1
2018-05-31 17:48:00,2125.8,7.2,-48.73,3.73,88.0,2.4
2018-05-31 19:43:00,2038.7,8.8,-48.25,3.99,264.0,1.4
2018-05-31 20:02:00,2044.7,3.8,-47.99,4.06,132.0,3.4
2018-05-31 20:22:00,2033.7,3.1,-48.09,4.54,nan,2.0
2018-05-31 20:42:00,2058.6,6.8,-47.81,4.4,nan,2.4
2018-05-31 21:03:00,2069.1,3.5,-48.19,3.94,132.0,2.4
2018-05-31 21:23:00,2105.6,26.5,-47.88,4.16,nan,2.4
2018-05-31 21:43:00,2177.6,41.7,-48.01,4.02,nan,2.0
2018-05-31 22:03:00,2194.4,5.9,-48.54,3.82,132.0,1.7
2018-05-31 22:22:00,2212.8,15.1,-48.19,4.11,132.0,1.7
2018-05-31 22:43:00,2217.5,50.4,-48.0,3.73,88.0,1.7
2018-05-31 23:02:00,2255.8,42.3,-48.01,3.88,nan,1.4
2018-05-31 23:23:00,2244.3,5.1,-48.53,3.46,nan,1.0
2018-05-31 23:42:00,2273.3,18.3,-47.95,3.73,88.0,1.0
2018-06-01 00:02:00,2241.5,6.7,-48.1,3.75,132.0,1.0
2018-06-01 00:22:00,2304.1,34.8,-48.16,3.58,88.0,2.0
2018-06-01 00:43:00,2349.6,7.2,-48.21,3.94,132.0,1.4
2018-06-01 01:03:00,2328.9,12.9,-48.24,3.29,88.0,1.7
2018-06-01 01:22:00,2306.3,9.4,-48.38,3.84,nan,2.0
2018-06-01 01:42:00,2399.9,152.3,-47.48,3.61,88.0,0.0
2018-06-01 02:03:00,2293.2,36.8,-48.32,3.57,88.0,1.0
2018-06-01 02:22:00,2401.7,77.2,-46.64,3.63,132.0,1.0
2018-06-01 02:42:00,2268.7,52.8,-47.21,3.89,132.0,0.3
2018-06-01 03:03:00,2229.2,9.3,-47.46,3.85,176.0,0.7
2018-06-01 03:23:00,2214.8,10.1,-47.69,3.84,88.0,0.0
2018-06-01 03:43:00,2181.6,39.8,-47.49,3.99,176.0,0.7
2018-06-01 04:02:00,2098.0,9.1,-47.68,4.47,220.0,1.4
2018-06-01 04:22:00,2075.4,11.4,-47.85,4.27,220.0,0.7
2018-06-01 04:42:00,2061.5,5.5,-47.87,4.02,264.0,1.4
2018-06-01 05:03:00,2070.9,4.7,-47.65,4.03,286.0,1.4
2018-06-01 05:22:00,2064.1,5.5,-47.23,3.77,0.0,0.7
2018-06-01 05:42:00,2067.1,4.0,-47.83,3.96,176.0,0.7
2018-06-01 06:02:00,2065.4,5.0,-47.27,3.94,308.0,0.7
2018-06-01 06:18:00,2072.4,5.2,-47.23,4.06,0.0,0.3
2018-06-01 08:12:00,2035.6,3.6,-47.15,4.23,264.0,1.7
2018-06-01 08:32:00,2028.2,3.8,-46.87,4.27,0.0,1.4
2018-06-01 08:52:00,2021.8,6.9,-47.15,3.72,308.0,1.7
2018-06-01 09:13:00,2015.7,4.4,-47.29,4.2,286.0,1.4
2018-06-01 09:33:00,2012.1,7.2,-47.26,4.13,220.0,1.0
2018-06-01 09:52:00,2012.7,7.9,-47.06,4.25,286.0,1.4
2018-06-01 10:12:00,2000.1,5.3,-47.18,4.29,176.0,1.4
2018-06-01 10:33:00,2000.2,5.0,-47.58,4.07,264.0,1.0
2018-06-01 10:52:00,2015.7,9.1,-47.05,3.93,132.0,0.3
2018-06-01 11:12:00,2019.7,6.9,-47.33,3.81,264.0,1.7
2018-06-01 11:33:00,2025.1,6.1,-46.96,4.16,0.0,2.0
2018-06-01 11:52:00,2021.7,4.3,-46.97,4.25,308.0,3.1
2018-06-01 12:12:00,2017.1,4.2,-47.19,4.02,0.0,1.4
2018-06-01 12:32:00,2001.4,8.2,-47.27,4.05,0.0,1.0
2018-06-01 12:52:00,1999.6,10.0,-47.31,4.59,286.0,1.4
2018-06-01 13:12:00,2000.9,5.8,-47.52,4.17,176.0,1.7
2018-06-01 13:33:00,2005.4,5.8,-47.38,4.25,220.0,0.7
2018-06-01 13:52:00,2002.2,7.0,-47.0,4.29,220.0,1.0
2018-06-01 14:12:00,2007.9,6.1,-47.22,4.44,132.0,2.4
2018-06-01 14:32:00,2021.6,12.0,-47.63,4.35,220.0,1.4
2018-06-01 14:53:00,2042.0,5.9,-47.45,4.17,132.0,2.4
2018-06-01 15:12:00,2039.7,8.1,-47.54,4.04,176.0,1.4
2018-06-01 15:33:00,2053.9,13.0,-47.47,4.24,264.0,1.7
2018-06-01 15:52:00,2037.9,6.7,-48.04,4.29,176.0,3.1
2018-06-01 16:13:00,2037.5,8.2,-47.44,4.18,220.0,1.4
2018-06-01 16:33:00,2021.6,7.4,-48.12,4.08,198.0,4.1
2018-06-01 16:52:00,2023.2,4.8,-47.69,4.19,176.0,2.4
2018-06-01 17:12:00,2024.5,5.0,-47.55,4.2,220.0,3.4
2018-06-01 17:32:00,2027.5,6.1,-48.16,4.11,308.0,1.7
2018-06-01 17:48:00,2032.2,8.4,-47.68,4.27,308.0,2.4
2018-06-01 19:43:00,2044.1,7.0,-47.67,4.4,176.0,0.7
2018-06-01 20:03:00,2054.1,5.2,-47.81,4.0,88.0,0.7
2018-06-01 20:23:00,2052.3,4.3,-47.6,3.91,220.0,2.0
2018-06-01 20:44:00,2070.4,7.1,-47.74,4.05,220.0,1.4
2018-06-01 21:04:00,2074.8,4.9,-47.61,4.09,176.0,1.7
2018-06-01 21:24:00,2086.4,10.0,-47.59,3.9,220.0,1.0
2018-06-01 21:43:00,2090.6,7.0,-47.63,4.45,308.0,2.0
2018-06-01 22:04:00,2091.7,7.3,-47.96,3.98,264.0,3.1
2018-06-01 22:24:00,2090.1,7.7,-47.86,4.01,0.0,0.3
2018-06-01 22:43:00,2078.2,4.4,-47.86,4.33,220.0,0.3
2018-06-01 23:04:00,2077.3,3.7,-48.26,3.97,264.0,2.4
2018-06-01 23:23:00,2074.4,3.8,-47.62,4.02,308.0,1.7
2018-06-01 23:43:00,2068.8,4.0,-47.46,4.01,264.0,1.0
2018-06-02 00:03:00,2073.9,4.1,-47.35,3.97,220.0,1.7
2018-06-02 00:23:00,2081.6,6.3,-47.55,4.13,264.0,1.7
2018-06-02 00:44:00,2078.9,4.0,-47.72,4.07,220.0,0.7
2018-06-02 01:03:00,2086.5,5.4,-47.54,4.16,264.0,1.4
2018-06-02 01:23:00,2099.6,4.0,-47.81,4.15,176.0,1.0
2018-06-02 01:44:00,2100.2,3.7,-47.59,4.0,220.0,1.7
2018-06-02 02:03:00,2115.6,8.1,-47.62,4.0,242.0,2.0
2018-06-02 02:23:00,2124.3,6.7,-47.44,3.81,0.0,1.4
2018-06-02 02:43:00,2124.8,4.2,-47.31,3.95,264.0,2.0
2018-06-02 03:03:00,2131.4,4.7,-47.15,4.06,264.0,2.0
2018-06-02 03:24:00,2138.5,7.9,-47.42,3.82,308.0,1.4
2018-06-02 03:44:00,2148.2,5.0,-47.26,3.89,220.0,1.4
2018-06-02 04:04:00,2147.1,4.5,-47.39,3.98,264.0,0.7
2018-06-02 04:24:00,2068.0,17.6,-47.69,3.99,264.0,2.7
2018-06-02 04:43:00,2071.9,6.8,-47.18,4.03,308.0,2.0
2018-06-02 05:03:00,2039.4,5.9,-47.57,4.17,264.0,3.1
2018-06-02 05:24:00,2035.6,3.6,-47.08,4.38,264.0,1.7
2018-06-02 05:44:00,2033.6,5.1,-47.62,4.21,308.0,2.4
2018-06-02 06:04:00,2030.5,3.8,-47.29,4.22,220.0,2.7
2018-06-02 06:19:00,2034.2,2.1,-47.26,4.36,286.0,2.0
2018-06-02 08:14:00,2044.1,5.2,-47.0,3.91,176.0,0.3
2018-06-02 08:33:00,2052.2,3.9,-47.77,4.29,308.0,1.0
2018-06-02 08:53:00,2041.8,5.7,-47.49,4.0,308.0,1.7
2018-06-02 09:14:00,2034.1,5.3,-47.58,3.98,220.0,2.4
2018-06-02 09:34:00,2045.4,8.7,-47.4,4.13,264.0,1.4
2018-06-02 09:53:00,2051.4,3.6,-47.19,4.0,88.0,2.4
2018-06-02 10:13:00,2036.4,6.9,-47.44,4.17,0.0,2.0
2018-06-02 10:33:00,2031.4,3.6,-47.39,3.99,0.0,1.7
2018-06-02 10:54:00,2033.7,10.6,-47.7,4.13,264.0,1.7
2018-06-02 11:14:00,2007.1,8.6,-46.92,4.06,308.0,2.7
2018-06-02 11:33:00,2003.0,10.2,-47.54,4.16,264.0,4.4
2018-06-02 11:54:00,2005.6,6.6,-47.09,4.13,264.0,2.0
2018-06-02 12:14:00,2004.1,6.6,-47.07,4.24,286.0,2.7
2018-06-02 12:34:00,2007.0,4.4,-47.23,3.91,308.0,2.0
2018-06-02 12:53:00,1999.6,8.2,-47.36,4.19,264.0,3.1
2018-06-02 13:14:00,1993.8,10.5,-47.87,4.24,132.0,130.4
2018-06-02 13:34:00,1996.3,6.5,-47.48,4.07,88.0,26.4
2018-06-02 13:54:00,1990.9,6.7,-47.43,4.31,264.0,26.4
2018-06-02 14:13:00,1991.2,5.7,-47.39,4.01,264.0,1.7
2018-06-02 14:34:00,1983.3,7.4,-47.22,4.29,nan,1.0
2018-06-02 14:54:00,1978.4,7.5,-47.27,4.14,220.0,2.4
2018-06-02 15:14:00,1976.7,7.1,-47.44,4.33,220.0,2.4
2018-06-02 15:34:00,1978.4,4.6,-47.51,4.08,264.0,2.0
2018-06-02 15:53:00,1978.1,7.0,-47.76,4.46,264.0,3.4
2018-06-02 16:13:00,1977.0,4.6,-47.58,4.05,264.0,4.1
2018-06-02 16:34:00,1982.5,7.2,-46.92,4.02,176.0,2.4
2018-06-02 16:53:00,1990.6,13.3,-47.16,4.0,nan,2.7
2018-06-02 17:13:00,1989.6,6.3,-47.6,4.15,308.0,4.1
2018-06-02 17:33:00,2002.3,14.6,-47.12,4.06,264.0,1.7
2018-06-02 17:49:00,1995.4,5.0,-47.2,4.36,308.0,2.0
2018-06-02 19:45:00,2037.7,14.6,-47.12,4.29,308.0,1.4
2018-06-02 20:04:00,2040.6,12.4,-47.27,4.38,264.0,1.7
2018-06-02 20:24:00,2027.3,19.3,-46.79,4.21,308.0,1.0
2018-06-02 20:45:00,1998.7,6.4,-46.96,4.06,220.0,2.4
2018-06-02 21:05:00,2003.5,6.7,-46.99,4.1,176.0,2.0
2018-06-02 21:24:00,2018.6,3.7,-47.0,3.94,264.0,1.4
2018-06-02 21:45:00,2028.3,10.3,-46.78,4.18,176.0,2.0
2018-06-02 22:05:00,2049.2,11.0,-47.13,4.04,220.0,2.0
2018-06-02 22:25:00,2073.4,13.0,-46.98,3.78,0.0,2.0
2018-06-02 22:44:00,2068.3,11.0,-47.06,4.08,0.0,0.7
2018-06-02 23:04:00,2049.7,6.9,-47.26,4.22,176.0,1.4
2018-06-02 23:24:00,2045.8,4.5,-46.9,4.33,176.0,0.7
2018-06-02 23:44:00,2034.5,5.1,-47.32,4.01,308.0,1.7
2018-06-03 00:05:00,2035.7,6.7,-46.91,4.43,264.0,1.4
2018-06-03 00:25:00,2062.8,8.6,-46.77,3.95,264.0,0.3
2018-06-03 00:44:00,2093.6,16.5,-46.94,3.93,0.0,0.3
2018-06-03 01:04:00,2085.8,13.8,-46.75,4.14,132.0,1.7
2018-06-03 01:24:00,2061.0,7.0,-46.72,4.12,264.0,1.4
2018-06-03 01:45:00,2061.7,4.8,-46.5,4.15,0.0,1.0
2018-06-03 02:04:00,2074.6,11.3,-46.7,4.16,308.0,0.7
2018-06-03 02:24:00,2085.6,8.5,-46.84,4.0,308.0,0.7
2018-06-03 02:45:00,2125.8,14.6,-46.28,3.78,308.0,0.7
2018-06-03 03:04:00,2110.3,22.5,-46.33,4.06,176.0,1.0
2018-06-03 03:24:00,2074.1,6.6,-47.13,4.04,220.0,1.7
2018-06-03 03:45:00,2093.9,8.3,-46.63,4.18,308.0,0.7
2018-06-03 04:04:00,2117.2,6.9,-46.48,3.8,88.0,0.7
2018-06-03 04:25:00,2101.6,5.3,-46.73,4.01,176.0,0.7
2018-06-03 04:44:00,2095.0,5.7,-46.71,4.13,308.0,0.3
2018-06-03 05:04:00,2099.2,7.9,-46.79,3.79,308.0,0.7
2018-06-03 05:24:00,2120.2,9.4,-46.78,4.07,308.0,0.3
2018-06-03 05:44:00,2133.2,5.0,-46.62,3.98,308.0,0.3
2018-06-03 06:05:00,2125.7,4.0,-46.4,3.91,264.0,1.0
2018-06-03 06:20:00,2129.6,2.3,-46.55,4.16,220.0,0.7
2018-06-03 08:14:00,2153.9,68.1,-46.17,4.08,220.0,1.0
2018-06-03 08:35:00,2144.8,63.7,-46.56,4.07,176.0,0.3
2018-06-03 08:54:00,2073.9,14.4,-46.41,4.0,220.0,1.0
2018-06-03 09:14:00,2046.6,18.2,-46.51,4.27,132.0,0.7
2018-06-03 09:34:00,2036.3,38.4,-46.54,4.38,0.0,1.0
2018-06-03 09:55:00,1999.4,11.3,-46.66,4.35,308.0,0.3
2018-06-03 10:15:00,1982.2,5.6,-46.6,4.64,220.0,1.7
2018-06-03 10:34:00,1977.0,5.8,-46.71,4.08,nan,1.0
2018-06-03 10:55:00,1977.5,7.5,-46.7,4.22,220.0,0.3
2018-06-03 11:14:00,1978.4,13.3,-46.9,4.25,198.0,1.7
2018-06-03 11:34:00,2019.9,59.9,-46.63,4.03,176.0,2.0
2018-06-03 11:55:00,1967.6,25.5,-46.58,4.22,88.0,2.0
2018-06-03 12:15:00,1962.3,5.5,-47.12,4.3,0.0,0.7
2018-06-03 12:34:00,1964.9,9.0,-46.88,4.45,176.0,2.4
2018-06-03 12:55:00,1968.8,4.6,-47.2,4.22,220.0,1.0
2018-06-03 13:15:00,1972.6,7.5,-46.53,4.01,308.0,1.4
2018-06-03 13:35:00,1978.4,11.8,-47.19,4.21,220.0,2.4
2018-06-03 13:55:00,1985.2,16.7,-46.78,4.26,88.0,2.0
2018-06-03 14:14:00,1983.6,17.6,-46.96,4.36,88.0,1.0
2018-06-03 14:34:00,2004.1,27.3,-46.74,4.36,nan,2.4
2018-06-03 14:55:00,1991.3,5.4,-47.11,4.35,220.0,0.7
2018-06-03 15:14:00,1991.7,7.1,-46.86,4.26,0.0,1.0
2018-06-03 15:34:00,1993.4,25.4,-46.86,3.98,0.0,2.7
2018-06-03 15:54:00,2049.2,33.7,-46.4,3.84,0.0,2.0
2018-06-03 16:14:00,2092.8,56.3,-46.66,4.13,88.0,4.1
2018-06-03 16:34:00,2030.3,16.7,-47.32,4.56,88.0,4.1
2018-06-03 16:54:00,2028.3,7.3,-47.49,4.39,88.0,3.4
2018-06-03 17:15:00,2030.2,6.0,-47.78,3.99,88.0,2.4
2018-06-03 17:35:00,2029.0,16.1,-47.18,4.46,110.0,3.1
2018-06-03 17:50:00,2064.2,30.6,-47.02,4.47,nan,3.4
2018-06-03 19:46:00,2077.0,27.4,-47.16,3.92,132.0,3.7
2018-06-03 20:06:00,2079.2,25.1,-47.01,4.02,88.0,2.0
2018-06-03 20:26:00,2087.6,10.4,-47.54,3.91,88.0,2.4
2018-06-03 20:45:00,2116.7,12.6,-47.84,4.18,88.0,3.4
2018-06-03 21:05:00,2095.4,8.9,-48.04,4.12,308.0,1.7
2018-06-03 21:25:00,2114.1,22.0,-47.84,3.86,88.0,2.0
2018-06-03 21:45:00,2156.8,20.3,-47.64,3.88,176.0,2.0
2018-06-03 22:05:00,2113.2,14.8,-47.48,3.88,88.0,1.7
2018-06-03 22:26:00,2155.3,14.0,-48.3,4.1,132.0,2.4
2018-06-03 22:46:00,2234.0,23.7,-47.84,3.79,88.0,2.0
2018-06-03 23:06:00,2231.2,9.7,-48.33,3.77,154.0,1.4
2018-06-03 23:26:00,2224.5,9.8,-47.99,3.82,88.0,1.0
2018-06-03 23:46:00,2218.7,8.6,-47.74,3.68,308.0,1.7
2018-06-04 00:05:00,2229.8,10.8,-48.05,3.68,132.0,1.0
2018-06-04 00:26:00,2229.0,5.4,-48.11,3.83,88.0,1.7
2018-06-04 00:45:00,2206.1,12.8,-47.31,3.57,286.0,1.4
2018-06-04 01:05:00,2153.2,12.4,-47.79,4.05,132.0,1.0
2018-06-04 01:25:00,2137.6,6.5,-47.71,3.97,88.0,1.4
2018-06-04 01:46:00,2146.1,10.0,-47.75,3.78,110.0,1.7
2018-06-04 02:06:00,2135.8,3.4,-47.84,4.04,132.0,1.7
2018-06-04 02:25:00,2135.9,8.5,-47.28,3.7,88.0,2.4
2018-06-04 02:45:00,2146.1,9.6,-46.61,3.78,88.0,0.3
2018-06-04 03:05:00,2138.1,3.3,-47.36,3.78,88.0,3.1
2018-06-04 03:26:00,2155.3,15.1,-47.27,4.05,132.0,1.7
2018-06-04 03:45:00,2172.5,32.2,-46.52,3.83,0.0,3.1
2018-06-04 04:05:00,2157.6,45.0,-46.67,4.05,264.0,3.1
2018-06-04 04:25:00,2129.8,38.8,-47.38,4.09,0.0,1.0
2018-06-04 04:45:00,2119.2,33.8,-47.11,3.82,nan,3.4
2018-06-04 05:06:00,2139.0,43.1,-46.86,4.07,22.0,1.0
2018-06-04 05:26:00,2133.0,51.5,-46.65,4.06,132.0,2.0
2018-06-04 05:45:00,2080.3,27.2,-47.32,4.17,132.0,1.0
2018-06-04 06:05:00,2070.9,5.7,-47.12,4.16,308.0,2.0
2018-06-04 06:21:00,2101.0,30.1,-47.3,4.32,132.0,1.7
2018-06-04 08:15:00,2082.0,2.6,-47.07,4.08,308.0,1.0
2018-06-04 08:35:00,2077.8,14.0,-47.58,4.33,88.0,2.0
2018-06-04 08:55:00,2028.5,11.3,-47.19,4.4,0.0,2.4
2018-06-04 09:15:00,2016.1,1.6,-47.77,4.25,0.0,1.7
2018-06-04 09:35:00,2013.6,5.1,-47.67,4.44,44.0,0.3
2018-06-04 09:55:00,2004.8,6.0,-47.36,4.14,308.0,1.0
2018-06-04 10:15:00,2001.5,2.7,-47.45,4.39,0.0,1.7
2018-06-04 10:35:00,2008.3,4.3,-47.39,4.45,198.0,1.0
2018-06-04 10:55:00,2008.6,5.5,-47.24,3.94,308.0,1.7
2018-06-04 11:15:00,2012.7,8.2,-47.25,3.97,132.0,2.7
2018-06-04 11:36:00,2000.7,4.9,-47.46,4.12,154.0,3.1
2018-06-04 11:55:00,2001.4,7.5,-47.41,4.5,308.0,0.7
2018-06-04 12:15:00,2003.7,12.5,-47.96,4.45,88.0,2.7
2018-06-04 12:36:00,2000.4,2.9,-46.38,4.14,0.0,1.7
2018-06-04 12:55:00,2013.7,22.0,-47.01,3.94,308.0,3.7
2018-06-04 13:15:00,1994.0,2.1,-47.05,4.04,0.0,2.4
2018-06-04 13:36:00,2008.5,30.4,-46.9,4.4,88.0,3.1
2018-06-04 13:56:00,1998.8,8.9,-46.73,3.91,308.0,3.1
2018-06-04 14:16:00,1995.1,11.0,-46.87,4.16,0.0,2.4
2018-06-04 14:36:00,1987.0,2.1,-46.54,4.38,132.0,2.4
2018-06-04 14:56:00,1990.5,4.8,-46.87,4.17,308.0,1.7
2018-06-04 15:16:00,1995.7,5.2,-46.79,4.08,0.0,2.7
2018-06-04 15:36:00,1998.9,6.0,-46.58,4.6,nan,2.4
2018-06-04 15:55:00,2000.9,4.2,-47.18,4.19,154.0,1.4
2018-06-04 16:15:00,1990.1,2.5,-47.53,4.14,0.0,4.1
2018-06-04 16:36:00,1991.9,1.9,-47.38,4.48,88.0,1.0
2018-06-04 16:55:00,1996.9,4.0,-47.17,4.57,0.0,1.0
2018-06-04 17:15:00,1996.9,3.4,-47.02,4.26,88.0,2.7
2018-06-04 17:35:00,1995.4,2.1,-47.09,4.25,264.0,1.7
2018-06-04 17:51:00,2002.0,1.8,-46.22,4.4,330.0,2.7
2018-06-04 19:46:00,1997.7,7.0,-47.05,4.29,0.0,0.7
2018-06-04 20:07:00,1987.9,3.7,-46.71,4.31,0.0,2.0
2018-06-04 20:27:00,1985.5,2.7,-46.68,4.39,0.0,4.1
2018-06-04 20:46:00,1979.1,3.2,-46.99,4.32,264.0,2.7
2018-06-04 21:06:00,1985.3,6.7,-46.93,4.31,88.0,2.0
2018-06-04 21:26:00,1978.4,3.2,-46.85,4.11,88.0,2.7
2018-06-04 21:47:00,1979.7,2.5,-47.4,4.42,0.0,2.7
2018-06-04 22:06:00,1982.4,3.8,-47.52,4.26,0.0,3.4
2018-06-04 22:27:00,2030.2,63.7,-46.11,4.13,88.0,5.4
2018-06-04 22:47:00,2011.3,57.4,-47.2,4.42,264.0,1.4
2018-06-04 23:07:00,1969.9,2.4,-47.03,4.3,0.0,4.1
2018-06-04 23:26:00,2041.9,99.7,-46.25,4.32,308.0,4.8
2018-06-04 23:46:00,1975.0,23.9,-46.52,4.11,308.0,3.4
2018-06-05 00:06:00,1998.1,65.7,-46.52,4.4,0.0,1.0
2018-06-05 00:26:00,1964.9,10.1,-47.17,4.43,308.0,3.1
2018-06-05 00:47:00,2040.3,63.1,-46.31,4.02,308.0,6.8
2018-06-05 01:06:00,1983.1,39.4,-46.96,4.11,286.0,2.0
2018-06-05 01:26:00,1977.8,21.2,-46.57,4.14,0.0,3.4
2018-06-05 01:47:00,1973.8,24.3,-46.46,3.98,308.0,4.1
2018-06-05 02:07:00,2048.0,62.3,-46.0,4.02,88.0,4.1
2018-06-05 02:27:00,2032.2,61.8,-46.43,4.45,308.0,2.4
2018-06-05 02:47:00,2027.7,44.8,-46.25,3.92,264.0,2.7
2018-06-05 03:06:00,1984.9,36.2,-47.13,4.09,264.0,4.8
2018-06-05 03:26:00,1979.1,15.5,-46.75,4.14,308.0,0.7
2018-06-05 03:47:00,1968.5,19.1,-47.26,4.01,0.0,3.4
2018-06-05 04:07:00,1968.0,11.4,-46.88,4.12,110.0,3.1
2018-06-05 04:27:00,2002.0,34.8,-46.7,4.24,nan,1.7
2018-06-05 04:46:00,2063.3,60.6,-45.75,3.72,264.0,2.7
2018-06-05 05:07:00,2032.2,26.5,-46.61,4.21,88.0,2.0
2018-06-05 05:26:00,2028.9,49.1,-46.38,4.4,88.0,3.4
2018-06-05 05:46:00,2006.3,64.2,-46.92,3.78,0.0,2.7
2018-06-05 06:07:00,1988.0,36.6,-46.38,4.02,88.0,3.4
2018-06-05 06:22:00,2058.1,62.7,-46.11,4.48,0.0,3.1
2018-06-05 08:17:00,1951.2,5.3,-47.05,4.28,308.0,4.4
2018-06-05 08:37:00,1961.6,14.9,-46.55,4.4,308.0,2.4
2018-06-05 08:57:00,2002.0,87.4,-46.69,4.0,0.0,3.7
2018-06-05 09:16:00,2029.6,98.8,-46.32,4.22,88.0,4.1
2018-06-05 09:36:00,1986.7,39.8,-46.88,3.93,308.0,3.7
2018-06-05 09:57:00,1966.8,36.3,-47.26,4.32,132.0,3.4
2018-06-05 10:16:00,1969.9,32.0,-47.22,4.09,264.0,3.4
2018-06-05 10:37:00,2038.3,54.7,-46.56,4.24,88.0,3.7
2018-06-05 10:57:00,1974.0,22.3,-47.1,4.27,264.0,4.1
2018-06-05 11:17:00,1959.3,8.2,-47.03,4.22,nan,2.4
2018-06-05 11:36:00,1998.9,130.1,-46.96,4.43,nan,4.4
2018-06-05 11:56:00,2050.6,86.0,-46.5,4.33,nan,4.4
2018-06-05 12:17:00,2012.3,120.0,-46.52,4.03,0.0,4.1
2018-06-05 12:37:00,1944.2,2.7,-47.1,4.11,nan,3.4
2018-06-05 12:56:00,1987.1,55.1,-46.99,4.34,nan,3.1
2018-06-05 13:16:00,1995.0,84.1,-47.05,4.2,308.0,1.7
2018-06-05 13:36:00,1982.3,59.8,-46.75,4.43,nan,5.4
2018-06-05 13:56:00,1979.2,69.5,-46.67,4.16,nan,3.7
2018-06-05 14:16:00,2063.4,95.2,-46.38,4.1,nan,3.1
2018-06-05 14:37:00,1958.3,22.3,-47.43,4.24,nan,2.4
2018-06-05 14:56:00,1987.2,98.6,-47.26,4.14,220.0,3.4
2018-06-05 15:16:00,2073.8,83.9,-46.8,4.08,88.0,1.4
2018-06-05 15:36:00,1989.6,54.6,-47.3,4.14,88.0,1.7
2018-06-05 15:56:00,1965.3,32.1,-47.67,4.59,nan,2.7
2018-06-05 16:16:00,1949.8,11.6,-46.87,4.33,0.0,2.4
2018-06-05 16:37:00,1945.0,3.6,-47.56,4.28,0.0,4.1
2018-06-05 16:56:00,1952.7,10.9,-47.35,4.42,88.0,2.7
2018-06-05 17:16:00,1944.8,4.0,-47.57,4.47,88.0,3.4
2018-06-05 17:36:00,1944.6,3.1,-47.96,4.67,308.0,3.4
2018-06-05 17:52:00,1945.6,2.0,-48.27,4.05,308.0,2.0
2018-06-05 19:48:00,1961.4,3.9,-47.83,4.31,264.0,1.7
2018-06-05 20:08:00,1959.5,6.0,-47.54,4.31,264.0,4.1
2018-06-05 20:28:00,1958.1,5.0,-47.66,4.39,308.0,2.4
2018-06-05 20:47:00,1967.2,3.7,-47.67,4.15,0.0,2.7
2018-06-05 21:07:00,1966.4,3.0,-47.21,4.36,198.0,2.0
2018-06-05 21:27:00,1970.1,4.1,-47.47,4.12,308.0,2.0
2018-06-05 21:47:00,1976.5,2.7,-47.59,4.2,132.0,4.4
2018-06-05 22:07:00,1978.7,2.2,-47.75,4.06,0.0,1.4
2018-06-05 22:27:00,1980.2,2.8,-47.11,4.02,88.0,2.7
2018-06-05 22:48:00,1980.5,6.2,-47.37,4.11,308.0,2.4
2018-06-05 23:08:00,1972.4,3.0,-47.32,4.28,330.0,3.4
2018-06-05 23:28:00,2022.1,40.4,-47.34,4.14,308.0,3.1
2018-06-05 23:47:00,1996.8,35.2,-46.95,4.07,220.0,2.7
2018-06-06 00:07:00,2007.7,38.8,-46.99,4.07,88.0,3.1
2018-06-06 00:28:00,2001.9,39.3,-46.99,3.9,88.0,1.7
2018-06-06 00:47:00,2003.7,50.9,-47.12,3.9,110.0,5.1
2018-06-06 01:08:00,2053.3,86.8,-47.09,4.32,308.0,4.8
2018-06-06 01:28:00,2015.0,42.0,-47.04,4.0,132.0,2.4
2018-06-06 01:47:00,1991.7,26.3,-46.84,4.21,330.0,4.1
2018-06-06 02:07:00,1989.1,26.9,-47.49,3.95,330.0,2.7
2018-06-06 02:27:00,1995.3,28.1,-46.88,4.24,308.0,1.7
2018-06-06 02:47:00,1976.2,21.2,-47.35,4.17,88.0,4.4
2018-06-06 03:07:00,1987.7,20.9,-47.37,4.2,88.0,2.0
2018-06-06 03:28:00,1979.9,12.5,-47.25,4.23,88.0,2.4
2018-06-06 03:48:00,1982.5,13.9,-46.97,4.18,88.0,3.7
2018-06-06 04:08:00,1991.7,11.3,-47.1,4.09,308.0,2.4
2018-06-06 04:27:00,1976.2,7.8,-47.05,3.97,308.0,3.4
2018-06-06 04:47:00,2003.6,45.7,-47.09,4.06,88.0,4.4
2018-06-06 05:08:00,1965.0,7.2,-47.2,4.13,0.0,4.4
2018-06-06 05:28:00,1962.1,4.0,-47.1,3.97,264.0,2.7
2018-06-06 05:48:00,1961.8,1.9,-47.27,4.38,264.0,1.4
2018-06-06 06:07:00,1958.9,1.8,-47.33,4.09,0.0,2.0
2018-06-06 06:23:00,1957.4,1.6,-47.53,4.08,0.0,2.0
2018-06-06 08:18:00,1968.9,11.2,-46.51,4.14,nan,2.0
2018-06-06 08:38:00,1971.8,10.9,-46.96,4.35,nan,2.7
2018-06-06 08:57:00,1986.2,23.3,-46.95,4.07,0.0,2.7
2018-06-06 09:17:00,2008.8,43.2,-46.96,3.91,nan,2.4
2018-06-06 09:37:00,1983.8,23.7,-47.14,4.13,0.0,2.7
2018-06-06 09:57:00,1973.4,1.7,-47.08,4.17,110.0,3.4
2018-06-06 10:17:00,1981.6,14.5,-46.89,4.2,88.0,1.0
2018-06-06 10:37:00,1995.8,53.7,-47.17,3.88,nan,3.1
2018-06-06 10:57:00,1966.1,8.7,-46.92,4.12,0.0,2.7
2018-06-06 11:17:00,1979.3,40.8,-46.7,4.34,0.0,2.0
2018-06-06 11:38:00,1969.5,20.2,-47.04,4.42,nan,2.4
2018-06-06 11:58:00,1992.0,60.8,-46.42,4.32,132.0,4.4
2018-06-06 12:17:00,2008.0,40.7,-46.19,3.96,88.0,4.1
2018-06-06 12:38:00,1950.0,4.3,-47.17,4.01,0.0,2.4
2018-06-06 12:58:00,1963.6,26.7,-47.04,4.11,0.0,3.7
2018-06-06 13:18:00,1957.3,9.8,-46.92,4.04,0.0,1.4
2018-06-06 13:38:00,1954.4,7.8,-47.22,4.31,88.0,2.7
2018-06-06 13:57:00,1993.4,71.7,-46.62,4.34,0.0,3.4
2018-06-06 14:18:00,1954.1,3.5,-47.32,4.37,308.0,3.1
2018-06-06 14:37:00,2000.8,75.0,-46.45,4.12,nan,3.7
2018-06-06 14:57:00,1961.4,13.7,-46.74,4.07,0.0,2.0
2018-06-06 15:18:00,1987.7,49.5,-46.61,4.32,110.0,1.7
2018-06-06 15:38:00,1982.8,52.3,-46.93,4.03,0.0,1.4
2018-06-06 15:57:00,1994.4,51.6,-46.71,4.39,132.0,2.7
2018-06-06 16:17:00,2043.0,78.3,-45.87,4.18,nan,3.1
2018-06-06 16:38:00,2017.2,47.4,-46.67,4.25,88.0,3.7
2018-06-06 16:57:00,2028.9,64.6,-46.37,4.17,330.0,2.0
2018-06-06 17:17:00,2031.0,76.6,-46.53,4.31,88.0,2.0
2018-06-06 17:37:00,1996.5,49.5,-46.48,3.9,nan,3.4
2018-06-06 17:53:00,2006.5,21.3,-46.49,4.11,nan,3.4
2018-06-06 19:48:00,2107.6,43.4,-46.57,4.15,264.0,1.7
2018-06-06 20:08:00,2128.7,47.5,-46.7,4.02,0.0,2.7
2018-06-06 20:29:00,2079.7,76.5,-46.69,4.07,110.0,1.4
2018-06-06 20:48:00,2005.1,23.3,-46.83,4.44,176.0,2.0
2018-06-06 21:09:00,2022.0,25.0,-47.13,4.09,88.0,3.7
2018-06-06 21:29:00,2005.4,12.1,-47.26,4.43,264.0,2.4
2018-06-06 21:49:00,1997.4,11.2,-46.73,3.99,132.0,1.7
2018-06-06 22:08:00,2001.3,16.3,-46.99,4.57,88.0,2.0
2018-06-06 22:29:00,1984.0,3.9,-46.99,4.27,0.0,2.4
2018-06-06 22:48:00,1977.2,1.9,-47.02,4.23,88.0,2.7
2018-06-06 23:08:00,2016.8,55.8,-46.96,4.05,0.0,4.1
2018-06-06 23:29:00,1968.8,8.2,-47.4,4.25,264.0,3.1
2018-06-06 23:48:00,2057.5,99.2,-46.93,4.11,88.0,4.1
2018-06-07 00:08:00,1988.5,27.2,-46.9,4.65,88.0,3.4
2018-06-07 00:29:00,2006.6,31.7,-46.85,4.5,110.0,1.0
2018-06-07 00:49:00,2036.9,52.3,-46.1,4.31,88.0,5.4
2018-06-07 01:09:00,1962.3,30.3,-46.97,4.53,88.0,0.7
2018-06-07 01:28:00,1948.2,2.9,-47.22,4.46,110.0,2.0
2018-06-07 01:49:00,1956.7,12.3,-47.07,4.27,308.0,3.4
2018-06-07 02:08:00,1994.4,43.6,-46.31,4.26,308.0,4.4
2018-06-07 02:28:00,1994.6,38.1,-46.71,4.47,132.0,2.4
2018-06-07 02:49:00,1968.8,40.9,-47.14,4.24,308.0,2.7
2018-06-07 03:08:00,1953.3,7.0,-47.0,4.38,308.0,1.0
2018-06-07 03:28:00,1961.3,4.2,-46.88,4.22,88.0,1.4
2018-06-07 03:48:00,2020.1,41.0,-46.02,4.09,330.0,2.4
2018-06-07 04:08:00,1964.1,1.7,-46.71,4.06,0.0,1.0
2018-06-07 04:28:00,1963.9,3.8,-47.05,4.05,308.0,2.4
2018-06-07 04:48:00,1958.0,3.2,-47.07,4.34,308.0,1.4
2018-06-07 05:09:00,1953.1,5.3,-46.89,4.12,330.0,2.4
2018-06-07 05:29:00,1967.6,2.6,-47.08,4.24,308.0,2.7
2018-06-07 05:48:00,1963.2,1.7,-47.17,4.1,0.0,3.1
2018-06-07 06:09:00,1965.4,1.7,-46.93,4.26,0.0,2.4
2018-06-07 06:24:00,1967.4,2.9,-46.82,3.76,264.0,2.7
2018-06-07 08:19:00,1964.8,22.3,-46.57,3.95,0.0,2.7
2018-06-07 08:38:00,1962.3,11.6,-46.59,4.48,0.0,2.4
2018-06-07 08:58:00,1969.4,24.1,-47.01,4.23,0.0,2.0
2018-06-07 09:19:00,1985.4,26.0,-46.43,4.12,0.0,3.7
2018-06-07 09:38:00,1964.5,3.7,-46.85,4.25,nan,1.0
2018-06-07 09:58:00,1974.3,16.7,-47.32,4.11,88.0,1.7
2018-06-07 10:19:00,1983.0,40.2,-46.52,4.01,0.0,1.0
2018-06-07 10:39:00,2006.7,65.2,-46.47,3.89,nan,3.4
2018-06-07 10:59:00,1966.5,7.9,-46.14,4.14,132.0,1.0
2018-06-07 11:18:00,1973.2,13.4,-47.05,4.34,0.0,1.0
2018-06-07 11:38:00,2002.9,51.0,-46.6,4.16,nan,1.7
2018-06-07 11:58:00,1986.8,24.3,-46.6,4.21,88.0,1.7
2018-06-07 12:18:00,2013.2,46.3,-46.69,4.04,0.0,3.7
2018-06-07 12:38:00,2025.2,65.4,-46.55,4.49,0.0,1.0
2018-06-07 12:58:00,2005.1,57.1,-46.39,4.18,88.0,3.4
2018-06-07 13:18:00,1990.2,29.6,-46.36,4.23,nan,1.4
2018-06-07 13:38:00,2001.0,51.4,-46.48,3.98,264.0,1.4
2018-06-07 15:09:00,1984.5,8.5,-46.32,4.26,88.0,1.0
2018-06-07 15:30:00,1990.3,12.8,-46.78,4.21,132.0,2.0
2018-06-07 15:50:00,2050.8,50.6,-46.99,3.61,0.0,1.7
2018-06-07 16:10:00,2011.5,42.6,-47.54,3.88,88.0,0.7
2018-06-07 16:29:00,1989.7,17.9,-47.19,3.95,264.0,1.4
2018-06-07 16:45:00,2002.9,14.6,-47.08,4.29,nan,1.7
2018-06-07 18:39:00,2023.3,38.2,-46.72,4.19,308.0,2.4
2018-06-07 18:59:00,1975.0,5.7,-46.91,4.17,88.0,3.1
2018-06-07 19:19:00,1972.4,1.2,-46.26,4.42,330.0,4.1
2018-06-07 19:39:00,2007.5,40.5,-46.35,3.98,44.0,2.7
2018-06-07 20:00:00,2063.1,55.5,-46.19,3.91,88.0,3.1
2018-06-07 20:20:00,2079.3,50.6,-46.22,4.01,132.0,1.4
2018-06-07 20:39:00,2032.3,14.2,-46.82,4.08,88.0,2.0
2018-06-07 21:00:00,2045.4,11.3,-46.42,4.11,132.0,1.7
2018-06-07 21:20:00,2033.5,7.4,-46.15,4.42,132.0,3.1
2018-06-07 21:39:00,2033.2,10.1,-46.05,4.3,88.0,1.7
2018-06-07 21:59:00,2014.2,7.3,-45.77,4.09,132.0,1.7
2018-06-07 22:19:00,1994.2,9.5,-45.75,4.37,308.0,3.4
2018-06-07 22:40:00,2008.8,22.2,-46.19,4.26,88.0,3.1
2018-06-07 23:00:00,2046.2,36.5,-45.28,3.73,308.0,2.0
2018-06-07 23:19:00,2052.8,16.8,-45.69,4.24,0.0,4.4
2018-06-07 23:40:00,2020.7,14.4,-45.9,4.06,88.0,2.4
2018-06-08 00:00:00,1992.6,5.4,-45.57,4.1,264.0,1.7
2018-06-08 00:20:00,1989.3,3.8,-46.19,4.37,88.0,2.4
2018-06-08 00:40:00,1999.6,9.3,-45.66,4.27,88.0,1.4
2018-06-08 01:00:00,1981.0,5.0,-45.84,4.5,0.0,1.0
2018-06-08 01:20:00,1989.3,11.2,-46.28,4.09,88.0,1.0
2018-06-08 01:40:00,1995.0,5.3,-45.95,3.91,132.0,1.0
2018-06-08 02:00:00,1991.9,8.0,-46.06,4.04,0.0,1.4
2018-06-08 02:19:00,1977.3,2.4,-45.85,4.19,264.0,1.4
2018-06-08 02:40:00,1976.5,7.6,-46.27,4.08,330.0,1.4
2018-06-08 02:59:00,1984.1,5.3,-46.18,4.03,264.0,1.7
2018-06-08 03:19:00,2021.3,25.6,-45.55,4.1,0.0,4.1
2018-06-08 03:39:00,2080.7,36.1,-44.83,3.83,264.0,2.4
2018-06-08 04:00:00,2034.0,68.6,-45.33,4.12,264.0,4.1
2018-06-08 04:20:00,1988.0,54.4,-45.85,4.33,264.0,1.7
2018-06-08 04:40:00,2028.5,43.3,-46.05,4.1,88.0,1.7
2018-06-08 05:00:00,2061.6,62.4,-45.47,4.05,0.0,3.1
2018-06-08 05:15:00,2068.4,43.5,-45.68,4.08,132.0,3.4
2018-06-08 07:10:00,2070.2,72.7,-45.53,3.98,264.0,2.0
2018-06-08 07:29:00,2017.6,78.9,-46.23,4.12,264.0,2.7
2018-06-08 07:50:00,2049.1,37.5,-45.89,4.13,132.0,1.0
2018-06-08 08:09:00,1987.1,26.2,-45.85,3.99,nan,1.4
2018-06-08 08:29:00,1963.0,3.2,-46.1,4.3,0.0,1.7
2018-06-08 08:49:00,1972.4,10.9,-46.12,4.5,88.0,2.4
2018-06-08 09:10:00,1988.7,52.3,-46.32,4.37,nan,1.7
2018-06-08 09:30:00,1964.5,3.4,-46.2,4.43,nan,1.7
2018-06-08 09:49:00,1962.4,2.6,-46.4,4.24,0.0,3.1
2018-06-08 10:04:00,1965.0,4.1,-46.23,4.4,88.0,3.1
2018-06-08 11:27:00,1991.9,39.2,-46.22,4.29,0.0,1.7
2018-06-08 11:47:00,1975.8,33.0,-46.2,4.22,88.0,2.7
2018-06-08 12:07:00,1965.3,4.1,-46.59,4.5,220.0,1.0
2018-06-08 12:26:00,1968.7,6.4,-46.38,4.22,308.0,3.7
2018-06-08 12:47:00,1980.6,23.9,-46.15,4.2,0.0,2.0
2018-06-08 13:02:00,1981.2,11.4,-46.29,4.48,nan,1.7
2018-06-08 14:31:00,2013.1,17.2,-46.0,4.15,nan,1.7
2018-06-08 14:50:00,2037.7,48.1,-46.48,4.21,308.0,2.4
2018-06-08 15:10:00,2016.1,17.5,-45.86,4.23,286.0,1.4
2018-06-08 15:30:00,2015.6,15.4,-46.57,4.3,176.0,0.7
2018-06-08 15:51:00,2010.6,3.1,-46.1,4.32,154.0,1.7
2018-06-08 16:06:00,2004.8,3.5,-46.34,4.57,0.0,1.7
2018-06-08 18:01:00,2043.4,68.4,-45.97,4.22,264.0,4.4
2018-06-08 18:21:00,1998.8,7.4,-46.42,4.32,264.0,2.0
2018-06-08 18:41:00,2049.7,67.5,-46.13,3.99,88.0,4.4
2018-06-08 19:01:00,2035.4,37.0,-46.31,4.32,0.0,2.0
2018-06-08 19:20:00,1999.8,36.9,-46.21,4.51,0.0,2.0
2018-06-08 19:40:00,2013.9,34.1,-45.92,4.15,264.0,2.4
2018-06-08 20:01:00,2102.4,49.1,-46.29,3.94,308.0,0.7
2018-06-08 20:21:00,2108.0,20.7,-46.1,3.82,308.0,3.1
2018-06-08 20:40:00,2159.2,75.7,-45.26,3.84,308.0,2.4
2018-06-08 21:00:00,2105.5,77.6,-45.71,3.88,220.0,2.0
2018-06-08 21:20:00,2068.5,26.3,-46.17,4.1,132.0,2.0
2018-06-08 21:40:00,2054.0,48.9,-46.04,4.12,308.0,2.4
2018-06-08 22:01:00,2052.7,19.8,-45.95,4.05,176.0,2.7
2018-06-08 22:20:00,2058.1,8.0,-46.49,4.07,88.0,2.7
2018-06-08 22:40:00,2039.5,10.5,-45.77,4.2,0.0,2.4
2018-06-08 23:01:00,2022.9,15.8,-46.38,4.43,88.0,3.4
2018-06-08 23:21:00,2031.7,21.7,-45.79,4.36,132.0,2.0
2018-06-08 23:40:00,2005.2,12.3,-46.35,4.28,88.0,1.7
2018-06-09 00:00:00,1998.9,10.4,-45.47,3.94,132.0,2.7
2018-06-09 00:21:00,2008.5,31.6,-46.38,4.09,220.0,1.4
2018-06-09 00:40:00,1978.7,13.5,-45.94,4.41,330.0,2.0
2018-06-09 01:00:00,1982.1,18.2,-45.84,4.35,264.0,0.7
2018-06-09 01:21:00,1985.3,20.6,-45.75,4.33,132.0,2.7
2018-06-09 01:41:00,1985.0,5.8,-45.91,4.22,0.0,1.7
2018-06-09 02:01:00,1973.4,4.2,-46.66,4.34,264.0,1.0
2018-06-09 02:20:00,1974.4,7.3,-46.17,4.41,176.0,1.7
2018-06-09 02:41:00,1972.5,9.3,-46.13,4.47,0.0,2.4
2018-06-09 03:00:00,1978.1,22.4,-46.44,4.32,88.0,3.4
2018-06-09 03:21:00,1973.9,4.1,-46.37,4.31,0.0,1.4
2018-06-09 03:41:00,1971.6,5.2,-46.11,4.37,308.0,2.4
2018-06-09 04:00:00,1982.5,7.8,-46.81,4.22,264.0,1.4
2018-06-09 04:20:00,1991.3,4.5,-46.27,4.11,88.0,1.4
2018-06-09 04:36:00,1978.4,5.5,-46.33,4.36,264.0,1.7
2018-06-09 06:30:00,2016.9,42.2,-45.94,4.46,0.0,2.0
2018-06-09 06:50:00,1991.4,22.9,-46.34,4.47,88.0,1.4
2018-06-09 07:11:00,1998.3,46.5,-46.31,4.15,88.0,2.0
2018-06-09 07:31:00,1979.0,34.1,-46.21,4.11,264.0,1.7
2018-06-09 07:50:00,2036.4,39.5,-45.98,4.19,264.0,2.4
2018-06-09 08:11:00,1986.9,29.9,-46.67,3.97,264.0,3.1
2018-06-09 08:31:00,1987.7,28.0,-46.39,4.29,110.0,1.7
2018-06-09 08:50:00,1973.9,8.1,-46.36,4.24,0.0,2.4
2018-06-09 09:10:00,1961.1,2.0,-46.68,4.23,264.0,2.7
2018-06-09 09:30:00,1966.7,2.0,-46.24,4.27,176.0,1.7
2018-06-09 09:51:00,1968.3,6.1,-46.49,4.14,88.0,2.7
2018-06-09 10:11:00,1979.5,15.9,-46.11,4.31,308.0,3.1
2018-06-09 10:31:00,1970.7,4.9,-46.64,3.99,264.0,1.7
2018-06-09 10:51:00,2005.9,35.6,-46.26,4.46,nan,3.4
2018-06-09 11:11:00,2016.2,74.1,-45.75,4.25,88.0,2.0
2018-06-09 11:31:00,1999.7,48.1,-45.91,4.25,154.0,1.4
2018-06-09 11:50:00,2023.2,61.7,-45.88,4.28,220.0,2.4
2018-06-09 12:10:00,2012.6,76.3,-46.43,4.27,264.0,2.0
2018-06-09 12:30:00,2031.3,75.1,-45.77,4.21,132.0,0.7
2018-06-09 12:51:00,1991.8,12.7,-46.79,4.23,88.0,1.4
2018-06-09 13:10:00,2008.0,25.3,-46.3,4.19,132.0,1.7
2018-06-09 13:31:00,1993.5,12.0,-46.11,4.12,0.0,2.0
2018-06-09 13:51:00,1987.1,3.8,-45.95,4.54,88.0,1.0
2018-06-09 14:10:00,2004.1,25.3,-46.2,4.04,0.0,0.7
2018-06-09 14:31:00,1997.2,6.1,-46.09,4.29,132.0,0.3
2018-06-09 14:50:00,2025.9,14.7,-45.99,4.16,88.0,1.4
2018-06-09 15:11:00,2011.2,16.2,-45.72,4.08,132.0,2.7
2018-06-09 15:31:00,2035.9,26.3,-46.0,4.32,308.0,1.4
2018-06-09 15:51:00,2058.6,37.0,-46.04,4.06,0.0,2.0
2018-06-09 16:06:00,2026.1,19.5,-46.31,4.16,0.0,2.0
2018-06-09 18:02:00,2036.3,30.3,-46.36,4.18,88.0,4.1
2018-06-09 18:22:00,2025.4,14.2,-46.63,4.02,264.0,1.7
2018-06-09 18:41:00,2052.0,27.8,-46.19,3.88,308.0,1.7
2018-06-09 19:01:00,2042.5,24.1,-46.5,4.08,132.0,2.7
2018-06-09 19:22:00,2046.6,18.4,-46.48,4.16,88.0,2.7
2018-06-09 19:41:00,2051.3,22.5,-46.98,3.76,132.0,1.7
2018-06-09 20:01:00,2015.1,7.8,-46.24,4.1,88.0,2.7
2018-06-09 20:22:00,2029.8,14.4,-46.08,4.19,88.0,2.0
2018-06-09 20:41:00,2003.9,13.3,-46.14,4.18,132.0,3.4
2018-06-09 21:02:00,2006.1,15.3,-45.85,4.11,132.0,3.4
2018-06-09 21:22:00,1980.4,4.1,-46.47,3.9,88.0,3.7
2018-06-09 21:41:00,1983.8,7.7,-46.09,3.99,110.0,2.7
2018-06-09 22:02:00,1987.8,6.8,-46.01,4.11,88.0,2.4
2018-06-09 22:21:00,2002.5,4.0,-46.35,4.09,88.0,2.4
2018-06-09 22:41:00,1993.3,2.5,-45.95,4.19,88.0,3.1
2018-06-09 23:02:00,1997.0,6.8,-46.04,4.46,110.0,2.4
2018-06-09 23:22:00,2023.3,33.6,-45.77,4.14,132.0,1.4
2018-06-09 23:41:00,2030.3,12.0,-46.24,4.08,264.0,1.0
2018-06-10 00:01:00,2058.5,8.1,-46.66,4.11,88.0,2.4
2018-06-10 00:21:00,2045.6,26.3,-46.27,4.22,88.0,1.7
2018-06-10 00:42:00,2028.9,16.6,-45.41,4.04,88.0,1.7
2018-06-10 01:01:00,2002.8,7.6,-45.76,4.03,264.0,1.7
2018-06-10 01:22:00,2007.6,3.4,-45.89,4.04,264.0,1.7
2018-06-10 01:41:00,2015.5,13.1,-46.06,3.99,264.0,1.4
2018-06-10 02:02:00,2009.0,20.4,-45.98,4.31,264.0,3.1
2018-06-10 02:22:00,2013.1,16.1,-46.06,4.52,220.0,0.7
2018-06-10 02:42:00,2037.4,60.1,-45.56,4.37,264.0,2.7
2018-06-10 03:02:00,1989.2,5.0,-45.96,4.24,0.0,2.4
2018-06-10 03:21:00,2031.9,32.3,-45.7,4.1,264.0,1.0
2018-06-10 03:41:00,2071.3,43.1,-45.89,4.11,264.0,2.0
2018-06-10 04:02:00,2081.4,38.7,-45.45,4.06,88.0,3.1
2018-06-10 04:22:00,2055.4,25.7,-45.44,4.08,88.0,2.0
2018-06-10 04:37:00,2044.3,14.5,-46.34,3.82,264.0,2.0
2018-06-10 06:32:00,2022.8,19.8,-45.78,4.04,0.0,1.0
2018-06-10 06:52:00,2070.5,47.8,-45.37,3.97,nan,2.4
2018-06-10 07:11:00,2054.2,44.7,-46.01,4.09,88.0,1.7
2018-06-10 07:31:00,2048.6,44.4,-46.11,4.1,0.0,2.7
2018-06-10 07:51:00,1988.1,11.3,-46.11,4.27,308.0,3.7
2018-06-10 08:11:00,1977.5,6.0,-46.17,3.82,264.0,2.0
2018-06-10 08:32:00,2001.0,22.1,-46.14,4.08,132.0,1.0
2018-06-10 08:52:00,2054.9,45.1,-46.19,4.09,132.0,2.0
2018-06-10 09:12:00,2048.0,44.2,-46.12,4.15,132.0,2.7
2018-06-10 09:31:00,2035.0,36.7,-46.14,4.17,0.0,1.7
2018-06-10 09:51:00,1992.8,41.9,-45.69,4.35,88.0,2.4
2018-06-10 10:11:00,2059.8,62.1,-45.68,4.3,88.0,2.4
2018-06-10 10:31:00,1989.4,17.1,-46.24,4.34,176.0,2.4
2018-06-10 10:52:00,2005.8,37.2,-46.02,4.28,308.0,0.7
2018-06-10 11:12:00,1993.0,6.7,-45.71,4.03,0.0,1.0
2018-06-10 11:31:00,2019.8,28.2,-46.08,4.33,0.0,2.4
2018-06-10 11:51:00,2009.2,13.6,-45.87,4.17,88.0,2.0
2018-06-10 12:11:00,2011.0,35.3,-46.1,4.25,nan,3.1
2018-06-10 12:32:00,1992.6,13.2,-46.12,4.14,nan,3.1
2018-06-10 12:52:00,2037.3,35.0,-45.54,4.1,0.0,2.0
2018-06-10 13:11:00,2015.7,50.6,-46.21,4.07,nan,3.1
2018-06-10 13:31:00,2027.8,66.5,-45.99,4.14,88.0,0.7
2018-06-10 13:51:00,2038.3,74.5,-45.7,4.02,0.0,3.7
2018-06-10 14:11:00,2050.5,50.7,-45.2,4.04,nan,3.4
2018-06-10 14:31:00,2027.7,95.7,-46.16,4.21,0.0,3.1
2018-06-10 14:52:00,1983.8,8.2,-46.09,4.27,nan,3.7
2018-06-10 15:12:00,2008.2,24.8,-45.9,4.2,nan,2.7
2018-06-10 15:32:00,2017.3,33.3,-45.61,3.89,0.0,3.7
2018-06-10 15:52:00,2017.0,27.2,-46.0,3.9,nan,4.4
2018-06-10 16:07:00,2006.5,19.4,-46.01,4.4,0.0,2.7
2018-06-10 18:03:00,2022.1,9.7,-45.64,4.21,nan,2.7
2018-06-10 18:23:00,2016.6,9.4,-46.5,3.9,132.0,1.4
2018-06-10 18:43:00,2013.2,7.2,-46.21,4.32,132.0,3.1
2018-06-10 19:03:00,2008.9,11.2,-46.38,4.44,132.0,3.4
2018-06-10 19:23:00,1997.4,4.5,-46.5,4.37,110.0,1.7
2018-06-10 19:42:00,2013.5,9.3,-46.56,4.3,110.0,2.7
2018-06-10 20:02:00,2032.6,10.7,-46.26,3.92,88.0,1.7
2018-06-10 20:23:00,2018.2,12.8,-46.08,3.9,308.0,4.1
2018-06-10 20:42:00,2065.5,18.2,-46.31,4.35,308.0,1.7
2018-06-10 21:02:00,2043.9,37.2,-46.29,4.06,88.0,3.4
2018-06-10 21:22:00,1968.5,7.6,-46.02,4.1,88.0,4.8
2018-06-10 21:42:00,1966.7,9.0,-46.14,3.94,132.0,2.0
2018-06-10 22:03:00,1974.7,4.4,-45.87,4.49,176.0,3.4
2018-06-10 22:22:00,2007.6,17.9,-46.31,4.36,88.0,2.0
2018-06-10 22:43:00,2015.7,12.3,-46.13,4.05,132.0,1.7
2018-06-10 23:03:00,2004.2,13.8,-45.69,4.11,308.0,2.4
2018-06-10 23:22:00,2006.4,12.5,-46.1,4.15,264.0,2.4
2018-06-10 23:43:00,2000.1,19.6,-45.96,4.23,88.0,3.4
2018-06-11 00:02:00,1979.3,26.0,-46.25,4.44,88.0,2.7
2018-06-11 00:23:00,1978.4,7.1,-45.84,4.03,330.0,1.7
2018-06-11 00:42:00,1970.0,9.5,-46.04,4.28,88.0,1.7
2018-06-11 01:03:00,1979.0,14.4,-45.41,4.47,110.0,2.4
2018-06-11 01:23:00,1979.5,33.1,-46.03,4.22,88.0,3.1
2018-06-11 01:42:00,1976.9,40.4,-45.66,4.28,88.0,1.0
2018-06-11 02:03:00,1985.4,22.2,-45.7,4.37,0.0,1.7
2018-06-11 02:23:00,1999.3,32.5,-45.73,4.32,0.0,2.7
2018-06-11 02:42:00,1986.6,24.0,-46.29,4.34,308.0,3.1
2018-06-11 03:02:00,1980.9,10.4,-45.99,4.3,308.0,1.0
2018-06-11 03:23:00,2016.8,13.1,-45.88,4.03,88.0,1.4
2018-06-11 03:42:00,2007.7,22.4,-45.93,4.64,308.0,3.1
2018-06-11 04:03:00,2052.2,27.0,-45.43,4.0,88.0,1.7
2018-06-11 04:22:00,2058.7,21.9,-45.94,4.1,330.0,1.7
2018-06-11 04:38:00,2078.7,20.6,-45.9,4.15,264.0,2.0
2018-06-11 06:33:00,2048.0,29.5,-45.79,4.1,88.0,1.4
2018-06-11 06:53:00,2040.1,41.9,-46.03,3.74,88.0,2.7
2018-06-11 07:13:00,1984.6,11.4,-46.33,4.56,88.0,1.7
2018-06-11 07:33:00,2014.2,36.2,-46.86,4.13,nan,2.0
2018-06-11 07:52:00,1997.5,24.0,-46.21,4.53,308.0,2.0
2018-06-11 08:13:00,2019.6,39.5,-46.06,4.03,0.0,3.1
2018-06-11 08:33:00,2012.8,22.2,-46.59,4.37,88.0,2.0
2018-06-11 08:52:00,1986.7,22.4,-46.02,4.45,88.0,1.7
2018-06-11 09:12:00,1977.9,15.3,-46.47,4.27,0.0,2.0
2018-06-11 09:32:00,2000.1,29.5,-46.06,4.12,nan,2.4
2018-06-11 09:52:00,1994.5,29.3,-46.32,4.4,308.0,1.7
2018-06-11 10:13:00,2057.8,47.9,-45.63,4.03,88.0,4.1
2018-06-11 10:33:00,2014.6,32.1,-46.21,3.83,132.0,3.1
2018-06-11 10:53:00,2049.7,71.4,-46.14,3.97,nan,4.8
2018-06-11 11:13:00,2011.8,37.2,-45.9,3.81,88.0,3.1
2018-06-11 11:33:00,1960.4,9.7,-46.61,4.44,132.0,3.7
2018-06-11 11:52:00,1963.6,29.4,-46.84,4.62,88.0,3.4
2018-06-11 12:13:00,1982.3,57.1,-46.24,4.17,nan,5.1
2018-06-11 12:33:00,1991.9,82.0,-46.27,4.38,88.0,5.8
2018-06-11 12:53:00,1958.9,39.7,-46.52,4.06,nan,2.7
2018-06-11 13:12:00,2002.6,52.9,-45.93,4.41,88.0,6.1
2018-06-11 13:33:00,1965.7,45.8,-46.3,4.28,88.0,3.7
2018-06-11 13:50:00,1984.5,54.9,-46.52,4.52,88.0,3.1
2018-06-11 16:03:00,1999.1,46.7,-45.98,4.34,132.0,2.7
2018-06-11 16:22:00,1967.7,30.8,-46.81,4.28,88.0,4.8
2018-06-11 16:42:00,1955.3,23.6,-46.81,4.42,132.0,4.1
2018-06-11 17:03:00,1952.9,16.7,-47.51,4.33,132.0,3.7
2018-06-11 17:23:00,1958.2,11.2,-47.2,4.38,132.0,3.1
2018-06-11 17:38:00,1966.1,10.0,-47.44,4.2,264.0,3.4
2018-06-11 19:33:00,1979.8,6.5,-47.23,4.09,44.0,3.7
2018-06-11 19:53:00,2027.7,39.7,-46.62,4.19,44.0,2.4
2018-06-11 20:12:00,1997.0,8.5,-47.05,4.32,88.0,3.4
2018-06-11 20:32:00,2010.9,23.4,-46.7,4.33,176.0,2.7
2018-06-11 20:52:00,2016.5,19.2,-46.71,3.98,0.0,2.4
2018-06-11 21:12:00,2003.6,10.4,-46.9,3.99,132.0,2.0
2018-06-11 21:32:00,2017.8,19.0,-46.7,4.19,132.0,2.0
2018-06-11 21:52:00,2006.5,24.6,-46.77,4.21,88.0,3.7
2018-06-11 22:13:00,2013.2,37.2,-46.7,4.21,88.0,3.1
2018-06-11 22:33:00,2031.0,41.2,-46.87,4.17,132.0,2.7
2018-06-11 22:52:00,2015.3,14.7,-46.86,4.27,132.0,0.7
2018-06-11 23:12:00,2043.6,9.9,-46.59,3.88,176.0,1.0
2018-06-11 23:32:00,2023.5,16.7,-46.89,4.13,44.0,2.7
2018-06-11 23:52:00,2026.6,24.2,-46.58,4.01,88.0,3.1
2018-06-12 00:12:00,2034.9,16.4,-46.55,4.19,88.0,3.4
2018-06-12 00:32:00,2008.6,8.0,-46.71,4.2,132.0,2.0
2018-06-12 00:52:00,2012.4,7.2,-46.49,3.9,132.0,1.7
2018-06-12 01:12:00,2019.2,10.5,-46.77,4.14,176.0,1.4
2018-06-12 01:33:00,1995.4,13.6,-46.67,4.11,0.0,2.4
2018-06-12 01:52:00,1994.6,4.7,-46.86,4.12,88.0,1.0
2018-06-12 02:13:00,1993.8,1.8,-46.23,4.01,88.0,2.0
2018-06-12 02:32:00,2009.5,4.5,-46.15,4.35,308.0,2.4
2018-06-12 02:52:00,2041.4,24.8,-46.71,4.25,22.0,0.7
2018-06-12 03:13:00,2055.0,17.3,-46.61,4.24,44.0,1.4
2018-06-12 03:33:00,2060.1,36.1,-46.78,4.22,88.0,2.0
2018-06-12 03:52:00,2060.6,29.7,-46.32,4.13,44.0,2.7
2018-06-12 04:12:00,2071.6,29.9,-46.33,4.11,88.0,2.0
2018-06-12 04:32:00,2081.3,19.9,-46.25,4.23,0.0,2.4
2018-06-12 04:53:00,2040.5,17.5,-47.11,4.16,308.0,1.7
2018-06-12 05:12:00,2058.7,29.3,-46.67,4.04,88.0,2.4
2018-06-12 05:33:00,2012.5,15.4,-47.17,3.91,286.0,1.7
2018-06-12 05:53:00,2008.0,25.9,-46.98,3.91,308.0,1.7
2018-06-12 06:08:00,2017.0,25.7,-46.9,4.24,264.0,1.0
2018-06-12 08:02:00,1998.6,44.5,-46.57,4.1,132.0,3.1
2018-06-12 08:23:00,1985.6,20.0,-46.75,4.24,264.0,1.0
2018-06-12 08:43:00,1982.8,18.4,-46.64,3.91,132.0,1.7
2018-06-12 09:02:00,1989.2,21.9,-46.53,4.44,264.0,1.4
2018-06-12 09:22:00,1987.5,16.3,-46.76,4.12,88.0,2.0
2018-06-12 09:42:00,1966.8,10.0,-46.62,4.45,132.0,1.7
2018-06-12 10:02:00,1962.4,2.2,-46.58,4.31,264.0,2.7
2018-06-12 10:23:00,1964.7,2.0,-46.31,4.42,264.0,3.7
2018-06-12 10:43:00,1980.4,25.7,-46.67,3.94,nan,0.7
2018-06-12 11:02:00,1963.4,2.4,-46.35,4.26,0.0,2.4
2018-06-12 11:23:00,1968.9,3.7,-46.55,4.23,0.0,1.0
2018-06-12 11:42:00,1961.0,6.8,-46.65,3.86,264.0,2.4
2018-06-12 12:03:00,1963.2,15.4,-46.54,4.72,308.0,2.4
2018-06-12 12:23:00,1964.5,20.9,-46.32,3.89,88.0,2.7
2018-06-12 12:42:00,1954.1,7.4,-46.41,4.17,308.0,2.4
2018-06-12 13:02:00,1971.2,31.5,-46.61,4.61,88.0,1.0
2018-06-12 13:23:00,1966.3,6.1,-46.24,4.19,132.0,1.7
2018-06-12 13:43:00,1967.7,6.5,-46.55,4.19,264.0,2.7
2018-06-12 14:02:00,1960.7,6.1,-46.32,4.14,88.0,2.4
2018-06-12 14:22:00,1960.8,5.3,-46.97,4.18,286.0,2.7
2018-06-12 14:42:00,1951.9,6.4,-46.2,4.41,308.0,1.7
2018-06-12 15:03:00,1947.6,3.0,-46.8,4.04,132.0,2.0
2018-06-12 17:00:00,1942.0,4.1,-47.68,4.22,308.0,2.7
2018-06-12 17:20:00,1941.8,3.3,-48.44,4.04,0.0,2.7
2018-06-12 17:39:00,1939.5,2.3,-48.16,4.75,0.0,2.4
2018-06-12 17:59:00,1938.9,2.7,-47.63,4.59,264.0,1.7
2018-06-12 18:20:00,1940.3,3.0,-47.73,4.56,308.0,2.0
2018-06-12 18:35:00,1938.2,1.8,-47.46,4.4,176.0,1.4
2018-06-12 20:30:00,1946.4,2.2,-46.73,4.19,0.0,1.4
2018-06-12 20:50:00,1951.5,6.8,-46.87,3.88,44.0,2.4
2018-06-12 21:10:00,1957.8,6.2,-46.77,4.12,264.0,1.7
2018-06-12 21:30:00,1958.6,6.7,-46.87,4.33,44.0,1.7
2018-06-12 21:50:00,1972.8,3.3,-46.59,4.46,0.0,1.0
2018-06-12 22:09:00,1971.3,3.8,-46.99,4.14,0.0,1.0
2018-06-12 22:29:00,1974.7,3.9,-46.72,4.03,308.0,1.4
2018-06-12 22:49:00,1978.3,3.3,-46.86,4.27,88.0,1.7
2018-06-12 23:09:00,1978.2,1.9,-46.98,4.52,308.0,0.7
2018-06-12 23:29:00,1974.8,5.0,-46.89,3.9,44.0,0.7
2018-06-12 23:49:00,1976.8,6.2,-46.93,4.37,220.0,0.3
2018-06-13 00:10:00,1982.0,2.3,-46.86,4.12,0.0,0.3
2018-06-13 00:30:00,1992.5,6.7,-46.93,3.93,44.0,1.0
2018-06-13 00:49:00,2008.1,10.8,-46.83,3.8,308.0,1.7
2018-06-13 01:09:00,2000.1,7.1,-46.88,4.0,0.0,1.4
2018-06-13 01:29:00,2002.1,6.3,-46.84,4.17,0.0,1.0
2018-06-13 01:50:00,2019.1,5.0,-46.77,3.94,0.0,0.7
2018-06-13 02:10:00,2039.0,6.3,-46.86,3.91,44.0,0.3
2018-06-13 02:30:00,2067.7,11.0,-46.36,3.97,0.0,0.3
2018-06-13 02:49:00,2112.7,41.4,-46.53,4.0,44.0,0.0
2018-06-13 03:09:00,2116.4,18.3,-46.15,3.78,44.0,0.0
2018-06-13 03:30:00,2129.1,18.4,-46.06,3.97,264.0,0.7
2018-06-13 03:49:00,2164.3,13.9,-46.22,3.78,0.0,0.7
2018-06-13 04:09:00,2178.7,16.7,-45.74,3.68,264.0,0.3
2018-06-13 04:29:00,2208.3,33.5,-45.81,3.73,308.0,0.3
2018-06-13 04:49:00,2275.7,25.5,-45.55,3.53,308.0,0.3
2018-06-13 05:10:00,2309.4,22.0,-45.55,3.72,220.0,0.7
2018-06-13 05:30:00,2325.5,14.8,-45.35,3.63,176.0,0.0
2018-06-13 05:50:00,2259.2,29.5,-45.6,3.79,220.0,0.3
2018-06-13 06:10:00,2213.7,8.8,-46.0,3.89,176.0,1.7
2018-06-13 06:29:00,2194.9,29.1,-46.62,3.61,0.0,0.7
2018-06-13 06:49:00,2158.4,26.7,-46.03,3.78,220.0,1.0
2018-06-13 07:05:00,2198.5,9.8,-46.66,3.56,nan,0.7
2018-06-13 08:59:00,2016.2,13.1,-46.76,3.91,nan,0.7
2018-06-13 09:19:00,1992.4,6.3,-47.15,4.18,176.0,0.7
2018-06-13 09:40:00,1976.3,5.9,-46.99,4.19,88.0,1.7
2018-06-13 09:53:00,1965.8,3.8,-46.96,4.3,264.0,0.7
2018-06-13 11:57:00,1967.1,4.6,-47.18,4.18,220.0,1.7
2018-06-13 12:17:00,1958.1,3.1,-47.24,4.28,220.0,3.1
2018-06-13 12:37:00,1959.9,5.0,-47.61,3.97,220.0,1.4
2018-06-13 12:57:00,1956.0,2.6,-47.36,3.98,220.0,3.4
2018-06-13 13:17:00,1958.2,6.4,-47.61,3.73,220.0,4.4
2018-06-13 13:32:00,1955.9,4.5,-47.21,4.48,0.0,1.7
2018-06-13 15:48:00,1966.0,5.7,-46.66,3.98,176.0,5.1
2018-06-13 16:08:00,1960.9,4.0,-46.92,4.38,154.0,3.7
2018-06-13 16:28:00,1960.6,4.2,-46.59,4.51,242.0,4.4
2018-06-13 16:48:00,1953.3,4.5,-47.13,4.31,264.0,4.8
2018-06-13 17:08:00,1952.3,3.9,-47.02,4.23,264.0,3.7
2018-06-13 17:23:00,1957.1,1.9,-46.88,4.21,0.0,4.1
2018-06-13 19:18:00,1960.6,4.2,-47.09,4.2,0.0,4.1
2018-06-13 19:38:00,1960.8,3.7,-47.11,4.08,220.0,4.1
2018-06-13 19:57:00,1961.0,2.8,-46.84,4.16,220.0,4.1
2018-06-13 20:18:00,1969.7,4.7,-46.63,3.79,176.0,3.4
2018-06-13 20:38:00,1973.3,4.2,-47.07,4.5,0.0,2.4
2018-06-13 20:58:00,1972.7,4.1,-46.88,4.1,220.0,3.4
2018-06-13 21:18:00,1978.7,4.8,-47.09,4.04,242.0,2.4
2018-06-13 21:37:00,1982.7,3.7,-46.99,4.15,176.0,2.4
2018-06-13 21:57:00,1989.4,4.2,-47.07,4.18,176.0,2.7
2018-06-13 22:18:00,1995.6,3.0,-47.17,3.98,264.0,4.4
2018-06-13 22:38:00,1997.9,2.9,-47.51,4.71,176.0,3.4
2018-06-13 22:58:00,1996.5,3.0,-47.15,4.02,0.0,2.4
2018-06-13 23:17:00,1999.4,4.5,-46.93,3.98,220.0,1.7
2018-06-13 23:37:00,1994.9,6.0,-47.0,3.86,176.0,4.8
2018-06-13 23:58:00,1991.7,3.8,-47.28,4.39,330.0,1.7
2018-06-14 00:18:00,1993.2,3.6,-46.65,4.21,242.0,2.0
2018-06-14 00:37:00,1993.9,3.3,-46.96,4.31,264.0,1.4
2018-06-14 00:57:00,1998.7,3.4,-47.06,4.39,220.0,1.7
2018-06-14 01:18:00,1999.7,3.1,-47.0,3.97,176.0,2.7
2018-06-14 01:38:00,1982.2,4.6,-46.93,4.13,220.0,2.4
2018-06-14 01:57:00,1978.1,3.8,-47.04,4.24,220.0,2.7
2018-06-14 02:18:00,1968.6,4.0,-46.81,4.12,264.0,3.1
2018-06-14 02:38:00,1969.5,3.7,-47.07,4.3,286.0,4.1
2018-06-14 02:58:00,1965.9,6.9,-46.44,4.16,220.0,5.4
2018-06-14 03:18:00,1956.1,3.4,-47.28,4.11,220.0,3.1
2018-06-14 03:37:00,1951.3,6.0,-46.89,4.01,220.0,2.7
2018-06-14 03:57:00,1946.0,2.6,-46.62,4.17,220.0,3.7
2018-06-14 04:17:00,1946.7,2.6,-46.6,4.67,264.0,6.1
2018-06-14 04:38:00,1948.5,3.1,-46.65,4.51,176.0,2.7
2018-06-14 04:58:00,1945.2,3.6,-45.97,4.45,308.0,2.4
2018-06-14 05:18:00,1945.8,3.3,-46.34,4.38,176.0,2.4
2018-06-14 05:37:00,1942.1,2.3,-46.65,4.18,308.0,3.1
2018-06-14 05:53:00,1941.0,2.2,-46.7,4.12,242.0,3.7
2018-06-14 07:48:00,1945.9,3.9,-46.48,4.14,264.0,5.4
2018-06-14 08:07:00,1948.3,3.2,-46.21,4.42,264.0,2.4
2018-06-14 08:27:00,1944.0,3.0,-46.69,4.28,264.0,3.1
2018-06-14 08:47:00,1944.0,3.6,-46.49,4.47,264.0,4.1
2018-06-14 09:07:00,1942.9,3.0,-46.94,4.15,264.0,4.8
2018-06-14 09:27:00,1948.1,3.5,-46.39,4.43,308.0,4.1
2018-06-14 09:48:00,1938.4,2.5,-46.7,4.64,176.0,4.1
2018-06-14 10:08:00,1942.3,3.8,-46.52,4.33,220.0,5.1
2018-06-14 10:28:00,1939.4,3.0,-46.6,4.16,264.0,3.7
2018-06-14 10:47:00,1934.5,2.1,-46.74,4.52,220.0,4.1
2018-06-14 11:07:00,1933.4,2.5,-46.78,4.36,264.0,2.7
2018-06-14 11:27:00,1934.1,3.5,-46.38,4.43,176.0,4.1
2018-06-14 11:48:00,1933.7,3.6,-45.88,4.22,220.0,5.1
2018-06-14 12:07:00,1937.7,2.6,-46.67,4.36,308.0,6.1
2018-06-14 12:27:00,1941.8,3.5,-46.29,4.32,220.0,5.1
2018-06-14 12:48:00,1942.3,4.9,-46.1,4.1,308.0,6.8
2018-06-14 13:08:00,1942.5,8.0,-45.98,3.96,264.0,3.1
2018-06-14 13:28:00,1942.2,5.2,-46.47,4.41,308.0,2.4
2018-06-14 13:48:00,1943.2,5.7,-46.61,4.22,220.0,3.1
2018-06-14 14:08:00,1943.1,4.2,-46.41,4.39,264.0,3.4
2018-06-14 14:28:00,1943.9,4.2,-46.4,4.62,220.0,5.1
2018-06-14 14:47:00,1944.3,6.2,-46.91,4.08,308.0,2.7
2018-06-14 15:08:00,1944.1,5.4,-46.9,4.17,264.0,4.4
2018-06-14 15:27:00,1948.1,6.9,-46.71,3.84,308.0,4.4
2018-06-14 15:47:00,1947.1,5.1,-46.56,4.25,nan,3.7
2018-06-14 16:07:00,1944.2,5.1,-46.83,4.64,264.0,4.1
2018-06-14 16:28:00,1946.1,4.4,-46.93,4.2,308.0,2.4
2018-06-14 16:47:00,1955.9,4.7,-46.65,4.44,264.0,3.4
2018-06-14 17:08:00,1964.5,11.5,-46.42,4.07,308.0,2.4
2018-06-14 17:23:00,1956.4,4.6,-46.21,4.18,220.0,3.4
2018-06-14 19:18:00,1961.0,6.4,-46.53,4.04,176.0,2.0
2018-06-14 19:39:00,1956.9,4.6,-46.81,4.1,308.0,1.4
2018-06-14 19:59:00,1965.1,10.0,-46.97,4.17,330.0,1.0
2018-06-14 20:19:00,1969.3,5.3,-46.85,3.96,264.0,1.0
2018-06-14 20:38:00,1979.3,4.2,-46.61,4.41,286.0,1.4
2018-06-14 20:59:00,2000.4,13.1,-46.3,4.15,308.0,0.7
2018-06-14 21:19:00,2017.4,13.5,-46.64,3.82,308.0,1.4
2018-06-14 21:39:00,2039.1,16.5,-46.33,4.09,308.0,0.3
2018-06-14 21:59:00,2068.0,14.1,-46.47,3.98,308.0,1.7
2018-06-14 22:18:00,2072.2,11.4,-45.85,4.01,286.0,1.7
2018-06-14 22:38:00,2057.2,5.5,-46.54,4.2,264.0,1.4
2018-06-14 22:58:00,2055.1,7.3,-46.59,4.02,308.0,2.0
2018-06-14 23:19:00,2038.9,10.3,-46.62,3.96,22.0,2.4
2018-06-14 23:39:00,2030.4,4.7,-46.17,4.08,264.0,2.7
2018-06-14 23:59:00,2026.1,4.7,-46.5,4.29,308.0,1.7
2018-06-15 00:18:00,2033.1,7.0,-46.68,3.97,264.0,1.7
2018-06-15 00:38:00,2045.5,5.1,-46.57,4.18,264.0,2.0
2018-06-15 00:58:00,2068.4,14.1,-46.46,4.0,264.0,0.7
2018-06-15 01:19:00,2088.7,8.6,-46.87,4.08,308.0,1.4
2018-06-15 01:39:00,2091.5,10.9,-46.19,4.06,264.0,1.0
2018-06-15 01:58:00,2129.0,11.3,-46.37,3.69,308.0,0.3
2018-06-15 02:18:00,2122.9,7.0,-46.25,3.82,264.0,0.7
2018-06-15 02:38:00,2141.5,6.9,-46.25,4.03,308.0,1.0
2018-06-15 02:58:00,2151.4,9.1,-46.33,3.74,264.0,1.0
2018-06-15 03:18:00,2151.2,7.6,-46.46,3.75,264.0,1.0
2018-06-15 03:38:00,2184.9,19.1,-45.95,3.8,308.0,0.7
2018-06-15 03:59:00,2254.1,26.7,-45.6,3.78,220.0,0.7
2018-06-15 04:18:00,2276.7,9.5,-45.78,3.44,264.0,1.0
2018-06-15 04:38:00,2291.6,13.7,-45.79,3.4,264.0,1.0
2018-06-15 04:58:00,2325.7,13.5,-45.87,3.47,0.0,0.3
2018-06-15 05:18:00,2326.4,10.3,-45.41,3.63,264.0,0.7
2018-06-15 05:38:00,2309.4,8.4,-45.61,3.61,264.0,0.7
2018-06-15 05:54:00,2312.7,8.1,-45.12,3.45,308.0,0.7
2018-06-15 07:49:00,nan,nan,nan,nan,nan,1.0
2018-06-15 08:09:00,nan,nan,nan,nan,308.0,1.4
2018-06-15 08:29:00,nan,nan,nan,nan,264.0,2.0
2018-06-15 08:48:00,nan,nan,nan,nan,0.0,1.4
2018-06-15 09:08:00,nan,nan,nan,nan,264.0,1.4
2018-06-15 09:28:00,nan,nan,nan,nan,308.0,2.4
2018-06-15 09:49:00,nan,nan,nan,nan,220.0,1.0
2018-06-15 10:09:00,nan,nan,nan,nan,220.0,1.4
2018-06-15 10:29:00,nan,nan,nan,nan,330.0,2.7
2018-06-15 10:49:00,nan,nan,nan,nan,264.0,1.4
2018-06-15 11:08:00,nan,nan,nan,nan,308.0,2.0
2018-06-15 11:29:00,nan,nan,nan,nan,176.0,1.7
2018-06-15 11:49:00,nan,nan,nan,nan,132.0,1.0
2018-06-15 12:08:00,nan,nan,nan,nan,220.0,1.4
2018-06-15 12:29:00,nan,nan,nan,nan,176.0,2.7
2018-06-15 12:49:00,nan,nan,nan,nan,308.0,2.7
2018-06-15 13:08:00,nan,nan,nan,nan,154.0,2.7
2018-06-15 13:28:00,nan,nan,nan,nan,220.0,3.1
2018-06-15 13:48:00,nan,nan,nan,nan,308.0,2.7
2018-06-15 14:08:00,nan,nan,nan,nan,176.0,1.7
2018-06-15 14:29:00,nan,nan,nan,nan,132.0,0.7
2018-06-15 14:49:00,nan,nan,nan,nan,308.0,3.4
2018-06-15 15:09:00,nan,nan,nan,nan,176.0,2.0
2018-06-15 15:24:00,nan,nan,nan,nan,264.0,4.8
2018-06-18 09:16:00,nan,nan,nan,nan,242.0,3.4
2018-06-18 09:36:00,nan,nan,nan,nan,308.0,2.4
2018-06-18 09:55:00,nan,nan,nan,nan,220.0,3.4
2018-06-18 10:15:00,nan,nan,nan,nan,242.0,3.1
2018-06-18 10:36:00,nan,nan,nan,nan,286.0,3.4
2018-06-18 10:56:00,nan,nan,nan,nan,176.0,3.7
2018-06-18 12:55:00,1957.3,4.6,-47.23,4.28,132.0,2.0
2018-06-18 13:15:00,1951.6,4.7,-47.14,3.85,176.0,4.1
2018-06-18 13:36:00,1954.6,8.7,-47.24,4.28,264.0,5.1
2018-06-18 13:51:00,1949.9,4.2,-46.9,4.43,220.0,3.1
2018-06-18 15:01:00,1933.6,5.0,-46.84,4.02,308.0,5.1
2018-06-18 15:21:00,1933.4,8.9,-47.31,4.03,308.0,5.8
2018-06-18 15:41:00,1932.1,2.9,-47.41,4.31,264.0,3.4
2018-06-18 16:01:00,1931.8,9.6,-47.23,4.46,220.0,1.7
2018-06-18 16:21:00,1936.8,7.4,-47.62,4.83,264.0,2.7
2018-06-18 17:14:00,1932.8,6.8,-47.11,4.67,264.0,4.4
2018-06-18 17:33:00,1945.1,6.7,-46.94,4.44,264.0,4.8
2018-06-18 17:53:00,1954.0,3.1,-47.26,4.26,176.0,5.8
2018-06-18 18:13:00,1954.2,3.6,-47.28,4.44,308.0,5.8
2018-06-18 18:33:00,1953.2,4.9,-47.35,4.62,176.0,4.8
2018-06-18 18:49:00,1953.3,5.1,-47.69,4.54,308.0,2.7
2018-06-18 20:44:00,1946.1,3.7,-46.94,4.34,330.0,1.7
2018-06-18 21:04:00,1946.1,3.0,-47.39,4.15,220.0,3.1
2018-06-18 21:23:00,1941.7,4.0,-46.88,4.48,286.0,4.1
2018-06-18 21:43:00,1942.3,4.1,-47.01,4.57,220.0,2.7
2018-06-18 22:03:00,1942.5,2.9,-47.25,4.18,264.0,3.4
2018-06-18 22:23:00,1946.1,3.3,-46.75,4.14,220.0,3.1
2018-06-18 22:44:00,1944.2,2.5,-47.25,4.45,264.0,3.7
2018-06-18 23:04:00,1941.5,3.0,-46.72,4.33,110.0,2.4
2018-06-18 23:23:00,1937.7,2.5,-46.82,4.47,220.0,3.1
2018-06-18 23:44:00,1944.6,3.2,-46.93,4.51,308.0,2.0
2018-06-19 00:04:00,1943.6,6.9,-46.58,4.42,264.0,4.1
2018-06-19 00:23:00,1945.4,3.9,-46.59,4.44,264.0,2.4
2018-06-19 00:43:00,1930.7,7.1,-46.91,4.31,132.0,3.7
2018-06-19 01:04:00,1930.2,5.2,-46.61,4.53,264.0,2.4
2018-06-19 01:23:00,1941.5,4.6,-46.58,4.16,264.0,2.4
2018-06-19 01:43:00,1943.5,4.9,-46.9,4.35,176.0,1.7
2018-06-19 02:03:00,1944.2,5.3,-46.77,4.4,264.0,1.7
2018-06-19 02:23:00,1963.8,5.4,-46.78,4.21,264.0,2.4
2018-06-19 02:43:00,1954.2,4.7,-46.59,4.26,264.0,2.4
2018-06-19 03:03:00,1950.5,4.7,-46.17,4.07,264.0,2.7
2018-06-19 03:23:00,1938.5,13.0,-46.27,4.49,264.0,3.1
2018-06-19 03:44:00,1927.4,7.1,-46.33,4.19,286.0,4.1
2018-06-19 04:04:00,1922.7,4.8,-46.09,4.33,264.0,2.4
2018-06-19 04:24:00,1915.8,3.6,-46.78,3.96,264.0,3.1
2018-06-19 04:44:00,1916.3,4.5,-46.55,4.35,264.0,4.1
2018-06-19 05:03:00,1924.2,6.0,-46.43,4.59,308.0,2.7
2018-06-19 05:23:00,1924.3,4.6,-46.39,4.34,264.0,2.0
2018-06-19 05:44:00,1923.5,3.3,-46.19,4.25,220.0,1.7
2018-06-19 06:03:00,1923.1,5.9,-46.05,4.06,264.0,1.7
2018-06-19 06:24:00,1926.4,6.0,-46.51,4.45,220.0,2.0
2018-06-19 06:44:00,1920.8,5.7,-45.82,4.22,264.0,2.4
2018-06-19 07:04:00,1925.2,5.0,-46.07,4.36,286.0,2.0
2018-06-19 07:19:00,1929.3,6.8,-46.37,4.17,264.0,2.4
2018-06-19 09:15:00,1922.3,4.6,-46.55,4.29,220.0,2.7
2018-06-19 09:34:00,1928.6,8.3,-46.41,4.52,0.0,3.1
2018-06-19 09:54:00,1923.9,7.2,-46.98,4.56,264.0,2.0
2018-06-19 10:14:00,1927.9,10.6,-46.37,4.61,308.0,2.4
2018-06-19 10:35:00,1923.0,4.5,-46.13,4.56,176.0,1.4
2018-06-19 10:55:00,1926.3,7.9,-46.67,4.02,220.0,2.0
2018-06-19 11:14:00,1917.4,7.1,-46.92,4.25,264.0,2.7
2018-06-19 11:35:00,1915.2,5.5,-46.99,4.43,308.0,2.4
2018-06-19 11:54:00,1921.1,7.1,-46.09,4.54,132.0,1.7
2018-06-19 12:15:00,1929.3,5.8,-46.05,4.49,264.0,2.0
2018-06-19 12:35:00,1920.4,9.4,-46.67,4.42,308.0,2.7
2018-06-19 12:54:00,1919.1,6.4,-46.81,4.31,286.0,3.7
2018-06-19 13:15:00,1922.2,9.8,-46.64,4.34,132.0,2.7
2018-06-19 13:35:00,1917.6,5.5,-47.03,4.41,264.0,3.7
2018-06-19 13:54:00,1917.2,6.9,-47.03,4.11,264.0,3.1
2018-06-19 14:15:00,1913.8,2.6,-47.36,4.2,264.0,2.7
2018-06-19 14:34:00,1923.3,7.5,-47.14,4.18,264.0,2.0
2018-06-19 14:55:00,1925.2,6.6,-46.87,4.61,264.0,3.7
2018-06-19 15:14:00,1921.9,9.8,-47.2,4.32,220.0,3.7
2018-06-19 15:29:00,1920.2,6.6,-47.05,4.33,286.0,3.4
2018-06-19 16:50:00,1915.5,6.2,-47.21,4.32,220.0,4.1
2018-06-19 17:10:00,1915.6,2.5,-47.46,4.78,220.0,4.1
2018-06-19 17:30:00,1916.8,4.1,-47.39,4.32,220.0,1.7
2018-06-19 17:50:00,1918.1,4.1,-48.03,4.35,264.0,2.0
2018-06-19 18:10:00,1914.6,3.7,-47.51,4.7,220.0,3.7
2018-06-19 18:26:00,1922.5,4.8,-47.7,4.68,264.0,3.1
2018-06-19 20:21:00,1909.6,4.2,-47.4,4.52,242.0,3.7
2018-06-19 20:41:00,1916.3,5.6,-47.02,4.23,220.0,2.7
2018-06-19 21:01:00,1912.1,4.4,-47.78,4.69,220.0,2.7
2018-06-19 21:20:00,1929.6,5.5,-46.85,4.27,308.0,2.4
2018-06-19 21:41:00,1920.5,6.0,-46.89,4.58,220.0,1.7
2018-06-19 22:00:00,1929.1,7.7,-47.27,4.26,308.0,1.4
2018-06-19 22:20:00,1928.7,6.5,-47.18,4.48,264.0,2.0
2018-06-19 22:40:00,1930.2,8.4,-46.75,4.44,176.0,2.0
2018-06-19 23:00:00,1925.2,4.1,-47.13,4.42,242.0,3.7
2018-06-19 23:21:00,1926.7,5.1,-47.08,4.41,220.0,1.7
2018-06-19 23:41:00,1929.3,3.4,-46.9,4.24,264.0,3.1
2018-06-20 00:01:00,1934.5,4.6,-46.91,4.32,220.0,3.7
2018-06-20 00:21:00,1937.5,3.9,-47.1,4.51,132.0,2.0
2018-06-20 00:40:00,1945.1,5.8,-46.82,4.36,264.0,1.7
2018-06-20 01:01:00,1956.7,4.3,-47.02,4.15,220.0,2.4
2018-06-20 01:21:00,1967.8,8.1,-46.73,4.12,132.0,0.7
2018-06-20 01:41:00,1976.9,7.0,-46.73,4.26,330.0,2.4
2018-06-20 02:01:00,1984.1,5.1,-46.8,4.15,264.0,1.4
2018-06-20 02:21:00,2002.1,7.6,-46.71,4.08,198.0,1.4
2018-06-20 02:41:00,1990.3,4.6,-46.31,4.2,176.0,2.0
2018-06-20 03:01:00,1985.1,10.2,-46.76,4.17,44.0,2.0
2018-06-20 03:20:00,1966.3,3.8,-46.73,4.29,308.0,2.7
2018-06-20 03:40:00,1959.7,7.2,-46.93,4.31,176.0,3.1
2018-06-20 04:01:00,1942.1,6.1,-46.82,4.36,176.0,3.4
2018-06-20 04:21:00,1937.7,5.1,-47.08,4.43,110.0,2.4
2018-06-20 04:40:00,1937.6,3.6,-46.78,4.06,264.0,3.4
2018-06-20 05:00:00,1933.8,4.9,-47.16,4.13,176.0,1.0
2018-06-20 05:20:00,1928.6,5.3,-47.12,4.27,286.0,3.7
2018-06-20 05:40:00,1928.8,4.7,-46.64,4.31,308.0,2.7
2018-06-20 06:00:00,1914.5,3.0,-46.62,4.25,220.0,2.4
2018-06-20 06:20:00,1919.0,3.3,-46.68,4.48,0.0,3.4
2018-06-20 06:40:00,1918.7,5.1,-46.84,4.6,308.0,3.7
2018-06-20 06:56:00,1926.5,5.1,-46.8,4.61,264.0,1.0
2018-06-20 08:51:00,1904.5,4.0,-46.7,4.44,220.0,3.7
2018-06-20 09:11:00,1907.1,3.4,-46.32,4.56,220.0,4.4
2018-06-20 09:30:00,1916.1,4.6,-46.26,4.25,264.0,3.1
2018-06-20 09:50:00,1908.9,5.9,-46.76,4.09,220.0,4.1
2018-06-20 10:11:00,1904.2,3.3,-46.4,4.18,220.0,1.7
2018-06-20 10:31:00,1906.6,4.3,-47.02,4.06,308.0,1.7
2018-06-20 10:51:00,1899.7,5.6,-47.07,4.35,176.0,2.7
2018-06-20 11:10:00,1903.3,5.1,-46.86,4.25,220.0,3.7
2018-06-20 11:30:00,1904.3,3.7,-46.93,4.19,220.0,2.7
2018-06-20 11:51:00,1903.6,4.3,-46.62,4.2,220.0,3.4
2018-06-20 12:10:00,1907.3,5.1,-47.07,4.39,308.0,2.4
2018-06-20 12:31:00,1902.4,5.3,-46.98,4.4,308.0,2.4
2018-06-20 12:50:00,1900.6,5.6,-47.31,4.22,nan,2.7
2018-06-20 13:11:00,1898.0,3.8,-47.14,4.49,264.0,3.4
2018-06-20 13:31:00,1896.3,3.3,-46.93,4.64,242.0,4.8
2018-06-20 13:48:00,1895.2,2.1,-47.2,4.33,264.0,1.7
2018-06-20 15:23:00,1907.1,8.0,-46.87,4.37,0.0,5.1
2018-06-20 15:38:00,1911.2,7.3,-47.6,4.01,264.0,2.4
2018-06-20 16:49:00,1914.4,5.6,-47.79,4.66,264.0,2.0
2018-06-20 17:10:00,1919.1,8.0,-47.64,4.36,264.0,3.7
2018-06-20 17:30:00,1927.6,11.5,-47.57,4.46,308.0,3.4
2018-06-20 17:50:00,1925.1,4.1,-47.89,4.65,264.0,3.4
2018-06-20 18:10:00,1919.6,9.1,-47.65,4.19,264.0,4.4
2018-06-20 18:25:00,1913.4,6.6,-47.32,4.47,264.0,3.4
2018-06-20 20:19:00,1939.8,7.9,-47.57,4.28,308.0,3.1
2018-06-20 20:40:00,1955.5,7.7,-47.49,4.16,308.0,2.7
2018-06-20 20:59:00,1947.3,7.6,-47.01,4.09,264.0,3.1
2018-06-20 21:19:00,1950.8,10.4,-47.88,4.17,264.0,1.4
2018-06-20 21:40:00,1934.8,8.2,-47.24,4.2,264.0,4.1
2018-06-20 21:59:00,1954.1,9.9,-47.78,3.93,286.0,3.1
2018-06-20 22:19:00,1962.2,1.8,-47.87,4.14,0.0,3.1
2018-06-20 22:40:00,1966.2,5.2,-47.98,4.28,308.0,2.7
2018-06-20 23:00:00,1966.2,2.7,-47.97,4.37,264.0,4.8
2018-06-20 23:20:00,1973.3,4.2,-47.72,3.88,264.0,3.1
2018-06-20 23:40:00,1968.4,3.1,-47.56,4.21,0.0,1.7
2018-06-20 23:59:00,1957.5,11.4,-47.8,4.44,308.0,4.1
2018-06-21 00:19:00,1948.7,1.7,-47.41,4.35,0.0,3.4
2018-06-21 00:39:00,1952.9,2.5,-47.99,3.92,286.0,3.1
2018-06-21 01:00:00,1953.1,3.0,-47.96,4.22,308.0,3.7
2018-06-21 01:20:00,1955.5,2.4,-48.09,4.06,308.0,4.1
2018-06-21 01:39:00,1956.4,3.1,-48.09,4.06,308.0,4.8
2018-06-21 01:59:00,1952.4,2.3,-47.85,4.21,286.0,4.4
2018-06-21 02:20:00,1952.1,2.2,-48.05,3.98,308.0,4.1
2018-06-21 02:39:00,1953.8,3.3,-47.56,4.36,264.0,3.1
2018-06-21 02:59:00,1962.1,2.9,-47.18,4.12,308.0,3.1
2018-06-21 03:19:00,1966.8,3.6,-47.89,4.04,176.0,2.0
2018-06-21 03:39:00,1966.1,2.3,-47.51,4.27,0.0,2.7
2018-06-21 03:59:00,1973.4,3.7,-47.54,4.33,308.0,4.4
2018-06-21 04:19:00,1978.8,4.2,-47.76,4.09,0.0,3.1
2018-06-21 04:40:00,1982.8,3.8,-47.83,4.16,264.0,2.7
2018-06-21 04:59:00,1986.1,3.1,-47.9,4.06,220.0,3.7
2018-06-21 05:19:00,1977.5,5.3,-47.75,4.15,0.0,4.4
2018-06-21 05:39:00,1970.0,3.2,-47.81,4.03,264.0,3.1
2018-06-21 05:59:00,1964.1,7.1,-47.6,4.12,308.0,3.7
2018-06-21 06:19:00,1955.3,3.4,-47.41,4.43,330.0,4.1
2018-06-21 06:40:00,1955.3,4.4,-47.92,4.18,308.0,4.4
2018-06-21 06:55:00,1958.9,2.8,-47.57,4.0,0.0,6.5
2018-06-21 08:50:00,1942.4,2.2,-47.32,3.95,0.0,3.1
2018-06-21 09:11:00,1939.4,2.5,-47.7,4.04,308.0,3.7
2018-06-21 09:31:00,1940.6,2.0,-47.37,4.17,176.0,2.7
2018-06-21 09:51:00,1940.0,1.9,-47.32,4.19,0.0,3.4
2018-06-21 10:11:00,1940.8,2.2,-48.01,4.49,264.0,4.4
2018-06-21 10:30:00,1941.2,2.0,-47.6,4.36,242.0,2.4
2018-06-21 10:50:00,1942.0,3.9,-47.73,4.49,308.0,3.4
2018-06-21 11:11:00,1943.8,2.8,-47.8,4.01,220.0,3.1
2018-06-21 11:31:00,1940.3,1.7,-47.44,4.63,176.0,2.4
2018-06-21 11:51:00,1940.9,2.7,-47.41,4.11,220.0,3.1
2018-06-21 12:10:00,1941.5,6.0,-47.44,4.21,286.0,3.4
2018-06-21 12:30:00,1935.4,1.9,-47.57,4.18,264.0,2.0
2018-06-21 12:50:00,1934.3,4.1,-47.24,4.47,88.0,3.4
2018-06-21 13:11:00,1936.0,2.6,-47.38,4.09,264.0,3.4
2018-06-21 13:31:00,1934.7,3.3,-47.74,4.34,0.0,3.7
2018-06-21 13:51:00,1937.1,4.4,-47.89,4.16,0.0,1.0
2018-06-21 14:11:00,1936.7,4.2,-47.86,4.23,308.0,4.1
2018-06-21 14:31:00,1935.1,2.5,-47.54,4.07,22.0,2.4
2018-06-21 14:51:00,1935.9,1.5,-47.72,4.28,308.0,1.7
2018-06-21 15:10:00,1934.9,3.9,-47.58,4.24,88.0,1.7
2018-06-21 15:30:00,1937.1,2.0,-47.97,3.89,264.0,2.7
2018-06-21 15:50:00,1935.3,2.4,-47.24,4.22,0.0,3.1
2018-06-21 16:11:00,1937.9,2.6,-47.55,4.25,330.0,2.4
2018-06-21 16:31:00,1938.2,2.0,-47.36,4.12,132.0,2.0
2018-06-21 16:51:00,1937.4,2.4,-47.52,3.97,0.0,2.0
2018-06-21 17:10:00,1939.2,2.2,-48.08,4.27,132.0,1.7
2018-06-21 17:30:00,1940.1,2.3,-47.0,4.5,0.0,3.1
2018-06-21 17:50:00,1941.5,2.3,-47.66,3.93,198.0,1.7
2018-06-21 18:11:00,1944.8,2.6,-47.38,4.49,330.0,1.4
2018-06-21 18:26:00,1939.3,1.8,-47.26,4.15,220.0,1.4
2018-06-21 20:21:00,1960.5,4.0,-47.62,4.38,0.0,1.0
2018-06-21 20:40:00,1965.7,3.8,-47.39,4.32,286.0,2.7
2018-06-21 21:00:00,1969.5,3.8,-47.38,4.25,308.0,2.0
2018-06-21 21:21:00,1968.4,2.3,-47.55,4.05,286.0,2.4
2018-06-21 21:41:00,1964.1,2.2,-47.33,4.05,308.0,2.0
2018-06-21 22:01:00,1968.5,1.9,-47.44,4.17,264.0,3.1
2018-06-21 22:20:00,1967.9,2.1,-47.42,4.55,308.0,2.7
2018-06-21 22:40:00,1967.3,3.2,-47.54,4.14,0.0,4.1
2018-06-21 23:00:00,1965.3,2.3,-47.5,4.33,308.0,2.4
2018-06-21 23:21:00,1967.7,2.3,-47.87,3.99,308.0,2.7
2018-06-21 23:41:00,1967.9,2.3,-47.65,4.41,220.0,2.7
2018-06-22 00:00:00,1971.2,3.2,-47.84,4.19,308.0,2.4
2018-06-22 00:20:00,1976.1,2.3,-47.84,4.59,308.0,3.7
2018-06-22 00:40:00,1978.0,2.4,-47.95,4.36,308.0,3.1
2018-06-22 01:01:00,1983.7,4.4,-47.68,3.95,264.0,2.0
2018-06-22 01:20:00,1992.2,4.3,-47.82,4.11,308.0,1.0
2018-06-22 01:40:00,1997.6,6.8,-47.93,4.1,264.0,1.7
2018-06-22 02:01:00,2009.2,3.5,-47.71,4.25,0.0,0.7
2018-06-22 02:21:00,2005.3,6.0,-47.17,4.14,264.0,1.4
2018-06-22 02:41:00,2000.9,2.9,-47.62,4.32,308.0,2.0
2018-06-22 03:00:00,2021.7,11.7,-47.56,4.11,220.0,2.7
2018-06-22 03:21:00,2023.5,5.5,-47.34,4.1,308.0,1.4
2018-06-22 03:41:00,2019.9,3.2,-47.79,4.02,308.0,1.0
2018-06-22 04:01:00,2020.6,3.8,-47.83,4.28,308.0,1.0
2018-06-22 04:21:00,2029.2,10.7,-47.85,3.76,308.0,0.3
2018-06-22 04:40:00,2052.9,7.5,-47.99,4.01,330.0,0.7
2018-06-22 05:01:00,2070.9,10.6,-47.21,3.92,264.0,1.4
2018-06-22 05:21:00,2061.9,3.5,-48.1,4.05,264.0,0.7
2018-06-22 05:41:00,2066.2,8.2,-47.44,3.78,264.0,0.7
2018-06-22 06:01:00,2069.5,9.4,-47.81,3.82,264.0,0.7
2018-06-22 06:21:00,2031.5,13.1,-47.95,4.13,264.0,1.0
2018-06-22 06:41:00,2013.0,8.0,-48.15,4.02,176.0,1.7
2018-06-22 06:56:00,2003.5,2.1,-47.92,4.19,264.0,1.4
2018-06-22 08:50:00,1972.6,2.9,-47.57,4.26,308.0,2.4
2018-06-22 09:10:00,1986.8,43.5,-47.56,4.44,0.0,2.0
2018-06-22 09:31:00,1967.1,8.1,-47.84,4.23,308.0,1.4
2018-06-22 09:50:00,1975.2,20.0,-47.93,4.18,0.0,3.7
2018-06-22 10:10:00,1965.5,5.5,-47.39,4.27,308.0,1.0
2018-06-22 10:31:00,1960.1,4.7,-47.71,4.18,132.0,1.0
2018-06-22 10:50:00,1954.2,3.3,-47.59,4.23,308.0,1.0
2018-06-22 11:10:00,1954.2,2.9,-47.74,4.28,286.0,2.0
2018-06-22 11:30:00,1955.7,2.3,-47.63,4.13,264.0,1.7
2018-06-22 11:50:00,1948.9,2.3,-47.77,4.32,308.0,2.7
2018-06-22 12:10:00,1948.4,2.0,-47.44,4.09,308.0,2.0
2018-06-22 12:31:00,1949.3,5.9,-47.31,3.91,88.0,1.4
2018-06-22 12:50:00,1946.0,4.4,-47.75,4.19,308.0,2.4
2018-06-22 13:10:00,1942.6,2.7,-47.68,4.43,110.0,3.4
2018-06-22 13:30:00,1947.4,2.3,-47.61,4.23,0.0,0.7
2018-06-22 13:50:00,1946.2,3.2,-47.98,4.42,0.0,3.4
2018-06-22 14:11:00,1941.1,2.7,-47.42,4.12,308.0,2.4
2018-06-22 14:31:00,1944.4,2.8,-47.39,4.27,264.0,2.0
2018-06-22 14:50:00,1945.0,3.2,-47.86,4.37,264.0,3.1
2018-06-22 15:11:00,1944.8,4.1,-47.19,4.34,88.0,3.4
2018-06-22 15:30:00,1947.8,2.9,-47.29,4.43,286.0,2.4
2018-06-22 15:50:00,1968.1,30.5,-47.44,4.47,88.0,2.4
2018-06-22 16:10:00,1955.4,16.2,-47.39,4.1,308.0,1.4
2018-06-22 16:30:00,1970.3,21.9,-47.3,4.45,308.0,2.0
2018-06-22 16:51:00,1956.3,16.5,-47.29,4.22,308.0,2.0
2018-06-22 17:11:00,1944.8,3.9,-47.16,4.28,308.0,2.4
2018-06-22 17:30:00,1952.7,21.2,-47.56,4.57,88.0,1.0
2018-06-22 17:50:00,1966.5,25.3,-47.26,4.34,264.0,1.0
2018-06-22 18:10:00,1971.0,37.2,-47.45,4.13,0.0,3.1
2018-06-22 18:26:00,1950.0,4.2,-47.46,4.01,132.0,1.0
2018-06-22 20:22:00,1998.5,22.5,-47.03,4.12,198.0,3.1
2018-06-22 20:41:00,2044.5,29.0,-47.04,4.21,88.0,3.4
2018-06-22 21:01:00,2021.0,10.5,-47.09,4.43,88.0,3.1
2018-06-22 21:21:00,2011.2,10.0,-47.15,4.36,88.0,2.7
2018-06-22 21:41:00,1984.8,3.7,-47.28,4.33,132.0,3.4
2018-06-22 22:01:00,2019.7,65.8,-46.94,4.03,88.0,2.7
2018-06-22 22:21:00,2092.9,58.1,-46.35,3.96,132.0,2.7
2018-06-22 22:42:00,2160.8,106.1,-46.64,3.91,88.0,0.7
2018-06-22 23:02:00,2105.9,54.9,-46.86,4.09,132.0,0.7
2018-06-22 23:22:00,2035.3,29.0,-46.97,4.09,176.0,2.7
2018-06-22 23:41:00,2007.1,5.9,-47.3,4.31,132.0,2.0
2018-06-23 00:01:00,2048.3,17.9,-47.11,4.39,176.0,1.0
2018-06-23 00:21:00,2096.9,14.5,-47.22,4.0,176.0,0.7
2018-06-23 00:41:00,2062.7,19.7,-47.22,4.06,88.0,0.3
2018-06-23 01:02:00,2021.7,9.1,-46.77,4.35,132.0,0.7
2018-06-23 01:22:00,2014.0,5.5,-47.07,4.2,220.0,1.4
2018-06-23 01:41:00,2024.5,3.5,-47.07,4.02,308.0,2.4
2018-06-23 02:02:00,2022.3,5.8,-47.03,4.38,264.0,2.0
2018-06-23 02:22:00,2024.4,9.9,-47.18,4.19,308.0,1.4
2018-06-23 02:42:00,2031.2,6.7,-46.87,4.54,264.0,0.7
2018-06-23 03:02:00,2022.8,6.5,-46.99,3.95,220.0,1.4
2018-06-23 03:22:00,2020.6,4.9,-47.3,3.93,264.0,1.4
2018-06-23 03:42:00,2059.4,15.2,-46.79,4.37,308.0,2.0
2018-06-23 04:02:00,2095.6,5.6,-47.49,4.01,308.0,1.7
2018-06-23 04:22:00,2079.7,9.6,-47.03,4.02,264.0,3.1
2018-06-23 04:41:00,2091.4,13.3,-46.93,4.05,264.0,1.4
2018-06-23 05:02:00,2103.2,13.1,-47.17,3.91,264.0,1.0
2018-06-23 05:21:00,2114.9,8.7,-47.0,3.95,308.0,0.7
2018-06-23 05:41:00,2083.5,10.3,-46.49,4.06,308.0,0.7
2018-06-23 06:01:00,2102.7,4.6,-46.96,4.14,220.0,1.4
2018-06-23 06:21:00,2085.0,13.3,-46.78,4.0,308.0,2.4
2018-06-23 06:42:00,2075.3,7.2,-46.68,4.36,264.0,1.0
2018-06-23 06:57:00,2087.3,2.3,-46.79,4.25,308.0,0.7
2018-06-23 08:52:00,2045.2,12.7,-46.98,4.05,0.0,2.7
2018-06-23 09:11:00,2080.5,10.2,-46.83,3.85,264.0,1.4
2018-06-23 09:32:00,2020.5,27.2,-47.33,4.15,286.0,2.0
2018-06-23 09:52:00,1981.0,11.7,-46.85,4.04,264.0,1.4
2018-06-23 10:12:00,1963.5,7.5,-46.83,3.93,308.0,1.7
2018-06-23 10:32:00,1961.4,5.8,-47.02,4.28,308.0,2.7
2018-06-23 10:52:00,1962.1,4.1,-47.11,3.91,220.0,2.0
2018-06-23 11:11:00,1966.3,4.3,-47.01,3.95,264.0,3.1
2018-06-23 11:31:00,1969.9,5.6,-46.51,4.08,220.0,2.7
2018-06-23 11:52:00,1959.1,4.4,-46.82,4.04,220.0,3.7
2018-06-23 12:11:00,1955.1,3.6,-47.18,4.53,308.0,2.0
2018-06-23 12:31:00,1954.0,4.7,-47.03,4.3,308.0,4.1
2018-06-23 12:51:00,1952.4,4.0,-47.02,4.08,308.0,2.0
2018-06-23 13:11:00,1963.8,4.5,-46.57,4.36,308.0,2.7
2018-06-23 13:32:00,1967.5,8.3,-46.93,4.29,330.0,2.0
2018-06-23 13:51:00,1964.4,7.9,-47.57,4.28,308.0,2.4
2018-06-23 14:11:00,1957.7,4.2,-47.07,4.29,286.0,2.4
2018-06-23 14:31:00,1956.2,2.1,-47.57,3.91,308.0,3.7
2018-06-23 14:51:00,1960.6,6.3,-47.06,4.31,308.0,1.7
2018-06-23 15:12:00,1958.2,5.9,-47.31,4.35,308.0,2.0
2018-06-23 15:32:00,1953.2,3.1,-47.39,4.7,308.0,2.4
2018-06-23 15:51:00,1956.1,3.9,-47.28,4.43,88.0,1.7
2018-06-23 16:11:00,1970.8,4.8,-47.4,4.07,308.0,2.0
2018-06-23 16:31:00,1968.0,4.6,-47.39,4.24,308.0,1.4
2018-06-23 16:52:00,1971.5,4.0,-47.19,3.9,264.0,3.1
2018-06-23 17:11:00,1971.3,4.0,-47.35,4.34,308.0,2.4
2018-06-23 17:31:00,1976.6,3.1,-47.02,4.05,308.0,1.4
2018-06-23 17:51:00,1980.1,3.9,-47.12,4.37,308.0,2.7
2018-06-23 18:11:00,1979.6,5.6,-47.39,4.02,308.0,1.4
2018-06-23 18:27:00,1978.5,2.7,-47.43,3.99,0.0,2.0
2018-06-23 20:22:00,1999.1,5.6,-47.35,4.09,88.0,0.7
2018-06-23 20:42:00,1990.1,5.7,-47.31,4.06,44.0,0.7
2018-06-23 21:02:00,1982.4,4.1,-47.19,4.13,0.0,1.7
2018-06-23 21:22:00,1988.3,5.5,-47.27,3.87,88.0,0.7
2018-06-23 21:42:00,1980.8,3.3,-47.43,3.8,22.0,2.4
2018-06-23 22:03:00,1988.6,4.4,-46.85,4.17,44.0,1.7
2018-06-23 22:23:00,1994.1,4.4,-47.01,4.15,330.0,1.0
2018-06-23 22:43:00,2007.2,6.4,-46.75,3.94,0.0,1.4
2018-06-23 23:03:00,2007.7,8.5,-47.41,4.21,220.0,1.4
2018-06-23 23:23:00,1999.1,7.7,-47.47,4.5,88.0,1.0
2018-06-23 23:43:00,2024.6,8.1,-46.96,4.1,308.0,0.7
2018-06-24 00:03:00,2008.8,6.8,-46.88,4.01,308.0,1.4
2018-06-24 00:23:00,2030.7,7.7,-47.16,3.98,308.0,1.4
2018-06-24 00:43:00,2035.9,4.6,-46.55,4.22,22.0,1.4
2018-06-24 01:02:00,2023.1,4.3,-46.8,3.89,308.0,1.4
2018-06-24 01:23:00,2029.4,7.3,-47.18,3.92,308.0,0.7
2018-06-24 01:43:00,2034.1,8.0,-47.18,4.04,132.0,0.7
2018-06-24 02:02:00,2043.8,10.6,-47.25,4.04,88.0,0.7
2018-06-24 02:22:00,2060.1,4.9,-47.77,4.14,0.0,0.7
2018-06-24 02:43:00,2054.2,5.1,-47.57,4.04,0.0,0.3
2018-06-24 03:02:00,2057.3,6.2,-47.59,4.35,264.0,1.0
2018-06-24 03:22:00,2038.4,4.7,-47.53,3.84,0.0,1.4
2018-06-24 03:42:00,2037.2,5.0,-47.89,4.19,308.0,1.4
2018-06-24 04:02:00,2055.1,9.6,-47.37,4.23,308.0,1.0
2018-06-24 04:22:00,2061.9,4.8,-47.55,4.18,264.0,1.0
2018-06-24 04:42:00,2077.0,5.4,-47.5,3.91,0.0,0.7
2018-06-24 05:03:00,2081.7,4.7,-47.03,4.01,308.0,0.7
2018-06-24 05:23:00,2052.5,16.7,-47.34,4.21,110.0,1.4
2018-06-24 05:42:00,2041.3,4.7,-47.56,4.02,308.0,0.3
2018-06-24 06:02:00,2055.1,6.1,-47.47,4.14,286.0,1.0
2018-06-24 06:22:00,2038.5,3.3,-47.55,4.03,286.0,1.7
2018-06-24 06:43:00,2039.7,6.8,-47.59,4.35,0.0,0.7
2018-06-24 06:58:00,2053.6,4.6,-47.8,4.21,264.0,0.7
2018-06-24 08:54:00,2047.3,10.6,-47.56,4.3,308.0,1.7
2018-06-24 09:14:00,2042.4,8.3,-47.66,3.91,264.0,1.7
2018-06-24 09:34:00,2050.8,47.3,-46.95,3.62,nan,1.0
2018-06-24 09:53:00,2000.8,5.6,-47.9,4.08,nan,0.7
2018-06-24 10:13:00,2031.0,54.2,-47.24,4.01,308.0,1.0
2018-06-24 10:34:00,1985.2,7.8,-47.25,4.36,308.0,1.4
2018-06-24 10:54:00,2002.3,17.9,-47.05,3.85,220.0,1.4
2018-06-24 11:13:00,1993.2,16.7,-47.33,4.49,308.0,1.0
2018-06-24 11:33:00,1988.8,4.5,-47.36,4.27,132.0,2.7
2018-06-24 11:54:00,1988.2,6.2,-46.9,4.17,110.0,3.4
2018-06-24 12:14:00,1981.5,2.5,-47.59,4.47,330.0,1.7
2018-06-24 12:34:00,1986.2,1.7,-47.56,4.26,88.0,2.4
2018-06-24 12:53:00,1983.4,4.5,-47.44,4.59,308.0,1.0
2018-06-24 13:14:00,1989.9,13.7,-47.34,4.07,88.0,1.4
2018-06-24 13:34:00,1988.0,29.0,-46.79,4.29,0.0,3.1
2018-06-24 13:54:00,1983.4,15.6,-46.86,4.35,88.0,0.3
2018-06-24 14:14:00,1968.7,5.2,-47.49,4.22,220.0,1.0
2018-06-24 14:34:00,2016.2,49.7,-46.63,4.13,0.0,2.0
2018-06-24 14:54:00,1969.2,23.0,-47.48,4.05,0.0,2.4
2018-06-24 15:14:00,1960.0,4.9,-47.4,4.45,308.0,2.0
2018-06-24 15:33:00,1967.1,30.8,-46.5,4.29,198.0,1.4
2018-06-24 15:53:00,1957.0,8.1,-47.01,4.24,0.0,1.4
2018-06-24 16:14:00,1963.6,9.2,-47.35,4.73,132.0,1.4
2018-06-24 16:34:00,1974.1,36.3,-47.0,4.47,154.0,1.0
2018-06-24 16:53:00,1946.0,13.8,-47.29,4.4,264.0,2.4
2018-06-24 17:13:00,1948.4,24.2,-47.4,4.47,220.0,0.7
2018-06-24 17:33:00,2000.1,41.5,-46.89,4.14,0.0,0.3
2018-06-24 17:53:00,2020.7,27.9,-47.15,4.26,286.0,2.0
2018-06-24 18:13:00,2011.7,22.0,-47.36,4.51,44.0,2.4
2018-06-24 18:29:00,1979.1,2.9,-47.34,4.4,132.0,4.8
2018-06-24 20:23:00,2021.6,56.4,-46.33,3.91,88.0,2.4
2018-06-24 20:43:00,1993.0,20.9,-46.89,3.93,132.0,2.4
2018-06-24 21:03:00,2079.3,71.3,-46.31,4.05,176.0,2.4
2018-06-24 21:23:00,2018.2,31.7,-46.55,4.29,88.0,2.7
2018-06-24 21:43:00,2020.7,8.3,-46.68,4.19,88.0,2.4
2018-06-24 22:04:00,2006.8,13.6,-46.4,4.18,88.0,2.0
2018-06-24 22:24:00,1998.7,4.2,-46.56,4.23,132.0,2.7
2018-06-24 22:44:00,1997.9,3.1,-46.16,4.25,88.0,2.4
2018-06-24 23:04:00,1995.9,4.7,-46.25,4.3,0.0,1.0
2018-06-24 23:23:00,2074.2,119.6,-45.99,4.16,132.0,1.4
2018-06-24 23:43:00,2078.6,63.0,-45.25,4.21,132.0,0.7
2018-06-25 00:04:00,2069.3,48.8,-45.82,4.11,132.0,1.0
2018-06-25 00:24:00,2114.7,43.2,-45.44,3.88,132.0,1.0
2018-06-25 00:43:00,2072.1,12.9,-45.98,3.79,132.0,0.3
2018-06-25 01:03:00,2147.1,31.3,-45.77,3.69,220.0,0.3
2018-06-25 01:23:00,2182.1,12.0,-46.22,3.84,176.0,1.4
2018-06-25 01:43:00,2183.5,9.5,-46.0,3.75,286.0,1.0
2018-06-25 02:03:00,2181.1,12.5,-45.74,3.81,220.0,0.0
2018-06-25 02:23:00,2179.9,9.6,-46.05,3.7,264.0,0.3
2018-06-25 02:44:00,2185.7,11.3,-45.9,3.88,220.0,0.7
2018-06-25 03:03:00,2187.9,12.6,-45.77,3.57,220.0,0.7
2018-06-25 03:24:00,2117.1,18.6,-46.34,3.87,220.0,1.4
2018-06-25 03:43:00,2113.7,11.2,-46.49,3.79,264.0,0.7
2018-06-25 04:03:00,2146.9,16.5,-46.64,3.36,220.0,1.7
2018-06-25 04:24:00,2140.7,19.2,-46.7,4.12,264.0,1.4
2018-06-25 04:43:00,2135.6,7.1,-46.29,3.98,264.0,0.3
2018-06-25 05:03:00,2129.9,10.0,-46.53,3.81,264.0,1.4
2018-06-25 05:24:00,2103.9,13.0,-46.81,3.79,220.0,2.0
2018-06-25 05:44:00,2115.2,14.9,-46.56,3.86,308.0,0.7
2018-06-25 06:03:00,2147.1,6.2,-45.71,4.07,264.0,0.0
2018-06-25 06:23:00,2148.7,3.2,-46.2,3.76,308.0,1.4
2018-06-25 06:43:00,2158.6,6.2,-45.78,3.67,264.0,0.7
2018-06-25 06:59:00,2165.7,2.5,-46.15,3.89,176.0,0.7
2018-06-25 08:54:00,2125.5,6.8,-45.75,4.32,220.0,0.3
2018-06-25 09:14:00,2105.5,20.9,-45.94,4.09,88.0,0.7
2018-06-25 09:33:00,2044.2,14.6,-46.13,4.29,132.0,0.3
2018-06-25 09:53:00,2010.4,16.6,-46.4,4.48,220.0,1.0
2018-06-25 10:13:00,2008.0,12.0,-46.21,4.38,176.0,0.7
2018-06-25 10:34:00,1998.3,10.2,-46.75,4.25,264.0,1.4
2018-06-25 10:54:00,1999.7,4.2,-46.41,3.99,308.0,0.7
2018-06-25 11:13:00,1993.6,14.6,-46.3,4.25,88.0,2.7
2018-06-25 11:33:00,1994.1,8.3,-46.31,4.18,44.0,0.7
2018-06-25 11:53:00,2030.5,42.4,-46.14,4.23,242.0,3.4
2018-06-25 12:13:00,1997.0,5.1,-46.44,4.71,88.0,1.4
2018-06-25 12:34:00,1993.5,6.1,-46.41,4.62,0.0,1.4
2018-06-25 12:53:00,1998.9,6.7,-46.66,4.42,220.0,2.0
2018-06-25 13:13:00,1985.4,4.4,-46.69,4.24,0.0,2.4
2018-06-25 13:34:00,1986.6,14.1,-46.82,4.16,88.0,3.1
2018-06-25 13:53:00,1974.6,7.4,-46.48,4.43,264.0,1.0
2018-06-25 14:14:00,1972.9,26.0,-46.79,4.74,264.0,3.4
2018-06-25 14:34:00,1993.0,36.3,-46.48,4.53,0.0,2.7
2018-06-25 14:54:00,2027.8,46.4,-46.34,4.27,88.0,1.7
2018-06-25 15:14:00,1990.3,24.6,-46.83,4.31,264.0,2.0
2018-06-25 15:33:00,1982.4,9.6,-47.31,4.82,308.0,1.7
2018-06-25 15:54:00,1976.1,6.1,-46.9,4.65,176.0,1.0
2018-06-25 16:14:00,2015.5,91.0,-46.64,4.5,264.0,2.4
2018-06-25 16:33:00,1977.3,3.8,-47.13,4.25,176.0,0.7
2018-06-25 16:54:00,1979.2,27.2,-46.72,4.47,308.0,1.7
2018-06-25 17:13:00,1975.3,12.6,-46.8,4.76,88.0,0.3
2018-06-25 17:33:00,1979.3,10.0,-47.37,4.36,0.0,2.0
2018-06-25 17:54:00,1982.2,4.2,-47.32,4.35,0.0,1.7
2018-06-25 18:13:00,1991.0,12.1,-47.26,4.25,44.0,1.0
2018-06-25 18:29:00,2040.2,46.5,-46.58,3.96,88.0,4.4
2018-06-25 20:25:00,2006.0,10.2,-46.36,4.59,264.0,0.3
2018-06-25 20:44:00,2027.5,6.1,-46.52,4.29,308.0,1.7
2018-06-25 21:04:00,2025.4,8.4,-46.68,4.25,220.0,0.7
2018-06-25 21:24:00,2034.5,6.8,-46.61,4.51,220.0,1.4
2018-06-25 21:44:00,2025.1,10.7,-46.54,4.45,220.0,2.0
2018-06-25 22:05:00,2018.1,11.9,-46.28,4.45,308.0,0.7
2018-06-25 22:25:00,2024.9,17.5,-45.59,4.2,264.0,1.0
2018-06-25 22:45:00,2029.8,14.0,-45.5,4.25,220.0,0.7
2018-06-25 23:04:00,2035.2,10.8,-45.8,4.06,0.0,1.4
2018-06-25 23:24:00,2042.2,7.0,-45.51,4.3,132.0,0.7
2018-06-25 23:45:00,2089.3,17.9,-45.93,3.84,264.0,0.0
2018-06-26 00:05:00,2085.0,16.2,-45.84,3.77,220.0,0.7
2018-06-26 00:25:00,2171.8,30.9,-45.95,4.02,88.0,1.4
2018-06-26 00:45:00,2142.9,13.0,-46.55,4.13,132.0,1.7
2018-06-26 01:05:00,2183.4,19.0,-45.88,3.89,176.0,0.7
2018-06-26 01:24:00,2260.9,31.3,-46.57,3.95,132.0,0.7
2018-06-26 01:45:00,2336.1,22.6,-46.67,3.91,88.0,0.3
2018-06-26 02:05:00,2337.3,26.3,-46.46,3.88,264.0,0.0
2018-06-26 02:25:00,2308.6,21.8,-46.45,3.72,308.0,0.0
2018-06-26 02:44:00,2280.8,29.7,-46.38,3.72,308.0,0.3
2018-06-26 03:04:00,2360.0,42.8,-46.27,3.57,264.0,0.3
2018-06-26 03:24:00,2475.5,22.3,-45.56,3.38,308.0,0.7
2018-06-26 03:44:00,2415.1,75.7,-45.6,3.38,308.0,0.7
2018-06-26 04:04:00,2390.3,24.4,-45.63,3.5,0.0,1.0
2018-06-26 04:25:00,2367.7,12.6,-45.76,3.65,44.0,1.0
2018-06-26 04:45:00,2349.3,17.4,-46.02,3.45,88.0,0.3
2018-06-26 05:05:00,2359.9,28.2,-46.31,3.54,88.0,1.0
2018-06-26 05:25:00,2425.9,8.4,-47.21,3.64,286.0,1.7
2018-06-26 05:45:00,2415.3,10.4,-47.25,3.44,88.0,2.4
2018-06-26 06:05:00,2386.5,17.8,-46.84,3.79,88.0,2.4
2018-06-26 06:25:00,2344.4,21.8,-46.9,3.66,110.0,2.0
2018-06-26 06:44:00,2213.7,56.8,-46.28,3.87,88.0,2.0
2018-06-26 07:00:00,2129.7,13.4,-45.9,3.78,132.0,1.4
2018-06-26 08:56:00,1974.0,2.9,-45.22,4.24,88.0,2.0
2018-06-26 09:16:00,2005.2,45.9,-45.05,4.39,44.0,0.7
2018-06-26 09:35:00,2000.5,48.5,-45.67,4.39,308.0,1.0
2018-06-26 09:55:00,2018.5,46.3,-45.56,4.25,132.0,0.7
2018-06-26 10:16:00,2042.1,72.2,-45.76,4.52,308.0,2.4
2018-06-26 10:35:00,2022.7,36.8,-45.6,4.49,132.0,1.4
2018-06-26 10:56:00,2049.1,47.1,-45.89,4.2,264.0,1.7
2018-06-26 11:16:00,2049.7,51.9,-45.92,4.13,132.0,2.0
2018-06-26 11:36:00,2029.6,37.3,-45.78,4.18,88.0,2.4
2018-06-26 11:56:00,2032.6,75.2,-45.65,4.12,88.0,4.1
2018-06-26 12:16:00,2007.6,19.1,-46.0,4.24,286.0,2.7
2018-06-26 12:36:00,2007.2,45.2,-45.69,4.32,132.0,4.1
2018-06-26 12:55:00,2004.1,31.6,-45.24,4.54,88.0,2.7
2018-06-26 13:15:00,2009.0,59.5,-45.39,4.26,132.0,3.1
2018-06-26 13:36:00,2006.0,44.0,-45.36,4.21,286.0,3.1
2018-06-26 13:56:00,2022.1,62.9,-45.58,4.26,88.0,2.4
2018-06-26 14:16:00,2009.4,68.0,-45.38,4.19,176.0,4.1
2018-06-26 14:32:00,1998.3,46.9,-45.59,4.4,88.0,4.4
2018-06-26 16:36:00,2030.3,65.7,-45.64,4.11,88.0,2.7
2018-06-26 16:55:00,2049.9,59.4,-45.84,4.27,88.0,4.4
2018-06-26 17:15:00,1994.9,14.9,-45.82,4.45,132.0,2.4
2018-06-26 17:35:00,2008.8,29.7,-46.14,4.49,88.0,3.7
2018-06-26 17:56:00,1992.5,6.5,-46.36,4.09,0.0,3.4
2018-06-26 18:11:00,1990.9,7.5,-45.91,4.61,110.0,4.8
2018-06-26 20:05:00,1976.4,8.8,-46.34,4.4,88.0,3.7
2018-06-26 20:25:00,1978.7,6.2,-46.39,4.56,88.0,3.4
2018-06-26 20:45:00,2040.6,59.2,-45.82,4.44,44.0,2.7
2018-06-26 21:05:00,2040.6,35.7,-45.82,4.4,88.0,3.7
2018-06-26 21:26:00,2109.2,45.0,-45.46,4.19,0.0,1.7
2018-06-26 21:45:00,2054.0,28.3,-45.82,4.23,132.0,3.4
2018-06-26 22:05:00,2052.7,21.9,-45.99,4.08,88.0,4.1
2018-06-26 22:25:00,2098.3,52.3,-45.83,4.42,0.0,4.4
2018-06-26 22:45:00,2066.5,66.6,-45.4,4.34,44.0,2.4
2018-06-26 23:06:00,2043.4,22.9,-45.84,4.43,132.0,4.4
2018-06-26 23:26:00,2033.6,14.8,-46.23,4.55,88.0,2.4
2018-06-26 23:46:00,2032.9,17.2,-45.79,4.53,308.0,2.0
2018-06-27 00:06:00,2016.4,35.0,-45.92,4.28,88.0,3.7
2018-06-27 00:26:00,2037.8,42.8,-46.0,4.5,308.0,2.7
2018-06-27 00:45:00,2011.9,19.3,-45.56,4.5,88.0,2.0
2018-06-27 01:05:00,2003.3,13.5,-45.82,4.4,88.0,3.1
2018-06-27 01:26:00,1989.3,8.5,-45.73,4.23,176.0,3.1
2018-06-27 01:46:00,2021.4,23.2,-45.81,4.21,88.0,2.0
2018-06-27 02:05:00,2050.6,67.8,-45.76,4.43,88.0,3.4
2018-06-27 02:26:00,2025.2,25.1,-45.64,4.33,132.0,4.4
2018-06-27 02:46:00,2036.2,61.4,-46.05,4.24,88.0,3.1
2018-06-27 03:06:00,1989.8,29.9,-45.41,4.24,0.0,2.4
2018-06-27 03:25:00,2033.5,76.8,-45.35,3.98,88.0,3.4
2018-06-27 03:45:00,1996.7,38.2,-45.21,4.22,44.0,3.1
2018-06-27 04:06:00,2018.9,65.2,-45.25,4.37,44.0,1.4
2018-06-27 04:26:00,1993.9,34.2,-45.44,4.14,132.0,3.1
2018-06-27 04:46:00,2013.0,53.2,-45.28,4.41,132.0,3.1
2018-06-27 05:05:00,1988.6,29.5,-46.05,4.1,88.0,2.4
2018-06-27 05:26:00,1982.1,23.8,-45.54,4.4,88.0,2.7
2018-06-27 05:46:00,1995.7,22.1,-45.23,4.13,132.0,1.0
2018-06-27 06:06:00,1986.8,31.0,-45.4,4.29,264.0,1.4
2018-06-27 06:26:00,1950.4,6.5,-46.16,4.35,264.0,2.7
2018-06-27 06:41:00,1959.8,29.6,-46.04,3.92,88.0,2.4
2018-06-27 08:36:00,1990.5,31.2,-45.82,4.08,308.0,1.4
2018-06-27 08:56:00,1961.2,19.0,-46.02,4.44,132.0,3.1
2018-06-27 09:16:00,1989.7,52.9,-45.54,4.1,308.0,2.7
2018-06-27 09:36:00,1999.5,52.5,-45.82,4.15,308.0,3.4
2018-06-27 09:56:00,1997.7,35.6,-45.9,4.18,88.0,3.4
2018-06-27 10:15:00,1968.9,28.1,-45.4,4.09,44.0,3.4
2018-06-27 10:35:00,2021.8,44.0,-45.07,4.31,88.0,3.4
2018-06-27 10:50:00,1974.3,28.5,-45.84,4.34,264.0,5.8
2018-06-27 11:56:00,1984.9,23.3,-45.0,4.24,308.0,2.7
2018-06-27 12:17:00,1971.8,20.7,-45.74,4.33,88.0,2.7
2018-06-27 12:37:00,1970.3,17.7,-46.37,4.65,132.0,4.1
2018-06-27 12:57:00,1991.6,41.3,-45.88,4.19,nan,1.4
2018-06-27 13:16:00,1993.0,58.8,-46.13,4.15,88.0,3.1
2018-06-27 13:32:00,1960.3,13.0,-46.14,3.9,88.0,2.7
2018-06-27 15:36:00,1980.5,28.2,-46.1,4.08,88.0,3.1
2018-06-27 15:56:00,1975.6,5.9,-46.17,4.11,nan,2.7
2018-06-27 16:15:00,1982.8,5.0,-46.48,4.17,88.0,2.7
2018-06-27 16:35:00,1986.0,6.6,-46.32,4.04,88.0,2.4
2018-06-27 16:56:00,2017.7,49.9,-46.01,4.3,88.0,2.7
2018-06-27 17:11:00,2009.2,28.7,-45.73,4.13,88.0,3.4
2018-06-27 19:05:00,2032.9,21.7,-45.91,4.28,88.0,2.0
2018-06-27 19:26:00,2015.9,15.4,-46.5,4.21,88.0,3.7
2018-06-27 19:45:00,2009.5,15.5,-46.27,4.34,132.0,2.7
2018-06-27 20:05:00,2007.2,20.7,-46.46,4.2,132.0,3.1
2018-06-27 20:26:00,2012.9,7.4,-45.92,4.38,88.0,3.1
2018-06-27 20:46:00,2029.6,36.8,-45.71,3.95,88.0,2.7
2018-06-27 21:06:00,2022.0,11.3,-46.37,4.25,88.0,3.4
2018-06-27 21:26:00,2039.1,18.5,-46.02,4.15,0.0,3.1
2018-06-27 21:46:00,2067.3,26.0,-45.94,4.11,88.0,2.0
2018-06-27 22:06:00,2028.9,9.3,-45.85,4.5,88.0,1.7
2018-06-27 22:26:00,2047.9,35.4,-45.63,4.21,88.0,3.7
2018-06-27 22:46:00,2058.6,34.0,-45.6,4.42,88.0,3.7
2018-06-27 23:06:00,2055.4,59.5,-45.37,4.32,88.0,2.7
2018-06-27 23:25:00,2002.3,44.9,-45.07,4.55,88.0,4.4
2018-06-27 23:45:00,2054.1,70.7,-44.77,4.14,0.0,6.1
2018-06-28 00:06:00,2010.3,51.9,-45.46,4.81,0.0,6.1
2018-06-28 00:25:00,2047.5,52.1,-45.13,4.1,0.0,1.7
2018-06-28 00:45:00,2019.4,57.3,-45.03,4.66,88.0,4.4
2018-06-28 01:06:00,1995.8,31.3,-45.66,4.37,132.0,1.4
2018-06-28 01:26:00,1966.4,8.7,-45.55,4.53,88.0,1.7
2018-06-28 01:46:00,1989.3,35.2,-45.69,4.39,44.0,4.8
2018-06-28 02:06:00,1985.1,21.6,-45.44,4.3,44.0,1.7
2018-06-28 02:26:00,2016.9,45.0,-45.72,3.71,44.0,4.1
2018-06-28 02:45:00,2035.5,70.4,-45.45,4.07,44.0,2.7
2018-06-28 03:05:00,2009.8,53.5,-46.1,3.79,264.0,3.1
2018-06-28 03:26:00,2003.6,67.9,-45.35,4.06,88.0,2.0
2018-06-28 03:46:00,2033.0,47.9,-45.59,4.35,44.0,2.4
2018-06-28 04:06:00,2012.2,73.0,-45.27,4.0,88.0,3.4
2018-06-28 04:25:00,2027.8,51.8,-46.37,4.13,88.0,3.7
2018-06-28 04:46:00,2014.3,46.8,-46.26,4.24,286.0,3.1
2018-06-28 05:06:00,2035.2,54.4,-45.39,4.34,308.0,2.4
2018-06-28 05:25:00,2003.1,22.5,-46.17,4.36,0.0,2.0
2018-06-28 05:41:00,1976.3,1.7,-46.08,4.48,242.0,2.7
2018-06-28 07:35:00,1996.5,1.3,-45.71,3.77,88.0,2.7
2018-06-28 07:56:00,2018.5,22.3,-45.75,4.1,264.0,2.0
2018-06-28 08:15:00,2070.7,55.8,-46.18,4.07,264.0,2.0
2018-06-28 08:35:00,2067.2,54.9,-46.0,4.07,0.0,2.7
2018-06-28 08:55:00,2009.8,31.9,-45.69,4.68,0.0,3.4
2018-06-28 09:16:00,2010.5,14.9,-45.64,4.18,nan,2.7
2018-06-28 09:31:00,1991.1,1.8,-46.75,4.17,88.0,3.1
2018-06-28 11:56:00,1989.2,11.3,-45.48,4.3,88.0,2.0
2018-06-28 12:16:00,2006.4,41.5,-45.7,4.29,0.0,3.7
2018-06-28 12:36:00,2025.2,67.8,-46.08,4.34,110.0,3.7
2018-06-28 12:56:00,1979.0,8.7,-46.23,4.27,0.0,3.4
2018-06-28 13:16:00,1998.4,44.7,-45.46,4.18,88.0,3.1
2018-06-28 13:31:00,2006.9,41.5,-46.78,4.14,nan,2.4
2018-06-28 15:25:00,2054.3,62.4,-45.62,4.01,88.0,1.0
2018-06-28 15:45:00,2069.5,73.2,-45.52,4.29,0.0,5.1
2018-06-28 16:06:00,2073.5,70.7,-45.61,4.02,88.0,4.4
2018-06-28 16:26:00,2037.9,53.1,-45.85,4.37,nan,4.4
2018-06-28 16:46:00,1995.6,27.9,-46.16,4.08,308.0,6.1
2018-06-28 17:05:00,2031.3,58.6,-46.04,4.02,88.0,2.7
2018-06-28 17:26:00,1975.3,14.2,-45.72,4.35,88.0,4.4
2018-06-28 17:45:00,2002.1,63.7,-45.76,4.41,132.0,4.8
2018-06-28 18:05:00,1993.7,42.9,-46.19,4.16,44.0,3.1
2018-06-28 18:25:00,2066.8,54.2,-45.58,3.97,88.0,3.1
2018-06-28 18:45:00,2069.9,52.9,-45.66,4.09,308.0,5.1
2018-06-28 19:05:00,2085.3,57.5,-46.03,4.13,0.0,3.7
2018-06-28 19:25:00,2032.6,73.2,-45.95,3.97,176.0,3.4
2018-06-28 19:45:00,2046.0,66.4,-45.78,4.16,44.0,4.8
2018-06-28 20:05:00,2069.5,56.1,-45.72,3.97,88.0,4.1
2018-06-28 20:25:00,2052.2,52.2,-45.47,4.05,44.0,2.7
2018-06-28 20:46:00,2052.8,48.0,-45.76,4.09,44.0,2.4
2018-06-28 21:06:00,2045.9,44.9,-45.94,4.05,44.0,2.7
2018-06-28 21:26:00,2066.1,56.0,-45.53,4.1,88.0,3.1
2018-06-28 21:46:00,2003.2,32.1,-46.63,4.37,44.0,2.0
2018-06-28 22:05:00,1999.8,28.1,-46.13,4.49,88.0,4.1
2018-06-28 22:25:00,2037.8,52.4,-45.86,4.0,0.0,2.4
2018-06-28 22:45:00,2009.8,54.4,-45.62,4.19,88.0,2.7
2018-06-28 23:06:00,1992.4,20.6,-46.21,4.41,44.0,2.7
2018-06-28 23:26:00,2080.5,76.0,-45.49,4.28,44.0,3.7
2018-06-28 23:46:00,2077.8,74.8,-45.57,3.99,44.0,2.7
2018-06-29 00:06:00,1994.4,21.4,-45.88,4.21,264.0,3.1
2018-06-29 00:25:00,2003.7,25.8,-46.02,4.27,0.0,1.0
2018-06-29 00:46:00,2004.5,33.7,-45.99,4.37,44.0,1.7
2018-06-29 01:06:00,2005.4,24.0,-46.47,4.21,44.0,3.7
2018-06-29 01:26:00,1982.5,8.3,-46.6,4.28,88.0,1.4
2018-06-29 01:46:00,1985.6,9.7,-46.32,4.56,44.0,2.7
2018-06-29 02:01:00,1991.4,3.6,-46.84,3.98,264.0,3.7
2018-06-29 03:56:00,1999.4,3.5,-46.45,4.1,88.0,2.7
2018-06-29 04:15:00,2004.0,5.9,-46.71,4.05,88.0,1.0
2018-06-29 04:35:00,2007.7,3.3,-46.98,4.27,88.0,2.7
2018-06-29 04:56:00,1997.4,9.4,-47.08,4.26,0.0,2.0
2018-06-29 05:15:00,2010.7,29.8,-46.72,4.3,0.0,1.7
2018-06-29 05:35:00,1988.6,4.1,-46.7,4.29,88.0,3.4
2018-06-29 05:55:00,1988.7,2.7,-46.58,4.22,132.0,0.3
2018-06-29 06:15:00,1989.5,1.7,-46.51,4.44,308.0,2.0
2018-06-29 06:36:00,1978.9,7.0,-46.61,4.1,88.0,3.4
2018-06-29 06:56:00,1972.9,2.6,-46.24,4.38,132.0,4.4
2018-06-29 07:15:00,1974.9,2.3,-46.8,4.07,264.0,4.4
2018-06-29 07:36:00,1985.4,12.2,-46.49,4.19,88.0,4.1
2018-06-29 07:56:00,2026.6,88.2,-46.39,4.14,330.0,2.0
2018-06-29 08:15:00,2063.2,80.5,-46.01,3.93,88.0,2.7
2018-06-29 08:35:00,1981.8,3.8,-47.01,4.39,264.0,3.7
2018-06-29 08:56:00,1970.1,3.1,-46.67,4.38,308.0,2.4
2018-06-29 09:16:00,1979.7,15.5,-46.53,4.23,176.0,1.7
2018-06-29 09:35:00,1988.6,19.1,-46.17,4.25,0.0,3.4
2018-06-29 09:55:00,1975.4,7.6,-46.67,4.37,286.0,1.4
2018-06-29 10:16:00,2007.1,60.5,-46.45,4.2,nan,3.7
2018-06-29 10:36:00,2020.7,79.2,-46.4,4.58,286.0,2.0
2018-06-29 10:55:00,2000.3,37.7,-46.02,4.15,88.0,3.7
2018-06-29 11:15:00,2024.1,71.8,-46.66,4.22,0.0,2.4
2018-06-29 11:35:00,1989.1,60.6,-46.23,4.28,nan,3.4
2018-06-29 11:56:00,1948.9,8.9,-47.06,4.49,88.0,3.7
2018-06-29 12:16:00,2011.9,82.1,-45.86,4.19,176.0,4.1
2018-06-29 12:35:00,2051.0,80.2,-45.91,3.91,88.0,4.4
2018-06-29 12:56:00,1993.7,82.9,-46.14,4.07,nan,2.0
2018-06-29 13:16:00,2030.0,80.4,-46.37,4.4,nan,3.1
2018-06-29 13:31:00,1974.6,39.9,-46.83,3.99,nan,3.7
2018-06-29 15:27:00,1993.1,76.1,-45.94,4.17,nan,3.1
2018-06-29 15:47:00,2009.2,61.6,-46.4,4.05,220.0,1.4
2018-06-29 16:07:00,1988.6,63.8,-46.04,4.21,88.0,3.1
2018-06-29 16:26:00,1997.1,41.9,-46.73,4.14,nan,1.7
2018-06-29 16:46:00,1980.6,13.7,-46.55,4.14,88.0,4.1
2018-06-29 17:07:00,1989.3,26.8,-46.68,4.17,132.0,4.4
2018-06-29 17:27:00,1991.0,15.0,-46.71,4.03,132.0,3.1
2018-06-29 17:46:00,2013.4,49.2,-46.61,4.14,132.0,4.1
2018-06-29 18:06:00,1985.7,24.1,-46.53,4.26,88.0,4.1
2018-06-29 18:27:00,1986.1,9.2,-46.93,4.03,132.0,2.0
2018-06-29 18:47:00,1992.7,7.3,-46.93,4.0,88.0,2.4
2018-06-29 19:07:00,2012.9,8.2,-47.22,4.05,132.0,2.4
2018-06-29 19:26:00,2020.4,5.9,-47.2,3.72,88.0,3.1
2018-06-29 19:47:00,2015.2,6.4,-46.78,4.08,88.0,2.7
2018-06-29 20:07:00,2030.6,17.5,-47.07,4.03,88.0,2.4
2018-06-29 20:26:00,2057.9,35.5,-47.07,3.94,0.0,1.4
2018-06-29 20:46:00,2100.6,62.3,-46.41,4.2,132.0,1.4
2018-06-29 21:06:00,2092.4,50.6,-46.49,4.09,308.0,2.7
2018-06-29 21:26:00,1993.8,2.4,-47.2,4.3,0.0,2.4
2018-06-29 21:46:00,2001.8,8.3,-46.85,4.2,110.0,1.0
2018-06-29 22:07:00,2023.9,32.5,-46.67,4.14,88.0,3.1
2018-06-29 22:27:00,2001.2,14.7,-46.87,4.18,132.0,2.7
2018-06-29 22:46:00,1983.8,4.7,-46.83,4.35,44.0,2.7
2018-06-29 23:06:00,1986.0,6.8,-46.47,4.03,154.0,1.0
2018-06-29 23:26:00,1980.9,4.1,-46.84,4.28,88.0,2.4
2018-06-29 23:46:00,1968.9,3.5,-46.67,4.58,44.0,2.4
2018-06-30 00:06:00,1973.8,12.4,-46.39,4.29,88.0,2.0
2018-06-30 00:26:00,1976.7,10.5,-46.72,4.45,88.0,3.1
2018-06-30 00:46:00,1983.0,13.0,-46.08,4.45,0.0,1.4
2018-06-30 01:07:00,1977.1,16.0,-46.54,4.15,44.0,4.4
2018-06-30 01:27:00,2041.4,89.4,-46.02,4.43,132.0,5.1
2018-06-30 01:47:00,1960.0,7.1,-46.45,4.49,0.0,3.1
2018-06-30 02:02:00,1958.6,1.9,-46.36,4.81,44.0,2.7
2018-06-30 03:56:00,1979.0,29.3,-46.26,4.52,0.0,2.7
2018-06-30 04:16:00,1958.1,18.1,-46.6,4.1,44.0,2.0
2018-06-30 04:37:00,1958.5,17.2,-46.64,4.19,0.0,2.0
2018-06-30 04:57:00,2053.5,62.3,-45.93,4.3,88.0,4.1
2018-06-30 05:17:00,2012.6,55.1,-46.35,4.33,0.0,4.1
2018-06-30 05:37:00,1946.4,5.7,-46.39,4.56,220.0,2.4
2018-06-30 05:57:00,1951.0,20.6,-46.38,4.52,0.0,2.7
2018-06-30 06:16:00,1946.0,3.2,-46.38,4.36,330.0,2.0
2018-06-30 06:36:00,1957.9,37.4,-46.74,4.2,110.0,2.0
2018-06-30 06:57:00,1950.2,13.9,-47.11,4.3,308.0,1.4
2018-06-30 07:16:00,1967.0,43.1,-46.42,4.52,88.0,2.4
2018-06-30 07:37:00,2042.9,49.9,-45.85,4.1,308.0,0.7
2018-06-30 07:57:00,2032.1,57.7,-46.27,4.11,88.0,3.1
2018-06-30 08:17:00,2005.3,66.3,-46.27,4.13,0.0,3.4
2018-06-30 08:37:00,2004.5,50.9,-46.86,4.19,308.0,3.1
2018-06-30 08:57:00,2032.9,36.8,-46.13,3.99,264.0,2.4
2018-06-30 09:16:00,2080.3,84.7,-45.96,4.09,264.0,2.0
2018-06-30 09:36:00,2020.4,61.4,-46.45,4.55,88.0,2.7
2018-06-30 09:56:00,2018.5,68.5,-46.71,4.49,308.0,2.4
2018-06-30 10:17:00,1976.8,15.0,-46.82,4.12,0.0,2.4
2018-06-30 10:36:00,1992.4,37.3,-46.58,4.26,88.0,2.7
2018-06-30 10:57:00,2000.7,53.5,-46.61,4.32,264.0,1.7
2018-06-30 11:16:00,2030.1,87.7,-46.46,4.14,110.0,2.4
2018-06-30 11:36:00,2030.2,55.9,-46.27,4.15,154.0,2.7
2018-06-30 11:57:00,1989.0,49.9,-46.94,4.43,132.0,3.7
2018-06-30 12:17:00,2034.4,86.4,-46.22,4.31,264.0,5.8
2018-06-30 12:37:00,1974.8,49.1,-46.75,4.42,88.0,5.8
2018-06-30 12:57:00,1972.9,37.3,-46.37,4.51,0.0,1.7
2018-06-30 13:17:00,1973.5,45.0,-46.63,4.32,88.0,5.4
2018-06-30 13:32:00,1981.6,34.1,-46.36,3.65,0.0,5.4
2018-06-30 15:27:00,2001.2,7.6,-47.08,4.24,88.0,5.8
2018-06-30 15:47:00,1995.1,50.2,-47.03,4.26,88.0,4.4
2018-06-30 16:07:00,2008.2,77.1,-46.85,4.17,88.0,4.1
2018-06-30 16:28:00,1979.7,13.6,-46.87,3.97,132.0,5.4
2018-06-30 16:47:00,1987.7,21.0,-47.16,4.04,88.0,5.8
2018-06-30 17:07:00,1988.2,21.3,-47.1,4.33,88.0,5.1
2018-06-30 17:27:00,2055.1,76.1,-46.71,4.25,88.0,4.1
2018-06-30 17:47:00,2086.6,79.8,-46.22,3.85,286.0,4.4
2018-06-30 18:08:00,2001.9,41.6,-46.91,4.11,88.0,4.4
2018-06-30 18:27:00,1967.6,9.1,-47.04,4.19,132.0,3.7
2018-06-30 18:47:00,1975.4,11.5,-46.8,4.23,132.0,3.1
2018-06-30 19:07:00,1995.0,28.6,-46.86,4.07,132.0,3.4
2018-06-30 19:27:00,2077.2,68.3,-46.81,4.08,88.0,4.1
2018-06-30 19:47:00,2057.8,60.5,-46.69,4.03,88.0,3.7
2018-06-30 20:07:00,2040.8,46.0,-46.91,3.9,44.0,2.4
2018-06-30 20:27:00,2071.5,41.1,-46.71,4.09,44.0,3.1
2018-06-30 20:47:00,2103.7,59.8,-46.23,4.22,44.0,5.1
2018-06-30 21:07:00,2071.0,44.5,-46.56,4.31,44.0,4.8
2018-06-30 21:27:00,2060.4,52.5,-46.29,4.01,88.0,4.8
2018-06-30 21:47:00,2066.2,49.4,-47.07,4.41,22.0,5.1
2018-06-30 22:07:00,2065.7,47.8,-46.97,4.25,88.0,3.1
2018-06-30 22:28:00,2082.3,42.3,-46.85,3.98,88.0,3.4
2018-06-30 22:47:00,2091.2,66.6,-46.64,4.13,132.0,1.4
2018-06-30 23:08:00,2079.9,45.1,-46.37,3.99,44.0,6.1
2018-06-30 23:28:00,2049.6,38.9,-46.69,4.26,44.0,5.1
2018-06-30 23:47:00,2064.7,38.9,-46.35,4.14,0.0,3.1
2018-07-01 00:07:00,2036.8,5.7,-47.05,4.67,88.0,2.0
2018-07-01 00:27:00,2047.6,12.0,-46.51,4.2,88.0,1.0
2018-07-01 00:47:00,2062.2,39.3,-46.39,4.23,44.0,2.0
2018-07-01 01:08:00,2032.7,7.7,-46.28,4.32,44.0,4.1
2018-07-01 01:27:00,2048.1,17.4,-47.26,4.37,132.0,2.0
2018-07-01 01:48:00,2061.1,6.1,-46.6,4.06,88.0,1.4
2018-07-01 02:03:00,2058.6,3.8,-46.2,4.11,264.0,2.7
2018-07-01 03:57:00,2101.4,18.1,-46.68,4.22,330.0,2.4
2018-07-01 04:17:00,2092.8,4.1,-46.59,4.04,264.0,2.0
2018-07-01 04:37:00,2097.5,2.1,-47.14,3.87,264.0,0.7
2018-07-01 04:57:00,2101.4,4.2,-46.54,4.18,88.0,1.4
2018-07-01 05:17:00,2120.4,15.4,-46.85,3.97,264.0,0.7
2018-07-01 05:38:00,2137.5,38.9,-46.83,3.89,0.0,1.0
2018-07-01 05:58:00,2157.4,55.1,-46.11,3.78,0.0,2.0
2018-07-01 06:17:00,2155.2,44.6,-46.85,3.77,88.0,3.1
2018-07-01 06:38:00,2188.4,30.3,-46.05,3.63,286.0,2.0
2018-07-01 06:58:00,2254.4,95.2,-45.99,3.61,286.0,1.7
2018-07-01 07:17:00,2145.7,42.5,-46.85,3.6,88.0,1.4
2018-07-01 07:37:00,2152.8,28.0,-46.21,3.98,88.0,3.4
2018-07-01 07:58:00,2126.8,29.3,-46.42,3.86,88.0,3.1
2018-07-01 08:18:00,2160.9,57.4,-46.36,4.11,nan,2.7
2018-07-01 08:38:00,2154.3,72.5,-46.56,4.11,88.0,2.4
2018-07-01 08:58:00,2084.4,8.5,-46.7,3.73,154.0,2.4
2018-07-01 09:17:00,2116.0,27.2,-46.24,4.1,220.0,3.7
2018-07-01 09:37:00,2178.8,89.8,-46.08,3.72,88.0,3.4
2018-07-01 09:57:00,2141.2,59.3,-45.97,4.32,88.0,4.1
2018-07-01 10:17:00,2066.7,22.4,-46.31,4.23,nan,3.4
2018-07-01 10:37:00,2105.0,54.7,-46.04,3.61,88.0,3.7
2018-07-01 10:58:00,2118.2,38.0,-45.48,3.8,88.0,3.7
2018-07-01 11:18:00,2099.8,53.7,-45.96,4.1,88.0,3.7
2018-07-01 11:37:00,2044.1,17.5,-47.1,3.85,88.0,3.7
2018-07-01 11:57:00,2042.3,11.5,-46.43,4.26,88.0,2.7
2018-07-01 12:17:00,2054.0,33.0,-46.48,4.43,88.0,4.4
2018-07-01 12:37:00,2070.9,43.4,-46.57,3.98,nan,2.4
2018-07-01 12:57:00,2060.6,52.1,-46.49,4.06,330.0,3.7
2018-07-01 13:17:00,2062.5,31.2,-46.61,4.2,88.0,6.1
2018-07-01 13:33:00,2071.5,37.5,-46.08,4.21,nan,3.1
2018-07-01 15:28:00,2058.7,22.2,-45.98,3.96,176.0,4.4
2018-07-01 15:48:00,2074.4,36.0,-46.03,4.03,88.0,5.1
2018-07-01 16:09:00,2083.7,70.1,-46.41,4.06,88.0,4.1
2018-07-01 16:28:00,2089.1,53.2,-46.14,3.95,308.0,3.1
2018-07-01 16:48:00,2064.2,47.8,-46.54,3.88,176.0,3.1
2018-07-01 17:09:00,2077.8,53.6,-46.07,3.78,88.0,3.7
2018-07-01 17:28:00,2040.6,23.6,-46.44,3.85,88.0,3.4
2018-07-01 17:49:00,2119.4,37.4,-46.0,3.96,132.0,3.4
2018-07-01 18:09:00,2058.7,25.0,-46.51,4.05,88.0,1.7
2018-07-01 18:28:00,2076.4,44.1,-46.52,3.82,264.0,4.4
2018-07-01 18:49:00,2115.9,69.8,-45.31,3.82,0.0,1.7
2018-07-01 19:08:00,2134.7,71.4,-45.52,3.99,132.0,3.7
2018-07-01 19:28:00,2133.3,48.0,-45.95,3.75,0.0,4.1
2018-07-01 19:49:00,2127.5,48.7,-45.36,3.89,264.0,2.0
2018-07-01 20:08:00,2119.5,43.9,-45.6,3.97,44.0,5.8
2018-07-01 20:28:00,2160.9,50.8,-45.68,3.78,44.0,3.7
2018-07-01 20:48:00,2153.1,68.2,-45.93,3.72,88.0,4.1
2018-07-01 21:08:00,2111.7,55.0,-46.34,4.02,44.0,4.4
2018-07-01 21:28:00,2055.5,41.7,-46.56,4.19,88.0,3.7
2018-07-01 21:49:00,2141.4,71.7,-45.99,4.14,44.0,6.1
2018-07-01 22:09:00,2056.5,53.6,-46.21,4.16,88.0,4.4
2018-07-01 22:28:00,2064.5,37.8,-46.25,3.99,44.0,1.4
2018-07-01 22:48:00,2141.9,76.2,-45.75,4.09,88.0,3.4
2018-07-01 23:09:00,2051.7,25.6,-46.43,3.82,44.0,3.4
2018-07-01 23:28:00,2033.9,35.0,-46.48,4.22,44.0,4.8
2018-07-01 23:49:00,2089.9,64.2,-45.92,4.27,88.0,2.4
2018-07-02 00:09:00,2088.5,56.7,-46.22,3.81,44.0,3.4
2018-07-02 00:29:00,2052.0,23.5,-46.12,4.16,88.0,4.1
2018-07-02 00:49:00,2069.5,52.4,-46.29,4.06,264.0,3.1
2018-07-02 01:09:00,2042.2,25.5,-46.78,4.04,88.0,3.4
2018-07-02 01:29:00,2051.1,47.2,-46.66,3.9,88.0,2.7
2018-07-02 01:48:00,2055.9,36.1,-46.64,4.03,88.0,3.7
2018-07-02 02:04:00,2049.4,37.7,-46.38,4.21,264.0,2.4
2018-07-02 03:58:00,2065.3,20.8,-46.54,4.11,308.0,1.7
2018-07-02 04:18:00,2068.5,28.1,-46.62,3.75,0.0,2.4
2018-07-02 04:39:00,2053.0,9.5,-46.48,4.57,0.0,2.7
2018-07-02 04:59:00,2056.8,7.5,-46.87,4.15,88.0,1.4
2018-07-02 05:19:00,2094.2,34.7,-46.66,4.03,88.0,1.7
2018-07-02 05:39:00,2113.2,51.9,-46.45,4.0,44.0,1.4
2018-07-02 05:58:00,2078.2,10.7,-46.96,3.77,88.0,1.7
2018-07-02 06:18:00,2120.9,59.8,-46.66,3.85,88.0,2.4
2018-07-02 06:39:00,2144.2,47.5,-46.26,4.04,286.0,3.4
2018-07-02 06:59:00,2127.4,43.2,-46.69,3.94,88.0,2.0
2018-07-02 07:18:00,2196.5,97.1,-46.18,3.82,132.0,3.4
2018-07-02 07:38:00,2150.2,55.9,-46.41,3.83,88.0,3.7
2018-07-02 07:59:00,2129.9,55.0,-46.88,3.63,220.0,3.4
2018-07-02 08:19:00,2154.2,108.4,-46.12,3.7,0.0,5.1
2018-07-02 08:38:00,2095.2,61.8,-46.4,3.73,0.0,3.4
2018-07-02 08:59:00,2116.3,66.2,-46.09,4.0,286.0,7.5
2018-07-02 09:18:00,2163.4,90.4,-45.97,3.7,0.0,5.4
2018-07-02 09:38:00,2098.5,56.4,-46.29,4.1,88.0,2.7
2018-07-02 09:58:00,2036.0,44.9,-46.29,3.93,308.0,3.1
2018-07-02 10:18:00,2075.7,90.3,-46.61,3.89,286.0,3.7
2018-07-02 10:38:00,2052.0,51.0,-46.32,4.1,88.0,3.4
2018-07-02 10:59:00,2062.5,59.3,-46.24,3.94,88.0,3.4
2018-07-02 11:19:00,2023.7,48.4,-46.67,4.0,0.0,5.8
2018-07-02 11:38:00,2001.3,31.0,-46.64,4.17,88.0,6.8
2018-07-02 11:59:00,2012.4,29.5,-46.21,4.04,132.0,4.8
2018-07-02 12:19:00,1990.2,11.6,-46.15,4.06,110.0,4.8
2018-07-02 12:38:00,2041.4,52.5,-46.17,3.99,88.0,6.5
2018-07-02 12:59:00,2064.6,52.2,-46.42,4.14,44.0,5.1
2018-07-02 13:18:00,2071.1,71.5,-46.25,3.93,44.0,6.1
2018-07-02 13:34:00,2067.6,73.4,-45.83,4.09,88.0,4.8
2018-07-02 15:29:00,2048.1,73.6,-45.8,4.09,44.0,4.8
2018-07-02 15:49:00,2063.9,66.6,-46.3,3.84,88.0,5.4
2018-07-02 16:09:00,2073.7,53.8,-46.66,3.95,220.0,2.0
2018-07-02 16:30:00,2107.3,87.5,-46.26,4.11,132.0,3.4
2018-07-02 16:50:00,2087.7,70.1,-46.45,3.94,88.0,3.7
2018-07-02 17:09:00,2044.9,64.8,-46.0,4.37,132.0,2.0
2018-07-02 17:29:00,2028.5,56.3,-47.15,4.07,132.0,4.4
2018-07-02 17:49:00,2071.9,70.9,-46.2,3.97,132.0,4.4
2018-07-02 18:09:00,2025.6,43.4,-46.35,4.06,44.0,4.1
2018-07-02 18:30:00,2021.0,46.1,-46.64,4.12,44.0,5.1
2018-07-02 18:49:00,2031.0,32.4,-45.59,4.06,44.0,5.1
2018-07-02 19:09:00,2043.0,57.8,-46.36,4.36,198.0,4.1
2018-07-02 19:29:00,2147.7,79.3,-45.79,4.18,44.0,5.8
2018-07-02 19:49:00,2092.7,62.8,-45.54,3.82,220.0,3.7
2018-07-02 20:09:00,2096.7,36.7,-45.87,4.0,44.0,6.1
2018-07-02 20:30:00,2116.1,66.8,-45.25,3.9,88.0,4.8
2018-07-02 20:49:00,2049.7,53.9,-45.94,3.86,0.0,5.1
2018-07-02 21:09:00,2061.9,52.4,-45.71,3.97,0.0,5.8
2018-07-02 21:30:00,2096.3,73.8,-45.54,3.84,110.0,5.4
2018-07-02 21:49:00,2043.2,45.7,-45.97,4.37,88.0,4.8
2018-07-02 22:09:00,2039.8,60.5,-45.69,4.27,44.0,4.4
2018-07-02 22:30:00,2067.3,61.9,-45.95,4.51,88.0,5.4
2018-07-02 22:50:00,2061.0,48.6,-45.64,4.06,88.0,5.8
2018-07-02 23:10:00,2056.1,30.4,-46.11,4.65,44.0,4.4
2018-07-02 23:29:00,2080.8,51.8,-45.4,4.23,44.0,6.8
2018-07-02 23:49:00,2023.4,44.6,-45.77,4.53,88.0,2.7
2018-07-03 00:09:00,2039.5,42.6,-45.4,4.26,88.0,4.8
2018-07-03 00:30:00,2077.7,58.4,-45.67,3.98,44.0,6.8
2018-07-03 00:49:00,2063.6,51.0,-45.28,4.66,88.0,4.1
2018-07-03 01:09:00,2064.1,35.5,-45.58,4.48,88.0,4.8
2018-07-03 01:29:00,2037.5,49.5,-45.17,4.26,88.0,2.7
2018-07-03 01:49:00,2077.4,57.5,-45.41,4.29,44.0,5.8
2018-07-03 02:05:00,2070.4,53.1,-45.25,4.21,330.0,2.7
2018-07-03 03:59:00,2037.0,36.7,-45.65,4.37,0.0,4.4
2018-07-03 04:19:00,2105.6,52.4,-45.02,4.32,0.0,3.7
2018-07-03 04:39:00,2058.4,48.7,-45.46,4.02,132.0,4.1
2018-07-03 05:00:00,2052.7,34.4,-45.39,4.38,44.0,5.4
2018-07-03 05:20:00,2079.4,49.5,-45.39,4.22,0.0,3.4
2018-07-03 05:39:00,2153.2,70.7,-44.45,4.0,88.0,5.1
2018-07-03 05:59:00,2124.9,60.9,-45.13,4.16,44.0,3.7
2018-07-03 06:20:00,2103.1,52.3,-44.91,4.26,176.0,3.4
2018-07-03 06:40:00,2128.8,51.6,-44.69,3.65,88.0,2.0
2018-07-03 07:00:00,2092.6,63.5,-45.11,3.86,44.0,2.4
2018-07-03 07:19:00,2151.1,59.8,-44.29,3.77,44.0,3.1
2018-07-03 07:39:00,2135.4,75.1,-44.26,4.19,88.0,6.5
2018-07-03 07:59:00,2152.3,75.2,-44.49,4.04,44.0,4.4
2018-07-03 08:19:00,2127.9,82.6,-44.8,3.94,88.0,3.7
2018-07-03 08:39:00,2084.0,69.1,-44.35,3.76,88.0,3.7
2018-07-03 08:59:00,2062.4,49.3,-44.63,4.09,88.0,6.8
2018-07-03 09:20:00,2062.6,47.7,-44.95,4.2,308.0,9.5
2018-07-03 09:40:00,2021.5,57.5,-44.88,4.42,132.0,3.1
2018-07-03 09:59:00,2049.0,62.6,-45.21,3.88,88.0,4.4
2018-07-03 10:19:00,2059.4,92.9,-45.28,4.11,88.0,3.7
2018-07-03 10:39:00,2028.0,69.0,-45.33,4.21,88.0,4.4
2018-07-03 10:59:00,2047.5,69.3,-45.15,4.06,286.0,6.5
2018-07-03 11:19:00,1982.8,21.3,-45.96,4.4,88.0,4.8
2018-07-03 11:39:00,1994.9,51.1,-45.63,4.21,132.0,4.4
2018-07-03 12:00:00,2028.1,63.7,-45.18,4.04,286.0,8.5
2018-07-03 12:20:00,1984.7,34.4,-45.9,4.39,110.0,4.4
2018-07-03 12:39:00,1948.3,2.8,-45.91,4.5,88.0,5.1
2018-07-03 12:59:00,1990.9,55.6,-45.57,4.27,44.0,5.4
2018-07-03 13:19:00,1958.8,26.3,-46.1,4.32,176.0,5.1
2018-07-03 13:35:00,1989.6,60.7,-45.99,3.98,154.0,3.4
2018-07-03 15:31:00,1956.7,7.0,-45.7,4.19,88.0,4.4
2018-07-03 15:51:00,1990.3,54.2,-45.97,4.03,110.0,5.1
2018-07-03 16:11:00,1966.5,14.8,-45.56,4.78,88.0,3.4
2018-07-03 16:31:00,1966.9,14.0,-45.95,4.35,88.0,3.7
2018-07-03 16:50:00,1986.9,58.1,-45.89,4.4,88.0,5.1
2018-07-03 17:10:00,1977.9,17.8,-46.11,4.14,88.0,5.8
2018-07-03 17:30:00,2018.4,56.5,-45.96,4.11,88.0,5.1
2018-07-03 17:51:00,2009.4,61.1,-45.51,4.34,88.0,4.4
2018-07-03 18:11:00,2002.9,39.3,-45.86,4.21,132.0,3.7
2018-07-03 18:30:00,2022.1,50.8,-45.9,4.16,132.0,3.1
2018-07-03 18:51:00,1999.7,41.1,-45.72,4.17,88.0,5.8
2018-07-03 19:11:00,1992.6,25.7,-45.78,4.4,132.0,5.8
2018-07-03 19:31:00,1976.9,7.5,-46.28,4.45,88.0,2.7
2018-07-03 19:50:00,1980.9,7.6,-46.63,4.16,44.0,2.7
2018-07-03 20:10:00,1980.1,6.5,-46.4,4.56,88.0,3.7
2018-07-03 20:31:00,2007.2,41.5,-46.17,4.1,88.0,3.7
2018-07-03 20:51:00,2034.4,35.6,-46.02,4.57,264.0,4.1
2018-07-03 21:10:00,2020.6,27.8,-45.23,4.43,44.0,2.4
2018-07-03 21:30:00,2039.1,51.2,-46.05,4.16,44.0,2.7
2018-07-03 21:51:00,2099.7,102.0,-46.09,4.29,88.0,1.7
2018-07-03 22:10:00,2070.0,45.4,-45.71,4.34,132.0,2.4
2018-07-03 22:30:00,2058.0,37.4,-45.5,4.17,88.0,2.4
2018-07-03 22:50:00,2032.4,42.8,-45.64,4.44,22.0,3.4
2018-07-03 23:11:00,2031.1,22.4,-45.76,4.17,132.0,3.1
2018-07-03 23:30:00,2072.6,47.9,-45.71,4.22,88.0,3.1
2018-07-03 23:51:00,2051.3,56.7,-45.73,4.32,88.0,3.7
2018-07-04 00:11:00,2022.3,8.7,-46.21,4.35,176.0,2.4
2018-07-04 00:30:00,2051.4,46.2,-45.99,4.56,88.0,2.0
2018-07-04 00:50:00,2032.8,22.7,-46.18,4.16,44.0,2.4
2018-07-04 01:10:00,2014.8,12.2,-45.47,4.44,88.0,4.1
2018-07-04 01:30:00,2023.7,16.1,-45.76,4.09,132.0,2.7
2018-07-04 01:51:00,2064.8,47.1,-45.89,4.25,44.0,3.1
2018-07-04 02:06:00,2050.9,50.2,-46.05,3.92,44.0,3.4
2018-07-04 04:01:00,1983.7,11.2,-45.41,4.54,242.0,0.7
2018-07-04 04:22:00,1996.6,45.0,-45.73,4.38,220.0,2.0
2018-07-04 04:41:00,1998.7,34.2,-45.63,4.47,88.0,1.4
2018-07-04 05:02:00,1973.0,13.2,-45.62,4.63,264.0,2.4
2018-07-04 05:22:00,2002.0,25.2,-46.02,4.19,88.0,1.7
2018-07-04 05:41:00,2012.2,37.8,-45.54,4.33,88.0,2.4
2018-07-04 06:01:00,1994.0,36.2,-45.58,4.12,308.0,4.1
2018-07-04 06:21:00,1979.9,12.6,-45.65,4.44,330.0,2.0
2018-07-04 06:41:00,2009.2,30.8,-45.0,3.89,nan,1.7
2018-07-04 07:01:00,2055.6,68.6,-45.07,4.12,264.0,3.7
2018-07-04 07:22:00,2013.1,76.3,-45.74,4.37,0.0,2.0
2018-07-04 07:42:00,2036.0,62.1,-45.27,3.94,88.0,2.0
2018-07-04 08:02:00,1982.0,21.5,-45.51,4.32,132.0,2.0
2018-07-04 08:22:00,1991.3,26.2,-45.03,4.26,132.0,2.0
2018-07-04 08:41:00,1993.2,11.3,-45.18,4.04,308.0,2.0
2018-07-04 09:01:00,2001.6,31.4,-45.38,4.15,88.0,1.4
2018-07-04 09:22:00,1997.3,25.6,-45.3,4.1,nan,1.4
2018-07-04 09:41:00,2028.3,72.7,-45.4,4.29,286.0,1.0
2018-07-04 10:01:00,2008.7,39.6,-45.23,4.46,308.0,1.7
2018-07-04 10:21:00,1980.7,3.1,-45.83,4.22,88.0,1.0
2018-07-04 10:42:00,2002.3,20.6,-45.77,4.02,132.0,0.7
2018-07-04 11:01:00,2003.6,23.6,-45.62,4.19,88.0,1.0
2018-07-04 11:21:00,2068.4,72.6,-45.86,3.86,308.0,3.1
2018-07-04 11:42:00,2063.1,43.1,-46.2,4.11,176.0,2.0
2018-07-04 12:02:00,2014.2,18.1,-46.24,4.24,0.0,2.7
2018-07-04 12:22:00,1991.1,12.4,-46.08,4.01,88.0,1.0
2018-07-04 12:41:00,1991.4,34.9,-46.32,4.02,88.0,1.7
2018-07-04 13:02:00,1985.3,23.4,-46.21,4.32,264.0,1.4
2018-07-04 13:21:00,1992.6,22.1,-45.62,3.88,308.0,1.4
2018-07-04 13:37:00,1991.3,19.4,-45.73,4.2,88.0,1.7
2018-07-04 15:31:00,1996.7,17.0,-45.26,4.26,132.0,1.4
2018-07-04 15:52:00,2010.3,42.6,-46.17,4.32,176.0,0.7
2018-07-04 16:12:00,2025.7,40.1,-45.77,4.28,132.0,2.4
2018-07-04 16:32:00,2055.2,51.9,-45.81,4.3,88.0,2.0
2018-07-04 16:51:00,2015.7,37.1,-45.92,3.82,88.0,0.7
2018-07-04 17:11:00,2012.2,17.0,-46.35,4.03,132.0,1.7
2018-07-04 17:32:00,2021.0,25.6,-46.37,3.75,330.0,1.7
2018-07-04 17:52:00,2099.4,89.9,-45.57,3.9,132.0,1.7
2018-07-04 18:11:00,2094.3,109.7,-45.55,3.7,132.0,2.4
2018-07-04 18:31:00,2068.3,75.3,-46.01,4.25,220.0,2.7
2018-07-04 18:52:00,2066.4,33.9,-45.72,4.3,176.0,0.7
2018-07-04 19:12:00,2011.7,35.5,-45.73,4.22,308.0,3.1
2018-07-04 19:31:00,1970.7,19.7,-45.57,4.23,220.0,2.7
2018-07-04 19:51:00,1970.4,4.6,-45.53,4.22,88.0,2.4
2018-07-04 20:12:00,1988.3,10.0,-45.41,4.11,0.0,1.7
2018-07-04 20:32:00,2001.9,22.9,-45.5,4.36,132.0,1.4
2018-07-04 20:51:00,2072.8,30.7,-45.35,3.89,88.0,1.0
2018-07-04 21:11:00,2031.1,12.4,-46.11,4.26,132.0,1.7
2018-07-04 21:32:00,2020.9,5.6,-46.35,4.06,88.0,1.0
2018-07-04 21:52:00,2158.0,141.7,-45.45,4.3,176.0,1.4
2018-07-04 22:11:00,2086.6,13.5,-45.38,4.05,220.0,0.7
2018-07-04 22:31:00,2050.3,12.8,-46.1,4.1,176.0,1.4
2018-07-04 22:52:00,2033.3,5.9,-46.1,3.94,132.0,1.0
2018-07-04 23:12:00,2027.8,6.0,-46.35,4.21,176.0,1.0
2018-07-04 23:31:00,2025.5,6.5,-46.12,4.13,220.0,1.0
2018-07-04 23:51:00,2029.3,3.8,-46.46,4.38,176.0,1.0
2018-07-05 00:11:00,2044.5,9.5,-46.3,4.42,176.0,0.7
2018-07-05 00:31:00,2049.3,5.0,-46.34,4.06,132.0,0.3
2018-07-05 00:51:00,2052.1,7.2,-46.21,4.24,220.0,1.0
2018-07-05 01:11:00,2052.9,8.3,-46.08,4.3,264.0,0.7
2018-07-05 01:32:00,2045.5,5.5,-46.02,4.2,264.0,1.4
2018-07-05 01:52:00,2061.6,5.1,-45.99,4.33,0.0,1.4
2018-07-05 02:07:00,2058.9,4.1,-46.48,4.44,220.0,1.4
2018-07-05 04:02:00,2067.4,4.5,-46.15,4.22,264.0,1.0
2018-07-05 04:22:00,2077.8,4.5,-46.04,3.84,264.0,0.3
2018-07-05 04:42:00,2081.4,6.5,-46.34,4.04,308.0,1.4
2018-07-05 05:03:00,2082.6,6.4,-46.4,4.15,264.0,1.7
2018-07-05 05:23:00,2102.2,7.5,-46.29,3.86,264.0,1.4
2018-07-05 05:43:00,2133.5,16.6,-46.41,3.97,0.0,0.7
2018-07-05 06:03:00,2178.9,9.1,-46.51,3.6,264.0,1.7
2018-07-05 06:23:00,2198.5,4.9,-46.4,3.95,286.0,2.0
2018-07-05 06:43:00,2202.7,6.1,-46.23,3.78,220.0,1.0
2018-07-05 07:03:00,2199.9,4.5,-46.32,3.9,264.0,1.4
2018-07-05 07:23:00,2193.6,9.2,-46.42,4.01,264.0,0.7
2018-07-05 07:42:00,2181.0,6.1,-46.21,3.88,264.0,1.4
2018-07-05 08:02:00,2184.7,5.8,-46.11,3.71,220.0,0.3
2018-07-05 08:23:00,2178.7,9.2,-46.35,4.17,264.0,1.4
2018-07-05 08:42:00,2161.5,11.0,-46.01,4.15,308.0,0.7
2018-07-05 09:02:00,2148.5,5.7,-46.51,4.16,264.0,0.7
2018-07-05 09:23:00,2164.7,8.2,-46.05,3.98,264.0,1.0
2018-07-05 09:43:00,2148.2,4.8,-46.04,4.33,220.0,1.7
2018-07-05 10:02:00,2136.2,5.8,-46.2,4.4,132.0,0.7
2018-07-05 10:22:00,2146.5,8.4,-46.16,3.97,220.0,1.0
2018-07-05 10:43:00,2141.8,13.1,-46.3,3.96,220.0,1.0
2018-07-05 11:03:00,2120.5,23.9,-46.64,4.05,0.0,0.3
2018-07-05 11:22:00,2101.5,15.3,-45.82,4.09,264.0,1.4
2018-07-05 11:43:00,2067.8,22.0,-46.43,3.7,0.0,1.4
2018-07-05 12:03:00,2027.3,19.8,-46.16,4.27,nan,3.1
2018-07-05 12:22:00,2043.2,14.4,-46.22,3.92,176.0,2.0
2018-07-05 12:42:00,2041.1,8.0,-46.0,4.35,308.0,0.7
2018-07-05 13:02:00,2046.6,7.6,-46.11,4.35,0.0,1.0
2018-07-05 13:23:00,2063.5,6.9,-46.51,3.89,nan,1.4
2018-07-05 13:38:00,2071.3,9.9,-46.08,3.77,308.0,1.4
2018-07-05 15:32:00,1977.1,3.3,-46.4,4.37,nan,2.0
2018-07-05 15:52:00,1973.5,2.9,-45.96,4.22,308.0,0.3
2018-07-05 16:12:00,1994.8,8.5,-46.3,4.12,0.0,1.0
2018-07-05 16:32:00,1994.1,9.6,-46.26,4.04,0.0,1.4
2018-07-05 16:53:00,1988.4,11.1,-46.34,4.09,264.0,1.4
2018-07-05 17:12:00,1979.9,7.5,-47.1,4.17,264.0,1.4
2018-07-05 17:32:00,1984.4,9.3,-46.68,4.49,264.0,2.0
2018-07-05 17:53:00,2047.6,49.3,-46.74,4.11,132.0,1.7
2018-07-05 18:13:00,2073.0,7.0,-47.02,4.1,132.0,4.4
2018-07-05 18:32:00,2062.1,3.7,-46.52,4.03,176.0,2.4
2018-07-05 18:52:00,2063.0,8.0,-46.85,4.38,88.0,1.4
2018-07-05 19:13:00,2070.9,4.6,-46.88,3.74,198.0,3.1
2018-07-05 19:32:00,2066.6,8.2,-46.92,3.85,176.0,1.7
2018-07-05 19:52:00,2069.7,5.4,-47.14,4.01,176.0,0.7
2018-07-05 20:12:00,2089.0,12.5,-47.03,4.11,176.0,0.3
2018-07-05 20:32:00,2094.6,14.3,-47.26,4.36,132.0,1.7
2018-07-05 20:53:00,2124.0,15.2,-47.0,3.75,154.0,1.0
2018-07-05 21:12:00,2130.5,7.6,-47.23,3.91,220.0,0.7
2018-07-05 21:32:00,2149.1,12.4,-46.99,3.8,176.0,1.4
2018-07-05 21:52:00,2132.7,10.6,-47.15,4.06,132.0,0.3
2018-07-05 22:12:00,2125.8,8.0,-47.29,4.09,220.0,0.3
2018-07-05 22:33:00,2116.8,8.5,-46.66,4.17,220.0,1.0
2018-07-05 22:53:00,2117.6,8.1,-47.03,3.87,220.0,1.0
2018-07-05 23:13:00,2123.2,9.5,-47.05,4.13,220.0,1.4
2018-07-05 23:33:00,2158.1,18.9,-46.71,3.93,176.0,1.4
2018-07-05 23:52:00,2157.8,8.6,-47.09,4.16,264.0,1.0
2018-07-06 00:12:00,2172.1,9.8,-47.1,3.96,132.0,0.7
2018-07-06 00:32:00,2176.9,15.1,-46.84,3.86,264.0,0.7
2018-07-06 00:53:00,2204.1,8.7,-47.36,3.71,154.0,0.0
2018-07-06 01:12:00,2224.0,6.0,-46.84,3.78,198.0,1.0
2018-07-06 01:32:00,2240.5,30.4,-46.81,3.78,88.0,0.7
2018-07-06 01:53:00,2310.4,19.1,-47.53,3.65,286.0,0.3
2018-07-06 02:08:00,2288.4,14.4,-46.75,3.64,308.0,1.0
2018-07-06 04:02:00,2137.3,12.2,-46.83,3.97,220.0,0.0
2018-07-06 04:23:00,2158.3,8.0,-46.86,4.08,308.0,0.3
2018-07-06 04:42:00,2128.7,9.9,-47.53,4.22,308.0,0.7
2018-07-06 05:03:00,2107.6,10.4,-46.68,4.03,286.0,0.7
2018-07-06 05:22:00,2097.2,16.6,-46.63,4.22,308.0,1.4
2018-07-06 05:42:00,2078.0,6.1,-47.09,4.22,308.0,1.0
2018-07-06 06:03:00,2071.8,7.2,-46.8,4.15,308.0,2.0
2018-07-06 06:22:00,2081.0,7.8,-46.24,4.33,0.0,1.7
2018-07-06 06:42:00,2103.5,5.1,-46.55,3.92,264.0,1.7
2018-07-06 07:02:00,2100.0,5.0,-46.22,4.15,308.0,1.4
2018-07-06 07:22:00,2095.4,6.1,-46.18,3.83,308.0,1.7
2018-07-06 07:43:00,2082.8,15.1,-46.12,4.05,nan,0.7
2018-07-06 08:02:00,2055.2,9.3,-46.74,4.23,264.0,1.0
2018-07-06 08:22:00,2052.1,2.8,-46.88,4.25,308.0,2.0
2018-07-06 08:43:00,2043.6,4.9,-46.59,4.19,264.0,2.7
2018-07-06 09:02:00,2036.2,13.8,-46.5,3.98,308.0,2.7
2018-07-06 09:22:00,2052.2,19.6,-46.32,4.15,220.0,2.0
2018-07-06 09:43:00,2023.3,10.3,-46.89,3.83,nan,2.0
2018-07-06 10:03:00,2012.7,5.5,-46.48,4.12,308.0,1.7
2018-07-06 10:22:00,2011.7,2.9,-46.3,4.1,286.0,2.4
2018-07-06 10:42:00,2011.6,2.3,-46.26,4.3,0.0,1.0
2018-07-06 11:02:00,2007.5,9.8,-46.36,4.17,0.0,1.0
2018-07-06 11:22:00,2000.1,5.5,-46.39,4.17,176.0,1.4
2018-07-06 11:42:00,1998.9,9.6,-46.74,4.35,0.0,1.7
2018-07-06 12:03:00,1997.2,10.6,-46.74,4.58,0.0,1.7
2018-07-06 12:23:00,1985.7,8.0,-47.02,4.1,308.0,2.7
2018-07-06 12:43:00,1982.9,5.6,-46.6,4.37,308.0,2.7
2018-07-06 13:03:00,1987.5,7.5,-46.85,4.1,264.0,2.4
2018-07-06 13:23:00,1988.8,8.3,-46.58,4.11,286.0,2.0
2018-07-06 13:38:00,1981.4,5.9,-46.68,4.67,308.0,1.7
2018-07-06 15:33:00,1978.0,10.2,-45.97,4.43,0.0,3.4
2018-07-06 15:53:00,1967.0,7.4,-46.18,4.4,220.0,2.0
2018-07-06 16:13:00,1967.9,7.4,-46.6,4.42,176.0,2.0
2018-07-06 16:34:00,1964.4,4.7,-46.49,4.22,308.0,2.4
2018-07-06 16:54:00,1967.7,8.3,-46.69,3.92,132.0,1.0
2018-07-06 17:13:00,1963.5,4.6,-46.87,4.49,0.0,1.7
2018-07-06 17:33:00,1962.4,3.2,-46.54,4.4,264.0,1.7
2018-07-06 17:54:00,1960.0,3.0,-46.79,4.52,132.0,2.0
2018-07-06 18:13:00,1965.6,3.8,-47.0,4.49,308.0,1.4
2018-07-06 18:33:00,1966.8,4.9,-46.89,4.36,0.0,1.0
2018-07-06 18:53:00,1966.7,3.5,-46.62,4.17,330.0,1.7
2018-07-06 19:14:00,1967.2,4.0,-47.08,4.24,132.0,1.0
2018-07-06 19:33:00,1967.9,4.2,-46.97,4.41,88.0,1.4
2018-07-06 19:53:00,1972.4,4.0,-47.04,4.83,0.0,1.0
2018-07-06 20:13:00,1984.9,2.7,-47.19,4.67,88.0,1.7
2018-07-06 20:34:00,1988.1,2.5,-47.3,4.27,132.0,1.7
2018-07-06 20:54:00,1997.7,4.8,-47.19,4.16,0.0,1.4
2018-07-06 21:14:00,2037.9,22.7,-47.05,4.58,132.0,3.7
2018-07-06 21:34:00,2067.8,13.3,-46.93,4.19,88.0,4.4
2018-07-06 21:53:00,2070.2,23.5,-46.72,4.47,88.0,3.7
2018-07-06 22:13:00,2054.8,12.5,-46.86,4.35,132.0,2.0
2018-07-06 22:33:00,2037.3,12.9,-46.76,4.37,154.0,4.1
2018-07-06 22:53:00,2033.7,4.1,-47.14,4.28,88.0,2.0
2018-07-06 23:14:00,2062.3,21.3,-47.27,4.07,88.0,1.4
2018-07-06 23:34:00,2054.9,5.5,-47.4,4.26,132.0,0.7
2018-07-06 23:53:00,2074.7,16.3,-47.31,3.82,110.0,1.4
2018-07-07 00:13:00,2123.6,5.5,-47.69,3.83,88.0,1.0
2018-07-07 00:33:00,2125.3,2.7,-47.32,3.99,44.0,2.0
2018-07-07 00:54:00,2134.0,8.8,-47.69,4.25,44.0,1.4
2018-07-07 01:14:00,2142.1,5.4,-47.13,3.88,44.0,1.7
2018-07-07 01:33:00,2154.2,4.2,-46.86,3.91,88.0,0.7
2018-07-07 01:53:00,2170.7,6.9,-47.28,3.96,132.0,1.4
2018-07-07 02:09:00,2152.4,5.3,-46.76,4.35,132.0,1.4
2018-07-07 04:03:00,2223.1,71.6,-47.14,3.74,132.0,0.0
2018-07-07 04:24:00,2223.9,18.0,-47.41,3.89,176.0,0.3
2018-07-07 04:44:00,2253.8,105.3,-47.15,3.92,220.0,0.3
2018-07-07 05:04:00,2216.4,12.8,-47.34,3.64,132.0,0.3
2018-07-07 05:23:00,2210.4,10.3,-47.06,3.91,308.0,0.7
2018-07-07 05:43:00,2231.9,14.3,-47.4,3.77,308.0,0.7
2018-07-07 06:03:00,2264.3,8.8,-47.56,3.75,264.0,1.4
2018-07-07 06:23:00,2257.4,11.8,-47.27,3.52,264.0,0.7
2018-07-07 06:43:00,2236.6,6.5,-47.13,3.97,220.0,0.7
2018-07-07 07:04:00,2233.3,10.3,-47.23,3.94,308.0,1.4
2018-07-07 07:24:00,2244.9,5.9,-47.09,4.0,308.0,1.4
2018-07-07 07:44:00,2239.8,8.3,-46.98,3.84,308.0,1.4
2018-07-07 08:04:00,2280.0,32.0,-46.7,3.86,308.0,0.0
2018-07-07 08:23:00,2292.2,21.5,-47.01,3.75,264.0,1.0
2018-07-07 08:43:00,2294.5,7.8,-46.73,3.49,264.0,1.0
2018-07-07 09:03:00,2267.0,16.9,-46.33,4.01,286.0,2.0
2018-07-07 09:24:00,2207.0,26.2,-46.43,3.8,286.0,0.3
2018-07-07 09:43:00,2101.3,17.4,-46.65,4.0,176.0,1.4
2018-07-07 10:03:00,2063.9,10.4,-46.9,4.51,330.0,1.4
2018-07-07 10:23:00,2054.7,11.2,-46.5,4.26,264.0,3.1
2018-07-07 10:43:00,2067.5,5.9,-46.57,4.02,220.0,2.0
2018-07-07 11:03:00,2023.6,20.1,-46.85,4.32,0.0,3.1
2018-07-07 11:23:00,2015.0,5.7,-46.84,4.1,308.0,2.7
2018-07-07 11:43:00,2009.1,6.4,-46.52,4.26,264.0,2.4
2018-07-07 12:03:00,2012.5,7.3,-46.33,4.29,308.0,3.1
2018-07-07 12:23:00,2005.4,6.2,-47.0,4.24,220.0,3.1
2018-07-07 12:43:00,1998.9,7.7,-46.61,4.38,220.0,2.7
2018-07-07 13:03:00,1991.7,8.3,-46.83,4.19,264.0,4.8
2018-07-07 13:24:00,1993.6,7.7,-46.99,4.18,308.0,3.7
2018-07-07 13:39:00,1992.1,8.4,-46.91,3.98,264.0,2.0
2018-07-07 15:34:00,1956.5,13.7,-46.4,4.27,220.0,2.4
2018-07-07 15:54:00,1950.8,5.4,-46.52,4.3,286.0,2.7
2018-07-07 16:15:00,1945.2,5.4,-46.67,4.42,308.0,1.7
2018-07-07 16:35:00,1947.9,8.5,-47.11,4.52,264.0,3.4
2018-07-07 16:54:00,1944.6,5.8,-47.23,4.42,264.0,2.0
2018-07-07 17:14:00,1949.1,9.4,-47.08,4.29,286.0,2.0
2018-07-07 17:35:00,1955.4,8.8,-47.44,4.34,308.0,2.0
2018-07-07 17:55:00,1962.9,8.0,-47.21,4.16,330.0,3.1
2018-07-07 18:14:00,1963.5,5.7,-47.7,4.46,220.0,3.4
2018-07-07 18:34:00,1962.7,2.8,-47.25,4.14,308.0,2.4
2018-07-07 18:54:00,1958.8,2.0,-47.5,4.26,264.0,2.7
2018-07-07 19:15:00,1964.6,3.3,-47.19,4.51,308.0,3.1
2018-07-07 19:35:00,1969.5,3.8,-47.33,4.28,0.0,2.7
2018-07-07 19:55:00,1973.3,2.7,-47.19,4.18,264.0,2.7
2018-07-07 20:15:00,1970.6,2.6,-47.73,4.61,0.0,2.0
2018-07-07 20:34:00,1983.2,3.7,-47.92,4.45,0.0,2.4
2018-07-07 20:55:00,1994.3,6.3,-47.02,4.13,220.0,1.7
2018-07-07 21:15:00,2013.0,6.6,-47.07,4.52,286.0,1.4
2018-07-07 21:34:00,2007.5,7.7,-47.48,4.22,308.0,1.4
2018-07-07 21:54:00,1995.5,4.5,-47.76,4.52,0.0,2.4
2018-07-07 22:15:00,2026.4,19.0,-46.84,4.28,88.0,1.7
2018-07-07 22:35:00,2088.0,32.2,-47.01,4.2,44.0,3.7
2018-07-07 22:54:00,2125.2,116.9,-47.15,4.05,0.0,2.7
2018-07-07 23:15:00,2073.8,19.4,-46.94,4.39,88.0,2.4
2018-07-07 23:35:00,2068.0,11.3,-47.65,4.29,88.0,3.1
2018-07-07 23:54:00,2061.5,11.4,-47.15,4.46,88.0,1.0
2018-07-08 00:15:00,2070.1,3.9,-47.65,4.28,132.0,1.7
2018-07-08 00:35:00,2078.3,3.3,-47.46,4.55,88.0,1.0
2018-07-08 00:54:00,2098.7,10.6,-48.01,3.87,88.0,1.0
2018-07-08 01:15:00,2105.9,9.0,-46.85,3.98,44.0,0.7
2018-07-08 01:35:00,2122.9,16.2,-47.02,4.13,44.0,1.0
2018-07-08 01:54:00,2128.1,7.4,-47.34,3.96,308.0,1.4
2018-07-08 02:10:00,2134.6,10.2,-47.29,3.91,264.0,1.0
2018-07-08 04:04:00,2148.0,8.3,-46.82,4.01,44.0,1.7
2018-07-08 04:24:00,2169.9,9.4,-47.56,4.12,308.0,0.7
2018-07-08 04:45:00,2164.2,9.8,-46.87,4.16,0.0,0.7
2018-07-08 05:05:00,2160.3,9.1,-47.73,4.13,132.0,0.7
2018-07-08 05:25:00,2127.9,5.9,-47.06,4.07,0.0,1.4
2018-07-08 05:45:00,2112.6,6.9,-47.2,3.78,308.0,0.7
2018-07-08 06:05:00,2091.1,6.1,-47.16,4.16,308.0,1.7
2018-07-08 06:24:00,2078.5,7.9,-47.1,4.35,88.0,1.0
2018-07-08 06:45:00,2088.1,26.2,-46.66,3.8,308.0,2.0
2018-07-08 07:05:00,2077.1,15.8,-46.91,4.25,220.0,0.7
2018-07-08 07:24:00,2051.5,4.2,-46.78,4.04,220.0,0.7
2018-07-08 07:44:00,2058.5,2.9,-46.9,4.0,0.0,1.0
2018-07-08 08:05:00,2082.5,32.4,-46.61,4.17,88.0,0.7
2018-07-08 08:25:00,2045.5,5.6,-46.74,4.31,308.0,1.7
2018-07-08 08:44:00,2065.9,30.4,-46.68,4.35,nan,1.7
2018-07-08 09:04:00,2059.9,34.2,-46.77,4.22,176.0,2.7
2018-07-08 09:24:00,2036.4,40.5,-46.61,4.06,264.0,2.0
2018-07-08 09:44:00,2085.1,52.8,-46.71,3.98,nan,2.0
2018-07-08 10:04:00,2034.8,45.2,-47.26,4.21,308.0,2.0
2018-07-08 10:25:00,2042.0,47.9,-46.59,3.99,132.0,1.7
2018-07-08 10:45:00,2025.2,26.6,-46.88,4.12,132.0,1.0
2018-07-08 11:04:00,2008.6,24.9,-47.29,4.28,264.0,2.0
2018-07-08 11:24:00,1982.6,13.0,-46.85,4.17,264.0,3.7
2018-07-08 11:44:00,1982.7,8.2,-46.79,4.56,0.0,0.7
2018-07-08 12:05:00,1977.3,6.3,-47.4,4.55,220.0,2.7
2018-07-08 12:24:00,1987.8,26.8,-46.92,4.5,nan,2.4
2018-07-08 12:45:00,1978.1,12.9,-47.05,4.37,308.0,1.0
2018-07-08 13:04:00,1969.4,9.7,-47.04,4.25,132.0,1.7
2018-07-08 13:24:00,1983.5,22.4,-47.28,4.34,88.0,2.4
2018-07-08 13:40:00,1965.4,3.6,-47.18,4.62,0.0,2.0
2018-07-08 15:36:00,1931.9,3.8,-47.1,4.39,286.0,2.4
2018-07-08 15:56:00,1929.0,3.1,-47.37,4.59,286.0,2.4
2018-07-08 16:16:00,1925.6,4.6,-46.71,4.7,132.0,1.7
2018-07-08 16:35:00,1928.4,4.0,-47.24,4.41,110.0,3.1
2018-07-08 16:55:00,1935.0,3.7,-47.4,4.57,308.0,3.4
[truncated: 2,296,219 more chars]
