# Supplementary material for: Continuous CH 4 and δ 13 CH 4 measurements in London demonstrate under-reported natural gas leakage
Source: Copernicus journal article supplement (doi:10.5194/acp-2021-606), 2021-09-28
Supplement: Supplementary file 1 [file acp-2021-606-supplement.zip › ICL_simulations.txt]

# ****************************************************************************************************************
# Number of header lines: 36
#
# Date created:  11 Feb. 2021
# Contact names: Eric Saboya    (ess17@ic.ac.uk),
#                Heather Graven (h.graven@imperial.ac.uk),
#                Giulia Zazzeri (g.zazzeri@imperial.ac.uk)
#
# ****************************************************************************************************************
# Data description:
# Site: Huxley Building, Imperial College London, South Kensington
# Data range:  1 Jan. 2018 - Oct. 2020
#
# Description:
#     Hourly simulations of excess methane (CH4) mole fractions and 13C/12C  (d13ch4) at Imperial College
#     London.
#
#   Simulated values are calculated by combining NAME footprints with emissions
#   inventories of CH4 as per Manning et al. (2011).
#
#   Full details of simulations available in Saboya et al. (2021)
#
#   Please reference Saboya et al., 2021 when using data.
#
# ****************************************************************************************************************
# Column headings
# 0:  Time stamp: (Year-Month-Day Hour:Minute:Second)
# 1:  EDGAR30km Excess mole fractions (ppb)
# 2:  EDGAR30km d13ch4 (‰)
# 3:  EDGAR10km Excess mole fractions (ppb)
# 4:  EDGAR10km d13ch4 (‰)
# 5:  NAEI30km  Excess mole fractions (ppb)
# 6:  NAEI30km  d13ch4 (‰)
# 7:  NAEI2km   Excess mole fractions (ppb)
# 8:  NAEI2km   d13ch4 (‰)
# ****************************************************************************************************************
2018-01-01 00:00:00,53.9,-47.87,47.9,-47.84,43.7,-47.75,43.1,-47.84
2018-01-01 01:00:00,57.4,-47.89,46.8,-47.84,49.1,-47.77,35.4,-47.83
2018-01-01 02:00:00,54.5,-47.88,39.6,-47.8,46.0,-47.76,31.3,-47.79
2018-01-01 03:00:00,48.8,-47.84,31.5,-47.75,38.5,-47.71,27.6,-47.74
2018-01-01 04:00:00,46.0,-47.82,27.5,-47.73,34.7,-47.7,25.9,-47.72
2018-01-01 05:00:00,64.3,-47.89,35.4,-47.75,43.6,-47.7,34.9,-47.72
2018-01-01 06:00:00,75.9,-47.94,42.8,-47.77,40.8,-47.68,34.1,-47.7
2018-01-01 07:00:00,92.4,-48.01,51.2,-47.78,43.7,-47.67,34.9,-47.66
2018-01-01 08:00:00,139.4,-48.18,64.7,-47.79,58.8,-47.68,45.5,-47.58
2018-01-01 09:00:00,250.6,-48.58,111.9,-47.93,95.9,-47.76,72.3,-47.5
2018-01-01 10:00:00,314.0,-48.79,127.6,-47.94,116.5,-47.82,93.4,-47.45
2018-01-01 11:00:00,181.5,-48.32,106.4,-47.91,82.2,-47.64,62.0,-47.55
2018-01-01 12:00:00,75.9,-47.92,61.0,-47.82,50.4,-47.66,39.4,-47.66
2018-01-01 13:00:00,55.0,-47.84,46.6,-47.78,39.3,-47.68,42.5,-47.71
2018-01-01 14:00:00,50.3,-47.84,41.2,-47.79,35.2,-47.71,47.8,-47.79
2018-01-01 15:00:00,65.4,-47.92,53.2,-47.86,41.4,-47.74,48.4,-47.83
2018-01-01 16:00:00,86.9,-48.0,76.9,-47.95,53.9,-47.75,73.8,-47.88
2018-01-01 17:00:00,86.4,-48.01,97.1,-48.07,58.9,-47.77,93.0,-47.98
2018-01-01 18:00:00,81.0,-47.99,88.6,-48.04,58.4,-47.79,75.5,-47.94
2018-01-01 19:00:00,69.9,-47.94,69.8,-47.95,51.2,-47.78,65.2,-47.91
2018-01-01 20:00:00,60.6,-47.91,57.1,-47.89,41.1,-47.75,54.8,-47.88
2018-01-01 21:00:00,55.3,-47.88,42.7,-47.82,33.9,-47.72,37.1,-47.8
2018-01-01 22:00:00,58.6,-47.89,38.9,-47.79,34.0,-47.71,34.2,-47.77
2018-01-01 23:00:00,69.5,-47.94,51.6,-47.85,42.0,-47.72,47.4,-47.82
2018-01-02 00:00:00,80.9,-47.99,75.6,-47.95,55.0,-47.77,70.1,-47.9
2018-01-02 01:00:00,82.8,-47.99,76.3,-47.96,61.3,-47.8,70.6,-47.9
2018-01-02 02:00:00,92.0,-48.02,84.2,-47.98,65.9,-47.8,75.9,-47.9
2018-01-02 03:00:00,113.0,-48.09,103.9,-48.03,77.7,-47.79,92.4,-47.89
2018-01-02 04:00:00,135.2,-48.16,123.2,-48.07,90.3,-47.79,119.3,-47.92
2018-01-02 05:00:00,157.0,-48.22,134.4,-48.07,104.0,-47.76,123.2,-47.89
2018-01-02 06:00:00,158.9,-48.23,119.4,-48.0,117.0,-47.79,87.1,-47.74
2018-01-02 07:00:00,201.8,-48.4,109.9,-47.94,129.5,-47.82,99.0,-47.76
2018-01-02 08:00:00,308.4,-48.79,128.1,-47.96,143.2,-47.88,116.5,-47.7
2018-01-02 09:00:00,373.7,-49.0,168.0,-48.11,152.2,-47.89,125.2,-47.63
2018-01-02 10:00:00,190.6,-48.39,140.2,-48.11,82.5,-47.8,77.2,-47.68
2018-01-02 11:00:00,173.6,-48.33,105.5,-47.99,74.2,-47.81,63.2,-47.66
2018-01-02 12:00:00,113.3,-48.13,54.9,-47.84,55.1,-47.78,40.1,-47.76
2018-01-02 13:00:00,94.8,-48.1,56.4,-47.91,53.0,-47.84,42.3,-47.9
2018-01-02 14:00:00,84.4,-48.03,52.1,-47.87,48.1,-47.78,36.8,-47.82
2018-01-02 15:00:00,84.0,-47.97,47.0,-47.77,53.7,-47.7,36.1,-47.68
2018-01-02 16:00:00,76.3,-47.94,54.1,-47.82,63.3,-47.75,35.7,-47.7
2018-01-02 17:00:00,81.2,-47.96,54.9,-47.82,67.9,-47.77,39.4,-47.73
2018-01-02 18:00:00,99.7,-48.04,50.2,-47.79,69.7,-47.77,48.1,-47.75
2018-01-02 19:00:00,96.6,-48.04,56.4,-47.85,53.2,-47.75,42.4,-47.76
2018-01-02 20:00:00,53.0,-47.85,31.2,-47.74,30.0,-47.68,20.4,-47.7
2018-01-02 21:00:00,42.3,-47.8,21.7,-47.69,22.6,-47.65,14.6,-47.65
2018-01-02 22:00:00,40.0,-47.78,15.5,-47.66,21.7,-47.65,11.9,-47.64
2018-01-02 23:00:00,42.5,-47.79,20.9,-47.69,26.7,-47.66,15.0,-47.65
2018-01-03 00:00:00,39.9,-47.79,26.8,-47.73,32.6,-47.71,26.2,-47.74
2018-01-03 01:00:00,35.1,-47.77,25.3,-47.72,26.7,-47.69,31.7,-47.77
2018-01-03 02:00:00,35.6,-47.78,27.2,-47.73,27.7,-47.7,28.1,-47.78
2018-01-03 03:00:00,32.3,-47.77,23.6,-47.72,25.3,-47.7,29.6,-47.8
2018-01-03 04:00:00,26.3,-47.74,21.7,-47.71,20.6,-47.68,21.1,-47.74
2018-01-03 05:00:00,28.5,-47.75,23.7,-47.72,22.4,-47.69,19.8,-47.73
2018-01-03 06:00:00,34.3,-47.77,29.3,-47.74,26.6,-47.7,23.4,-47.74
2018-01-03 07:00:00,30.2,-47.76,25.6,-47.73,23.8,-47.69,21.6,-47.73
2018-01-03 08:00:00,28.4,-47.75,23.8,-47.72,21.6,-47.69,23.9,-47.74
2018-01-03 09:00:00,30.9,-47.76,26.8,-47.74,23.9,-47.69,25.7,-47.74
2018-01-03 10:00:00,26.8,-47.74,24.2,-47.73,20.9,-47.69,23.1,-47.74
2018-01-03 11:00:00,26.0,-47.74,23.6,-47.73,20.4,-47.69,25.8,-47.75
2018-01-03 12:00:00,24.8,-47.73,22.8,-47.72,19.9,-47.68,23.6,-47.74
2018-01-03 13:00:00,23.8,-47.73,21.5,-47.71,18.7,-47.68,23.5,-47.74
2018-01-03 14:00:00,25.8,-47.73,22.3,-47.71,19.9,-47.68,21.6,-47.72
2018-01-03 15:00:00,30.3,-47.75,26.9,-47.73,24.0,-47.68,21.6,-47.72
2018-01-03 16:00:00,35.2,-47.77,28.9,-47.73,27.1,-47.68,30.6,-47.75
2018-01-03 17:00:00,38.5,-47.79,29.9,-47.74,29.8,-47.69,33.9,-47.78
2018-01-03 18:00:00,38.2,-47.79,27.7,-47.73,30.4,-47.7,24.6,-47.75
2018-01-03 19:00:00,42.3,-47.81,30.5,-47.74,32.0,-47.7,34.8,-47.79
2018-01-03 20:00:00,49.5,-47.84,36.9,-47.76,37.2,-47.71,41.6,-47.81
2018-01-03 21:00:00,62.0,-47.89,43.7,-47.79,50.4,-47.74,30.3,-47.75
2018-01-03 22:00:00,72.5,-47.94,47.7,-47.8,58.7,-47.76,36.2,-47.77
2018-01-03 23:00:00,83.7,-47.98,52.6,-47.81,67.1,-47.77,41.0,-47.76
2018-01-04 00:00:00,89.1,-47.99,49.2,-47.79,67.9,-47.75,45.5,-47.76
2018-01-04 01:00:00,90.5,-48.0,48.2,-47.78,64.6,-47.73,46.8,-47.75
2018-01-04 02:00:00,98.0,-48.02,50.6,-47.77,67.8,-47.72,52.1,-47.73
2018-01-04 03:00:00,103.8,-48.03,55.8,-47.79,72.6,-47.73,55.7,-47.72
2018-01-04 04:00:00,127.6,-48.13,68.0,-47.83,76.4,-47.74,61.4,-47.7
2018-01-04 05:00:00,143.6,-48.2,76.3,-47.85,74.0,-47.73,63.8,-47.68
2018-01-04 06:00:00,199.9,-48.42,147.1,-48.15,80.2,-47.78,66.3,-47.65
2018-01-04 07:00:00,249.4,-48.59,249.8,-48.57,100.3,-47.85,75.2,-47.68
2018-01-04 08:00:00,201.8,-48.41,100.4,-47.92,88.0,-47.78,69.9,-47.6
2018-01-04 09:00:00,249.8,-48.52,133.1,-47.93,125.6,-47.65,92.2,-47.49
2018-01-04 10:00:00,133.6,-48.13,76.6,-47.84,95.4,-47.75,59.7,-47.68
2018-01-04 11:00:00,68.3,-47.9,40.3,-47.76,54.8,-47.73,34.5,-47.7
2018-01-04 12:00:00,49.3,-47.83,32.0,-47.75,45.6,-47.74,30.0,-47.73
2018-01-04 13:00:00,37.4,-47.79,30.1,-47.76,38.9,-47.74,24.8,-47.75
2018-01-04 14:00:00,25.4,-47.73,20.4,-47.71,20.8,-47.67,21.9,-47.75
2018-01-04 15:00:00,28.4,-47.74,23.0,-47.72,22.6,-47.69,20.0,-47.73
2018-01-04 16:00:00,36.6,-47.8,31.1,-47.77,29.2,-47.73,30.0,-47.79
2018-01-04 17:00:00,42.5,-47.83,40.1,-47.82,32.6,-47.74,41.1,-47.83
2018-01-04 18:00:00,50.1,-47.84,46.0,-47.82,36.7,-47.72,43.8,-47.8
2018-01-04 19:00:00,62.3,-47.88,50.8,-47.81,48.0,-47.73,46.7,-47.79
2018-01-04 20:00:00,69.6,-47.91,47.5,-47.79,56.0,-47.73,32.1,-47.7
2018-01-04 21:00:00,77.5,-47.94,39.8,-47.75,52.0,-47.7,39.1,-47.72
2018-01-04 22:00:00,90.8,-48.0,48.8,-47.78,57.6,-47.71,48.2,-47.73
2018-01-04 23:00:00,87.1,-47.96,54.8,-47.78,55.8,-47.68,44.6,-47.63
2018-01-05 00:00:00,112.7,-48.03,78.6,-47.82,70.0,-47.63,49.5,-47.56
2018-01-05 01:00:00,108.3,-48.02,71.7,-47.82,78.7,-47.69,52.6,-47.62
2018-01-05 02:00:00,117.2,-48.07,76.7,-47.85,99.3,-47.78,66.9,-47.71
2018-01-05 03:00:00,121.7,-48.11,83.6,-47.92,101.9,-47.84,69.3,-47.79
2018-01-05 04:00:00,126.8,-48.14,67.7,-47.84,89.8,-47.8,68.9,-47.79
2018-01-05 05:00:00,138.0,-48.16,67.1,-47.8,81.8,-47.73,64.8,-47.69
2018-01-05 06:00:00,159.7,-48.25,77.2,-47.83,76.2,-47.69,63.3,-47.63
2018-01-05 07:00:00,150.6,-48.23,74.7,-47.84,67.2,-47.7,50.5,-47.64
2018-01-05 08:00:00,104.6,-48.05,58.4,-47.81,49.3,-47.68,35.2,-47.67
2018-01-05 09:00:00,78.6,-47.94,42.6,-47.75,38.8,-47.65,25.2,-47.67
2018-01-05 10:00:00,56.2,-47.86,31.2,-47.73,29.6,-47.66,19.2,-47.7
2018-01-05 11:00:00,42.1,-47.8,28.2,-47.73,26.6,-47.68,20.8,-47.73
2018-01-05 12:00:00,33.9,-47.77,26.4,-47.74,26.1,-47.7,21.8,-47.75
2018-01-05 13:00:00,32.6,-47.77,27.7,-47.76,28.3,-47.72,24.1,-47.77
2018-01-05 14:00:00,36.5,-47.8,32.2,-47.78,33.2,-47.74,28.4,-47.8
2018-01-05 15:00:00,46.1,-47.83,40.1,-47.81,38.9,-47.74,33.7,-47.8
2018-01-05 16:00:00,66.6,-47.9,57.3,-47.85,53.9,-47.75,42.0,-47.78
2018-01-05 17:00:00,91.8,-47.99,74.4,-47.89,76.9,-47.77,50.8,-47.76
2018-01-05 18:00:00,105.3,-48.03,82.1,-47.89,82.1,-47.75,56.3,-47.71
2018-01-05 19:00:00,122.6,-48.09,87.3,-47.88,88.0,-47.71,62.2,-47.66
2018-01-05 20:00:00,158.2,-48.22,95.7,-47.87,108.2,-47.73,76.0,-47.63
2018-01-05 21:00:00,213.7,-48.43,106.6,-47.88,119.8,-47.75,93.8,-47.61
2018-01-05 22:00:00,328.2,-48.83,136.0,-47.93,140.9,-47.79,113.7,-47.49
2018-01-05 23:00:00,335.6,-48.83,161.7,-47.99,147.4,-47.73,128.9,-47.43
2018-01-06 00:00:00,285.1,-48.64,177.5,-48.04,142.6,-47.64,137.0,-47.51
2018-01-06 01:00:00,333.9,-48.81,204.0,-48.13,151.0,-47.73,145.8,-47.47
2018-01-06 02:00:00,342.7,-48.85,236.4,-48.31,144.5,-47.82,150.2,-47.56
2018-01-06 03:00:00,371.8,-48.94,469.1,-49.2,141.7,-47.9,188.4,-47.67
2018-01-06 04:00:00,391.4,-49.01,477.2,-49.27,138.0,-47.93,198.6,-47.81
2018-01-06 05:00:00,454.3,-49.19,522.3,-49.42,143.4,-47.97,221.8,-47.91
2018-01-06 06:00:00,506.9,-49.35,599.2,-49.65,157.0,-48.02,231.6,-47.92
2018-01-06 07:00:00,437.3,-49.19,529.3,-49.49,144.4,-48.03,220.8,-47.99
2018-01-06 08:00:00,367.0,-48.98,393.9,-49.06,137.2,-48.04,199.9,-48.01
2018-01-06 09:00:00,315.4,-48.79,286.5,-48.67,127.0,-48.04,175.8,-48.03
2018-01-06 10:00:00,290.7,-48.7,247.7,-48.53,116.1,-48.03,163.1,-48.08
2018-01-06 11:00:00,261.6,-48.6,267.2,-48.63,104.6,-48.0,155.5,-48.1
2018-01-06 12:00:00,225.0,-48.48,258.5,-48.64,91.6,-47.97,145.8,-48.12
2018-01-06 13:00:00,197.0,-48.39,213.2,-48.5,81.8,-47.94,125.8,-48.08
2018-01-06 14:00:00,146.1,-48.21,154.0,-48.26,66.5,-47.87,92.3,-47.98
2018-01-06 15:00:00,135.2,-48.14,139.6,-48.17,69.5,-47.86,86.7,-47.96
2018-01-06 16:00:00,144.3,-48.13,133.6,-48.1,80.2,-47.87,86.6,-47.97
2018-01-06 17:00:00,145.0,-48.14,133.5,-48.09,83.4,-47.86,82.5,-47.97
2018-01-06 18:00:00,140.0,-48.14,133.2,-48.12,78.9,-47.84,77.5,-47.96
2018-01-06 19:00:00,129.9,-48.1,131.8,-48.1,72.2,-47.82,74.2,-47.94
2018-01-06 20:00:00,128.1,-48.09,123.5,-48.07,68.1,-47.8,67.9,-47.9
2018-01-06 21:00:00,111.7,-48.05,106.6,-48.03,52.3,-47.77,53.3,-47.81
2018-01-06 22:00:00,93.4,-47.98,94.1,-47.99,38.5,-47.72,44.4,-47.75
2018-01-06 23:00:00,100.9,-48.01,97.9,-48.0,38.3,-47.72,44.0,-47.73
2018-01-07 00:00:00,101.4,-48.0,94.7,-47.98,38.8,-47.72,44.7,-47.72
2018-01-07 01:00:00,102.2,-48.01,100.7,-48.01,40.5,-47.72,47.0,-47.75
2018-01-07 02:00:00,107.8,-48.03,106.1,-48.03,45.1,-47.74,50.0,-47.78
2018-01-07 03:00:00,112.3,-48.05,103.0,-48.01,51.1,-47.77,52.4,-47.83
2018-01-07 04:00:00,112.4,-48.04,96.7,-47.99,58.3,-47.8,55.5,-47.92
2018-01-07 05:00:00,119.6,-48.08,105.2,-48.02,65.2,-47.83,57.9,-47.95
2018-01-07 06:00:00,125.5,-48.11,115.1,-48.07,70.7,-47.85,60.0,-47.99
2018-01-07 07:00:00,133.4,-48.15,129.7,-48.15,79.8,-47.89,62.6,-48.05
2018-01-07 08:00:00,145.1,-48.21,141.3,-48.22,93.4,-47.95,69.7,-48.13
2018-01-07 09:00:00,138.5,-48.19,136.2,-48.21,91.6,-47.95,67.1,-48.12
2018-01-07 10:00:00,117.9,-48.1,123.6,-48.16,78.9,-47.9,55.5,-48.04
2018-01-07 11:00:00,95.2,-48.0,99.4,-48.06,66.8,-47.86,43.5,-47.99
2018-01-07 12:00:00,81.5,-47.94,83.3,-47.99,58.2,-47.83,36.5,-47.95
2018-01-07 13:00:00,74.9,-47.91,78.9,-47.98,51.9,-47.82,33.0,-47.93
2018-01-07 14:00:00,69.9,-47.9,80.3,-47.99,44.3,-47.8,30.2,-47.89
2018-01-07 15:00:00,71.7,-47.92,87.2,-48.02,40.6,-47.78,31.2,-47.86
2018-01-07 16:00:00,80.6,-47.97,108.2,-48.11,40.8,-47.78,32.3,-47.83
2018-01-07 17:00:00,87.8,-48.0,122.7,-48.17,41.5,-47.78,35.0,-47.81
2018-01-07 18:00:00,97.1,-48.04,134.4,-48.21,43.9,-47.79,38.9,-47.81
2018-01-07 19:00:00,105.2,-48.08,153.1,-48.3,47.2,-47.81,45.2,-47.84
2018-01-07 20:00:00,118.5,-48.13,182.9,-48.42,55.2,-47.85,53.2,-47.89
2018-01-07 21:00:00,136.5,-48.17,209.5,-48.51,63.7,-47.88,65.2,-47.94
2018-01-07 22:00:00,134.4,-48.15,201.9,-48.42,68.8,-47.9,73.8,-47.95
2018-01-07 23:00:00,128.7,-48.13,185.5,-48.33,70.1,-47.88,74.7,-47.95
2018-01-08 00:00:00,137.3,-48.16,210.2,-48.44,76.6,-47.89,75.8,-47.97
2018-01-08 01:00:00,151.7,-48.23,234.8,-48.57,84.4,-47.91,77.2,-47.99
2018-01-08 02:00:00,155.3,-48.24,237.6,-48.58,85.4,-47.92,78.5,-47.99
2018-01-08 03:00:00,146.1,-48.21,198.6,-48.43,84.3,-47.93,75.6,-48.01
2018-01-08 04:00:00,129.2,-48.15,172.1,-48.36,84.3,-47.92,69.5,-48.06
2018-01-08 05:00:00,122.8,-48.13,163.6,-48.32,86.2,-47.91,69.0,-48.07
2018-01-08 06:00:00,126.7,-48.14,170.4,-48.34,88.8,-47.92,71.9,-48.08
2018-01-08 07:00:00,128.5,-48.15,175.2,-48.36,90.9,-47.92,73.6,-48.09
2018-01-08 08:00:00,135.1,-48.17,188.8,-48.4,96.4,-47.93,81.8,-48.09
2018-01-08 09:00:00,144.7,-48.19,197.9,-48.43,103.6,-47.94,87.9,-48.11
2018-01-08 10:00:00,145.3,-48.19,202.3,-48.43,104.2,-47.94,94.4,-48.12
2018-01-08 11:00:00,148.8,-48.19,203.2,-48.43,107.4,-47.94,101.7,-48.14
2018-01-08 12:00:00,147.6,-48.18,200.1,-48.41,108.9,-47.94,102.1,-48.13
2018-01-08 13:00:00,139.9,-48.14,194.6,-48.37,102.9,-47.92,98.6,-48.07
2018-01-08 14:00:00,143.0,-48.14,197.4,-48.37,105.2,-47.92,103.3,-48.07
2018-01-08 15:00:00,148.3,-48.15,204.7,-48.38,109.1,-47.91,106.8,-48.06
2018-01-08 16:00:00,152.6,-48.15,210.1,-48.41,112.8,-47.91,109.8,-48.07
2018-01-08 17:00:00,161.6,-48.17,221.1,-48.42,120.2,-47.92,114.0,-48.06
2018-01-08 18:00:00,162.5,-48.16,231.1,-48.43,119.5,-47.9,114.1,-48.01
2018-01-08 19:00:00,169.6,-48.18,239.0,-48.45,123.0,-47.9,121.0,-48.04
2018-01-08 20:00:00,165.9,-48.14,235.4,-48.41,123.4,-47.87,135.5,-48.09
2018-01-08 21:00:00,174.9,-48.15,240.9,-48.44,128.5,-47.86,137.2,-48.09
2018-01-08 22:00:00,178.8,-48.17,260.5,-48.5,128.5,-47.87,132.5,-48.06
2018-01-08 23:00:00,202.3,-48.23,297.8,-48.6,140.4,-47.87,145.4,-48.05
2018-01-09 00:00:00,205.0,-48.22,285.2,-48.56,143.7,-47.87,135.6,-47.99
2018-01-09 01:00:00,201.4,-48.21,302.5,-48.59,139.3,-47.86,141.1,-47.97
2018-01-09 02:00:00,199.3,-48.2,304.0,-48.6,133.3,-47.84,141.2,-47.97
2018-01-09 03:00:00,187.7,-48.16,282.0,-48.51,127.6,-47.83,131.9,-47.92
2018-01-09 04:00:00,199.0,-48.2,303.7,-48.59,131.5,-47.83,136.4,-47.91
2018-01-09 05:00:00,196.9,-48.18,273.9,-48.48,131.1,-47.81,127.5,-47.87
2018-01-09 06:00:00,207.1,-48.22,314.8,-48.61,135.5,-47.82,133.2,-47.85
2018-01-09 07:00:00,240.7,-48.3,363.4,-48.75,158.0,-47.84,156.2,-47.89
2018-01-09 08:00:00,295.3,-48.47,458.8,-49.0,185.9,-47.89,201.4,-47.97
2018-01-09 09:00:00,282.8,-48.42,395.2,-48.8,186.0,-47.9,207.0,-48.04
2018-01-09 10:00:00,251.4,-48.32,283.8,-48.38,175.1,-47.88,194.4,-47.99
2018-01-09 11:00:00,219.1,-48.2,195.4,-48.06,160.7,-47.84,173.1,-47.95
2018-01-09 12:00:00,187.8,-48.13,160.3,-47.97,144.4,-47.83,153.2,-47.93
2018-01-09 13:00:00,171.1,-48.12,158.2,-48.01,126.1,-47.83,139.0,-47.9
2018-01-09 14:00:00,187.6,-48.19,147.6,-47.99,132.5,-47.86,137.9,-47.91
2018-01-09 15:00:00,210.7,-48.29,150.4,-47.96,136.7,-47.86,139.2,-47.83
2018-01-09 16:00:00,284.0,-48.57,238.1,-48.3,155.2,-47.92,155.0,-47.8
2018-01-09 17:00:00,483.4,-49.2,614.8,-49.47,218.5,-48.04,224.8,-47.76
2018-01-09 18:00:00,497.1,-49.26,604.2,-49.55,227.9,-48.09,219.1,-47.92
2018-01-09 19:00:00,302.4,-48.76,290.7,-48.69,162.4,-48.05,152.4,-47.97
2018-01-09 20:00:00,286.9,-48.73,306.5,-48.79,154.0,-48.07,149.7,-48.03
2018-01-09 21:00:00,299.5,-48.79,323.3,-48.86,159.2,-48.11,151.5,-48.06
2018-01-09 22:00:00,295.2,-48.79,201.0,-48.39,159.7,-48.13,143.7,-47.98
2018-01-09 23:00:00,273.5,-48.72,144.3,-48.17,149.9,-48.11,138.3,-47.98
2018-01-10 00:00:00,212.6,-48.23,139.3,-48.19,150.1,-47.87,116.8,-48.03
2018-01-10 01:00:00,204.9,-48.23,187.0,-48.39,140.8,-47.87,113.7,-48.03
2018-01-10 02:00:00,203.7,-48.22,236.0,-48.57,136.1,-47.85,120.0,-48.02
2018-01-10 03:00:00,195.2,-48.18,181.7,-48.34,133.0,-47.83,119.5,-47.94
2018-01-10 04:00:00,202.6,-48.21,122.7,-48.1,133.6,-47.83,106.7,-47.95
2018-01-10 05:00:00,202.5,-48.21,101.2,-48.03,134.1,-47.83,90.0,-47.99
2018-01-10 06:00:00,213.4,-48.23,98.6,-48.02,139.7,-47.82,91.0,-47.99
2018-01-10 07:00:00,243.5,-48.31,113.1,-48.08,160.6,-47.85,99.5,-48.04
2018-01-10 08:00:00,299.2,-48.47,94.8,-48.01,188.8,-47.89,81.9,-47.98
2018-01-10 09:00:00,287.5,-48.43,89.6,-47.98,189.3,-47.9,77.0,-47.94
2018-01-10 10:00:00,259.1,-48.34,94.0,-48.01,180.0,-47.88,95.4,-48.04
2018-01-10 11:00:00,218.3,-48.21,83.3,-47.97,160.6,-47.84,95.3,-48.03
2018-01-10 12:00:00,190.8,-48.14,82.4,-47.96,146.6,-47.84,90.8,-47.99
2018-01-10 13:00:00,172.5,-48.14,85.4,-47.96,127.2,-47.84,79.3,-47.93
2018-01-10 14:00:00,189.6,-48.2,81.0,-47.94,134.3,-47.86,76.8,-47.91
2018-01-10 15:00:00,214.0,-48.29,91.5,-47.95,138.8,-47.85,91.4,-47.9
2018-01-10 16:00:00,287.9,-48.58,119.0,-47.97,157.4,-47.91,110.3,-47.73
2018-01-10 17:00:00,489.5,-49.21,166.7,-48.0,221.4,-48.04,161.7,-47.53
2018-01-10 18:00:00,494.5,-49.27,219.5,-48.08,225.7,-48.09,215.1,-47.47
2018-01-10 19:00:00,307.7,-48.77,232.6,-48.1,165.3,-48.05,222.1,-47.42
2018-01-10 20:00:00,287.5,-48.73,224.4,-48.1,154.9,-48.07,221.7,-47.48
2018-01-10 21:00:00,294.1,-48.77,268.3,-48.19,156.7,-48.1,249.1,-47.51
2018-01-10 22:00:00,292.7,-48.78,279.6,-48.2,158.7,-48.12,259.1,-47.4
2018-01-10 23:00:00,271.9,-48.71,256.2,-48.16,148.7,-48.1,247.3,-47.36
2018-01-11 00:00:00,493.1,-49.25,250.5,-48.17,194.9,-47.9,231.8,-47.33
2018-01-11 01:00:00,514.2,-49.31,260.1,-48.19,196.9,-47.9,222.1,-47.25
2018-01-11 02:00:00,442.8,-49.08,253.0,-48.17,188.6,-47.75,217.2,-47.29
2018-01-11 03:00:00,524.8,-49.26,305.6,-48.24,234.1,-47.66,259.8,-47.24
2018-01-11 04:00:00,584.4,-49.48,322.9,-48.39,236.4,-47.92,260.3,-47.34
2018-01-11 05:00:00,583.2,-49.49,334.3,-48.5,234.3,-48.15,261.1,-47.63
2018-01-11 06:00:00,489.0,-49.2,323.0,-48.49,211.6,-48.23,244.5,-47.99
2018-01-11 07:00:00,416.3,-48.98,310.5,-48.45,198.9,-48.23,236.2,-48.13
2018-01-11 08:00:00,377.2,-48.83,295.1,-48.43,185.4,-48.2,226.9,-48.2
2018-01-11 09:00:00,361.6,-48.78,275.5,-48.39,178.7,-48.15,215.8,-48.15
2018-01-11 10:00:00,298.7,-48.6,249.2,-48.36,159.3,-48.11,195.1,-48.18
2018-01-11 11:00:00,261.9,-48.51,247.4,-48.43,150.8,-48.11,193.5,-48.23
2018-01-11 12:00:00,240.1,-48.44,233.1,-48.4,142.1,-48.1,186.2,-48.28
2018-01-11 13:00:00,235.3,-48.42,222.3,-48.32,133.5,-48.08,173.3,-48.26
2018-01-11 14:00:00,239.0,-48.43,212.1,-48.28,130.6,-48.05,158.3,-48.21
2018-01-11 15:00:00,244.6,-48.44,214.3,-48.28,127.1,-48.02,158.7,-48.19
2018-01-11 16:00:00,239.8,-48.42,206.3,-48.26,128.3,-48.02,158.0,-48.19
2018-01-11 17:00:00,226.8,-48.38,200.2,-48.24,125.0,-48.01,158.6,-48.16
2018-01-11 18:00:00,254.9,-48.47,217.5,-48.28,137.4,-48.03,172.8,-48.18
2018-01-11 19:00:00,298.9,-48.63,221.0,-48.3,150.3,-48.05,177.8,-48.15
2018-01-11 20:00:00,311.4,-48.7,217.7,-48.32,151.4,-48.05,177.5,-48.14
2018-01-11 21:00:00,284.2,-48.65,195.2,-48.28,136.8,-48.02,159.0,-48.09
2018-01-11 22:00:00,287.0,-48.66,196.0,-48.27,140.9,-48.02,164.1,-48.06
2018-01-11 23:00:00,274.6,-48.64,191.1,-48.29,137.6,-48.02,155.7,-48.07
2018-01-12 00:00:00,301.7,-48.73,197.0,-48.31,143.8,-48.04,150.2,-48.05
2018-01-12 01:00:00,295.7,-48.73,229.3,-48.44,135.2,-48.02,144.2,-47.97
2018-01-12 02:00:00,332.1,-48.85,337.3,-48.82,139.1,-48.02,159.8,-47.95
2018-01-12 03:00:00,403.2,-49.06,365.7,-48.87,160.0,-48.06,172.6,-47.88
2018-01-12 04:00:00,355.3,-48.92,315.0,-48.72,146.9,-48.04,156.1,-47.9
2018-01-12 05:00:00,366.4,-48.96,380.3,-48.97,150.4,-48.06,160.8,-47.92
2018-01-12 06:00:00,440.3,-49.18,668.2,-49.82,174.4,-48.11,181.0,-47.89
2018-01-12 07:00:00,560.3,-49.51,1005.7,-50.58,215.1,-48.18,220.5,-47.93
2018-01-12 08:00:00,561.5,-49.51,832.6,-50.21,225.4,-48.16,208.3,-47.95
2018-01-12 09:00:00,318.7,-48.82,378.6,-49.02,150.5,-48.01,134.8,-47.96
2018-01-12 10:00:00,226.8,-48.5,360.0,-49.0,107.4,-47.91,93.5,-47.88
2018-01-12 11:00:00,143.5,-48.16,179.5,-48.29,73.1,-47.81,74.2,-47.82
2018-01-12 12:00:00,122.4,-48.06,145.5,-48.14,63.8,-47.79,65.6,-47.79
2018-01-12 13:00:00,119.8,-48.06,156.9,-48.21,63.0,-47.79,61.6,-47.79
2018-01-12 14:00:00,130.8,-48.12,157.1,-48.21,70.4,-47.81,65.7,-47.8
2018-01-12 15:00:00,159.9,-48.22,217.0,-48.42,80.6,-47.83,79.7,-47.8
2018-01-12 16:00:00,199.0,-48.34,331.9,-48.82,94.2,-47.85,93.0,-47.78
2018-01-12 17:00:00,265.8,-48.57,461.3,-49.23,116.9,-47.89,111.0,-47.77
2018-01-12 18:00:00,242.1,-48.49,396.0,-49.04,113.9,-47.88,104.5,-47.81
2018-01-12 19:00:00,158.2,-48.22,167.6,-48.24,89.4,-47.87,85.0,-47.86
2018-01-12 20:00:00,133.6,-48.13,97.9,-47.96,82.5,-47.86,78.9,-47.86
2018-01-12 21:00:00,145.4,-48.18,92.8,-47.95,91.7,-47.89,85.9,-47.89
2018-01-12 22:00:00,139.9,-48.17,97.7,-47.97,89.1,-47.87,84.2,-47.89
2018-01-12 23:00:00,150.1,-48.2,133.7,-48.12,93.7,-47.87,85.5,-47.9
2018-01-13 00:00:00,142.1,-48.16,150.8,-48.18,90.1,-47.85,84.1,-47.89
2018-01-13 01:00:00,186.9,-48.32,257.2,-48.6,104.4,-47.87,94.2,-47.89
2018-01-13 02:00:00,207.2,-48.39,320.7,-48.82,109.8,-47.88,97.7,-47.87
2018-01-13 03:00:00,213.0,-48.42,376.6,-49.01,112.1,-47.87,95.8,-47.84
2018-01-13 04:00:00,203.7,-48.38,353.7,-48.94,110.9,-47.86,94.4,-47.85
2018-01-13 05:00:00,211.3,-48.4,333.1,-48.86,120.7,-47.87,109.2,-47.9
2018-01-13 06:00:00,221.7,-48.42,354.8,-48.92,128.8,-47.88,116.2,-47.91
2018-01-13 07:00:00,227.5,-48.45,366.7,-48.96,129.4,-47.88,116.3,-47.9
2018-01-13 08:00:00,216.1,-48.41,333.0,-48.85,131.8,-47.91,123.1,-47.95
2018-01-13 09:00:00,210.5,-48.39,288.6,-48.69,136.9,-47.94,130.4,-48.02
2018-01-13 10:00:00,201.4,-48.37,253.0,-48.57,137.5,-47.96,134.4,-48.08
2018-01-13 11:00:00,162.3,-48.24,177.4,-48.3,120.1,-47.95,114.2,-48.05
2018-01-13 12:00:00,133.5,-48.13,159.0,-48.24,101.6,-47.9,98.6,-48.0
2018-01-13 13:00:00,141.3,-48.15,181.0,-48.32,109.8,-47.91,106.0,-48.02
2018-01-13 14:00:00,134.7,-48.13,176.0,-48.28,102.3,-47.89,106.9,-48.0
2018-01-13 15:00:00,149.1,-48.16,198.3,-48.37,112.2,-47.9,107.4,-47.99
2018-01-13 16:00:00,160.0,-48.19,221.9,-48.43,117.9,-47.89,109.8,-47.97
2018-01-13 17:00:00,158.5,-48.18,219.2,-48.42,114.9,-47.87,107.9,-47.96
2018-01-13 18:00:00,132.4,-48.1,185.6,-48.32,93.6,-47.84,84.5,-47.89
2018-01-13 19:00:00,120.8,-48.07,174.7,-48.29,84.9,-47.83,79.3,-47.88
2018-01-13 20:00:00,120.1,-48.08,167.5,-48.28,87.0,-47.85,80.4,-47.91
2018-01-13 21:00:00,132.7,-48.13,177.2,-48.32,95.8,-47.89,83.7,-47.93
2018-01-13 22:00:00,138.1,-48.15,189.6,-48.37,96.5,-47.89,81.3,-47.92
2018-01-13 23:00:00,159.6,-48.24,230.9,-48.52,104.6,-47.91,90.3,-47.92
2018-01-14 00:00:00,164.6,-48.26,260.8,-48.63,105.7,-47.92,98.0,-47.94
2018-01-14 01:00:00,154.2,-48.21,240.7,-48.55,99.4,-47.9,105.2,-47.98
2018-01-14 02:00:00,187.9,-48.33,315.1,-48.79,111.7,-47.91,120.5,-47.96
2018-01-14 03:00:00,318.5,-48.76,590.0,-49.59,151.5,-47.97,166.4,-47.87
2018-01-14 04:00:00,368.2,-48.91,555.5,-49.49,160.0,-47.99,157.8,-47.73
2018-01-14 05:00:00,299.3,-48.69,487.4,-49.3,139.2,-47.95,134.4,-47.75
2018-01-14 06:00:00,267.4,-48.58,423.7,-49.11,128.8,-47.92,121.2,-47.77
2018-01-14 07:00:00,325.9,-48.76,530.7,-49.42,149.0,-47.96,137.9,-47.76
2018-01-14 08:00:00,329.0,-48.74,504.3,-49.33,155.4,-47.96,145.9,-47.77
2018-01-14 09:00:00,240.6,-48.43,310.8,-48.72,135.8,-47.9,118.5,-47.84
2018-01-14 10:00:00,180.2,-48.21,238.3,-48.45,119.5,-47.86,110.7,-47.9
2018-01-14 11:00:00,166.4,-48.15,220.4,-48.39,117.1,-47.85,114.8,-47.96
2018-01-14 12:00:00,186.8,-48.22,243.9,-48.47,124.5,-47.86,120.4,-47.95
2018-01-14 13:00:00,197.7,-48.27,261.8,-48.54,127.2,-47.88,123.0,-47.95
2018-01-14 14:00:00,203.8,-48.29,257.1,-48.52,128.0,-47.87,121.3,-47.92
2018-01-14 15:00:00,200.5,-48.29,195.9,-48.25,123.3,-47.86,118.8,-47.86
2018-01-14 16:00:00,210.8,-48.31,159.4,-48.08,133.1,-47.83,119.1,-47.83
2018-01-14 17:00:00,212.5,-48.3,152.7,-48.0,139.8,-47.78,122.4,-47.79
2018-01-14 18:00:00,269.8,-48.49,186.1,-48.05,169.8,-47.75,144.7,-47.75
2018-01-14 19:00:00,351.6,-48.72,248.3,-48.18,220.5,-47.71,185.1,-47.72
2018-01-14 20:00:00,351.8,-48.73,240.7,-48.2,226.4,-47.76,187.9,-47.82
2018-01-14 21:00:00,264.9,-48.5,194.1,-48.16,181.0,-47.83,156.3,-47.91
2018-01-14 22:00:00,238.5,-48.42,182.1,-48.14,164.4,-47.82,143.3,-47.89
2018-01-14 23:00:00,215.8,-48.36,163.7,-48.1,145.6,-47.85,131.2,-47.89
2018-01-15 00:00:00,170.1,-48.25,130.0,-48.03,113.0,-47.85,95.4,-47.84
2018-01-15 01:00:00,163.4,-48.26,121.4,-48.05,110.5,-47.88,86.3,-47.88
2018-01-15 02:00:00,146.5,-48.21,104.3,-48.01,102.1,-47.88,78.8,-47.89
2018-01-15 03:00:00,123.3,-48.13,82.4,-47.93,83.7,-47.85,63.3,-47.84
2018-01-15 04:00:00,95.5,-48.04,64.7,-47.89,64.9,-47.84,51.4,-47.85
2018-01-15 05:00:00,78.4,-48.0,52.8,-47.87,56.7,-47.85,44.6,-47.9
2018-01-15 06:00:00,73.5,-47.98,53.3,-47.88,52.2,-47.84,42.3,-47.9
2018-01-15 07:00:00,63.6,-47.92,46.9,-47.84,42.6,-47.77,34.3,-47.83
2018-01-15 08:00:00,50.5,-47.84,30.8,-47.74,33.0,-47.72,24.3,-47.76
2018-01-15 09:00:00,47.2,-47.8,24.9,-47.69,26.6,-47.66,19.0,-47.69
2018-01-15 10:00:00,73.5,-47.9,32.9,-47.69,35.8,-47.64,24.4,-47.64
2018-01-15 11:00:00,71.8,-47.89,35.7,-47.69,35.1,-47.62,24.4,-47.63
2018-01-15 12:00:00,53.2,-47.81,29.8,-47.68,32.1,-47.64,22.3,-47.66
2018-01-15 13:00:00,51.1,-47.81,38.0,-47.74,44.6,-47.71,31.9,-47.72
2018-01-15 14:00:00,51.3,-47.81,43.5,-47.76,40.1,-47.69,50.5,-47.79
2018-01-15 15:00:00,63.3,-47.85,59.8,-47.82,48.7,-47.7,61.6,-47.8
2018-01-15 16:00:00,69.7,-47.9,72.0,-47.9,49.3,-47.73,73.5,-47.9
2018-01-15 17:00:00,64.6,-47.88,62.2,-47.87,42.5,-47.71,57.2,-47.87
2018-01-15 18:00:00,72.9,-47.92,71.5,-47.91,50.0,-47.73,67.4,-47.89
2018-01-15 19:00:00,84.7,-47.96,87.1,-47.97,66.9,-47.79,84.2,-47.98
2018-01-15 20:00:00,70.2,-47.9,66.4,-47.87,57.2,-47.76,67.2,-47.9
2018-01-15 21:00:00,61.7,-47.86,54.3,-47.81,52.6,-47.73,37.8,-47.75
2018-01-15 22:00:00,61.1,-47.86,48.5,-47.79,54.7,-47.74,33.9,-47.76
2018-01-15 23:00:00,55.0,-47.85,44.8,-47.79,50.1,-47.74,33.3,-47.79
2018-01-16 00:00:00,47.5,-47.8,39.1,-47.76,42.0,-47.71,29.0,-47.74
2018-01-16 01:00:00,44.8,-47.79,37.1,-47.74,39.7,-47.7,31.3,-47.75
2018-01-16 02:00:00,46.5,-47.79,41.7,-47.76,37.2,-47.69,43.7,-47.78
2018-01-16 03:00:00,43.1,-47.77,38.8,-47.74,34.8,-47.68,42.7,-47.77
2018-01-16 04:00:00,41.1,-47.77,38.6,-47.74,33.6,-47.69,40.2,-47.76
2018-01-16 05:00:00,48.6,-47.8,46.7,-47.79,38.5,-47.7,42.0,-47.75
2018-01-16 06:00:00,50.7,-47.81,50.7,-47.81,37.4,-47.68,39.7,-47.72
2018-01-16 07:00:00,51.5,-47.81,51.3,-47.81,37.9,-47.68,43.1,-47.73
2018-01-16 08:00:00,51.8,-47.82,51.8,-47.81,39.7,-47.7,53.1,-47.8
2018-01-16 09:00:00,41.0,-47.77,39.2,-47.75,33.0,-47.68,41.7,-47.76
2018-01-16 10:00:00,37.0,-47.75,33.7,-47.73,29.8,-47.67,34.5,-47.73
2018-01-16 11:00:00,33.9,-47.74,32.5,-47.73,26.1,-47.67,36.7,-47.74
2018-01-16 12:00:00,28.2,-47.71,28.8,-47.72,21.8,-47.66,28.7,-47.71
2018-01-16 13:00:00,27.9,-47.71,28.6,-47.72,21.1,-47.65,27.0,-47.71
2018-01-16 14:00:00,27.8,-47.71,28.1,-47.71,20.7,-47.65,26.6,-47.7
2018-01-16 15:00:00,29.7,-47.71,27.2,-47.7,23.4,-47.65,28.8,-47.71
2018-01-16 16:00:00,29.0,-47.71,24.6,-47.68,24.2,-47.65,18.4,-47.66
2018-01-16 17:00:00,25.2,-47.69,21.6,-47.67,21.2,-47.64,24.0,-47.7
2018-01-16 18:00:00,29.9,-47.72,23.9,-47.69,25.5,-47.66,21.2,-47.69
2018-01-16 19:00:00,34.9,-47.74,26.8,-47.69,27.6,-47.66,25.6,-47.69
2018-01-16 20:00:00,41.5,-47.76,33.9,-47.71,31.0,-47.66,33.8,-47.7
2018-01-16 21:00:00,46.4,-47.78,38.9,-47.73,36.4,-47.67,34.9,-47.7
2018-01-16 22:00:00,47.4,-47.78,39.9,-47.74,39.4,-47.68,35.0,-47.71
2018-01-16 23:00:00,45.3,-47.78,39.5,-47.74,36.8,-47.69,43.1,-47.75
2018-01-17 00:00:00,42.8,-47.76,38.7,-47.74,32.3,-47.66,40.4,-47.72
2018-01-17 01:00:00,40.9,-47.76,38.1,-47.74,30.0,-47.66,36.3,-47.71
2018-01-17 02:00:00,37.8,-47.74,33.9,-47.72,27.8,-47.65,31.0,-47.69
2018-01-17 03:00:00,41.5,-47.76,37.7,-47.74,30.2,-47.66,32.4,-47.69
2018-01-17 04:00:00,45.6,-47.78,43.1,-47.77,33.5,-47.66,37.2,-47.71
2018-01-17 05:00:00,46.7,-47.79,44.6,-47.78,33.5,-47.67,45.5,-47.75
2018-01-17 06:00:00,49.0,-47.8,45.2,-47.78,35.3,-47.68,39.2,-47.72
2018-01-17 07:00:00,51.1,-47.81,46.5,-47.79,37.1,-47.69,44.1,-47.75
2018-01-17 08:00:00,54.0,-47.82,50.2,-47.81,39.0,-47.69,48.6,-47.77
2018-01-17 09:00:00,48.4,-47.8,45.3,-47.79,35.8,-47.69,43.8,-47.77
2018-01-17 10:00:00,43.4,-47.78,41.3,-47.78,32.8,-47.69,38.8,-47.76
2018-01-17 11:00:00,38.5,-47.76,38.5,-47.77,28.7,-47.68,38.1,-47.77
2018-01-17 12:00:00,33.8,-47.74,35.2,-47.76,24.9,-47.67,33.7,-47.76
2018-01-17 13:00:00,32.1,-47.73,33.9,-47.75,23.6,-47.67,33.3,-47.76
2018-01-17 14:00:00,36.7,-47.75,40.2,-47.78,27.2,-47.67,35.5,-47.76
2018-01-17 15:00:00,39.9,-47.76,39.8,-47.76,29.8,-47.67,34.2,-47.73
2018-01-17 16:00:00,50.9,-47.8,46.8,-47.77,37.5,-47.68,46.5,-47.75
2018-01-17 17:00:00,64.6,-47.85,53.1,-47.78,49.7,-47.69,53.2,-47.76
2018-01-17 18:00:00,69.1,-47.87,50.0,-47.76,57.1,-47.7,32.5,-47.67
2018-01-17 19:00:00,58.6,-47.83,35.2,-47.71,47.3,-47.68,31.4,-47.69
2018-01-17 20:00:00,60.5,-47.85,32.4,-47.71,45.1,-47.69,34.8,-47.71
2018-01-17 21:00:00,67.6,-47.87,38.5,-47.73,42.0,-47.68,35.7,-47.68
2018-01-17 22:00:00,49.9,-47.79,30.6,-47.7,27.3,-47.63,22.9,-47.65
2018-01-17 23:00:00,36.2,-47.73,17.3,-47.63,19.1,-47.6,11.0,-47.61
2018-01-18 00:00:00,30.7,-47.7,13.1,-47.61,15.5,-47.58,9.1,-47.58
2018-01-18 01:00:00,31.1,-47.7,16.1,-47.63,21.0,-47.61,13.4,-47.61
2018-01-18 02:00:00,30.8,-47.71,20.5,-47.66,26.3,-47.64,15.7,-47.63
2018-01-18 03:00:00,26.1,-47.7,19.1,-47.66,23.4,-47.65,17.1,-47.67
2018-01-18 04:00:00,20.5,-47.67,16.5,-47.64,15.7,-47.62,16.4,-47.66
2018-01-18 05:00:00,24.6,-47.69,22.1,-47.68,18.6,-47.63,20.9,-47.67
2018-01-18 06:00:00,32.9,-47.73,28.3,-47.71,21.7,-47.64,24.9,-47.71
2018-01-18 07:00:00,40.7,-47.78,32.5,-47.76,27.9,-47.68,30.2,-47.76
2018-01-18 08:00:00,47.4,-47.81,40.9,-47.8,31.5,-47.69,38.4,-47.8
2018-01-18 09:00:00,49.0,-47.82,46.6,-47.81,32.2,-47.68,43.1,-47.8
2018-01-18 10:00:00,44.6,-47.79,43.8,-47.79,31.8,-47.68,42.1,-47.77
2018-01-18 11:00:00,38.3,-47.76,38.2,-47.76,28.1,-47.68,37.8,-47.75
2018-01-18 12:00:00,31.9,-47.73,33.3,-47.74,23.8,-47.66,33.0,-47.74
2018-01-18 13:00:00,34.5,-47.73,35.7,-47.74,25.1,-47.65,36.0,-47.74
2018-01-18 14:00:00,42.6,-47.77,42.5,-47.77,29.3,-47.66,38.9,-47.76
2018-01-18 15:00:00,43.4,-47.77,44.6,-47.78,29.0,-47.67,41.9,-47.76
2018-01-18 16:00:00,56.0,-47.82,59.9,-47.83,39.1,-47.68,59.6,-47.8
2018-01-18 17:00:00,64.2,-47.86,70.3,-47.89,43.8,-47.69,64.5,-47.82
2018-01-18 18:00:00,69.1,-47.88,75.7,-47.92,46.9,-47.7,69.4,-47.85
2018-01-18 19:00:00,75.0,-47.91,77.1,-47.92,48.8,-47.7,69.9,-47.84
2018-01-18 20:00:00,84.3,-47.95,83.7,-47.94,54.5,-47.71,80.1,-47.88
2018-01-18 21:00:00,90.5,-47.98,92.9,-47.99,59.1,-47.73,87.7,-47.9
2018-01-18 22:00:00,99.6,-48.01,105.0,-48.03,68.3,-47.74,93.8,-47.88
2018-01-18 23:00:00,105.0,-48.02,109.5,-48.03,75.7,-47.74,95.1,-47.88
2018-01-19 00:00:00,110.8,-48.03,111.0,-48.01,79.3,-47.74,110.0,-47.94
2018-01-19 01:00:00,118.4,-48.05,114.3,-48.0,84.1,-47.74,106.5,-47.89
2018-01-19 02:00:00,136.6,-48.11,123.6,-48.01,99.8,-47.74,101.5,-47.82
2018-01-19 03:00:00,152.6,-48.17,130.6,-48.02,114.4,-47.76,98.3,-47.76
2018-01-19 04:00:00,171.6,-48.23,138.1,-48.03,133.9,-47.78,96.8,-47.72
2018-01-19 05:00:00,170.6,-48.24,133.3,-48.02,137.1,-47.81,99.2,-47.78
2018-01-19 06:00:00,169.9,-48.26,132.5,-48.04,138.8,-47.86,102.5,-47.84
2018-01-19 07:00:00,193.1,-48.34,143.6,-48.06,151.0,-47.86,109.5,-47.81
2018-01-19 08:00:00,202.5,-48.36,145.3,-48.04,149.1,-47.81,107.5,-47.76
2018-01-19 09:00:00,164.1,-48.22,117.8,-47.97,124.2,-47.77,91.0,-47.79
2018-01-19 10:00:00,97.2,-48.0,99.5,-47.99,92.3,-47.82,76.9,-47.89
2018-01-19 11:00:00,68.9,-47.9,82.6,-47.96,65.8,-47.8,72.8,-47.94
2018-01-19 12:00:00,53.7,-47.83,68.9,-47.9,45.6,-47.74,67.4,-47.92
2018-01-19 13:00:00,45.8,-47.79,54.9,-47.84,38.5,-47.71,57.7,-47.87
2018-01-19 14:00:00,42.2,-47.78,47.2,-47.81,36.2,-47.71,48.7,-47.86
2018-01-19 15:00:00,45.1,-47.8,44.4,-47.79,37.8,-47.72,44.4,-47.86
2018-01-19 16:00:00,61.0,-47.86,52.6,-47.81,51.2,-47.73,41.6,-47.81
2018-01-19 17:00:00,75.2,-47.9,61.5,-47.82,63.6,-47.72,41.4,-47.73
2018-01-19 18:00:00,74.2,-47.89,60.2,-47.81,63.6,-47.71,39.9,-47.71
2018-01-19 19:00:00,72.9,-47.88,60.2,-47.81,60.0,-47.7,39.5,-47.7
2018-01-19 20:00:00,78.2,-47.91,62.0,-47.82,63.9,-47.71,43.8,-47.72
2018-01-19 21:00:00,89.9,-47.96,64.4,-47.82,71.6,-47.73,51.1,-47.74
2018-01-19 22:00:00,105.0,-48.02,60.1,-47.79,73.5,-47.71,61.1,-47.77
2018-01-19 23:00:00,115.7,-48.06,66.5,-47.82,71.7,-47.7,65.2,-47.77
2018-01-20 00:00:00,123.5,-48.08,73.0,-47.83,75.5,-47.69,70.5,-47.74
2018-01-20 01:00:00,137.3,-48.13,77.8,-47.82,81.5,-47.68,73.6,-47.71
2018-01-20 02:00:00,155.3,-48.19,93.0,-47.87,83.5,-47.65,75.7,-47.68
2018-01-20 03:00:00,171.5,-48.25,110.5,-47.93,85.0,-47.64,79.0,-47.66
2018-01-20 04:00:00,159.3,-48.21,105.8,-47.92,76.9,-47.64,70.6,-47.64
2018-01-20 05:00:00,120.2,-48.06,80.6,-47.83,58.6,-47.63,54.7,-47.62
2018-01-20 06:00:00,108.0,-48.02,78.6,-47.85,52.0,-47.62,46.6,-47.63
2018-01-20 07:00:00,92.0,-47.96,59.2,-47.79,38.1,-47.65,34.3,-47.62
2018-01-20 08:00:00,114.4,-48.05,134.2,-48.11,44.4,-47.68,41.7,-47.61
2018-01-20 09:00:00,142.2,-48.15,303.7,-48.76,53.8,-47.7,55.5,-47.62
2018-01-20 10:00:00,131.0,-48.11,297.5,-48.75,48.3,-47.69,63.3,-47.66
2018-01-20 11:00:00,121.6,-48.08,240.6,-48.55,46.7,-47.69,73.9,-47.76
2018-01-20 12:00:00,98.2,-47.98,205.6,-48.42,36.6,-47.67,57.2,-47.71
2018-01-20 13:00:00,138.6,-48.14,301.9,-48.76,47.8,-47.69,63.9,-47.62
2018-01-20 14:00:00,137.6,-48.13,271.5,-48.65,46.0,-47.69,60.8,-47.6
2018-01-20 15:00:00,135.0,-48.12,203.4,-48.4,40.8,-47.68,55.8,-47.61
2018-01-20 16:00:00,108.1,-48.02,145.6,-48.18,34.4,-47.67,44.8,-47.64
2018-01-20 17:00:00,130.5,-48.1,144.2,-48.16,40.1,-47.69,55.7,-47.68
2018-01-20 18:00:00,140.1,-48.14,97.8,-47.94,44.2,-47.7,52.5,-47.64
2018-01-20 19:00:00,118.0,-48.05,68.5,-47.82,37.9,-47.68,44.8,-47.61
2018-01-20 20:00:00,123.6,-48.08,64.0,-47.81,39.8,-47.69,42.9,-47.63
2018-01-20 21:00:00,108.6,-48.03,57.7,-47.8,38.7,-47.69,43.6,-47.67
2018-01-20 22:00:00,83.8,-47.93,51.8,-47.78,35.3,-47.68,40.1,-47.67
2018-01-20 23:00:00,84.4,-47.93,64.8,-47.83,40.7,-47.69,49.0,-47.69
2018-01-21 00:00:00,95.6,-47.94,87.5,-47.87,49.0,-47.71,67.6,-47.74
2018-01-21 01:00:00,119.9,-48.01,104.2,-47.86,62.5,-47.71,84.5,-47.75
2018-01-21 02:00:00,131.0,-48.06,112.6,-47.89,72.9,-47.7,99.1,-47.8
2018-01-21 03:00:00,136.6,-48.1,113.2,-47.95,77.0,-47.74,105.5,-47.82
2018-01-21 04:00:00,143.7,-48.15,118.2,-48.01,76.6,-47.79,107.4,-47.83
2018-01-21 05:00:00,144.6,-48.15,127.9,-48.05,80.6,-47.77,106.5,-47.85
2018-01-21 06:00:00,142.6,-48.14,129.7,-48.05,81.6,-47.74,111.7,-47.86
2018-01-21 07:00:00,161.8,-48.2,139.7,-48.06,89.9,-47.74,116.7,-47.84
2018-01-21 08:00:00,163.8,-48.2,135.4,-48.02,94.5,-47.69,103.7,-47.79
2018-01-21 09:00:00,173.2,-48.27,144.5,-48.08,83.0,-47.72,89.1,-47.77
2018-01-21 10:00:00,209.5,-48.4,292.9,-48.68,90.2,-47.77,102.0,-47.77
2018-01-21 11:00:00,196.6,-48.35,368.7,-48.99,84.1,-47.77,84.7,-47.76
2018-01-21 12:00:00,146.0,-48.17,265.0,-48.64,66.7,-47.73,72.8,-47.77
2018-01-21 13:00:00,144.8,-48.17,282.1,-48.71,65.9,-47.73,73.9,-47.77
2018-01-21 14:00:00,148.5,-48.18,289.5,-48.74,61.8,-47.73,66.6,-47.75
2018-01-21 15:00:00,210.5,-48.41,414.0,-49.14,81.8,-47.77,86.2,-47.77
2018-01-21 16:00:00,327.4,-48.8,614.2,-49.68,121.0,-47.86,123.5,-47.72
2018-01-21 17:00:00,436.4,-49.14,830.1,-50.19,160.3,-47.95,154.4,-47.67
2018-01-21 18:00:00,456.9,-49.2,1005.6,-50.59,170.8,-47.98,165.0,-47.71
2018-01-21 19:00:00,541.0,-49.42,592.7,-49.42,207.6,-47.97,197.0,-47.49
2018-01-21 20:00:00,307.1,-48.65,215.5,-48.16,181.4,-47.67,152.3,-47.6
2018-01-21 21:00:00,154.7,-48.15,130.0,-47.99,114.6,-47.72,126.9,-47.83
2018-01-21 22:00:00,90.0,-47.92,78.7,-47.83,63.7,-47.65,76.0,-47.72
2018-01-21 23:00:00,84.0,-47.9,72.4,-47.81,58.8,-47.65,62.5,-47.69
2018-01-22 00:00:00,99.7,-47.95,83.9,-47.84,68.9,-47.66,80.5,-47.73
2018-01-22 01:00:00,120.1,-48.03,102.7,-47.9,81.9,-47.69,99.4,-47.75
2018-01-22 02:00:00,146.5,-48.14,121.8,-47.96,93.1,-47.72,113.6,-47.73
2018-01-22 03:00:00,175.7,-48.23,151.6,-48.05,117.6,-47.71,134.5,-47.8
2018-01-22 04:00:00,143.9,-48.12,141.9,-48.08,108.6,-47.75,131.4,-47.94
2018-01-22 05:00:00,132.3,-48.1,134.5,-48.06,98.8,-47.77,140.5,-47.99
2018-01-22 06:00:00,141.5,-48.13,141.6,-48.08,106.1,-47.79,149.0,-47.99
2018-01-22 07:00:00,146.1,-48.15,154.4,-48.15,109.5,-47.8,151.0,-48.04
2018-01-22 08:00:00,155.6,-48.19,147.1,-48.11,104.3,-47.79,130.2,-47.96
2018-01-22 09:00:00,150.8,-48.18,124.1,-48.04,91.8,-47.75,116.7,-47.91
2018-01-22 10:00:00,104.6,-48.03,94.4,-48.01,62.4,-47.75,94.6,-47.95
2018-01-22 11:00:00,85.2,-47.97,88.8,-48.03,51.1,-47.76,84.1,-47.99
2018-01-22 12:00:00,71.5,-47.92,85.1,-48.03,44.1,-47.75,79.8,-48.01
2018-01-22 13:00:00,60.1,-47.87,77.5,-48.0,40.0,-47.73,71.6,-48.0
2018-01-22 14:00:00,48.8,-47.81,67.3,-47.95,33.4,-47.7,62.2,-47.94
2018-01-22 15:00:00,49.1,-47.81,66.1,-47.95,33.0,-47.71,61.6,-47.93
2018-01-22 16:00:00,57.2,-47.84,61.1,-47.89,35.3,-47.7,58.3,-47.86
2018-01-22 17:00:00,75.7,-47.9,61.9,-47.84,40.6,-47.67,62.4,-47.76
2018-01-22 18:00:00,99.2,-47.97,70.5,-47.82,52.8,-47.63,69.1,-47.72
2018-01-22 19:00:00,149.5,-48.15,124.4,-47.99,85.8,-47.66,125.2,-47.81
2018-01-22 20:00:00,194.2,-48.29,198.7,-48.24,130.1,-47.71,167.3,-47.91
2018-01-22 21:00:00,170.2,-48.22,144.3,-48.06,123.5,-47.76,112.1,-47.83
2018-01-22 22:00:00,145.4,-48.13,104.9,-47.9,105.8,-47.71,86.4,-47.74
2018-01-22 23:00:00,149.7,-48.19,96.0,-47.92,111.2,-47.79,92.0,-47.87
2018-01-23 00:00:00,148.4,-48.19,95.3,-47.94,93.0,-47.77,90.6,-47.9
2018-01-23 01:00:00,117.8,-48.06,81.1,-47.89,72.5,-47.73,75.0,-47.84
2018-01-23 02:00:00,102.1,-47.99,72.8,-47.85,62.4,-47.69,62.8,-47.78
2018-01-23 03:00:00,121.6,-48.06,84.9,-47.87,68.7,-47.68,66.7,-47.74
2018-01-23 04:00:00,154.7,-48.18,102.7,-47.89,80.1,-47.66,72.5,-47.69
2018-01-23 05:00:00,130.6,-48.09,80.7,-47.82,65.0,-47.63,55.5,-47.64
2018-01-23 06:00:00,105.7,-47.99,64.3,-47.77,51.3,-47.62,37.6,-47.61
2018-01-23 07:00:00,85.5,-47.96,65.9,-47.85,46.9,-47.71,36.5,-47.77
2018-01-23 08:00:00,83.5,-47.98,70.3,-47.91,51.5,-47.77,46.5,-47.86
2018-01-23 09:00:00,81.3,-47.97,65.1,-47.89,49.9,-47.76,45.0,-47.85
2018-01-23 10:00:00,71.8,-47.9,44.2,-47.76,40.0,-47.68,31.7,-47.72
2018-01-23 11:00:00,56.0,-47.8,30.6,-47.66,28.3,-47.6,21.6,-47.6
2018-01-23 12:00:00,42.0,-47.73,18.9,-47.61,20.4,-47.57,14.1,-47.56
2018-01-23 13:00:00,39.0,-47.72,17.0,-47.6,18.4,-47.57,12.7,-47.55
2018-01-23 14:00:00,41.4,-47.73,19.0,-47.6,19.7,-47.56,13.3,-47.55
2018-01-23 15:00:00,45.5,-47.74,22.2,-47.62,21.4,-47.56,14.7,-47.55
2018-01-23 16:00:00,43.1,-47.74,21.8,-47.62,20.3,-47.57,14.3,-47.56
2018-01-23 17:00:00,35.5,-47.7,16.1,-47.6,17.6,-47.56,11.5,-47.56
2018-01-23 18:00:00,35.2,-47.7,18.0,-47.61,19.8,-47.57,14.3,-47.57
2018-01-23 19:00:00,46.9,-47.75,26.0,-47.63,29.8,-47.59,21.1,-47.59
2018-01-23 20:00:00,70.7,-47.84,34.8,-47.65,42.7,-47.61,30.3,-47.59
2018-01-23 21:00:00,85.9,-47.91,46.0,-47.69,43.9,-47.59,32.3,-47.59
2018-01-23 22:00:00,76.8,-47.88,43.0,-47.69,38.1,-47.59,25.9,-47.59
2018-01-23 23:00:00,73.9,-47.86,38.2,-47.67,37.3,-47.58,26.0,-47.57
2018-01-24 00:00:00,71.1,-47.84,38.2,-47.67,34.2,-47.57,25.3,-47.57
2018-01-24 01:00:00,52.9,-47.77,30.9,-47.66,26.0,-47.57,19.8,-47.58
2018-01-24 02:00:00,45.4,-47.74,25.8,-47.64,23.0,-47.58,17.1,-47.58
2018-01-24 03:00:00,43.6,-47.74,24.0,-47.64,23.0,-47.59,15.5,-47.6
2018-01-24 04:00:00,37.6,-47.72,22.9,-47.65,21.2,-47.6,14.8,-47.63
2018-01-24 05:00:00,32.7,-47.7,19.3,-47.63,18.1,-47.6,12.1,-47.62
2018-01-24 06:00:00,27.0,-47.68,15.5,-47.62,14.8,-47.6,9.7,-47.61
2018-01-24 07:00:00,25.2,-47.67,13.8,-47.62,14.1,-47.6,8.8,-47.61
2018-01-24 08:00:00,24.8,-47.67,13.9,-47.61,13.6,-47.59,8.9,-47.6
2018-01-24 09:00:00,28.3,-47.68,15.0,-47.62,14.8,-47.59,9.7,-47.6
2018-01-24 10:00:00,28.0,-47.69,15.4,-47.62,15.7,-47.6,10.3,-47.62
2018-01-24 11:00:00,24.6,-47.67,13.1,-47.62,14.4,-47.6,9.1,-47.62
2018-01-24 12:00:00,27.1,-47.68,15.7,-47.62,17.0,-47.6,11.0,-47.62
2018-01-24 13:00:00,33.1,-47.7,27.9,-47.67,28.4,-47.63,29.1,-47.69
2018-01-24 14:00:00,38.6,-47.72,31.9,-47.68,27.1,-47.61,33.5,-47.68
2018-01-24 15:00:00,38.1,-47.72,26.5,-47.65,25.3,-47.61,22.2,-47.64
2018-01-24 16:00:00,43.9,-47.74,21.9,-47.62,27.9,-47.61,19.5,-47.61
2018-01-24 17:00:00,57.9,-47.79,30.3,-47.65,30.3,-47.59,21.5,-47.61
2018-01-24 18:00:00,57.5,-47.8,34.1,-47.68,30.7,-47.6,21.4,-47.62
2018-01-24 19:00:00,71.1,-47.85,38.7,-47.68,36.8,-47.6,24.3,-47.61
2018-01-24 20:00:00,82.5,-47.89,42.3,-47.68,41.1,-47.59,27.7,-47.59
2018-01-24 21:00:00,90.3,-47.92,48.9,-47.7,44.7,-47.59,30.7,-47.58
2018-01-24 22:00:00,102.9,-47.97,53.2,-47.71,50.2,-47.58,33.2,-47.57
2018-01-24 23:00:00,110.9,-48.0,56.1,-47.71,55.0,-47.59,36.2,-47.57
2018-01-25 00:00:00,116.2,-48.01,58.4,-47.71,58.3,-47.59,38.0,-47.57
2018-01-25 01:00:00,113.9,-48.0,56.0,-47.7,57.1,-47.59,37.5,-47.55
2018-01-25 02:00:00,124.9,-48.04,61.4,-47.71,61.0,-47.58,40.3,-47.55
2018-01-25 03:00:00,133.0,-48.08,64.8,-47.73,63.7,-47.59,42.6,-47.55
2018-01-25 04:00:00,130.0,-48.06,65.2,-47.73,61.9,-47.59,42.1,-47.55
2018-01-25 05:00:00,113.4,-48.0,58.6,-47.71,55.6,-47.59,38.4,-47.56
2018-01-25 06:00:00,121.6,-48.03,63.9,-47.73,59.7,-47.58,40.9,-47.55
2018-01-25 07:00:00,126.7,-48.04,66.4,-47.73,61.9,-47.57,43.0,-47.54
2018-01-25 08:00:00,119.9,-48.02,63.7,-47.73,58.2,-47.58,40.9,-47.56
2018-01-25 09:00:00,88.9,-47.9,54.4,-47.73,46.2,-47.6,30.4,-47.6
2018-01-25 10:00:00,65.4,-47.81,38.3,-47.67,36.9,-47.6,23.5,-47.6
2018-01-25 11:00:00,52.6,-47.76,31.4,-47.65,31.4,-47.59,20.5,-47.61
2018-01-25 12:00:00,45.5,-47.74,26.2,-47.64,27.6,-47.6,18.4,-47.62
2018-01-25 13:00:00,47.8,-47.75,28.8,-47.65,29.0,-47.6,19.4,-47.62
2018-01-25 14:00:00,41.1,-47.71,22.2,-47.62,24.7,-47.59,15.6,-47.6
2018-01-25 15:00:00,42.7,-47.72,22.5,-47.62,24.3,-47.58,15.6,-47.59
2018-01-25 16:00:00,60.4,-47.79,30.7,-47.64,32.0,-47.59,20.1,-47.59
2018-01-25 17:00:00,78.5,-47.86,37.4,-47.65,39.7,-47.59,25.7,-47.57
2018-01-25 18:00:00,99.4,-47.95,48.5,-47.69,48.7,-47.6,32.4,-47.56
2018-01-25 19:00:00,101.3,-47.96,51.1,-47.7,47.7,-47.6,31.5,-47.56
2018-01-25 20:00:00,97.5,-47.95,59.4,-47.75,46.9,-47.61,33.2,-47.58
2018-01-25 21:00:00,111.5,-47.99,66.0,-47.76,54.8,-47.61,38.7,-47.57
2018-01-25 22:00:00,123.9,-48.03,67.9,-47.74,61.4,-47.59,42.8,-47.55
2018-01-25 23:00:00,170.8,-48.2,92.1,-47.78,84.8,-47.55,57.2,-47.49
2018-01-26 00:00:00,206.3,-48.32,106.0,-47.8,102.6,-47.56,72.2,-47.47
2018-01-26 01:00:00,248.9,-48.46,127.5,-47.84,119.5,-47.56,84.5,-47.44
2018-01-26 02:00:00,240.4,-48.43,134.7,-47.87,123.7,-47.54,88.7,-47.45
2018-01-26 03:00:00,190.9,-48.26,124.2,-47.9,119.0,-47.62,90.5,-47.56
2018-01-26 04:00:00,179.4,-48.22,139.0,-47.97,135.1,-47.73,103.0,-47.64
2018-01-26 05:00:00,222.2,-48.35,195.2,-48.15,179.5,-47.8,153.7,-47.76
2018-01-26 06:00:00,293.8,-48.58,243.5,-48.25,216.4,-47.83,214.0,-47.81
2018-01-26 07:00:00,313.5,-48.66,239.6,-48.23,211.6,-47.83,242.1,-47.86
2018-01-26 08:00:00,300.8,-48.64,208.2,-48.15,177.7,-47.81,219.3,-47.81
2018-01-26 09:00:00,278.2,-48.62,176.7,-48.2,126.8,-47.9,147.9,-47.84
2018-01-26 10:00:00,202.9,-48.42,164.4,-48.28,93.3,-47.93,104.1,-48.0
2018-01-26 11:00:00,163.0,-48.27,147.6,-48.21,87.3,-47.93,101.5,-48.04
2018-01-26 12:00:00,153.1,-48.2,147.4,-48.17,88.2,-47.93,104.8,-48.06
2018-01-26 13:00:00,145.0,-48.14,140.3,-48.09,82.6,-47.89,103.2,-48.05
2018-01-26 14:00:00,135.4,-48.08,129.0,-48.02,76.4,-47.86,97.5,-48.02
2018-01-26 15:00:00,125.3,-48.03,117.8,-47.94,70.3,-47.83,84.6,-47.94
2018-01-26 16:00:00,142.7,-48.09,122.3,-47.94,74.4,-47.82,90.3,-47.88
2018-01-26 17:00:00,196.9,-48.27,150.1,-47.97,93.9,-47.85,117.7,-47.8
2018-01-26 18:00:00,251.6,-48.42,178.5,-48.01,115.1,-47.86,148.8,-47.72
2018-01-26 19:00:00,287.1,-48.54,208.0,-48.08,127.6,-47.91,161.9,-47.81
2018-01-26 20:00:00,337.4,-48.71,224.3,-48.16,133.4,-47.94,158.8,-47.8
2018-01-26 21:00:00,390.5,-48.88,228.0,-48.15,142.1,-47.94,167.9,-47.66
2018-01-26 22:00:00,444.2,-49.02,246.2,-48.14,166.6,-47.9,195.2,-47.49
2018-01-26 23:00:00,509.6,-49.15,306.1,-48.18,215.5,-47.77,254.8,-47.37
2018-01-27 00:00:00,460.0,-49.01,365.4,-48.43,229.7,-47.66,290.7,-47.83
2018-01-27 01:00:00,396.6,-48.89,349.4,-48.56,237.3,-47.77,232.4,-47.96
2018-01-27 02:00:00,361.8,-48.83,287.1,-48.4,207.5,-47.79,193.5,-47.88
2018-01-27 03:00:00,356.7,-48.82,275.4,-48.37,179.3,-47.77,175.3,-47.81
2018-01-27 04:00:00,332.3,-48.75,257.7,-48.31,164.8,-47.76,165.2,-47.82
2018-01-27 05:00:00,318.4,-48.73,257.9,-48.38,163.8,-47.79,166.5,-47.89
2018-01-27 06:00:00,312.2,-48.73,265.1,-48.45,164.4,-47.85,169.9,-47.96
2018-01-27 07:00:00,275.1,-48.63,256.7,-48.49,149.8,-47.89,166.5,-48.01
2018-01-27 08:00:00,234.7,-48.5,228.5,-48.43,131.4,-47.88,145.6,-48.01
2018-01-27 09:00:00,180.3,-48.31,184.9,-48.31,101.8,-47.81,111.4,-47.98
2018-01-27 10:00:00,129.9,-48.12,141.4,-48.18,76.3,-47.76,79.7,-47.93
2018-01-27 11:00:00,88.4,-47.96,93.7,-48.01,56.8,-47.74,59.3,-47.9
2018-01-27 12:00:00,69.6,-47.89,64.7,-47.89,46.1,-47.73,48.1,-47.88
2018-01-27 13:00:00,70.1,-47.91,55.6,-47.85,46.9,-47.75,43.8,-47.92
2018-01-27 14:00:00,71.6,-47.92,50.6,-47.82,47.9,-47.75,40.2,-47.9
2018-01-27 15:00:00,80.1,-47.96,53.3,-47.83,52.4,-47.76,41.6,-47.88
2018-01-27 16:00:00,84.9,-47.96,55.0,-47.82,53.6,-47.74,42.9,-47.84
2018-01-27 17:00:00,86.3,-47.94,54.2,-47.77,50.3,-47.68,39.5,-47.73
2018-01-27 18:00:00,81.4,-47.89,48.4,-47.72,46.3,-47.63,33.2,-47.65
2018-01-27 19:00:00,74.8,-47.86,46.2,-47.71,49.5,-47.64,36.0,-47.67
2018-01-27 20:00:00,78.6,-47.89,59.5,-47.79,65.7,-47.72,45.0,-47.73
2018-01-27 21:00:00,87.4,-47.93,66.3,-47.81,75.1,-47.75,52.6,-47.75
2018-01-27 22:00:00,78.2,-47.88,61.3,-47.78,62.4,-47.68,53.4,-47.74
2018-01-27 23:00:00,80.9,-47.88,63.4,-47.77,61.4,-47.66,49.6,-47.7
2018-01-28 00:00:00,92.0,-47.91,70.4,-47.78,71.0,-47.66,45.8,-47.64
2018-01-28 01:00:00,89.3,-47.91,68.8,-47.78,72.7,-47.68,43.8,-47.64
2018-01-28 02:00:00,95.2,-47.93,70.4,-47.78,73.9,-47.68,46.1,-47.63
2018-01-28 03:00:00,116.9,-48.0,85.9,-47.81,85.8,-47.67,56.5,-47.61
2018-01-28 04:00:00,108.5,-47.97,87.2,-47.83,83.4,-47.67,59.4,-47.66
2018-01-28 05:00:00,94.1,-47.92,78.1,-47.82,73.7,-47.68,65.0,-47.73
2018-01-28 06:00:00,95.0,-47.93,78.0,-47.81,69.9,-47.66,71.7,-47.75
2018-01-28 07:00:00,92.8,-47.93,74.4,-47.82,74.0,-47.69,55.8,-47.73
2018-01-28 08:00:00,82.1,-47.9,68.4,-47.82,70.9,-47.72,53.7,-47.76
2018-01-28 09:00:00,68.0,-47.84,57.6,-47.78,58.6,-47.69,47.2,-47.74
2018-01-28 10:00:00,57.1,-47.8,47.4,-47.76,52.4,-47.7,39.8,-47.75
2018-01-28 11:00:00,46.3,-47.75,38.2,-47.72,41.6,-47.66,32.7,-47.71
2018-01-28 12:00:00,37.6,-47.72,30.9,-47.69,31.9,-47.64,28.3,-47.7
2018-01-28 13:00:00,36.1,-47.71,31.0,-47.69,30.7,-47.64,30.7,-47.72
2018-01-28 14:00:00,40.5,-47.73,35.2,-47.7,32.3,-47.64,40.0,-47.76
2018-01-28 15:00:00,40.2,-47.72,33.8,-47.68,31.0,-47.62,39.3,-47.73
2018-01-28 16:00:00,39.0,-47.71,34.5,-47.68,30.2,-47.62,40.7,-47.73
2018-01-28 17:00:00,43.9,-47.73,38.1,-47.69,34.3,-47.63,44.9,-47.75
2018-01-28 18:00:00,49.9,-47.76,42.3,-47.71,41.6,-47.64,39.4,-47.73
2018-01-28 19:00:00,48.8,-47.77,41.5,-47.73,42.7,-47.67,35.9,-47.73
2018-01-28 20:00:00,53.0,-47.79,49.6,-47.78,51.8,-47.71,46.1,-47.81
2018-01-28 21:00:00,34.1,-47.7,32.7,-47.7,29.3,-47.63,29.5,-47.72
2018-01-28 22:00:00,33.6,-47.7,32.4,-47.71,28.0,-47.63,31.0,-47.73
2018-01-28 23:00:00,35.6,-47.71,32.2,-47.7,29.4,-47.63,28.5,-47.7
2018-01-29 00:00:00,34.2,-47.7,30.7,-47.7,30.7,-47.65,27.2,-47.71
2018-01-29 01:00:00,31.2,-47.69,28.3,-47.69,27.3,-47.63,28.9,-47.72
2018-01-29 02:00:00,29.6,-47.68,28.2,-47.69,26.0,-47.63,25.5,-47.7
2018-01-29 03:00:00,27.2,-47.67,26.4,-47.67,24.9,-47.63,23.2,-47.68
2018-01-29 04:00:00,32.4,-47.69,30.1,-47.69,30.2,-47.64,26.2,-47.69
2018-01-29 05:00:00,31.9,-47.68,26.4,-47.66,27.6,-47.62,24.1,-47.66
2018-01-29 06:00:00,31.4,-47.68,27.0,-47.66,26.4,-47.61,25.5,-47.67
2018-01-29 07:00:00,36.9,-47.7,34.3,-47.7,31.2,-47.63,31.7,-47.71
2018-01-29 08:00:00,41.7,-47.72,38.2,-47.72,34.1,-47.64,35.6,-47.73
2018-01-29 09:00:00,37.1,-47.71,33.7,-47.7,30.6,-47.63,32.5,-47.73
2018-01-29 10:00:00,34.3,-47.7,32.8,-47.71,30.8,-47.65,30.1,-47.73
2018-01-29 11:00:00,35.2,-47.71,33.4,-47.71,32.5,-47.66,29.4,-47.73
2018-01-29 12:00:00,36.8,-47.71,32.6,-47.7,33.9,-47.66,27.9,-47.72
2018-01-29 13:00:00,36.7,-47.71,31.7,-47.69,34.5,-47.66,27.6,-47.71
2018-01-29 14:00:00,43.0,-47.73,36.2,-47.7,35.3,-47.65,37.0,-47.74
2018-01-29 15:00:00,67.0,-47.83,50.9,-47.74,40.7,-47.63,43.9,-47.7
2018-01-29 16:00:00,78.3,-47.87,64.8,-47.79,38.4,-47.65,42.7,-47.65
2018-01-29 17:00:00,86.2,-47.9,67.0,-47.78,39.7,-47.65,46.8,-47.63
2018-01-29 18:00:00,99.0,-47.95,69.5,-47.77,46.6,-47.66,56.8,-47.64
2018-01-29 19:00:00,106.1,-47.99,69.6,-47.78,49.3,-47.68,64.1,-47.67
2018-01-29 20:00:00,151.0,-48.15,85.4,-47.79,64.4,-47.71,80.1,-47.6
2018-01-29 21:00:00,196.1,-48.29,101.9,-47.81,79.7,-47.71,101.4,-47.52
2018-01-29 22:00:00,207.4,-48.34,114.9,-47.87,83.1,-47.73,105.2,-47.55
2018-01-29 23:00:00,278.2,-48.58,155.3,-47.96,108.5,-47.77,132.7,-47.47
2018-01-30 00:00:00,361.9,-48.81,227.3,-48.09,149.6,-47.67,172.9,-47.34
2018-01-30 01:00:00,404.5,-48.9,291.9,-48.27,187.5,-47.56,223.3,-47.51
2018-01-30 02:00:00,437.0,-48.99,326.5,-48.37,205.2,-47.58,259.3,-47.56
2018-01-30 03:00:00,427.7,-48.96,349.2,-48.46,215.3,-47.6,278.9,-47.64
2018-01-30 04:00:00,324.0,-48.68,312.8,-48.5,193.4,-47.72,237.3,-47.86
2018-01-30 05:00:00,275.6,-48.55,265.2,-48.39,169.1,-47.75,183.8,-47.81
2018-01-30 06:00:00,308.0,-48.65,260.2,-48.31,179.4,-47.73,176.8,-47.61
2018-01-30 07:00:00,327.5,-48.7,261.2,-48.27,189.8,-47.7,186.5,-47.56
2018-01-30 08:00:00,329.2,-48.7,256.3,-48.25,194.4,-47.66,180.9,-47.59
2018-01-30 09:00:00,342.7,-48.76,238.7,-48.21,191.1,-47.67,170.6,-47.61
2018-01-30 10:00:00,347.9,-48.8,242.5,-48.25,176.2,-47.62,154.8,-47.64
2018-01-30 11:00:00,293.6,-48.66,232.7,-48.3,142.4,-47.64,136.2,-47.7
2018-01-30 12:00:00,186.7,-48.3,152.6,-48.11,88.1,-47.66,92.5,-47.71
2018-01-30 13:00:00,86.3,-47.91,85.0,-47.9,44.3,-47.64,53.3,-47.7
2018-01-30 14:00:00,79.7,-47.89,78.9,-47.87,43.0,-47.63,51.6,-47.71
2018-01-30 15:00:00,78.1,-47.88,77.1,-47.86,40.5,-47.64,47.7,-47.68
2018-01-30 16:00:00,117.5,-48.03,101.3,-47.93,59.8,-47.66,64.4,-47.67
2018-01-30 17:00:00,168.6,-48.21,138.5,-48.03,88.3,-47.65,86.2,-47.66
2018-01-30 18:00:00,228.6,-48.41,168.1,-48.07,124.6,-47.65,113.8,-47.63
2018-01-30 19:00:00,256.8,-48.53,182.0,-48.16,130.9,-47.67,114.0,-47.69
2018-01-30 20:00:00,174.7,-48.27,147.6,-48.13,92.0,-47.72,87.8,-47.78
2018-01-30 21:00:00,127.7,-48.07,114.2,-47.99,67.9,-47.67,65.5,-47.72
2018-01-30 22:00:00,86.3,-47.9,57.1,-47.74,47.0,-47.62,37.7,-47.64
2018-01-30 23:00:00,62.3,-47.79,33.8,-47.64,36.1,-47.58,25.0,-47.61
2018-01-31 00:00:00,58.4,-47.77,35.0,-47.65,36.9,-47.59,28.4,-47.62
2018-01-31 01:00:00,54.0,-47.75,35.3,-47.66,37.2,-47.6,26.9,-47.64
2018-01-31 02:00:00,48.0,-47.74,32.5,-47.66,36.8,-47.62,27.4,-47.66
2018-01-31 03:00:00,57.1,-47.78,42.4,-47.71,48.3,-47.67,33.3,-47.68
2018-01-31 04:00:00,63.8,-47.81,47.1,-47.73,53.5,-47.67,38.0,-47.69
2018-01-31 05:00:00,53.1,-47.77,36.1,-47.69,43.1,-47.65,34.8,-47.7
2018-01-31 06:00:00,50.3,-47.76,33.6,-47.68,36.7,-47.64,32.7,-47.7
2018-01-31 07:00:00,41.9,-47.72,31.2,-47.67,30.9,-47.62,29.7,-47.69
2018-01-31 08:00:00,40.0,-47.72,32.4,-47.68,36.0,-47.65,26.7,-47.68
2018-01-31 09:00:00,44.1,-47.73,34.0,-47.68,38.5,-47.65,27.5,-47.68
2018-01-31 10:00:00,42.6,-47.73,34.7,-47.69,34.5,-47.64,37.2,-47.74
2018-01-31 11:00:00,48.9,-47.76,42.4,-47.72,32.0,-47.63,38.3,-47.71
2018-01-31 12:00:00,43.6,-47.73,41.8,-47.72,27.7,-47.6,37.3,-47.68
2018-01-31 13:00:00,40.9,-47.72,42.7,-47.73,31.5,-47.63,40.6,-47.73
2018-01-31 14:00:00,35.7,-47.7,36.0,-47.7,28.4,-47.63,35.7,-47.71
2018-01-31 15:00:00,37.4,-47.7,37.4,-47.71,27.0,-47.62,36.4,-47.69
2018-01-31 16:00:00,43.5,-47.72,44.0,-47.73,31.5,-47.62,41.8,-47.69
2018-01-31 17:00:00,47.3,-47.74,45.0,-47.72,34.9,-47.63,40.9,-47.69
2018-01-31 18:00:00,61.4,-47.79,52.2,-47.74,46.3,-47.64,49.1,-47.7
2018-01-31 19:00:00,66.7,-47.81,54.1,-47.74,52.4,-47.65,38.3,-47.64
2018-01-31 20:00:00,71.2,-47.83,58.2,-47.75,59.7,-47.67,41.4,-47.65
2018-01-31 21:00:00,81.6,-47.87,63.8,-47.77,68.7,-47.69,42.3,-47.64
2018-01-31 22:00:00,86.5,-47.9,59.5,-47.75,70.5,-47.69,44.1,-47.67
2018-01-31 23:00:00,77.4,-47.88,48.0,-47.73,62.1,-47.69,45.8,-47.75
2018-02-01 00:00:00,67.2,-47.84,46.2,-47.74,54.3,-47.68,47.4,-47.74
2018-02-01 01:00:00,64.2,-47.82,50.3,-47.75,55.5,-47.69,40.4,-47.7
2018-02-01 02:00:00,64.4,-47.81,51.6,-47.75,55.4,-47.68,39.9,-47.69
2018-02-01 03:00:00,65.9,-47.83,59.9,-47.79,54.0,-47.7,59.9,-47.79
2018-02-01 04:00:00,89.2,-47.92,82.7,-47.88,64.7,-47.71,82.9,-47.84
2018-02-01 05:00:00,107.6,-48.0,74.9,-47.84,66.4,-47.71,70.3,-47.78
2018-02-01 06:00:00,134.3,-48.11,96.5,-47.92,73.3,-47.72,79.4,-47.76
2018-02-01 07:00:00,130.1,-48.08,92.8,-47.89,69.5,-47.67,71.5,-47.73
2018-02-01 08:00:00,109.3,-48.01,74.4,-47.85,65.8,-47.69,63.1,-47.76
2018-02-01 09:00:00,77.7,-47.89,59.9,-47.83,50.8,-47.69,52.7,-47.79
2018-02-01 10:00:00,65.2,-47.83,58.7,-47.84,41.1,-47.68,43.4,-47.77
2018-02-01 11:00:00,64.5,-47.83,58.3,-47.83,41.0,-47.68,40.4,-47.77
2018-02-01 12:00:00,55.5,-47.78,48.2,-47.76,35.3,-47.65,32.6,-47.71
2018-02-01 13:00:00,52.8,-47.76,44.8,-47.74,33.3,-47.63,30.6,-47.7
2018-02-01 14:00:00,51.1,-47.76,40.2,-47.72,31.9,-47.63,31.7,-47.7
2018-02-01 15:00:00,54.8,-47.77,44.2,-47.73,32.6,-47.63,30.7,-47.67
2018-02-01 16:00:00,61.6,-47.8,42.9,-47.72,36.4,-47.63,32.9,-47.68
2018-02-01 17:00:00,74.9,-47.86,57.4,-47.78,41.1,-47.66,34.8,-47.69
2018-02-01 18:00:00,68.8,-47.82,45.8,-47.73,43.3,-47.68,32.2,-47.72
2018-02-01 19:00:00,57.4,-47.78,36.3,-47.7,39.7,-47.68,31.8,-47.75
2018-02-01 20:00:00,78.2,-47.86,54.2,-47.75,48.6,-47.71,41.0,-47.75
2018-02-01 21:00:00,115.1,-48.0,86.1,-47.84,61.6,-47.72,53.0,-47.71
2018-02-01 22:00:00,109.2,-47.98,82.8,-47.84,58.5,-47.72,50.6,-47.72
2018-02-01 23:00:00,109.3,-47.97,81.2,-47.83,59.5,-47.72,53.5,-47.7
2018-02-02 00:00:00,114.9,-47.99,84.3,-47.82,62.0,-47.72,56.2,-47.7
2018-02-02 01:00:00,124.9,-48.04,96.0,-47.87,64.3,-47.72,60.0,-47.7
2018-02-02 02:00:00,125.5,-48.04,98.2,-47.9,64.6,-47.72,57.9,-47.71
2018-02-02 03:00:00,133.3,-48.08,109.2,-47.96,69.2,-47.72,64.0,-47.73
2018-02-02 04:00:00,131.9,-48.08,109.1,-47.97,70.0,-47.73,64.9,-47.75
2018-02-02 05:00:00,133.3,-48.09,108.7,-47.98,71.1,-47.74,64.9,-47.77
2018-02-02 06:00:00,128.9,-48.07,107.5,-47.97,70.6,-47.76,64.8,-47.79
2018-02-02 07:00:00,131.8,-48.08,117.2,-48.02,71.8,-47.76,67.5,-47.81
2018-02-02 08:00:00,126.4,-48.07,120.8,-48.05,71.0,-47.77,71.9,-47.86
2018-02-02 09:00:00,116.0,-48.03,115.4,-48.05,68.6,-47.78,73.8,-47.92
2018-02-02 10:00:00,94.4,-47.94,94.2,-47.98,63.5,-47.78,76.2,-47.98
2018-02-02 11:00:00,86.1,-47.9,84.9,-47.96,62.1,-47.77,73.5,-47.98
2018-02-02 12:00:00,76.6,-47.86,76.9,-47.91,57.9,-47.74,66.8,-47.94
2018-02-02 13:00:00,76.8,-47.85,78.8,-47.9,59.1,-47.73,67.8,-47.92
2018-02-02 14:00:00,80.5,-47.84,75.7,-47.86,58.9,-47.71,65.2,-47.89
2018-02-02 15:00:00,87.7,-47.86,78.4,-47.84,60.5,-47.71,66.6,-47.86
2018-02-02 16:00:00,103.7,-47.92,85.0,-47.83,65.1,-47.71,71.8,-47.82
2018-02-02 17:00:00,154.6,-48.1,101.5,-47.85,83.8,-47.74,90.0,-47.75
2018-02-02 18:00:00,204.0,-48.27,122.3,-47.9,103.0,-47.76,119.3,-47.68
2018-02-02 19:00:00,262.4,-48.47,146.8,-47.94,126.5,-47.78,153.3,-47.61
2018-02-02 20:00:00,322.5,-48.66,175.0,-48.01,147.7,-47.82,179.0,-47.59
2018-02-02 21:00:00,351.0,-48.75,189.7,-48.04,156.9,-47.84,188.8,-47.58
2018-02-02 22:00:00,370.4,-48.8,203.5,-48.06,169.4,-47.82,196.2,-47.55
2018-02-02 23:00:00,421.5,-48.9,277.8,-48.22,214.3,-47.64,269.1,-47.63
2018-02-03 00:00:00,435.1,-48.97,355.2,-48.58,246.8,-47.74,329.7,-48.0
2018-02-03 01:00:00,457.6,-49.07,378.5,-48.68,258.6,-47.84,328.5,-48.01
2018-02-03 02:00:00,426.9,-48.97,367.6,-48.64,253.3,-47.8,296.0,-47.97
2018-02-03 03:00:00,314.0,-48.62,308.8,-48.53,219.8,-47.79,237.6,-48.08
2018-02-03 04:00:00,252.1,-48.44,254.7,-48.4,197.5,-47.83,191.5,-48.05
2018-02-03 05:00:00,150.2,-48.15,150.3,-48.16,144.0,-47.92,121.7,-48.06
2018-02-03 06:00:00,88.6,-47.94,85.2,-47.96,78.0,-47.82,88.2,-48.03
2018-02-03 07:00:00,111.9,-48.03,106.5,-48.04,88.2,-47.83,106.8,-48.05
2018-02-03 08:00:00,127.0,-48.07,114.1,-48.03,93.6,-47.8,113.9,-48.0
2018-02-03 09:00:00,120.1,-48.03,108.0,-47.98,84.2,-47.74,100.3,-47.9
2018-02-03 10:00:00,131.9,-48.07,106.4,-47.94,84.1,-47.72,90.0,-47.81
2018-02-03 11:00:00,130.9,-48.06,99.0,-47.91,79.8,-47.71,82.1,-47.79
2018-02-03 12:00:00,110.7,-47.99,86.6,-47.88,69.9,-47.7,64.0,-47.77
2018-02-03 13:00:00,120.8,-48.03,86.0,-47.86,72.3,-47.7,63.4,-47.74
2018-02-03 14:00:00,135.1,-48.09,99.1,-47.91,77.4,-47.7,66.0,-47.72
2018-02-03 15:00:00,155.9,-48.16,162.2,-48.16,82.2,-47.72,75.6,-47.71
2018-02-03 16:00:00,176.5,-48.23,184.9,-48.26,81.4,-47.74,90.3,-47.74
2018-02-03 17:00:00,183.9,-48.27,177.5,-48.28,74.8,-47.77,95.7,-47.84
2018-02-03 18:00:00,170.5,-48.22,191.4,-48.35,73.0,-47.77,82.1,-47.85
2018-02-03 19:00:00,164.6,-48.22,200.0,-48.4,74.6,-47.78,77.4,-47.86
2018-02-03 20:00:00,158.9,-48.2,176.7,-48.31,67.8,-47.77,67.8,-47.82
2018-02-03 21:00:00,150.3,-48.16,128.2,-48.1,65.1,-47.76,68.9,-47.79
2018-02-03 22:00:00,159.5,-48.23,149.0,-48.22,81.6,-47.85,83.5,-47.95
2018-02-03 23:00:00,135.9,-48.1,135.2,-48.12,75.6,-47.82,81.5,-47.96
2018-02-04 00:00:00,122.1,-48.0,119.8,-48.02,66.2,-47.75,71.4,-47.86
2018-02-04 01:00:00,113.5,-47.97,112.3,-47.98,59.4,-47.72,62.1,-47.82
2018-02-04 02:00:00,104.7,-47.95,101.7,-47.94,54.8,-47.72,52.8,-47.78
2018-02-04 03:00:00,100.3,-47.93,94.7,-47.91,48.2,-47.69,49.6,-47.73
2018-02-04 04:00:00,101.2,-47.93,95.5,-47.91,44.3,-47.67,48.1,-47.71
2018-02-04 05:00:00,85.8,-47.87,84.4,-47.87,42.5,-47.67,41.5,-47.71
2018-02-04 06:00:00,108.3,-47.97,92.5,-47.89,49.8,-47.69,49.0,-47.71
2018-02-04 07:00:00,137.0,-48.08,109.8,-47.96,57.4,-47.71,53.7,-47.68
2018-02-04 08:00:00,120.3,-48.02,97.4,-47.92,52.1,-47.7,48.8,-47.69
2018-02-04 09:00:00,103.6,-47.95,87.0,-47.88,46.4,-47.68,42.5,-47.69
2018-02-04 10:00:00,79.3,-47.85,74.0,-47.84,38.0,-47.66,37.6,-47.71
2018-02-04 11:00:00,62.2,-47.78,58.4,-47.77,35.6,-47.65,32.3,-47.72
2018-02-04 12:00:00,63.7,-47.79,56.8,-47.76,37.6,-47.66,34.0,-47.73
2018-02-04 13:00:00,66.3,-47.79,55.0,-47.75,39.4,-47.66,33.5,-47.73
2018-02-04 14:00:00,69.3,-47.8,66.1,-47.79,40.2,-47.67,36.4,-47.73
2018-02-04 15:00:00,76.2,-47.82,77.6,-47.83,41.5,-47.67,40.2,-47.73
2018-02-04 16:00:00,81.7,-47.84,68.5,-47.79,42.1,-47.67,40.4,-47.73
2018-02-04 17:00:00,93.5,-47.89,84.2,-47.85,44.8,-47.67,44.4,-47.72
2018-02-04 18:00:00,104.4,-47.93,99.5,-47.91,49.5,-47.69,50.6,-47.72
2018-02-04 19:00:00,109.6,-47.95,98.9,-47.91,50.3,-47.68,48.8,-47.7
2018-02-04 20:00:00,114.0,-47.97,98.7,-47.9,51.8,-47.69,51.2,-47.69
2018-02-04 21:00:00,130.1,-48.03,94.2,-47.86,55.3,-47.7,54.2,-47.66
2018-02-04 22:00:00,144.3,-48.08,109.2,-47.92,59.1,-47.7,61.0,-47.66
2018-02-04 23:00:00,135.7,-48.05,107.1,-47.92,54.7,-47.69,57.4,-47.66
2018-02-05 00:00:00,128.1,-48.02,119.2,-47.97,50.4,-47.68,57.7,-47.65
2018-02-05 01:00:00,131.5,-48.03,125.7,-48.0,50.2,-47.67,57.3,-47.64
2018-02-05 02:00:00,139.8,-48.07,144.2,-48.08,52.2,-47.68,60.8,-47.64
2018-02-05 03:00:00,156.0,-48.13,156.3,-48.12,58.0,-47.69,66.2,-47.63
2018-02-05 04:00:00,155.2,-48.14,152.7,-48.11,58.7,-47.7,67.0,-47.66
2018-02-05 05:00:00,148.8,-48.12,160.3,-48.16,59.3,-47.71,69.3,-47.7
2018-02-05 06:00:00,135.7,-48.07,146.7,-48.11,58.7,-47.71,68.5,-47.73
2018-02-05 07:00:00,138.7,-48.08,153.3,-48.14,61.0,-47.72,74.1,-47.77
2018-02-05 08:00:00,132.9,-48.05,146.6,-48.11,60.0,-47.71,67.8,-47.76
2018-02-05 09:00:00,103.7,-47.93,120.9,-48.01,55.3,-47.7,53.3,-47.73
2018-02-05 10:00:00,106.0,-47.93,123.9,-48.01,60.3,-47.72,59.0,-47.76
2018-02-05 11:00:00,105.7,-47.92,119.8,-47.98,65.7,-47.74,62.7,-47.78
2018-02-05 12:00:00,95.3,-47.88,100.0,-47.91,63.7,-47.74,60.1,-47.79
2018-02-05 13:00:00,104.0,-47.91,113.1,-47.95,72.5,-47.77,68.7,-47.81
2018-02-05 14:00:00,104.0,-47.91,114.8,-47.96,74.5,-47.77,69.7,-47.81
2018-02-05 15:00:00,102.1,-47.91,125.8,-48.02,76.3,-47.77,69.2,-47.81
2018-02-05 16:00:00,145.3,-48.06,180.5,-48.2,86.4,-47.79,84.6,-47.78
2018-02-05 17:00:00,146.6,-48.06,173.7,-48.16,86.9,-47.79,85.3,-47.78
2018-02-05 18:00:00,148.0,-48.06,184.1,-48.19,89.3,-47.8,92.0,-47.79
2018-02-05 19:00:00,197.4,-48.22,256.6,-48.43,105.4,-47.84,109.8,-47.76
2018-02-05 20:00:00,221.5,-48.29,257.2,-48.41,113.3,-47.86,120.8,-47.77
2018-02-05 21:00:00,221.5,-48.29,227.9,-48.32,112.0,-47.86,118.4,-47.79
2018-02-05 22:00:00,234.9,-48.34,244.1,-48.4,113.3,-47.86,122.9,-47.82
2018-02-05 23:00:00,224.3,-48.33,202.3,-48.26,110.3,-47.86,123.1,-47.86
2018-02-06 00:00:00,232.8,-48.36,176.0,-48.14,114.1,-47.87,126.1,-47.83
2018-02-06 01:00:00,226.1,-48.34,141.9,-47.99,111.8,-47.87,113.9,-47.79
2018-02-06 02:00:00,240.8,-48.37,181.9,-48.13,117.8,-47.87,120.3,-47.78
2018-02-06 03:00:00,228.1,-48.32,196.7,-48.18,115.9,-47.86,123.7,-47.77
2018-02-06 04:00:00,234.6,-48.33,174.5,-48.08,116.2,-47.85,120.5,-47.74
2018-02-06 05:00:00,238.2,-48.36,175.5,-48.11,116.3,-47.86,121.5,-47.77
2018-02-06 06:00:00,226.6,-48.34,156.4,-48.07,111.5,-47.86,111.7,-47.79
2018-02-06 07:00:00,235.7,-48.38,175.0,-48.14,112.3,-47.86,113.1,-47.78
2018-02-06 08:00:00,218.5,-48.34,150.6,-48.08,103.9,-47.84,99.6,-47.78
2018-02-06 09:00:00,167.4,-48.18,114.2,-47.95,85.2,-47.8,80.9,-47.79
2018-02-06 10:00:00,149.8,-48.11,95.3,-47.9,80.1,-47.78,71.2,-47.81
2018-02-06 11:00:00,112.9,-47.98,76.9,-47.84,66.4,-47.75,56.5,-47.79
2018-02-06 12:00:00,81.3,-47.87,57.1,-47.76,52.4,-47.71,44.6,-47.74
2018-02-06 13:00:00,70.4,-47.82,49.5,-47.73,46.3,-47.68,39.5,-47.71
2018-02-06 14:00:00,72.2,-47.82,51.5,-47.73,48.0,-47.69,41.7,-47.71
2018-02-06 15:00:00,73.4,-47.82,48.6,-47.71,46.3,-47.68,38.5,-47.69
2018-02-06 16:00:00,81.3,-47.85,50.4,-47.7,45.6,-47.67,39.8,-47.67
2018-02-06 17:00:00,100.5,-47.9,59.5,-47.72,49.1,-47.67,43.7,-47.66
2018-02-06 18:00:00,134.6,-48.03,77.1,-47.75,55.6,-47.68,55.5,-47.65
2018-02-06 19:00:00,187.9,-48.21,102.4,-47.81,70.9,-47.72,72.6,-47.65
2018-02-06 20:00:00,239.1,-48.36,145.1,-47.88,90.1,-47.76,95.4,-47.66
2018-02-06 21:00:00,300.8,-48.53,181.7,-47.92,113.3,-47.82,122.8,-47.65
2018-02-06 22:00:00,265.5,-48.41,184.8,-47.95,118.0,-47.85,133.0,-47.74
2018-02-06 23:00:00,197.0,-48.28,177.8,-48.14,118.5,-47.91,139.5,-47.97
2018-02-07 00:00:00,155.6,-48.13,135.0,-48.03,85.9,-47.81,102.7,-47.9
2018-02-07 01:00:00,124.0,-47.99,93.2,-47.83,52.4,-47.69,65.3,-47.71
2018-02-07 02:00:00,119.4,-47.98,104.4,-47.86,57.6,-47.72,77.9,-47.73
2018-02-07 03:00:00,118.2,-48.01,96.9,-47.92,63.3,-47.75,87.5,-47.82
2018-02-07 04:00:00,114.4,-48.01,93.3,-47.92,62.1,-47.75,83.9,-47.83
2018-02-07 05:00:00,118.4,-48.0,89.6,-47.85,54.8,-47.71,73.3,-47.77
2018-02-07 06:00:00,138.3,-48.06,106.4,-47.89,61.0,-47.72,82.2,-47.77
2018-02-07 07:00:00,150.7,-48.08,119.6,-47.91,64.6,-47.74,85.1,-47.76
2018-02-07 08:00:00,142.3,-48.03,114.4,-47.88,57.1,-47.71,77.1,-47.76
2018-02-07 09:00:00,126.0,-47.96,101.5,-47.84,49.3,-47.68,66.4,-47.74
2018-02-07 10:00:00,109.0,-47.9,94.4,-47.83,41.9,-47.66,57.0,-47.73
2018-02-07 11:00:00,103.0,-47.89,94.2,-47.83,39.3,-47.65,55.0,-47.74
2018-02-07 12:00:00,94.8,-47.85,86.3,-47.8,35.9,-47.64,51.0,-47.73
2018-02-07 13:00:00,79.4,-47.8,71.7,-47.75,29.3,-47.62,41.9,-47.69
2018-02-07 14:00:00,60.0,-47.74,56.8,-47.69,22.9,-47.59,33.9,-47.65
2018-02-07 15:00:00,52.9,-47.71,46.9,-47.66,20.7,-47.58,29.2,-47.62
2018-02-07 16:00:00,72.0,-47.79,57.7,-47.68,28.6,-47.6,38.9,-47.62
2018-02-07 17:00:00,127.6,-48.0,80.0,-47.72,49.6,-47.65,64.5,-47.56
2018-02-07 18:00:00,178.4,-48.18,101.0,-47.76,73.0,-47.67,98.6,-47.47
2018-02-07 19:00:00,225.9,-48.35,122.3,-47.84,94.1,-47.71,129.1,-47.49
2018-02-07 20:00:00,273.6,-48.52,144.3,-47.91,112.1,-47.76,146.5,-47.46
2018-02-07 21:00:00,315.5,-48.64,170.0,-47.95,130.3,-47.74,168.8,-47.37
2018-02-07 22:00:00,353.8,-48.73,204.3,-47.98,152.5,-47.65,189.7,-47.31
2018-02-07 23:00:00,399.3,-48.81,286.6,-48.2,198.0,-47.5,243.5,-47.51
2018-02-08 00:00:00,403.0,-48.84,352.4,-48.5,229.9,-47.61,245.2,-47.71
2018-02-08 01:00:00,376.4,-48.81,308.9,-48.41,222.5,-47.72,200.4,-47.63
2018-02-08 02:00:00,357.4,-48.77,277.4,-48.31,215.0,-47.72,201.4,-47.65
2018-02-08 03:00:00,338.2,-48.72,249.4,-48.21,206.6,-47.73,192.6,-47.62
2018-02-08 04:00:00,315.5,-48.66,207.7,-48.07,192.8,-47.71,161.0,-47.51
2018-02-08 05:00:00,300.8,-48.62,189.2,-48.03,171.4,-47.66,137.8,-47.49
2018-02-08 06:00:00,309.1,-48.65,192.2,-48.05,160.2,-47.6,132.0,-47.46
2018-02-08 07:00:00,340.8,-48.74,212.2,-48.1,167.9,-47.55,141.5,-47.41
2018-02-08 08:00:00,357.1,-48.8,226.2,-48.15,168.9,-47.55,145.7,-47.44
2018-02-08 09:00:00,305.3,-48.65,211.1,-48.16,146.6,-47.55,132.5,-47.55
2018-02-08 10:00:00,192.6,-48.29,149.4,-48.05,97.1,-47.6,89.0,-47.64
2018-02-08 11:00:00,147.8,-48.13,122.5,-47.99,75.2,-47.63,74.4,-47.66
2018-02-08 12:00:00,125.4,-48.04,111.2,-47.95,64.3,-47.62,65.1,-47.66
2018-02-08 13:00:00,109.6,-47.98,95.6,-47.9,57.9,-47.62,55.3,-47.65
2018-02-08 14:00:00,94.6,-47.91,66.1,-47.76,50.0,-47.6,44.8,-47.61
2018-02-08 15:00:00,82.8,-47.86,53.2,-47.71,42.3,-47.57,37.5,-47.6
2018-02-08 16:00:00,82.7,-47.88,50.8,-47.72,42.6,-47.61,38.1,-47.63
2018-02-08 17:00:00,78.8,-47.86,55.9,-47.75,39.3,-47.61,35.8,-47.62
2018-02-08 18:00:00,83.1,-47.88,62.4,-47.77,43.0,-47.62,38.1,-47.64
2018-02-08 19:00:00,90.5,-47.93,69.1,-47.81,49.0,-47.66,41.7,-47.68
2018-02-08 20:00:00,81.3,-47.9,65.8,-47.82,45.8,-47.66,39.8,-47.7
2018-02-08 21:00:00,76.6,-47.89,62.4,-47.82,44.3,-47.68,42.6,-47.73
2018-02-08 22:00:00,74.0,-47.89,65.6,-47.85,45.6,-47.7,43.3,-47.75
2018-02-08 23:00:00,75.8,-47.9,67.8,-47.87,47.2,-47.72,45.4,-47.78
2018-02-09 00:00:00,71.2,-47.88,63.3,-47.85,44.0,-47.71,47.0,-47.79
2018-02-09 01:00:00,58.5,-47.81,55.4,-47.81,37.1,-47.67,36.6,-47.73
2018-02-09 02:00:00,56.2,-47.8,49.9,-47.78,35.8,-47.66,31.0,-47.7
2018-02-09 03:00:00,55.3,-47.8,47.0,-47.76,34.9,-47.66,27.0,-47.69
2018-02-09 04:00:00,59.3,-47.82,52.5,-47.79,37.8,-47.67,29.2,-47.72
2018-02-09 05:00:00,67.2,-47.84,48.0,-47.75,40.4,-47.65,29.4,-47.68
2018-02-09 06:00:00,68.7,-47.81,49.0,-47.7,47.8,-47.61,38.9,-47.62
2018-02-09 07:00:00,59.2,-47.78,54.1,-47.75,43.9,-47.65,55.8,-47.75
2018-02-09 08:00:00,58.0,-47.77,38.8,-47.68,33.9,-47.6,35.5,-47.64
2018-02-09 09:00:00,54.8,-47.76,35.9,-47.67,32.3,-47.59,33.6,-47.63
2018-02-09 10:00:00,44.9,-47.72,29.5,-47.65,26.3,-47.59,27.1,-47.61
2018-02-09 11:00:00,40.2,-47.7,28.3,-47.65,23.8,-47.59,26.0,-47.61
2018-02-09 12:00:00,42.3,-47.71,33.7,-47.67,22.6,-47.59,25.5,-47.61
2018-02-09 13:00:00,44.1,-47.71,36.1,-47.67,20.8,-47.57,22.5,-47.57
2018-02-09 14:00:00,44.9,-47.71,36.6,-47.67,21.6,-47.57,23.9,-47.57
2018-02-09 15:00:00,37.5,-47.67,30.1,-47.63,18.4,-47.56,21.3,-47.56
2018-02-09 16:00:00,44.2,-47.7,34.9,-47.63,20.8,-47.56,23.4,-47.55
2018-02-09 17:00:00,72.5,-47.82,50.1,-47.69,31.9,-47.57,35.4,-47.54
2018-02-09 18:00:00,86.3,-47.88,58.8,-47.74,37.8,-47.59,42.8,-47.55
2018-02-09 19:00:00,93.8,-47.91,70.0,-47.79,40.0,-47.6,45.7,-47.56
2018-02-09 20:00:00,108.1,-47.97,81.3,-47.83,46.0,-47.61,51.7,-47.57
2018-02-09 21:00:00,139.0,-48.1,104.6,-47.92,63.0,-47.63,73.9,-47.62
2018-02-09 22:00:00,160.0,-48.18,119.1,-47.98,76.3,-47.67,90.2,-47.66
2018-02-09 23:00:00,178.7,-48.25,119.8,-47.95,85.7,-47.68,97.4,-47.61
2018-02-10 00:00:00,223.4,-48.37,137.4,-47.93,109.9,-47.62,122.8,-47.53
2018-02-10 01:00:00,258.6,-48.46,205.3,-48.14,149.6,-47.61,190.0,-47.7
2018-02-10 02:00:00,257.2,-48.45,217.0,-48.19,163.0,-47.66,148.4,-47.58
2018-02-10 03:00:00,281.9,-48.52,210.1,-48.11,169.3,-47.63,151.4,-47.51
2018-02-10 04:00:00,282.1,-48.51,199.0,-48.05,170.2,-47.61,144.7,-47.44
2018-02-10 05:00:00,290.2,-48.54,196.2,-48.02,177.7,-47.61,139.6,-47.41
2018-02-10 06:00:00,299.6,-48.58,169.2,-47.92,171.2,-47.61,134.4,-47.42
2018-02-10 07:00:00,303.3,-48.63,162.6,-47.94,145.9,-47.61,120.4,-47.44
2018-02-10 08:00:00,232.1,-48.43,170.6,-48.12,102.3,-47.66,104.0,-47.63
2018-02-10 09:00:00,158.5,-48.17,137.4,-48.05,75.5,-47.66,78.9,-47.68
2018-02-10 10:00:00,143.6,-48.11,109.8,-47.93,69.8,-47.65,69.3,-47.65
2018-02-10 11:00:00,109.0,-47.96,89.5,-47.84,52.3,-47.59,45.3,-47.57
2018-02-10 12:00:00,73.5,-47.81,52.9,-47.7,33.1,-47.56,25.9,-47.51
2018-02-10 13:00:00,65.8,-47.79,33.5,-47.63,30.4,-47.56,22.0,-47.52
2018-02-10 14:00:00,65.7,-47.8,39.9,-47.67,32.0,-47.58,22.6,-47.57
2018-02-10 15:00:00,59.5,-47.79,39.8,-47.68,31.5,-47.6,22.5,-47.61
2018-02-10 16:00:00,55.3,-47.77,31.4,-47.65,30.5,-47.6,20.9,-47.62
2018-02-10 17:00:00,57.3,-47.79,30.2,-47.65,32.5,-47.62,23.0,-47.63
2018-02-10 18:00:00,58.4,-47.78,28.8,-47.63,30.8,-47.59,21.5,-47.6
2018-02-10 19:00:00,59.5,-47.77,25.9,-47.59,28.9,-47.56,19.3,-47.55
2018-02-10 20:00:00,60.7,-47.76,27.0,-47.58,28.6,-47.54,19.8,-47.52
2018-02-10 21:00:00,62.4,-47.76,31.8,-47.6,30.7,-47.53,21.4,-47.52
2018-02-10 22:00:00,49.1,-47.7,23.4,-47.57,26.0,-47.52,15.8,-47.52
2018-02-10 23:00:00,45.1,-47.69,20.5,-47.56,23.9,-47.52,14.6,-47.52
2018-02-11 00:00:00,47.7,-47.7,30.0,-47.61,35.9,-47.57,24.0,-47.57
2018-02-11 01:00:00,49.3,-47.71,41.9,-47.67,38.9,-47.59,45.6,-47.66
2018-02-11 02:00:00,54.9,-47.74,41.7,-47.67,34.0,-47.57,36.8,-47.63
2018-02-11 03:00:00,65.1,-47.79,57.5,-47.75,41.3,-47.59,54.4,-47.7
2018-02-11 04:00:00,50.6,-47.73,53.0,-47.75,36.3,-47.61,48.1,-47.7
2018-02-11 05:00:00,45.3,-47.71,36.3,-47.67,28.3,-47.58,34.7,-47.65
2018-02-11 06:00:00,54.6,-47.74,44.7,-47.68,34.3,-47.58,45.0,-47.65
2018-02-11 07:00:00,50.3,-47.73,47.9,-47.71,33.4,-47.59,45.2,-47.67
2018-02-11 08:00:00,51.3,-47.73,52.5,-47.74,40.2,-47.61,44.7,-47.67
2018-02-11 09:00:00,45.9,-47.71,46.8,-47.72,34.2,-47.61,40.4,-47.67
2018-02-11 10:00:00,35.1,-47.67,38.9,-47.69,25.8,-47.59,37.6,-47.67
2018-02-11 11:00:00,27.2,-47.63,31.5,-47.66,18.8,-47.56,29.3,-47.65
2018-02-11 12:00:00,28.6,-47.64,30.6,-47.66,18.8,-47.57,25.3,-47.64
2018-02-11 13:00:00,27.9,-47.64,23.4,-47.62,16.7,-47.56,21.3,-47.61
2018-02-11 14:00:00,27.7,-47.64,20.2,-47.61,16.2,-47.56,18.7,-47.59
2018-02-11 15:00:00,27.4,-47.63,18.9,-47.59,15.5,-47.55,17.2,-47.57
2018-02-11 16:00:00,34.0,-47.66,21.4,-47.59,18.9,-47.55,20.0,-47.56
2018-02-11 17:00:00,49.8,-47.72,31.6,-47.62,27.5,-47.55,30.0,-47.57
2018-02-11 18:00:00,62.5,-47.77,41.1,-47.66,35.0,-47.56,38.4,-47.59
2018-02-11 19:00:00,67.3,-47.79,45.6,-47.68,38.8,-47.57,43.4,-47.62
2018-02-11 20:00:00,70.9,-47.81,43.7,-47.67,39.0,-47.58,41.5,-47.59
2018-02-11 21:00:00,80.0,-47.85,62.5,-47.75,47.3,-47.59,60.3,-47.66
2018-02-11 22:00:00,78.9,-47.85,75.8,-47.82,47.9,-47.6,70.0,-47.71
2018-02-11 23:00:00,91.3,-47.89,81.6,-47.83,53.8,-47.6,71.5,-47.7
2018-02-12 00:00:00,93.9,-47.9,84.7,-47.84,55.0,-47.59,77.5,-47.72
2018-02-12 01:00:00,96.4,-47.91,86.6,-47.85,56.4,-47.6,78.3,-47.71
2018-02-12 02:00:00,116.8,-47.99,113.4,-47.94,72.2,-47.62,108.8,-47.76
2018-02-12 03:00:00,153.6,-48.1,145.1,-48.02,101.1,-47.63,118.2,-47.7
2018-02-12 04:00:00,185.7,-48.2,175.7,-48.1,124.4,-47.65,147.1,-47.75
2018-02-12 05:00:00,199.5,-48.25,188.2,-48.13,130.4,-47.64,154.8,-47.75
2018-02-12 06:00:00,210.3,-48.28,189.1,-48.12,133.7,-47.63,158.7,-47.74
2018-02-12 07:00:00,225.3,-48.33,183.7,-48.08,139.9,-47.64,149.8,-47.71
2018-02-12 08:00:00,192.1,-48.23,163.7,-48.05,127.3,-47.65,131.9,-47.76
2018-02-12 09:00:00,123.4,-48.0,137.7,-48.05,89.4,-47.66,117.8,-47.86
2018-02-12 10:00:00,86.5,-47.87,107.7,-47.97,67.9,-47.66,91.5,-47.84
2018-02-12 11:00:00,63.1,-47.78,89.9,-47.92,55.1,-47.66,74.2,-47.81
2018-02-12 12:00:00,43.3,-47.7,66.4,-47.82,37.8,-47.63,60.6,-47.77
2018-02-12 13:00:00,34.9,-47.66,49.3,-47.74,28.7,-47.59,48.4,-47.73
2018-02-12 14:00:00,33.2,-47.66,38.6,-47.69,29.2,-47.6,34.6,-47.67
2018-02-12 15:00:00,38.5,-47.69,34.7,-47.67,34.3,-47.62,32.6,-47.68
2018-02-12 16:00:00,55.5,-47.74,33.7,-47.63,36.1,-47.58,34.5,-47.61
2018-02-12 17:00:00,131.5,-48.03,68.5,-47.68,64.9,-47.55,60.4,-47.5
2018-02-12 18:00:00,174.0,-48.19,95.9,-47.78,78.5,-47.55,67.6,-47.48
2018-02-12 19:00:00,128.0,-48.02,66.1,-47.7,57.6,-47.54,44.8,-47.5
2018-02-12 20:00:00,127.3,-48.02,82.1,-47.78,55.8,-47.56,44.2,-47.5
2018-02-12 21:00:00,110.2,-47.95,70.4,-47.73,47.6,-47.55,36.2,-47.47
2018-02-12 22:00:00,116.1,-47.97,63.1,-47.69,46.9,-47.54,36.6,-47.45
2018-02-12 23:00:00,115.6,-47.97,55.8,-47.67,46.0,-47.57,33.3,-47.47
2018-02-13 00:00:00,83.8,-47.86,33.5,-47.61,35.7,-47.59,25.9,-47.53
2018-02-13 01:00:00,99.8,-47.96,44.9,-47.69,45.3,-47.66,34.2,-47.62
2018-02-13 02:00:00,115.3,-48.01,49.5,-47.69,51.8,-47.67,38.1,-47.59
2018-02-13 03:00:00,124.0,-48.04,50.6,-47.68,53.2,-47.66,45.4,-47.59
2018-02-13 04:00:00,105.6,-47.96,43.2,-47.66,45.9,-47.64,40.1,-47.56
2018-02-13 05:00:00,89.9,-47.9,35.3,-47.63,41.4,-47.63,37.7,-47.58
2018-02-13 06:00:00,78.5,-47.86,32.6,-47.64,39.7,-47.64,37.6,-47.61
2018-02-13 07:00:00,62.0,-47.79,26.2,-47.62,32.3,-47.62,30.7,-47.6
2018-02-13 08:00:00,53.1,-47.75,26.6,-47.63,28.6,-47.61,29.9,-47.62
2018-02-13 09:00:00,45.9,-47.71,23.4,-47.61,25.2,-47.6,25.2,-47.6
2018-02-13 10:00:00,42.4,-47.7,21.7,-47.6,23.8,-47.59,23.1,-47.59
2018-02-13 11:00:00,41.6,-47.69,21.6,-47.6,23.1,-47.58,20.0,-47.58
2018-02-13 12:00:00,43.0,-47.7,22.7,-47.6,24.3,-47.59,20.7,-47.58
2018-02-13 13:00:00,43.9,-47.7,21.8,-47.6,25.1,-47.59,21.8,-47.59
2018-02-13 14:00:00,48.0,-47.71,29.0,-47.62,25.3,-47.59,21.6,-47.56
2018-02-13 15:00:00,60.8,-47.77,66.2,-47.79,30.1,-47.6,24.8,-47.58
2018-02-13 16:00:00,72.3,-47.82,113.7,-48.0,34.1,-47.61,31.8,-47.6
2018-02-13 17:00:00,83.7,-47.86,153.9,-48.17,38.1,-47.62,31.8,-47.58
2018-02-13 18:00:00,91.1,-47.89,179.6,-48.26,40.1,-47.63,39.2,-47.59
2018-02-13 19:00:00,103.6,-47.95,170.7,-48.22,43.0,-47.63,55.6,-47.63
2018-02-13 20:00:00,104.6,-47.95,90.6,-47.87,40.8,-47.63,46.3,-47.58
2018-02-13 21:00:00,113.2,-47.98,60.7,-47.72,40.4,-47.63,47.9,-47.57
2018-02-13 22:00:00,152.0,-48.12,75.9,-47.76,49.2,-47.65,56.3,-47.54
2018-02-13 23:00:00,160.8,-48.15,68.1,-47.71,51.6,-47.65,59.7,-47.52
2018-02-14 00:00:00,120.8,-47.99,60.5,-47.69,45.4,-47.61,52.9,-47.51
2018-02-14 01:00:00,118.8,-47.97,65.3,-47.71,48.6,-47.61,57.5,-47.49
2018-02-14 02:00:00,127.5,-48.0,83.3,-47.78,57.7,-47.62,68.4,-47.54
2018-02-14 03:00:00,174.5,-48.19,138.0,-48.0,86.6,-47.69,107.1,-47.71
2018-02-14 04:00:00,203.7,-48.29,169.4,-48.09,101.3,-47.68,127.8,-47.73
2018-02-14 05:00:00,238.6,-48.4,199.7,-48.16,127.4,-47.68,140.8,-47.73
2018-02-14 06:00:00,300.5,-48.62,193.0,-48.09,151.0,-47.73,134.1,-47.6
2018-02-14 07:00:00,300.3,-48.66,198.7,-48.18,133.5,-47.79,131.8,-47.68
2018-02-14 08:00:00,229.6,-48.43,171.7,-48.16,108.3,-47.78,105.5,-47.68
2018-02-14 09:00:00,132.8,-48.07,85.6,-47.86,66.0,-47.69,62.1,-47.64
2018-02-14 10:00:00,72.3,-47.82,37.9,-47.66,37.9,-47.63,37.1,-47.61
2018-02-14 11:00:00,56.7,-47.78,37.7,-47.69,33.0,-47.64,35.7,-47.67
2018-02-14 12:00:00,64.2,-47.83,46.6,-47.75,40.0,-47.69,44.0,-47.73
2018-02-14 13:00:00,68.4,-47.86,50.6,-47.78,45.0,-47.73,47.9,-47.77
2018-02-14 14:00:00,58.7,-47.79,38.4,-47.7,35.1,-47.66,38.2,-47.68
2018-02-14 15:00:00,59.3,-47.79,39.3,-47.7,36.6,-47.66,39.7,-47.7
2018-02-14 16:00:00,59.3,-47.79,35.7,-47.68,37.3,-47.66,36.9,-47.68
2018-02-14 17:00:00,63.4,-47.8,36.8,-47.67,37.9,-47.66,37.9,-47.66
2018-02-14 18:00:00,68.3,-47.81,36.4,-47.66,37.1,-47.64,38.6,-47.64
2018-02-14 19:00:00,71.0,-47.82,33.4,-47.64,37.6,-47.64,38.2,-47.63
2018-02-14 20:00:00,71.9,-47.82,33.5,-47.64,37.7,-47.63,37.4,-47.62
2018-02-14 21:00:00,79.5,-47.86,41.0,-47.67,40.7,-47.64,36.2,-47.6
2018-02-14 22:00:00,90.1,-47.9,46.7,-47.69,46.2,-47.66,38.0,-47.6
2018-02-14 23:00:00,110.9,-48.0,54.8,-47.72,56.3,-47.69,47.2,-47.62
2018-02-15 00:00:00,135.0,-48.09,72.8,-47.78,66.6,-47.68,57.3,-47.63
2018-02-15 01:00:00,146.2,-48.1,84.9,-47.78,73.7,-47.6,55.6,-47.57
2018-02-15 02:00:00,133.2,-48.02,68.8,-47.68,69.3,-47.52,48.5,-47.5
2018-02-15 03:00:00,133.0,-48.0,69.4,-47.67,70.9,-47.51,51.9,-47.48
2018-02-15 04:00:00,148.4,-48.06,75.3,-47.67,79.3,-47.53,58.0,-47.47
2018-02-15 05:00:00,135.4,-48.01,73.7,-47.69,80.6,-47.57,59.3,-47.52
2018-02-15 06:00:00,146.1,-48.05,79.5,-47.7,90.9,-47.58,65.1,-47.51
2018-02-15 07:00:00,149.5,-48.05,102.3,-47.79,107.3,-47.6,78.7,-47.55
2018-02-15 08:00:00,86.1,-47.86,90.0,-47.87,79.9,-47.71,87.3,-47.83
2018-02-15 09:00:00,47.3,-47.7,43.9,-47.67,35.8,-47.59,45.8,-47.68
2018-02-15 10:00:00,34.7,-47.64,35.2,-47.64,26.9,-47.56,37.0,-47.64
2018-02-15 11:00:00,29.9,-47.62,33.6,-47.63,22.6,-47.55,31.1,-47.6
2018-02-15 12:00:00,26.4,-47.6,27.4,-47.6,20.2,-47.54,28.5,-47.58
2018-02-15 13:00:00,22.9,-47.58,22.1,-47.57,17.0,-47.53,23.5,-47.56
2018-02-15 14:00:00,22.1,-47.58,19.7,-47.56,15.5,-47.52,19.0,-47.54
2018-02-15 15:00:00,25.5,-47.59,22.4,-47.57,18.4,-47.53,19.5,-47.54
2018-02-15 16:00:00,31.3,-47.61,25.8,-47.57,22.1,-47.52,26.9,-47.56
2018-02-15 17:00:00,49.0,-47.68,37.4,-47.6,33.2,-47.53,30.3,-47.52
2018-02-15 18:00:00,68.8,-47.75,49.3,-47.63,46.7,-47.53,34.8,-47.49
2018-02-15 19:00:00,75.4,-47.78,55.8,-47.65,53.2,-47.54,41.4,-47.5
2018-02-15 20:00:00,103.2,-47.88,79.9,-47.72,79.2,-47.58,54.8,-47.5
2018-02-15 21:00:00,155.3,-48.07,104.9,-47.77,123.1,-47.63,76.7,-47.48
2018-02-15 22:00:00,144.5,-48.05,89.8,-47.74,117.2,-47.65,78.1,-47.55
2018-02-15 23:00:00,118.4,-47.96,85.9,-47.77,98.7,-47.66,69.0,-47.58
2018-02-16 00:00:00,116.5,-47.96,94.5,-47.81,96.3,-47.68,74.3,-47.6
2018-02-16 01:00:00,138.7,-48.04,109.2,-47.84,107.7,-47.69,87.1,-47.59
2018-02-16 02:00:00,190.6,-48.21,138.7,-47.89,136.3,-47.68,104.0,-47.52
2018-02-16 03:00:00,223.9,-48.32,158.2,-47.92,153.5,-47.66,119.0,-47.48
2018-02-16 04:00:00,252.1,-48.39,183.6,-47.98,175.4,-47.64,135.0,-47.48
2018-02-16 05:00:00,259.4,-48.42,187.2,-47.98,182.3,-47.66,141.2,-47.5
2018-02-16 06:00:00,257.2,-48.42,170.8,-47.94,175.7,-47.66,131.9,-47.52
2018-02-16 07:00:00,239.9,-48.38,140.0,-47.85,156.6,-47.64,120.4,-47.55
2018-02-16 08:00:00,214.7,-48.32,121.9,-47.82,134.5,-47.65,108.9,-47.58
2018-02-16 09:00:00,179.3,-48.2,107.0,-47.81,112.3,-47.63,91.0,-47.59
2018-02-16 10:00:00,143.6,-48.07,93.1,-47.8,94.6,-47.61,76.8,-47.63
2018-02-16 11:00:00,86.5,-47.85,63.7,-47.73,63.2,-47.59,55.9,-47.64
2018-02-16 12:00:00,41.3,-47.66,40.4,-47.66,35.3,-47.57,34.9,-47.61
2018-02-16 13:00:00,32.8,-47.62,28.2,-47.6,24.6,-47.54,23.8,-47.55
2018-02-16 14:00:00,30.7,-47.61,22.2,-47.57,22.8,-47.53,19.0,-47.53
2018-02-16 15:00:00,32.6,-47.62,19.4,-47.55,20.0,-47.52,17.7,-47.52
2018-02-16 16:00:00,49.8,-47.7,29.2,-47.59,24.0,-47.53,22.5,-47.52
2018-02-16 17:00:00,110.9,-47.95,53.6,-47.65,47.7,-47.58,41.0,-47.47
2018-02-16 18:00:00,196.1,-48.27,80.2,-47.71,76.6,-47.66,66.5,-47.44
2018-02-16 19:00:00,228.1,-48.39,85.0,-47.72,90.4,-47.69,80.1,-47.45
2018-02-16 20:00:00,235.3,-48.42,88.0,-47.74,94.4,-47.71,82.1,-47.44
2018-02-16 21:00:00,335.5,-48.75,226.0,-48.26,126.5,-47.77,99.3,-47.35
2018-02-16 22:00:00,428.6,-49.03,351.0,-48.68,155.0,-47.82,123.2,-47.31
2018-02-16 23:00:00,460.9,-49.12,275.4,-48.35,165.0,-47.84,133.6,-47.25
2018-02-17 00:00:00,510.7,-49.26,695.7,-49.71,179.8,-47.86,142.3,-47.27
2018-02-17 01:00:00,551.5,-49.37,1225.3,-50.94,192.1,-47.88,142.1,-47.34
2018-02-17 02:00:00,559.3,-49.39,1305.5,-51.1,194.0,-47.88,143.1,-47.37
2018-02-17 03:00:00,571.6,-49.42,1297.8,-51.07,194.6,-47.88,182.2,-47.44
2018-02-17 04:00:00,520.3,-49.28,1045.1,-50.59,174.8,-47.85,206.3,-47.58
2018-02-17 05:00:00,519.7,-49.28,1068.3,-50.62,173.7,-47.85,189.9,-47.47
2018-02-17 06:00:00,559.8,-49.38,1176.2,-50.82,185.1,-47.87,190.0,-47.4
2018-02-17 07:00:00,637.4,-49.58,1375.5,-51.16,209.9,-47.92,206.3,-47.39
2018-02-17 08:00:00,690.9,-49.71,1471.7,-51.32,229.6,-47.95,227.9,-47.5
2018-02-17 09:00:00,598.1,-49.49,1143.9,-50.78,205.5,-47.92,198.2,-47.55
2018-02-17 10:00:00,504.8,-49.24,697.2,-49.72,179.7,-47.86,172.7,-47.41
2018-02-17 11:00:00,227.3,-48.36,169.5,-48.08,96.5,-47.64,82.9,-47.48
2018-02-17 12:00:00,84.2,-47.83,53.2,-47.66,48.8,-47.54,44.5,-47.57
2018-02-17 13:00:00,65.9,-47.75,48.1,-47.65,42.1,-47.53,39.2,-47.59
2018-02-17 14:00:00,52.9,-47.7,46.9,-47.66,36.5,-47.52,34.7,-47.59
2018-02-17 15:00:00,52.9,-47.7,43.3,-47.66,38.1,-47.55,34.2,-47.6
2018-02-17 16:00:00,63.6,-47.75,42.8,-47.64,40.7,-47.55,35.9,-47.57
2018-02-17 17:00:00,110.2,-47.94,63.7,-47.68,57.5,-47.57,49.8,-47.52
2018-02-17 18:00:00,211.8,-48.31,106.4,-47.77,97.5,-47.58,77.7,-47.44
2018-02-17 19:00:00,226.4,-48.35,130.5,-47.85,109.6,-47.54,85.9,-47.45
2018-02-17 20:00:00,198.3,-48.25,122.9,-47.84,99.6,-47.56,80.3,-47.49
2018-02-17 21:00:00,251.9,-48.45,146.1,-47.9,115.8,-47.63,94.6,-47.44
2018-02-17 22:00:00,337.0,-48.73,187.1,-48.0,144.1,-47.68,121.0,-47.38
2018-02-17 23:00:00,407.0,-48.95,227.3,-48.12,169.0,-47.74,145.3,-47.38
2018-02-18 00:00:00,437.9,-49.05,217.6,-48.1,175.1,-47.83,153.6,-47.41
2018-02-18 01:00:00,418.2,-49.0,171.5,-47.92,167.8,-47.84,145.2,-47.39
2018-02-18 02:00:00,412.0,-48.98,168.2,-47.92,164.8,-47.85,141.7,-47.37
2018-02-18 03:00:00,434.2,-49.05,224.9,-48.15,172.8,-47.88,144.3,-47.37
2018-02-18 04:00:00,428.0,-49.04,200.6,-48.06,168.9,-47.87,146.4,-47.38
2018-02-18 05:00:00,425.2,-49.03,271.0,-48.35,168.9,-47.88,148.0,-47.41
2018-02-18 06:00:00,554.5,-49.39,730.3,-49.79,211.1,-47.96,193.0,-47.45
2018-02-18 07:00:00,625.4,-49.57,1127.0,-50.7,232.0,-47.98,207.2,-47.48
2018-02-18 08:00:00,539.3,-49.34,1104.1,-50.71,203.0,-47.93,179.4,-47.57
2018-02-18 09:00:00,320.0,-48.71,408.8,-48.99,133.1,-47.82,123.3,-47.62
2018-02-18 10:00:00,150.8,-48.13,76.3,-47.78,76.9,-47.73,70.3,-47.66
2018-02-18 11:00:00,79.9,-47.85,46.3,-47.68,47.0,-47.65,45.2,-47.67
2018-02-18 12:00:00,56.1,-47.74,36.9,-47.65,34.7,-47.61,33.6,-47.63
2018-02-18 13:00:00,54.8,-47.74,34.6,-47.64,34.4,-47.62,31.4,-47.63
2018-02-18 14:00:00,53.0,-47.74,34.0,-47.64,33.2,-47.62,31.8,-47.64
2018-02-18 15:00:00,61.7,-47.78,37.3,-47.66,36.9,-47.64,35.5,-47.65
2018-02-18 16:00:00,78.3,-47.87,47.6,-47.72,47.8,-47.7,48.1,-47.72
2018-02-18 17:00:00,99.7,-47.98,64.4,-47.81,60.3,-47.76,63.8,-47.79
2018-02-18 18:00:00,126.0,-48.1,78.4,-47.89,74.7,-47.83,80.2,-47.85
2018-02-18 19:00:00,149.6,-48.2,86.2,-47.91,84.7,-47.85,89.6,-47.87
2018-02-18 20:00:00,182.1,-48.31,94.5,-47.91,96.6,-47.87,95.2,-47.83
2018-02-18 21:00:00,189.2,-48.33,97.7,-47.9,97.3,-47.85,97.6,-47.79
2018-02-18 22:00:00,211.8,-48.4,106.9,-47.9,105.0,-47.84,103.9,-47.73
2018-02-18 23:00:00,209.8,-48.37,122.6,-47.93,108.7,-47.77,104.9,-47.68
2018-02-19 00:00:00,194.3,-48.3,121.8,-47.92,101.8,-47.71,97.5,-47.65
2018-02-19 01:00:00,196.4,-48.3,128.8,-47.93,102.5,-47.69,95.4,-47.62
2018-02-19 02:00:00,204.9,-48.32,146.7,-47.97,109.9,-47.64,99.9,-47.6
2018-02-19 03:00:00,217.9,-48.36,156.4,-48.01,118.4,-47.63,101.8,-47.61
2018-02-19 04:00:00,213.8,-48.35,147.0,-47.99,120.7,-47.65,96.7,-47.62
2018-02-19 05:00:00,238.1,-48.43,159.5,-48.01,135.7,-47.64,105.1,-47.6
2018-02-19 06:00:00,247.2,-48.46,158.8,-48.0,141.9,-47.64,106.5,-47.61
2018-02-19 07:00:00,217.5,-48.36,144.4,-47.98,137.1,-47.67,101.6,-47.63
2018-02-19 08:00:00,210.9,-48.33,145.7,-47.98,149.6,-47.72,110.0,-47.67
2018-02-19 09:00:00,211.4,-48.33,168.4,-48.08,173.7,-47.82,126.6,-47.76
2018-02-19 10:00:00,211.5,-48.35,198.0,-48.24,192.1,-47.96,158.0,-47.94
2018-02-19 11:00:00,210.9,-48.37,226.8,-48.4,189.4,-48.01,227.2,-48.28
2018-02-19 12:00:00,203.4,-48.38,204.0,-48.38,147.9,-47.95,201.9,-48.26
2018-02-19 13:00:00,207.9,-48.42,196.1,-48.38,114.7,-47.9,153.9,-48.05
2018-02-19 14:00:00,208.2,-48.41,204.6,-48.39,106.2,-47.87,133.5,-47.93
2018-02-19 15:00:00,200.5,-48.34,186.2,-48.26,102.2,-47.82,126.0,-47.84
2018-02-19 16:00:00,179.7,-48.24,148.7,-48.09,95.9,-47.81,117.4,-47.8
2018-02-19 17:00:00,139.0,-48.08,108.0,-47.96,80.2,-47.77,110.4,-47.81
2018-02-19 18:00:00,119.5,-48.0,100.6,-47.96,70.5,-47.75,103.5,-47.82
2018-02-19 19:00:00,124.1,-48.02,101.9,-47.96,71.1,-47.74,106.0,-47.81
2018-02-19 20:00:00,129.0,-48.04,103.7,-47.96,71.2,-47.74,106.9,-47.82
2018-02-19 21:00:00,129.0,-48.04,105.7,-47.98,72.0,-47.76,102.9,-47.83
2018-02-19 22:00:00,151.7,-48.13,122.7,-48.04,83.2,-47.81,113.8,-47.88
2018-02-19 23:00:00,196.1,-48.29,152.5,-48.15,100.5,-47.86,139.3,-47.96
2018-02-20 00:00:00,186.7,-48.25,162.9,-48.2,104.7,-47.89,146.4,-47.99
2018-02-20 01:00:00,240.0,-48.43,215.3,-48.39,119.3,-47.95,171.9,-48.12
2018-02-20 02:00:00,263.1,-48.53,271.3,-48.6,122.3,-47.98,193.6,-48.26
2018-02-20 03:00:00,242.7,-48.47,220.0,-48.41,115.7,-47.96,172.0,-48.2
2018-02-20 04:00:00,240.6,-48.47,211.0,-48.37,111.8,-47.94,163.5,-48.19
2018-02-20 05:00:00,212.4,-48.37,193.0,-48.32,104.4,-47.92,158.6,-48.2
2018-02-20 06:00:00,191.0,-48.28,204.1,-48.34,106.7,-47.93,164.8,-48.21
2018-02-20 07:00:00,139.0,-48.08,157.7,-48.17,86.9,-47.84,132.2,-48.01
2018-02-20 08:00:00,106.2,-47.99,114.3,-48.06,76.8,-47.83,107.0,-47.98
2018-02-20 09:00:00,98.8,-47.96,112.0,-48.06,72.4,-47.81,102.6,-47.99
2018-02-20 10:00:00,85.9,-47.89,105.7,-48.04,61.8,-47.76,95.7,-47.97
2018-02-20 11:00:00,79.6,-47.85,102.5,-47.99,53.7,-47.72,88.7,-47.97
2018-02-20 12:00:00,72.5,-47.78,82.2,-47.84,40.6,-47.66,63.1,-47.85
2018-02-20 13:00:00,53.3,-47.69,49.3,-47.71,27.0,-47.59,37.2,-47.7
2018-02-20 14:00:00,46.7,-47.66,40.6,-47.67,22.1,-47.56,29.9,-47.65
2018-02-20 15:00:00,62.2,-47.71,59.1,-47.71,28.2,-47.59,38.5,-47.7
2018-02-20 16:00:00,60.1,-47.72,48.9,-47.69,27.7,-47.58,34.3,-47.66
2018-02-20 17:00:00,53.0,-47.71,29.4,-47.61,23.1,-47.55,23.0,-47.59
2018-02-20 18:00:00,61.4,-47.73,36.8,-47.62,29.7,-47.57,30.8,-47.59
2018-02-20 19:00:00,102.5,-47.84,81.2,-47.74,62.7,-47.67,73.1,-47.69
2018-02-20 20:00:00,133.7,-47.94,122.2,-47.86,78.1,-47.71,95.8,-47.7
2018-02-20 21:00:00,132.1,-47.94,146.6,-47.97,81.6,-47.71,107.9,-47.76
2018-02-20 22:00:00,144.9,-47.97,157.0,-47.99,94.8,-47.74,115.3,-47.79
2018-02-20 23:00:00,152.1,-47.96,181.7,-48.07,101.3,-47.76,120.0,-47.78
2018-02-21 00:00:00,155.5,-47.95,177.3,-48.03,99.1,-47.75,112.5,-47.72
2018-02-21 01:00:00,157.2,-48.01,163.8,-48.06,106.1,-47.78,107.8,-47.8
2018-02-21 02:00:00,153.0,-48.06,161.7,-48.11,109.5,-47.81,104.9,-47.85
2018-02-21 03:00:00,163.7,-48.12,169.8,-48.16,111.8,-47.82,105.1,-47.86
2018-02-21 04:00:00,181.8,-48.19,182.9,-48.2,115.0,-47.84,110.0,-47.85
2018-02-21 05:00:00,217.4,-48.32,200.9,-48.24,120.9,-47.84,125.8,-47.83
2018-02-21 06:00:00,249.3,-48.43,232.4,-48.33,127.0,-47.86,134.7,-47.78
2018-02-21 07:00:00,255.5,-48.44,242.2,-48.37,126.1,-47.85,140.6,-47.79
2018-02-21 08:00:00,228.5,-48.35,187.2,-48.17,116.1,-47.83,125.7,-47.78
2018-02-21 09:00:00,196.8,-48.24,151.5,-48.05,107.2,-47.8,109.9,-47.77
2018-02-21 10:00:00,151.8,-48.08,134.1,-47.98,94.9,-47.78,98.3,-47.79
2018-02-21 11:00:00,124.1,-47.97,118.6,-47.94,88.1,-47.76,85.5,-47.8
2018-02-21 12:00:00,118.1,-47.94,112.6,-47.92,86.7,-47.76,83.5,-47.8
2018-02-21 13:00:00,113.5,-47.92,111.1,-47.91,83.0,-47.75,84.7,-47.81
2018-02-21 14:00:00,108.6,-47.9,105.4,-47.88,77.9,-47.73,84.9,-47.79
2018-02-21 15:00:00,119.5,-47.94,100.3,-47.86,83.4,-47.75,88.0,-47.8
2018-02-21 16:00:00,130.9,-47.98,113.8,-47.91,86.7,-47.76,93.5,-47.81
2018-02-21 17:00:00,149.3,-48.05,132.7,-47.98,93.3,-47.78,100.0,-47.81
2018-02-21 18:00:00,170.6,-48.14,145.0,-48.02,101.1,-47.8,107.0,-47.81
2018-02-21 19:00:00,183.2,-48.18,189.7,-48.21,103.6,-47.81,116.8,-47.84
2018-02-21 20:00:00,194.1,-48.21,208.2,-48.27,108.6,-47.82,123.4,-47.86
2018-02-21 21:00:00,221.2,-48.3,251.2,-48.41,121.2,-47.85,131.5,-47.84
2018-02-21 22:00:00,229.9,-48.33,271.9,-48.49,125.5,-47.86,127.2,-47.82
2018-02-21 23:00:00,247.0,-48.39,283.5,-48.55,130.5,-47.88,129.0,-47.85
2018-02-22 00:00:00,210.7,-48.26,256.8,-48.47,123.1,-47.86,112.4,-47.84
2018-02-22 01:00:00,182.1,-48.17,234.4,-48.39,115.1,-47.84,105.3,-47.82
2018-02-22 02:00:00,176.0,-48.12,237.4,-48.4,107.8,-47.8,96.7,-47.75
2018-02-22 03:00:00,167.6,-48.06,240.0,-48.41,94.6,-47.73,81.3,-47.65
2018-02-22 04:00:00,176.8,-48.1,244.1,-48.42,89.9,-47.72,75.1,-47.6
2018-02-22 05:00:00,181.4,-48.12,210.1,-48.27,86.5,-47.72,78.4,-47.6
2018-02-22 06:00:00,201.1,-48.19,209.4,-48.25,93.1,-47.74,92.1,-47.64
2018-02-22 07:00:00,204.5,-48.21,229.3,-48.33,93.3,-47.76,93.1,-47.66
2018-02-22 08:00:00,160.3,-48.05,190.3,-48.19,87.0,-47.76,80.5,-47.69
2018-02-22 09:00:00,110.1,-47.87,138.3,-47.98,76.5,-47.72,70.9,-47.69
2018-02-22 10:00:00,96.5,-47.82,112.2,-47.91,71.7,-47.7,61.6,-47.69
2018-02-22 11:00:00,89.7,-47.82,106.5,-47.91,67.7,-47.69,57.9,-47.7
2018-02-22 12:00:00,83.3,-47.8,103.0,-47.9,62.5,-47.67,58.5,-47.71
2018-02-22 13:00:00,77.7,-47.79,96.2,-47.88,58.3,-47.66,55.1,-47.7
2018-02-22 14:00:00,84.9,-47.82,103.7,-47.91,64.6,-47.69,62.5,-47.74
2018-02-22 15:00:00,88.2,-47.83,116.0,-47.96,66.7,-47.69,67.6,-47.76
2018-02-22 16:00:00,92.8,-47.84,126.5,-47.99,65.7,-47.68,67.8,-47.74
2018-02-22 17:00:00,108.5,-47.91,161.8,-48.14,71.9,-47.7,75.5,-47.75
2018-02-22 18:00:00,123.2,-47.97,196.4,-48.28,76.9,-47.72,68.8,-47.69
2018-02-22 19:00:00,160.9,-48.11,264.6,-48.53,93.1,-47.77,81.0,-47.69
2018-02-22 20:00:00,189.9,-48.2,298.9,-48.62,101.3,-47.8,93.6,-47.67
2018-02-22 21:00:00,203.4,-48.24,282.9,-48.51,100.6,-47.8,103.3,-47.66
2018-02-22 22:00:00,207.3,-48.25,298.9,-48.57,101.6,-47.81,103.7,-47.66
2018-02-22 23:00:00,234.4,-48.35,370.0,-48.83,111.4,-47.83,110.4,-47.66
2018-02-23 00:00:00,288.8,-48.54,503.4,-49.27,131.2,-47.88,117.0,-47.63
2018-02-23 01:00:00,363.7,-48.8,683.0,-49.77,156.3,-47.92,141.3,-47.62
2018-02-23 02:00:00,418.7,-48.98,797.6,-50.06,173.6,-47.94,166.1,-47.63
2018-02-23 03:00:00,366.5,-48.83,670.9,-49.76,153.2,-47.89,137.0,-47.56
2018-02-23 04:00:00,354.3,-48.78,633.3,-49.66,143.8,-47.86,127.2,-47.52
2018-02-23 05:00:00,313.6,-48.64,546.6,-49.42,127.7,-47.81,110.1,-47.49
2018-02-23 06:00:00,299.3,-48.59,490.5,-49.26,119.7,-47.79,102.6,-47.49
2018-02-23 07:00:00,246.6,-48.42,356.2,-48.84,101.1,-47.76,92.8,-47.57
2018-02-23 08:00:00,195.8,-48.25,280.1,-48.6,93.6,-47.75,78.7,-47.65
2018-02-23 09:00:00,111.9,-47.94,151.8,-48.12,69.9,-47.71,65.4,-47.75
2018-02-23 10:00:00,82.1,-47.82,103.0,-47.92,59.2,-47.68,55.8,-47.75
2018-02-23 11:00:00,78.2,-47.82,93.5,-47.89,59.1,-47.69,53.6,-47.75
2018-02-23 12:00:00,78.7,-47.82,92.1,-47.89,60.9,-47.7,53.8,-47.76
2018-02-23 13:00:00,81.2,-47.83,93.7,-47.9,62.6,-47.7,56.5,-47.77
2018-02-23 14:00:00,85.9,-47.84,99.5,-47.91,64.0,-47.71,55.2,-47.74
2018-02-23 15:00:00,93.0,-47.86,110.6,-47.95,67.1,-47.72,56.9,-47.73
2018-02-23 16:00:00,93.2,-47.87,113.3,-47.97,66.3,-47.72,57.9,-47.75
2018-02-23 17:00:00,100.3,-47.91,129.6,-48.05,72.0,-47.74,66.3,-47.8
2018-02-23 18:00:00,114.5,-47.95,170.1,-48.2,78.5,-47.74,76.3,-47.79
2018-02-23 19:00:00,138.7,-48.03,233.7,-48.42,84.4,-47.73,76.1,-47.72
2018-02-23 20:00:00,176.3,-48.17,319.5,-48.72,95.2,-47.74,95.4,-47.74
2018-02-23 21:00:00,210.5,-48.28,385.7,-48.93,103.8,-47.75,130.0,-47.9
2018-02-23 22:00:00,239.2,-48.36,457.3,-49.15,116.0,-47.76,122.3,-47.84
2018-02-23 23:00:00,252.1,-48.38,500.1,-49.24,121.9,-47.74,122.2,-47.76
2018-02-24 00:00:00,281.7,-48.47,565.4,-49.41,129.2,-47.74,155.3,-47.83
2018-02-24 01:00:00,326.0,-48.62,649.2,-49.63,139.5,-47.75,202.5,-47.94
2018-02-24 02:00:00,339.7,-48.67,653.1,-49.63,142.5,-47.77,194.0,-47.84
2018-02-24 03:00:00,353.8,-48.72,613.1,-49.53,147.4,-47.79,147.7,-47.55
2018-02-24 04:00:00,379.9,-48.8,695.4,-49.76,157.6,-47.81,156.6,-47.55
2018-02-24 05:00:00,386.8,-48.82,717.4,-49.82,163.6,-47.83,168.3,-47.6
2018-02-24 06:00:00,342.9,-48.68,592.6,-49.5,148.2,-47.8,143.3,-47.58
2018-02-24 07:00:00,270.7,-48.45,466.1,-49.15,126.7,-47.76,118.6,-47.64
2018-02-24 08:00:00,192.7,-48.17,302.9,-48.61,105.5,-47.71,108.8,-47.74
2018-02-24 09:00:00,130.4,-47.92,180.2,-48.13,90.6,-47.67,91.9,-47.76
2018-02-24 10:00:00,111.0,-47.84,147.5,-48.01,82.7,-47.65,84.1,-47.76
2018-02-24 11:00:00,105.9,-47.83,137.1,-47.97,81.6,-47.66,82.6,-47.77
2018-02-24 12:00:00,105.8,-47.83,136.0,-47.97,82.8,-47.66,86.3,-47.79
2018-02-24 13:00:00,106.5,-47.82,140.9,-47.98,82.7,-47.65,90.0,-47.79
2018-02-24 14:00:00,109.9,-47.83,140.5,-47.98,85.5,-47.66,85.9,-47.77
2018-02-24 15:00:00,103.7,-47.82,134.9,-47.96,81.1,-47.65,81.8,-47.76
2018-02-24 16:00:00,101.7,-47.83,139.8,-48.0,74.9,-47.65,77.5,-47.76
2018-02-24 17:00:00,106.2,-47.86,161.3,-48.1,73.1,-47.65,72.5,-47.72
2018-02-24 18:00:00,115.6,-47.9,184.7,-48.2,74.3,-47.66,70.7,-47.69
2018-02-24 19:00:00,121.2,-47.93,199.7,-48.27,73.2,-47.65,79.9,-47.74
2018-02-24 20:00:00,128.2,-47.97,221.8,-48.36,72.1,-47.66,87.2,-47.78
2018-02-24 21:00:00,142.9,-48.03,256.4,-48.5,75.5,-47.67,93.6,-47.8
2018-02-24 22:00:00,152.4,-48.07,275.4,-48.57,78.0,-47.68,104.1,-47.89
2018-02-24 23:00:00,146.0,-48.04,258.1,-48.5,75.4,-47.67,104.0,-47.88
2018-02-25 00:00:00,136.3,-47.99,245.8,-48.44,70.6,-47.64,84.4,-47.75
2018-02-25 01:00:00,154.2,-48.05,293.3,-48.6,75.0,-47.63,96.1,-47.75
2018-02-25 02:00:00,185.8,-48.17,365.7,-48.84,84.6,-47.64,102.2,-47.69
2018-02-25 03:00:00,185.0,-48.16,362.5,-48.83,84.6,-47.63,87.7,-47.59
2018-02-25 04:00:00,176.5,-48.13,351.6,-48.81,80.4,-47.63,79.9,-47.58
2018-02-25 05:00:00,174.9,-48.13,326.6,-48.72,79.2,-47.63,75.6,-47.55
2018-02-25 06:00:00,174.2,-48.13,283.1,-48.57,76.6,-47.63,73.9,-47.56
2018-02-25 07:00:00,153.7,-48.05,225.9,-48.37,71.3,-47.63,66.8,-47.6
2018-02-25 08:00:00,111.9,-47.9,162.7,-48.13,62.4,-47.62,58.1,-47.64
2018-02-25 09:00:00,78.9,-47.77,113.7,-47.93,53.0,-47.6,50.8,-47.67
2018-02-25 10:00:00,71.5,-47.75,98.3,-47.88,50.3,-47.61,46.3,-47.68
2018-02-25 11:00:00,70.3,-47.74,92.5,-47.85,50.4,-47.61,46.2,-47.69
2018-02-25 12:00:00,67.6,-47.73,88.3,-47.84,49.1,-47.61,46.1,-47.68
2018-02-25 13:00:00,72.5,-47.74,97.3,-47.86,53.2,-47.61,50.7,-47.69
2018-02-25 14:00:00,72.9,-47.74,100.0,-47.87,52.8,-47.61,51.8,-47.7
2018-02-25 15:00:00,69.3,-47.73,96.2,-47.86,48.8,-47.6,47.0,-47.67
2018-02-25 16:00:00,70.1,-47.73,100.3,-47.88,47.0,-47.59,44.5,-47.65
2018-02-25 17:00:00,72.4,-47.75,104.7,-47.91,46.8,-47.59,40.8,-47.63
2018-02-25 18:00:00,79.9,-47.78,124.0,-47.99,48.0,-47.6,43.3,-47.63
2018-02-25 19:00:00,102.8,-47.84,162.5,-48.05,56.0,-47.63,63.2,-47.6
2018-02-25 20:00:00,110.0,-47.83,160.1,-48.05,53.5,-47.63,60.1,-47.58
2018-02-25 21:00:00,103.5,-47.83,144.8,-48.06,48.5,-47.63,48.3,-47.61
2018-02-25 22:00:00,98.2,-47.84,140.9,-48.05,45.6,-47.63,44.3,-47.61
2018-02-25 23:00:00,96.2,-47.85,138.9,-48.02,45.2,-47.62,46.6,-47.6
2018-02-26 00:00:00,112.4,-47.92,175.2,-48.17,49.9,-47.62,47.1,-47.56
2018-02-26 01:00:00,144.5,-48.04,229.2,-48.38,58.0,-47.64,53.0,-47.54
2018-02-26 02:00:00,131.3,-47.99,183.7,-48.21,52.3,-47.63,48.5,-47.57
2018-02-26 03:00:00,97.3,-47.85,149.2,-48.08,44.7,-47.61,40.5,-47.59
2018-02-26 04:00:00,103.7,-47.88,168.6,-48.14,46.7,-47.62,45.0,-47.57
2018-02-26 05:00:00,87.3,-47.82,145.0,-48.06,42.6,-47.61,38.8,-47.58
2018-02-26 06:00:00,87.9,-47.82,146.9,-48.06,42.0,-47.6,38.7,-47.56
2018-02-26 07:00:00,95.3,-47.84,142.6,-48.04,43.4,-47.6,41.5,-47.57
2018-02-26 08:00:00,85.8,-47.8,116.6,-47.93,39.7,-47.6,39.0,-47.58
2018-02-26 09:00:00,70.5,-47.73,90.8,-47.83,34.9,-47.59,34.2,-47.59
2018-02-26 10:00:00,55.9,-47.67,67.0,-47.74,31.3,-47.58,29.9,-47.61
2018-02-26 11:00:00,51.3,-47.65,71.8,-47.73,28.5,-47.57,29.4,-47.57
2018-02-26 12:00:00,46.1,-47.64,73.0,-47.74,23.8,-47.55,24.8,-47.55
2018-02-26 13:00:00,38.3,-47.6,52.6,-47.67,20.6,-47.54,20.7,-47.56
2018-02-26 14:00:00,38.3,-47.61,49.0,-47.67,20.9,-47.55,19.6,-47.57
2018-02-26 15:00:00,42.1,-47.62,51.5,-47.68,22.1,-47.55,20.1,-47.57
2018-02-26 16:00:00,46.5,-47.65,57.5,-47.72,23.3,-47.55,20.9,-47.58
2018-02-26 17:00:00,54.3,-47.69,61.9,-47.74,25.0,-47.56,21.4,-47.57
2018-02-26 18:00:00,56.6,-47.71,66.8,-47.76,25.8,-47.56,22.9,-47.57
2018-02-26 19:00:00,63.2,-47.73,71.6,-47.78,26.2,-47.55,24.3,-47.56
2018-02-26 20:00:00,68.8,-47.75,69.8,-47.75,26.7,-47.54,28.0,-47.56
2018-02-26 21:00:00,78.0,-47.78,76.5,-47.77,29.0,-47.55,33.7,-47.56
2018-02-26 22:00:00,86.5,-47.81,87.7,-47.81,30.9,-47.55,36.4,-47.54
2018-02-26 23:00:00,89.8,-47.83,85.2,-47.8,30.8,-47.55,37.0,-47.53
2018-02-27 00:00:00,86.7,-47.81,71.3,-47.73,30.3,-47.55,36.4,-47.52
2018-02-27 01:00:00,87.6,-47.82,77.3,-47.76,30.2,-47.55,37.9,-47.53
2018-02-27 02:00:00,85.1,-47.81,80.0,-47.78,29.5,-47.54,34.4,-47.52
2018-02-27 03:00:00,70.0,-47.75,63.6,-47.71,24.5,-47.53,28.5,-47.51
2018-02-27 04:00:00,62.2,-47.72,49.0,-47.65,22.2,-47.52,26.3,-47.51
2018-02-27 05:00:00,82.2,-47.8,70.6,-47.74,28.6,-47.54,30.4,-47.5
2018-02-27 06:00:00,101.9,-47.88,110.3,-47.91,33.7,-47.55,40.7,-47.51
2018-02-27 07:00:00,108.6,-47.9,94.0,-47.83,34.5,-47.55,44.3,-47.52
2018-02-27 08:00:00,99.2,-47.87,78.9,-47.77,32.3,-47.55,37.2,-47.51
2018-02-27 09:00:00,86.0,-47.82,74.1,-47.76,29.1,-47.55,35.0,-47.52
2018-02-27 10:00:00,59.8,-47.71,59.4,-47.71,22.0,-47.53,27.2,-47.54
2018-02-27 11:00:00,42.3,-47.63,47.5,-47.67,17.8,-47.52,16.7,-47.52
2018-02-27 12:00:00,41.2,-47.62,59.3,-47.72,18.4,-47.53,17.1,-47.52
2018-02-27 13:00:00,42.5,-47.62,63.1,-47.72,20.1,-47.53,23.3,-47.54
2018-02-27 14:00:00,47.9,-47.65,79.8,-47.79,22.7,-47.54,25.1,-47.54
2018-02-27 15:00:00,87.5,-47.81,176.1,-48.18,35.7,-47.57,51.5,-47.6
2018-02-27 16:00:00,138.0,-48.01,281.2,-48.55,52.1,-47.6,65.0,-47.55
2018-02-27 17:00:00,154.1,-48.07,333.3,-48.73,57.0,-47.61,62.5,-47.53
2018-02-27 18:00:00,133.5,-47.99,261.5,-48.47,50.6,-47.59,56.0,-47.52
2018-02-27 19:00:00,173.7,-48.13,327.9,-48.69,63.1,-47.62,59.8,-47.43
2018-02-27 20:00:00,199.6,-48.22,253.6,-48.39,65.9,-47.63,70.0,-47.43
2018-02-27 21:00:00,207.0,-48.24,238.0,-48.34,64.5,-47.63,70.7,-47.46
2018-02-27 22:00:00,216.8,-48.28,240.2,-48.36,65.3,-47.63,72.1,-47.46
2018-02-27 23:00:00,233.3,-48.35,264.7,-48.46,67.3,-47.64,79.8,-47.48
2018-02-28 00:00:00,258.3,-48.44,374.3,-48.87,75.2,-47.65,82.0,-47.47
2018-02-28 01:00:00,156.6,-48.09,192.8,-48.24,50.9,-47.61,48.3,-47.51
2018-02-28 02:00:00,140.8,-48.03,157.9,-48.1,46.1,-47.6,48.9,-47.53
2018-02-28 03:00:00,138.3,-48.02,163.0,-48.12,45.7,-47.6,47.5,-47.53
2018-02-28 04:00:00,98.4,-47.88,157.9,-48.13,42.9,-47.6,40.5,-47.58
2018-02-28 05:00:00,121.3,-47.97,220.5,-48.37,53.9,-47.63,61.9,-47.66
2018-02-28 06:00:00,167.6,-48.13,305.2,-48.66,73.0,-47.67,106.5,-47.81
2018-02-28 07:00:00,180.1,-48.16,318.5,-48.68,87.1,-47.69,107.7,-47.79
2018-02-28 08:00:00,184.7,-48.16,297.0,-48.59,95.7,-47.7,112.6,-47.8
2018-02-28 09:00:00,136.2,-47.96,191.9,-48.18,82.2,-47.65,101.2,-47.79
2018-02-28 10:00:00,90.4,-47.77,118.4,-47.89,63.2,-47.59,68.3,-47.69
2018-02-28 11:00:00,76.7,-47.71,99.2,-47.82,57.1,-47.57,56.3,-47.66
2018-02-28 12:00:00,75.8,-47.7,95.1,-47.79,58.8,-47.57,58.0,-47.66
2018-02-28 13:00:00,69.2,-47.69,87.8,-47.78,55.1,-47.56,55.1,-47.67
2018-02-28 14:00:00,69.5,-47.7,91.0,-47.79,54.3,-47.56,57.5,-47.67
2018-02-28 15:00:00,64.3,-47.67,84.9,-47.76,49.5,-47.56,49.0,-47.62
2018-02-28 16:00:00,62.7,-47.68,87.7,-47.79,45.7,-47.56,41.4,-47.61
2018-02-28 17:00:00,71.5,-47.73,100.1,-47.87,45.9,-47.57,39.6,-47.6
2018-02-28 18:00:00,81.0,-47.77,109.6,-47.9,47.6,-47.58,43.0,-47.6
2018-02-28 19:00:00,81.2,-47.77,108.6,-47.89,48.1,-47.58,43.9,-47.6
2018-02-28 20:00:00,89.6,-47.79,122.0,-47.94,52.2,-47.58,46.9,-47.6
2018-02-28 21:00:00,81.6,-47.75,115.2,-47.9,52.6,-47.57,46.2,-47.59
2018-02-28 22:00:00,82.5,-47.75,121.9,-47.94,51.8,-47.56,45.2,-47.58
2018-02-28 23:00:00,91.7,-47.79,136.1,-47.99,54.6,-47.58,47.4,-47.57
2018-03-01 00:00:00,91.0,-47.79,133.3,-47.98,56.6,-47.59,50.0,-47.59
2018-03-01 01:00:00,85.2,-47.76,121.9,-47.92,58.1,-47.6,54.1,-47.61
2018-03-01 02:00:00,90.6,-47.78,123.5,-47.93,63.5,-47.61,56.9,-47.63
2018-03-01 03:00:00,94.5,-47.8,125.2,-47.93,66.1,-47.62,59.4,-47.63
2018-03-01 04:00:00,91.4,-47.78,123.7,-47.93,66.8,-47.62,59.7,-47.65
2018-03-01 05:00:00,88.7,-47.77,119.1,-47.91,66.4,-47.63,59.2,-47.66
2018-03-01 06:00:00,85.1,-47.75,104.9,-47.84,65.5,-47.62,58.5,-47.66
2018-03-01 07:00:00,84.4,-47.75,103.5,-47.84,66.1,-47.62,57.8,-47.66
2018-03-01 08:00:00,87.2,-47.76,107.7,-47.86,67.7,-47.63,59.9,-47.67
2018-03-01 09:00:00,91.6,-47.78,119.6,-47.91,70.2,-47.63,62.8,-47.68
2018-03-01 10:00:00,98.7,-47.81,133.7,-47.97,72.7,-47.64,63.9,-47.68
2018-03-01 11:00:00,97.6,-47.8,123.9,-47.93,73.4,-47.64,64.5,-47.69
2018-03-01 12:00:00,97.6,-47.79,118.6,-47.9,76.2,-47.64,68.6,-47.7
2018-03-01 13:00:00,100.5,-47.78,125.9,-47.91,78.0,-47.63,73.2,-47.7
2018-03-01 14:00:00,105.7,-47.8,132.5,-47.93,81.0,-47.63,74.8,-47.69
2018-03-01 15:00:00,104.9,-47.79,132.2,-47.93,80.3,-47.63,73.3,-47.68
2018-03-01 16:00:00,104.7,-47.79,132.7,-47.93,80.6,-47.63,75.4,-47.68
2018-03-01 17:00:00,105.1,-47.79,131.3,-47.93,81.7,-47.63,75.3,-47.68
2018-03-01 18:00:00,115.3,-47.82,146.3,-47.97,86.1,-47.63,83.3,-47.69
2018-03-01 19:00:00,118.3,-47.83,151.6,-47.99,88.1,-47.64,81.3,-47.67
2018-03-01 20:00:00,114.8,-47.82,142.9,-47.96,87.5,-47.64,86.5,-47.7
2018-03-01 21:00:00,112.3,-47.81,142.6,-47.95,88.1,-47.65,97.2,-47.76
2018-03-01 22:00:00,116.9,-47.81,151.3,-47.97,90.5,-47.64,89.5,-47.68
2018-03-01 23:00:00,119.3,-47.82,151.6,-47.97,92.5,-47.64,86.9,-47.67
2018-03-02 00:00:00,115.3,-47.79,143.4,-47.93,91.1,-47.62,86.0,-47.66
2018-03-02 01:00:00,115.2,-47.79,143.8,-47.91,91.2,-47.62,85.9,-47.65
2018-03-02 02:00:00,123.6,-47.81,158.6,-47.98,94.9,-47.62,87.0,-47.64
2018-03-02 03:00:00,125.4,-47.82,150.4,-47.95,96.8,-47.63,86.0,-47.65
2018-03-02 04:00:00,122.9,-47.8,146.3,-47.92,97.0,-47.63,84.5,-47.64
2018-03-02 05:00:00,122.4,-47.8,144.2,-47.91,97.7,-47.63,85.9,-47.64
2018-03-02 06:00:00,120.6,-47.79,138.4,-47.88,98.1,-47.63,86.5,-47.65
2018-03-02 07:00:00,117.7,-47.79,138.1,-47.88,95.1,-47.63,84.6,-47.64
2018-03-02 08:00:00,119.3,-47.79,139.5,-47.89,96.2,-47.63,86.1,-47.65
2018-03-02 09:00:00,117.0,-47.79,135.9,-47.89,95.8,-47.64,84.9,-47.66
2018-03-02 10:00:00,119.3,-47.78,137.7,-47.89,98.2,-47.63,88.3,-47.67
2018-03-02 11:00:00,129.9,-47.82,157.4,-47.94,106.0,-47.65,95.6,-47.67
2018-03-02 12:00:00,136.8,-47.83,165.4,-47.96,109.9,-47.64,100.7,-47.67
2018-03-02 13:00:00,144.6,-47.84,173.6,-47.98,116.1,-47.64,109.0,-47.7
2018-03-02 14:00:00,158.1,-47.9,205.8,-48.08,122.1,-47.66,123.6,-47.72
2018-03-02 15:00:00,173.0,-47.96,232.4,-48.18,126.8,-47.67,135.2,-47.77
2018-03-02 16:00:00,174.1,-47.96,230.2,-48.19,127.7,-47.68,133.5,-47.81
2018-03-02 17:00:00,174.4,-47.98,250.7,-48.28,126.0,-47.69,128.4,-47.78
2018-03-02 18:00:00,203.2,-48.09,301.7,-48.47,133.4,-47.7,138.8,-47.75
2018-03-02 19:00:00,188.2,-48.05,270.5,-48.37,126.1,-47.69,123.5,-47.72
2018-03-02 20:00:00,187.9,-48.08,279.7,-48.43,119.4,-47.7,124.7,-47.75
2018-03-02 21:00:00,178.0,-48.08,267.8,-48.43,113.0,-47.72,122.8,-47.8
2018-03-02 22:00:00,187.6,-48.12,288.0,-48.51,117.3,-47.74,121.6,-47.78
2018-03-02 23:00:00,202.3,-48.19,319.1,-48.63,123.3,-47.76,125.6,-47.78
2018-03-03 00:00:00,225.3,-48.27,377.3,-48.84,131.7,-47.78,145.9,-47.85
2018-03-03 01:00:00,264.5,-48.41,451.1,-49.08,145.7,-47.82,156.1,-47.84
2018-03-03 02:00:00,287.3,-48.5,492.5,-49.2,155.7,-47.85,181.5,-47.94
2018-03-03 03:00:00,277.0,-48.48,474.5,-49.15,154.3,-47.86,180.6,-47.96
2018-03-03 04:00:00,295.1,-48.54,503.0,-49.24,162.3,-47.88,192.9,-48.04
2018-03-03 05:00:00,320.8,-48.62,557.2,-49.39,171.4,-47.9,212.0,-48.07
2018-03-03 06:00:00,334.4,-48.66,585.0,-49.46,174.1,-47.9,202.3,-47.96
2018-03-03 07:00:00,349.6,-48.7,594.8,-49.48,180.2,-47.91,219.8,-48.03
2018-03-03 08:00:00,323.1,-48.61,524.6,-49.29,175.0,-47.9,182.8,-47.86
2018-03-03 09:00:00,357.6,-48.71,613.8,-49.52,190.5,-47.92,214.5,-47.97
2018-03-03 10:00:00,390.4,-48.79,667.2,-49.63,205.5,-47.94,256.9,-48.1
2018-03-03 11:00:00,374.2,-48.7,597.6,-49.4,213.8,-47.92,232.1,-47.94
2018-03-03 12:00:00,291.0,-48.4,403.8,-48.81,194.6,-47.88,182.6,-47.85
2018-03-03 13:00:00,242.7,-48.23,324.8,-48.54,180.5,-47.85,183.2,-47.94
2018-03-03 14:00:00,218.9,-48.16,285.5,-48.42,166.9,-47.83,161.3,-47.89
2018-03-03 15:00:00,199.5,-48.1,256.6,-48.33,151.6,-47.8,146.6,-47.86
2018-03-03 16:00:00,199.5,-48.1,254.8,-48.33,150.1,-47.79,145.6,-47.88
2018-03-03 17:00:00,198.5,-48.11,264.7,-48.39,146.0,-47.79,128.3,-47.8
2018-03-03 18:00:00,214.3,-48.16,288.0,-48.47,154.5,-47.8,140.5,-47.83
2018-03-03 19:00:00,230.6,-48.22,312.7,-48.55,162.5,-47.82,164.3,-47.94
2018-03-03 20:00:00,254.2,-48.28,338.9,-48.61,177.0,-47.85,184.6,-48.0
2018-03-03 21:00:00,291.9,-48.44,441.7,-48.95,184.6,-47.88,186.6,-47.93
2018-03-03 22:00:00,361.0,-48.72,610.6,-49.5,194.6,-47.93,172.1,-47.8
2018-03-03 23:00:00,451.7,-49.05,878.8,-50.23,213.7,-47.99,153.9,-47.65
2018-03-04 00:00:00,516.8,-49.25,1041.3,-50.58,230.1,-48.01,173.8,-47.67
2018-03-04 01:00:00,547.8,-49.34,1080.4,-50.66,236.2,-48.02,215.0,-47.8
2018-03-04 02:00:00,536.3,-49.31,1065.4,-50.64,226.8,-47.98,178.9,-47.7
2018-03-04 03:00:00,461.9,-49.11,920.6,-50.36,196.6,-47.92,128.2,-47.57
2018-03-04 04:00:00,428.4,-49.02,841.0,-50.19,178.5,-47.89,112.2,-47.55
2018-03-04 05:00:00,416.4,-49.0,815.7,-50.14,173.2,-47.91,118.3,-47.59
2018-03-04 06:00:00,384.4,-48.9,796.8,-50.12,161.9,-47.89,94.3,-47.53
2018-03-04 07:00:00,384.4,-48.91,731.0,-49.96,161.9,-47.89,87.1,-47.53
2018-03-04 08:00:00,396.6,-48.94,679.7,-49.81,164.8,-47.9,110.0,-47.56
2018-03-04 09:00:00,214.1,-48.35,170.9,-48.16,102.8,-47.79,78.6,-47.63
2018-03-04 10:00:00,131.5,-48.04,77.5,-47.8,73.8,-47.72,59.6,-47.67
2018-03-04 11:00:00,121.6,-48.0,67.1,-47.75,68.7,-47.71,58.6,-47.67
2018-03-04 12:00:00,110.6,-47.94,84.3,-47.83,60.3,-47.67,50.8,-47.65
2018-03-04 13:00:00,114.0,-47.94,113.2,-47.94,55.5,-47.62,42.9,-47.59
2018-03-04 14:00:00,108.4,-47.91,77.6,-47.77,53.5,-47.61,41.1,-47.56
2018-03-04 15:00:00,115.1,-47.94,66.2,-47.7,59.5,-47.63,49.1,-47.58
2018-03-04 16:00:00,132.7,-48.01,127.6,-47.97,64.8,-47.63,51.3,-47.59
2018-03-04 17:00:00,107.8,-47.91,110.3,-47.92,60.5,-47.64,50.5,-47.64
2018-03-04 18:00:00,121.8,-47.99,80.7,-47.8,72.2,-47.7,62.3,-47.68
2018-03-04 19:00:00,211.7,-48.34,119.3,-47.91,110.0,-47.78,92.7,-47.67
2018-03-04 20:00:00,227.7,-48.4,131.3,-47.94,119.5,-47.73,90.8,-47.66
2018-03-04 21:00:00,152.4,-48.1,97.4,-47.83,85.8,-47.65,63.3,-47.66
2018-03-04 22:00:00,139.9,-48.02,80.4,-47.72,77.5,-47.6,54.3,-47.57
2018-03-04 23:00:00,144.5,-48.02,87.0,-47.74,79.8,-47.59,54.1,-47.53
2018-03-05 00:00:00,145.5,-48.03,88.0,-47.74,82.7,-47.6,55.5,-47.55
2018-03-05 01:00:00,155.9,-48.06,82.6,-47.71,87.8,-47.61,57.8,-47.56
2018-03-05 02:00:00,163.0,-48.08,87.1,-47.71,89.3,-47.57,60.0,-47.5
2018-03-05 03:00:00,176.8,-48.13,89.0,-47.7,91.8,-47.58,62.6,-47.46
2018-03-05 04:00:00,205.3,-48.25,103.5,-47.77,103.2,-47.62,68.3,-47.5
2018-03-05 05:00:00,215.4,-48.3,138.7,-47.93,111.8,-47.67,81.0,-47.57
2018-03-05 06:00:00,263.9,-48.49,141.8,-47.93,128.8,-47.77,97.1,-47.58
2018-03-05 07:00:00,264.1,-48.51,123.2,-47.88,127.5,-47.82,97.1,-47.62
2018-03-05 08:00:00,186.1,-48.23,89.3,-47.8,101.7,-47.79,82.3,-47.68
2018-03-05 09:00:00,129.9,-48.02,67.2,-47.74,80.0,-47.74,64.6,-47.67
2018-03-05 10:00:00,109.6,-47.93,65.5,-47.74,73.8,-47.73,59.9,-47.69
2018-03-05 11:00:00,90.5,-47.84,55.7,-47.7,63.5,-47.68,49.7,-47.66
2018-03-05 12:00:00,74.6,-47.76,49.6,-47.66,52.6,-47.63,40.6,-47.62
2018-03-05 13:00:00,83.1,-47.8,71.1,-47.75,56.2,-47.64,43.7,-47.63
2018-03-05 14:00:00,94.2,-47.84,111.8,-47.94,58.9,-47.64,45.5,-47.64
2018-03-05 15:00:00,103.4,-47.88,158.2,-48.13,61.2,-47.64,46.2,-47.63
2018-03-05 16:00:00,108.6,-47.9,171.4,-48.18,59.7,-47.63,38.7,-47.59
2018-03-05 17:00:00,111.2,-47.9,170.0,-48.16,61.3,-47.63,44.2,-47.59
2018-03-05 18:00:00,145.4,-48.04,226.5,-48.37,81.9,-47.67,66.7,-47.66
2018-03-05 19:00:00,152.5,-48.08,230.2,-48.39,93.1,-47.71,87.3,-47.76
2018-03-05 20:00:00,148.1,-48.07,191.6,-48.25,88.6,-47.72,81.4,-47.75
2018-03-05 21:00:00,136.8,-48.03,147.6,-48.08,78.0,-47.69,61.1,-47.67
2018-03-05 22:00:00,116.3,-47.96,97.4,-47.87,66.4,-47.67,48.3,-47.63
2018-03-05 23:00:00,114.3,-47.96,70.8,-47.76,68.4,-47.7,51.9,-47.65
2018-03-06 00:00:00,99.3,-47.91,54.9,-47.7,60.9,-47.69,45.2,-47.69
2018-03-06 01:00:00,102.4,-47.92,60.0,-47.72,66.5,-47.68,47.1,-47.7
2018-03-06 02:00:00,105.9,-47.94,67.3,-47.77,72.8,-47.72,55.1,-47.74
2018-03-06 03:00:00,106.2,-47.95,75.1,-47.81,78.6,-47.74,61.6,-47.78
2018-03-06 04:00:00,107.6,-47.95,78.8,-47.83,85.2,-47.76,71.1,-47.84
2018-03-06 05:00:00,109.4,-47.96,78.2,-47.83,90.4,-47.78,72.2,-47.85
2018-03-06 06:00:00,127.7,-48.0,78.5,-47.78,92.9,-47.72,71.5,-47.75
2018-03-06 07:00:00,136.1,-48.02,85.3,-47.78,88.1,-47.67,66.0,-47.67
2018-03-06 08:00:00,123.1,-47.95,82.9,-47.77,81.6,-47.64,57.9,-47.64
2018-03-06 09:00:00,116.4,-47.91,82.3,-47.77,82.0,-47.64,59.7,-47.66
2018-03-06 10:00:00,109.1,-47.88,82.2,-47.78,81.7,-47.66,60.7,-47.68
2018-03-06 11:00:00,96.4,-47.82,77.3,-47.76,76.7,-47.66,58.2,-47.69
2018-03-06 12:00:00,90.7,-47.79,69.9,-47.72,70.9,-47.64,53.2,-47.66
2018-03-06 13:00:00,87.7,-47.79,68.1,-47.72,67.1,-47.63,47.6,-47.64
2018-03-06 14:00:00,95.9,-47.82,78.3,-47.75,73.5,-47.65,51.7,-47.65
2018-03-06 15:00:00,109.7,-47.87,89.1,-47.79,81.8,-47.66,56.7,-47.66
2018-03-06 16:00:00,118.7,-47.92,91.4,-47.81,89.4,-47.7,63.1,-47.72
2018-03-06 17:00:00,140.9,-48.01,99.0,-47.83,98.7,-47.73,69.5,-47.72
2018-03-06 18:00:00,180.7,-48.18,120.9,-47.9,112.0,-47.78,84.4,-47.7
2018-03-06 19:00:00,273.2,-48.5,158.7,-47.96,145.6,-47.82,114.3,-47.61
2018-03-06 20:00:00,383.2,-48.86,217.9,-48.13,181.0,-47.88,143.6,-47.53
2018-03-06 21:00:00,532.7,-49.29,290.7,-48.32,230.9,-47.97,190.1,-47.44
2018-03-06 22:00:00,634.3,-49.54,465.4,-48.87,268.1,-48.0,220.3,-47.37
2018-03-06 23:00:00,683.1,-49.65,705.1,-49.58,285.2,-48.01,224.3,-47.34
2018-03-07 00:00:00,534.9,-49.24,422.5,-48.72,246.0,-47.79,199.6,-47.31
2018-03-07 01:00:00,413.0,-48.89,290.2,-48.31,210.5,-47.67,169.1,-47.39
2018-03-07 02:00:00,432.0,-48.94,310.6,-48.37,214.3,-47.69,174.9,-47.37
2018-03-07 03:00:00,418.8,-48.89,304.3,-48.38,197.3,-47.74,183.4,-47.45
2018-03-07 04:00:00,294.2,-48.5,206.8,-48.12,157.6,-47.78,162.2,-47.66
2018-03-07 05:00:00,170.0,-48.08,124.3,-47.91,118.1,-47.77,109.9,-47.74
2018-03-07 06:00:00,132.9,-47.97,98.7,-47.84,92.3,-47.72,80.6,-47.71
2018-03-07 07:00:00,131.7,-47.97,94.0,-47.84,89.2,-47.72,74.8,-47.7
2018-03-07 08:00:00,135.0,-47.99,99.6,-47.86,86.8,-47.73,78.6,-47.71
2018-03-07 09:00:00,170.4,-48.15,137.6,-48.01,101.3,-47.76,98.2,-47.75
2018-03-07 10:00:00,158.6,-48.11,125.3,-47.97,109.9,-47.78,110.9,-47.88
2018-03-07 11:00:00,152.5,-48.1,140.3,-48.07,120.6,-47.84,128.8,-48.01
2018-03-07 12:00:00,149.5,-48.11,171.9,-48.23,132.1,-47.93,149.7,-48.16
2018-03-07 13:00:00,123.8,-47.97,148.1,-48.12,107.7,-47.83,122.8,-48.05
2018-03-07 14:00:00,104.4,-47.86,114.3,-47.94,91.7,-47.74,95.8,-47.88
2018-03-07 15:00:00,79.0,-47.77,79.8,-47.8,72.0,-47.68,68.6,-47.79
2018-03-07 16:00:00,39.4,-47.6,38.6,-47.59,33.1,-47.53,35.4,-47.58
2018-03-07 17:00:00,40.2,-47.61,29.6,-47.55,31.7,-47.51,27.6,-47.53
2018-03-07 18:00:00,67.7,-47.72,40.8,-47.57,49.3,-47.53,37.7,-47.52
2018-03-07 19:00:00,98.4,-47.84,51.0,-47.59,62.9,-47.53,50.1,-47.53
2018-03-07 20:00:00,119.6,-47.93,66.6,-47.65,65.8,-47.51,50.2,-47.5
2018-03-07 21:00:00,116.4,-47.91,62.8,-47.62,59.1,-47.49,41.7,-47.44
2018-03-07 22:00:00,125.5,-47.94,66.2,-47.62,57.1,-47.46,40.2,-47.4
2018-03-07 23:00:00,125.9,-47.94,79.6,-47.69,55.2,-47.47,40.9,-47.4
2018-03-08 00:00:00,107.8,-47.88,83.8,-47.73,51.2,-47.5,38.1,-47.45
2018-03-08 01:00:00,87.5,-47.82,58.6,-47.66,43.2,-47.52,31.1,-47.51
2018-03-08 02:00:00,76.8,-47.81,41.0,-47.62,39.6,-47.58,31.0,-47.61
2018-03-08 03:00:00,76.1,-47.8,52.7,-47.67,43.0,-47.57,35.0,-47.64
2018-03-08 04:00:00,72.6,-47.77,53.7,-47.67,39.4,-47.54,29.5,-47.56
2018-03-08 05:00:00,64.8,-47.72,37.1,-47.58,33.0,-47.51,22.5,-47.5
2018-03-08 06:00:00,64.7,-47.69,32.3,-47.52,37.9,-47.47,25.6,-47.45
2018-03-08 07:00:00,58.4,-47.66,31.1,-47.52,39.2,-47.48,28.0,-47.46
2018-03-08 08:00:00,42.6,-47.61,25.3,-47.52,30.9,-47.49,22.9,-47.49
2018-03-08 09:00:00,33.6,-47.58,23.5,-47.53,26.8,-47.51,22.3,-47.52
2018-03-08 10:00:00,28.6,-47.57,23.0,-47.55,26.1,-47.53,21.8,-47.54
2018-03-08 11:00:00,28.9,-47.58,29.2,-47.59,25.7,-47.53,28.9,-47.6
2018-03-08 12:00:00,31.5,-47.59,43.8,-47.67,26.7,-47.54,41.7,-47.66
2018-03-08 13:00:00,32.2,-47.59,49.3,-47.7,26.1,-47.54,48.8,-47.7
2018-03-08 14:00:00,28.3,-47.57,43.8,-47.67,22.8,-47.52,41.9,-47.66
2018-03-08 15:00:00,22.2,-47.52,23.6,-47.53,17.3,-47.48,21.4,-47.52
2018-03-08 16:00:00,23.4,-47.52,19.1,-47.5,16.8,-47.46,20.3,-47.49
2018-03-08 17:00:00,44.3,-47.61,32.8,-47.53,30.6,-47.47,33.3,-47.5
2018-03-08 18:00:00,96.7,-47.8,64.3,-47.6,68.0,-47.5,47.4,-47.42
2018-03-08 19:00:00,106.5,-47.86,50.9,-47.56,61.6,-47.49,46.1,-47.45
2018-03-08 20:00:00,95.4,-47.82,51.0,-47.58,56.4,-47.51,42.6,-47.46
2018-03-08 21:00:00,106.8,-47.86,58.4,-47.6,63.5,-47.51,47.6,-47.47
2018-03-08 22:00:00,116.9,-47.9,64.7,-47.62,69.7,-47.51,54.5,-47.47
2018-03-08 23:00:00,133.3,-47.96,75.9,-47.64,84.4,-47.54,65.6,-47.48
2018-03-09 00:00:00,147.6,-48.0,82.4,-47.65,96.6,-47.54,75.2,-47.48
2018-03-09 01:00:00,156.8,-48.03,93.6,-47.68,103.9,-47.54,82.6,-47.46
2018-03-09 02:00:00,177.6,-48.09,122.7,-47.78,124.7,-47.57,96.6,-47.43
2018-03-09 03:00:00,208.6,-48.2,146.5,-47.83,140.6,-47.59,109.9,-47.4
2018-03-09 04:00:00,259.6,-48.39,155.6,-47.81,154.6,-47.63,124.4,-47.33
2018-03-09 05:00:00,408.8,-48.87,183.7,-47.81,189.8,-47.65,150.9,-47.21
2018-03-09 06:00:00,514.5,-49.19,230.8,-47.95,209.7,-47.72,170.9,-47.13
2018-03-09 07:00:00,504.5,-49.19,212.0,-47.96,192.9,-47.77,166.8,-47.24
2018-03-09 08:00:00,341.2,-48.73,213.1,-48.15,138.6,-47.72,123.4,-47.47
2018-03-09 09:00:00,287.5,-48.55,442.9,-49.06,118.6,-47.71,115.3,-47.55
2018-03-09 10:00:00,209.0,-48.27,338.5,-48.76,86.6,-47.64,77.9,-47.55
2018-03-09 11:00:00,77.1,-47.76,124.6,-47.97,34.4,-47.51,33.4,-47.5
2018-03-09 12:00:00,70.2,-47.74,123.1,-47.98,32.9,-47.53,31.6,-47.53
2018-03-09 13:00:00,81.6,-47.81,123.5,-48.0,42.6,-47.6,44.0,-47.64
2018-03-09 14:00:00,104.8,-47.92,137.8,-48.06,56.9,-47.65,57.7,-47.7
2018-03-09 15:00:00,113.1,-47.93,157.3,-48.12,57.2,-47.63,60.5,-47.67
2018-03-09 16:00:00,123.5,-47.97,197.5,-48.27,61.8,-47.63,63.0,-47.65
2018-03-09 17:00:00,149.9,-48.07,271.5,-48.56,75.7,-47.67,73.8,-47.67
2018-03-09 18:00:00,169.5,-48.14,316.5,-48.71,85.2,-47.69,86.3,-47.7
2018-03-09 19:00:00,201.7,-48.25,392.9,-48.95,99.0,-47.7,101.7,-47.72
2018-03-09 20:00:00,188.1,-48.21,244.6,-48.42,94.3,-47.7,91.1,-47.69
2018-03-09 21:00:00,162.4,-48.13,74.4,-47.72,82.7,-47.71,75.3,-47.62
2018-03-09 22:00:00,166.2,-48.16,84.9,-47.77,87.3,-47.73,73.7,-47.63
2018-03-09 23:00:00,165.9,-48.17,95.4,-47.82,88.9,-47.73,81.2,-47.69
2018-03-10 00:00:00,173.1,-48.2,115.7,-47.91,95.7,-47.72,86.3,-47.69
2018-03-10 01:00:00,188.4,-48.25,121.9,-47.92,98.9,-47.73,92.0,-47.69
2018-03-10 02:00:00,186.6,-48.25,108.3,-47.87,98.4,-47.74,90.8,-47.7
2018-03-10 03:00:00,190.0,-48.26,100.0,-47.83,98.7,-47.74,89.8,-47.67
2018-03-10 04:00:00,187.4,-48.24,102.8,-47.82,96.4,-47.7,92.9,-47.64
2018-03-10 05:00:00,194.4,-48.26,102.5,-47.82,96.7,-47.71,92.4,-47.62
2018-03-10 06:00:00,231.6,-48.4,113.2,-47.85,108.6,-47.77,98.8,-47.59
2018-03-10 07:00:00,208.6,-48.32,112.1,-47.86,103.8,-47.77,94.9,-47.61
2018-03-10 08:00:00,172.7,-48.19,100.7,-47.86,93.2,-47.76,86.2,-47.67
2018-03-10 09:00:00,143.8,-48.08,96.7,-47.86,84.5,-47.73,81.4,-47.69
2018-03-10 10:00:00,128.9,-48.02,101.4,-47.87,80.6,-47.68,83.1,-47.74
2018-03-10 11:00:00,126.1,-48.0,103.7,-47.88,77.3,-47.66,74.3,-47.7
2018-03-10 12:00:00,112.2,-47.94,84.7,-47.8,65.0,-47.63,63.7,-47.66
2018-03-10 13:00:00,103.0,-47.9,62.2,-47.71,57.9,-47.63,52.9,-47.63
2018-03-10 14:00:00,104.3,-47.92,63.2,-47.72,61.0,-47.66,53.9,-47.65
2018-03-10 15:00:00,74.6,-47.79,53.8,-47.69,48.1,-47.6,42.4,-47.65
2018-03-10 16:00:00,55.3,-47.68,32.0,-47.56,32.4,-47.5,25.6,-47.52
2018-03-10 17:00:00,65.3,-47.7,31.4,-47.51,33.2,-47.46,25.4,-47.44
2018-03-10 18:00:00,102.3,-47.84,52.1,-47.56,47.6,-47.45,37.9,-47.4
2018-03-10 19:00:00,141.9,-47.99,69.5,-47.6,62.9,-47.46,48.4,-47.38
2018-03-10 20:00:00,184.3,-48.15,94.5,-47.67,79.8,-47.46,64.7,-47.34
2018-03-10 21:00:00,218.1,-48.26,123.5,-47.75,93.0,-47.46,78.5,-47.29
2018-03-10 22:00:00,258.6,-48.38,149.8,-47.76,113.1,-47.4,97.0,-47.2
2018-03-10 23:00:00,320.4,-48.56,163.7,-47.75,140.9,-47.41,118.8,-47.08
2018-03-11 00:00:00,428.2,-48.91,359.6,-48.45,172.9,-47.55,148.0,-47.08
2018-03-11 01:00:00,546.5,-49.25,678.7,-49.43,209.3,-47.67,191.8,-47.09
2018-03-11 02:00:00,653.6,-49.54,995.3,-50.26,236.9,-47.76,229.0,-47.19
2018-03-11 03:00:00,752.9,-49.78,1642.1,-51.46,263.0,-47.85,287.9,-47.32
2018-03-11 04:00:00,798.9,-49.9,1739.3,-51.63,273.6,-47.9,300.3,-47.46
2018-03-11 05:00:00,701.1,-49.68,1507.4,-51.32,239.4,-47.87,275.6,-47.55
2018-03-11 06:00:00,652.1,-49.56,1349.0,-51.06,218.3,-47.84,290.2,-47.56
2018-03-11 07:00:00,706.4,-49.69,1385.6,-51.13,225.3,-47.85,355.9,-47.79
2018-03-11 08:00:00,429.8,-48.96,739.7,-49.85,137.9,-47.71,259.1,-47.97
2018-03-11 09:00:00,276.0,-48.48,488.8,-49.19,89.2,-47.62,162.7,-47.81
2018-03-11 10:00:00,188.7,-48.17,323.0,-48.69,62.1,-47.56,88.3,-47.59
2018-03-11 11:00:00,122.7,-47.93,211.2,-48.29,41.2,-47.52,71.2,-47.6
2018-03-11 12:00:00,102.4,-47.85,186.5,-48.2,36.1,-47.51,61.5,-47.6
2018-03-11 13:00:00,112.1,-47.87,214.0,-48.27,40.5,-47.52,61.3,-47.56
2018-03-11 14:00:00,149.3,-47.97,278.9,-48.44,55.2,-47.56,90.7,-47.58
2018-03-11 15:00:00,163.2,-47.97,292.9,-48.41,62.9,-47.58,112.5,-47.59
2018-03-11 16:00:00,172.9,-47.97,305.1,-48.37,69.5,-47.6,136.2,-47.62
2018-03-11 17:00:00,191.2,-48.03,344.2,-48.54,85.2,-47.64,154.2,-47.72
2018-03-11 18:00:00,214.8,-48.15,383.0,-48.71,103.1,-47.7,161.8,-47.79
2018-03-11 19:00:00,251.2,-48.3,462.5,-49.0,117.0,-47.73,172.8,-47.82
2018-03-11 20:00:00,256.8,-48.4,457.4,-49.1,116.3,-47.73,128.5,-47.72
2018-03-11 21:00:00,194.5,-48.23,346.8,-48.81,88.8,-47.68,85.6,-47.65
2018-03-11 22:00:00,248.5,-48.42,494.5,-49.28,103.4,-47.71,102.2,-47.63
2018-03-11 23:00:00,200.7,-48.25,383.6,-48.93,85.5,-47.66,85.3,-47.63
2018-03-12 00:00:00,181.1,-48.17,347.0,-48.81,80.0,-47.64,70.8,-47.6
2018-03-12 01:00:00,212.4,-48.29,406.8,-49.01,92.6,-47.68,75.2,-47.61
2018-03-12 02:00:00,192.5,-48.21,352.5,-48.83,86.0,-47.67,62.8,-47.61
2018-03-12 03:00:00,204.5,-48.25,349.5,-48.8,88.9,-47.67,101.3,-47.74
2018-03-12 04:00:00,201.0,-48.24,330.5,-48.73,85.2,-47.66,129.5,-47.87
2018-03-12 05:00:00,201.7,-48.24,344.7,-48.78,87.1,-47.67,96.8,-47.74
2018-03-12 06:00:00,202.2,-48.23,359.6,-48.83,87.0,-47.66,108.5,-47.76
2018-03-12 07:00:00,239.6,-48.37,443.7,-49.09,98.6,-47.68,130.8,-47.79
2018-03-12 08:00:00,272.3,-48.48,504.9,-49.26,108.2,-47.69,152.0,-47.79
2018-03-12 09:00:00,284.2,-48.52,396.1,-48.89,109.0,-47.7,136.9,-47.63
2018-03-12 10:00:00,234.3,-48.33,110.0,-47.78,84.5,-47.65,97.5,-47.52
2018-03-12 11:00:00,210.6,-48.23,94.2,-47.73,76.4,-47.61,88.3,-47.53
2018-03-12 12:00:00,153.6,-48.02,84.9,-47.72,70.4,-47.59,75.7,-47.55
2018-03-12 13:00:00,142.5,-47.98,93.7,-47.76,75.7,-47.59,82.4,-47.62
2018-03-12 14:00:00,164.3,-48.1,127.9,-47.94,87.4,-47.62,91.2,-47.71
2018-03-12 15:00:00,170.7,-48.15,144.7,-48.03,92.8,-47.66,93.8,-47.76
2018-03-12 16:00:00,160.8,-48.1,140.3,-48.01,91.1,-47.7,100.5,-47.8
2018-03-12 17:00:00,157.8,-48.04,129.9,-47.9,89.7,-47.67,112.1,-47.78
2018-03-12 18:00:00,146.5,-47.97,120.2,-47.84,85.6,-47.67,107.9,-47.76
2018-03-12 19:00:00,118.6,-47.83,106.1,-47.73,69.3,-47.62,85.2,-47.63
2018-03-12 20:00:00,116.0,-47.72,111.0,-47.62,66.0,-47.63,90.7,-47.58
2018-03-12 21:00:00,120.0,-47.72,102.1,-47.6,69.2,-47.64,92.8,-47.6
2018-03-12 22:00:00,113.1,-47.72,89.3,-47.61,68.0,-47.64,86.6,-47.59
2018-03-12 23:00:00,108.9,-47.69,81.2,-47.62,65.5,-47.62,74.3,-47.59
2018-03-13 00:00:00,105.0,-47.69,79.0,-47.59,63.4,-47.6,72.8,-47.59
2018-03-13 01:00:00,96.9,-47.69,68.4,-47.57,58.4,-47.59,64.7,-47.58
2018-03-13 02:00:00,97.9,-47.72,64.9,-47.57,58.4,-47.57,64.5,-47.55
2018-03-13 03:00:00,105.1,-47.74,74.9,-47.59,63.7,-47.59,69.7,-47.58
2018-03-13 04:00:00,119.0,-47.79,99.7,-47.68,72.4,-47.62,82.2,-47.64
2018-03-13 05:00:00,122.5,-47.86,97.6,-47.75,76.2,-47.65,90.9,-47.7
2018-03-13 06:00:00,121.7,-47.9,102.2,-47.82,76.0,-47.66,97.9,-47.74
2018-03-13 07:00:00,124.1,-47.93,121.9,-47.93,75.3,-47.67,101.6,-47.79
2018-03-13 08:00:00,132.1,-47.98,139.4,-48.01,77.0,-47.68,101.9,-47.79
2018-03-13 09:00:00,98.7,-47.87,108.4,-47.92,57.1,-47.62,74.4,-47.72
2018-03-13 10:00:00,80.8,-47.79,90.1,-47.85,46.1,-47.59,62.2,-47.67
2018-03-13 11:00:00,82.6,-47.81,95.6,-47.89,48.3,-47.61,66.6,-47.72
2018-03-13 12:00:00,79.9,-47.81,86.2,-47.86,51.0,-47.63,73.1,-47.78
2018-03-13 13:00:00,76.3,-47.8,90.2,-47.89,53.5,-47.63,80.7,-47.83
2018-03-13 14:00:00,81.6,-47.82,104.7,-47.96,62.9,-47.66,94.3,-47.89
2018-03-13 15:00:00,97.2,-47.9,113.3,-48.01,75.3,-47.72,99.9,-47.92
2018-03-13 16:00:00,116.3,-47.99,129.8,-48.09,93.5,-47.79,111.2,-47.99
2018-03-13 17:00:00,148.8,-48.1,155.5,-48.14,111.4,-47.83,132.7,-48.01
2018-03-13 18:00:00,235.2,-48.39,188.5,-48.17,128.7,-47.83,145.5,-47.82
2018-03-13 19:00:00,314.7,-48.68,212.8,-48.24,158.1,-47.89,170.5,-47.85
2018-03-13 20:00:00,373.3,-48.85,221.2,-48.21,178.2,-47.82,171.4,-47.78
2018-03-13 21:00:00,269.4,-48.47,173.1,-48.0,137.2,-47.62,114.0,-47.58
2018-03-13 22:00:00,316.7,-48.6,176.5,-47.91,151.3,-47.59,122.8,-47.43
2018-03-13 23:00:00,306.0,-48.56,159.3,-47.84,142.7,-47.56,114.1,-47.38
2018-03-14 00:00:00,351.2,-48.71,190.6,-47.93,153.5,-47.57,125.3,-47.34
2018-03-14 01:00:00,420.2,-48.95,237.6,-48.15,168.8,-47.74,150.4,-47.41
2018-03-14 02:00:00,338.6,-48.7,204.8,-48.09,139.2,-47.75,133.0,-47.44
2018-03-14 03:00:00,403.4,-48.89,417.5,-48.82,152.2,-47.76,140.2,-47.3
2018-03-14 04:00:00,401.5,-48.88,567.4,-49.33,145.5,-47.74,125.0,-47.29
2018-03-14 05:00:00,216.4,-48.28,143.8,-47.93,86.9,-47.63,66.0,-47.37
2018-03-14 06:00:00,197.5,-48.22,170.2,-48.09,87.0,-47.65,62.4,-47.51
2018-03-14 07:00:00,206.1,-48.27,192.3,-48.19,96.7,-47.7,73.4,-47.61
2018-03-14 08:00:00,180.9,-48.18,183.6,-48.18,89.9,-47.7,72.0,-47.67
2018-03-14 09:00:00,114.8,-47.93,103.2,-47.88,61.5,-47.63,51.4,-47.62
2018-03-14 10:00:00,61.3,-47.7,46.2,-47.63,34.3,-47.54,29.1,-47.54
2018-03-14 11:00:00,39.6,-47.6,29.9,-47.56,23.1,-47.5,19.8,-47.51
2018-03-14 12:00:00,36.8,-47.58,27.6,-47.54,23.6,-47.5,20.2,-47.52
2018-03-14 13:00:00,43.1,-47.62,37.5,-47.59,28.7,-47.53,25.1,-47.55
2018-03-14 14:00:00,46.8,-47.63,48.3,-47.63,31.8,-47.54,31.0,-47.57
2018-03-14 15:00:00,46.8,-47.63,44.8,-47.61,31.4,-47.53,29.9,-47.56
2018-03-14 16:00:00,53.7,-47.66,68.0,-47.71,34.3,-47.52,38.5,-47.58
2018-03-14 17:00:00,83.4,-47.77,127.0,-47.97,51.5,-47.56,56.3,-47.63
2018-03-14 18:00:00,95.4,-47.83,151.5,-48.09,49.4,-47.57,39.7,-47.55
2018-03-14 19:00:00,94.5,-47.83,160.9,-48.13,46.9,-47.57,37.2,-47.55
2018-03-14 20:00:00,91.6,-47.83,152.8,-48.1,46.7,-47.58,36.9,-47.56
2018-03-14 21:00:00,93.5,-47.83,163.5,-48.14,48.1,-47.59,39.7,-47.58
2018-03-14 22:00:00,99.4,-47.85,172.9,-48.18,49.6,-47.58,41.5,-47.57
2018-03-14 23:00:00,106.8,-47.89,188.4,-48.24,54.1,-47.6,46.7,-47.58
2018-03-15 00:00:00,106.0,-47.89,183.2,-48.23,56.1,-47.61,51.9,-47.61
2018-03-15 01:00:00,106.4,-47.89,170.6,-48.18,59.9,-47.64,55.4,-47.65
2018-03-15 02:00:00,107.8,-47.9,174.8,-48.2,63.0,-47.66,57.9,-47.67
2018-03-15 03:00:00,108.6,-47.9,173.6,-48.2,64.0,-47.65,58.1,-47.67
2018-03-15 04:00:00,101.4,-47.87,138.9,-48.05,61.1,-47.64,57.9,-47.68
2018-03-15 05:00:00,107.0,-47.88,106.9,-47.88,62.8,-47.62,58.5,-47.64
2018-03-15 06:00:00,129.4,-47.97,78.4,-47.71,71.5,-47.63,67.2,-47.6
2018-03-15 07:00:00,141.9,-48.03,93.4,-47.79,76.1,-47.66,71.0,-47.61
2018-03-15 08:00:00,158.6,-48.1,144.8,-48.01,81.7,-47.69,74.9,-47.61
2018-03-15 09:00:00,125.0,-47.97,68.0,-47.7,66.4,-47.65,59.3,-47.59
2018-03-15 10:00:00,95.6,-47.85,48.8,-47.63,51.3,-47.6,47.0,-47.58
2018-03-15 11:00:00,108.1,-47.91,80.8,-47.78,59.0,-47.63,51.4,-47.61
2018-03-15 12:00:00,102.1,-47.89,82.7,-47.8,60.7,-47.66,53.1,-47.66
2018-03-15 13:00:00,87.3,-47.84,51.0,-47.66,54.3,-47.65,50.3,-47.65
2018-03-15 14:00:00,75.5,-47.79,44.7,-47.64,47.5,-47.62,43.2,-47.64
2018-03-15 15:00:00,59.7,-47.7,33.3,-47.58,35.0,-47.56,31.6,-47.58
2018-03-15 16:00:00,60.9,-47.69,33.6,-47.56,33.9,-47.54,29.9,-47.54
2018-03-15 17:00:00,86.7,-47.8,90.8,-47.81,41.9,-47.55,38.9,-47.53
2018-03-15 18:00:00,153.4,-48.06,267.7,-48.5,64.0,-47.6,70.3,-47.58
2018-03-15 19:00:00,254.8,-48.43,496.6,-49.27,99.9,-47.67,99.9,-47.61
2018-03-15 20:00:00,190.8,-48.21,360.6,-48.85,83.6,-47.66,77.7,-47.66
2018-03-15 21:00:00,206.4,-48.27,385.6,-48.93,89.5,-47.67,87.3,-47.67
2018-03-15 22:00:00,207.7,-48.27,389.9,-48.95,90.4,-47.67,82.7,-47.65
2018-03-15 23:00:00,171.6,-48.15,285.2,-48.6,81.5,-47.67,76.8,-47.69
2018-03-16 00:00:00,129.0,-47.98,139.0,-48.03,66.7,-47.64,60.1,-47.66
2018-03-16 01:00:00,87.9,-47.8,46.8,-47.61,45.0,-47.56,35.4,-47.52
2018-03-16 02:00:00,63.4,-47.68,26.6,-47.5,33.5,-47.51,22.3,-47.48
2018-03-16 03:00:00,65.0,-47.7,38.2,-47.56,36.9,-47.52,23.9,-47.5
2018-03-16 04:00:00,64.0,-47.69,39.0,-47.57,39.2,-47.51,27.9,-47.51
2018-03-16 05:00:00,65.9,-47.7,41.4,-47.58,40.3,-47.51,31.9,-47.52
2018-03-16 06:00:00,82.2,-47.78,51.2,-47.62,48.7,-47.55,39.2,-47.55
2018-03-16 07:00:00,99.8,-47.84,56.4,-47.63,54.8,-47.55,40.5,-47.53
2018-03-16 08:00:00,66.5,-47.7,41.9,-47.57,38.0,-47.49,27.9,-47.51
2018-03-16 09:00:00,51.6,-47.63,32.6,-47.54,29.8,-47.47,21.3,-47.49
2018-03-16 10:00:00,43.3,-47.59,24.7,-47.5,25.2,-47.46,14.7,-47.46
2018-03-16 11:00:00,37.3,-47.56,18.5,-47.47,22.3,-47.45,11.9,-47.44
2018-03-16 12:00:00,36.5,-47.56,18.7,-47.47,21.7,-47.45,11.8,-47.45
2018-03-16 13:00:00,43.1,-47.6,25.4,-47.51,25.2,-47.49,16.7,-47.49
2018-03-16 14:00:00,48.2,-47.63,23.3,-47.51,27.8,-47.51,18.8,-47.51
2018-03-16 15:00:00,52.6,-47.64,24.0,-47.5,29.1,-47.51,19.7,-47.49
2018-03-16 16:00:00,57.8,-47.66,27.4,-47.52,29.9,-47.51,21.4,-47.48
2018-03-16 17:00:00,80.1,-47.76,41.5,-47.56,39.8,-47.52,29.5,-47.47
2018-03-16 18:00:00,120.0,-47.92,134.9,-47.96,51.0,-47.56,43.1,-47.47
2018-03-16 19:00:00,165.9,-48.1,181.9,-48.15,67.4,-47.61,56.9,-47.49
2018-03-16 20:00:00,224.4,-48.32,364.1,-48.83,90.3,-47.66,82.9,-47.56
2018-03-16 21:00:00,253.8,-48.42,478.9,-49.21,96.5,-47.66,135.0,-47.8
2018-03-16 22:00:00,126.0,-47.94,214.4,-48.31,52.4,-47.57,93.9,-47.77
2018-03-16 23:00:00,91.8,-47.79,157.0,-48.08,47.4,-47.56,62.2,-47.68
2018-03-17 00:00:00,119.5,-47.87,155.4,-48.03,83.1,-47.65,80.7,-47.72
2018-03-17 01:00:00,149.4,-47.91,164.1,-48.01,121.6,-47.72,100.1,-47.78
2018-03-17 02:00:00,158.5,-47.92,169.8,-47.98,132.5,-47.74,109.5,-47.78
2018-03-17 03:00:00,145.4,-47.88,153.3,-47.93,121.0,-47.71,99.3,-47.76
2018-03-17 04:00:00,118.5,-47.8,129.9,-47.85,93.5,-47.66,83.1,-47.7
2018-03-17 05:00:00,95.9,-47.73,110.3,-47.77,73.4,-47.62,69.1,-47.63
2018-03-17 06:00:00,77.7,-47.67,91.8,-47.7,56.1,-47.58,57.5,-47.58
2018-03-17 07:00:00,63.4,-47.62,68.6,-47.68,43.2,-47.55,41.1,-47.58
2018-03-17 08:00:00,57.7,-47.62,64.4,-47.69,37.8,-47.54,35.9,-47.58
2018-03-17 09:00:00,54.5,-47.62,58.0,-47.67,34.5,-47.53,31.8,-47.57
2018-03-17 10:00:00,50.8,-47.62,53.1,-47.65,31.6,-47.52,29.1,-47.56
2018-03-17 11:00:00,47.3,-47.6,51.1,-47.64,30.3,-47.52,27.8,-47.55
2018-03-17 12:00:00,46.1,-47.6,50.6,-47.64,29.6,-47.52,28.5,-47.55
2018-03-17 13:00:00,43.6,-47.59,45.7,-47.62,27.6,-47.51,26.2,-47.55
2018-03-17 14:00:00,43.1,-47.59,48.0,-47.63,26.6,-47.51,25.6,-47.54
2018-03-17 15:00:00,46.4,-47.6,53.5,-47.65,26.9,-47.51,26.0,-47.53
2018-03-17 16:00:00,47.9,-47.59,55.3,-47.65,27.2,-47.51,27.7,-47.53
2018-03-17 17:00:00,52.7,-47.61,60.6,-47.66,28.6,-47.51,28.2,-47.52
2018-03-17 18:00:00,57.7,-47.63,68.6,-47.69,30.1,-47.51,31.5,-47.52
2018-03-17 19:00:00,60.0,-47.64,70.0,-47.68,32.0,-47.52,33.8,-47.51
2018-03-17 20:00:00,60.6,-47.65,81.0,-47.73,34.5,-47.52,34.9,-47.51
2018-03-17 21:00:00,68.4,-47.67,103.2,-47.83,38.5,-47.52,38.6,-47.51
2018-03-17 22:00:00,74.8,-47.7,118.7,-47.89,41.1,-47.53,41.2,-47.51
2018-03-17 23:00:00,77.0,-47.71,114.4,-47.88,45.3,-47.53,42.4,-47.53
2018-03-18 00:00:00,71.8,-47.69,98.7,-47.81,45.0,-47.53,39.7,-47.54
2018-03-18 01:00:00,73.0,-47.69,101.7,-47.83,46.8,-47.53,41.0,-47.54
2018-03-18 02:00:00,72.3,-47.69,101.3,-47.83,48.4,-47.54,41.9,-47.55
2018-03-18 03:00:00,77.1,-47.71,109.3,-47.86,51.2,-47.55,48.2,-47.57
2018-03-18 04:00:00,83.1,-47.73,117.9,-47.9,53.8,-47.56,51.7,-47.59
2018-03-18 05:00:00,78.6,-47.72,110.3,-47.87,52.2,-47.56,48.3,-47.58
2018-03-18 06:00:00,81.5,-47.73,114.1,-47.89,53.2,-47.56,46.8,-47.57
2018-03-18 07:00:00,78.5,-47.72,106.2,-47.85,51.9,-47.56,44.5,-47.56
2018-03-18 08:00:00,69.4,-47.68,93.7,-47.79,48.6,-47.55,43.5,-47.57
2018-03-18 09:00:00,64.7,-47.66,84.4,-47.75,46.5,-47.55,42.3,-47.56
2018-03-18 10:00:00,61.1,-47.63,78.1,-47.71,43.1,-47.54,41.4,-47.56
2018-03-18 11:00:00,58.0,-47.62,71.9,-47.67,40.6,-47.54,40.4,-47.53
2018-03-18 12:00:00,58.9,-47.62,75.0,-47.67,40.6,-47.54,42.0,-47.53
2018-03-18 13:00:00,59.7,-47.63,80.4,-47.68,40.1,-47.54,43.8,-47.52
2018-03-18 14:00:00,61.5,-47.62,79.0,-47.67,39.6,-47.54,43.8,-47.52
2018-03-18 15:00:00,63.6,-47.62,81.9,-47.69,39.7,-47.54,43.4,-47.51
2018-03-18 16:00:00,65.3,-47.63,90.9,-47.71,40.5,-47.53,45.7,-47.51
2018-03-18 17:00:00,64.5,-47.62,84.4,-47.68,40.8,-47.53,46.2,-47.51
2018-03-18 18:00:00,63.1,-47.63,85.8,-47.68,41.2,-47.53,46.9,-47.5
2018-03-18 19:00:00,67.8,-47.65,93.8,-47.75,43.9,-47.54,46.0,-47.53
2018-03-18 20:00:00,83.8,-47.73,115.1,-47.87,49.1,-47.55,48.2,-47.54
2018-03-18 21:00:00,86.1,-47.74,123.6,-47.91,49.9,-47.54,48.0,-47.53
2018-03-18 22:00:00,69.1,-47.68,97.1,-47.81,44.3,-47.53,40.2,-47.54
2018-03-18 23:00:00,74.9,-47.7,110.4,-47.87,45.7,-47.53,40.8,-47.53
2018-03-19 00:00:00,117.7,-47.86,162.3,-48.05,58.6,-47.57,57.1,-47.52
2018-03-19 01:00:00,118.2,-47.86,141.5,-47.96,55.9,-47.56,56.0,-47.52
2018-03-19 02:00:00,100.1,-47.79,106.6,-47.82,50.2,-47.54,48.5,-47.53
2018-03-19 03:00:00,87.3,-47.74,100.6,-47.8,46.8,-47.54,45.3,-47.52
2018-03-19 04:00:00,93.7,-47.77,118.0,-47.88,48.6,-47.55,47.8,-47.53
2018-03-19 05:00:00,85.4,-47.73,94.3,-47.76,45.6,-47.54,47.6,-47.52
2018-03-19 06:00:00,81.1,-47.69,82.1,-47.69,42.7,-47.54,47.0,-47.51
2018-03-19 07:00:00,79.7,-47.69,79.7,-47.73,41.5,-47.55,40.3,-47.53
2018-03-19 08:00:00,70.0,-47.67,70.0,-47.7,39.1,-47.55,37.9,-47.55
2018-03-19 09:00:00,57.3,-47.61,60.5,-47.67,34.7,-47.54,34.1,-47.55
2018-03-19 10:00:00,48.7,-47.6,56.2,-47.66,32.0,-47.53,30.4,-47.55
2018-03-19 11:00:00,41.9,-47.58,51.4,-47.64,29.0,-47.52,28.2,-47.54
2018-03-19 12:00:00,40.4,-47.58,48.8,-47.63,27.8,-47.51,27.2,-47.53
2018-03-19 13:00:00,39.8,-47.58,47.7,-47.62,26.8,-47.51,25.5,-47.53
2018-03-19 14:00:00,41.1,-47.58,51.2,-47.64,28.5,-47.51,26.4,-47.53
2018-03-19 15:00:00,39.1,-47.58,46.6,-47.62,25.8,-47.5,24.9,-47.52
2018-03-19 16:00:00,40.6,-47.58,45.4,-47.61,25.5,-47.5,23.3,-47.51
2018-03-19 17:00:00,44.8,-47.6,53.7,-47.65,25.6,-47.5,24.4,-47.51
2018-03-19 18:00:00,50.1,-47.62,57.8,-47.66,24.9,-47.49,25.2,-47.49
2018-03-19 19:00:00,53.7,-47.62,59.2,-47.65,24.9,-47.49,26.8,-47.48
2018-03-19 20:00:00,59.1,-47.63,64.3,-47.65,25.7,-47.48,29.0,-47.47
2018-03-19 21:00:00,68.0,-47.65,74.3,-47.67,28.0,-47.48,34.4,-47.46
2018-03-19 22:00:00,92.9,-47.71,100.5,-47.73,34.3,-47.47,50.7,-47.45
2018-03-19 23:00:00,112.0,-47.79,117.0,-47.79,39.3,-47.47,58.1,-47.42
2018-03-20 00:00:00,133.9,-47.88,132.8,-47.86,44.0,-47.47,62.5,-47.41
2018-03-20 01:00:00,150.9,-47.96,120.3,-47.79,45.9,-47.48,61.9,-47.35
2018-03-20 02:00:00,161.2,-48.0,73.5,-47.58,46.4,-47.5,52.1,-47.33
2018-03-20 03:00:00,164.7,-48.02,65.4,-47.55,48.2,-47.5,46.9,-47.36
2018-03-20 04:00:00,116.9,-47.85,51.0,-47.54,38.7,-47.47,36.7,-47.39
2018-03-20 05:00:00,89.2,-47.76,36.9,-47.51,31.4,-47.47,28.6,-47.41
2018-03-20 06:00:00,88.0,-47.76,39.1,-47.52,34.3,-47.48,32.3,-47.42
2018-03-20 07:00:00,84.0,-47.75,40.7,-47.56,34.3,-47.48,32.6,-47.49
2018-03-20 08:00:00,65.9,-47.67,35.4,-47.54,28.2,-47.47,26.3,-47.48
2018-03-20 09:00:00,50.7,-47.6,31.9,-47.51,22.0,-47.45,22.2,-47.44
2018-03-20 10:00:00,34.4,-47.52,24.2,-47.47,14.8,-47.42,15.8,-47.4
2018-03-20 11:00:00,21.7,-47.48,17.3,-47.45,7.7,-47.41,9.6,-47.39
2018-03-20 12:00:00,20.2,-47.47,15.2,-47.45,6.9,-47.41,8.2,-47.4
2018-03-20 13:00:00,20.5,-47.47,16.4,-47.45,7.1,-47.42,8.5,-47.41
2018-03-20 14:00:00,22.6,-47.48,16.5,-47.45,8.1,-47.42,9.5,-47.41
2018-03-20 15:00:00,24.6,-47.49,15.1,-47.44,8.9,-47.42,9.2,-47.4
2018-03-20 16:00:00,28.3,-47.5,16.7,-47.45,9.7,-47.42,9.4,-47.4
2018-03-20 17:00:00,40.3,-47.56,20.2,-47.46,12.9,-47.43,13.5,-47.39
2018-03-20 18:00:00,76.6,-47.71,32.2,-47.48,22.4,-47.45,22.9,-47.36
2018-03-20 19:00:00,176.7,-48.09,78.4,-47.61,48.0,-47.5,50.8,-47.29
2018-03-20 20:00:00,193.9,-48.15,90.2,-47.66,50.3,-47.5,56.6,-47.29
2018-03-20 21:00:00,184.0,-48.11,113.9,-47.78,49.2,-47.5,60.3,-47.32
2018-03-20 22:00:00,254.5,-48.36,140.5,-47.82,68.3,-47.53,79.5,-47.25
2018-03-20 23:00:00,306.0,-48.52,125.4,-47.69,82.2,-47.56,87.8,-47.19
2018-03-21 00:00:00,343.0,-48.62,126.2,-47.62,100.6,-47.56,105.1,-47.06
2018-03-21 01:00:00,273.5,-48.38,107.0,-47.56,95.4,-47.52,104.4,-47.07
2018-03-21 02:00:00,299.5,-48.46,117.5,-47.58,103.3,-47.57,110.3,-47.08
2018-03-21 03:00:00,358.8,-48.65,154.3,-47.64,130.0,-47.57,144.6,-46.94
2018-03-21 04:00:00,350.2,-48.6,189.9,-47.75,143.8,-47.48,165.4,-47.02
2018-03-21 05:00:00,367.1,-48.61,263.4,-48.0,179.8,-47.33,220.0,-47.35
2018-03-21 06:00:00,359.8,-48.6,327.9,-48.33,199.1,-47.46,238.8,-47.63
2018-03-21 07:00:00,335.6,-48.55,350.7,-48.49,196.0,-47.59,260.5,-47.9
2018-03-21 08:00:00,266.3,-48.37,308.0,-48.42,159.4,-47.68,222.4,-47.94
2018-03-21 09:00:00,184.7,-48.13,221.3,-48.23,123.3,-47.69,179.9,-47.97
2018-03-21 10:00:00,99.1,-47.84,109.8,-47.91,70.2,-47.62,85.4,-47.74
2018-03-21 11:00:00,64.6,-47.72,76.1,-47.79,46.0,-47.57,60.0,-47.7
2018-03-21 12:00:00,52.7,-47.66,69.0,-47.76,40.5,-47.56,53.9,-47.7
2018-03-21 13:00:00,47.0,-47.63,64.9,-47.74,38.3,-47.55,53.8,-47.7
2018-03-21 14:00:00,42.4,-47.6,55.0,-47.68,34.9,-47.53,48.4,-47.66
2018-03-21 15:00:00,48.1,-47.63,62.4,-47.72,38.6,-47.55,53.3,-47.68
2018-03-21 16:00:00,56.0,-47.68,74.1,-47.8,43.1,-47.58,58.3,-47.73
2018-03-21 17:00:00,62.8,-47.72,73.3,-47.8,47.4,-47.6,58.2,-47.74
2018-03-21 18:00:00,76.4,-47.76,84.0,-47.81,54.8,-47.61,72.8,-47.76
2018-03-21 19:00:00,98.8,-47.82,104.9,-47.84,74.3,-47.61,99.3,-47.75
2018-03-21 20:00:00,103.4,-47.84,113.4,-47.87,85.2,-47.65,105.6,-47.8
2018-03-21 21:00:00,116.9,-47.9,127.5,-47.94,93.6,-47.68,120.9,-47.85
2018-03-21 22:00:00,129.1,-47.95,144.2,-48.0,102.6,-47.7,135.4,-47.9
2018-03-21 23:00:00,131.7,-47.95,148.1,-48.01,106.3,-47.7,126.6,-47.85
2018-03-22 00:00:00,123.1,-47.91,132.7,-47.94,101.4,-47.68,123.7,-47.86
2018-03-22 01:00:00,119.3,-47.89,129.6,-47.92,99.2,-47.68,120.1,-47.83
2018-03-22 02:00:00,120.1,-47.89,131.6,-47.92,97.3,-47.66,124.8,-47.84
2018-03-22 03:00:00,127.8,-47.92,133.8,-47.92,101.7,-47.66,120.6,-47.8
2018-03-22 04:00:00,131.2,-47.93,140.3,-47.93,109.3,-47.68,117.5,-47.78
2018-03-22 05:00:00,130.7,-47.92,134.0,-47.9,114.0,-47.7,113.0,-47.75
2018-03-22 06:00:00,146.1,-47.98,146.7,-47.93,121.1,-47.68,131.9,-47.77
2018-03-22 07:00:00,140.0,-47.95,155.8,-47.99,116.4,-47.68,156.5,-47.88
2018-03-22 08:00:00,113.9,-47.87,135.0,-47.95,95.4,-47.67,123.3,-47.82
2018-03-22 09:00:00,87.0,-47.78,106.4,-47.87,69.8,-47.63,87.8,-47.75
2018-03-22 10:00:00,69.2,-47.71,89.1,-47.81,54.4,-47.59,67.7,-47.69
2018-03-22 11:00:00,55.1,-47.64,68.4,-47.72,45.1,-47.56,52.5,-47.64
2018-03-22 12:00:00,44.0,-47.59,51.5,-47.63,36.2,-47.52,40.7,-47.57
2018-03-22 13:00:00,42.2,-47.58,42.5,-47.58,35.8,-47.52,35.1,-47.57
2018-03-22 14:00:00,41.0,-47.59,38.1,-47.57,35.0,-47.52,35.0,-47.59
2018-03-22 15:00:00,40.1,-47.58,35.8,-47.57,35.0,-47.53,34.7,-47.58
2018-03-22 16:00:00,43.5,-47.6,40.0,-47.59,39.4,-47.55,36.2,-47.59
2018-03-22 17:00:00,46.1,-47.6,42.4,-47.59,40.7,-47.55,33.6,-47.56
2018-03-22 18:00:00,45.9,-47.59,43.0,-47.57,40.7,-47.53,28.2,-47.52
2018-03-22 19:00:00,42.5,-47.56,37.5,-47.53,35.6,-47.5,24.8,-47.48
2018-03-22 20:00:00,45.5,-47.57,33.8,-47.51,34.9,-47.48,24.6,-47.48
2018-03-22 21:00:00,47.4,-47.58,31.2,-47.5,30.2,-47.45,19.5,-47.43
2018-03-22 22:00:00,59.1,-47.63,36.9,-47.52,34.9,-47.45,21.3,-47.42
2018-03-22 23:00:00,59.9,-47.64,37.6,-47.54,35.1,-47.45,19.5,-47.42
2018-03-23 00:00:00,62.3,-47.66,38.8,-47.55,35.3,-47.46,18.1,-47.43
2018-03-23 01:00:00,64.4,-47.67,39.4,-47.55,36.6,-47.47,16.8,-47.42
2018-03-23 02:00:00,64.3,-47.68,45.2,-47.6,37.7,-47.5,19.2,-47.48
2018-03-23 03:00:00,68.2,-47.73,55.9,-47.68,42.8,-47.55,24.5,-47.58
2018-03-23 04:00:00,67.8,-47.73,57.2,-47.69,43.5,-47.57,26.6,-47.58
2018-03-23 05:00:00,69.1,-47.74,56.5,-47.7,44.6,-47.58,28.4,-47.59
2018-03-23 06:00:00,64.7,-47.72,53.5,-47.68,41.7,-47.56,25.0,-47.56
2018-03-23 07:00:00,66.5,-47.7,46.4,-47.61,39.2,-47.52,22.8,-47.5
2018-03-23 08:00:00,65.0,-47.68,38.3,-47.54,37.9,-47.48,24.6,-47.46
2018-03-23 09:00:00,39.1,-47.56,24.0,-47.49,29.1,-47.47,19.5,-47.47
2018-03-23 10:00:00,28.9,-47.52,19.6,-47.48,23.5,-47.46,17.3,-47.49
2018-03-23 11:00:00,28.6,-47.52,21.1,-47.49,24.8,-47.48,17.3,-47.5
2018-03-23 12:00:00,28.5,-47.53,20.6,-47.49,25.1,-47.48,17.9,-47.51
2018-03-23 13:00:00,34.0,-47.55,24.6,-47.51,27.0,-47.49,21.3,-47.53
2018-03-23 14:00:00,35.1,-47.56,23.9,-47.5,25.1,-47.48,19.4,-47.52
2018-03-23 15:00:00,34.7,-47.55,21.1,-47.49,23.3,-47.47,16.3,-47.5
2018-03-23 16:00:00,40.0,-47.57,21.0,-47.48,23.0,-47.45,13.2,-47.47
2018-03-23 17:00:00,45.9,-47.59,25.3,-47.49,24.7,-47.45,14.4,-47.46
2018-03-23 18:00:00,56.5,-47.64,23.8,-47.47,27.1,-47.46,16.8,-47.44
2018-03-23 19:00:00,64.8,-47.67,27.9,-47.48,29.6,-47.47,19.3,-47.42
2018-03-23 20:00:00,76.3,-47.73,33.7,-47.51,37.1,-47.49,24.9,-47.46
2018-03-23 21:00:00,85.6,-47.78,41.6,-47.56,41.7,-47.53,30.3,-47.5
2018-03-23 22:00:00,95.7,-47.81,58.6,-47.63,41.2,-47.52,32.8,-47.45
2018-03-23 23:00:00,110.8,-47.88,170.0,-48.13,47.7,-47.54,33.5,-47.49
2018-03-24 00:00:00,126.8,-47.95,231.1,-48.38,56.6,-47.57,38.0,-47.5
2018-03-24 01:00:00,148.0,-48.03,266.7,-48.51,67.8,-47.61,43.4,-47.53
2018-03-24 02:00:00,140.2,-48.0,236.4,-48.4,65.5,-47.61,42.0,-47.54
2018-03-24 03:00:00,116.9,-47.9,197.1,-48.24,57.5,-47.58,36.6,-47.53
2018-03-24 04:00:00,119.1,-47.91,202.8,-48.26,60.4,-47.59,40.6,-47.54
2018-03-24 05:00:00,129.1,-47.94,219.9,-48.32,66.8,-47.6,47.3,-47.56
2018-03-24 06:00:00,139.4,-47.98,244.3,-48.38,76.1,-47.61,71.1,-47.63
2018-03-24 07:00:00,148.6,-48.02,253.0,-48.42,86.3,-47.64,91.7,-47.72
2018-03-24 08:00:00,153.0,-48.05,247.2,-48.42,91.9,-47.67,91.8,-47.74
2018-03-24 09:00:00,149.1,-48.03,227.9,-48.35,89.1,-47.67,81.2,-47.71
2018-03-24 10:00:00,141.1,-48.0,221.6,-48.33,82.4,-47.66,77.4,-47.69
2018-03-24 11:00:00,138.1,-47.99,219.2,-48.33,78.4,-47.65,70.9,-47.67
2018-03-24 12:00:00,131.2,-47.96,211.7,-48.3,73.1,-47.63,67.7,-47.65
2018-03-24 13:00:00,134.5,-47.98,218.4,-48.32,71.6,-47.63,70.5,-47.65
2018-03-24 14:00:00,143.8,-48.01,232.8,-48.37,72.5,-47.63,75.2,-47.63
2018-03-24 15:00:00,159.4,-48.07,220.2,-48.3,76.5,-47.63,82.1,-47.61
2018-03-24 16:00:00,165.1,-48.08,170.0,-48.09,74.0,-47.63,88.2,-47.62
2018-03-24 17:00:00,171.8,-48.1,127.6,-47.91,71.7,-47.63,87.4,-47.63
2018-03-24 18:00:00,188.7,-48.16,116.2,-47.86,74.2,-47.63,87.3,-47.63
2018-03-24 19:00:00,218.5,-48.27,125.0,-47.88,80.9,-47.65,89.0,-47.61
2018-03-24 20:00:00,227.8,-48.3,140.8,-47.94,84.9,-47.65,89.6,-47.59
2018-03-24 21:00:00,247.9,-48.37,188.2,-48.13,92.8,-47.67,97.3,-47.57
2018-03-24 22:00:00,262.2,-48.42,200.0,-48.17,96.3,-47.68,102.9,-47.57
2018-03-24 23:00:00,271.0,-48.45,145.1,-47.93,97.3,-47.68,98.4,-47.57
2018-03-25 00:00:00,242.4,-48.35,137.4,-47.92,91.8,-47.67,87.7,-47.58
2018-03-25 01:00:00,254.6,-48.4,164.2,-48.03,96.7,-47.69,99.5,-47.61
2018-03-25 02:00:00,275.3,-48.47,175.7,-48.07,102.5,-47.71,109.1,-47.63
2018-03-25 03:00:00,246.5,-48.38,148.2,-47.97,95.6,-47.69,95.8,-47.64
2018-03-25 04:00:00,186.3,-48.17,109.6,-47.83,80.5,-47.65,74.4,-47.61
2018-03-25 05:00:00,168.4,-48.11,101.8,-47.81,74.1,-47.63,70.2,-47.62
2018-03-25 06:00:00,173.2,-48.13,105.0,-47.83,77.7,-47.66,75.1,-47.67
2018-03-25 07:00:00,165.8,-48.1,109.4,-47.85,78.7,-47.68,71.9,-47.66
2018-03-25 08:00:00,159.7,-48.07,131.6,-47.96,75.8,-47.67,75.3,-47.67
2018-03-25 09:00:00,132.9,-47.97,103.1,-47.84,67.5,-47.64,68.8,-47.67
2018-03-25 10:00:00,101.6,-47.84,73.0,-47.71,51.4,-47.58,49.7,-47.6
2018-03-25 11:00:00,72.8,-47.71,57.2,-47.64,34.5,-47.51,35.1,-47.52
2018-03-25 12:00:00,58.3,-47.65,43.4,-47.58,26.3,-47.48,26.7,-47.49
2018-03-25 13:00:00,54.2,-47.63,43.0,-47.58,25.2,-47.48,25.2,-47.49
2018-03-25 14:00:00,53.0,-47.63,44.2,-47.59,25.1,-47.48,25.5,-47.5
2018-03-25 15:00:00,52.6,-47.63,36.9,-47.56,24.4,-47.48,23.9,-47.5
2018-03-25 16:00:00,59.0,-47.66,37.5,-47.56,26.6,-47.49,26.8,-47.51
2018-03-25 17:00:00,80.5,-47.74,49.3,-47.6,35.0,-47.52,36.1,-47.54
2018-03-25 18:00:00,119.2,-47.88,77.1,-47.7,47.9,-47.56,47.8,-47.52
2018-03-25 19:00:00,232.4,-48.3,206.3,-48.14,82.3,-47.63,80.5,-47.38
2018-03-25 20:00:00,343.4,-48.67,216.1,-48.06,119.1,-47.68,117.8,-47.17
2018-03-25 21:00:00,346.8,-48.61,167.5,-47.73,139.5,-47.51,142.5,-47.02
2018-03-25 22:00:00,329.0,-48.49,174.3,-47.74,151.7,-47.41,178.8,-47.2
2018-03-25 23:00:00,287.2,-48.41,164.9,-47.83,129.7,-47.61,175.3,-47.44
2018-03-26 00:00:00,291.2,-48.48,150.5,-47.83,123.7,-47.68,146.1,-47.34
2018-03-26 01:00:00,321.1,-48.59,146.7,-47.83,124.8,-47.72,130.5,-47.37
2018-03-26 02:00:00,347.9,-48.67,153.0,-47.83,131.3,-47.73,140.0,-47.33
2018-03-26 03:00:00,349.6,-48.65,157.9,-47.83,138.4,-47.7,153.7,-47.27
2018-03-26 04:00:00,291.8,-48.48,139.0,-47.81,118.2,-47.69,135.6,-47.37
2018-03-26 05:00:00,237.8,-48.31,121.2,-47.79,100.9,-47.66,118.2,-47.43
2018-03-26 06:00:00,202.4,-48.19,108.1,-47.78,90.8,-47.66,110.1,-47.49
2018-03-26 07:00:00,188.5,-48.14,110.1,-47.81,88.2,-47.66,111.1,-47.56
2018-03-26 08:00:00,147.1,-47.99,93.4,-47.77,70.4,-47.63,90.5,-47.59
2018-03-26 09:00:00,81.7,-47.75,64.2,-47.68,43.2,-47.56,58.0,-47.59
2018-03-26 10:00:00,70.1,-47.7,61.6,-47.67,39.0,-47.54,52.0,-47.58
2018-03-26 11:00:00,54.0,-47.64,52.2,-47.63,31.6,-47.51,40.6,-47.55
2018-03-26 12:00:00,41.1,-47.58,42.4,-47.59,24.9,-47.48,32.4,-47.53
2018-03-26 13:00:00,43.5,-47.59,45.0,-47.6,27.4,-47.48,37.6,-47.55
2018-03-26 14:00:00,44.2,-47.6,50.3,-47.63,30.8,-47.49,39.7,-47.56
2018-03-26 15:00:00,43.9,-47.6,46.8,-47.61,32.4,-47.5,36.0,-47.54
2018-03-26 16:00:00,39.0,-47.57,41.5,-47.59,30.0,-47.49,37.3,-47.56
2018-03-26 17:00:00,44.3,-47.6,40.5,-47.58,33.4,-47.5,35.1,-47.54
2018-03-26 18:00:00,74.4,-47.72,50.0,-47.59,47.4,-47.52,43.2,-47.49
2018-03-26 19:00:00,161.0,-48.04,98.2,-47.71,94.9,-47.51,82.1,-47.5
2018-03-26 20:00:00,150.8,-48.03,110.0,-47.83,100.0,-47.6,90.7,-47.67
2018-03-26 21:00:00,165.9,-48.08,111.4,-47.79,102.6,-47.57,91.8,-47.59
2018-03-26 22:00:00,183.2,-48.13,118.7,-47.79,103.8,-47.52,91.6,-47.53
2018-03-26 23:00:00,182.4,-48.13,119.4,-47.79,97.3,-47.48,82.2,-47.5
2018-03-27 00:00:00,149.5,-48.0,99.3,-47.73,79.3,-47.46,65.9,-47.48
2018-03-27 01:00:00,72.1,-47.7,45.8,-47.56,42.8,-47.45,36.6,-47.47
2018-03-27 02:00:00,45.0,-47.6,34.9,-47.55,27.0,-47.47,23.1,-47.49
2018-03-27 03:00:00,55.6,-47.64,30.1,-47.51,27.8,-47.47,23.8,-47.47
2018-03-27 04:00:00,65.3,-47.68,30.2,-47.51,30.0,-47.48,26.0,-47.44
2018-03-27 05:00:00,70.8,-47.71,31.2,-47.52,34.3,-47.51,30.9,-47.48
2018-03-27 06:00:00,68.5,-47.71,37.4,-47.56,36.4,-47.52,37.6,-47.54
2018-03-27 07:00:00,75.9,-47.74,52.9,-47.64,41.5,-47.55,48.2,-47.59
2018-03-27 08:00:00,86.7,-47.8,61.0,-47.67,46.2,-47.57,50.9,-47.61
2018-03-27 09:00:00,125.3,-47.97,76.9,-47.73,62.9,-47.64,67.0,-47.64
2018-03-27 10:00:00,137.5,-48.02,83.2,-47.75,72.3,-47.65,70.9,-47.62
2018-03-27 11:00:00,103.1,-47.86,81.9,-47.74,73.2,-47.6,66.7,-47.63
2018-03-27 12:00:00,100.6,-47.84,90.2,-47.76,76.6,-47.61,84.1,-47.68
2018-03-27 13:00:00,85.8,-47.75,66.2,-47.63,56.7,-47.52,60.5,-47.53
2018-03-27 14:00:00,58.0,-47.64,56.2,-47.62,45.7,-47.52,48.4,-47.55
2018-03-27 15:00:00,57.4,-47.66,63.0,-47.69,44.9,-47.56,53.2,-47.63
2018-03-27 16:00:00,48.1,-47.62,45.3,-47.62,30.9,-47.5,42.8,-47.59
2018-03-27 17:00:00,43.1,-47.59,34.3,-47.55,24.3,-47.47,34.1,-47.52
2018-03-27 18:00:00,54.4,-47.63,36.0,-47.54,29.9,-47.47,39.8,-47.51
2018-03-27 19:00:00,56.8,-47.65,38.2,-47.56,32.4,-47.47,40.3,-47.52
2018-03-27 20:00:00,71.0,-47.7,47.3,-47.58,40.2,-47.47,45.9,-47.52
2018-03-27 21:00:00,91.9,-47.79,87.4,-47.75,59.3,-47.52,83.3,-47.64
2018-03-27 22:00:00,101.6,-47.82,110.5,-47.84,80.5,-47.6,102.5,-47.72
2018-03-27 23:00:00,106.1,-47.84,103.8,-47.79,83.2,-47.6,100.1,-47.69
2018-03-28 00:00:00,118.6,-47.87,108.0,-47.78,88.5,-47.58,108.8,-47.69
2018-03-28 01:00:00,120.0,-47.87,110.4,-47.79,92.0,-47.57,95.7,-47.63
2018-03-28 02:00:00,115.4,-47.86,104.7,-47.77,100.3,-47.6,75.8,-47.55
2018-03-28 03:00:00,108.9,-47.84,94.9,-47.73,92.3,-47.6,78.7,-47.57
2018-03-28 04:00:00,106.5,-47.83,93.7,-47.73,86.7,-47.58,80.5,-47.58
2018-03-28 05:00:00,100.1,-47.81,86.3,-47.7,74.5,-47.56,77.1,-47.58
2018-03-28 06:00:00,88.5,-47.77,71.1,-47.65,60.1,-47.54,63.9,-47.56
2018-03-28 07:00:00,88.5,-47.77,73.6,-47.66,53.8,-47.52,54.8,-47.5
2018-03-28 08:00:00,105.2,-47.83,97.7,-47.75,52.3,-47.51,57.2,-47.46
2018-03-28 09:00:00,120.9,-47.89,141.7,-47.93,54.9,-47.52,64.4,-47.44
2018-03-28 10:00:00,84.8,-47.73,77.6,-47.65,48.1,-47.44,61.3,-47.46
2018-03-28 11:00:00,62.0,-47.64,78.1,-47.69,49.0,-47.47,86.9,-47.68
2018-03-28 12:00:00,66.4,-47.7,64.7,-47.7,37.7,-47.52,54.4,-47.61
2018-03-28 13:00:00,87.7,-47.82,90.6,-47.85,43.8,-47.58,56.0,-47.64
2018-03-28 14:00:00,102.8,-47.85,114.9,-47.87,53.1,-47.61,66.6,-47.67
2018-03-28 15:00:00,76.0,-47.74,87.7,-47.79,44.1,-47.56,58.6,-47.64
2018-03-28 16:00:00,68.2,-47.71,67.1,-47.7,40.0,-47.51,51.7,-47.57
2018-03-28 17:00:00,68.3,-47.71,57.0,-47.64,40.3,-47.51,53.2,-47.54
2018-03-28 18:00:00,78.8,-47.76,61.2,-47.66,44.5,-47.52,53.8,-47.54
2018-03-28 19:00:00,95.8,-47.81,73.0,-47.68,51.4,-47.51,63.0,-47.51
2018-03-28 20:00:00,126.0,-47.92,105.0,-47.79,71.2,-47.51,94.8,-47.58
2018-03-28 21:00:00,128.3,-47.91,141.8,-47.94,88.0,-47.53,98.3,-47.61
2018-03-28 22:00:00,132.5,-47.94,143.9,-47.95,107.2,-47.62,129.6,-47.8
2018-03-28 23:00:00,115.7,-47.88,122.7,-47.88,94.1,-47.63,116.8,-47.79
2018-03-29 00:00:00,101.1,-47.82,108.5,-47.83,82.2,-47.61,106.4,-47.76
2018-03-29 01:00:00,104.9,-47.83,108.1,-47.81,80.5,-47.59,109.5,-47.74
2018-03-29 02:00:00,119.9,-47.88,112.4,-47.8,100.2,-47.6,92.7,-47.63
2018-03-29 03:00:00,142.5,-47.97,93.2,-47.68,106.5,-47.56,77.2,-47.5
2018-03-29 04:00:00,200.3,-48.2,104.8,-47.69,110.2,-47.57,94.3,-47.47
2018-03-29 05:00:00,325.9,-48.64,155.7,-47.84,136.2,-47.6,122.0,-47.39
2018-03-29 06:00:00,370.4,-48.79,222.6,-48.12,140.9,-47.67,136.2,-47.42
2018-03-29 07:00:00,252.3,-48.4,165.7,-47.99,100.5,-47.63,104.0,-47.48
2018-03-29 08:00:00,149.7,-48.02,91.8,-47.75,68.0,-47.57,65.9,-47.48
2018-03-29 09:00:00,65.1,-47.68,29.3,-47.51,31.7,-47.49,28.5,-47.46
2018-03-29 10:00:00,45.2,-47.61,21.5,-47.49,22.0,-47.48,20.7,-47.48
2018-03-29 11:00:00,42.1,-47.59,23.4,-47.5,22.0,-47.47,20.4,-47.46
2018-03-29 12:00:00,43.5,-47.61,28.7,-47.55,26.7,-47.52,29.0,-47.53
2018-03-29 13:00:00,45.5,-47.63,30.3,-47.56,28.9,-47.53,29.8,-47.54
2018-03-29 14:00:00,50.5,-47.64,32.2,-47.55,29.3,-47.52,27.7,-47.51
2018-03-29 15:00:00,55.8,-47.65,27.0,-47.51,29.0,-47.5,27.4,-47.47
2018-03-29 16:00:00,63.6,-47.68,27.8,-47.5,30.7,-47.5,28.2,-47.45
2018-03-29 17:00:00,69.1,-47.71,32.9,-47.53,33.4,-47.51,30.2,-47.46
2018-03-29 18:00:00,68.5,-47.7,34.5,-47.53,33.8,-47.51,29.5,-47.45
2018-03-29 19:00:00,96.9,-47.82,46.7,-47.56,44.1,-47.52,37.1,-47.43
2018-03-29 20:00:00,119.3,-47.91,55.5,-47.59,52.7,-47.55,45.4,-47.46
2018-03-29 21:00:00,144.2,-48.01,58.4,-47.59,61.1,-47.57,56.0,-47.45
2018-03-29 22:00:00,172.9,-48.12,84.2,-47.7,71.5,-47.6,60.2,-47.41
2018-03-29 23:00:00,212.6,-48.27,97.9,-47.74,87.8,-47.64,71.1,-47.4
2018-03-30 00:00:00,264.7,-48.46,99.7,-47.71,108.9,-47.69,94.0,-47.42
2018-03-30 01:00:00,261.4,-48.45,110.9,-47.76,107.9,-47.69,95.6,-47.45
2018-03-30 02:00:00,255.4,-48.43,128.8,-47.85,105.8,-47.69,92.4,-47.44
2018-03-30 03:00:00,220.1,-48.3,106.8,-47.76,91.0,-47.64,82.9,-47.46
2018-03-30 04:00:00,216.8,-48.3,110.9,-47.78,89.3,-47.65,82.7,-47.49
2018-03-30 05:00:00,263.1,-48.47,263.1,-48.41,107.4,-47.7,99.3,-47.51
2018-03-30 06:00:00,309.2,-48.61,682.9,-49.77,118.0,-47.71,108.6,-47.51
2018-03-30 07:00:00,240.8,-48.36,430.2,-49.04,87.3,-47.62,130.5,-47.7
2018-03-30 08:00:00,165.8,-48.1,282.6,-48.54,64.0,-47.58,101.0,-47.73
2018-03-30 09:00:00,131.2,-47.95,246.2,-48.42,53.7,-47.56,68.5,-47.61
2018-03-30 10:00:00,110.1,-47.86,214.3,-48.3,44.3,-47.52,57.7,-47.57
2018-03-30 11:00:00,111.3,-47.87,203.0,-48.26,44.3,-47.52,76.0,-47.66
2018-03-30 12:00:00,90.1,-47.78,164.9,-48.09,46.1,-47.53,71.2,-47.65
2018-03-30 13:00:00,96.4,-47.79,163.2,-48.07,58.7,-47.55,81.9,-47.69
2018-03-30 14:00:00,96.0,-47.78,151.5,-48.01,56.9,-47.54,74.9,-47.64
2018-03-30 15:00:00,93.3,-47.77,137.5,-47.96,58.1,-47.56,61.2,-47.57
2018-03-30 16:00:00,92.3,-47.74,134.7,-47.91,61.1,-47.55,73.5,-47.61
2018-03-30 17:00:00,100.0,-47.77,160.5,-48.02,62.4,-47.55,73.4,-47.61
2018-03-30 18:00:00,109.8,-47.87,104.3,-47.83,61.7,-47.58,59.9,-47.56
2018-03-30 19:00:00,96.9,-47.81,62.3,-47.63,55.9,-47.55,53.5,-47.53
2018-03-30 20:00:00,105.6,-47.85,63.0,-47.63,57.8,-47.56,54.4,-47.53
2018-03-30 21:00:00,114.1,-47.88,83.3,-47.71,63.6,-47.55,59.6,-47.54
2018-03-30 22:00:00,115.4,-47.88,87.7,-47.72,71.5,-47.54,67.0,-47.56
2018-03-30 23:00:00,116.6,-47.87,88.1,-47.7,74.8,-47.54,74.8,-47.56
2018-03-31 00:00:00,126.4,-47.91,97.2,-47.74,78.2,-47.54,81.5,-47.59
2018-03-31 01:00:00,128.1,-47.93,101.4,-47.78,77.9,-47.54,78.5,-47.61
2018-03-31 02:00:00,123.4,-47.91,94.6,-47.75,72.2,-47.55,77.6,-47.61
2018-03-31 03:00:00,143.3,-47.98,107.1,-47.79,79.7,-47.54,82.8,-47.61
2018-03-31 04:00:00,144.4,-48.0,111.5,-47.82,79.7,-47.56,84.5,-47.62
2018-03-31 05:00:00,130.8,-47.93,103.0,-47.79,75.7,-47.56,78.9,-47.61
2018-03-31 06:00:00,128.9,-47.91,102.0,-47.78,76.0,-47.58,80.7,-47.64
2018-03-31 07:00:00,130.5,-47.92,112.4,-47.83,80.6,-47.61,86.0,-47.68
2018-03-31 08:00:00,132.9,-47.93,119.5,-47.84,85.9,-47.63,93.1,-47.71
2018-03-31 09:00:00,127.4,-47.89,110.7,-47.78,84.9,-47.63,92.8,-47.7
2018-03-31 10:00:00,136.7,-47.92,117.6,-47.79,92.8,-47.66,100.8,-47.72
2018-03-31 11:00:00,154.4,-47.98,128.3,-47.83,106.1,-47.67,111.9,-47.75
2018-03-31 12:00:00,152.9,-47.97,129.4,-47.83,107.2,-47.67,117.2,-47.74
2018-03-31 13:00:00,150.5,-47.95,132.2,-47.84,109.1,-47.68,125.0,-47.75
2018-03-31 14:00:00,147.2,-47.94,132.4,-47.86,108.3,-47.68,122.4,-47.76
2018-03-31 15:00:00,130.0,-47.89,116.8,-47.81,89.8,-47.64,102.7,-47.67
2018-03-31 16:00:00,126.2,-47.9,114.7,-47.82,78.6,-47.63,93.8,-47.68
2018-03-31 17:00:00,112.2,-47.85,92.9,-47.73,68.9,-47.64,83.7,-47.67
2018-03-31 18:00:00,92.7,-47.81,75.4,-47.71,57.5,-47.61,68.6,-47.65
2018-03-31 19:00:00,80.0,-47.76,66.6,-47.69,50.9,-47.59,56.1,-47.61
2018-03-31 20:00:00,98.6,-47.77,81.4,-47.7,65.1,-47.62,73.0,-47.64
2018-03-31 21:00:00,106.8,-47.79,88.3,-47.71,71.2,-47.65,77.9,-47.66
2018-03-31 22:00:00,105.0,-47.77,82.3,-47.69,69.7,-47.64,70.7,-47.64
2018-03-31 23:00:00,105.2,-47.77,80.0,-47.68,70.1,-47.63,69.0,-47.63
2018-04-01 00:00:00,104.1,-47.79,75.0,-47.68,70.1,-47.63,64.1,-47.67
2018-04-01 01:00:00,102.3,-47.78,70.2,-47.66,69.0,-47.62,61.1,-47.66
2018-04-01 02:00:00,107.6,-47.79,69.6,-47.65,71.3,-47.63,62.0,-47.67
2018-04-01 03:00:00,113.8,-47.78,75.2,-47.63,72.6,-47.63,65.9,-47.67
2018-04-01 04:00:00,120.5,-47.8,83.5,-47.61,74.6,-47.64,66.8,-47.66
2018-04-01 05:00:00,128.7,-47.83,90.5,-47.6,79.4,-47.65,74.2,-47.65
2018-04-01 06:00:00,119.6,-47.8,88.3,-47.61,74.9,-47.64,72.3,-47.66
2018-04-01 07:00:00,108.2,-47.77,81.1,-47.61,70.2,-47.63,65.2,-47.66
2018-04-01 08:00:00,99.7,-47.75,79.9,-47.61,66.8,-47.63,62.6,-47.65
2018-04-01 09:00:00,93.0,-47.72,73.2,-47.61,64.8,-47.61,58.9,-47.64
2018-04-01 10:00:00,86.9,-47.71,67.3,-47.6,60.9,-47.61,56.5,-47.63
2018-04-01 11:00:00,81.9,-47.7,62.5,-47.59,57.1,-47.59,53.1,-47.62
2018-04-01 12:00:00,79.2,-47.69,61.2,-47.58,54.6,-47.57,52.9,-47.6
2018-04-01 13:00:00,83.2,-47.7,65.8,-47.59,57.9,-47.57,56.4,-47.6
2018-04-01 14:00:00,92.1,-47.74,76.4,-47.63,60.9,-47.57,60.9,-47.6
2018-04-01 15:00:00,110.2,-47.81,119.7,-47.81,66.7,-47.59,68.4,-47.6
2018-04-01 16:00:00,125.7,-47.87,160.6,-47.99,72.1,-47.59,73.8,-47.6
2018-04-01 17:00:00,141.8,-47.94,177.9,-48.05,77.9,-47.6,79.4,-47.61
2018-04-01 18:00:00,161.5,-48.02,197.6,-48.15,84.9,-47.61,82.2,-47.63
2018-04-01 19:00:00,153.4,-48.0,148.2,-47.95,84.4,-47.62,78.8,-47.63
2018-04-01 20:00:00,108.9,-47.83,90.0,-47.73,71.3,-47.61,66.3,-47.64
2018-04-01 21:00:00,97.9,-47.8,71.9,-47.66,67.7,-47.61,61.7,-47.64
2018-04-01 22:00:00,90.1,-47.77,84.8,-47.74,55.6,-47.58,50.7,-47.6
2018-04-01 23:00:00,105.2,-47.83,137.2,-47.97,68.5,-47.62,64.2,-47.68
2018-04-02 00:00:00,102.3,-47.83,114.2,-47.89,66.1,-47.63,59.2,-47.69
2018-04-02 01:00:00,92.4,-47.8,141.2,-48.01,57.9,-47.61,51.5,-47.65
2018-04-02 02:00:00,101.2,-47.84,126.2,-47.95,57.9,-47.6,52.7,-47.64
2018-04-02 03:00:00,107.4,-47.86,77.4,-47.72,57.8,-47.59,46.5,-47.57
2018-04-02 04:00:00,119.1,-47.91,88.0,-47.76,60.1,-47.6,49.3,-47.55
2018-04-02 05:00:00,133.0,-47.97,62.1,-47.64,65.6,-47.62,59.5,-47.56
2018-04-02 06:00:00,136.2,-47.99,68.4,-47.66,67.3,-47.62,61.0,-47.56
2018-04-02 07:00:00,135.8,-47.99,69.7,-47.68,69.2,-47.63,67.7,-47.59
2018-04-02 08:00:00,134.0,-47.98,72.1,-47.69,69.9,-47.64,67.6,-47.59
2018-04-02 09:00:00,137.6,-48.0,70.4,-47.68,71.4,-47.65,68.3,-47.6
2018-04-02 10:00:00,111.9,-47.91,72.1,-47.72,65.0,-47.65,58.8,-47.64
2018-04-02 11:00:00,100.2,-47.86,64.1,-47.7,60.2,-47.64,57.6,-47.65
2018-04-02 12:00:00,92.5,-47.83,54.5,-47.66,54.7,-47.62,50.4,-47.63
2018-04-02 13:00:00,110.0,-47.9,61.7,-47.68,63.6,-47.65,61.9,-47.67
2018-04-02 14:00:00,96.4,-47.85,59.5,-47.68,56.8,-47.62,52.0,-47.63
2018-04-02 15:00:00,86.1,-47.81,56.0,-47.67,53.8,-47.61,47.4,-47.64
2018-04-02 16:00:00,102.6,-47.89,64.3,-47.7,63.5,-47.66,54.8,-47.67
2018-04-02 17:00:00,131.9,-48.01,76.5,-47.74,76.7,-47.69,62.4,-47.64
2018-04-02 18:00:00,157.9,-48.11,85.3,-47.76,85.5,-47.7,70.3,-47.63
2018-04-02 19:00:00,166.1,-48.14,92.8,-47.78,90.3,-47.72,74.8,-47.64
2018-04-02 20:00:00,149.2,-48.07,91.7,-47.78,83.6,-47.67,70.2,-47.65
2018-04-02 21:00:00,125.5,-47.97,88.6,-47.77,69.6,-47.6,56.6,-47.63
2018-04-02 22:00:00,107.6,-47.88,69.1,-47.68,56.3,-47.55,43.3,-47.57
2018-04-02 23:00:00,93.4,-47.82,58.8,-47.63,50.9,-47.52,37.5,-47.57
2018-04-03 00:00:00,78.6,-47.77,51.2,-47.62,45.8,-47.53,34.0,-47.59
2018-04-03 01:00:00,86.0,-47.8,60.9,-47.67,50.4,-47.56,37.5,-47.61
2018-04-03 02:00:00,83.1,-47.8,62.3,-47.68,50.0,-47.57,39.8,-47.62
2018-04-03 03:00:00,76.9,-47.78,59.8,-47.69,49.5,-47.59,40.4,-47.64
2018-04-03 04:00:00,86.0,-47.82,63.2,-47.7,55.3,-47.61,45.0,-47.65
2018-04-03 05:00:00,96.8,-47.87,71.1,-47.74,60.8,-47.64,50.7,-47.67
2018-04-03 06:00:00,104.5,-47.91,73.3,-47.75,64.4,-47.65,54.5,-47.68
2018-04-03 07:00:00,97.3,-47.87,72.8,-47.75,61.2,-47.64,52.5,-47.69
2018-04-03 08:00:00,76.6,-47.78,60.2,-47.7,50.8,-47.6,41.7,-47.66
2018-04-03 09:00:00,69.1,-47.74,52.2,-47.65,45.3,-47.58,35.5,-47.63
2018-04-03 10:00:00,74.1,-47.76,54.7,-47.66,46.8,-47.58,37.2,-47.63
2018-04-03 11:00:00,82.3,-47.8,55.7,-47.66,50.6,-47.58,39.1,-47.63
2018-04-03 12:00:00,74.9,-47.77,51.5,-47.65,48.6,-47.58,38.7,-47.66
2018-04-03 13:00:00,50.4,-47.65,35.2,-47.57,33.6,-47.53,25.3,-47.61
2018-04-03 14:00:00,40.2,-47.59,28.3,-47.53,25.5,-47.48,18.2,-47.58
2018-04-03 15:00:00,40.2,-47.59,26.8,-47.52,24.7,-47.48,16.5,-47.57
2018-04-03 16:00:00,42.8,-47.59,24.8,-47.5,24.9,-47.47,16.3,-47.55
2018-04-03 17:00:00,53.7,-47.65,32.2,-47.53,31.6,-47.49,21.9,-47.56
2018-04-03 18:00:00,62.5,-47.68,37.5,-47.56,35.5,-47.5,24.6,-47.56
2018-04-03 19:00:00,74.7,-47.74,50.8,-47.61,41.8,-47.51,30.3,-47.58
2018-04-03 20:00:00,81.4,-47.78,58.8,-47.66,46.5,-47.54,35.3,-47.62
2018-04-03 21:00:00,121.6,-47.95,77.4,-47.72,62.1,-47.58,48.4,-47.62
2018-04-03 22:00:00,166.1,-48.12,91.6,-47.75,76.7,-47.64,63.5,-47.61
2018-04-03 23:00:00,197.4,-48.24,92.9,-47.74,88.1,-47.68,75.2,-47.57
2018-04-04 00:00:00,196.3,-48.23,84.1,-47.71,89.1,-47.68,75.4,-47.56
2018-04-04 01:00:00,178.9,-48.17,82.1,-47.72,85.2,-47.68,67.0,-47.56
2018-04-04 02:00:00,160.0,-48.09,70.4,-47.67,77.3,-47.65,66.5,-47.58
2018-04-04 03:00:00,137.9,-48.0,55.1,-47.61,66.5,-47.62,54.9,-47.55
2018-04-04 04:00:00,108.5,-47.88,51.9,-47.61,54.7,-47.58,42.9,-47.55
2018-04-04 05:00:00,102.7,-47.85,54.5,-47.62,52.8,-47.57,42.6,-47.55
2018-04-04 06:00:00,99.8,-47.84,41.4,-47.56,52.1,-47.57,44.2,-47.57
2018-04-04 07:00:00,86.9,-47.79,44.5,-47.59,49.2,-47.58,41.8,-47.6
2018-04-04 08:00:00,71.8,-47.74,44.7,-47.61,44.1,-47.59,37.7,-47.63
2018-04-04 09:00:00,53.3,-47.66,33.6,-47.56,33.6,-47.54,27.2,-47.61
2018-04-04 10:00:00,45.5,-47.62,25.9,-47.52,28.2,-47.51,21.7,-47.59
2018-04-04 11:00:00,42.0,-47.61,24.0,-47.52,26.6,-47.51,19.9,-47.59
2018-04-04 12:00:00,39.2,-47.58,22.3,-47.5,23.2,-47.48,17.4,-47.55
2018-04-04 13:00:00,38.9,-47.58,22.6,-47.5,22.2,-47.47,16.3,-47.54
2018-04-04 14:00:00,37.3,-47.57,27.0,-47.52,22.0,-47.47,16.0,-47.53
2018-04-04 15:00:00,34.1,-47.55,20.5,-47.48,20.2,-47.45,12.9,-47.52
2018-04-04 16:00:00,36.8,-47.56,20.5,-47.47,21.3,-47.45,13.8,-47.51
2018-04-04 17:00:00,43.7,-47.59,27.0,-47.5,26.5,-47.46,18.3,-47.52
2018-04-04 18:00:00,56.5,-47.65,34.7,-47.54,38.0,-47.5,27.5,-47.55
2018-04-04 19:00:00,75.2,-47.73,52.1,-47.61,60.8,-47.57,44.8,-47.63
2018-04-04 20:00:00,83.2,-47.8,80.8,-47.79,76.9,-47.68,72.6,-47.81
2018-04-04 21:00:00,84.3,-47.8,92.8,-47.84,65.5,-47.64,79.5,-47.83
2018-04-04 22:00:00,81.9,-47.78,90.8,-47.82,61.5,-47.61,76.8,-47.82
2018-04-04 23:00:00,82.2,-47.75,83.3,-47.76,58.6,-47.57,71.1,-47.76
2018-04-05 00:00:00,83.9,-47.75,86.5,-47.76,60.9,-47.56,77.3,-47.74
2018-04-05 01:00:00,72.8,-47.7,64.4,-47.66,50.1,-47.53,55.8,-47.64
2018-04-05 02:00:00,79.5,-47.69,79.4,-47.71,53.3,-47.54,64.0,-47.64
2018-04-05 03:00:00,65.4,-47.62,56.4,-47.6,43.9,-47.49,55.5,-47.57
2018-04-05 04:00:00,70.2,-47.65,65.5,-47.63,42.1,-47.48,52.1,-47.57
2018-04-05 05:00:00,74.6,-47.68,67.3,-47.64,40.6,-47.49,52.1,-47.55
2018-04-05 06:00:00,78.4,-47.7,68.8,-47.64,41.4,-47.5,50.8,-47.54
2018-04-05 07:00:00,73.5,-47.68,71.4,-47.66,38.7,-47.51,48.9,-47.55
2018-04-05 08:00:00,51.7,-47.6,49.4,-47.58,27.3,-47.47,39.2,-47.53
2018-04-05 09:00:00,47.5,-47.58,46.6,-47.58,25.8,-47.46,38.4,-47.52
2018-04-05 10:00:00,41.1,-47.55,43.5,-47.56,22.3,-47.44,35.5,-47.5
2018-04-05 11:00:00,40.0,-47.55,43.3,-47.56,21.6,-47.44,34.9,-47.5
2018-04-05 12:00:00,41.0,-47.55,43.2,-47.55,21.6,-47.43,34.0,-47.5
2018-04-05 13:00:00,47.6,-47.57,47.8,-47.56,24.4,-47.42,35.3,-47.47
2018-04-05 14:00:00,54.7,-47.61,52.1,-47.58,27.6,-47.42,36.0,-47.48
2018-04-05 15:00:00,57.0,-47.62,50.8,-47.59,28.5,-47.43,33.7,-47.49
2018-04-05 16:00:00,49.3,-47.6,44.7,-47.58,28.6,-47.45,30.0,-47.51
2018-04-05 17:00:00,54.2,-47.62,44.2,-47.57,34.5,-47.48,33.9,-47.52
2018-04-05 18:00:00,66.2,-47.66,45.3,-47.57,37.4,-47.48,38.7,-47.49
2018-04-05 19:00:00,79.5,-47.72,45.3,-47.55,40.9,-47.49,42.6,-47.5
2018-04-05 20:00:00,89.3,-47.76,57.5,-47.61,47.3,-47.51,44.6,-47.51
2018-04-05 21:00:00,106.5,-47.83,106.2,-47.83,54.9,-47.53,48.2,-47.54
2018-04-05 22:00:00,133.5,-47.93,167.7,-48.08,62.9,-47.54,61.3,-47.55
2018-04-05 23:00:00,183.2,-48.12,319.8,-48.66,81.5,-47.58,83.4,-47.58
2018-04-06 00:00:00,193.3,-48.16,367.3,-48.82,84.6,-47.59,76.5,-47.56
2018-04-06 01:00:00,210.2,-48.23,409.8,-48.96,92.8,-47.62,87.6,-47.58
2018-04-06 02:00:00,217.1,-48.26,400.8,-48.95,100.1,-47.67,100.8,-47.66
2018-04-06 03:00:00,216.0,-48.26,385.3,-48.9,102.7,-47.68,102.3,-47.68
2018-04-06 04:00:00,192.8,-48.16,338.7,-48.74,96.6,-47.66,86.4,-47.65
2018-04-06 05:00:00,176.2,-48.1,312.2,-48.65,91.9,-47.65,84.1,-47.66
2018-04-06 06:00:00,168.0,-48.07,285.9,-48.54,88.7,-47.65,83.5,-47.66
2018-04-06 07:00:00,149.4,-47.99,237.5,-48.37,84.0,-47.64,81.3,-47.69
2018-04-06 08:00:00,123.4,-47.9,182.5,-48.17,73.9,-47.62,73.7,-47.69
2018-04-06 09:00:00,103.8,-47.82,144.8,-48.02,65.2,-47.6,69.1,-47.7
2018-04-06 10:00:00,97.9,-47.8,135.7,-47.98,62.6,-47.6,68.8,-47.7
2018-04-06 11:00:00,87.2,-47.77,115.9,-47.91,59.5,-47.6,67.8,-47.71
2018-04-06 12:00:00,79.6,-47.74,96.2,-47.82,57.4,-47.61,64.4,-47.73
2018-04-06 13:00:00,76.8,-47.74,80.2,-47.76,58.4,-47.61,61.6,-47.72
2018-04-06 14:00:00,75.5,-47.74,70.0,-47.72,60.4,-47.62,63.8,-47.76
2018-04-06 15:00:00,72.6,-47.74,64.7,-47.69,58.3,-47.62,60.5,-47.74
2018-04-06 16:00:00,71.1,-47.74,59.4,-47.68,54.9,-47.63,51.8,-47.71
2018-04-06 17:00:00,88.8,-47.81,67.6,-47.71,62.7,-47.64,59.7,-47.71
2018-04-06 18:00:00,160.4,-48.07,109.9,-47.85,90.7,-47.68,80.4,-47.68
2018-04-06 19:00:00,270.1,-48.47,151.7,-47.95,128.2,-47.75,108.8,-47.58
2018-04-06 20:00:00,364.5,-48.78,162.4,-47.91,162.0,-47.81,141.3,-47.52
2018-04-06 21:00:00,450.3,-49.03,370.7,-48.66,190.7,-47.85,164.0,-47.48
2018-04-06 22:00:00,584.3,-49.39,1035.2,-50.49,230.0,-47.92,194.6,-47.53
2018-04-06 23:00:00,570.7,-49.36,1210.1,-50.87,224.5,-47.9,185.2,-47.56
2018-04-07 00:00:00,559.5,-49.32,1196.3,-50.84,219.6,-47.88,192.6,-47.57
2018-04-07 01:00:00,593.4,-49.41,1306.2,-51.04,229.9,-47.91,243.8,-47.68
2018-04-07 02:00:00,578.6,-49.38,1129.3,-50.71,222.2,-47.91,299.2,-47.9
2018-04-07 03:00:00,533.1,-49.26,964.2,-50.38,200.9,-47.89,290.5,-47.91
2018-04-07 04:00:00,465.3,-49.07,810.1,-50.03,171.7,-47.85,235.8,-47.77
2018-04-07 05:00:00,430.7,-48.97,784.3,-49.98,162.5,-47.84,242.3,-47.86
2018-04-07 06:00:00,380.0,-48.82,698.3,-49.79,150.6,-47.82,214.7,-47.87
2018-04-07 07:00:00,308.6,-48.61,515.3,-49.3,137.6,-47.81,204.9,-48.09
2018-04-07 08:00:00,212.7,-48.28,328.2,-48.73,115.8,-47.75,123.3,-47.89
2018-04-07 09:00:00,127.5,-47.95,115.7,-47.9,80.3,-47.67,84.3,-47.78
2018-04-07 10:00:00,89.6,-47.82,63.6,-47.69,62.8,-47.65,57.2,-47.71
2018-04-07 11:00:00,81.2,-47.79,61.2,-47.69,59.2,-47.65,53.3,-47.71
2018-04-07 12:00:00,74.8,-47.76,56.6,-47.68,55.6,-47.64,49.7,-47.71
2018-04-07 13:00:00,75.7,-47.77,55.3,-47.68,56.7,-47.65,47.9,-47.72
2018-04-07 14:00:00,83.3,-47.83,60.2,-47.73,64.3,-47.7,52.7,-47.81
2018-04-07 15:00:00,97.9,-47.92,82.6,-47.85,73.5,-47.76,63.7,-47.91
2018-04-07 16:00:00,132.0,-48.07,104.9,-47.94,94.9,-47.83,79.8,-47.95
2018-04-07 17:00:00,139.5,-48.08,114.5,-47.97,100.5,-47.81,90.3,-47.95
2018-04-07 18:00:00,142.0,-48.08,138.9,-48.07,106.8,-47.83,111.0,-48.0
2018-04-07 19:00:00,147.5,-48.09,149.5,-48.1,110.4,-47.82,122.0,-48.02
2018-04-07 20:00:00,148.3,-48.07,131.4,-47.99,102.6,-47.75,111.7,-47.91
2018-04-07 21:00:00,169.0,-48.15,134.9,-47.99,104.0,-47.73,107.4,-47.85
2018-04-07 22:00:00,168.3,-48.14,146.7,-48.02,105.7,-47.69,111.1,-47.85
2018-04-07 23:00:00,175.0,-48.15,146.3,-47.99,110.3,-47.65,108.1,-47.81
2018-04-08 00:00:00,180.4,-48.16,145.5,-47.97,114.1,-47.63,109.1,-47.77
2018-04-08 01:00:00,199.1,-48.21,152.5,-47.97,128.9,-47.63,120.1,-47.74
2018-04-08 02:00:00,224.7,-48.29,166.0,-47.99,143.7,-47.65,132.6,-47.71
2018-04-08 03:00:00,246.4,-48.38,176.9,-48.02,150.6,-47.69,140.8,-47.71
2018-04-08 04:00:00,307.0,-48.6,256.4,-48.34,160.3,-47.76,148.8,-47.72
2018-04-08 05:00:00,323.5,-48.66,414.6,-48.96,148.2,-47.78,154.5,-47.77
2018-04-08 06:00:00,311.1,-48.62,521.6,-49.31,135.6,-47.75,143.3,-47.74
2018-04-08 07:00:00,268.9,-48.47,492.3,-49.24,118.3,-47.72,122.7,-47.72
2018-04-08 08:00:00,198.1,-48.21,313.2,-48.66,89.3,-47.65,89.4,-47.66
2018-04-08 09:00:00,185.1,-48.16,199.5,-48.21,82.3,-47.63,76.8,-47.59
2018-04-08 10:00:00,191.5,-48.18,162.8,-48.03,84.9,-47.62,78.4,-47.53
2018-04-08 11:00:00,197.3,-48.19,165.4,-48.0,89.2,-47.59,87.2,-47.47
2018-04-08 12:00:00,222.6,-48.27,176.5,-47.99,102.8,-47.57,103.0,-47.42
2018-04-08 13:00:00,198.2,-48.18,188.2,-48.08,87.9,-47.58,90.0,-47.48
2018-04-08 14:00:00,187.2,-48.15,224.2,-48.25,78.5,-47.58,90.2,-47.51
2018-04-08 15:00:00,253.5,-48.38,407.6,-48.9,95.6,-47.63,123.7,-47.54
2018-04-08 16:00:00,257.1,-48.4,482.9,-49.16,94.3,-47.63,128.2,-47.57
2018-04-08 17:00:00,213.1,-48.25,435.3,-49.02,81.6,-47.61,111.9,-47.58
2018-04-08 18:00:00,228.2,-48.3,358.8,-48.77,83.2,-47.62,112.1,-47.57
2018-04-08 19:00:00,306.5,-48.55,239.3,-48.28,93.3,-47.64,134.5,-47.58
2018-04-08 20:00:00,289.9,-48.52,228.6,-48.29,119.4,-47.81,160.2,-47.93
2018-04-08 21:00:00,264.5,-48.43,225.1,-48.28,119.6,-47.82,156.3,-47.9
2018-04-08 22:00:00,279.1,-48.47,226.3,-48.25,119.1,-47.8,159.4,-47.86
2018-04-08 23:00:00,304.0,-48.55,242.1,-48.31,122.8,-47.81,163.2,-47.86
2018-04-09 00:00:00,262.4,-48.41,213.7,-48.21,110.5,-47.77,143.9,-47.82
2018-04-09 01:00:00,235.4,-48.32,214.3,-48.24,102.3,-47.74,135.2,-47.82
2018-04-09 02:00:00,210.0,-48.24,228.0,-48.31,96.4,-47.74,133.6,-47.85
2018-04-09 03:00:00,205.3,-48.23,246.2,-48.39,97.6,-47.75,137.9,-47.89
2018-04-09 04:00:00,224.6,-48.29,246.7,-48.38,104.3,-47.77,142.0,-47.9
2018-04-09 05:00:00,236.3,-48.33,231.4,-48.32,102.8,-47.76,144.1,-47.88
2018-04-09 06:00:00,199.7,-48.2,222.6,-48.31,90.7,-47.72,126.6,-47.85
2018-04-09 07:00:00,196.9,-48.19,240.6,-48.38,89.9,-47.72,124.7,-47.86
2018-04-09 08:00:00,196.5,-48.19,255.8,-48.44,92.9,-47.73,121.5,-47.84
2018-04-09 09:00:00,202.3,-48.21,275.5,-48.52,97.1,-47.74,119.7,-47.83
2018-04-09 10:00:00,180.1,-48.14,263.8,-48.49,94.4,-47.73,114.9,-47.85
2018-04-09 11:00:00,157.3,-48.06,245.8,-48.42,87.8,-47.71,116.5,-47.89
2018-04-09 12:00:00,160.2,-48.06,253.0,-48.44,88.1,-47.71,125.1,-47.92
2018-04-09 13:00:00,151.8,-48.01,250.6,-48.42,77.9,-47.66,120.3,-47.89
2018-04-09 14:00:00,152.5,-47.98,270.9,-48.45,73.5,-47.64,115.1,-47.81
2018-04-09 15:00:00,172.2,-48.03,313.5,-48.58,79.2,-47.64,133.1,-47.84
2018-04-09 16:00:00,174.7,-48.03,306.9,-48.55,80.6,-47.65,118.2,-47.79
2018-04-09 17:00:00,180.4,-48.03,316.4,-48.58,82.0,-47.65,111.5,-47.73
2018-04-09 18:00:00,220.6,-48.13,397.7,-48.81,92.9,-47.67,136.9,-47.75
2018-04-09 19:00:00,250.0,-48.18,458.5,-48.94,100.9,-47.68,183.7,-47.84
2018-04-09 20:00:00,266.2,-48.2,489.3,-48.99,103.3,-47.68,195.4,-47.83
2018-04-09 21:00:00,272.4,-48.21,503.7,-49.0,106.6,-47.69,205.1,-47.83
2018-04-09 22:00:00,269.8,-48.21,485.4,-48.95,106.4,-47.69,207.0,-47.84
2018-04-09 23:00:00,238.4,-48.15,431.3,-48.82,100.3,-47.69,176.5,-47.78
2018-04-10 00:00:00,250.7,-48.18,449.5,-48.87,105.3,-47.7,176.9,-47.74
2018-04-10 01:00:00,293.1,-48.35,559.0,-49.21,120.3,-47.73,171.2,-47.59
2018-04-10 02:00:00,335.5,-48.48,560.1,-49.22,131.8,-47.75,160.1,-47.48
2018-04-10 03:00:00,363.7,-48.57,562.4,-49.23,137.6,-47.76,162.7,-47.46
2018-04-10 04:00:00,310.1,-48.42,444.5,-48.91,119.4,-47.73,137.7,-47.51
2018-04-10 05:00:00,237.3,-48.23,329.6,-48.61,104.5,-47.73,114.3,-47.63
2018-04-10 06:00:00,209.5,-48.13,302.9,-48.52,102.3,-47.73,121.1,-47.74
2018-04-10 07:00:00,212.0,-48.14,321.8,-48.58,105.3,-47.75,125.3,-47.74
2018-04-10 08:00:00,220.7,-48.16,344.0,-48.66,107.3,-47.75,141.3,-47.81
2018-04-10 09:00:00,207.4,-48.11,301.6,-48.45,102.4,-47.74,151.7,-47.83
2018-04-10 10:00:00,173.0,-48.0,257.7,-48.32,91.8,-47.7,129.6,-47.8
2018-04-10 11:00:00,160.9,-47.98,239.4,-48.26,91.6,-47.69,126.1,-47.79
2018-04-10 12:00:00,177.8,-48.03,260.1,-48.33,99.1,-47.71,131.0,-47.77
2018-04-10 13:00:00,168.2,-48.03,231.0,-48.26,101.4,-47.73,111.2,-47.74
2018-04-10 14:00:00,149.8,-47.97,189.5,-48.11,97.7,-47.72,104.4,-47.75
2018-04-10 15:00:00,141.0,-47.96,178.4,-48.11,99.1,-47.73,100.3,-47.8
2018-04-10 16:00:00,146.0,-48.0,199.5,-48.22,100.2,-47.72,95.9,-47.79
2018-04-10 17:00:00,158.3,-48.04,229.6,-48.33,101.5,-47.71,97.0,-47.77
2018-04-10 18:00:00,198.5,-48.18,290.8,-48.54,116.2,-47.74,108.3,-47.72
2018-04-10 19:00:00,290.6,-48.48,490.0,-49.16,150.5,-47.79,162.8,-47.81
2018-04-10 20:00:00,352.2,-48.67,611.3,-49.47,172.6,-47.81,219.2,-47.92
2018-04-10 21:00:00,345.4,-48.63,546.8,-49.28,169.2,-47.79,166.1,-47.65
2018-04-10 22:00:00,301.3,-48.48,422.4,-48.88,143.6,-47.73,149.2,-47.62
2018-04-10 23:00:00,175.9,-48.09,230.8,-48.23,82.9,-47.61,101.3,-47.54
2018-04-11 00:00:00,300.1,-48.45,274.7,-48.31,122.7,-47.69,145.0,-47.54
2018-04-11 01:00:00,349.2,-48.54,249.9,-48.13,151.2,-47.77,171.3,-47.65
2018-04-11 02:00:00,296.7,-48.42,306.2,-48.46,158.4,-47.83,175.9,-47.83
2018-04-11 03:00:00,296.3,-48.47,281.1,-48.41,185.3,-47.95,197.3,-48.02
2018-04-11 04:00:00,335.5,-48.59,293.0,-48.41,204.9,-47.99,214.2,-48.02
2018-04-11 05:00:00,319.7,-48.54,239.5,-48.22,193.6,-47.96,189.1,-47.97
2018-04-11 06:00:00,243.4,-48.29,184.4,-48.05,153.7,-47.86,147.1,-47.91
2018-04-11 07:00:00,211.3,-48.18,183.3,-48.07,128.7,-47.78,122.0,-47.82
2018-04-11 08:00:00,193.9,-48.12,185.0,-48.1,111.2,-47.72,109.8,-47.77
2018-04-11 09:00:00,182.7,-48.07,184.6,-48.1,104.5,-47.7,101.8,-47.75
2018-04-11 10:00:00,179.0,-48.05,182.6,-48.08,106.2,-47.7,101.2,-47.74
2018-04-11 11:00:00,178.7,-48.06,181.8,-48.08,108.8,-47.72,100.1,-47.74
2018-04-11 12:00:00,174.8,-48.05,173.8,-48.04,110.9,-47.73,103.8,-47.76
2018-04-11 13:00:00,166.6,-48.01,162.8,-48.0,106.1,-47.71,98.7,-47.75
2018-04-11 14:00:00,153.3,-47.96,151.5,-47.97,96.4,-47.67,89.2,-47.72
2018-04-11 15:00:00,157.8,-47.98,143.0,-47.92,94.7,-47.67,91.5,-47.71
2018-04-11 16:00:00,149.8,-47.94,137.4,-47.89,89.7,-47.65,91.3,-47.72
2018-04-11 17:00:00,145.4,-47.94,140.3,-47.91,90.4,-47.66,91.4,-47.71
2018-04-11 18:00:00,154.6,-47.97,143.4,-47.91,97.2,-47.67,98.2,-47.71
2018-04-11 19:00:00,206.7,-48.16,197.3,-48.11,114.9,-47.72,124.8,-47.74
2018-04-11 20:00:00,251.8,-48.31,197.5,-48.09,138.1,-47.78,139.6,-47.79
2018-04-11 21:00:00,283.6,-48.41,217.4,-48.15,150.9,-47.82,152.2,-47.83
2018-04-11 22:00:00,299.9,-48.45,235.3,-48.2,161.1,-47.86,167.1,-47.87
2018-04-11 23:00:00,313.7,-48.47,222.9,-48.14,169.5,-47.89,174.7,-47.9
2018-04-12 00:00:00,304.4,-48.44,209.7,-48.08,170.7,-47.9,170.0,-47.88
2018-04-12 01:00:00,258.6,-48.31,183.1,-48.04,156.3,-47.87,150.0,-47.89
2018-04-12 02:00:00,234.5,-48.27,154.8,-47.94,136.0,-47.81,124.9,-47.83
2018-04-12 03:00:00,225.0,-48.23,140.3,-47.86,126.3,-47.77,111.8,-47.78
2018-04-12 04:00:00,216.4,-48.2,131.9,-47.85,120.7,-47.74,102.6,-47.75
2018-04-12 05:00:00,212.7,-48.18,131.7,-47.84,116.8,-47.73,103.2,-47.75
2018-04-12 06:00:00,218.3,-48.18,132.0,-47.81,119.8,-47.74,104.7,-47.74
2018-04-12 07:00:00,239.8,-48.24,143.6,-47.86,124.0,-47.74,111.3,-47.76
2018-04-12 08:00:00,222.9,-48.19,148.4,-47.9,124.3,-47.75,112.3,-47.79
2018-04-12 09:00:00,213.7,-48.16,159.3,-47.96,131.7,-47.78,119.7,-47.85
2018-04-12 10:00:00,216.7,-48.16,204.6,-48.14,139.7,-47.8,139.2,-47.91
2018-04-12 11:00:00,224.5,-48.16,200.6,-48.09,149.9,-47.83,147.5,-47.93
2018-04-12 12:00:00,211.0,-48.08,185.1,-48.02,146.6,-47.81,146.9,-47.92
2018-04-12 13:00:00,183.7,-48.01,163.3,-47.97,134.8,-47.78,126.2,-47.88
2018-04-12 14:00:00,168.4,-48.0,139.2,-47.9,130.2,-47.78,118.2,-47.89
2018-04-12 15:00:00,159.7,-47.98,124.8,-47.84,121.4,-47.76,109.1,-47.86
2018-04-12 16:00:00,151.7,-47.95,112.9,-47.81,114.8,-47.73,98.6,-47.84
2018-04-12 17:00:00,147.8,-47.95,107.3,-47.78,105.7,-47.71,90.1,-47.81
2018-04-12 18:00:00,144.0,-47.92,100.4,-47.74,97.3,-47.68,82.5,-47.78
2018-04-12 19:00:00,144.5,-47.92,96.3,-47.71,96.9,-47.67,80.2,-47.76
2018-04-12 20:00:00,144.7,-47.91,96.0,-47.7,95.8,-47.66,80.6,-47.75
2018-04-12 21:00:00,150.8,-47.91,95.8,-47.68,95.4,-47.64,78.9,-47.72
2018-04-12 22:00:00,148.3,-47.91,91.8,-47.66,92.0,-47.64,76.2,-47.71
2018-04-12 23:00:00,136.8,-47.89,84.5,-47.65,84.9,-47.63,72.0,-47.72
2018-04-13 00:00:00,131.4,-47.88,77.6,-47.65,81.0,-47.63,65.3,-47.71
2018-04-13 01:00:00,141.0,-47.92,91.5,-47.7,82.9,-47.63,67.9,-47.7
2018-04-13 02:00:00,160.9,-48.01,98.1,-47.72,88.1,-47.65,75.0,-47.68
2018-04-13 03:00:00,206.7,-48.16,108.5,-47.69,108.0,-47.65,95.2,-47.55
2018-04-13 04:00:00,235.1,-48.24,124.8,-47.7,123.1,-47.64,113.4,-47.47
2018-04-13 05:00:00,252.0,-48.27,139.4,-47.7,138.2,-47.57,128.9,-47.43
2018-04-13 06:00:00,209.0,-48.11,132.6,-47.71,128.9,-47.53,126.4,-47.58
2018-04-13 07:00:00,163.4,-47.97,127.4,-47.78,112.9,-47.58,121.9,-47.78
2018-04-13 08:00:00,164.2,-47.98,160.5,-47.95,128.3,-47.64,143.4,-47.91
2018-04-13 09:00:00,154.2,-47.96,145.5,-47.91,120.7,-47.67,112.0,-47.83
2018-04-13 10:00:00,144.6,-47.94,127.2,-47.85,114.2,-47.67,94.2,-47.79
2018-04-13 11:00:00,139.3,-47.92,117.3,-47.8,110.9,-47.66,98.3,-47.79
2018-04-13 12:00:00,129.7,-47.87,106.4,-47.76,106.1,-47.64,94.4,-47.79
2018-04-13 13:00:00,122.7,-47.83,99.7,-47.73,107.6,-47.65,83.6,-47.74
2018-04-13 14:00:00,119.6,-47.82,96.2,-47.72,109.6,-47.66,77.4,-47.72
2018-04-13 15:00:00,121.1,-47.83,95.2,-47.72,109.1,-47.67,76.8,-47.74
2018-04-13 16:00:00,127.8,-47.84,100.4,-47.72,109.1,-47.66,80.1,-47.72
2018-04-13 17:00:00,142.5,-47.89,119.1,-47.78,119.9,-47.67,92.1,-47.74
2018-04-13 18:00:00,176.4,-48.02,144.9,-47.85,141.6,-47.73,112.0,-47.75
2018-04-13 19:00:00,307.6,-48.46,200.0,-47.93,201.1,-47.77,156.7,-47.59
2018-04-13 20:00:00,439.1,-48.86,243.4,-47.96,252.9,-47.72,201.4,-47.49
2018-04-13 21:00:00,434.2,-48.88,242.9,-48.02,246.5,-47.72,201.1,-47.63
2018-04-13 22:00:00,444.2,-48.95,259.3,-48.12,243.2,-47.78,201.5,-47.66
2018-04-13 23:00:00,474.5,-49.03,270.6,-48.13,254.3,-47.83,213.3,-47.61
2018-04-14 00:00:00,455.4,-48.96,269.4,-48.13,256.3,-47.81,209.3,-47.64
2018-04-14 01:00:00,427.0,-48.88,266.2,-48.13,252.5,-47.79,207.5,-47.65
2018-04-14 02:00:00,401.3,-48.81,249.4,-48.1,239.7,-47.82,195.9,-47.67
2018-04-14 03:00:00,437.1,-48.93,259.1,-48.13,246.9,-47.84,204.9,-47.63
2018-04-14 04:00:00,505.3,-49.08,314.4,-48.21,285.8,-47.73,243.8,-47.51
2018-04-14 05:00:00,468.9,-48.99,298.7,-48.21,273.0,-47.8,234.7,-47.56
2018-04-14 06:00:00,481.9,-49.04,324.6,-48.32,267.7,-47.86,227.6,-47.6
2018-04-14 07:00:00,459.6,-48.98,328.2,-48.37,254.7,-47.83,216.7,-47.66
2018-04-14 08:00:00,386.8,-48.78,296.8,-48.37,216.3,-47.83,185.9,-47.75
2018-04-14 09:00:00,242.6,-48.33,205.0,-48.17,147.9,-47.79,126.3,-47.81
2018-04-14 10:00:00,165.5,-48.06,168.8,-48.08,107.4,-47.72,92.0,-47.78
2018-04-14 11:00:00,145.3,-47.97,149.9,-48.01,98.5,-47.69,83.3,-47.78
2018-04-14 12:00:00,114.2,-47.86,106.3,-47.84,83.5,-47.66,67.8,-47.74
2018-04-14 13:00:00,102.6,-47.81,100.4,-47.81,76.6,-47.63,60.9,-47.7
2018-04-14 14:00:00,102.8,-47.8,112.2,-47.86,78.4,-47.63,61.5,-47.7
2018-04-14 15:00:00,106.0,-47.81,114.5,-47.86,80.0,-47.64,65.1,-47.7
2018-04-14 16:00:00,106.5,-47.81,117.0,-47.87,78.9,-47.63,63.9,-47.69
2018-04-14 17:00:00,105.5,-47.8,109.5,-47.83,79.7,-47.63,61.7,-47.68
2018-04-14 18:00:00,150.2,-47.97,141.1,-47.95,106.9,-47.71,90.6,-47.78
2018-04-14 19:00:00,199.7,-48.16,177.7,-48.06,132.1,-47.77,116.2,-47.79
2018-04-14 20:00:00,236.1,-48.28,287.6,-48.49,153.8,-47.81,141.2,-47.87
2018-04-14 21:00:00,272.1,-48.38,383.4,-48.8,181.2,-47.87,163.1,-47.93
2018-04-14 22:00:00,271.1,-48.37,405.2,-48.84,180.1,-47.86,190.5,-48.01
2018-04-14 23:00:00,311.8,-48.51,479.8,-49.06,189.9,-47.87,231.9,-48.12
2018-04-15 00:00:00,350.5,-48.63,555.1,-49.29,197.8,-47.89,241.7,-48.13
2018-04-15 01:00:00,361.2,-48.69,599.7,-49.44,193.4,-47.87,203.8,-47.96
2018-04-15 02:00:00,339.7,-48.65,587.9,-49.44,178.2,-47.84,179.5,-47.89
2018-04-15 03:00:00,309.4,-48.57,507.5,-49.21,165.0,-47.82,174.2,-47.94
2018-04-15 04:00:00,297.7,-48.54,467.7,-49.11,164.8,-47.84,171.8,-47.96
2018-04-15 05:00:00,271.5,-48.47,443.5,-49.06,161.5,-47.85,165.6,-47.99
2018-04-15 06:00:00,288.6,-48.53,512.0,-49.27,164.4,-47.86,168.3,-47.99
2018-04-15 07:00:00,267.3,-48.47,413.9,-48.99,151.7,-47.85,154.5,-47.96
2018-04-15 08:00:00,189.1,-48.24,152.9,-48.07,124.2,-47.86,115.2,-47.92
2018-04-15 09:00:00,138.2,-48.06,96.0,-47.87,100.4,-47.83,93.0,-47.91
2018-04-15 10:00:00,111.0,-47.95,86.5,-47.85,83.0,-47.77,75.0,-47.87
2018-04-15 11:00:00,107.9,-47.94,80.9,-47.82,81.9,-47.77,70.2,-47.84
2018-04-15 12:00:00,88.6,-47.83,66.0,-47.74,66.0,-47.69,58.8,-47.77
2018-04-15 13:00:00,93.0,-47.86,69.8,-47.76,70.7,-47.72,62.0,-47.8
2018-04-15 14:00:00,77.3,-47.77,58.2,-47.69,57.7,-47.65,50.8,-47.73
2018-04-15 15:00:00,75.8,-47.75,47.3,-47.63,53.3,-47.61,45.6,-47.67
2018-04-15 16:00:00,103.4,-47.9,71.9,-47.76,75.0,-47.73,66.4,-47.79
2018-04-15 17:00:00,111.1,-47.94,85.4,-47.82,82.1,-47.74,70.8,-47.82
2018-04-15 18:00:00,108.7,-47.92,81.7,-47.78,75.0,-47.69,63.5,-47.75
2018-04-15 19:00:00,112.7,-47.91,84.6,-47.77,71.4,-47.64,59.1,-47.68
2018-04-15 20:00:00,109.1,-47.87,79.1,-47.71,63.3,-47.56,49.6,-47.6
2018-04-15 21:00:00,85.3,-47.75,56.5,-47.59,45.8,-47.48,33.1,-47.5
2018-04-15 22:00:00,82.7,-47.73,47.3,-47.54,41.4,-47.44,28.6,-47.45
2018-04-15 23:00:00,90.8,-47.76,47.1,-47.53,43.5,-47.43,28.6,-47.42
2018-04-16 00:00:00,92.4,-47.76,48.1,-47.53,44.9,-47.42,29.2,-47.41
2018-04-16 01:00:00,86.5,-47.73,49.1,-47.53,43.0,-47.41,27.8,-47.4
2018-04-16 02:00:00,74.5,-47.68,41.3,-47.5,38.2,-47.4,23.9,-47.41
2018-04-16 03:00:00,63.4,-47.63,34.2,-47.48,33.4,-47.4,20.4,-47.42
2018-04-16 04:00:00,65.7,-47.64,33.6,-47.47,34.8,-47.41,21.8,-47.4
2018-04-16 05:00:00,71.8,-47.67,35.8,-47.47,37.8,-47.41,24.2,-47.39
2018-04-16 06:00:00,65.5,-47.64,34.5,-47.47,37.9,-47.42,24.6,-47.4
2018-04-16 07:00:00,54.0,-47.59,33.6,-47.48,37.6,-47.43,23.9,-47.42
2018-04-16 08:00:00,40.4,-47.54,28.3,-47.47,31.5,-47.44,18.3,-47.42
2018-04-16 09:00:00,31.7,-47.5,20.9,-47.44,23.5,-47.42,14.5,-47.42
2018-04-16 10:00:00,26.1,-47.48,15.6,-47.42,15.4,-47.39,10.7,-47.4
2018-04-16 11:00:00,20.2,-47.45,10.3,-47.4,10.5,-47.38,6.7,-47.38
2018-04-16 12:00:00,20.2,-47.45,10.4,-47.4,10.4,-47.38,7.1,-47.38
2018-04-16 13:00:00,18.8,-47.45,10.4,-47.4,10.1,-47.38,7.2,-47.39
2018-04-16 14:00:00,18.7,-47.45,10.4,-47.4,10.1,-47.39,7.6,-47.4
2018-04-16 15:00:00,20.4,-47.46,12.7,-47.42,11.2,-47.39,8.5,-47.41
2018-04-16 16:00:00,21.5,-47.46,12.6,-47.42,11.7,-47.39,8.5,-47.41
2018-04-16 17:00:00,27.6,-47.49,16.2,-47.43,14.5,-47.39,10.6,-47.41
2018-04-16 18:00:00,48.9,-47.59,26.6,-47.47,24.5,-47.42,17.6,-47.42
2018-04-16 19:00:00,106.4,-47.83,55.2,-47.56,45.1,-47.46,35.4,-47.4
2018-04-16 20:00:00,138.7,-47.96,55.0,-47.54,58.1,-47.52,52.9,-47.42
2018-04-16 21:00:00,136.1,-47.96,44.2,-47.52,60.2,-47.54,55.0,-47.46
2018-04-16 22:00:00,137.1,-47.97,50.1,-47.55,62.3,-47.56,58.6,-47.49
2018-04-16 23:00:00,129.9,-47.95,51.9,-47.57,60.6,-47.56,58.7,-47.51
2018-04-17 00:00:00,124.1,-47.92,42.3,-47.54,58.8,-47.56,51.2,-47.49
2018-04-17 01:00:00,123.0,-47.92,52.5,-47.58,58.7,-47.56,51.7,-47.49
2018-04-17 02:00:00,116.6,-47.89,62.4,-47.61,55.0,-47.53,47.5,-47.48
2018-04-17 03:00:00,114.9,-47.88,65.1,-47.62,51.6,-47.5,46.8,-47.48
2018-04-17 04:00:00,109.6,-47.86,66.2,-47.63,50.3,-47.5,45.6,-47.48
2018-04-17 05:00:00,103.4,-47.85,60.9,-47.63,51.1,-47.52,45.4,-47.52
2018-04-17 06:00:00,97.6,-47.84,59.5,-47.66,51.3,-47.57,46.3,-47.58
2018-04-17 07:00:00,78.5,-47.76,55.1,-47.66,45.3,-47.56,46.6,-47.63
2018-04-17 08:00:00,67.3,-47.71,49.8,-47.64,40.6,-47.55,42.9,-47.62
2018-04-17 09:00:00,64.1,-47.7,47.9,-47.64,39.4,-47.55,42.7,-47.63
2018-04-17 10:00:00,61.7,-47.69,50.5,-47.66,39.2,-47.56,46.4,-47.66
2018-04-17 11:00:00,48.8,-47.64,47.9,-47.65,34.1,-47.54,40.6,-47.64
2018-04-17 12:00:00,38.2,-47.59,40.1,-47.61,29.2,-47.52,32.1,-47.62
2018-04-17 13:00:00,34.0,-47.56,30.8,-47.56,24.9,-47.49,26.3,-47.58
2018-04-17 14:00:00,36.5,-47.57,30.4,-47.55,26.3,-47.49,24.9,-47.56
2018-04-17 15:00:00,37.8,-47.57,31.1,-47.54,26.4,-47.49,24.0,-47.55
2018-04-17 16:00:00,37.6,-47.56,30.0,-47.53,25.0,-47.47,21.7,-47.53
2018-04-17 17:00:00,43.7,-47.58,28.2,-47.5,26.7,-47.46,20.8,-47.51
2018-04-17 18:00:00,54.2,-47.63,36.9,-47.53,31.2,-47.46,23.5,-47.5
2018-04-17 19:00:00,73.2,-47.7,51.3,-47.58,38.5,-47.47,31.1,-47.5
2018-04-17 20:00:00,105.0,-47.83,69.3,-47.63,49.8,-47.48,43.2,-47.5
2018-04-17 21:00:00,110.5,-47.85,69.5,-47.63,51.4,-47.49,46.2,-47.5
2018-04-17 22:00:00,128.7,-47.93,76.6,-47.65,59.0,-47.51,53.2,-47.5
2018-04-17 23:00:00,143.6,-47.98,85.8,-47.66,66.8,-47.51,58.6,-47.46
2018-04-18 00:00:00,173.8,-48.1,107.7,-47.74,77.3,-47.52,67.8,-47.45
2018-04-18 01:00:00,206.0,-48.21,132.3,-47.82,89.0,-47.55,80.9,-47.45
2018-04-18 02:00:00,221.1,-48.26,147.8,-47.85,98.3,-47.54,93.1,-47.44
2018-04-18 03:00:00,211.8,-48.23,129.9,-47.79,94.8,-47.55,89.0,-47.45
2018-04-18 04:00:00,248.1,-48.36,127.6,-47.75,105.2,-47.58,95.2,-47.39
2018-04-18 05:00:00,314.3,-48.59,154.1,-47.82,127.9,-47.63,113.7,-47.33
2018-04-18 06:00:00,308.9,-48.58,154.3,-47.85,126.8,-47.66,113.8,-47.39
2018-04-18 07:00:00,233.8,-48.32,133.8,-47.82,101.1,-47.58,92.7,-47.45
2018-04-18 08:00:00,123.3,-47.9,93.2,-47.72,62.1,-47.47,57.1,-47.52
2018-04-18 09:00:00,68.2,-47.68,59.1,-47.62,37.5,-47.45,35.1,-47.53
2018-04-18 10:00:00,56.3,-47.63,41.3,-47.55,30.9,-47.46,28.2,-47.51
2018-04-18 11:00:00,47.1,-47.59,29.5,-47.5,26.4,-47.46,23.8,-47.5
2018-04-18 12:00:00,36.0,-47.54,23.3,-47.48,20.0,-47.44,16.8,-47.48
2018-04-18 13:00:00,34.5,-47.53,29.1,-47.51,19.5,-47.45,16.4,-47.49
2018-04-18 14:00:00,37.0,-47.55,38.8,-47.56,23.0,-47.47,20.3,-47.52
2018-04-18 15:00:00,50.5,-47.61,59.8,-47.66,34.5,-47.5,33.4,-47.58
2018-04-18 16:00:00,64.3,-47.67,76.7,-47.73,44.2,-47.53,42.3,-47.61
2018-04-18 17:00:00,80.8,-47.74,112.9,-47.88,48.9,-47.54,46.9,-47.59
2018-04-18 18:00:00,130.0,-47.94,236.3,-48.37,65.3,-47.58,62.2,-47.59
2018-04-18 19:00:00,241.7,-48.34,444.4,-49.06,109.1,-47.68,113.6,-47.68
2018-04-18 20:00:00,263.5,-48.39,466.0,-49.09,119.0,-47.68,127.0,-47.67
2018-04-18 21:00:00,266.0,-48.38,495.9,-49.14,119.2,-47.65,167.6,-47.75
2018-04-18 22:00:00,324.0,-48.57,640.0,-49.54,139.0,-47.69,189.4,-47.75
2018-04-18 23:00:00,400.0,-48.82,825.9,-50.03,167.6,-47.76,195.9,-47.72
2018-04-19 00:00:00,438.0,-48.94,869.8,-50.12,180.0,-47.79,253.1,-47.85
2018-04-19 01:00:00,456.8,-48.99,880.6,-50.15,187.8,-47.81,277.7,-47.95
2018-04-19 02:00:00,465.9,-49.02,904.5,-50.19,191.8,-47.82,294.7,-48.0
2018-04-19 03:00:00,471.1,-49.04,936.6,-50.27,195.0,-47.84,288.0,-47.96
2018-04-19 04:00:00,498.9,-49.13,994.8,-50.4,205.0,-47.86,286.6,-47.93
2018-04-19 05:00:00,543.6,-49.25,1062.2,-50.53,220.1,-47.89,302.8,-47.92
2018-04-19 06:00:00,533.3,-49.23,958.8,-50.29,216.8,-47.89,273.2,-47.8
2018-04-19 07:00:00,509.8,-49.16,846.0,-50.02,210.2,-47.87,236.7,-47.66
2018-04-19 08:00:00,495.6,-49.12,933.9,-50.23,206.5,-47.85,236.4,-47.66
2018-04-19 09:00:00,427.1,-48.93,819.3,-50.01,187.2,-47.82,209.1,-47.7
2018-04-19 10:00:00,382.9,-48.8,740.5,-49.85,170.4,-47.79,190.7,-47.73
2018-04-19 11:00:00,212.7,-48.24,306.2,-48.59,105.8,-47.67,99.2,-47.65
2018-04-19 12:00:00,84.2,-47.75,63.6,-47.64,56.6,-47.55,45.9,-47.58
2018-04-19 13:00:00,63.4,-47.66,47.6,-47.57,49.5,-47.53,40.6,-47.58
2018-04-19 14:00:00,61.9,-47.66,51.6,-47.6,49.1,-47.53,41.6,-47.59
2018-04-19 15:00:00,63.1,-47.66,50.3,-47.59,49.9,-47.53,42.2,-47.59
2018-04-19 16:00:00,67.4,-47.69,53.5,-47.61,53.1,-47.54,45.0,-47.6
2018-04-19 17:00:00,87.7,-47.79,67.9,-47.68,67.6,-47.59,53.7,-47.65
2018-04-19 18:00:00,118.8,-47.91,89.1,-47.75,83.9,-47.61,66.5,-47.66
2018-04-19 19:00:00,217.1,-48.27,155.4,-47.94,134.2,-47.6,103.6,-47.64
2018-04-19 20:00:00,245.3,-48.36,168.9,-47.96,147.5,-47.6,118.5,-47.62
2018-04-19 21:00:00,257.8,-48.39,171.9,-47.93,156.8,-47.58,130.4,-47.58
2018-04-19 22:00:00,278.6,-48.44,192.6,-47.98,176.5,-47.58,142.4,-47.57
2018-04-19 23:00:00,278.3,-48.44,200.4,-48.02,189.2,-47.66,144.0,-47.58
2018-04-20 00:00:00,301.8,-48.51,217.0,-48.04,209.9,-47.71,165.3,-47.55
2018-04-20 01:00:00,329.7,-48.58,245.6,-48.1,229.0,-47.71,199.2,-47.58
2018-04-20 02:00:00,345.8,-48.6,278.4,-48.2,243.7,-47.67,240.3,-47.72
2018-04-20 03:00:00,343.5,-48.59,302.0,-48.29,240.9,-47.66,263.7,-47.81
2018-04-20 04:00:00,350.3,-48.62,306.2,-48.3,241.1,-47.67,268.2,-47.8
2018-04-20 05:00:00,369.3,-48.67,326.9,-48.36,248.3,-47.65,288.5,-47.81
2018-04-20 06:00:00,366.3,-48.68,325.2,-48.4,232.6,-47.65,294.7,-47.89
2018-04-20 07:00:00,322.6,-48.61,292.3,-48.44,172.2,-47.79,228.1,-47.92
2018-04-20 08:00:00,281.1,-48.5,275.4,-48.47,145.1,-47.93,195.1,-48.05
2018-04-20 09:00:00,243.2,-48.32,250.2,-48.35,132.5,-47.91,188.2,-48.12
2018-04-20 10:00:00,186.1,-48.1,199.4,-48.14,110.4,-47.85,153.3,-48.05
2018-04-20 11:00:00,134.2,-47.92,149.4,-47.97,90.6,-47.77,123.1,-47.96
2018-04-20 12:00:00,97.0,-47.8,108.4,-47.84,69.7,-47.68,92.4,-47.83
2018-04-20 13:00:00,83.7,-47.76,86.6,-47.77,59.2,-47.63,76.0,-47.76
2018-04-20 14:00:00,78.3,-47.74,80.1,-47.75,54.5,-47.61,70.1,-47.73
2018-04-20 15:00:00,75.6,-47.73,72.4,-47.71,51.4,-47.59,64.8,-47.71
2018-04-20 16:00:00,75.4,-47.72,72.0,-47.71,49.5,-47.59,60.7,-47.69
2018-04-20 17:00:00,80.9,-47.75,73.0,-47.72,50.9,-47.59,60.5,-47.68
2018-04-20 18:00:00,97.1,-47.81,81.0,-47.75,54.2,-47.61,64.0,-47.7
2018-04-20 19:00:00,132.7,-47.95,95.5,-47.81,63.6,-47.63,78.6,-47.71
2018-04-20 20:00:00,173.3,-48.11,196.7,-48.23,74.2,-47.65,99.2,-47.72
2018-04-20 21:00:00,205.8,-48.23,334.1,-48.72,102.3,-47.75,167.3,-48.06
2018-04-20 22:00:00,172.3,-48.1,312.8,-48.65,86.6,-47.67,142.4,-47.95
2018-04-20 23:00:00,178.5,-48.12,348.9,-48.77,84.1,-47.64,151.9,-47.96
2018-04-21 00:00:00,188.8,-48.16,367.0,-48.82,84.3,-47.64,158.3,-47.97
2018-04-21 01:00:00,183.3,-48.13,350.7,-48.77,81.3,-47.63,154.9,-47.97
2018-04-21 02:00:00,196.7,-48.17,374.4,-48.84,84.5,-47.64,160.2,-47.95
2018-04-21 03:00:00,205.1,-48.19,384.0,-48.86,86.8,-47.64,157.5,-47.91
2018-04-21 04:00:00,208.6,-48.19,388.3,-48.87,88.6,-47.65,163.6,-47.93
2018-04-21 05:00:00,224.3,-48.24,418.4,-48.96,93.0,-47.66,168.7,-47.93
2018-04-21 06:00:00,222.6,-48.22,401.1,-48.89,91.2,-47.66,166.0,-47.92
2018-04-21 07:00:00,201.9,-48.14,356.6,-48.72,83.9,-47.64,157.7,-47.9
2018-04-21 08:00:00,189.6,-48.09,316.3,-48.59,80.9,-47.64,132.6,-47.82
2018-04-21 09:00:00,182.2,-48.06,289.0,-48.5,81.8,-47.64,111.9,-47.72
2018-04-21 10:00:00,175.6,-48.06,253.9,-48.39,86.5,-47.66,103.8,-47.71
2018-04-21 11:00:00,141.9,-47.97,176.6,-48.11,85.1,-47.67,93.0,-47.75
2018-04-21 12:00:00,100.5,-47.83,90.1,-47.78,71.9,-47.65,68.5,-47.7
2018-04-21 13:00:00,81.6,-47.75,67.7,-47.69,63.4,-47.62,55.5,-47.69
2018-04-21 14:00:00,85.7,-47.78,69.8,-47.7,64.2,-47.63,57.4,-47.68
2018-04-21 15:00:00,124.9,-47.89,165.3,-48.06,74.1,-47.64,87.5,-47.74
2018-04-21 16:00:00,184.2,-48.07,287.4,-48.48,92.7,-47.68,133.0,-47.83
2018-04-21 17:00:00,205.0,-48.19,311.5,-48.62,105.2,-47.72,111.7,-47.77
2018-04-21 18:00:00,233.7,-48.33,383.2,-48.89,117.9,-47.76,115.2,-47.78
2018-04-21 19:00:00,278.3,-48.48,470.4,-49.15,135.2,-47.8,147.2,-47.88
2018-04-21 20:00:00,299.1,-48.55,379.1,-48.83,150.9,-47.83,151.7,-47.82
2018-04-21 21:00:00,177.3,-48.11,155.4,-47.96,104.6,-47.64,101.5,-47.64
2018-04-21 22:00:00,303.4,-48.55,616.8,-49.54,144.9,-47.76,151.2,-47.7
2018-04-21 23:00:00,298.6,-48.54,332.9,-48.62,140.2,-47.76,140.7,-47.62
2018-04-22 00:00:00,247.1,-48.33,217.0,-48.11,130.0,-47.62,126.8,-47.5
2018-04-22 01:00:00,358.2,-48.71,649.9,-49.6,155.1,-47.77,189.8,-47.7
2018-04-22 02:00:00,400.7,-48.85,639.3,-49.58,168.1,-47.81,263.3,-48.12
2018-04-22 03:00:00,460.8,-49.03,818.0,-50.02,188.0,-47.85,242.4,-47.98
2018-04-22 04:00:00,472.1,-49.06,845.0,-50.09,195.2,-47.86,224.0,-47.88
2018-04-22 05:00:00,383.3,-48.8,519.1,-49.21,177.2,-47.83,180.0,-47.73
2018-04-22 06:00:00,256.1,-48.39,159.9,-47.95,140.5,-47.76,137.0,-47.7
2018-04-22 07:00:00,164.5,-48.05,141.4,-47.91,107.2,-47.64,109.7,-47.72
2018-04-22 08:00:00,137.7,-47.96,139.3,-47.94,97.9,-47.63,88.9,-47.75
2018-04-22 09:00:00,118.0,-47.9,103.4,-47.83,92.4,-47.66,73.2,-47.77
2018-04-22 10:00:00,107.8,-47.87,87.2,-47.78,86.7,-47.68,67.6,-47.79
2018-04-22 11:00:00,87.5,-47.77,70.6,-47.72,72.4,-47.63,55.3,-47.75
2018-04-22 12:00:00,75.1,-47.7,51.2,-47.61,64.5,-47.58,43.7,-47.67
2018-04-22 13:00:00,75.4,-47.69,48.6,-47.6,65.9,-47.58,41.6,-47.66
2018-04-22 14:00:00,67.5,-47.66,46.9,-47.58,60.8,-47.58,40.6,-47.63
2018-04-22 15:00:00,68.7,-47.67,49.6,-47.61,63.6,-47.59,43.5,-47.65
2018-04-22 16:00:00,81.5,-47.77,80.1,-47.79,84.1,-47.72,82.6,-47.89
2018-04-22 17:00:00,79.9,-47.78,81.0,-47.81,82.4,-47.74,86.4,-47.94
2018-04-22 18:00:00,71.0,-47.74,69.8,-47.74,67.8,-47.67,69.1,-47.84
2018-04-22 19:00:00,56.7,-47.65,53.3,-47.63,47.8,-47.55,47.9,-47.72
2018-04-22 20:00:00,55.0,-47.64,51.6,-47.62,46.1,-47.54,46.3,-47.76
2018-04-22 21:00:00,61.8,-47.68,58.6,-47.65,50.4,-47.55,50.3,-47.81
2018-04-22 22:00:00,64.7,-47.69,60.4,-47.65,51.3,-47.56,49.0,-47.82
2018-04-22 23:00:00,76.5,-47.74,74.1,-47.71,62.5,-47.59,73.7,-47.94
2018-04-23 00:00:00,81.7,-47.77,80.0,-47.75,67.3,-47.62,76.6,-48.0
2018-04-23 01:00:00,82.0,-47.78,82.3,-47.76,67.1,-47.62,71.8,-47.98
2018-04-23 02:00:00,80.7,-47.77,81.6,-47.76,67.1,-47.62,68.3,-47.97
2018-04-23 03:00:00,78.6,-47.77,78.6,-47.75,66.1,-47.62,68.1,-47.97
2018-04-23 04:00:00,75.2,-47.75,71.2,-47.71,61.8,-47.61,61.5,-47.91
2018-04-23 05:00:00,79.3,-47.75,72.5,-47.7,63.9,-47.6,63.6,-47.89
2018-04-23 06:00:00,80.9,-47.75,71.1,-47.69,69.3,-47.6,55.5,-47.83
2018-04-23 07:00:00,69.2,-47.7,67.6,-47.69,67.9,-47.61,60.5,-47.85
2018-04-23 08:00:00,51.1,-47.62,51.4,-47.62,45.7,-47.54,47.6,-47.73
2018-04-23 09:00:00,48.2,-47.6,44.6,-47.59,44.0,-47.54,40.0,-47.69
2018-04-23 10:00:00,39.7,-47.55,33.9,-47.53,35.2,-47.5,31.5,-47.61
2018-04-23 11:00:00,38.0,-47.54,30.0,-47.51,32.9,-47.49,25.4,-47.58
2018-04-23 12:00:00,37.5,-47.54,24.1,-47.49,33.3,-47.49,21.3,-47.57
2018-04-23 13:00:00,38.0,-47.55,25.2,-47.5,35.7,-47.51,21.6,-47.58
2018-04-23 14:00:00,36.3,-47.55,25.2,-47.5,34.2,-47.5,21.0,-47.58
2018-04-23 15:00:00,38.3,-47.56,27.6,-47.51,35.6,-47.52,22.3,-47.6
2018-04-23 16:00:00,38.7,-47.57,28.4,-47.52,36.2,-47.53,23.2,-47.62
2018-04-23 17:00:00,40.6,-47.58,29.5,-47.52,37.6,-47.53,24.1,-47.61
2018-04-23 18:00:00,52.1,-47.63,38.7,-47.56,47.2,-47.56,29.9,-47.66
2018-04-23 19:00:00,70.9,-47.71,46.3,-47.58,53.4,-47.55,35.5,-47.69
2018-04-23 20:00:00,77.8,-47.73,49.6,-47.58,50.0,-47.51,32.4,-47.64
2018-04-23 21:00:00,78.5,-47.73,51.1,-47.58,49.6,-47.5,34.3,-47.63
2018-04-23 22:00:00,83.6,-47.76,57.8,-47.61,53.4,-47.52,38.0,-47.69
2018-04-23 23:00:00,89.6,-47.79,65.4,-47.65,59.4,-47.55,44.6,-47.76
2018-04-24 00:00:00,95.9,-47.82,70.4,-47.67,64.1,-47.56,48.1,-47.78
2018-04-24 01:00:00,84.6,-47.77,69.1,-47.67,63.7,-47.56,47.7,-47.77
2018-04-24 02:00:00,70.5,-47.72,64.1,-47.69,66.0,-47.63,46.8,-47.84
2018-04-24 03:00:00,70.2,-47.73,63.1,-47.69,65.5,-47.64,49.3,-47.84
2018-04-24 04:00:00,70.3,-47.72,66.3,-47.71,66.9,-47.63,58.0,-47.85
2018-04-24 05:00:00,70.9,-47.72,64.9,-47.69,63.5,-47.6,57.0,-47.81
2018-04-24 06:00:00,67.9,-47.7,61.8,-47.66,58.4,-47.56,58.8,-47.76
2018-04-24 07:00:00,55.7,-47.63,52.5,-47.6,47.2,-47.52,45.5,-47.66
2018-04-24 08:00:00,51.5,-47.61,48.2,-47.58,43.3,-47.5,43.7,-47.64
2018-04-24 09:00:00,46.7,-47.59,47.8,-47.58,40.1,-47.49,44.1,-47.64
2018-04-24 10:00:00,46.4,-47.6,47.6,-47.6,42.1,-47.51,40.8,-47.66
2018-04-24 11:00:00,48.3,-47.62,45.2,-47.62,46.0,-47.55,48.0,-47.76
2018-04-24 12:00:00,47.7,-47.63,46.7,-47.64,38.2,-47.55,43.0,-47.78
2018-04-24 13:00:00,33.7,-47.55,26.2,-47.51,23.8,-47.47,16.6,-47.62
2018-04-24 14:00:00,34.6,-47.55,23.6,-47.49,24.1,-47.47,14.7,-47.64
2018-04-24 15:00:00,35.1,-47.55,22.5,-47.48,23.8,-47.45,14.7,-47.59
2018-04-24 16:00:00,36.1,-47.55,22.1,-47.47,23.0,-47.44,13.8,-47.57
2018-04-24 17:00:00,38.0,-47.55,22.5,-47.47,23.6,-47.44,14.5,-47.56
2018-04-24 18:00:00,43.1,-47.57,25.4,-47.47,26.0,-47.44,16.9,-47.55
2018-04-24 19:00:00,45.1,-47.58,27.9,-47.48,27.0,-47.44,18.9,-47.55
2018-04-24 20:00:00,42.3,-47.56,26.1,-47.47,24.7,-47.43,16.7,-47.53
2018-04-24 21:00:00,39.0,-47.54,22.6,-47.45,22.3,-47.41,14.7,-47.48
2018-04-24 22:00:00,36.2,-47.53,25.1,-47.47,26.2,-47.43,17.8,-47.48
2018-04-24 23:00:00,40.5,-47.56,34.5,-47.52,35.6,-47.49,31.4,-47.55
2018-04-25 00:00:00,50.0,-47.61,48.4,-47.6,38.1,-47.5,43.2,-47.64
2018-04-25 01:00:00,61.8,-47.67,47.2,-47.6,40.5,-47.51,38.5,-47.65
2018-04-25 02:00:00,78.2,-47.75,59.2,-47.65,49.4,-47.53,50.5,-47.67
2018-04-25 03:00:00,89.2,-47.8,87.7,-47.79,61.1,-47.58,82.8,-47.8
2018-04-25 04:00:00,87.1,-47.78,95.7,-47.84,65.8,-47.6,84.9,-47.83
2018-04-25 05:00:00,86.1,-47.77,92.8,-47.8,69.0,-47.61,83.2,-47.82
2018-04-25 06:00:00,71.1,-47.7,68.1,-47.68,61.7,-47.58,55.3,-47.7
2018-04-25 07:00:00,56.7,-47.64,62.4,-47.68,48.3,-47.55,57.3,-47.74
2018-04-25 08:00:00,42.8,-47.57,56.9,-47.66,34.7,-47.5,50.8,-47.7
2018-04-25 09:00:00,34.3,-47.53,48.7,-47.62,28.2,-47.47,42.7,-47.66
2018-04-25 10:00:00,31.6,-47.51,36.0,-47.54,26.8,-47.47,31.7,-47.58
2018-04-25 11:00:00,29.3,-47.51,27.3,-47.5,24.8,-47.47,26.6,-47.56
2018-04-25 12:00:00,29.5,-47.51,22.2,-47.47,25.3,-47.45,21.1,-47.52
2018-04-25 13:00:00,29.4,-47.51,20.1,-47.46,26.6,-47.46,16.2,-47.51
2018-04-25 14:00:00,26.9,-47.5,18.2,-47.46,23.9,-47.45,14.8,-47.5
2018-04-25 15:00:00,28.2,-47.51,20.0,-47.47,26.9,-47.47,16.8,-47.52
2018-04-25 16:00:00,34.3,-47.53,23.5,-47.48,29.8,-47.47,19.6,-47.51
2018-04-25 17:00:00,36.6,-47.54,25.6,-47.48,32.1,-47.47,21.2,-47.5
2018-04-25 18:00:00,34.1,-47.51,26.1,-47.47,26.6,-47.43,28.3,-47.5
2018-04-25 19:00:00,33.1,-47.51,25.5,-47.46,24.9,-47.43,21.8,-47.47
2018-04-25 20:00:00,41.0,-47.54,33.2,-47.49,31.4,-47.44,32.0,-47.51
2018-04-25 21:00:00,44.5,-47.56,35.6,-47.5,34.2,-47.45,37.9,-47.54
2018-04-25 22:00:00,47.7,-47.57,38.3,-47.52,37.5,-47.46,38.8,-47.55
2018-04-25 23:00:00,47.5,-47.57,36.4,-47.51,36.7,-47.46,38.9,-47.56
2018-04-26 00:00:00,50.6,-47.59,37.2,-47.52,42.0,-47.48,36.2,-47.56
2018-04-26 01:00:00,57.1,-47.62,44.4,-47.54,47.1,-47.49,46.8,-47.6
2018-04-26 02:00:00,61.3,-47.63,50.6,-47.56,47.9,-47.49,55.6,-47.63
2018-04-26 03:00:00,65.0,-47.64,52.3,-47.57,53.4,-47.5,40.7,-47.55
2018-04-26 04:00:00,65.7,-47.65,51.5,-47.57,60.2,-47.53,34.5,-47.53
2018-04-26 05:00:00,70.7,-47.68,55.2,-47.59,65.5,-47.55,40.9,-47.56
2018-04-26 06:00:00,63.7,-47.66,48.0,-47.58,59.0,-47.55,37.2,-47.56
2018-04-26 07:00:00,51.9,-47.61,42.0,-47.55,49.2,-47.53,35.1,-47.57
2018-04-26 08:00:00,39.4,-47.55,34.1,-47.53,37.1,-47.5,29.7,-47.55
2018-04-26 09:00:00,37.0,-47.54,33.2,-47.53,36.3,-47.5,33.1,-47.58
2018-04-26 10:00:00,33.7,-47.53,28.2,-47.5,32.7,-47.49,27.6,-47.56
2018-04-26 11:00:00,27.7,-47.5,20.7,-47.46,23.8,-47.45,20.2,-47.51
2018-04-26 12:00:00,25.8,-47.48,17.7,-47.45,21.4,-47.43,16.5,-47.49
2018-04-26 13:00:00,24.4,-47.48,17.2,-47.44,20.3,-47.43,18.3,-47.49
2018-04-26 14:00:00,22.2,-47.47,15.1,-47.44,18.3,-47.43,13.2,-47.49
2018-04-26 15:00:00,23.2,-47.47,15.8,-47.44,19.3,-47.43,13.9,-47.48
2018-04-26 16:00:00,24.2,-47.48,17.0,-47.44,19.8,-47.44,17.5,-47.5
2018-04-26 17:00:00,32.9,-47.52,21.0,-47.46,27.2,-47.45,17.3,-47.49
2018-04-26 18:00:00,54.6,-47.61,31.1,-47.49,36.1,-47.46,24.9,-47.49
2018-04-26 19:00:00,71.5,-47.67,39.0,-47.5,41.7,-47.44,26.1,-47.44
2018-04-26 20:00:00,90.5,-47.74,46.0,-47.5,53.1,-47.43,35.7,-47.42
2018-04-26 21:00:00,95.7,-47.76,53.7,-47.53,61.6,-47.45,44.8,-47.45
2018-04-26 22:00:00,104.8,-47.8,59.6,-47.55,66.6,-47.46,49.0,-47.45
2018-04-26 23:00:00,120.4,-47.86,66.8,-47.57,67.7,-47.45,48.6,-47.44
2018-04-27 00:00:00,126.7,-47.89,77.9,-47.63,67.5,-47.45,49.6,-47.44
2018-04-27 01:00:00,137.8,-47.94,96.2,-47.7,70.6,-47.45,54.1,-47.45
2018-04-27 02:00:00,126.0,-47.9,101.0,-47.74,64.9,-47.46,51.1,-47.47
2018-04-27 03:00:00,102.6,-47.8,80.7,-47.67,53.9,-47.46,39.8,-47.44
2018-04-27 04:00:00,108.6,-47.82,69.5,-47.62,49.5,-47.47,37.0,-47.41
2018-04-27 05:00:00,83.7,-47.72,39.2,-47.49,34.1,-47.45,24.1,-47.36
2018-04-27 06:00:00,98.1,-47.78,113.4,-47.83,37.3,-47.46,31.1,-47.38
2018-04-27 07:00:00,130.3,-47.91,286.9,-48.53,48.0,-47.48,58.9,-47.5
2018-04-27 08:00:00,120.7,-47.87,237.2,-48.35,43.3,-47.47,65.1,-47.56
2018-04-27 09:00:00,117.1,-47.86,225.1,-48.31,44.9,-47.48,50.6,-47.5
2018-04-27 10:00:00,112.2,-47.85,206.3,-48.25,50.6,-47.52,50.2,-47.55
2018-04-27 11:00:00,109.1,-47.86,179.3,-48.18,60.1,-47.59,59.2,-47.65
2018-04-27 12:00:00,116.1,-47.89,135.7,-47.98,67.4,-47.6,67.6,-47.65
2018-04-27 13:00:00,109.4,-47.84,65.0,-47.62,63.9,-47.57,60.9,-47.58
2018-04-27 14:00:00,106.2,-47.84,86.2,-47.72,59.1,-47.56,57.8,-47.57
2018-04-27 15:00:00,141.4,-47.96,268.2,-48.46,76.0,-47.58,84.8,-47.67
2018-04-27 16:00:00,194.5,-48.15,342.2,-48.7,102.9,-47.61,117.1,-47.75
2018-04-27 17:00:00,177.9,-48.1,316.0,-48.62,86.3,-47.6,99.5,-47.68
2018-04-27 18:00:00,130.7,-47.93,143.5,-47.96,66.0,-47.57,67.3,-47.58
2018-04-27 19:00:00,116.8,-47.89,62.1,-47.61,57.3,-47.55,51.5,-47.51
2018-04-27 20:00:00,150.2,-48.02,109.5,-47.8,66.9,-47.57,61.4,-47.48
2018-04-27 21:00:00,207.3,-48.23,228.4,-48.28,88.7,-47.62,81.9,-47.52
2018-04-27 22:00:00,198.7,-48.2,196.5,-48.16,84.7,-47.61,74.2,-47.5
2018-04-27 23:00:00,185.8,-48.15,242.8,-48.36,80.1,-47.6,69.1,-47.5
2018-04-28 00:00:00,237.1,-48.33,427.3,-49.01,97.4,-47.63,102.9,-47.58
2018-04-28 01:00:00,248.5,-48.37,439.1,-49.03,98.7,-47.64,137.5,-47.69
2018-04-28 02:00:00,232.8,-48.31,203.3,-48.15,82.5,-47.61,113.5,-47.54
2018-04-28 03:00:00,200.1,-48.01,129.8,-47.67,88.0,-47.6,108.1,-47.52
2018-04-28 04:00:00,172.3,-47.91,107.7,-47.64,85.8,-47.58,93.0,-47.57
2018-04-28 05:00:00,141.9,-47.85,82.4,-47.58,69.5,-47.56,70.3,-47.52
2018-04-28 06:00:00,110.3,-47.74,64.4,-47.53,50.7,-47.52,53.3,-47.48
2018-04-28 07:00:00,92.4,-47.73,49.4,-47.52,41.2,-47.5,39.0,-47.46
2018-04-28 08:00:00,94.9,-47.75,47.3,-47.53,42.0,-47.51,39.0,-47.48
2018-04-28 09:00:00,86.3,-47.71,47.9,-47.53,41.1,-47.51,40.5,-47.49
2018-04-28 10:00:00,75.2,-47.67,46.0,-47.53,37.9,-47.5,37.9,-47.49
2018-04-28 11:00:00,75.1,-47.67,48.2,-47.55,39.1,-47.5,39.3,-47.49
2018-04-28 12:00:00,83.2,-47.71,50.0,-47.55,40.6,-47.5,40.7,-47.49
2018-04-28 13:00:00,80.0,-47.69,50.3,-47.55,39.6,-47.5,41.6,-47.49
2018-04-28 14:00:00,79.8,-47.68,51.0,-47.54,40.7,-47.5,42.1,-47.49
2018-04-28 15:00:00,91.9,-47.72,58.4,-47.54,45.2,-47.52,48.9,-47.49
2018-04-28 16:00:00,107.3,-47.77,68.7,-47.56,54.1,-47.55,58.4,-47.53
2018-04-28 17:00:00,113.1,-47.77,75.6,-47.58,52.8,-47.55,60.1,-47.51
2018-04-28 18:00:00,106.7,-47.73,67.7,-47.55,47.7,-47.54,54.6,-47.5
2018-04-28 19:00:00,104.1,-47.73,67.7,-47.56,45.3,-47.53,52.5,-47.49
2018-04-28 20:00:00,113.1,-47.77,72.0,-47.58,48.5,-47.54,54.2,-47.49
2018-04-28 21:00:00,127.2,-47.83,76.3,-47.59,51.1,-47.54,56.4,-47.48
2018-04-28 22:00:00,115.3,-47.8,68.0,-47.58,46.2,-47.53,51.5,-47.49
2018-04-28 23:00:00,103.7,-47.77,65.7,-47.6,43.8,-47.53,48.4,-47.5
2018-04-29 00:00:00,103.6,-47.78,74.1,-47.65,45.8,-47.54,49.7,-47.52
2018-04-29 01:00:00,99.2,-47.77,83.9,-47.71,47.1,-47.56,54.2,-47.57
2018-04-29 02:00:00,98.4,-47.77,96.0,-47.76,50.5,-47.58,59.6,-47.61
2018-04-29 03:00:00,102.5,-47.78,100.8,-47.79,51.1,-47.57,59.5,-47.6
2018-04-29 04:00:00,105.1,-47.8,73.5,-47.65,47.8,-47.55,51.6,-47.54
2018-04-29 05:00:00,93.2,-47.74,60.6,-47.6,41.0,-47.51,44.0,-47.51
2018-04-29 06:00:00,78.4,-47.68,56.6,-47.59,34.2,-47.49,35.3,-47.48
2018-04-29 07:00:00,68.4,-47.63,60.2,-47.59,30.2,-47.46,34.0,-47.47
2018-04-29 08:00:00,63.8,-47.61,58.9,-47.58,31.0,-47.46,32.7,-47.47
2018-04-29 09:00:00,58.3,-47.59,47.0,-47.54,27.7,-47.46,27.9,-47.46
2018-04-29 10:00:00,53.9,-47.57,44.2,-47.53,24.1,-47.45,25.5,-47.46
2018-04-29 11:00:00,52.9,-47.56,41.0,-47.51,23.2,-47.44,24.6,-47.44
2018-04-29 12:00:00,52.3,-47.56,34.6,-47.48,23.8,-47.45,22.7,-47.43
2018-04-29 13:00:00,48.0,-47.54,33.6,-47.48,21.2,-47.43,21.4,-47.42
2018-04-29 14:00:00,47.3,-47.52,35.1,-47.46,20.0,-47.42,22.8,-47.4
2018-04-29 15:00:00,48.6,-47.53,31.5,-47.44,19.3,-47.42,21.9,-47.39
2018-04-29 16:00:00,47.3,-47.52,30.6,-47.43,17.9,-47.41,20.6,-47.37
2018-04-29 17:00:00,47.8,-47.52,36.1,-47.46,17.7,-47.41,20.8,-47.38
2018-04-29 18:00:00,51.6,-47.54,36.1,-47.47,19.5,-47.42,21.5,-47.39
2018-04-29 19:00:00,49.9,-47.55,29.8,-47.45,19.2,-47.42,19.2,-47.39
2018-04-29 20:00:00,49.3,-47.55,23.6,-47.43,16.8,-47.41,16.4,-47.37
2018-04-29 21:00:00,50.1,-47.55,22.1,-47.42,16.7,-47.41,17.5,-47.38
2018-04-29 22:00:00,46.0,-47.53,20.5,-47.4,16.2,-47.4,17.6,-47.37
2018-04-29 23:00:00,46.2,-47.53,19.8,-47.4,16.6,-47.39,17.7,-47.36
2018-04-30 00:00:00,45.3,-47.52,20.7,-47.39,16.7,-47.38,17.9,-47.36
2018-04-30 01:00:00,42.1,-47.5,20.8,-47.4,16.5,-47.39,16.4,-47.37
2018-04-30 02:00:00,41.9,-47.49,19.8,-47.38,14.8,-47.39,16.9,-47.37
2018-04-30 03:00:00,42.4,-47.48,22.0,-47.37,13.7,-47.4,17.1,-47.35
2018-04-30 04:00:00,46.2,-47.49,24.0,-47.38,13.9,-47.4,16.4,-47.36
2018-04-30 05:00:00,45.2,-47.48,21.0,-47.37,12.7,-47.39,16.2,-47.34
2018-04-30 06:00:00,43.5,-47.48,20.2,-47.37,12.7,-47.38,15.3,-47.34
2018-04-30 07:00:00,41.3,-47.48,17.1,-47.37,13.3,-47.38,13.9,-47.36
2018-04-30 08:00:00,41.9,-47.48,17.4,-47.37,14.4,-47.38,15.2,-47.35
2018-04-30 09:00:00,38.0,-47.47,15.6,-47.37,14.7,-47.37,13.4,-47.37
2018-04-30 10:00:00,31.7,-47.47,11.8,-47.38,12.1,-47.38,9.8,-47.38
2018-04-30 11:00:00,29.7,-47.48,11.3,-47.39,11.4,-47.39,8.9,-47.38
2018-04-30 12:00:00,30.0,-47.48,13.5,-47.41,12.4,-47.39,10.5,-47.37
2018-04-30 13:00:00,30.3,-47.49,14.8,-47.41,12.2,-47.39,11.0,-47.37
2018-04-30 14:00:00,27.9,-47.47,13.1,-47.41,12.1,-47.38,10.8,-47.38
2018-04-30 15:00:00,33.0,-47.5,15.1,-47.41,13.2,-47.39,12.0,-47.38
2018-04-30 16:00:00,56.1,-47.59,20.4,-47.41,18.6,-47.4,17.2,-47.35
2018-04-30 17:00:00,82.3,-47.69,31.2,-47.44,27.7,-47.42,27.0,-47.34
2018-04-30 18:00:00,63.1,-47.59,34.3,-47.43,25.7,-47.41,30.2,-47.33
2018-04-30 19:00:00,59.6,-47.55,33.8,-47.42,24.5,-47.41,29.4,-47.34
2018-04-30 20:00:00,86.3,-47.63,47.2,-47.42,35.2,-47.42,42.5,-47.3
2018-04-30 21:00:00,131.5,-47.8,77.1,-47.5,57.9,-47.41,74.6,-47.35
2018-04-30 22:00:00,166.9,-47.95,117.5,-47.66,79.0,-47.4,100.9,-47.42
2018-04-30 23:00:00,232.9,-48.2,206.8,-48.0,128.6,-47.49,183.7,-47.6
2018-05-01 00:00:00,241.1,-48.24,207.0,-47.98,144.3,-47.55,186.8,-47.64
2018-05-01 01:00:00,229.6,-48.23,180.8,-47.93,134.4,-47.52,165.1,-47.63
2018-05-01 02:00:00,220.9,-48.23,182.5,-47.98,135.3,-47.55,168.5,-47.72
2018-05-01 03:00:00,214.0,-48.2,201.0,-48.07,143.3,-47.59,182.3,-47.78
2018-05-01 04:00:00,197.8,-48.16,203.5,-48.12,139.0,-47.63,174.0,-47.83
2018-05-01 05:00:00,206.3,-48.19,201.3,-48.11,142.1,-47.62,166.1,-47.8
2018-05-01 06:00:00,189.9,-48.13,197.3,-48.11,134.0,-47.6,157.9,-47.81
2018-05-01 07:00:00,155.8,-48.02,188.0,-48.14,123.3,-47.63,167.5,-47.98
2018-05-01 08:00:00,98.1,-47.81,126.0,-47.96,87.4,-47.62,112.0,-47.9
2018-05-01 09:00:00,60.9,-47.66,74.4,-47.74,53.0,-47.54,64.6,-47.75
2018-05-01 10:00:00,54.2,-47.65,63.3,-47.7,47.1,-47.57,52.5,-47.73
2018-05-01 11:00:00,56.1,-47.69,58.9,-47.71,52.0,-47.63,51.7,-47.84
2018-05-01 12:00:00,47.6,-47.65,46.6,-47.65,41.8,-47.6,43.0,-47.78
2018-05-01 13:00:00,52.5,-47.66,55.2,-47.69,43.7,-47.6,48.2,-47.78
2018-05-01 14:00:00,44.5,-47.61,41.3,-47.59,34.2,-47.54,34.0,-47.66
2018-05-01 15:00:00,46.6,-47.61,41.3,-47.59,34.6,-47.54,33.5,-47.66
2018-05-01 16:00:00,48.1,-47.61,40.2,-47.58,35.0,-47.53,32.4,-47.64
2018-05-01 17:00:00,45.2,-47.6,35.5,-47.55,31.8,-47.51,28.6,-47.61
2018-05-01 18:00:00,55.1,-47.64,41.4,-47.57,36.1,-47.51,31.1,-47.61
2018-05-01 19:00:00,79.0,-47.74,52.2,-47.6,45.9,-47.53,37.1,-47.61
2018-05-01 20:00:00,100.6,-47.83,70.3,-47.67,54.6,-47.55,46.2,-47.6
2018-05-01 21:00:00,124.5,-47.93,73.1,-47.67,63.4,-47.59,52.1,-47.61
2018-05-01 22:00:00,134.3,-47.97,72.6,-47.67,69.5,-47.62,59.0,-47.61
2018-05-01 23:00:00,132.5,-47.97,72.5,-47.67,68.9,-47.63,55.3,-47.61
2018-05-02 00:00:00,129.8,-47.98,70.8,-47.68,69.6,-47.63,53.2,-47.65
2018-05-02 01:00:00,104.4,-47.89,69.6,-47.71,60.1,-47.61,47.2,-47.69
2018-05-02 02:00:00,75.6,-47.75,56.2,-47.65,44.4,-47.54,31.1,-47.61
2018-05-02 03:00:00,69.7,-47.73,51.1,-47.63,41.5,-47.54,28.6,-47.61
2018-05-02 04:00:00,66.7,-47.73,43.6,-47.62,41.7,-47.57,30.3,-47.67
2018-05-02 05:00:00,57.9,-47.69,39.6,-47.6,37.4,-47.55,26.0,-47.64
2018-05-02 06:00:00,60.4,-47.7,38.8,-47.59,37.9,-47.55,28.5,-47.65
2018-05-02 07:00:00,64.2,-47.72,37.5,-47.59,40.2,-47.57,29.6,-47.67
2018-05-02 08:00:00,59.9,-47.7,35.7,-47.58,38.2,-47.56,27.7,-47.65
2018-05-02 09:00:00,61.5,-47.7,40.7,-47.6,39.3,-47.56,28.8,-47.65
2018-05-02 10:00:00,70.2,-47.75,42.6,-47.62,45.5,-47.6,33.5,-47.7
2018-05-02 11:00:00,70.4,-47.77,48.2,-47.66,49.8,-47.63,34.4,-47.75
2018-05-02 12:00:00,74.8,-47.77,53.1,-47.66,49.6,-47.59,32.6,-47.7
2018-05-02 13:00:00,73.4,-47.74,55.0,-47.64,54.5,-47.57,41.2,-47.71
2018-05-02 14:00:00,72.1,-47.77,66.8,-47.76,53.6,-47.63,57.7,-47.87
2018-05-02 15:00:00,74.5,-47.74,75.7,-47.74,39.6,-47.54,46.2,-47.68
2018-05-02 16:00:00,64.1,-47.67,62.1,-47.66,30.3,-47.47,35.3,-47.56
2018-05-02 17:00:00,58.0,-47.65,52.7,-47.62,28.6,-47.46,33.2,-47.56
2018-05-02 18:00:00,65.2,-47.69,55.7,-47.64,32.3,-47.49,39.2,-47.59
2018-05-02 19:00:00,100.7,-47.83,73.2,-47.68,47.8,-47.51,58.5,-47.55
2018-05-02 20:00:00,211.3,-48.21,120.7,-47.72,94.8,-47.49,109.9,-47.38
2018-05-02 21:00:00,298.0,-48.45,196.6,-47.88,149.9,-47.4,184.2,-47.42
2018-05-02 22:00:00,294.6,-48.41,263.9,-48.14,183.7,-47.43,240.1,-47.65
2018-05-02 23:00:00,256.6,-48.31,239.4,-48.12,170.2,-47.53,226.6,-47.72
2018-05-03 00:00:00,287.3,-48.42,235.1,-48.06,179.0,-47.57,217.8,-47.6
2018-05-03 01:00:00,327.8,-48.53,261.9,-48.09,207.7,-47.54,246.3,-47.67
2018-05-03 02:00:00,348.1,-48.59,279.5,-48.14,221.0,-47.55,237.8,-47.67
2018-05-03 03:00:00,364.7,-48.65,286.5,-48.15,226.3,-47.56,240.8,-47.65
2018-05-03 04:00:00,338.7,-48.59,266.0,-48.13,213.6,-47.57,210.1,-47.66
2018-05-03 05:00:00,302.3,-48.49,253.9,-48.15,197.7,-47.59,187.8,-47.71
2018-05-03 06:00:00,261.0,-48.37,224.6,-48.11,178.0,-47.62,178.7,-47.85
2018-05-03 07:00:00,213.7,-48.22,200.5,-48.08,152.6,-47.6,158.6,-47.88
2018-05-03 08:00:00,184.1,-48.13,175.8,-48.03,129.1,-47.6,140.1,-47.89
2018-05-03 09:00:00,153.0,-48.04,135.2,-47.91,101.5,-47.6,103.9,-47.81
2018-05-03 10:00:00,101.0,-47.83,86.5,-47.74,66.0,-47.54,64.4,-47.72
2018-05-03 11:00:00,55.6,-47.64,48.4,-47.6,39.6,-47.48,33.6,-47.64
2018-05-03 12:00:00,34.7,-47.56,35.2,-47.56,27.4,-47.48,23.4,-47.66
2018-05-03 13:00:00,34.4,-47.58,38.7,-47.6,29.7,-47.52,27.2,-47.76
2018-05-03 14:00:00,35.9,-47.59,40.0,-47.61,32.7,-47.54,30.6,-47.8
2018-05-03 15:00:00,38.0,-47.6,40.4,-47.61,36.3,-47.55,29.4,-47.79
2018-05-03 16:00:00,35.7,-47.59,37.1,-47.59,33.9,-47.54,28.0,-47.76
2018-05-03 17:00:00,37.1,-47.59,37.1,-47.59,34.2,-47.54,28.2,-47.75
2018-05-03 18:00:00,41.1,-47.61,40.0,-47.6,37.4,-47.54,29.8,-47.76
2018-05-03 19:00:00,55.5,-47.67,47.4,-47.62,45.6,-47.55,34.3,-47.76
2018-05-03 20:00:00,104.4,-47.86,64.8,-47.65,64.3,-47.53,46.3,-47.71
2018-05-03 21:00:00,122.0,-47.94,82.7,-47.73,72.9,-47.56,53.2,-47.72
2018-05-03 22:00:00,153.2,-48.06,104.8,-47.8,87.8,-47.56,63.1,-47.73
2018-05-03 23:00:00,185.0,-48.18,126.1,-47.87,104.4,-47.58,78.1,-47.74
2018-05-04 00:00:00,229.5,-48.33,150.1,-47.91,132.5,-47.6,97.3,-47.71
2018-05-04 01:00:00,261.3,-48.42,166.0,-47.91,163.2,-47.62,119.6,-47.7
2018-05-04 02:00:00,262.5,-48.41,168.6,-47.9,168.5,-47.62,129.6,-47.7
2018-05-04 03:00:00,264.1,-48.38,201.7,-47.99,182.2,-47.58,153.4,-47.73
2018-05-04 04:00:00,252.7,-48.34,213.8,-48.05,184.3,-47.62,183.3,-47.88
2018-05-04 05:00:00,240.5,-48.3,202.8,-48.04,177.3,-47.65,182.8,-47.92
2018-05-04 06:00:00,236.1,-48.3,184.1,-47.97,163.0,-47.64,158.1,-47.84
2018-05-04 07:00:00,201.7,-48.18,157.0,-47.9,138.4,-47.6,140.4,-47.84
2018-05-04 08:00:00,127.6,-47.93,101.8,-47.76,90.6,-47.56,86.3,-47.83
2018-05-04 09:00:00,82.6,-47.77,67.3,-47.68,61.7,-47.55,51.5,-47.83
2018-05-04 10:00:00,66.1,-47.71,55.2,-47.64,51.9,-47.55,37.5,-47.8
2018-05-04 11:00:00,57.2,-47.68,48.1,-47.62,44.8,-47.54,31.1,-47.78
2018-05-04 12:00:00,50.0,-47.64,43.4,-47.6,39.9,-47.52,28.6,-47.73
2018-05-04 13:00:00,48.8,-47.63,42.5,-47.58,39.7,-47.52,28.7,-47.7
2018-05-04 14:00:00,48.6,-47.62,43.0,-47.58,40.3,-47.52,33.0,-47.71
2018-05-04 15:00:00,52.9,-47.64,46.7,-47.6,40.9,-47.53,37.6,-47.72
2018-05-04 16:00:00,61.8,-47.68,52.2,-47.63,39.2,-47.54,39.5,-47.73
2018-05-04 17:00:00,73.4,-47.73,63.0,-47.68,37.3,-47.54,42.0,-47.73
2018-05-04 18:00:00,99.7,-47.84,124.1,-47.95,46.5,-47.56,50.5,-47.77
2018-05-04 19:00:00,115.1,-47.92,182.1,-48.21,58.3,-47.61,50.7,-47.79
2018-05-04 20:00:00,137.9,-48.01,210.1,-48.31,68.6,-47.64,60.1,-47.79
2018-05-04 21:00:00,182.5,-48.18,257.7,-48.46,82.8,-47.66,70.6,-47.74
2018-05-04 22:00:00,236.7,-48.37,294.3,-48.55,100.3,-47.69,87.4,-47.69
2018-05-04 23:00:00,292.2,-48.56,279.0,-48.43,119.1,-47.73,101.8,-47.59
2018-05-05 00:00:00,389.3,-48.87,445.0,-48.94,150.0,-47.78,127.6,-47.51
2018-05-05 01:00:00,490.2,-49.16,825.6,-49.99,181.4,-47.83,159.4,-47.45
2018-05-05 02:00:00,681.4,-49.65,1639.1,-51.54,238.2,-47.93,238.5,-47.57
2018-05-05 03:00:00,754.5,-49.82,1534.4,-51.36,256.6,-47.96,346.6,-47.94
2018-05-05 04:00:00,750.5,-49.81,1497.6,-51.31,251.5,-47.96,365.4,-48.08
2018-05-05 05:00:00,735.8,-49.78,1446.2,-51.22,243.9,-47.94,340.4,-48.01
2018-05-05 06:00:00,583.6,-49.4,1020.9,-50.47,190.5,-47.86,261.3,-47.82
2018-05-05 07:00:00,398.8,-48.87,646.2,-49.64,131.8,-47.77,168.3,-47.79
2018-05-05 08:00:00,285.5,-48.49,418.5,-48.96,106.9,-47.74,140.0,-47.92
2018-05-05 09:00:00,169.5,-48.07,245.9,-48.36,79.8,-47.7,104.2,-47.93
2018-05-05 10:00:00,124.8,-47.93,176.2,-48.11,68.3,-47.69,84.5,-47.93
2018-05-05 11:00:00,105.5,-47.88,149.2,-48.05,62.5,-47.68,71.7,-47.94
2018-05-05 12:00:00,92.3,-47.83,121.1,-47.96,57.7,-47.68,60.6,-47.94
2018-05-05 13:00:00,83.6,-47.81,109.1,-47.93,55.0,-47.69,56.4,-47.93
2018-05-05 14:00:00,81.6,-47.82,104.6,-47.92,55.4,-47.69,55.8,-47.93
2018-05-05 15:00:00,84.9,-47.83,111.5,-47.95,57.5,-47.69,59.1,-47.93
2018-05-05 16:00:00,91.2,-47.85,123.3,-47.98,60.1,-47.69,61.3,-47.91
2018-05-05 17:00:00,101.0,-47.87,143.5,-48.04,62.5,-47.69,71.6,-47.92
2018-05-05 18:00:00,122.0,-47.93,192.2,-48.17,68.7,-47.71,88.1,-47.9
2018-05-05 19:00:00,157.5,-48.04,269.6,-48.4,79.4,-47.73,110.6,-47.91
2018-05-05 20:00:00,177.5,-48.09,329.6,-48.62,82.8,-47.72,128.9,-47.95
2018-05-05 21:00:00,228.0,-48.27,430.3,-48.98,98.7,-47.76,152.3,-48.01
2018-05-05 22:00:00,294.3,-48.5,547.9,-49.35,119.9,-47.81,155.8,-47.9
2018-05-05 23:00:00,327.0,-48.61,578.7,-49.45,129.5,-47.84,142.0,-47.8
2018-05-06 00:00:00,365.2,-48.74,673.8,-49.74,143.7,-47.88,150.4,-47.86
2018-05-06 01:00:00,433.3,-48.98,721.0,-49.84,166.0,-47.94,169.3,-47.81
2018-05-06 02:00:00,476.7,-49.1,602.7,-49.49,170.1,-47.95,190.4,-47.77
2018-05-06 03:00:00,508.9,-49.2,528.2,-49.24,170.2,-47.95,198.7,-47.78
2018-05-06 04:00:00,496.5,-49.17,537.1,-49.29,168.5,-47.95,196.3,-47.82
2018-05-06 05:00:00,460.0,-49.08,522.3,-49.27,158.2,-47.94,191.6,-47.9
2018-05-06 06:00:00,341.8,-48.72,356.9,-48.78,129.5,-47.89,149.3,-47.96
2018-05-06 07:00:00,273.9,-48.49,328.8,-48.72,113.6,-47.86,130.5,-47.97
2018-05-06 08:00:00,272.6,-48.48,329.5,-48.73,115.5,-47.87,122.9,-47.97
2018-05-06 09:00:00,233.1,-48.33,273.4,-48.51,106.6,-47.83,110.8,-47.94
2018-05-06 10:00:00,165.5,-48.08,202.6,-48.25,90.0,-47.76,91.3,-47.91
2018-05-06 11:00:00,108.8,-47.84,139.8,-48.0,69.7,-47.65,80.0,-47.9
2018-05-06 12:00:00,97.2,-47.79,139.5,-47.98,63.5,-47.61,69.9,-47.81
2018-05-06 13:00:00,101.0,-47.79,138.6,-47.97,64.3,-47.6,64.0,-47.77
2018-05-06 14:00:00,109.4,-47.83,147.0,-48.0,68.6,-47.61,64.2,-47.75
2018-05-06 15:00:00,112.6,-47.84,149.5,-48.01,70.5,-47.61,64.2,-47.76
2018-05-06 16:00:00,123.6,-47.88,165.7,-48.06,76.1,-47.62,70.0,-47.75
2018-05-06 17:00:00,150.5,-47.97,217.0,-48.25,87.9,-47.66,89.4,-47.81
2018-05-06 18:00:00,188.2,-48.09,264.7,-48.39,107.2,-47.72,133.0,-47.97
2018-05-06 19:00:00,223.6,-48.21,363.2,-48.71,126.3,-47.76,154.8,-48.0
2018-05-06 20:00:00,274.1,-48.39,469.9,-49.05,144.7,-47.79,176.4,-48.02
2018-05-06 21:00:00,298.4,-48.47,533.2,-49.23,149.9,-47.78,202.1,-48.07
2018-05-06 22:00:00,349.2,-48.65,628.4,-49.5,162.9,-47.8,211.4,-48.02
2018-05-06 23:00:00,408.5,-48.83,754.5,-49.82,181.4,-47.83,216.7,-47.92
2018-05-07 00:00:00,453.9,-48.97,869.9,-50.09,194.7,-47.85,229.1,-47.88
2018-05-07 01:00:00,515.3,-49.15,987.8,-50.34,213.3,-47.88,241.8,-47.83
2018-05-07 02:00:00,598.1,-49.37,1153.1,-50.65,238.4,-47.92,269.7,-47.73
2018-05-07 03:00:00,638.7,-49.48,1194.6,-50.7,250.4,-47.94,279.5,-47.66
2018-05-07 04:00:00,720.3,-49.67,1520.2,-51.28,272.6,-47.97,310.5,-47.66
2018-05-07 05:00:00,713.3,-49.65,1405.0,-51.1,258.0,-47.95,339.3,-47.72
2018-05-07 06:00:00,600.4,-49.36,994.9,-50.37,213.3,-47.86,317.5,-47.93
2018-05-07 07:00:00,493.4,-49.08,816.7,-49.98,179.2,-47.8,270.0,-47.93
2018-05-07 08:00:00,335.4,-48.61,550.4,-49.33,132.4,-47.71,183.9,-47.85
2018-05-07 09:00:00,245.4,-48.31,384.2,-48.82,108.5,-47.67,140.0,-47.82
2018-05-07 10:00:00,202.5,-48.16,269.7,-48.44,97.1,-47.65,127.4,-47.87
2018-05-07 11:00:00,158.6,-48.0,216.7,-48.23,85.7,-47.62,110.8,-47.84
2018-05-07 12:00:00,133.7,-47.88,177.4,-48.07,82.3,-47.59,95.1,-47.8
2018-05-07 13:00:00,118.8,-47.8,150.5,-47.94,81.1,-47.58,88.2,-47.76
2018-05-07 14:00:00,110.8,-47.77,139.0,-47.89,78.9,-47.57,84.2,-47.75
2018-05-07 15:00:00,106.2,-47.74,126.0,-47.85,74.7,-47.57,73.6,-47.71
2018-05-07 16:00:00,107.0,-47.75,135.5,-47.89,73.3,-47.57,73.9,-47.71
2018-05-07 17:00:00,109.8,-47.78,149.1,-47.95,71.1,-47.56,73.1,-47.7
2018-05-07 18:00:00,128.5,-47.87,193.5,-48.15,75.7,-47.58,82.1,-47.75
2018-05-07 19:00:00,198.1,-48.13,337.6,-48.65,108.5,-47.65,116.8,-47.82
2018-05-07 20:00:00,283.6,-48.39,491.0,-49.11,155.5,-47.75,168.4,-47.95
2018-05-07 21:00:00,320.0,-48.49,534.9,-49.21,172.0,-47.77,188.6,-47.98
2018-05-07 22:00:00,384.9,-48.7,703.7,-49.66,189.7,-47.79,220.4,-47.97
2018-05-07 23:00:00,467.8,-48.95,910.6,-50.15,217.6,-47.84,246.8,-47.96
2018-05-08 00:00:00,554.3,-49.2,1057.0,-50.45,241.5,-47.88,254.8,-47.86
2018-05-08 01:00:00,651.4,-49.46,1052.2,-50.4,272.5,-47.93,266.1,-47.72
2018-05-08 02:00:00,712.9,-49.62,1049.8,-50.37,295.0,-47.97,273.5,-47.64
2018-05-08 03:00:00,729.8,-49.67,1407.0,-51.08,298.5,-47.98,274.4,-47.65
2018-05-08 04:00:00,760.4,-49.74,1501.2,-51.23,307.3,-47.99,280.6,-47.66
2018-05-08 05:00:00,753.5,-49.73,1381.3,-51.05,304.0,-47.99,272.4,-47.67
2018-05-08 06:00:00,651.8,-49.5,1097.5,-50.55,268.8,-47.93,241.3,-47.69
2018-05-08 07:00:00,594.8,-49.36,949.3,-50.24,249.3,-47.89,234.2,-47.69
2018-05-08 08:00:00,509.2,-49.12,582.6,-49.28,226.1,-47.81,208.7,-47.64
2018-05-08 09:00:00,274.9,-48.38,209.3,-48.08,157.8,-47.6,133.5,-47.72
2018-05-08 10:00:00,124.4,-47.84,115.4,-47.79,102.3,-47.57,87.4,-47.74
2018-05-08 11:00:00,98.4,-47.73,85.4,-47.68,91.8,-47.61,75.4,-47.71
2018-05-08 12:00:00,91.5,-47.71,78.6,-47.66,81.8,-47.59,69.2,-47.7
2018-05-08 13:00:00,91.5,-47.73,79.2,-47.67,81.2,-47.6,71.9,-47.73
2018-05-08 14:00:00,95.8,-47.75,85.0,-47.71,86.3,-47.64,76.6,-47.79
2018-05-08 15:00:00,87.8,-47.75,78.9,-47.72,85.4,-47.67,73.7,-47.84
2018-05-08 16:00:00,62.1,-47.68,57.4,-47.66,59.0,-47.62,54.3,-47.83
2018-05-08 17:00:00,48.7,-47.63,46.4,-47.61,40.9,-47.55,36.9,-47.79
2018-05-08 18:00:00,46.4,-47.62,46.7,-47.62,36.4,-47.53,32.1,-47.78
2018-05-08 19:00:00,50.4,-47.65,50.4,-47.64,37.8,-47.54,31.3,-47.81
2018-05-08 20:00:00,59.5,-47.7,49.7,-47.64,41.5,-47.56,32.2,-47.84
2018-05-08 21:00:00,69.1,-47.73,55.9,-47.65,46.3,-47.56,38.5,-47.84
2018-05-08 22:00:00,82.8,-47.8,65.3,-47.7,54.8,-47.59,47.8,-47.89
2018-05-08 23:00:00,93.0,-47.85,68.8,-47.71,56.7,-47.6,53.7,-47.89
2018-05-09 00:00:00,106.5,-47.9,72.6,-47.72,61.3,-47.62,59.2,-47.85
2018-05-09 01:00:00,127.8,-47.98,82.1,-47.75,69.1,-47.64,69.9,-47.83
2018-05-09 02:00:00,156.5,-48.09,111.8,-47.86,80.0,-47.66,82.9,-47.83
2018-05-09 03:00:00,178.6,-48.17,143.3,-47.98,87.9,-47.68,95.7,-47.89
2018-05-09 04:00:00,192.8,-48.22,158.7,-48.03,95.7,-47.68,108.5,-47.91
2018-05-09 05:00:00,208.6,-48.28,176.3,-48.09,109.2,-47.68,126.7,-47.95
2018-05-09 06:00:00,222.3,-48.33,182.1,-48.09,117.2,-47.69,137.9,-47.95
2018-05-09 07:00:00,199.3,-48.24,170.8,-48.06,110.6,-47.68,127.9,-47.93
2018-05-09 08:00:00,144.8,-48.04,132.8,-47.95,91.1,-47.63,94.8,-47.94
2018-05-09 09:00:00,89.9,-47.82,92.2,-47.82,65.1,-47.6,65.3,-47.92
2018-05-09 10:00:00,76.2,-47.77,83.6,-47.8,62.4,-47.62,55.3,-47.9
2018-05-09 11:00:00,69.0,-47.76,75.2,-47.78,59.9,-47.64,53.4,-47.95
2018-05-09 12:00:00,61.0,-47.73,63.2,-47.74,57.2,-47.65,46.3,-47.95
2018-05-09 13:00:00,50.1,-47.68,49.8,-47.68,50.2,-47.63,36.2,-47.9
2018-05-09 14:00:00,44.3,-47.65,41.8,-47.64,41.2,-47.6,29.8,-47.88
2018-05-09 15:00:00,45.5,-47.66,40.7,-47.64,38.5,-47.59,30.8,-47.9
2018-05-09 16:00:00,46.8,-47.66,43.6,-47.65,39.5,-47.59,32.2,-47.9
2018-05-09 17:00:00,46.8,-47.65,46.5,-47.66,44.3,-47.61,33.7,-47.87
2018-05-09 18:00:00,44.4,-47.63,39.0,-47.6,43.7,-47.58,28.2,-47.77
2018-05-09 19:00:00,39.5,-47.59,36.6,-47.57,38.8,-47.55,29.0,-47.71
2018-05-09 20:00:00,40.0,-47.58,35.3,-47.55,36.1,-47.52,33.4,-47.69
2018-05-09 21:00:00,44.4,-47.6,40.3,-47.57,38.2,-47.52,45.0,-47.74
2018-05-09 22:00:00,50.4,-47.62,46.2,-47.58,44.3,-47.52,41.2,-47.69
2018-05-09 23:00:00,44.9,-47.58,38.7,-47.54,38.4,-47.49,40.1,-47.62
2018-05-10 00:00:00,45.2,-47.58,34.3,-47.51,36.0,-47.46,23.5,-47.53
2018-05-10 01:00:00,51.4,-47.61,37.2,-47.52,41.8,-47.47,23.6,-47.55
2018-05-10 02:00:00,62.8,-47.66,48.5,-47.56,52.0,-47.5,28.7,-47.59
2018-05-10 03:00:00,61.3,-47.67,57.1,-47.64,54.5,-47.57,49.1,-47.75
2018-05-10 04:00:00,78.5,-47.8,72.4,-47.77,65.9,-47.68,68.9,-47.98
2018-05-10 05:00:00,76.9,-47.79,65.7,-47.74,47.6,-47.6,48.5,-47.81
2018-05-10 06:00:00,72.9,-47.76,64.3,-47.73,41.7,-47.57,40.8,-47.73
2018-05-10 07:00:00,59.6,-47.71,54.5,-47.7,37.3,-47.57,38.6,-47.74
2018-05-10 08:00:00,45.4,-47.63,44.1,-47.64,28.0,-47.52,31.4,-47.66
2018-05-10 09:00:00,33.8,-47.57,32.9,-47.58,21.1,-47.48,26.3,-47.61
2018-05-10 10:00:00,26.5,-47.52,28.0,-47.55,16.5,-47.46,23.1,-47.59
2018-05-10 11:00:00,24.0,-47.51,25.6,-47.54,15.1,-47.45,22.1,-47.58
2018-05-10 12:00:00,24.2,-47.51,27.0,-47.55,15.7,-47.45,23.9,-47.61
2018-05-10 13:00:00,23.3,-47.5,26.4,-47.54,14.6,-47.44,23.2,-47.6
2018-05-10 14:00:00,22.6,-47.5,23.7,-47.52,13.7,-47.44,20.7,-47.58
2018-05-10 15:00:00,23.9,-47.51,24.6,-47.53,14.8,-47.45,21.5,-47.58
2018-05-10 16:00:00,25.2,-47.51,24.7,-47.52,15.5,-47.45,21.9,-47.59
2018-05-10 17:00:00,30.8,-47.54,28.9,-47.54,19.2,-47.45,26.4,-47.59
2018-05-10 18:00:00,36.6,-47.56,34.6,-47.56,23.0,-47.46,30.0,-47.6
2018-05-10 19:00:00,46.6,-47.59,39.8,-47.56,29.5,-47.46,35.6,-47.59
2018-05-10 20:00:00,78.7,-47.71,62.0,-47.62,45.4,-47.47,42.3,-47.55
2018-05-10 21:00:00,174.3,-48.07,119.9,-47.74,84.7,-47.49,71.8,-47.39
2018-05-10 22:00:00,215.2,-48.14,165.4,-47.8,152.4,-47.43,105.9,-47.39
2018-05-10 23:00:00,210.4,-48.14,160.1,-47.81,152.4,-47.48,121.3,-47.49
2018-05-11 00:00:00,202.9,-48.13,144.5,-47.77,145.1,-47.5,99.6,-47.46
2018-05-11 01:00:00,202.6,-48.17,123.4,-47.72,128.2,-47.51,84.6,-47.48
2018-05-11 02:00:00,286.9,-48.5,142.1,-47.76,134.7,-47.56,100.6,-47.4
2018-05-11 03:00:00,461.9,-49.06,331.4,-48.47,180.1,-47.72,150.7,-47.41
2018-05-11 04:00:00,349.9,-48.74,234.2,-48.22,143.8,-47.74,127.2,-47.51
2018-05-11 05:00:00,189.1,-48.19,85.9,-47.7,90.2,-47.64,74.7,-47.57
2018-05-11 06:00:00,106.9,-47.86,42.6,-47.56,55.8,-47.56,43.7,-47.58
2018-05-11 07:00:00,69.1,-47.7,34.4,-47.54,34.0,-47.51,25.1,-47.55
2018-05-11 08:00:00,44.3,-47.6,25.9,-47.51,23.2,-47.48,15.9,-47.56
2018-05-11 09:00:00,29.2,-47.54,16.9,-47.48,17.1,-47.47,10.8,-47.56
2018-05-11 10:00:00,26.0,-47.52,15.9,-47.47,16.4,-47.46,12.3,-47.56
2018-05-11 11:00:00,26.7,-47.52,19.9,-47.49,17.8,-47.46,16.8,-47.56
2018-05-11 12:00:00,28.3,-47.53,21.7,-47.5,19.0,-47.47,18.3,-47.58
2018-05-11 13:00:00,28.0,-47.53,22.7,-47.5,18.3,-47.47,16.5,-47.57
2018-05-11 14:00:00,32.4,-47.55,27.2,-47.52,21.4,-47.47,20.3,-47.59
2018-05-11 15:00:00,46.8,-47.61,42.2,-47.58,32.2,-47.5,34.0,-47.65
2018-05-11 16:00:00,63.3,-47.68,70.9,-47.71,39.1,-47.52,40.1,-47.66
2018-05-11 17:00:00,91.2,-47.79,146.2,-48.03,48.9,-47.53,57.1,-47.7
2018-05-11 18:00:00,116.8,-47.89,197.0,-48.24,61.4,-47.56,71.1,-47.75
2018-05-11 19:00:00,151.6,-48.03,245.5,-48.42,76.0,-47.59,80.4,-47.76
2018-05-11 20:00:00,163.0,-48.08,265.8,-48.49,80.1,-47.61,86.2,-47.77
2018-05-11 21:00:00,169.7,-48.1,190.2,-48.17,82.9,-47.62,83.9,-47.72
2018-05-11 22:00:00,145.0,-48.01,71.4,-47.66,75.9,-47.62,73.7,-47.68
2018-05-11 23:00:00,141.9,-48.01,65.2,-47.64,73.0,-47.63,65.2,-47.66
2018-05-12 00:00:00,136.3,-47.99,73.7,-47.67,71.1,-47.61,62.1,-47.64
2018-05-12 01:00:00,133.2,-47.98,86.6,-47.73,69.6,-47.57,60.7,-47.66
2018-05-12 02:00:00,141.3,-48.02,87.6,-47.73,67.3,-47.58,57.8,-47.64
2018-05-12 03:00:00,133.8,-47.98,89.8,-47.73,64.9,-47.55,56.8,-47.62
2018-05-12 04:00:00,109.0,-47.88,99.0,-47.79,56.9,-47.51,50.3,-47.67
2018-05-12 05:00:00,122.5,-47.93,108.8,-47.81,60.7,-47.5,52.7,-47.64
2018-05-12 06:00:00,103.2,-47.85,90.3,-47.75,51.7,-47.5,42.6,-47.62
2018-05-12 07:00:00,97.0,-47.83,76.4,-47.7,48.9,-47.51,40.1,-47.63
2018-05-12 08:00:00,60.6,-47.68,57.0,-47.65,35.8,-47.5,30.8,-47.65
2018-05-12 09:00:00,45.6,-47.61,39.3,-47.57,26.1,-47.48,23.3,-47.61
2018-05-12 10:00:00,61.2,-47.68,44.4,-47.58,31.4,-47.49,27.8,-47.6
2018-05-12 11:00:00,75.7,-47.74,61.0,-47.65,37.0,-47.51,34.6,-47.62
2018-05-12 12:00:00,72.9,-47.73,55.0,-47.63,36.2,-47.52,33.9,-47.62
2018-05-12 13:00:00,48.3,-47.61,33.0,-47.53,24.3,-47.47,23.3,-47.55
2018-05-12 14:00:00,56.7,-47.64,31.5,-47.49,25.1,-47.46,24.4,-47.49
2018-05-12 15:00:00,66.6,-47.67,34.7,-47.48,28.6,-47.45,27.2,-47.44
2018-05-12 16:00:00,69.4,-47.68,36.7,-47.47,31.0,-47.42,28.6,-47.43
2018-05-12 17:00:00,106.9,-47.83,58.2,-47.54,49.9,-47.41,42.8,-47.48
2018-05-12 18:00:00,129.6,-47.91,96.1,-47.68,70.2,-47.41,59.0,-47.5
2018-05-12 19:00:00,100.8,-47.79,115.5,-47.8,83.7,-47.54,90.1,-47.71
2018-05-12 20:00:00,110.6,-47.84,97.2,-47.73,71.7,-47.53,99.9,-47.7
2018-05-12 21:00:00,120.0,-47.89,87.0,-47.7,56.6,-47.54,74.3,-47.59
2018-05-12 22:00:00,118.3,-47.9,107.6,-47.83,48.2,-47.52,66.1,-47.6
2018-05-12 23:00:00,102.9,-47.82,90.8,-47.74,46.4,-47.46,61.8,-47.58
2018-05-13 00:00:00,104.8,-47.83,119.5,-47.87,60.7,-47.5,97.2,-47.77
2018-05-13 01:00:00,127.5,-47.92,146.0,-47.97,102.1,-47.63,141.4,-47.91
2018-05-13 02:00:00,120.8,-47.88,119.3,-47.82,106.9,-47.63,121.8,-47.81
2018-05-13 03:00:00,121.9,-47.89,110.0,-47.78,111.2,-47.65,88.4,-47.7
2018-05-13 04:00:00,117.8,-47.9,108.1,-47.82,108.2,-47.69,75.9,-47.72
2018-05-13 05:00:00,128.9,-47.97,128.4,-47.94,128.6,-47.81,113.7,-47.93
2018-05-13 06:00:00,132.2,-48.0,130.4,-47.95,128.9,-47.83,148.8,-48.09
2018-05-13 07:00:00,133.0,-48.0,137.1,-47.98,121.8,-47.79,152.8,-48.12
2018-05-13 08:00:00,126.8,-47.97,129.6,-47.95,111.3,-47.75,137.7,-48.08
2018-05-13 09:00:00,90.4,-47.82,95.7,-47.82,71.1,-47.64,94.4,-47.93
2018-05-13 10:00:00,75.7,-47.76,82.4,-47.77,56.2,-47.61,70.6,-47.85
2018-05-13 11:00:00,72.1,-47.74,77.2,-47.75,52.5,-47.6,66.8,-47.84
2018-05-13 12:00:00,70.6,-47.74,70.8,-47.73,48.2,-47.58,57.9,-47.8
2018-05-13 13:00:00,77.0,-47.75,75.2,-47.73,42.2,-47.57,52.3,-47.73
2018-05-13 14:00:00,78.4,-47.76,85.3,-47.77,41.0,-47.57,51.2,-47.73
2018-05-13 15:00:00,78.7,-47.76,85.7,-47.77,43.2,-47.59,51.5,-47.75
2018-05-13 16:00:00,77.4,-47.75,75.3,-47.73,44.6,-47.59,51.1,-47.74
2018-05-13 17:00:00,78.3,-47.76,77.8,-47.74,45.7,-47.59,50.4,-47.74
2018-05-13 18:00:00,77.7,-47.76,70.7,-47.71,45.6,-47.59,51.6,-47.73
2018-05-13 19:00:00,100.2,-47.85,76.2,-47.71,53.1,-47.6,57.1,-47.69
2018-05-13 20:00:00,180.8,-48.15,96.8,-47.71,79.4,-47.64,83.0,-47.55
2018-05-13 21:00:00,289.8,-48.49,136.5,-47.73,120.2,-47.66,132.7,-47.34
2018-05-13 22:00:00,287.8,-48.45,153.5,-47.79,126.2,-47.61,152.7,-47.38
2018-05-13 23:00:00,290.2,-48.47,169.6,-47.88,126.4,-47.63,154.9,-47.44
2018-05-14 00:00:00,280.6,-48.46,185.3,-48.0,123.1,-47.65,146.9,-47.53
2018-05-14 01:00:00,229.4,-48.3,150.4,-47.94,102.9,-47.68,113.3,-47.62
2018-05-14 02:00:00,210.8,-48.22,133.6,-47.86,91.3,-47.68,92.3,-47.67
2018-05-14 03:00:00,215.1,-48.2,128.5,-47.8,84.8,-47.67,87.5,-47.69
2018-05-14 04:00:00,196.1,-48.14,119.7,-47.75,75.7,-47.65,81.3,-47.69
2018-05-14 05:00:00,163.5,-48.03,127.7,-47.81,75.0,-47.66,85.1,-47.74
2018-05-14 06:00:00,154.4,-48.01,135.6,-47.86,77.9,-47.7,92.8,-47.84
2018-05-14 07:00:00,147.6,-47.99,129.9,-47.86,73.8,-47.7,91.1,-47.9
2018-05-14 08:00:00,105.7,-47.84,100.2,-47.77,53.5,-47.63,68.2,-47.84
2018-05-14 09:00:00,80.7,-47.74,82.6,-47.74,43.3,-47.6,56.8,-47.81
2018-05-14 10:00:00,65.5,-47.68,67.7,-47.71,36.0,-47.57,48.9,-47.77
2018-05-14 11:00:00,56.4,-47.65,56.0,-47.68,31.5,-47.56,42.6,-47.74
2018-05-14 12:00:00,55.3,-47.65,54.6,-47.69,32.3,-47.56,42.8,-47.76
2018-05-14 13:00:00,52.9,-47.67,50.6,-47.68,32.7,-47.57,39.8,-47.76
2018-05-14 14:00:00,50.8,-47.66,42.8,-47.63,30.4,-47.55,33.7,-47.73
2018-05-14 15:00:00,49.5,-47.64,39.7,-47.61,29.3,-47.54,29.2,-47.69
2018-05-14 16:00:00,52.1,-47.65,39.7,-47.61,31.1,-47.55,29.3,-47.7
2018-05-14 17:00:00,56.2,-47.68,40.6,-47.61,30.9,-47.55,29.4,-47.69
2018-05-14 18:00:00,70.5,-47.74,47.4,-47.63,35.0,-47.56,35.8,-47.7
2018-05-14 19:00:00,94.1,-47.84,57.0,-47.67,42.5,-47.59,44.5,-47.72
2018-05-14 20:00:00,110.6,-47.9,63.5,-47.68,47.5,-47.6,49.5,-47.73
2018-05-14 21:00:00,128.6,-47.97,72.3,-47.71,52.3,-47.6,53.2,-47.71
2018-05-14 22:00:00,138.7,-48.01,78.2,-47.72,54.9,-47.6,52.8,-47.68
2018-05-14 23:00:00,145.9,-48.03,84.1,-47.74,57.7,-47.61,55.1,-47.69
2018-05-15 00:00:00,166.4,-48.11,87.1,-47.74,63.5,-47.62,62.3,-47.68
2018-05-15 01:00:00,160.5,-48.08,87.4,-47.75,66.3,-47.62,70.2,-47.69
2018-05-15 02:00:00,153.2,-48.04,97.6,-47.79,67.4,-47.61,72.7,-47.67
2018-05-15 03:00:00,174.6,-48.12,99.4,-47.77,75.4,-47.63,78.5,-47.67
2018-05-15 04:00:00,183.0,-48.16,101.2,-47.79,75.6,-47.63,78.7,-47.68
2018-05-15 05:00:00,163.7,-48.09,104.2,-47.82,70.6,-47.63,78.1,-47.74
2018-05-15 06:00:00,140.3,-47.98,96.7,-47.8,65.3,-47.61,71.8,-47.77
2018-05-15 07:00:00,127.0,-47.92,92.0,-47.78,61.8,-47.6,67.2,-47.75
2018-05-15 08:00:00,117.3,-47.86,87.2,-47.76,59.0,-47.59,65.2,-47.75
2018-05-15 09:00:00,104.5,-47.82,77.1,-47.73,55.4,-47.6,60.0,-47.74
2018-05-15 10:00:00,97.3,-47.79,72.8,-47.72,53.3,-47.6,56.8,-47.76
2018-05-15 11:00:00,89.0,-47.76,67.4,-47.68,50.8,-47.59,52.7,-47.74
2018-05-15 12:00:00,80.0,-47.73,58.9,-47.64,47.5,-47.59,47.4,-47.74
2018-05-15 13:00:00,68.5,-47.68,51.1,-47.61,41.9,-47.56,39.4,-47.71
2018-05-15 14:00:00,60.4,-47.63,45.0,-47.57,37.6,-47.54,34.1,-47.66
2018-05-15 15:00:00,60.0,-47.63,46.6,-47.56,37.7,-47.54,35.4,-47.65
2018-05-15 16:00:00,63.0,-47.63,47.6,-47.56,39.6,-47.53,36.5,-47.62
2018-05-15 17:00:00,68.4,-47.65,53.3,-47.57,41.2,-47.53,40.3,-47.62
2018-05-15 18:00:00,79.7,-47.69,60.0,-47.6,45.0,-47.54,45.3,-47.6
2018-05-15 19:00:00,99.3,-47.76,74.0,-47.65,50.4,-47.55,53.4,-47.6
2018-05-15 20:00:00,119.1,-47.84,92.9,-47.73,55.8,-47.57,59.2,-47.61
2018-05-15 21:00:00,140.5,-47.92,121.5,-47.83,60.3,-47.58,67.5,-47.59
2018-05-15 22:00:00,158.5,-48.0,138.2,-47.9,63.0,-47.58,72.7,-47.58
2018-05-15 23:00:00,176.6,-48.07,116.2,-47.78,68.0,-47.59,76.9,-47.57
2018-05-16 00:00:00,184.6,-48.1,96.1,-47.71,70.8,-47.61,70.9,-47.61
2018-05-16 01:00:00,177.4,-48.08,90.2,-47.69,73.1,-47.62,71.0,-47.61
2018-05-16 02:00:00,184.3,-48.12,101.0,-47.75,75.3,-47.61,71.0,-47.62
2018-05-16 03:00:00,168.1,-48.06,91.7,-47.72,69.2,-47.59,67.3,-47.61
2018-05-16 04:00:00,141.1,-47.97,78.4,-47.7,60.3,-47.58,58.0,-47.64
2018-05-16 05:00:00,118.6,-47.9,76.3,-47.71,53.0,-47.58,54.7,-47.67
2018-05-16 06:00:00,110.0,-47.88,75.5,-47.72,51.1,-47.6,52.6,-47.74
2018-05-16 07:00:00,96.3,-47.85,75.0,-47.75,48.0,-47.62,51.2,-47.8
2018-05-16 08:00:00,85.4,-47.82,72.4,-47.77,44.9,-47.63,49.1,-47.86
2018-05-16 09:00:00,73.2,-47.76,60.7,-47.71,42.0,-47.6,44.2,-47.8
2018-05-16 10:00:00,67.4,-47.7,58.0,-47.66,40.3,-47.57,44.0,-47.75
2018-05-16 11:00:00,58.4,-47.66,51.9,-47.63,34.3,-47.53,39.6,-47.72
2018-05-16 12:00:00,50.2,-47.62,39.4,-47.57,27.4,-47.51,29.1,-47.67
2018-05-16 13:00:00,41.5,-47.58,31.0,-47.53,21.3,-47.48,21.0,-47.61
2018-05-16 14:00:00,41.4,-47.59,30.8,-47.53,20.6,-47.47,19.6,-47.6
2018-05-16 15:00:00,43.4,-47.59,34.8,-47.56,20.5,-47.47,18.8,-47.6
2018-05-16 16:00:00,42.7,-47.59,40.1,-47.58,19.5,-47.47,20.0,-47.58
2018-05-16 17:00:00,41.0,-47.57,36.7,-47.55,17.4,-47.46,17.9,-47.55
2018-05-16 18:00:00,39.4,-47.56,29.1,-47.51,15.2,-47.44,15.1,-47.51
2018-05-16 19:00:00,39.0,-47.55,30.6,-47.51,14.1,-47.43,15.2,-47.48
2018-05-16 20:00:00,40.0,-47.55,41.0,-47.55,13.8,-47.42,17.9,-47.48
2018-05-16 21:00:00,44.5,-47.56,47.0,-47.57,14.6,-47.42,19.7,-47.47
2018-05-16 22:00:00,48.6,-47.58,47.6,-47.57,15.4,-47.42,20.7,-47.44
2018-05-16 23:00:00,48.5,-47.57,46.7,-47.56,15.1,-47.41,20.8,-47.43
2018-05-17 00:00:00,52.9,-47.59,50.5,-47.57,15.9,-47.41,22.8,-47.43
2018-05-17 01:00:00,56.6,-47.6,57.2,-47.6,16.2,-47.41,24.1,-47.42
2018-05-17 02:00:00,65.5,-47.64,66.1,-47.64,18.9,-47.42,28.6,-47.42
2018-05-17 03:00:00,67.7,-47.65,70.8,-47.66,19.8,-47.42,28.1,-47.41
2018-05-17 04:00:00,69.6,-47.66,75.2,-47.68,20.0,-47.42,29.3,-47.43
2018-05-17 05:00:00,53.9,-47.59,57.1,-47.61,16.0,-47.42,23.2,-47.43
2018-05-17 06:00:00,46.7,-47.56,47.6,-47.57,13.7,-47.41,18.6,-47.42
2018-05-17 07:00:00,40.3,-47.54,40.1,-47.54,12.7,-47.42,16.5,-47.45
2018-05-17 08:00:00,33.6,-47.52,34.8,-47.52,11.4,-47.42,14.5,-47.46
2018-05-17 09:00:00,31.7,-47.51,30.9,-47.51,11.0,-47.42,13.2,-47.47
2018-05-17 10:00:00,30.2,-47.51,29.3,-47.51,11.2,-47.43,12.6,-47.5
2018-05-17 11:00:00,29.6,-47.52,27.4,-47.5,11.7,-47.44,11.4,-47.52
2018-05-17 12:00:00,29.5,-47.52,26.4,-47.5,11.7,-47.44,11.1,-47.52
2018-05-17 13:00:00,29.4,-47.52,26.7,-47.51,12.3,-47.45,11.5,-47.55
2018-05-17 14:00:00,29.1,-47.52,26.2,-47.51,12.4,-47.45,10.7,-47.56
2018-05-17 15:00:00,30.1,-47.53,26.5,-47.51,12.8,-47.45,11.6,-47.56
2018-05-17 16:00:00,30.5,-47.53,25.7,-47.5,12.4,-47.45,12.0,-47.54
2018-05-17 17:00:00,31.4,-47.53,27.1,-47.51,12.9,-47.45,11.8,-47.55
2018-05-17 18:00:00,38.6,-47.56,43.9,-47.59,15.0,-47.45,14.7,-47.54
2018-05-17 19:00:00,66.2,-47.67,109.7,-47.86,24.0,-47.46,36.2,-47.59
2018-05-17 20:00:00,70.7,-47.69,112.3,-47.87,25.9,-47.46,35.7,-47.58
2018-05-17 21:00:00,65.3,-47.68,85.5,-47.77,24.0,-47.48,22.2,-47.56
2018-05-17 22:00:00,66.2,-47.69,85.5,-47.77,24.5,-47.48,20.3,-47.57
2018-05-17 23:00:00,84.7,-47.76,110.0,-47.87,29.8,-47.49,26.0,-47.57
2018-05-18 00:00:00,109.7,-47.86,128.0,-47.93,35.6,-47.51,39.0,-47.57
2018-05-18 01:00:00,124.2,-47.91,141.8,-47.98,38.3,-47.51,47.5,-47.57
2018-05-18 02:00:00,152.1,-48.02,143.2,-47.96,44.9,-47.52,57.6,-47.54
2018-05-18 03:00:00,238.3,-48.32,128.4,-47.81,66.5,-47.56,77.4,-47.44
2018-05-18 04:00:00,297.1,-48.52,141.7,-47.82,82.9,-47.59,89.8,-47.38
2018-05-18 05:00:00,277.0,-48.45,145.6,-47.86,76.9,-47.58,81.3,-47.39
2018-05-18 06:00:00,188.7,-48.15,156.3,-48.0,51.2,-47.53,62.1,-47.5
2018-05-18 07:00:00,97.5,-47.81,101.6,-47.83,28.9,-47.48,38.6,-47.56
2018-05-18 08:00:00,69.8,-47.71,75.1,-47.73,22.5,-47.47,25.5,-47.58
2018-05-18 09:00:00,61.6,-47.68,63.8,-47.69,21.2,-47.47,25.1,-47.6
2018-05-18 10:00:00,55.3,-47.65,57.4,-47.67,20.6,-47.48,21.6,-47.61
2018-05-18 11:00:00,51.7,-47.64,53.4,-47.65,20.0,-47.48,20.4,-47.62
2018-05-18 12:00:00,52.7,-47.65,47.9,-47.63,20.1,-47.48,19.0,-47.62
2018-05-18 13:00:00,52.0,-47.65,42.3,-47.6,19.5,-47.48,19.0,-47.62
2018-05-18 14:00:00,49.8,-47.64,34.8,-47.56,18.9,-47.48,15.7,-47.62
2018-05-18 15:00:00,46.5,-47.62,31.3,-47.55,18.0,-47.47,15.4,-47.6
2018-05-18 16:00:00,46.0,-47.62,29.0,-47.54,18.4,-47.47,15.2,-47.6
2018-05-18 17:00:00,48.3,-47.63,30.8,-47.55,19.1,-47.48,15.5,-47.6
2018-05-18 18:00:00,52.8,-47.65,34.1,-47.56,20.1,-47.48,16.6,-47.6
2018-05-18 19:00:00,67.0,-47.71,74.5,-47.74,24.6,-47.5,25.0,-47.62
2018-05-18 20:00:00,115.1,-47.9,201.1,-48.26,41.3,-47.53,64.6,-47.77
2018-05-18 21:00:00,132.2,-47.96,236.3,-48.38,47.7,-47.54,65.8,-47.75
2018-05-18 22:00:00,154.3,-48.05,280.1,-48.54,58.0,-47.56,62.7,-47.69
2018-05-18 23:00:00,224.3,-48.31,381.7,-48.89,87.1,-47.62,77.9,-47.68
2018-05-19 00:00:00,283.9,-48.52,463.5,-49.14,112.8,-47.67,93.5,-47.69
2018-05-19 01:00:00,298.7,-48.57,359.6,-48.75,119.5,-47.68,102.6,-47.62
2018-05-19 02:00:00,313.9,-48.59,242.3,-48.23,135.1,-47.59,115.2,-47.53
2018-05-19 03:00:00,319.2,-48.61,304.3,-48.47,133.7,-47.6,119.1,-47.53
2018-05-19 04:00:00,335.4,-48.67,459.1,-49.02,132.3,-47.64,120.1,-47.53
2018-05-19 05:00:00,369.6,-48.79,655.5,-49.63,140.2,-47.69,133.6,-47.57
2018-05-19 06:00:00,378.5,-48.81,708.5,-49.8,137.8,-47.71,144.0,-47.62
2018-05-19 07:00:00,328.6,-48.65,532.3,-49.31,112.7,-47.66,144.6,-47.66
2018-05-19 08:00:00,228.7,-48.31,271.0,-48.47,73.1,-47.6,110.5,-47.69
2018-05-19 09:00:00,149.0,-48.01,112.9,-47.87,43.9,-47.54,66.2,-47.69
2018-05-19 10:00:00,111.4,-47.87,89.2,-47.79,33.1,-47.52,43.9,-47.69
2018-05-19 11:00:00,82.5,-47.77,72.8,-47.73,26.9,-47.5,31.1,-47.67
2018-05-19 12:00:00,66.0,-47.7,61.5,-47.68,23.4,-47.5,24.8,-47.64
2018-05-19 13:00:00,54.2,-47.65,51.3,-47.64,20.6,-47.49,21.0,-47.63
2018-05-19 14:00:00,51.5,-47.64,52.3,-47.65,20.7,-47.49,20.0,-47.64
2018-05-19 15:00:00,51.9,-47.64,62.6,-47.7,22.2,-47.5,19.1,-47.63
2018-05-19 16:00:00,56.8,-47.67,79.6,-47.78,26.2,-47.52,24.4,-47.68
2018-05-19 17:00:00,67.4,-47.72,101.3,-47.87,31.7,-47.54,35.6,-47.74
2018-05-19 18:00:00,77.7,-47.77,126.2,-47.98,35.7,-47.54,40.9,-47.79
2018-05-19 19:00:00,91.6,-47.82,160.2,-48.11,38.5,-47.54,39.7,-47.75
2018-05-19 20:00:00,117.6,-47.92,219.3,-48.34,45.7,-47.56,42.2,-47.72
2018-05-19 21:00:00,150.2,-48.04,283.9,-48.58,56.4,-47.58,51.4,-47.7
2018-05-19 22:00:00,193.8,-48.21,354.4,-48.81,72.3,-47.61,66.3,-47.7
2018-05-19 23:00:00,263.5,-48.46,472.5,-49.18,98.2,-47.66,90.6,-47.73
2018-05-20 00:00:00,326.6,-48.67,544.5,-49.39,123.2,-47.71,113.5,-47.76
2018-05-20 01:00:00,372.7,-48.82,576.8,-49.48,144.1,-47.75,127.9,-47.76
2018-05-20 02:00:00,394.7,-48.89,682.0,-49.77,150.7,-47.76,128.9,-47.77
2018-05-20 03:00:00,381.6,-48.86,700.8,-49.82,145.5,-47.76,128.2,-47.8
2018-05-20 04:00:00,353.6,-48.77,619.9,-49.6,136.4,-47.74,121.6,-47.81
2018-05-20 05:00:00,327.4,-48.68,522.5,-49.32,128.6,-47.73,113.1,-47.8
2018-05-20 06:00:00,308.9,-48.62,578.1,-49.5,121.5,-47.72,118.0,-47.87
2018-05-20 07:00:00,264.3,-48.47,464.5,-49.17,103.6,-47.7,137.3,-48.05
2018-05-20 08:00:00,206.5,-48.27,334.0,-48.75,82.6,-47.67,127.1,-48.13
2018-05-20 09:00:00,161.2,-48.1,259.5,-48.48,66.6,-47.64,89.8,-48.03
2018-05-20 10:00:00,122.5,-47.94,197.0,-48.26,53.3,-47.62,63.5,-47.96
2018-05-20 11:00:00,93.1,-47.82,147.4,-48.06,43.8,-47.6,48.4,-47.92
2018-05-20 12:00:00,70.5,-47.73,112.1,-47.92,36.2,-47.58,36.9,-47.88
2018-05-20 13:00:00,65.3,-47.7,100.7,-47.87,33.8,-47.57,33.8,-47.86
2018-05-20 14:00:00,61.5,-47.68,90.6,-47.82,31.9,-47.56,31.1,-47.83
2018-05-20 15:00:00,57.0,-47.65,83.9,-47.78,29.5,-47.55,30.4,-47.8
2018-05-20 16:00:00,59.0,-47.66,85.7,-47.78,31.2,-47.56,30.9,-47.81
2018-05-20 17:00:00,65.7,-47.69,98.6,-47.84,34.9,-47.57,36.8,-47.85
2018-05-20 18:00:00,82.7,-47.75,129.9,-47.95,42.6,-47.6,51.3,-47.9
2018-05-20 19:00:00,107.1,-47.85,173.0,-48.12,52.7,-47.64,69.2,-47.98
2018-05-20 20:00:00,139.5,-47.98,237.3,-48.36,64.8,-47.67,89.9,-48.03
2018-05-20 21:00:00,152.7,-48.04,262.7,-48.45,69.8,-47.69,102.2,-48.08
2018-05-20 22:00:00,153.2,-48.02,262.8,-48.44,72.5,-47.69,108.0,-48.08
2018-05-20 23:00:00,164.4,-48.0,276.1,-48.41,79.7,-47.69,117.4,-48.02
2018-05-21 00:00:00,190.5,-48.05,309.1,-48.5,95.8,-47.73,129.7,-48.01
2018-05-21 01:00:00,216.2,-48.16,336.5,-48.64,111.5,-47.79,124.6,-48.0
2018-05-21 02:00:00,249.4,-48.31,364.3,-48.74,125.4,-47.84,128.0,-47.96
2018-05-21 03:00:00,294.9,-48.49,393.8,-48.83,137.4,-47.87,142.1,-47.94
2018-05-21 04:00:00,308.7,-48.54,379.7,-48.81,134.4,-47.87,153.2,-48.03
2018-05-21 05:00:00,301.4,-48.55,363.9,-48.78,130.0,-47.88,145.5,-48.07
2018-05-21 06:00:00,295.1,-48.55,367.6,-48.84,131.2,-47.91,136.7,-48.1
2018-05-21 07:00:00,265.7,-48.47,305.1,-48.65,124.5,-47.91,128.0,-48.14
2018-05-21 08:00:00,242.5,-48.4,269.7,-48.52,121.7,-47.9,120.6,-48.14
2018-05-21 09:00:00,210.1,-48.28,246.5,-48.44,117.6,-47.88,111.4,-48.12
2018-05-21 10:00:00,153.7,-48.05,212.2,-48.29,97.3,-47.78,94.6,-48.02
2018-05-21 11:00:00,126.0,-47.93,153.6,-48.04,89.0,-47.74,86.8,-47.99
2018-05-21 12:00:00,126.0,-47.94,101.9,-47.84,90.4,-47.77,82.8,-48.03
2018-05-21 13:00:00,116.6,-47.91,91.7,-47.8,84.4,-47.76,78.0,-48.03
2018-05-21 14:00:00,87.2,-47.79,89.9,-47.81,59.9,-47.66,56.1,-47.89
2018-05-21 15:00:00,80.6,-47.76,94.2,-47.82,53.7,-47.62,49.9,-47.82
2018-05-21 16:00:00,96.1,-47.81,94.9,-47.82,65.2,-47.67,59.9,-47.9
2018-05-21 17:00:00,113.5,-47.86,155.1,-48.04,69.5,-47.67,66.3,-47.86
2018-05-21 18:00:00,154.1,-48.02,199.1,-48.17,82.0,-47.68,79.3,-47.79
2018-05-21 19:00:00,158.6,-48.02,92.6,-47.65,82.6,-47.66,80.8,-47.7
2018-05-21 20:00:00,244.7,-48.34,189.7,-48.02,109.2,-47.72,100.2,-47.64
2018-05-21 21:00:00,260.6,-48.37,237.9,-48.23,104.5,-47.69,114.0,-47.65
2018-05-21 22:00:00,292.9,-48.48,166.6,-47.92,101.0,-47.68,115.9,-47.65
2018-05-21 23:00:00,301.9,-48.54,146.0,-47.9,114.2,-47.76,108.6,-47.75
2018-05-22 00:00:00,256.8,-48.46,136.7,-47.95,114.7,-47.83,108.0,-47.93
2018-05-22 01:00:00,221.1,-48.35,128.8,-47.95,107.3,-47.84,98.0,-48.0
2018-05-22 02:00:00,225.3,-48.35,127.0,-47.93,101.9,-47.8,95.0,-47.94
2018-05-22 03:00:00,211.5,-48.28,125.7,-47.91,97.4,-47.77,94.6,-47.89
2018-05-22 04:00:00,176.9,-48.15,122.4,-47.92,85.5,-47.73,83.6,-47.89
2018-05-22 05:00:00,179.4,-48.17,141.8,-48.01,86.2,-47.73,92.5,-47.9
2018-05-22 06:00:00,142.2,-48.03,101.7,-47.85,74.1,-47.68,73.6,-47.87
2018-05-22 07:00:00,132.0,-47.99,114.7,-47.92,70.5,-47.67,73.2,-47.88
2018-05-22 08:00:00,108.8,-47.89,93.7,-47.81,60.4,-47.64,64.1,-47.87
2018-05-22 09:00:00,95.3,-47.82,72.1,-47.7,54.8,-47.63,51.9,-47.84
2018-05-22 10:00:00,84.8,-47.76,63.7,-47.66,51.0,-47.62,45.9,-47.82
2018-05-22 11:00:00,79.1,-47.73,57.8,-47.63,49.5,-47.62,42.6,-47.81
2018-05-22 12:00:00,70.6,-47.7,54.3,-47.62,46.5,-47.61,39.9,-47.8
2018-05-22 13:00:00,66.9,-47.68,53.1,-47.62,46.2,-47.6,38.2,-47.8
2018-05-22 14:00:00,64.0,-47.68,48.5,-47.61,44.5,-47.59,35.3,-47.8
2018-05-22 15:00:00,63.1,-47.69,48.0,-47.62,42.6,-47.59,33.5,-47.81
2018-05-22 16:00:00,68.9,-47.7,52.1,-47.62,43.4,-47.59,36.8,-47.8
2018-05-22 17:00:00,75.0,-47.7,59.0,-47.62,43.8,-47.59,42.7,-47.78
2018-05-22 18:00:00,82.8,-47.71,65.6,-47.62,45.7,-47.6,48.0,-47.79
2018-05-22 19:00:00,86.3,-47.73,73.8,-47.67,45.8,-47.6,47.1,-47.8
2018-05-22 20:00:00,92.5,-47.76,82.1,-47.71,48.4,-47.61,48.0,-47.79
2018-05-22 21:00:00,96.8,-47.8,67.2,-47.65,49.9,-47.62,48.2,-47.79
2018-05-22 22:00:00,99.3,-47.82,66.4,-47.65,51.4,-47.62,49.2,-47.8
2018-05-22 23:00:00,99.8,-47.83,70.8,-47.69,51.3,-47.62,48.9,-47.82
2018-05-23 00:00:00,98.0,-47.82,65.4,-47.66,50.9,-47.62,45.4,-47.81
2018-05-23 01:00:00,96.9,-47.82,62.5,-47.67,50.0,-47.62,41.0,-47.82
2018-05-23 02:00:00,98.3,-47.83,64.8,-47.67,50.0,-47.61,42.1,-47.81
2018-05-23 03:00:00,99.9,-47.83,64.0,-47.66,49.1,-47.6,43.1,-47.78
2018-05-23 04:00:00,104.1,-47.85,68.1,-47.67,49.7,-47.61,45.1,-47.79
2018-05-23 05:00:00,98.4,-47.82,63.0,-47.66,48.0,-47.61,42.3,-47.81
2018-05-23 06:00:00,89.9,-47.78,56.2,-47.63,45.0,-47.61,38.4,-47.81
2018-05-23 07:00:00,85.7,-47.76,55.6,-47.62,44.1,-47.61,36.9,-47.81
2018-05-23 08:00:00,81.4,-47.74,56.1,-47.62,43.0,-47.61,37.9,-47.81
2018-05-23 09:00:00,79.2,-47.73,55.3,-47.63,42.5,-47.61,37.4,-47.82
2018-05-23 10:00:00,77.2,-47.73,59.2,-47.63,42.8,-47.61,39.8,-47.81
2018-05-23 11:00:00,75.5,-47.71,56.8,-47.62,42.2,-47.61,38.5,-47.82
2018-05-23 12:00:00,71.4,-47.69,58.6,-47.61,40.9,-47.6,40.2,-47.79
2018-05-23 13:00:00,68.7,-47.66,63.3,-47.62,39.8,-47.59,41.5,-47.78
2018-05-23 14:00:00,64.9,-47.65,59.3,-47.61,39.8,-47.59,40.0,-47.78
2018-05-23 15:00:00,67.7,-47.67,58.3,-47.63,41.9,-47.59,39.2,-47.79
2018-05-23 16:00:00,75.0,-47.71,64.1,-47.66,43.4,-47.6,40.4,-47.79
2018-05-23 17:00:00,82.4,-47.74,65.9,-47.66,47.0,-47.61,42.9,-47.79
2018-05-23 18:00:00,89.1,-47.77,63.1,-47.65,49.2,-47.61,43.3,-47.79
2018-05-23 19:00:00,96.1,-47.8,77.6,-47.72,50.3,-47.62,45.7,-47.79
2018-05-23 20:00:00,98.2,-47.81,93.6,-47.78,49.8,-47.61,50.1,-47.78
2018-05-23 21:00:00,107.8,-47.84,103.4,-47.83,52.6,-47.63,53.2,-47.79
2018-05-23 22:00:00,111.6,-47.86,121.7,-47.9,53.1,-47.63,57.0,-47.79
2018-05-23 23:00:00,122.8,-47.89,137.9,-47.96,55.2,-47.63,63.6,-47.8
2018-05-24 00:00:00,134.8,-47.95,136.7,-47.95,58.1,-47.64,67.2,-47.8
2018-05-24 01:00:00,134.7,-47.94,129.7,-47.92,59.7,-47.64,67.1,-47.79
2018-05-24 02:00:00,140.7,-47.97,121.9,-47.86,63.1,-47.66,66.4,-47.76
2018-05-24 03:00:00,151.6,-48.01,154.2,-48.01,66.8,-47.67,75.4,-47.79
2018-05-24 04:00:00,155.4,-48.03,162.5,-48.05,69.1,-47.68,78.7,-47.81
2018-05-24 05:00:00,155.6,-48.04,145.7,-47.99,68.9,-47.69,72.1,-47.81
2018-05-24 06:00:00,155.2,-48.04,139.5,-47.97,70.8,-47.7,73.4,-47.84
2018-05-24 07:00:00,154.3,-48.05,118.7,-47.88,71.2,-47.71,72.3,-47.86
2018-05-24 08:00:00,141.6,-48.01,96.4,-47.79,70.6,-47.71,64.2,-47.87
2018-05-24 09:00:00,141.9,-48.01,113.3,-47.86,68.4,-47.7,65.9,-47.86
2018-05-24 10:00:00,141.5,-48.01,93.9,-47.78,67.0,-47.69,61.7,-47.85
2018-05-24 11:00:00,146.4,-48.04,85.0,-47.75,68.6,-47.7,57.9,-47.86
2018-05-24 12:00:00,143.9,-48.03,84.7,-47.76,79.3,-47.75,67.0,-47.9
2018-05-24 13:00:00,143.0,-48.01,93.8,-47.77,86.1,-47.71,74.6,-47.87
2018-05-24 14:00:00,120.5,-47.93,85.8,-47.75,80.5,-47.68,71.5,-47.92
2018-05-24 15:00:00,130.1,-47.95,106.0,-47.82,86.3,-47.65,92.1,-47.99
2018-05-24 16:00:00,155.5,-48.04,144.7,-47.96,104.1,-47.68,107.6,-48.0
2018-05-24 17:00:00,204.8,-48.2,265.9,-48.41,122.5,-47.81,127.2,-48.06
2018-05-24 18:00:00,182.1,-48.1,263.3,-48.39,116.9,-47.84,133.6,-48.11
2018-05-24 19:00:00,181.8,-48.09,247.5,-48.32,108.1,-47.76,116.6,-47.98
2018-05-24 20:00:00,171.7,-48.04,159.3,-48.0,103.5,-47.73,92.5,-47.91
2018-05-24 21:00:00,143.4,-48.04,123.5,-47.96,84.2,-47.76,76.4,-47.97
2018-05-24 22:00:00,136.9,-47.99,107.4,-47.86,73.4,-47.69,64.6,-47.87
2018-05-24 23:00:00,148.1,-48.03,105.4,-47.84,76.0,-47.69,68.2,-47.86
2018-05-25 00:00:00,161.7,-48.07,100.4,-47.81,82.4,-47.69,68.9,-47.88
2018-05-25 01:00:00,162.9,-48.09,97.2,-47.82,86.9,-47.74,69.3,-47.96
2018-05-25 02:00:00,174.4,-48.15,102.5,-47.84,90.2,-47.77,76.3,-47.97
2018-05-25 03:00:00,189.2,-48.19,111.9,-47.86,97.7,-47.78,84.1,-47.95
2018-05-25 04:00:00,212.8,-48.25,123.2,-47.84,109.0,-47.77,99.4,-47.85
2018-05-25 05:00:00,208.2,-48.22,125.3,-47.83,111.9,-47.76,104.7,-47.85
2018-05-25 06:00:00,204.5,-48.21,123.6,-47.85,107.6,-47.77,98.0,-47.87
2018-05-25 07:00:00,164.0,-48.06,108.3,-47.81,96.5,-47.75,87.5,-47.88
2018-05-25 08:00:00,156.2,-48.02,113.0,-47.81,97.9,-47.72,91.1,-47.86
2018-05-25 09:00:00,172.9,-48.07,126.2,-47.85,106.2,-47.72,96.7,-47.85
2018-05-25 10:00:00,183.7,-48.11,131.9,-47.85,113.7,-47.7,104.1,-47.87
2018-05-25 11:00:00,170.5,-48.03,128.3,-47.82,113.5,-47.65,107.8,-47.9
2018-05-25 12:00:00,163.5,-48.03,135.4,-47.88,116.2,-47.68,108.5,-47.95
2018-05-25 13:00:00,168.1,-48.06,140.8,-47.92,122.3,-47.72,106.2,-47.98
2018-05-25 14:00:00,146.8,-47.98,124.2,-47.88,110.2,-47.7,95.1,-47.95
2018-05-25 15:00:00,140.6,-47.95,120.9,-47.85,102.8,-47.68,93.3,-47.91
2018-05-25 16:00:00,151.3,-47.98,143.1,-47.94,106.0,-47.67,92.6,-47.88
2018-05-25 17:00:00,170.2,-48.05,171.7,-48.03,110.9,-47.69,98.2,-47.84
2018-05-25 18:00:00,217.7,-48.22,217.0,-48.21,123.7,-47.72,121.5,-47.89
2018-05-25 19:00:00,262.8,-48.37,269.0,-48.41,128.1,-47.73,137.0,-47.93
2018-05-25 20:00:00,274.6,-48.43,326.6,-48.64,127.8,-47.75,133.0,-47.93
2018-05-25 21:00:00,331.6,-48.62,460.2,-49.08,146.0,-47.79,151.9,-47.93
2018-05-25 22:00:00,389.6,-48.81,485.5,-49.14,163.3,-47.85,172.0,-47.97
2018-05-25 23:00:00,371.3,-48.75,371.5,-48.79,152.3,-47.85,162.9,-48.06
2018-05-26 00:00:00,360.2,-48.72,405.8,-48.91,156.8,-47.88,154.9,-48.05
2018-05-26 01:00:00,375.8,-48.76,406.9,-48.9,169.2,-47.9,160.9,-48.03
2018-05-26 02:00:00,388.2,-48.76,263.7,-48.32,167.2,-47.89,179.9,-48.03
2018-05-26 03:00:00,275.4,-48.38,257.2,-48.32,155.9,-47.84,155.4,-48.03
2018-05-26 04:00:00,308.8,-48.47,325.3,-48.54,172.2,-47.88,182.3,-48.08
2018-05-26 05:00:00,313.7,-48.51,322.3,-48.55,171.1,-47.9,180.9,-48.11
2018-05-26 06:00:00,285.5,-48.41,283.8,-48.46,163.2,-47.88,152.6,-48.07
2018-05-26 07:00:00,267.3,-48.35,270.9,-48.39,163.1,-47.87,158.0,-48.06
2018-05-26 08:00:00,302.0,-48.41,281.0,-48.37,186.1,-47.9,189.3,-48.15
2018-05-26 09:00:00,292.8,-48.32,263.9,-48.26,203.8,-47.92,205.9,-48.23
2018-05-26 10:00:00,224.4,-48.16,211.7,-48.14,170.7,-47.87,166.5,-48.18
2018-05-26 11:00:00,197.7,-48.09,194.1,-48.11,164.0,-47.87,143.9,-48.17
2018-05-26 12:00:00,182.4,-48.01,177.1,-48.03,163.3,-47.82,137.6,-48.13
2018-05-26 13:00:00,161.9,-47.94,154.4,-47.95,144.3,-47.79,118.0,-48.04
2018-05-26 14:00:00,148.7,-47.91,147.7,-47.94,130.4,-47.77,105.6,-47.99
2018-05-26 15:00:00,147.9,-47.92,148.4,-47.95,127.9,-47.77,103.9,-48.0
2018-05-26 16:00:00,168.8,-48.0,171.3,-48.05,147.8,-47.82,119.9,-48.08
2018-05-26 17:00:00,199.8,-48.11,206.7,-48.23,172.8,-47.9,144.2,-48.25
2018-05-26 18:00:00,213.6,-48.18,219.5,-48.28,178.9,-47.97,152.3,-48.31
2018-05-26 19:00:00,190.3,-48.17,198.2,-48.26,147.3,-47.95,122.6,-48.26
2018-05-26 20:00:00,175.4,-48.16,216.9,-48.37,123.7,-47.9,106.2,-48.2
2018-05-26 21:00:00,184.3,-48.21,219.7,-48.39,120.7,-47.89,106.1,-48.18
2018-05-26 22:00:00,184.6,-48.19,223.1,-48.38,111.3,-47.84,104.7,-48.11
2018-05-26 23:00:00,195.0,-48.11,272.6,-48.47,135.5,-47.78,115.7,-47.99
2018-05-27 00:00:00,206.6,-48.12,197.2,-48.11,140.8,-47.76,115.9,-47.88
2018-05-27 01:00:00,247.1,-48.3,205.0,-48.17,134.4,-47.77,132.3,-47.95
2018-05-27 02:00:00,243.0,-48.3,264.6,-48.41,133.2,-47.79,131.7,-47.98
2018-05-27 03:00:00,267.4,-48.39,301.2,-48.56,134.2,-47.81,128.2,-47.98
2018-05-27 04:00:00,283.7,-48.43,306.5,-48.55,141.9,-47.83,147.3,-48.02
2018-05-27 05:00:00,265.1,-48.37,279.4,-48.44,139.6,-47.82,144.5,-48.0
2018-05-27 06:00:00,227.6,-48.26,234.1,-48.31,125.7,-47.81,128.2,-48.01
2018-05-27 07:00:00,237.9,-48.29,280.6,-48.47,158.2,-47.9,144.8,-48.11
2018-05-27 08:00:00,216.1,-48.2,279.7,-48.46,161.8,-47.86,159.7,-48.14
2018-05-27 09:00:00,269.5,-48.39,370.5,-48.78,189.9,-47.93,189.5,-48.24
2018-05-27 10:00:00,302.1,-48.49,435.7,-48.98,200.3,-47.94,201.0,-48.23
2018-05-27 11:00:00,296.9,-48.47,406.2,-48.89,196.4,-47.92,194.8,-48.21
2018-05-27 12:00:00,292.8,-48.47,315.2,-48.56,184.6,-47.89,172.3,-48.06
2018-05-27 13:00:00,247.0,-48.33,198.1,-48.12,159.9,-47.82,137.1,-47.93
2018-05-27 14:00:00,164.0,-48.05,126.4,-47.89,115.5,-47.72,90.4,-47.83
2018-05-27 15:00:00,78.4,-47.75,49.4,-47.61,60.2,-47.6,37.0,-47.66
2018-05-27 16:00:00,73.1,-47.73,48.6,-47.62,54.8,-47.59,32.7,-47.64
2018-05-27 17:00:00,74.4,-47.74,48.8,-47.62,56.9,-47.59,33.2,-47.65
2018-05-27 18:00:00,80.0,-47.76,47.4,-47.6,59.2,-47.58,35.2,-47.64
2018-05-27 19:00:00,87.3,-47.79,51.0,-47.6,61.9,-47.57,39.3,-47.61
2018-05-27 20:00:00,126.1,-47.94,66.3,-47.64,82.3,-47.57,48.9,-47.6
2018-05-27 21:00:00,235.7,-48.33,142.6,-47.86,127.7,-47.58,84.2,-47.51
2018-05-27 22:00:00,364.3,-48.75,638.6,-49.59,171.9,-47.8,146.0,-47.74
2018-05-27 23:00:00,462.7,-49.06,774.3,-49.93,202.1,-47.87,168.7,-47.69
2018-05-28 00:00:00,469.5,-49.03,547.9,-49.16,231.3,-47.74,193.4,-47.49
2018-05-28 01:00:00,445.5,-48.9,394.8,-48.56,256.7,-47.65,219.5,-47.46
2018-05-28 02:00:00,574.3,-49.3,744.0,-49.72,240.9,-47.92,260.8,-47.67
2018-05-28 03:00:00,543.9,-49.2,637.7,-49.48,219.3,-47.91,253.8,-47.8
2018-05-28 04:00:00,529.4,-49.17,630.9,-49.47,216.6,-47.92,255.7,-47.88
2018-05-28 05:00:00,466.1,-49.01,491.0,-49.08,203.1,-47.91,226.1,-47.89
2018-05-28 06:00:00,374.6,-48.71,223.5,-48.13,171.3,-47.86,179.2,-47.91
2018-05-28 07:00:00,298.0,-48.47,220.5,-48.17,153.1,-47.83,151.2,-47.95
2018-05-28 08:00:00,232.0,-48.25,163.6,-47.98,140.0,-47.81,126.5,-47.91
2018-05-28 09:00:00,233.1,-48.25,158.2,-47.96,144.1,-47.83,124.6,-47.95
2018-05-28 10:00:00,216.3,-48.24,170.0,-48.05,131.7,-47.85,119.1,-48.03
2018-05-28 11:00:00,196.9,-48.19,156.9,-48.02,120.6,-47.82,112.2,-48.01
2018-05-28 12:00:00,182.3,-48.13,134.2,-47.94,114.0,-47.8,100.5,-48.0
2018-05-28 13:00:00,166.8,-48.08,132.4,-47.95,107.8,-47.79,95.7,-48.0
2018-05-28 14:00:00,147.4,-48.01,114.1,-47.88,99.9,-47.76,84.2,-47.95
2018-05-28 15:00:00,148.6,-48.02,114.2,-47.89,101.8,-47.78,83.7,-47.97
2018-05-28 16:00:00,146.2,-48.02,123.0,-47.93,104.1,-47.79,88.2,-48.01
2018-05-28 17:00:00,142.0,-48.01,105.9,-47.86,103.2,-47.8,81.3,-48.0
2018-05-28 18:00:00,135.9,-48.0,100.7,-47.86,99.5,-47.8,77.6,-48.04
2018-05-28 19:00:00,151.6,-48.08,113.8,-47.92,105.2,-47.84,83.9,-48.09
2018-05-28 20:00:00,163.2,-48.13,134.8,-48.04,112.0,-47.88,92.8,-48.18
2018-05-28 21:00:00,163.1,-48.14,154.8,-48.12,114.5,-47.89,99.5,-48.19
2018-05-28 22:00:00,171.7,-48.17,173.9,-48.19,117.1,-47.9,107.3,-48.21
2018-05-28 23:00:00,182.5,-48.19,185.1,-48.23,121.2,-47.9,113.4,-48.21
2018-05-29 00:00:00,187.3,-48.21,187.1,-48.23,123.0,-47.9,114.4,-48.2
2018-05-29 01:00:00,194.6,-48.23,183.5,-48.19,126.3,-47.91,116.9,-48.19
2018-05-29 02:00:00,205.5,-48.27,173.1,-48.13,129.2,-47.92,114.5,-48.15
2018-05-29 03:00:00,213.7,-48.27,177.8,-48.1,131.8,-47.91,120.1,-48.12
2018-05-29 04:00:00,206.5,-48.23,163.9,-48.05,128.0,-47.9,113.7,-48.11
2018-05-29 05:00:00,194.9,-48.18,165.8,-48.06,122.4,-47.88,109.6,-48.09
2018-05-29 06:00:00,182.1,-48.12,146.0,-47.98,117.3,-47.85,106.7,-48.09
2018-05-29 07:00:00,174.8,-48.09,158.2,-48.03,114.4,-47.84,103.4,-48.06
2018-05-29 08:00:00,173.1,-48.07,164.0,-48.05,111.4,-47.82,104.3,-48.04
2018-05-29 09:00:00,174.7,-48.07,142.7,-47.96,112.2,-47.82,101.1,-48.05
2018-05-29 10:00:00,172.9,-48.07,127.8,-47.9,111.1,-47.81,99.4,-48.05
2018-05-29 11:00:00,167.4,-48.06,133.2,-47.93,107.5,-47.81,96.5,-48.05
2018-05-29 12:00:00,163.0,-48.04,128.4,-47.9,101.6,-47.76,93.1,-47.99
2018-05-29 13:00:00,177.0,-48.09,119.9,-47.86,104.1,-47.76,91.1,-47.98
2018-05-29 14:00:00,170.3,-48.08,106.0,-47.8,98.8,-47.76,81.4,-47.97
2018-05-29 15:00:00,168.5,-48.09,91.4,-47.76,96.3,-47.75,76.5,-47.98
2018-05-29 16:00:00,152.4,-48.03,96.5,-47.8,89.1,-47.73,72.8,-47.98
2018-05-29 17:00:00,136.4,-47.97,107.4,-47.86,83.8,-47.72,69.9,-47.98
2018-05-29 18:00:00,135.9,-47.98,110.3,-47.87,83.8,-47.73,70.5,-47.98
2018-05-29 19:00:00,133.5,-47.97,116.2,-47.91,82.6,-47.72,70.7,-47.98
2018-05-29 20:00:00,130.4,-47.96,123.7,-47.93,79.9,-47.72,73.0,-47.98
2018-05-29 21:00:00,129.1,-47.98,106.7,-47.89,74.7,-47.71,63.9,-48.0
2018-05-29 22:00:00,126.2,-47.97,85.4,-47.79,71.0,-47.7,55.0,-47.98
2018-05-29 23:00:00,130.4,-47.99,95.8,-47.84,71.4,-47.7,55.8,-48.0
2018-05-30 00:00:00,146.4,-48.05,106.4,-47.88,75.6,-47.71,58.4,-47.99
2018-05-30 01:00:00,178.6,-48.16,99.3,-47.81,83.7,-47.72,67.5,-47.95
2018-05-30 02:00:00,203.7,-48.24,104.1,-47.79,91.4,-47.73,70.4,-47.94
2018-05-30 03:00:00,210.3,-48.23,115.0,-47.81,94.1,-47.74,79.0,-47.94
2018-05-30 04:00:00,209.1,-48.22,129.6,-47.87,91.3,-47.73,82.0,-47.93
2018-05-30 05:00:00,185.0,-48.14,180.3,-48.11,92.1,-47.74,90.9,-47.98
2018-05-30 06:00:00,182.2,-48.13,188.1,-48.14,96.2,-47.75,93.7,-47.98
2018-05-30 07:00:00,181.1,-48.11,180.1,-48.11,96.4,-47.75,95.7,-47.98
2018-05-30 08:00:00,188.8,-48.14,207.6,-48.21,100.9,-47.76,96.3,-47.99
2018-05-30 09:00:00,195.6,-48.17,226.8,-48.3,104.9,-47.78,97.7,-48.0
2018-05-30 10:00:00,206.1,-48.2,273.6,-48.49,113.1,-47.8,109.3,-48.06
2018-05-30 11:00:00,221.9,-48.27,310.6,-48.62,124.2,-47.82,131.2,-48.16
2018-05-30 12:00:00,229.4,-48.29,284.9,-48.53,130.4,-47.83,125.6,-48.14
2018-05-30 13:00:00,219.6,-48.25,215.4,-48.26,128.9,-47.81,110.7,-48.05
2018-05-30 14:00:00,179.2,-48.11,142.0,-47.96,116.6,-47.77,94.7,-47.97
2018-05-30 15:00:00,154.5,-48.03,99.5,-47.8,110.4,-47.77,84.3,-47.92
2018-05-30 16:00:00,180.1,-48.12,112.3,-47.82,120.7,-47.78,95.3,-47.87
2018-05-30 17:00:00,255.8,-48.38,189.9,-48.08,142.3,-47.8,129.7,-47.86
2018-05-30 18:00:00,266.7,-48.43,203.8,-48.14,144.0,-47.82,132.2,-47.87
2018-05-30 19:00:00,255.5,-48.45,202.3,-48.21,147.7,-47.88,116.3,-47.88
2018-05-30 20:00:00,382.0,-48.92,258.8,-48.37,195.7,-48.04,148.2,-47.8
2018-05-30 21:00:00,582.1,-49.42,744.7,-49.8,242.0,-48.08,234.9,-47.84
2018-05-30 22:00:00,664.6,-49.6,1149.9,-50.73,259.2,-48.09,296.5,-47.95
2018-05-30 23:00:00,777.8,-49.92,1541.6,-51.45,313.7,-48.21,360.1,-48.28
2018-05-31 00:00:00,484.0,-49.19,774.8,-50.02,218.4,-48.04,262.2,-48.36
2018-05-31 01:00:00,343.6,-48.77,535.9,-49.41,174.2,-47.97,183.5,-48.18
2018-05-31 02:00:00,334.9,-48.75,546.4,-49.44,169.8,-47.97,189.4,-48.15
2018-05-31 03:00:00,377.3,-48.87,598.8,-49.58,184.2,-48.0,220.2,-48.24
2018-05-31 04:00:00,349.6,-48.79,518.8,-49.35,173.3,-47.98,198.7,-48.15
2018-05-31 05:00:00,335.1,-48.74,459.5,-49.17,167.0,-47.96,167.9,-48.01
2018-05-31 06:00:00,338.4,-48.74,466.2,-49.18,164.6,-47.95,164.3,-47.96
2018-05-31 07:00:00,334.9,-48.72,408.7,-48.99,160.6,-47.94,153.9,-47.9
2018-05-31 08:00:00,337.1,-48.73,465.6,-49.18,160.8,-47.94,157.0,-47.92
2018-05-31 09:00:00,337.8,-48.72,479.8,-49.23,161.1,-47.93,167.8,-48.02
2018-05-31 10:00:00,292.0,-48.54,325.0,-48.68,148.6,-47.9,158.8,-48.04
2018-05-31 11:00:00,205.6,-48.22,207.8,-48.22,122.4,-47.86,102.9,-47.91
2018-05-31 12:00:00,167.6,-48.04,193.2,-48.14,111.5,-47.82,97.2,-47.88
2018-05-31 13:00:00,159.2,-47.97,182.4,-48.05,108.9,-47.79,105.0,-47.87
2018-05-31 14:00:00,153.2,-47.94,181.9,-48.06,104.0,-47.76,96.7,-47.83
2018-05-31 15:00:00,140.7,-47.94,154.7,-48.01,98.5,-47.76,77.8,-47.79
2018-05-31 16:00:00,146.9,-47.94,162.4,-48.03,104.1,-47.76,91.7,-47.86
2018-05-31 17:00:00,164.9,-47.98,196.9,-48.11,115.3,-47.79,112.0,-47.92
2018-05-31 18:00:00,178.8,-48.06,231.7,-48.27,118.0,-47.8,110.4,-47.91
2018-05-31 19:00:00,191.0,-48.11,278.0,-48.41,121.3,-47.8,123.6,-47.92
2018-05-31 20:00:00,204.4,-48.15,295.9,-48.5,126.8,-47.82,136.9,-47.99
2018-05-31 21:00:00,247.4,-48.29,367.9,-48.7,143.4,-47.85,156.0,-47.97
2018-05-31 22:00:00,280.7,-48.4,420.2,-48.84,158.0,-47.89,167.2,-47.95
2018-05-31 23:00:00,336.9,-48.58,499.5,-49.09,177.2,-47.92,182.1,-47.94
2018-06-01 00:00:00,398.1,-48.78,587.9,-49.36,201.1,-47.97,195.9,-47.98
2018-06-01 01:00:00,353.8,-48.68,372.6,-48.67,204.0,-47.88,174.8,-47.89
2018-06-01 02:00:00,265.4,-48.41,191.6,-48.05,179.5,-47.76,127.3,-47.88
2018-06-01 03:00:00,274.1,-48.47,189.5,-48.05,178.9,-47.76,122.3,-47.86
2018-06-01 04:00:00,244.8,-48.37,173.0,-48.02,166.9,-47.76,113.6,-47.87
2018-06-01 05:00:00,224.9,-48.3,149.6,-47.96,160.2,-47.78,106.8,-47.88
2018-06-01 06:00:00,212.6,-48.26,137.8,-47.92,155.3,-47.76,101.9,-47.86
2018-06-01 07:00:00,195.6,-48.21,129.4,-47.91,151.3,-47.78,96.1,-47.88
2018-06-01 08:00:00,162.4,-48.1,107.2,-47.84,134.1,-47.79,82.0,-47.86
2018-06-01 09:00:00,144.5,-48.05,89.3,-47.8,119.2,-47.78,66.4,-47.85
2018-06-01 10:00:00,143.2,-48.05,85.1,-47.79,116.5,-47.79,62.2,-47.86
2018-06-01 11:00:00,136.1,-48.03,83.9,-47.8,112.4,-47.79,57.7,-47.87
2018-06-01 12:00:00,135.9,-48.04,79.6,-47.81,111.8,-47.83,55.1,-47.91
2018-06-01 13:00:00,139.2,-48.07,81.6,-47.83,112.2,-47.85,55.5,-47.94
2018-06-01 14:00:00,141.4,-48.09,92.6,-47.9,120.0,-47.91,59.1,-48.02
2018-06-01 15:00:00,145.8,-48.08,96.8,-47.9,122.8,-47.89,63.7,-48.02
2018-06-01 16:00:00,138.3,-48.05,84.5,-47.84,115.5,-47.87,54.5,-47.96
2018-06-01 17:00:00,134.1,-48.03,79.1,-47.82,111.6,-47.85,49.8,-47.93
2018-06-01 18:00:00,135.9,-48.03,77.1,-47.79,110.0,-47.82,48.8,-47.9
2018-06-01 19:00:00,150.4,-48.08,82.0,-47.79,117.2,-47.81,52.6,-47.88
2018-06-01 20:00:00,169.9,-48.15,93.2,-47.82,128.7,-47.81,61.2,-47.88
2018-06-01 21:00:00,197.6,-48.26,107.6,-47.86,146.8,-47.83,73.9,-47.88
2018-06-01 22:00:00,230.6,-48.37,134.4,-47.95,174.8,-47.88,94.6,-47.91
2018-06-01 23:00:00,234.5,-48.4,159.9,-48.07,196.0,-47.98,118.0,-48.02
2018-06-02 00:00:00,179.7,-48.23,133.8,-48.02,169.3,-48.02,123.9,-48.15
2018-06-02 01:00:00,177.7,-48.21,132.8,-48.01,162.9,-47.98,122.2,-48.14
2018-06-02 02:00:00,181.5,-48.23,150.4,-48.08,164.2,-47.98,136.2,-48.18
2018-06-02 03:00:00,177.2,-48.21,151.6,-48.1,157.4,-47.97,137.9,-48.2
2018-06-02 04:00:00,180.6,-48.22,145.9,-48.07,158.3,-47.97,129.8,-48.15
2018-06-02 05:00:00,178.7,-48.23,144.1,-48.07,158.6,-47.98,125.4,-48.16
2018-06-02 06:00:00,177.6,-48.23,139.2,-48.07,163.1,-48.02,126.7,-48.22
2018-06-02 07:00:00,170.2,-48.21,134.3,-48.08,159.2,-48.04,119.7,-48.24
2018-06-02 08:00:00,157.3,-48.17,123.3,-48.05,146.2,-48.03,108.6,-48.23
2018-06-02 09:00:00,144.2,-48.12,106.8,-47.98,131.5,-47.99,92.2,-48.15
2018-06-02 10:00:00,128.5,-48.03,91.6,-47.9,116.8,-47.91,72.7,-48.04
2018-06-02 11:00:00,114.2,-47.97,73.7,-47.81,105.4,-47.86,56.9,-47.97
2018-06-02 12:00:00,102.3,-47.91,63.7,-47.76,95.1,-47.82,51.4,-47.94
2018-06-02 13:00:00,82.0,-47.81,52.9,-47.71,76.1,-47.73,40.0,-47.86
2018-06-02 14:00:00,70.4,-47.77,47.4,-47.68,66.2,-47.71,37.6,-47.85
2018-06-02 15:00:00,59.7,-47.73,42.5,-47.66,55.5,-47.67,34.4,-47.82
2018-06-02 16:00:00,58.3,-47.72,42.5,-47.66,55.1,-47.67,36.4,-47.83
2018-06-02 17:00:00,58.2,-47.72,42.7,-47.66,55.9,-47.67,36.9,-47.82
2018-06-02 18:00:00,63.9,-47.72,43.8,-47.63,57.5,-47.62,30.5,-47.73
2018-06-02 19:00:00,91.8,-47.8,56.2,-47.62,68.0,-47.56,37.4,-47.65
2018-06-02 20:00:00,116.6,-47.88,84.8,-47.71,96.6,-47.6,51.0,-47.6
2018-06-02 21:00:00,131.1,-47.94,98.1,-47.76,113.0,-47.65,64.1,-47.64
2018-06-02 22:00:00,146.6,-48.0,105.9,-47.77,120.0,-47.67,80.1,-47.66
2018-06-02 23:00:00,184.1,-48.13,136.0,-47.84,143.3,-47.67,119.9,-47.7
2018-06-03 00:00:00,223.3,-48.26,174.1,-47.95,172.1,-47.7,164.1,-47.77
2018-06-03 01:00:00,246.2,-48.34,188.6,-47.99,181.0,-47.71,197.0,-47.85
2018-06-03 02:00:00,285.3,-48.46,185.7,-47.93,187.2,-47.69,206.9,-47.75
2018-06-03 03:00:00,318.4,-48.57,185.7,-47.89,186.9,-47.68,207.7,-47.65
2018-06-03 04:00:00,345.9,-48.66,191.7,-47.9,193.4,-47.69,206.3,-47.6
2018-06-03 05:00:00,329.1,-48.63,178.3,-47.89,176.3,-47.71,176.9,-47.59
2018-06-03 06:00:00,316.6,-48.61,203.6,-48.03,160.1,-47.75,161.1,-47.58
2018-06-03 07:00:00,344.4,-48.71,319.0,-48.51,161.9,-47.78,158.3,-47.6
2018-06-03 08:00:00,265.2,-48.47,275.9,-48.45,125.2,-47.74,110.8,-47.65
2018-06-03 09:00:00,151.4,-48.06,149.6,-48.02,79.1,-47.65,67.4,-47.66
2018-06-03 10:00:00,107.6,-47.89,92.3,-47.8,61.5,-47.61,49.4,-47.65
2018-06-03 11:00:00,92.6,-47.84,79.3,-47.75,56.2,-47.6,41.9,-47.66
2018-06-03 12:00:00,88.9,-47.82,73.2,-47.73,54.2,-47.59,39.1,-47.66
2018-06-03 13:00:00,92.2,-47.84,94.7,-47.83,54.7,-47.6,39.5,-47.68
2018-06-03 14:00:00,96.1,-47.86,111.5,-47.92,52.1,-47.61,42.3,-47.69
2018-06-03 15:00:00,126.4,-47.99,135.3,-48.04,69.2,-47.69,61.3,-47.82
2018-06-03 16:00:00,142.5,-48.07,142.8,-48.09,87.6,-47.78,77.0,-47.98
2018-06-03 17:00:00,137.9,-48.06,137.3,-48.08,89.2,-47.8,72.3,-47.99
2018-06-03 18:00:00,132.8,-48.03,140.0,-48.08,86.7,-47.79,70.5,-47.97
2018-06-03 19:00:00,153.4,-48.11,189.9,-48.27,95.7,-47.81,78.4,-47.99
2018-06-03 20:00:00,176.4,-48.18,239.2,-48.45,102.2,-47.81,96.1,-48.01
2018-06-03 21:00:00,183.5,-48.21,259.8,-48.52,104.5,-47.81,95.6,-48.01
2018-06-03 22:00:00,194.8,-48.24,276.4,-48.57,110.1,-47.83,116.6,-48.08
2018-06-03 23:00:00,220.9,-48.32,336.1,-48.77,117.3,-47.83,131.7,-48.04
2018-06-04 00:00:00,264.3,-48.47,390.7,-48.95,133.6,-47.87,120.1,-47.91
2018-06-04 01:00:00,311.4,-48.63,438.7,-49.1,148.7,-47.91,124.2,-47.87
2018-06-04 02:00:00,291.7,-48.56,351.5,-48.83,144.7,-47.9,109.8,-47.88
2018-06-04 03:00:00,262.1,-48.45,266.9,-48.53,135.9,-47.89,100.0,-47.91
2018-06-04 04:00:00,256.2,-48.44,231.4,-48.39,132.5,-47.89,100.5,-47.96
2018-06-04 05:00:00,237.2,-48.37,217.5,-48.34,131.4,-47.9,86.0,-47.92
2018-06-04 06:00:00,234.4,-48.35,219.1,-48.36,135.7,-47.9,87.4,-47.93
2018-06-04 07:00:00,212.3,-48.27,174.7,-48.18,126.3,-47.88,85.1,-47.95
2018-06-04 08:00:00,168.3,-48.06,114.7,-47.89,101.6,-47.76,75.5,-47.86
2018-06-04 09:00:00,129.1,-47.88,85.6,-47.74,79.8,-47.66,60.6,-47.74
2018-06-04 10:00:00,125.3,-47.85,84.6,-47.72,78.2,-47.64,58.9,-47.76
2018-06-04 11:00:00,119.6,-47.81,85.1,-47.72,76.0,-47.63,58.3,-47.76
2018-06-04 12:00:00,114.6,-47.8,87.8,-47.72,72.0,-47.62,58.1,-47.69
2018-06-04 13:00:00,110.3,-47.79,91.1,-47.74,70.3,-47.62,55.4,-47.76
2018-06-04 14:00:00,109.8,-47.78,79.3,-47.69,70.3,-47.62,53.8,-47.72
2018-06-04 15:00:00,106.4,-47.76,74.0,-47.67,70.1,-47.61,54.4,-47.71
2018-06-04 16:00:00,104.3,-47.76,76.9,-47.68,69.6,-47.62,52.5,-47.7
2018-06-04 17:00:00,114.5,-47.78,85.2,-47.69,72.5,-47.63,56.6,-47.72
2018-06-04 18:00:00,131.0,-47.8,88.8,-47.63,73.5,-47.63,65.8,-47.67
2018-06-04 19:00:00,147.5,-47.87,83.1,-47.63,82.5,-47.65,63.6,-47.67
2018-06-04 20:00:00,150.0,-47.91,82.4,-47.65,83.4,-47.64,60.8,-47.66
2018-06-04 21:00:00,143.0,-47.89,92.4,-47.72,81.4,-47.62,59.8,-47.66
2018-06-04 22:00:00,132.2,-47.86,110.7,-47.8,78.2,-47.62,62.1,-47.65
2018-06-04 23:00:00,128.5,-47.82,106.7,-47.77,76.4,-47.59,57.0,-47.66
2018-06-05 00:00:00,123.5,-47.79,95.0,-47.71,73.4,-47.57,48.8,-47.63
2018-06-05 01:00:00,120.2,-47.78,94.8,-47.7,69.1,-47.55,50.5,-47.61
2018-06-05 02:00:00,115.4,-47.77,96.0,-47.73,66.2,-47.56,46.5,-47.6
2018-06-05 03:00:00,113.2,-47.78,103.4,-47.78,66.1,-47.57,41.7,-47.61
2018-06-05 04:00:00,111.9,-47.79,98.5,-47.77,65.1,-47.58,39.3,-47.63
2018-06-05 05:00:00,104.6,-47.78,84.7,-47.71,60.3,-47.57,38.7,-47.62
2018-06-05 06:00:00,91.6,-47.74,73.3,-47.68,51.9,-47.56,35.4,-47.62
2018-06-05 07:00:00,81.0,-47.72,64.9,-47.67,45.0,-47.56,29.6,-47.66
2018-06-05 08:00:00,78.3,-47.72,64.2,-47.67,44.7,-47.57,26.1,-47.64
2018-06-05 09:00:00,75.1,-47.71,64.6,-47.68,44.0,-47.56,24.7,-47.64
2018-06-05 10:00:00,72.6,-47.69,62.4,-47.66,41.5,-47.55,27.8,-47.61
2018-06-05 11:00:00,69.6,-47.68,59.1,-47.64,41.2,-47.54,25.9,-47.62
2018-06-05 12:00:00,69.2,-47.68,57.5,-47.64,42.1,-47.55,24.9,-47.62
2018-06-05 13:00:00,69.8,-47.68,58.3,-47.64,43.5,-47.55,26.6,-47.62
2018-06-05 14:00:00,67.5,-47.67,54.1,-47.63,42.4,-47.55,24.7,-47.65
2018-06-05 15:00:00,68.9,-47.67,50.5,-47.61,42.9,-47.55,25.2,-47.64
2018-06-05 16:00:00,66.5,-47.67,49.0,-47.6,40.5,-47.55,25.7,-47.66
2018-06-05 17:00:00,63.4,-47.66,49.6,-47.6,36.5,-47.54,25.5,-47.64
2018-06-05 18:00:00,60.9,-47.65,51.2,-47.61,31.0,-47.52,26.1,-47.63
2018-06-05 19:00:00,65.0,-47.67,56.9,-47.64,28.0,-47.51,27.1,-47.6
2018-06-05 20:00:00,77.1,-47.72,69.2,-47.68,27.0,-47.5,33.0,-47.56
2018-06-05 21:00:00,100.3,-47.82,94.5,-47.78,31.6,-47.51,43.6,-47.57
2018-06-05 22:00:00,108.4,-47.85,102.5,-47.81,33.4,-47.52,42.6,-47.56
2018-06-05 23:00:00,97.8,-47.81,124.0,-47.92,32.7,-47.52,35.0,-47.53
2018-06-06 00:00:00,95.6,-47.8,137.2,-47.98,32.0,-47.51,35.4,-47.51
2018-06-06 01:00:00,109.6,-47.85,122.7,-47.9,33.3,-47.51,43.2,-47.5
2018-06-06 02:00:00,134.4,-47.94,149.2,-48.0,37.8,-47.51,61.5,-47.53
2018-06-06 03:00:00,140.2,-47.98,160.6,-48.07,40.0,-47.52,58.5,-47.55
2018-06-06 04:00:00,91.4,-47.79,79.3,-47.73,27.3,-47.49,40.3,-47.51
2018-06-06 05:00:00,66.2,-47.69,47.9,-47.6,21.7,-47.47,25.8,-47.47
2018-06-06 06:00:00,61.5,-47.67,73.2,-47.73,20.2,-47.47,27.2,-47.51
2018-06-06 07:00:00,59.0,-47.66,64.7,-47.69,19.3,-47.47,24.8,-47.5
2018-06-06 08:00:00,53.5,-47.64,50.7,-47.63,18.5,-47.48,23.5,-47.54
2018-06-06 09:00:00,56.8,-47.66,56.6,-47.66,19.4,-47.49,23.9,-47.55
2018-06-06 10:00:00,58.3,-47.67,54.8,-47.65,20.8,-47.49,22.0,-47.56
2018-06-06 11:00:00,56.3,-47.66,48.7,-47.63,21.3,-47.5,23.0,-47.58
2018-06-06 12:00:00,54.3,-47.65,49.5,-47.64,21.4,-47.5,21.3,-47.57
2018-06-06 13:00:00,50.1,-47.64,47.2,-47.63,21.5,-47.51,19.7,-47.58
2018-06-06 14:00:00,47.9,-47.63,47.4,-47.63,22.9,-47.51,18.2,-47.6
2018-06-06 15:00:00,50.5,-47.64,47.8,-47.64,25.9,-47.52,19.7,-47.62
2018-06-06 16:00:00,52.6,-47.65,47.3,-47.63,26.3,-47.53,19.5,-47.62
2018-06-06 17:00:00,56.5,-47.67,67.9,-47.73,27.0,-47.53,22.2,-47.62
2018-06-06 18:00:00,78.5,-47.75,122.5,-47.95,33.4,-47.53,41.2,-47.66
2018-06-06 19:00:00,97.5,-47.82,168.6,-48.13,38.3,-47.54,52.6,-47.67
2018-06-06 20:00:00,119.3,-47.91,230.6,-48.36,44.7,-47.55,74.9,-47.72
2018-06-06 21:00:00,143.6,-48.01,249.9,-48.44,52.1,-47.57,72.2,-47.67
2018-06-06 22:00:00,138.5,-47.99,184.8,-48.19,50.2,-47.58,54.7,-47.64
2018-06-06 23:00:00,106.5,-47.85,110.3,-47.89,44.0,-47.59,40.7,-47.7
2018-06-07 00:00:00,97.5,-47.81,108.8,-47.88,40.2,-47.57,41.5,-47.66
2018-06-07 01:00:00,97.2,-47.81,121.0,-47.92,42.6,-47.58,39.3,-47.66
2018-06-07 02:00:00,126.8,-47.92,111.1,-47.83,46.3,-47.58,54.9,-47.64
2018-06-07 03:00:00,136.6,-47.96,159.2,-48.06,51.8,-47.6,62.5,-47.67
2018-06-07 04:00:00,171.4,-48.1,232.8,-48.35,60.7,-47.61,73.5,-47.67
2018-06-07 05:00:00,170.6,-48.1,185.7,-48.16,60.5,-47.62,69.9,-47.66
2018-06-07 06:00:00,175.0,-48.1,129.4,-47.91,56.0,-47.6,73.0,-47.66
2018-06-07 07:00:00,140.3,-47.97,115.7,-47.86,52.0,-47.59,58.3,-47.63
2018-06-07 08:00:00,135.8,-47.96,129.6,-47.94,53.3,-47.6,62.3,-47.67
2018-06-07 09:00:00,129.9,-47.94,117.0,-47.91,50.5,-47.59,60.4,-47.7
2018-06-07 10:00:00,109.0,-47.86,111.5,-47.89,49.5,-47.6,49.4,-47.7
2018-06-07 11:00:00,101.2,-47.84,117.1,-47.91,54.3,-47.62,45.7,-47.73
2018-06-07 12:00:00,103.5,-47.84,122.7,-47.95,59.4,-47.64,51.9,-47.76
2018-06-07 13:00:00,113.2,-47.89,136.7,-48.0,68.9,-47.67,61.4,-47.8
2018-06-07 14:00:00,123.8,-47.93,151.8,-48.06,77.7,-47.7,68.8,-47.85
2018-06-07 15:00:00,130.7,-47.96,157.8,-48.1,82.0,-47.72,71.2,-47.86
2018-06-07 16:00:00,125.6,-47.94,131.3,-47.98,77.7,-47.7,64.4,-47.83
2018-06-07 17:00:00,121.6,-47.92,123.6,-47.95,74.0,-47.69,59.7,-47.81
2018-06-07 18:00:00,139.6,-48.0,185.4,-48.2,79.2,-47.7,74.0,-47.85
2018-06-07 19:00:00,170.2,-48.11,266.6,-48.51,83.0,-47.69,100.3,-47.93
2018-06-07 20:00:00,172.2,-48.12,289.5,-48.58,80.2,-47.68,111.0,-47.93
2018-06-07 21:00:00,170.4,-48.11,289.8,-48.58,78.5,-47.68,111.3,-47.92
2018-06-07 22:00:00,151.7,-48.04,245.2,-48.41,72.9,-47.66,100.5,-47.9
2018-06-07 23:00:00,140.9,-48.0,221.4,-48.33,70.0,-47.66,87.1,-47.86
2018-06-08 00:00:00,147.5,-48.04,230.6,-48.36,73.5,-47.68,93.5,-47.89
2018-06-08 01:00:00,159.5,-48.08,233.1,-48.39,78.7,-47.69,84.3,-47.83
2018-06-08 02:00:00,162.8,-48.09,182.0,-48.18,74.3,-47.68,69.8,-47.74
2018-06-08 03:00:00,160.4,-48.07,139.3,-48.0,69.1,-47.66,67.9,-47.74
2018-06-08 04:00:00,140.5,-47.99,121.1,-47.91,60.3,-47.62,61.5,-47.69
2018-06-08 05:00:00,114.8,-47.9,119.5,-47.93,50.8,-47.59,51.5,-47.68
2018-06-08 06:00:00,104.7,-47.85,105.2,-47.87,44.1,-47.57,46.8,-47.65
2018-06-08 07:00:00,92.8,-47.79,95.4,-47.82,39.7,-47.56,45.9,-47.66
2018-06-08 08:00:00,89.1,-47.78,88.3,-47.79,38.5,-47.56,42.2,-47.65
2018-06-08 09:00:00,89.1,-47.77,66.1,-47.68,39.0,-47.56,41.7,-47.65
2018-06-08 10:00:00,84.3,-47.76,63.3,-47.66,39.3,-47.56,41.0,-47.65
2018-06-08 11:00:00,79.6,-47.74,64.6,-47.66,40.5,-47.56,40.0,-47.64
2018-06-08 12:00:00,79.3,-47.74,61.2,-47.66,43.1,-47.58,40.1,-47.66
2018-06-08 13:00:00,78.6,-47.74,60.2,-47.67,46.0,-47.59,40.2,-47.71
2018-06-08 14:00:00,80.9,-47.76,64.8,-47.68,51.9,-47.62,43.6,-47.71
2018-06-08 15:00:00,79.3,-47.74,60.3,-47.67,50.1,-47.62,40.6,-47.71
2018-06-08 16:00:00,77.9,-47.74,63.2,-47.68,48.6,-47.61,40.4,-47.71
2018-06-08 17:00:00,81.7,-47.75,68.3,-47.7,49.4,-47.61,41.5,-47.72
2018-06-08 18:00:00,82.6,-47.74,74.7,-47.71,46.9,-47.59,43.0,-47.68
2018-06-08 19:00:00,85.9,-47.74,77.4,-47.72,46.4,-47.58,43.2,-47.67
2018-06-08 20:00:00,96.8,-47.79,114.2,-47.87,48.4,-47.57,51.2,-47.67
2018-06-08 21:00:00,143.9,-47.97,210.7,-48.25,62.9,-47.61,81.6,-47.72
2018-06-08 22:00:00,137.0,-47.96,187.3,-48.17,60.6,-47.61,70.6,-47.71
2018-06-08 23:00:00,133.2,-47.95,170.6,-48.11,60.0,-47.62,61.0,-47.69
2018-06-09 00:00:00,149.0,-48.02,178.7,-48.15,64.1,-47.63,65.6,-47.71
2018-06-09 01:00:00,147.4,-48.02,133.2,-47.96,61.1,-47.63,61.4,-47.71
2018-06-09 02:00:00,152.8,-48.03,137.0,-47.98,61.6,-47.63,65.4,-47.72
2018-06-09 03:00:00,136.4,-47.97,118.1,-47.9,58.7,-47.62,63.5,-47.69
2018-06-09 04:00:00,130.9,-47.96,88.0,-47.78,58.4,-47.63,54.0,-47.69
2018-06-09 05:00:00,119.8,-47.92,91.8,-47.8,57.2,-47.63,51.2,-47.68
2018-06-09 06:00:00,110.5,-47.88,107.1,-47.88,55.8,-47.63,53.0,-47.73
2018-06-09 07:00:00,109.3,-47.88,106.5,-47.87,55.3,-47.63,50.3,-47.73
2018-06-09 08:00:00,109.5,-47.88,103.7,-47.87,57.6,-47.64,47.3,-47.74
2018-06-09 09:00:00,109.2,-47.88,106.8,-47.89,60.6,-47.66,48.2,-47.75
2018-06-09 10:00:00,112.7,-47.89,116.1,-47.92,63.8,-47.67,50.6,-47.75
2018-06-09 11:00:00,116.1,-47.91,129.9,-47.98,66.5,-47.67,52.6,-47.77
2018-06-09 12:00:00,125.8,-47.95,158.7,-48.1,73.5,-47.7,60.5,-47.79
2018-06-09 13:00:00,137.5,-47.99,170.6,-48.15,78.7,-47.71,71.8,-47.84
2018-06-09 14:00:00,144.7,-48.02,179.1,-48.18,81.5,-47.71,76.5,-47.85
2018-06-09 15:00:00,140.7,-48.01,173.4,-48.16,81.9,-47.72,75.0,-47.85
2018-06-09 16:00:00,137.8,-48.0,157.1,-48.1,81.6,-47.72,74.3,-47.87
2018-06-09 17:00:00,140.4,-48.0,165.7,-48.12,82.6,-47.72,77.3,-47.87
2018-06-09 18:00:00,151.3,-48.04,213.1,-48.32,84.7,-47.72,84.4,-47.9
2018-06-09 19:00:00,161.4,-48.07,232.4,-48.37,83.9,-47.7,98.4,-47.93
2018-06-09 20:00:00,173.2,-48.1,270.9,-48.5,83.4,-47.69,114.7,-47.93
2018-06-09 21:00:00,154.6,-48.03,235.6,-48.36,75.9,-47.67,100.8,-47.9
2018-06-09 22:00:00,138.9,-47.98,217.7,-48.31,72.4,-47.67,76.8,-47.84
2018-06-09 23:00:00,146.1,-48.01,230.7,-48.36,73.5,-47.67,76.5,-47.82
2018-06-10 00:00:00,159.5,-48.07,247.2,-48.42,80.4,-47.69,83.6,-47.8
2018-06-10 01:00:00,164.0,-48.08,178.9,-48.15,78.9,-47.69,73.1,-47.71
2018-06-10 02:00:00,186.2,-48.16,230.6,-48.36,84.3,-47.71,79.2,-47.74
2018-06-10 03:00:00,189.2,-48.17,185.0,-48.18,82.4,-47.71,74.1,-47.75
2018-06-10 04:00:00,188.3,-48.17,149.7,-48.03,77.5,-47.69,77.1,-47.78
2018-06-10 05:00:00,150.8,-48.04,130.2,-47.96,75.3,-47.7,67.2,-47.77
2018-06-10 06:00:00,139.7,-48.0,126.2,-47.96,75.0,-47.71,65.0,-47.78
2018-06-10 07:00:00,137.7,-47.99,124.6,-47.95,74.1,-47.71,60.3,-47.77
2018-06-10 08:00:00,133.3,-47.98,131.5,-47.99,73.1,-47.71,54.4,-47.76
2018-06-10 09:00:00,123.1,-47.95,101.0,-47.86,70.4,-47.7,52.4,-47.78
2018-06-10 10:00:00,115.8,-47.92,90.2,-47.83,70.5,-47.71,48.1,-47.81
2018-06-10 11:00:00,112.5,-47.91,95.8,-47.86,70.7,-47.71,47.2,-47.8
2018-06-10 12:00:00,113.8,-47.91,106.5,-47.9,72.0,-47.72,46.9,-47.8
2018-06-10 13:00:00,108.8,-47.9,108.0,-47.91,71.8,-47.71,48.5,-47.81
2018-06-10 14:00:00,105.0,-47.88,98.6,-47.86,72.1,-47.71,46.5,-47.78
2018-06-10 15:00:00,104.6,-47.88,97.0,-47.86,70.5,-47.71,45.4,-47.79
2018-06-10 16:00:00,111.4,-47.9,119.0,-47.95,71.8,-47.7,58.8,-47.84
2018-06-10 17:00:00,108.7,-47.88,123.2,-47.96,69.1,-47.68,55.2,-47.81
2018-06-10 18:00:00,118.5,-47.92,143.9,-48.04,69.2,-47.68,62.3,-47.82
2018-06-10 19:00:00,117.3,-47.91,160.9,-48.1,66.4,-47.66,61.6,-47.8
2018-06-10 20:00:00,126.2,-47.94,191.2,-48.21,66.6,-47.66,60.0,-47.77
2018-06-10 21:00:00,141.5,-48.0,227.1,-48.35,69.1,-47.66,79.9,-47.83
2018-06-10 22:00:00,160.2,-48.08,255.3,-48.46,77.1,-47.68,86.2,-47.8
2018-06-10 23:00:00,152.1,-48.04,231.7,-48.37,75.2,-47.67,67.4,-47.71
2018-06-11 00:00:00,143.1,-48.02,204.6,-48.28,72.1,-47.67,49.2,-47.64
2018-06-11 01:00:00,138.6,-48.0,169.8,-48.15,68.5,-47.66,48.5,-47.67
2018-06-11 02:00:00,135.4,-47.98,156.9,-48.09,65.0,-47.65,46.9,-47.65
2018-06-11 03:00:00,151.3,-48.04,158.9,-48.09,66.3,-47.65,51.7,-47.64
2018-06-11 04:00:00,147.0,-48.03,131.2,-47.99,61.2,-47.64,48.0,-47.68
2018-06-11 05:00:00,139.7,-48.0,143.6,-48.04,59.3,-47.63,43.1,-47.65
2018-06-11 06:00:00,147.3,-48.04,174.3,-48.17,63.4,-47.64,46.0,-47.66
2018-06-11 07:00:00,107.9,-47.87,120.2,-47.94,52.5,-47.6,37.4,-47.63
2018-06-11 08:00:00,88.3,-47.77,107.5,-47.89,45.9,-47.57,31.3,-47.63
2018-06-11 09:00:00,85.2,-47.75,102.2,-47.87,44.7,-47.57,29.2,-47.63
2018-06-11 10:00:00,79.4,-47.71,86.3,-47.78,42.3,-47.56,27.4,-47.61
2018-06-11 11:00:00,69.7,-47.67,68.0,-47.7,39.2,-47.55,24.6,-47.62
2018-06-11 12:00:00,64.4,-47.63,66.4,-47.68,37.4,-47.54,26.2,-47.59
2018-06-11 13:00:00,59.3,-47.61,59.9,-47.66,35.9,-47.54,24.7,-47.61
2018-06-11 14:00:00,56.6,-47.63,56.6,-47.66,35.5,-47.55,21.7,-47.63
2018-06-11 15:00:00,53.6,-47.65,51.1,-47.66,35.4,-47.56,18.5,-47.65
2018-06-11 16:00:00,55.9,-47.67,57.3,-47.7,36.8,-47.57,20.8,-47.66
2018-06-11 17:00:00,67.0,-47.71,79.1,-47.77,41.6,-47.57,35.6,-47.69
2018-06-11 18:00:00,82.8,-47.78,110.1,-47.91,47.7,-47.59,44.0,-47.75
2018-06-11 19:00:00,97.5,-47.85,147.8,-48.08,53.0,-47.62,55.8,-47.77
2018-06-11 20:00:00,126.3,-47.97,197.8,-48.28,64.1,-47.65,68.2,-47.83
2018-06-11 21:00:00,134.2,-48.01,219.0,-48.36,67.4,-47.66,78.1,-47.89
2018-06-11 22:00:00,151.4,-48.07,260.6,-48.51,73.0,-47.67,90.4,-47.88
2018-06-11 23:00:00,189.4,-48.21,335.9,-48.77,85.0,-47.69,99.8,-47.8
2018-06-12 00:00:00,236.6,-48.38,334.2,-48.75,97.8,-47.73,93.6,-47.68
2018-06-12 01:00:00,192.1,-48.22,198.6,-48.26,78.8,-47.69,76.0,-47.78
2018-06-12 02:00:00,183.5,-48.19,222.2,-48.37,78.6,-47.7,64.3,-47.77
2018-06-12 03:00:00,168.6,-48.13,201.4,-48.29,76.4,-47.69,60.5,-47.76
2018-06-12 04:00:00,142.4,-48.03,136.1,-48.02,66.8,-47.67,55.1,-47.76
2018-06-12 05:00:00,128.5,-47.97,123.1,-47.96,63.9,-47.66,51.1,-47.73
2018-06-12 06:00:00,121.3,-47.94,104.2,-47.89,62.3,-47.66,49.3,-47.74
2018-06-12 07:00:00,113.5,-47.91,100.1,-47.87,59.9,-47.66,46.0,-47.75
2018-06-12 08:00:00,104.8,-47.87,94.0,-47.84,59.7,-47.66,44.7,-47.75
2018-06-12 09:00:00,96.3,-47.85,75.8,-47.78,57.1,-47.66,44.3,-47.78
2018-06-12 10:00:00,89.8,-47.83,74.8,-47.77,55.1,-47.65,43.5,-47.79
2018-06-12 11:00:00,85.1,-47.81,67.9,-47.74,52.4,-47.63,39.8,-47.77
2018-06-12 12:00:00,78.1,-47.78,57.0,-47.7,47.2,-47.62,34.4,-47.74
2018-06-12 13:00:00,74.5,-47.76,51.9,-47.67,44.1,-47.59,32.1,-47.7
2018-06-12 14:00:00,68.7,-47.74,41.8,-47.64,41.8,-47.59,26.8,-47.7
2018-06-12 15:00:00,59.4,-47.7,30.8,-47.58,36.7,-47.57,20.2,-47.66
2018-06-12 16:00:00,56.5,-47.7,26.1,-47.57,34.7,-47.57,15.4,-47.67
2018-06-12 17:00:00,57.4,-47.71,23.9,-47.56,34.8,-47.57,13.3,-47.67
2018-06-12 18:00:00,60.1,-47.72,24.1,-47.55,33.7,-47.57,13.6,-47.66
2018-06-12 19:00:00,70.9,-47.76,33.9,-47.59,34.9,-47.57,18.0,-47.63
2018-06-12 20:00:00,86.7,-47.82,58.1,-47.68,37.5,-47.57,26.6,-47.6
2018-06-12 21:00:00,107.5,-47.9,91.0,-47.81,42.2,-47.57,36.2,-47.58
2018-06-12 22:00:00,137.2,-48.01,156.7,-48.09,49.9,-47.58,52.1,-47.59
2018-06-12 23:00:00,195.7,-48.23,209.2,-48.26,66.0,-47.62,68.0,-47.58
2018-06-13 00:00:00,294.9,-48.56,178.9,-48.04,90.9,-47.66,98.3,-47.43
2018-06-13 01:00:00,337.9,-48.68,128.7,-47.74,104.2,-47.66,108.3,-47.32
2018-06-13 02:00:00,341.2,-48.68,130.8,-47.72,111.4,-47.65,112.6,-47.25
2018-06-13 03:00:00,299.6,-48.55,116.4,-47.69,102.4,-47.64,97.5,-47.29
2018-06-13 04:00:00,280.8,-48.49,108.9,-47.66,100.6,-47.62,95.0,-47.27
2018-06-13 05:00:00,303.7,-48.55,124.6,-47.68,111.6,-47.61,106.1,-47.22
2018-06-13 06:00:00,271.8,-48.41,130.7,-47.68,113.1,-47.51,112.5,-47.24
2018-06-13 07:00:00,232.0,-48.28,119.8,-47.68,105.9,-47.46,100.4,-47.38
2018-06-13 08:00:00,183.4,-48.12,100.2,-47.68,90.3,-47.46,79.1,-47.49
2018-06-13 09:00:00,117.9,-47.92,70.9,-47.66,63.1,-47.53,50.7,-47.63
2018-06-13 10:00:00,80.8,-47.78,53.5,-47.63,50.1,-47.54,37.1,-47.69
2018-06-13 11:00:00,65.7,-47.74,46.6,-47.64,46.2,-47.56,26.6,-47.73
2018-06-13 12:00:00,57.8,-47.71,42.4,-47.64,44.2,-47.58,24.0,-47.73
2018-06-13 13:00:00,59.7,-47.73,40.6,-47.64,45.6,-47.59,23.2,-47.74
2018-06-13 14:00:00,65.1,-47.75,43.7,-47.65,45.7,-47.59,25.8,-47.73
2018-06-13 15:00:00,65.9,-47.75,47.1,-47.66,44.6,-47.59,27.0,-47.72
2018-06-13 16:00:00,62.8,-47.74,41.6,-47.64,44.0,-47.59,24.1,-47.74
2018-06-13 17:00:00,72.6,-47.77,47.8,-47.66,52.5,-47.62,32.3,-47.76
2018-06-13 18:00:00,91.1,-47.85,61.1,-47.71,62.2,-47.64,39.5,-47.77
2018-06-13 19:00:00,107.0,-47.9,68.0,-47.72,67.2,-47.63,43.6,-47.74
2018-06-13 20:00:00,121.8,-47.96,83.0,-47.78,73.0,-47.64,46.7,-47.74
2018-06-13 21:00:00,128.5,-48.0,91.3,-47.82,79.2,-47.67,50.8,-47.76
2018-06-13 22:00:00,127.9,-48.0,89.5,-47.82,81.1,-47.69,53.5,-47.79
2018-06-13 23:00:00,124.1,-47.99,86.8,-47.82,78.9,-47.68,54.2,-47.81
2018-06-14 00:00:00,113.6,-47.96,80.7,-47.81,75.1,-47.68,51.6,-47.83
2018-06-14 01:00:00,89.7,-47.87,61.9,-47.74,57.0,-47.63,40.8,-47.8
2018-06-14 02:00:00,83.6,-47.84,52.6,-47.68,47.3,-47.58,30.8,-47.74
2018-06-14 03:00:00,72.3,-47.79,46.9,-47.66,41.5,-47.56,26.1,-47.73
2018-06-14 04:00:00,58.3,-47.73,38.2,-47.62,34.6,-47.55,20.9,-47.74
2018-06-14 05:00:00,51.6,-47.71,33.4,-47.61,31.4,-47.55,17.0,-47.75
2018-06-14 06:00:00,46.6,-47.68,28.8,-47.59,29.5,-47.55,14.4,-47.74
2018-06-14 07:00:00,50.6,-47.7,30.6,-47.6,32.1,-47.56,16.3,-47.75
2018-06-14 08:00:00,50.8,-47.71,30.5,-47.61,33.8,-47.58,17.0,-47.77
2018-06-14 09:00:00,46.9,-47.69,26.4,-47.58,31.8,-47.57,14.7,-47.75
2018-06-14 10:00:00,47.8,-47.7,27.6,-47.59,33.8,-47.58,15.4,-47.78
2018-06-14 11:00:00,48.9,-47.7,32.4,-47.62,38.2,-47.61,20.1,-47.81
2018-06-14 12:00:00,46.0,-47.72,39.0,-47.68,41.4,-47.66,27.0,-47.98
2018-06-14 13:00:00,32.5,-47.65,28.0,-47.62,27.9,-47.6,16.7,-47.88
2018-06-14 14:00:00,35.3,-47.66,33.9,-47.65,30.1,-47.61,21.9,-47.91
2018-06-14 15:00:00,36.3,-47.67,34.8,-47.67,29.1,-47.62,20.4,-47.91
2018-06-14 16:00:00,36.2,-47.67,34.2,-47.66,27.9,-47.61,21.6,-47.89
2018-06-14 17:00:00,39.0,-47.68,33.8,-47.66,28.8,-47.61,22.8,-47.89
2018-06-14 18:00:00,40.4,-47.68,31.2,-47.64,28.0,-47.6,22.6,-47.85
2018-06-14 19:00:00,45.0,-47.7,31.8,-47.64,29.1,-47.6,25.2,-47.84
2018-06-14 20:00:00,62.2,-47.77,39.9,-47.66,34.1,-47.61,30.9,-47.82
2018-06-14 21:00:00,82.5,-47.85,51.4,-47.68,40.8,-47.61,40.9,-47.76
2018-06-14 22:00:00,97.8,-47.92,64.5,-47.75,56.0,-47.64,58.2,-47.89
2018-06-14 23:00:00,105.4,-47.96,68.0,-47.77,61.6,-47.67,61.9,-47.92
2018-06-15 00:00:00,127.0,-48.04,78.7,-47.79,70.9,-47.68,74.1,-47.91
2018-06-15 01:00:00,140.3,-48.09,88.8,-47.81,74.9,-47.68,80.5,-47.88
2018-06-15 02:00:00,154.3,-48.15,95.2,-47.83,81.1,-47.69,86.2,-47.88
2018-06-15 03:00:00,169.3,-48.2,107.9,-47.88,89.7,-47.71,105.3,-47.94
2018-06-15 04:00:00,184.3,-48.26,121.9,-47.94,90.8,-47.73,108.0,-47.92
2018-06-15 05:00:00,205.5,-48.34,139.5,-48.01,95.1,-47.75,110.7,-47.9
2018-06-15 06:00:00,248.2,-48.5,219.7,-48.32,103.5,-47.79,112.7,-47.89
2018-06-15 07:00:00,195.4,-48.31,247.1,-48.49,80.5,-47.76,85.3,-47.93
2018-06-15 08:00:00,126.1,-48.05,146.3,-48.12,57.8,-47.7,55.2,-47.91
2018-06-15 09:00:00,79.0,-47.86,76.2,-47.83,44.6,-47.64,40.9,-47.92
2018-06-15 10:00:00,68.8,-47.81,67.4,-47.8,45.6,-47.63,40.2,-47.94
2018-06-15 11:00:00,57.9,-47.77,61.1,-47.78,44.9,-47.64,40.6,-47.97
2018-06-15 12:00:00,44.8,-47.72,46.4,-47.72,38.4,-47.65,32.0,-47.98
2018-06-15 13:00:00,37.5,-47.69,37.4,-47.68,35.9,-47.65,23.0,-47.95
2018-06-15 14:00:00,37.3,-47.69,36.2,-47.68,37.0,-47.66,21.3,-47.98
2018-06-15 15:00:00,37.1,-47.69,33.4,-47.67,35.5,-47.66,19.2,-47.98
2018-06-15 16:00:00,37.9,-47.7,34.4,-47.68,35.8,-47.66,22.0,-47.99
2018-06-15 17:00:00,43.0,-47.72,38.2,-47.7,39.4,-47.67,29.2,-48.03
2018-06-15 18:00:00,47.7,-47.74,37.1,-47.68,36.5,-47.66,25.4,-48.0
2018-06-15 19:00:00,52.1,-47.76,36.4,-47.68,35.5,-47.65,25.4,-47.98
2018-06-15 20:00:00,60.8,-47.8,40.0,-47.68,39.9,-47.65,29.2,-47.98
2018-06-15 21:00:00,73.0,-47.84,48.9,-47.69,45.5,-47.64,35.2,-47.95
2018-06-15 22:00:00,79.6,-47.86,59.3,-47.73,50.4,-47.64,43.3,-47.96
2018-06-15 23:00:00,90.1,-47.9,78.0,-47.81,61.8,-47.67,63.4,-48.07
2018-06-16 00:00:00,93.1,-47.92,81.1,-47.83,64.9,-47.69,62.5,-48.07
2018-06-16 01:00:00,118.5,-48.0,104.2,-47.89,85.2,-47.7,89.5,-48.09
2018-06-16 02:00:00,122.5,-48.02,122.1,-47.97,93.6,-47.71,112.6,-48.18
2018-06-16 03:00:00,108.5,-47.97,96.3,-47.87,77.8,-47.7,80.1,-48.06
2018-06-16 04:00:00,115.6,-47.99,93.9,-47.84,80.7,-47.68,66.4,-48.02
2018-06-16 05:00:00,132.6,-48.04,108.5,-47.88,100.1,-47.66,72.6,-48.01
2018-06-16 06:00:00,143.8,-48.11,111.8,-47.91,116.2,-47.73,76.7,-48.05
2018-06-16 07:00:00,114.7,-48.02,91.5,-47.89,95.1,-47.76,60.8,-48.09
2018-06-16 08:00:00,78.6,-47.89,64.7,-47.81,78.9,-47.78,44.9,-48.09
2018-06-16 09:00:00,59.9,-47.81,50.5,-47.76,51.6,-47.72,34.7,-48.05
2018-06-16 10:00:00,43.0,-47.71,37.9,-47.68,34.4,-47.64,23.4,-47.94
2018-06-16 11:00:00,35.2,-47.67,25.5,-47.61,25.8,-47.59,11.3,-47.87
2018-06-16 12:00:00,32.4,-47.66,22.8,-47.6,23.6,-47.59,9.1,-47.88
2018-06-16 13:00:00,35.7,-47.68,25.0,-47.63,26.9,-47.61,10.5,-47.93
2018-06-16 14:00:00,38.1,-47.7,28.1,-47.65,29.3,-47.63,13.0,-47.97
2018-06-16 15:00:00,41.1,-47.72,29.6,-47.66,30.4,-47.63,13.8,-47.97
2018-06-16 16:00:00,46.1,-47.73,33.1,-47.67,32.9,-47.63,16.7,-47.95
2018-06-16 17:00:00,49.0,-47.75,33.9,-47.67,34.3,-47.63,17.7,-47.95
2018-06-16 18:00:00,54.0,-47.76,36.8,-47.67,37.9,-47.63,18.9,-47.94
2018-06-16 19:00:00,54.2,-47.78,47.4,-47.74,47.4,-47.69,29.8,-48.09
2018-06-16 20:00:00,49.6,-47.76,43.7,-47.72,41.3,-47.67,32.7,-48.1
2018-06-16 21:00:00,55.8,-47.77,47.8,-47.72,45.0,-47.65,37.2,-48.06
2018-06-16 22:00:00,61.0,-47.78,53.7,-47.72,48.4,-47.64,44.7,-48.02
2018-06-16 23:00:00,63.4,-47.79,54.9,-47.73,49.6,-47.65,52.7,-48.05
2018-06-17 00:00:00,71.0,-47.83,58.1,-47.75,60.1,-47.68,42.2,-48.01
2018-06-17 01:00:00,77.6,-47.86,62.5,-47.78,72.3,-47.73,40.9,-48.01
2018-06-17 02:00:00,83.7,-47.89,67.4,-47.8,79.5,-47.76,46.7,-48.01
2018-06-17 03:00:00,96.0,-47.95,74.2,-47.83,86.1,-47.78,53.0,-48.03
2018-06-17 04:00:00,106.2,-47.97,70.4,-47.78,85.9,-47.73,59.9,-47.99
2018-06-17 05:00:00,108.0,-47.97,73.1,-47.79,83.4,-47.7,64.0,-47.99
2018-06-17 06:00:00,79.9,-47.85,66.8,-47.79,68.3,-47.7,51.4,-47.94
2018-06-17 07:00:00,73.4,-47.83,61.9,-47.77,68.5,-47.72,47.2,-47.95
2018-06-17 08:00:00,61.1,-47.78,50.2,-47.74,57.8,-47.71,41.7,-47.94
2018-06-17 09:00:00,45.7,-47.71,40.3,-47.69,45.1,-47.67,30.9,-47.87
2018-06-17 10:00:00,40.6,-47.69,35.2,-47.67,39.8,-47.65,24.1,-47.87
2018-06-17 11:00:00,37.1,-47.68,33.1,-47.66,34.7,-47.64,22.6,-47.89
2018-06-17 12:00:00,36.5,-47.67,32.3,-47.66,31.8,-47.62,20.4,-47.9
2018-06-17 13:00:00,43.0,-47.7,30.3,-47.63,30.6,-47.6,14.7,-47.87
2018-06-17 14:00:00,40.1,-47.69,25.3,-47.61,26.7,-47.59,10.3,-47.87
2018-06-17 15:00:00,39.8,-47.69,25.0,-47.61,26.9,-47.59,10.0,-47.89
2018-06-17 16:00:00,43.6,-47.71,27.7,-47.63,29.5,-47.6,11.5,-47.92
2018-06-17 17:00:00,47.6,-47.73,29.3,-47.63,31.2,-47.6,12.6,-47.92
2018-06-17 18:00:00,52.7,-47.75,32.1,-47.64,33.7,-47.61,14.3,-47.92
2018-06-17 19:00:00,58.0,-47.77,35.4,-47.65,36.6,-47.61,17.4,-47.91
2018-06-17 20:00:00,62.6,-47.79,38.0,-47.65,38.3,-47.6,20.1,-47.88
2018-06-17 21:00:00,69.1,-47.8,41.2,-47.65,40.5,-47.59,22.7,-47.83
2018-06-17 22:00:00,78.2,-47.83,46.4,-47.66,44.9,-47.58,25.7,-47.8
2018-06-17 23:00:00,86.2,-47.86,49.6,-47.66,48.2,-47.57,29.4,-47.76
2018-06-18 00:00:00,91.9,-47.88,52.7,-47.66,52.0,-47.57,31.3,-47.75
2018-06-18 01:00:00,93.8,-47.87,54.1,-47.66,56.4,-47.57,37.5,-47.73
2018-06-18 02:00:00,99.5,-47.9,59.6,-47.69,63.7,-47.6,42.9,-47.77
2018-06-18 03:00:00,94.0,-47.93,76.3,-47.83,81.3,-47.76,59.2,-48.05
2018-06-18 04:00:00,106.3,-48.08,102.2,-48.04,89.3,-47.89,75.5,-48.66
2018-06-18 05:00:00,110.7,-48.1,102.2,-48.04,93.5,-47.9,76.4,-48.69
2018-06-18 06:00:00,100.0,-48.07,89.8,-48.01,90.2,-47.92,61.4,-48.66
2018-06-18 07:00:00,76.3,-47.95,69.2,-47.9,68.3,-47.84,46.0,-48.51
2018-06-18 08:00:00,64.3,-47.88,59.9,-47.85,57.7,-47.8,38.6,-48.42
2018-06-18 09:00:00,58.3,-47.84,56.5,-47.83,52.8,-47.77,39.1,-48.34
2018-06-18 10:00:00,52.7,-47.8,50.8,-47.79,48.9,-47.74,32.5,-48.22
2018-06-18 11:00:00,48.3,-47.78,46.8,-47.77,45.7,-47.72,29.0,-48.17
2018-06-18 12:00:00,42.1,-47.72,41.3,-47.72,40.4,-47.68,24.4,-48.03
2018-06-18 13:00:00,36.6,-47.68,37.0,-47.69,35.5,-47.65,23.3,-47.95
2018-06-18 14:00:00,34.3,-47.68,32.1,-47.67,31.6,-47.64,24.3,-47.98
2018-06-18 15:00:00,37.6,-47.71,33.6,-47.68,33.5,-47.66,23.6,-48.05
2018-06-18 16:00:00,37.5,-47.69,32.4,-47.67,33.2,-47.64,23.6,-47.99
2018-06-18 17:00:00,47.2,-47.74,37.5,-47.69,42.1,-47.67,24.8,-48.01
2018-06-18 18:00:00,69.4,-47.87,50.5,-47.77,57.6,-47.75,31.5,-48.18
2018-06-18 19:00:00,80.5,-47.92,60.5,-47.82,65.5,-47.78,36.6,-48.25
2018-06-18 20:00:00,81.0,-47.9,62.2,-47.81,65.4,-47.76,36.5,-48.18
2018-06-18 21:00:00,86.9,-47.91,62.3,-47.78,66.6,-47.72,39.2,-48.07
2018-06-18 22:00:00,81.9,-47.87,62.3,-47.77,66.5,-47.71,41.4,-48.0
2018-06-18 23:00:00,69.0,-47.81,57.2,-47.75,62.0,-47.71,39.5,-47.93
2018-06-19 00:00:00,60.9,-47.78,52.3,-47.75,60.3,-47.73,41.6,-47.95
2018-06-19 01:00:00,59.1,-47.78,53.3,-47.76,54.4,-47.7,54.3,-48.03
2018-06-19 02:00:00,53.9,-47.75,45.8,-47.7,42.5,-47.63,42.5,-47.94
2018-06-19 03:00:00,54.4,-47.74,45.7,-47.69,41.0,-47.61,39.9,-47.89
2018-06-19 04:00:00,55.6,-47.74,47.3,-47.69,42.7,-47.62,39.2,-47.89
2018-06-19 05:00:00,55.5,-47.74,48.5,-47.7,42.6,-47.62,38.0,-47.87
2018-06-19 06:00:00,52.4,-47.73,47.1,-47.69,40.6,-47.61,34.4,-47.86
2018-06-19 07:00:00,48.6,-47.72,43.3,-47.68,38.6,-47.61,31.4,-47.88
2018-06-19 08:00:00,45.7,-47.7,41.0,-47.67,37.1,-47.61,33.1,-47.87
2018-06-19 09:00:00,42.7,-47.69,36.8,-47.65,35.3,-47.6,29.1,-47.84
2018-06-19 10:00:00,39.9,-47.68,33.5,-47.64,34.7,-47.6,30.1,-47.84
2018-06-19 11:00:00,39.1,-47.68,32.5,-47.64,35.1,-47.61,28.0,-47.85
2018-06-19 12:00:00,38.4,-47.67,31.4,-47.63,34.9,-47.61,24.5,-47.83
2018-06-19 13:00:00,39.2,-47.68,32.0,-47.64,35.9,-47.61,26.1,-47.84
2018-06-19 14:00:00,38.6,-47.67,31.5,-47.64,37.0,-47.62,23.9,-47.81
2018-06-19 15:00:00,41.4,-47.69,32.8,-47.64,39.2,-47.64,27.3,-47.82
2018-06-19 16:00:00,47.9,-47.72,39.2,-47.67,44.5,-47.66,31.2,-47.83
2018-06-19 17:00:00,56.0,-47.75,43.0,-47.68,47.4,-47.66,34.7,-47.83
2018-06-19 18:00:00,60.4,-47.77,40.8,-47.67,44.3,-47.63,30.6,-47.81
2018-06-19 19:00:00,63.4,-47.77,39.3,-47.64,43.3,-47.6,28.2,-47.76
2018-06-19 20:00:00,72.5,-47.8,42.8,-47.64,47.3,-47.59,30.5,-47.74
2018-06-19 21:00:00,87.4,-47.84,52.4,-47.64,54.9,-47.57,38.9,-47.69
2018-06-19 22:00:00,107.3,-47.92,63.4,-47.67,64.8,-47.56,45.6,-47.7
2018-06-19 23:00:00,127.5,-47.99,77.8,-47.71,76.3,-47.55,54.0,-47.68
2018-06-20 00:00:00,136.1,-48.03,84.1,-47.74,80.3,-47.56,57.5,-47.69
2018-06-20 01:00:00,145.1,-48.08,93.7,-47.79,82.5,-47.57,57.8,-47.71
2018-06-20 02:00:00,132.8,-48.04,89.1,-47.8,74.0,-47.57,51.4,-47.72
2018-06-20 03:00:00,126.7,-48.02,86.9,-47.8,70.5,-47.57,47.9,-47.74
2018-06-20 04:00:00,109.7,-47.94,72.0,-47.74,61.6,-47.56,43.0,-47.7
2018-06-20 05:00:00,99.9,-47.91,63.1,-47.71,57.3,-47.57,41.0,-47.73
2018-06-20 06:00:00,84.7,-47.84,56.4,-47.68,49.8,-47.56,34.8,-47.72
2018-06-20 07:00:00,73.0,-47.8,51.0,-47.67,43.9,-47.56,29.8,-47.72
2018-06-20 08:00:00,65.1,-47.77,46.2,-47.66,39.5,-47.56,27.6,-47.72
2018-06-20 09:00:00,60.6,-47.74,43.1,-47.64,35.7,-47.54,24.7,-47.68
2018-06-20 10:00:00,51.4,-47.7,42.7,-47.64,34.6,-47.54,26.0,-47.69
2018-06-20 11:00:00,38.9,-47.65,41.5,-47.66,34.3,-47.58,25.5,-47.71
2018-06-20 12:00:00,38.2,-47.66,40.4,-47.67,35.2,-47.6,28.9,-47.77
2018-06-20 13:00:00,31.4,-47.62,30.9,-47.62,30.0,-47.58,23.3,-47.73
2018-06-20 14:00:00,28.6,-47.61,27.9,-47.61,27.9,-47.58,21.5,-47.73
2018-06-20 15:00:00,30.1,-47.62,29.1,-47.62,29.1,-47.59,24.4,-47.75
2018-06-20 16:00:00,31.8,-47.63,30.7,-47.63,32.1,-47.61,27.4,-47.76
2018-06-20 17:00:00,39.3,-47.68,39.4,-47.68,38.8,-47.64,41.2,-47.85
2018-06-20 18:00:00,47.8,-47.71,43.8,-47.69,36.9,-47.61,36.4,-47.8
2018-06-20 19:00:00,49.2,-47.71,41.3,-47.66,35.3,-47.59,32.8,-47.76
2018-06-20 20:00:00,50.5,-47.7,48.3,-47.68,37.0,-47.58,39.2,-47.78
2018-06-20 21:00:00,74.8,-47.81,59.3,-47.73,44.7,-47.62,45.2,-47.79
2018-06-20 22:00:00,71.0,-47.78,47.7,-47.68,41.4,-47.63,42.5,-47.69
2018-06-20 23:00:00,57.7,-47.71,36.3,-47.62,32.8,-47.59,36.7,-47.63
2018-06-21 00:00:00,52.1,-47.68,33.6,-47.6,28.4,-47.56,32.0,-47.61
2018-06-21 01:00:00,58.1,-47.7,34.5,-47.6,30.0,-47.57,33.9,-47.58
2018-06-21 02:00:00,75.5,-47.77,43.5,-47.62,37.1,-47.59,42.6,-47.57
2018-06-21 03:00:00,86.6,-47.81,57.4,-47.65,41.2,-47.59,49.7,-47.59
2018-06-21 04:00:00,97.5,-47.87,100.6,-47.83,44.6,-47.59,54.9,-47.63
2018-06-21 05:00:00,109.5,-47.96,123.5,-48.01,51.1,-47.64,62.3,-47.74
2018-06-21 06:00:00,99.9,-47.95,126.5,-48.05,52.4,-47.68,68.3,-47.85
2018-06-21 07:00:00,45.9,-47.68,49.9,-47.69,26.1,-47.57,35.8,-47.67
2018-06-21 08:00:00,32.1,-47.6,28.7,-47.6,19.9,-47.54,26.0,-47.61
2018-06-21 09:00:00,27.5,-47.59,25.3,-47.59,18.4,-47.54,24.3,-47.6
2018-06-21 10:00:00,28.2,-47.6,27.3,-47.61,19.7,-47.55,25.9,-47.64
2018-06-21 11:00:00,25.0,-47.58,23.3,-47.58,17.1,-47.54,20.9,-47.64
2018-06-21 12:00:00,23.7,-47.57,21.5,-47.57,15.8,-47.53,18.0,-47.62
2018-06-21 13:00:00,24.4,-47.58,24.1,-47.59,16.3,-47.53,18.5,-47.63
2018-06-21 14:00:00,24.8,-47.58,24.9,-47.59,16.2,-47.53,18.9,-47.63
2018-06-21 15:00:00,25.6,-47.58,25.7,-47.6,15.8,-47.53,19.6,-47.63
2018-06-21 16:00:00,26.3,-47.59,27.1,-47.61,16.5,-47.53,20.4,-47.63
2018-06-21 17:00:00,28.1,-47.6,27.6,-47.61,17.7,-47.54,21.6,-47.64
2018-06-21 18:00:00,32.3,-47.62,29.0,-47.61,19.2,-47.55,23.3,-47.65
2018-06-21 19:00:00,39.9,-47.65,32.6,-47.63,22.9,-47.56,26.4,-47.65
2018-06-21 20:00:00,58.8,-47.72,38.0,-47.63,29.9,-47.57,34.5,-47.6
2018-06-21 21:00:00,96.5,-47.86,46.1,-47.62,42.1,-47.59,47.6,-47.54
2018-06-21 22:00:00,102.8,-47.89,49.6,-47.64,45.3,-47.6,49.3,-47.56
2018-06-21 23:00:00,96.3,-47.86,49.6,-47.65,44.4,-47.61,45.8,-47.56
2018-06-22 00:00:00,93.7,-47.85,53.1,-47.67,44.5,-47.61,47.6,-47.56
2018-06-22 01:00:00,117.5,-47.94,68.9,-47.72,53.8,-47.64,61.8,-47.56
2018-06-22 02:00:00,130.1,-47.98,83.0,-47.75,61.0,-47.64,79.0,-47.56
2018-06-22 03:00:00,138.1,-48.0,106.8,-47.81,66.1,-47.63,91.3,-47.58
2018-06-22 04:00:00,156.1,-48.08,136.7,-47.92,72.9,-47.65,99.9,-47.61
2018-06-22 05:00:00,159.8,-48.09,151.2,-47.98,75.4,-47.66,103.1,-47.66
2018-06-22 06:00:00,129.8,-48.02,124.0,-47.95,63.1,-47.71,87.2,-47.79
2018-06-22 07:00:00,105.6,-47.93,94.9,-47.88,54.5,-47.7,69.5,-47.82
2018-06-22 08:00:00,85.8,-47.85,80.8,-47.83,47.9,-47.68,64.4,-47.84
2018-06-22 09:00:00,63.7,-47.77,62.7,-47.77,36.9,-47.64,53.1,-47.83
2018-06-22 10:00:00,50.9,-47.72,49.2,-47.72,30.8,-47.61,38.0,-47.8
2018-06-22 11:00:00,47.4,-47.7,47.5,-47.69,29.4,-47.61,34.3,-47.8
2018-06-22 12:00:00,43.8,-47.68,47.2,-47.67,26.2,-47.6,30.3,-47.79
2018-06-22 13:00:00,44.9,-47.68,48.9,-47.68,26.7,-47.6,29.4,-47.8
2018-06-22 14:00:00,46.2,-47.69,51.8,-47.69,27.2,-47.61,31.3,-47.81
2018-06-22 15:00:00,50.0,-47.7,53.5,-47.7,28.3,-47.61,32.8,-47.83
2018-06-22 16:00:00,50.8,-47.69,54.2,-47.69,27.0,-47.6,32.2,-47.81
2018-06-22 17:00:00,53.8,-47.7,51.0,-47.7,26.5,-47.6,30.1,-47.8
2018-06-22 18:00:00,53.5,-47.69,52.4,-47.7,25.5,-47.59,30.7,-47.79
2018-06-22 19:00:00,70.7,-47.77,104.6,-47.95,29.6,-47.59,41.3,-47.77
2018-06-22 20:00:00,86.8,-47.85,162.8,-48.18,32.8,-47.57,48.8,-47.75
2018-06-22 21:00:00,113.6,-47.96,191.4,-48.29,44.0,-47.59,44.4,-47.67
2018-06-22 22:00:00,116.3,-47.97,115.3,-47.96,47.9,-47.6,43.2,-47.65
2018-06-22 23:00:00,146.8,-48.09,61.6,-47.67,58.8,-47.62,52.4,-47.57
2018-06-23 00:00:00,161.5,-48.14,69.0,-47.66,67.4,-47.6,61.1,-47.53
2018-06-23 01:00:00,143.6,-48.05,94.3,-47.75,69.0,-47.51,67.3,-47.55
2018-06-23 02:00:00,181.9,-48.18,135.0,-47.88,90.8,-47.45,88.2,-47.57
2018-06-23 03:00:00,181.6,-48.16,172.2,-48.05,101.6,-47.49,98.4,-47.6
2018-06-23 04:00:00,191.8,-48.18,201.0,-48.13,139.4,-47.63,144.9,-47.73
2018-06-23 05:00:00,200.0,-48.21,213.2,-48.19,158.9,-47.7,204.8,-48.01
2018-06-23 06:00:00,160.5,-48.1,148.8,-48.02,100.8,-47.68,132.5,-47.9
2018-06-23 07:00:00,136.0,-48.02,128.6,-47.97,71.0,-47.64,97.1,-47.85
2018-06-23 08:00:00,91.5,-47.86,99.4,-47.87,45.2,-47.61,62.9,-47.74
2018-06-23 09:00:00,63.3,-47.77,73.9,-47.8,32.1,-47.59,41.0,-47.72
2018-06-23 10:00:00,53.4,-47.74,55.3,-47.75,29.1,-47.59,31.1,-47.73
2018-06-23 11:00:00,57.9,-47.76,56.9,-47.75,30.5,-47.6,29.8,-47.73
2018-06-23 12:00:00,66.0,-47.8,70.2,-47.81,35.1,-47.62,36.4,-47.76
2018-06-23 13:00:00,65.9,-47.8,75.2,-47.82,35.1,-47.62,37.8,-47.76
2018-06-23 14:00:00,60.7,-47.77,66.2,-47.78,32.8,-47.62,35.7,-47.76
2018-06-23 15:00:00,55.9,-47.75,56.2,-47.74,33.0,-47.63,34.8,-47.78
2018-06-23 16:00:00,58.0,-47.76,53.4,-47.72,35.9,-47.64,38.6,-47.78
2018-06-23 17:00:00,61.5,-47.77,54.2,-47.73,39.1,-47.65,40.5,-47.79
2018-06-23 18:00:00,62.5,-47.78,50.7,-47.72,38.8,-47.64,38.6,-47.78
2018-06-23 19:00:00,72.7,-47.81,45.9,-47.69,40.9,-47.64,38.4,-47.72
2018-06-23 20:00:00,100.8,-47.92,51.3,-47.68,48.5,-47.66,44.3,-47.69
2018-06-23 21:00:00,151.7,-48.12,88.2,-47.81,63.0,-47.69,61.8,-47.62
2018-06-23 22:00:00,237.0,-48.42,173.7,-48.12,84.3,-47.73,95.7,-47.6
2018-06-23 23:00:00,270.2,-48.53,133.4,-47.92,90.0,-47.74,105.6,-47.56
2018-06-24 00:00:00,255.0,-48.47,109.1,-47.83,89.0,-47.73,101.1,-47.58
2018-06-24 01:00:00,205.2,-48.3,102.0,-47.82,83.8,-47.73,90.0,-47.64
2018-06-24 02:00:00,236.1,-48.41,151.2,-48.01,90.8,-47.74,100.9,-47.61
2018-06-24 03:00:00,276.6,-48.55,149.3,-47.97,103.4,-47.78,121.3,-47.6
2018-06-24 04:00:00,253.1,-48.48,148.9,-48.03,96.3,-47.78,112.1,-47.76
2018-06-24 05:00:00,256.3,-48.5,184.7,-48.22,94.6,-47.79,116.0,-47.84
2018-06-24 06:00:00,243.1,-48.46,235.0,-48.44,88.7,-47.78,122.2,-47.89
2018-06-24 07:00:00,235.0,-48.42,225.1,-48.42,81.9,-47.76,121.3,-47.94
2018-06-24 08:00:00,177.2,-48.21,180.8,-48.25,64.2,-47.71,93.0,-47.89
2018-06-24 09:00:00,126.2,-48.02,130.5,-48.05,49.8,-47.68,71.4,-47.85
2018-06-24 10:00:00,96.0,-47.89,99.2,-47.92,39.2,-47.64,53.4,-47.79
2018-06-24 11:00:00,79.9,-47.83,96.2,-47.91,33.5,-47.61,47.5,-47.76
2018-06-24 12:00:00,78.4,-47.82,107.8,-47.96,33.9,-47.61,49.0,-47.76
2018-06-24 13:00:00,75.5,-47.81,102.1,-47.94,33.5,-47.61,46.4,-47.76
2018-06-24 14:00:00,67.5,-47.78,85.3,-47.87,30.3,-47.61,40.6,-47.76
2018-06-24 15:00:00,60.2,-47.75,76.9,-47.84,27.6,-47.6,36.1,-47.75
2018-06-24 16:00:00,60.0,-47.75,83.5,-47.87,27.3,-47.59,35.5,-47.74
2018-06-24 17:00:00,71.1,-47.8,111.6,-47.99,32.3,-47.61,43.8,-47.79
2018-06-24 18:00:00,83.1,-47.86,128.8,-48.07,38.1,-47.63,52.5,-47.84
2018-06-24 19:00:00,87.2,-47.87,133.6,-48.08,38.2,-47.62,44.6,-47.77
2018-06-24 20:00:00,94.0,-47.9,106.7,-47.95,41.1,-47.61,39.2,-47.72
2018-06-24 21:00:00,140.5,-48.09,94.0,-47.86,67.3,-47.66,64.0,-47.75
2018-06-24 22:00:00,169.9,-48.2,118.2,-47.93,82.1,-47.67,82.2,-47.76
2018-06-24 23:00:00,198.3,-48.29,132.0,-47.94,91.5,-47.65,89.7,-47.69
2018-06-25 00:00:00,197.3,-48.27,147.0,-47.97,97.2,-47.58,91.3,-47.64
2018-06-25 01:00:00,198.5,-48.27,151.8,-47.97,98.7,-47.55,92.6,-47.62
2018-06-25 02:00:00,224.8,-48.35,167.3,-47.99,110.9,-47.52,101.4,-47.57
2018-06-25 03:00:00,261.3,-48.47,178.1,-47.99,128.1,-47.52,115.4,-47.51
2018-06-25 04:00:00,266.3,-48.46,192.9,-48.03,144.8,-47.51,134.0,-47.51
2018-06-25 05:00:00,224.1,-48.3,207.2,-48.13,164.0,-47.63,148.5,-47.71
2018-06-25 06:00:00,195.4,-48.21,209.2,-48.19,164.6,-47.73,179.9,-47.94
2018-06-25 07:00:00,170.1,-48.14,192.9,-48.19,151.1,-47.79,201.5,-48.15
2018-06-25 08:00:00,141.9,-48.06,158.9,-48.11,120.1,-47.79,164.4,-48.12
2018-06-25 09:00:00,119.7,-47.99,117.1,-47.97,85.1,-47.74,110.4,-47.97
2018-06-25 10:00:00,104.6,-47.94,97.8,-47.91,61.3,-47.72,74.7,-47.87
2018-06-25 11:00:00,101.7,-47.93,101.4,-47.93,55.4,-47.71,68.3,-47.86
2018-06-25 12:00:00,97.2,-47.91,102.9,-47.94,52.9,-47.71,66.4,-47.84
2018-06-25 13:00:00,90.6,-47.89,91.4,-47.89,49.9,-47.7,63.9,-47.84
2018-06-25 14:00:00,86.1,-47.87,83.4,-47.86,48.3,-47.69,59.8,-47.82
2018-06-25 15:00:00,80.2,-47.84,72.6,-47.82,45.6,-47.69,55.6,-47.8
2018-06-25 16:00:00,79.3,-47.84,68.7,-47.8,45.5,-47.68,54.2,-47.8
2018-06-25 17:00:00,80.5,-47.84,80.5,-47.83,45.4,-47.67,55.5,-47.79
2018-06-25 18:00:00,97.1,-47.9,101.9,-47.91,50.9,-47.68,62.5,-47.78
2018-06-25 19:00:00,124.5,-48.02,95.0,-47.87,67.5,-47.69,66.9,-47.76
2018-06-25 20:00:00,141.0,-48.08,99.3,-47.87,73.3,-47.69,71.2,-47.72
2018-06-25 21:00:00,171.1,-48.2,111.5,-47.89,83.4,-47.71,80.8,-47.69
2018-06-25 22:00:00,206.9,-48.33,165.1,-48.11,94.6,-47.73,94.4,-47.67
2018-06-25 23:00:00,268.6,-48.55,193.5,-48.19,116.7,-47.77,110.9,-47.65
2018-06-26 00:00:00,287.7,-48.61,202.4,-48.2,122.2,-47.78,114.2,-47.61
2018-06-26 01:00:00,326.4,-48.74,265.8,-48.43,134.4,-47.81,125.8,-47.6
2018-06-26 02:00:00,453.5,-49.13,665.3,-49.72,178.4,-47.88,166.4,-47.66
2018-06-26 03:00:00,513.4,-49.3,950.2,-50.44,190.8,-47.9,224.8,-47.94
2018-06-26 04:00:00,384.8,-48.92,677.9,-49.79,137.4,-47.81,208.9,-47.99
2018-06-26 05:00:00,312.5,-48.68,520.3,-49.36,111.8,-47.76,194.4,-48.06
2018-06-26 06:00:00,280.5,-48.58,492.3,-49.29,102.6,-47.75,170.3,-48.03
2018-06-26 07:00:00,241.9,-48.45,433.4,-49.12,90.9,-47.73,141.7,-47.97
2018-06-26 08:00:00,196.5,-48.29,315.6,-48.74,77.1,-47.7,116.0,-47.92
2018-06-26 09:00:00,147.2,-48.11,221.3,-48.41,62.7,-47.67,86.8,-47.85
2018-06-26 10:00:00,117.2,-47.99,178.5,-48.24,52.4,-47.66,71.9,-47.82
2018-06-26 11:00:00,101.8,-47.93,154.7,-48.16,45.0,-47.64,60.6,-47.79
2018-06-26 12:00:00,85.6,-47.86,115.4,-48.01,38.4,-47.63,48.0,-47.77
2018-06-26 13:00:00,72.7,-47.78,92.9,-47.91,32.9,-47.62,41.3,-47.76
2018-06-26 14:00:00,67.6,-47.73,85.1,-47.85,29.7,-47.61,37.5,-47.72
2018-06-26 15:00:00,66.5,-47.69,86.3,-47.82,27.6,-47.6,40.2,-47.72
2018-06-26 16:00:00,67.4,-47.67,92.7,-47.82,26.0,-47.58,43.3,-47.69
2018-06-26 17:00:00,72.4,-47.67,105.2,-47.85,26.5,-47.58,48.1,-47.68
2018-06-26 18:00:00,77.1,-47.7,119.5,-47.93,27.9,-47.57,50.3,-47.68
2018-06-26 19:00:00,81.5,-47.74,134.9,-48.0,29.8,-47.58,55.8,-47.71
2018-06-26 20:00:00,84.5,-47.77,149.3,-48.06,31.6,-47.57,60.0,-47.74
2018-06-26 21:00:00,88.9,-47.8,166.6,-48.13,33.1,-47.57,64.7,-47.72
2018-06-26 22:00:00,102.1,-47.86,193.7,-48.26,37.8,-47.58,68.2,-47.73
2018-06-26 23:00:00,117.2,-47.93,208.9,-48.31,43.8,-47.59,58.2,-47.61
2018-06-27 00:00:00,116.2,-47.94,195.8,-48.27,45.0,-47.6,48.5,-47.59
2018-06-27 01:00:00,116.1,-47.93,183.4,-48.22,44.9,-47.6,47.2,-47.58
2018-06-27 02:00:00,119.9,-47.94,179.6,-48.2,46.4,-47.6,51.0,-47.6
2018-06-27 03:00:00,117.1,-47.93,187.7,-48.23,46.5,-47.61,49.8,-47.61
2018-06-27 04:00:00,108.7,-47.89,166.6,-48.14,43.1,-47.6,48.5,-47.6
2018-06-27 05:00:00,99.5,-47.85,141.7,-48.02,38.4,-47.59,43.7,-47.59
2018-06-27 06:00:00,93.0,-47.81,128.2,-47.97,34.8,-47.59,39.3,-47.61
2018-06-27 07:00:00,81.8,-47.76,108.4,-47.89,30.3,-47.59,35.8,-47.61
2018-06-27 08:00:00,69.3,-47.72,87.7,-47.8,25.9,-47.58,30.7,-47.61
2018-06-27 09:00:00,64.1,-47.7,79.9,-47.78,24.1,-47.58,28.5,-47.61
2018-06-27 10:00:00,59.9,-47.68,76.3,-47.76,22.5,-47.57,26.1,-47.61
2018-06-27 11:00:00,53.4,-47.67,74.7,-47.77,21.3,-47.57,23.4,-47.61
2018-06-27 12:00:00,50.3,-47.67,73.4,-47.77,21.0,-47.57,22.7,-47.62
2018-06-27 13:00:00,48.5,-47.67,70.2,-47.78,20.8,-47.56,21.6,-47.64
2018-06-27 14:00:00,47.4,-47.67,67.5,-47.77,20.4,-47.56,19.6,-47.64
2018-06-27 15:00:00,47.3,-47.67,64.0,-47.76,20.2,-47.57,18.2,-47.66
2018-06-27 16:00:00,52.5,-47.69,70.1,-47.78,22.1,-47.58,21.2,-47.67
2018-06-27 17:00:00,54.7,-47.69,74.9,-47.78,22.9,-47.58,23.2,-47.66
2018-06-27 18:00:00,68.1,-47.73,101.5,-47.88,27.2,-47.59,32.6,-47.67
2018-06-27 19:00:00,93.0,-47.82,151.7,-48.07,34.9,-47.61,57.1,-47.75
2018-06-27 20:00:00,94.9,-47.82,152.4,-48.07,36.4,-47.62,49.1,-47.7
2018-06-27 21:00:00,97.3,-47.83,155.2,-48.07,37.2,-47.62,43.5,-47.65
2018-06-27 22:00:00,89.3,-47.8,131.4,-47.98,31.5,-47.61,37.9,-47.65
2018-06-27 23:00:00,93.5,-47.82,128.3,-47.97,32.3,-47.61,37.6,-47.65
2018-06-28 00:00:00,101.8,-47.87,129.8,-47.99,36.4,-47.63,40.1,-47.67
2018-06-28 01:00:00,113.7,-47.92,130.9,-48.0,41.2,-47.66,43.5,-47.7
2018-06-28 02:00:00,114.2,-47.95,126.1,-48.01,46.2,-47.69,46.6,-47.76
2018-06-28 03:00:00,113.5,-47.96,118.9,-47.99,48.3,-47.71,44.9,-47.78
2018-06-28 04:00:00,113.1,-47.97,123.2,-48.01,51.1,-47.72,47.3,-47.81
2018-06-28 05:00:00,117.3,-48.0,131.3,-48.05,55.1,-47.75,50.8,-47.86
2018-06-28 06:00:00,119.4,-48.0,123.2,-48.01,55.5,-47.75,53.1,-47.86
2018-06-28 07:00:00,117.4,-47.99,108.0,-47.93,55.6,-47.76,57.4,-47.89
2018-06-28 08:00:00,111.7,-47.96,106.8,-47.92,55.3,-47.76,61.1,-47.92
2018-06-28 09:00:00,106.3,-47.94,102.1,-47.92,53.6,-47.76,59.2,-47.95
2018-06-28 10:00:00,99.7,-47.92,92.9,-47.89,52.2,-47.75,56.5,-47.95
2018-06-28 11:00:00,89.5,-47.9,82.7,-47.87,52.6,-47.76,50.2,-47.98
2018-06-28 12:00:00,68.9,-47.83,69.7,-47.83,47.2,-47.73,38.1,-47.96
2018-06-28 13:00:00,58.2,-47.79,63.9,-47.82,43.7,-47.72,33.4,-47.95
2018-06-28 14:00:00,54.9,-47.78,61.9,-47.81,42.1,-47.71,30.9,-47.94
2018-06-28 15:00:00,48.7,-47.74,58.0,-47.79,35.8,-47.67,26.6,-47.89
2018-06-28 16:00:00,50.9,-47.75,60.0,-47.8,36.4,-47.68,26.7,-47.89
2018-06-28 17:00:00,55.7,-47.78,71.2,-47.85,37.7,-47.68,28.3,-47.91
2018-06-28 18:00:00,64.6,-47.82,88.0,-47.91,41.3,-47.7,32.4,-47.94
2018-06-28 19:00:00,79.1,-47.87,110.2,-48.0,44.8,-47.71,38.1,-47.94
2018-06-28 20:00:00,101.3,-47.95,155.8,-48.18,50.2,-47.72,45.7,-47.91
2018-06-28 21:00:00,119.2,-48.01,185.7,-48.29,54.7,-47.72,51.8,-47.9
2018-06-28 22:00:00,137.4,-48.07,192.5,-48.3,59.0,-47.74,58.7,-47.89
2018-06-28 23:00:00,140.0,-48.07,174.6,-48.21,58.7,-47.74,60.1,-47.89
2018-06-29 00:00:00,138.8,-48.04,144.8,-48.05,54.4,-47.72,64.1,-47.86
2018-06-29 01:00:00,148.9,-48.05,148.0,-48.03,56.6,-47.72,74.2,-47.85
2018-06-29 02:00:00,154.1,-48.07,155.6,-48.06,58.9,-47.72,73.7,-47.81
2018-06-29 03:00:00,146.5,-48.06,141.2,-48.03,57.4,-47.71,66.8,-47.81
2018-06-29 04:00:00,136.1,-48.03,133.3,-48.02,52.8,-47.69,60.1,-47.81
2018-06-29 05:00:00,130.1,-48.01,137.7,-48.04,48.9,-47.67,61.0,-47.81
2018-06-29 06:00:00,121.9,-47.97,129.8,-48.01,45.3,-47.66,58.3,-47.81
2018-06-29 07:00:00,106.3,-47.9,109.6,-47.91,40.2,-47.64,52.4,-47.79
2018-06-29 08:00:00,94.9,-47.83,97.6,-47.86,36.9,-47.63,47.5,-47.77
2018-06-29 09:00:00,86.4,-47.8,89.7,-47.8,34.0,-47.62,46.2,-47.75
2018-06-29 10:00:00,71.5,-47.73,71.2,-47.71,30.3,-47.61,37.9,-47.72
2018-06-29 11:00:00,58.0,-47.68,57.0,-47.68,28.1,-47.61,27.9,-47.74
2018-06-29 12:00:00,53.0,-47.67,56.0,-47.69,27.2,-47.61,25.7,-47.75
2018-06-29 13:00:00,51.3,-47.65,54.2,-47.67,26.2,-47.6,25.6,-47.73
2018-06-29 14:00:00,49.5,-47.63,52.8,-47.67,24.6,-47.59,25.7,-47.71
2018-06-29 15:00:00,46.9,-47.65,54.0,-47.68,24.5,-47.59,25.2,-47.71
2018-06-29 16:00:00,49.6,-47.67,60.6,-47.7,26.3,-47.6,28.1,-47.69
2018-06-29 17:00:00,63.6,-47.71,82.2,-47.79,32.5,-47.61,35.8,-47.7
2018-06-29 18:00:00,79.0,-47.78,108.1,-47.9,40.4,-47.64,45.7,-47.74
2018-06-29 19:00:00,97.6,-47.86,130.0,-47.99,48.7,-47.68,55.0,-47.76
2018-06-29 20:00:00,95.9,-47.84,109.7,-47.91,48.6,-47.71,51.7,-47.78
2018-06-29 21:00:00,88.3,-47.82,94.9,-47.85,46.4,-47.69,44.2,-47.74
2018-06-29 22:00:00,91.3,-47.84,97.4,-47.86,43.2,-47.67,37.5,-47.71
2018-06-29 23:00:00,96.0,-47.85,102.7,-47.88,40.2,-47.65,38.3,-47.7
2018-06-30 00:00:00,98.5,-47.85,96.1,-47.83,36.5,-47.64,43.6,-47.71
2018-06-30 01:00:00,91.1,-47.83,92.2,-47.81,33.2,-47.63,42.8,-47.7
2018-06-30 02:00:00,89.9,-47.83,91.3,-47.83,34.3,-47.63,39.5,-47.72
2018-06-30 03:00:00,93.6,-47.86,96.4,-47.86,39.4,-47.65,35.9,-47.73
2018-06-30 04:00:00,95.5,-47.86,95.2,-47.86,42.6,-47.66,34.7,-47.75
2018-06-30 05:00:00,99.2,-47.87,98.4,-47.88,46.8,-47.68,35.8,-47.77
2018-06-30 06:00:00,98.3,-47.89,98.6,-47.9,48.8,-47.69,36.4,-47.81
2018-06-30 07:00:00,99.2,-47.9,103.7,-47.92,52.2,-47.72,41.2,-47.86
2018-06-30 08:00:00,95.6,-47.89,106.2,-47.94,51.8,-47.73,42.6,-47.9
2018-06-30 09:00:00,91.0,-47.87,110.8,-47.96,50.5,-47.72,42.0,-47.87
2018-06-30 10:00:00,78.7,-47.84,96.3,-47.93,45.5,-47.7,34.9,-47.86
2018-06-30 11:00:00,75.4,-47.82,91.6,-47.9,46.1,-47.71,37.7,-47.9
2018-06-30 12:00:00,61.6,-47.76,76.3,-47.84,37.4,-47.67,31.8,-47.85
2018-06-30 13:00:00,65.0,-47.77,75.8,-47.83,40.2,-47.69,37.0,-47.89
2018-06-30 14:00:00,73.7,-47.81,83.8,-47.86,48.8,-47.75,45.5,-47.96
2018-06-30 15:00:00,81.0,-47.87,92.0,-47.92,57.2,-47.8,51.9,-48.04
2018-06-30 16:00:00,79.5,-47.89,90.8,-47.95,57.1,-47.8,50.5,-48.06
2018-06-30 17:00:00,74.1,-47.87,87.7,-47.95,52.3,-47.77,41.3,-48.03
2018-06-30 18:00:00,78.0,-47.9,103.4,-48.02,52.8,-47.77,42.7,-48.03
2018-06-30 19:00:00,94.3,-47.97,137.7,-48.17,59.5,-47.79,47.8,-48.04
2018-06-30 20:00:00,117.8,-48.08,185.1,-48.36,69.0,-47.83,58.9,-48.05
2018-06-30 21:00:00,147.0,-48.2,211.6,-48.47,78.4,-47.87,69.1,-48.09
2018-06-30 22:00:00,161.4,-48.25,207.4,-48.45,80.3,-47.87,70.3,-48.08
2018-06-30 23:00:00,168.3,-48.26,210.6,-48.44,79.5,-47.85,73.5,-48.04
2018-07-01 00:00:00,176.1,-48.35,208.5,-48.49,88.4,-47.97,71.9,-48.41
2018-07-01 01:00:00,181.6,-48.35,187.4,-48.38,88.0,-47.96,81.1,-48.43
2018-07-01 02:00:00,190.1,-48.35,198.5,-48.4,91.2,-47.96,93.3,-48.44
2018-07-01 03:00:00,213.2,-48.42,239.4,-48.54,100.2,-47.98,103.9,-48.44
2018-07-01 04:00:00,229.0,-48.47,264.4,-48.62,105.1,-47.98,108.8,-48.43
2018-07-01 05:00:00,248.8,-48.52,297.0,-48.72,112.7,-47.98,110.0,-48.36
2018-07-01 06:00:00,261.6,-48.56,322.5,-48.8,120.4,-47.99,118.1,-48.36
2018-07-01 07:00:00,250.2,-48.52,309.1,-48.76,122.1,-47.98,117.6,-48.35
2018-07-01 08:00:00,197.3,-48.36,242.9,-48.54,116.1,-47.97,102.6,-48.4
2018-07-01 09:00:00,156.2,-48.22,186.8,-48.36,106.8,-47.94,86.8,-48.4
2018-07-01 10:00:00,120.9,-48.07,145.3,-48.18,90.0,-47.86,73.4,-48.29
2018-07-01 11:00:00,109.7,-48.0,129.6,-48.1,87.0,-47.83,72.1,-48.25
2018-07-01 12:00:00,110.0,-47.99,127.3,-48.07,89.3,-47.83,75.4,-48.25
2018-07-01 13:00:00,118.3,-48.01,130.8,-48.07,97.7,-47.84,81.2,-48.25
2018-07-01 14:00:00,122.3,-48.02,134.9,-48.08,100.2,-47.84,81.0,-48.24
2018-07-01 15:00:00,127.1,-48.02,149.8,-48.13,102.6,-47.84,87.9,-48.24
2018-07-01 16:00:00,128.8,-48.02,153.9,-48.14,101.2,-47.83,88.0,-48.2
2018-07-01 17:00:00,134.1,-48.05,169.2,-48.2,102.6,-47.83,91.4,-48.22
2018-07-01 18:00:00,134.4,-48.05,173.7,-48.23,98.6,-47.82,80.8,-48.15
2018-07-01 19:00:00,139.0,-48.08,192.6,-48.31,92.9,-47.81,78.2,-48.11
2018-07-01 20:00:00,149.9,-48.14,217.6,-48.42,89.8,-47.81,77.8,-48.09
2018-07-01 21:00:00,141.6,-48.12,214.2,-48.43,82.3,-47.8,71.1,-48.09
2018-07-01 22:00:00,156.7,-48.18,225.2,-48.46,82.5,-47.8,73.9,-48.07
2018-07-01 23:00:00,172.1,-48.23,232.6,-48.47,84.2,-47.81,79.1,-48.07
2018-07-02 00:00:00,175.5,-48.22,242.5,-48.46,84.8,-47.82,85.3,-48.07
2018-07-02 01:00:00,186.8,-48.21,244.2,-48.37,87.0,-47.82,98.3,-48.03
2018-07-02 02:00:00,180.6,-48.18,228.8,-48.32,86.0,-47.81,95.4,-47.99
2018-07-02 03:00:00,183.6,-48.21,222.4,-48.33,90.1,-47.82,94.9,-48.03
2018-07-02 04:00:00,180.3,-48.21,202.7,-48.26,89.3,-47.81,93.4,-48.03
2018-07-02 05:00:00,197.2,-48.25,194.6,-48.21,89.3,-47.81,105.6,-48.07
2018-07-02 06:00:00,184.7,-48.2,187.1,-48.18,86.5,-47.81,103.5,-48.06
2018-07-02 07:00:00,170.5,-48.13,167.1,-48.06,84.2,-47.81,97.7,-48.0
2018-07-02 08:00:00,122.4,-47.94,111.0,-47.88,68.5,-47.77,72.9,-47.98
2018-07-02 09:00:00,73.4,-47.79,74.3,-47.81,48.6,-47.7,43.5,-47.93
2018-07-02 10:00:00,69.5,-47.77,74.4,-47.81,48.1,-47.7,44.2,-47.93
2018-07-02 11:00:00,73.5,-47.76,86.7,-47.81,52.3,-47.7,53.8,-47.91
2018-07-02 12:00:00,65.5,-47.78,82.8,-47.83,50.8,-47.69,51.9,-47.95
2018-07-02 13:00:00,61.1,-47.76,75.6,-47.81,47.6,-47.68,48.8,-47.92
2018-07-02 14:00:00,53.5,-47.74,67.9,-47.79,39.9,-47.66,39.5,-47.86
2018-07-02 15:00:00,47.6,-47.7,59.5,-47.75,32.9,-47.64,30.4,-47.8
2018-07-02 16:00:00,41.5,-47.68,53.3,-47.76,26.4,-47.62,21.9,-47.77
2018-07-02 17:00:00,47.6,-47.76,62.4,-47.85,33.6,-47.69,25.0,-47.91
2018-07-02 18:00:00,59.7,-47.85,80.1,-47.95,42.8,-47.76,31.8,-48.04
2018-07-02 19:00:00,72.5,-47.93,103.1,-48.07,50.1,-47.8,37.3,-48.12
2018-07-02 20:00:00,86.0,-47.98,125.6,-48.16,51.9,-47.81,40.9,-48.12
2018-07-02 21:00:00,98.7,-48.02,143.1,-48.21,50.6,-47.78,41.6,-48.04
2018-07-02 22:00:00,101.7,-48.02,142.3,-48.2,49.1,-47.76,39.6,-48.01
2018-07-02 23:00:00,99.5,-48.02,130.6,-48.16,49.0,-47.77,37.9,-48.04
2018-07-03 00:00:00,106.1,-48.04,127.2,-48.15,49.9,-47.78,38.5,-48.08
2018-07-03 01:00:00,115.7,-48.08,139.8,-48.21,53.4,-47.8,41.5,-48.12
2018-07-03 02:00:00,125.8,-48.12,165.0,-48.3,57.1,-47.81,46.1,-48.15
2018-07-03 03:00:00,129.7,-48.14,183.0,-48.38,60.0,-47.83,48.7,-48.19
2018-07-03 04:00:00,137.9,-48.18,202.7,-48.47,63.4,-47.84,51.7,-48.2
2018-07-03 05:00:00,149.8,-48.23,224.7,-48.55,68.0,-47.85,53.8,-48.2
2018-07-03 06:00:00,128.1,-48.14,181.0,-48.38,62.3,-47.84,47.9,-48.2
2018-07-03 07:00:00,93.0,-47.99,125.7,-48.16,52.6,-47.81,36.9,-48.17
2018-07-03 08:00:00,75.3,-47.9,100.3,-48.03,46.2,-47.79,31.0,-48.13
2018-07-03 09:00:00,60.4,-47.84,76.6,-47.93,39.3,-47.75,25.6,-48.07
2018-07-03 10:00:00,47.6,-47.78,61.2,-47.85,32.3,-47.71,22.2,-47.99
2018-07-03 11:00:00,43.1,-47.75,56.5,-47.82,28.9,-47.68,20.7,-47.94
2018-07-03 12:00:00,41.9,-47.74,55.3,-47.8,27.4,-47.67,21.7,-47.9
2018-07-03 13:00:00,43.3,-47.74,59.6,-47.82,27.2,-47.66,23.9,-47.91
2018-07-03 14:00:00,45.9,-47.75,66.1,-47.85,27.9,-47.67,26.1,-47.92
2018-07-03 15:00:00,48.3,-47.75,70.0,-47.85,28.5,-47.67,28.1,-47.93
2018-07-03 16:00:00,52.5,-47.76,75.2,-47.87,29.4,-47.67,30.2,-47.93
2018-07-03 17:00:00,57.7,-47.76,85.3,-47.88,30.1,-47.67,35.7,-47.93
2018-07-03 18:00:00,65.9,-47.8,105.3,-47.96,32.6,-47.67,42.0,-47.93
2018-07-03 19:00:00,76.2,-47.84,126.6,-48.05,36.0,-47.68,49.7,-47.94
2018-07-03 20:00:00,90.8,-47.9,155.4,-48.17,41.2,-47.69,59.0,-47.99
2018-07-03 21:00:00,105.8,-47.94,170.1,-48.21,48.0,-47.72,59.8,-47.96
2018-07-03 22:00:00,109.4,-47.95,167.6,-48.18,50.7,-47.74,62.4,-47.96
2018-07-03 23:00:00,105.8,-47.93,169.2,-48.18,48.6,-47.73,61.4,-47.95
2018-07-04 00:00:00,102.7,-47.92,169.7,-48.2,45.7,-47.71,56.9,-47.91
2018-07-04 01:00:00,102.5,-47.92,164.1,-48.19,44.8,-47.7,42.3,-47.83
2018-07-04 02:00:00,104.0,-47.93,162.0,-48.17,45.3,-47.71,42.7,-47.84
2018-07-04 03:00:00,106.9,-47.93,169.3,-48.2,45.6,-47.71,42.7,-47.83
2018-07-04 04:00:00,110.1,-47.95,169.3,-48.2,44.9,-47.7,42.0,-47.8
2018-07-04 05:00:00,104.1,-47.93,131.4,-48.05,40.5,-47.68,37.8,-47.79
2018-07-04 06:00:00,102.6,-47.93,128.3,-48.04,39.1,-47.68,38.2,-47.81
2018-07-04 07:00:00,104.8,-47.93,146.9,-48.11,40.9,-47.68,39.3,-47.81
2018-07-04 08:00:00,111.1,-47.96,173.2,-48.23,45.0,-47.7,51.3,-47.88
2018-07-04 09:00:00,102.9,-47.94,158.3,-48.17,46.0,-47.71,68.4,-48.0
2018-07-04 10:00:00,94.6,-47.91,146.4,-48.12,46.0,-47.71,60.3,-47.98
2018-07-04 11:00:00,97.2,-47.92,146.4,-48.13,49.1,-47.72,53.4,-47.95
2018-07-04 12:00:00,103.8,-47.94,139.8,-48.09,52.2,-47.72,53.7,-47.92
2018-07-04 13:00:00,105.7,-47.95,118.2,-48.0,56.2,-47.74,51.3,-47.91
2018-07-04 14:00:00,114.0,-47.98,119.2,-48.0,59.7,-47.74,52.9,-47.9
2018-07-04 15:00:00,119.3,-48.01,125.7,-48.03,64.5,-47.75,54.8,-47.92
2018-07-04 16:00:00,133.8,-48.07,131.6,-48.03,74.6,-47.76,60.5,-47.91
2018-07-04 17:00:00,115.0,-47.98,87.7,-47.83,85.3,-47.79,65.8,-47.94
2018-07-04 18:00:00,112.3,-47.97,87.3,-47.82,90.8,-47.82,66.6,-47.96
2018-07-04 19:00:00,108.1,-47.96,87.6,-47.85,92.3,-47.83,63.7,-47.98
2018-07-04 20:00:00,123.1,-48.02,93.5,-47.85,92.4,-47.81,72.7,-47.94
2018-07-04 21:00:00,182.5,-48.24,118.1,-47.88,110.5,-47.83,91.8,-47.85
2018-07-04 22:00:00,186.5,-48.26,157.2,-48.06,110.6,-47.84,101.7,-47.87
2018-07-04 23:00:00,252.5,-48.48,343.1,-48.77,123.2,-47.87,127.4,-47.98
2018-07-05 00:00:00,298.0,-48.63,368.5,-48.84,142.2,-47.9,140.9,-47.96
2018-07-05 01:00:00,249.8,-48.45,181.5,-48.09,184.5,-47.84,125.7,-47.94
2018-07-05 02:00:00,237.1,-48.44,168.0,-48.09,185.8,-47.91,113.1,-47.99
2018-07-05 03:00:00,262.0,-48.51,200.8,-48.2,208.1,-47.95,151.1,-48.06
2018-07-05 04:00:00,261.1,-48.51,223.2,-48.29,217.1,-47.98,176.9,-48.19
2018-07-05 05:00:00,236.5,-48.44,241.0,-48.4,206.4,-48.03,205.3,-48.36
2018-07-05 06:00:00,218.1,-48.4,217.3,-48.35,185.9,-48.03,204.7,-48.4
2018-07-05 07:00:00,189.6,-48.31,169.4,-48.18,146.4,-47.94,162.5,-48.29
2018-07-05 08:00:00,142.7,-48.14,105.7,-47.98,97.4,-47.87,93.5,-48.1
2018-07-05 09:00:00,115.7,-48.04,90.4,-47.93,75.2,-47.83,66.1,-48.03
2018-07-05 10:00:00,105.1,-47.99,91.8,-47.94,63.9,-47.8,58.9,-48.01
2018-07-05 11:00:00,101.8,-47.97,94.8,-47.94,60.5,-47.79,59.4,-48.0
2018-07-05 12:00:00,103.3,-47.98,102.9,-47.97,60.5,-47.79,63.3,-48.01
2018-07-05 13:00:00,105.3,-47.98,104.2,-47.96,63.8,-47.81,68.8,-48.03
2018-07-05 14:00:00,105.6,-47.98,100.7,-47.95,64.9,-47.82,66.8,-48.05
2018-07-05 15:00:00,115.0,-48.01,104.2,-47.95,69.3,-47.8,70.7,-48.01
2018-07-05 16:00:00,162.5,-48.21,124.0,-48.03,94.1,-47.83,81.7,-48.02
2018-07-05 17:00:00,149.2,-48.16,114.5,-47.99,90.5,-47.82,81.1,-48.04
2018-07-05 18:00:00,152.7,-48.17,114.0,-47.99,94.1,-47.83,79.2,-48.03
2018-07-05 19:00:00,171.3,-48.25,127.3,-48.05,104.9,-47.87,85.0,-48.03
2018-07-05 20:00:00,241.0,-48.54,191.3,-48.29,142.6,-47.96,123.0,-48.17
2018-07-05 21:00:00,286.6,-48.71,209.6,-48.33,167.3,-48.0,152.3,-48.23
2018-07-05 22:00:00,295.8,-48.74,199.8,-48.26,173.3,-47.99,152.5,-48.16
2018-07-05 23:00:00,344.9,-48.9,235.6,-48.37,199.8,-48.01,171.6,-48.22
2018-07-06 00:00:00,425.6,-49.12,284.9,-48.45,239.6,-48.04,203.6,-48.11
2018-07-06 01:00:00,585.7,-49.57,630.9,-49.53,286.0,-48.17,253.3,-48.08
2018-07-06 02:00:00,729.1,-49.91,865.0,-50.07,326.0,-48.24,306.3,-47.96
2018-07-06 03:00:00,814.7,-50.07,705.7,-49.58,321.6,-48.22,337.4,-47.76
2018-07-06 04:00:00,871.3,-50.18,801.2,-49.87,308.2,-48.25,369.6,-47.92
2018-07-06 05:00:00,754.5,-49.92,591.0,-49.37,255.6,-48.19,316.9,-48.01
2018-07-06 06:00:00,516.5,-49.33,373.5,-48.83,178.6,-48.06,213.0,-48.09
2018-07-06 07:00:00,320.3,-48.74,214.4,-48.33,122.3,-47.93,130.6,-48.06
2018-07-06 08:00:00,235.7,-48.45,161.1,-48.15,98.4,-47.89,104.8,-48.07
2018-07-06 09:00:00,165.3,-48.22,135.5,-48.1,83.7,-47.87,90.5,-48.16
2018-07-06 10:00:00,140.8,-48.17,117.8,-48.07,79.7,-47.89,82.0,-48.24
2018-07-06 11:00:00,111.3,-48.07,98.1,-48.01,72.9,-47.88,71.9,-48.21
2018-07-06 12:00:00,88.6,-47.97,78.9,-47.93,63.2,-47.83,59.5,-48.13
2018-07-06 13:00:00,77.9,-47.92,69.8,-47.89,56.5,-47.8,52.2,-48.08
2018-07-06 14:00:00,72.0,-47.9,62.9,-47.86,52.6,-47.78,46.4,-48.05
2018-07-06 15:00:00,70.3,-47.89,60.7,-47.85,51.2,-47.78,43.5,-48.05
2018-07-06 16:00:00,71.5,-47.89,62.8,-47.85,50.7,-47.78,44.0,-48.05
2018-07-06 17:00:00,72.9,-47.9,63.8,-47.86,50.3,-47.79,44.2,-48.05
2018-07-06 18:00:00,73.6,-47.9,64.7,-47.85,48.9,-47.78,44.0,-48.04
2018-07-06 19:00:00,80.9,-47.92,65.8,-47.85,49.9,-47.77,44.4,-48.0
2018-07-06 20:00:00,103.4,-48.01,135.0,-48.15,56.5,-47.79,58.1,-48.04
2018-07-06 21:00:00,186.6,-48.35,305.0,-48.79,94.6,-47.91,125.5,-48.34
2018-07-06 22:00:00,234.0,-48.52,388.5,-49.08,121.3,-48.0,145.8,-48.41
2018-07-06 23:00:00,278.6,-48.67,493.5,-49.37,135.6,-48.02,186.9,-48.46
2018-07-07 00:00:00,318.7,-48.79,555.8,-49.55,148.1,-48.05,214.9,-48.52
2018-07-07 01:00:00,321.2,-48.81,547.2,-49.52,149.8,-48.06,215.4,-48.52
2018-07-07 02:00:00,355.7,-48.92,621.2,-49.72,161.3,-48.07,220.8,-48.46
2018-07-07 03:00:00,385.5,-49.01,667.1,-49.83,169.9,-48.08,222.4,-48.38
2018-07-07 04:00:00,430.3,-49.14,638.9,-49.7,184.9,-48.09,229.2,-48.27
2018-07-07 05:00:00,469.0,-49.24,638.3,-49.66,196.8,-48.1,245.1,-48.19
2018-07-07 06:00:00,419.4,-49.09,519.0,-49.32,180.0,-48.05,224.0,-48.14
2018-07-07 07:00:00,317.3,-48.77,304.7,-48.65,150.2,-47.97,180.0,-48.11
2018-07-07 08:00:00,246.8,-48.52,218.9,-48.37,132.3,-47.94,151.4,-48.16
2018-07-07 09:00:00,189.2,-48.35,164.0,-48.23,111.5,-47.95,117.7,-48.24
2018-07-07 10:00:00,146.9,-48.2,135.4,-48.14,93.6,-47.91,95.1,-48.23
2018-07-07 11:00:00,115.9,-48.1,118.7,-48.1,79.5,-47.88,78.3,-48.2
2018-07-07 12:00:00,98.5,-48.02,100.2,-48.03,71.5,-47.85,65.7,-48.14
2018-07-07 13:00:00,77.9,-47.94,79.4,-47.95,59.3,-47.81,54.6,-48.1
2018-07-07 14:00:00,61.3,-47.87,60.9,-47.87,46.4,-47.76,39.4,-48.05
2018-07-07 15:00:00,58.0,-47.85,56.7,-47.85,42.6,-47.75,37.1,-48.03
2018-07-07 16:00:00,62.7,-47.88,62.8,-47.88,43.4,-47.76,37.7,-48.02
2018-07-07 17:00:00,69.3,-47.91,69.4,-47.9,46.9,-47.79,40.8,-48.07
2018-07-07 18:00:00,69.9,-47.9,64.8,-47.87,48.1,-47.79,43.3,-48.05
2018-07-07 19:00:00,73.3,-47.9,58.8,-47.83,48.9,-47.78,45.6,-48.01
2018-07-07 20:00:00,99.0,-48.01,68.4,-47.87,59.2,-47.81,54.6,-48.01
2018-07-07 21:00:00,149.4,-48.19,145.1,-48.18,69.6,-47.84,78.8,-48.08
2018-07-07 22:00:00,193.5,-48.35,282.8,-48.7,97.0,-47.94,103.6,-48.23
2018-07-07 23:00:00,218.8,-48.42,350.1,-48.92,108.7,-47.96,115.1,-48.23
2018-07-08 00:00:00,237.6,-48.48,368.7,-48.97,114.9,-47.97,127.4,-48.28
2018-07-08 01:00:00,252.3,-48.51,362.4,-48.92,116.1,-47.96,126.5,-48.23
2018-07-08 02:00:00,265.5,-48.52,285.9,-48.61,111.2,-47.95,128.7,-48.18
2018-07-08 03:00:00,273.6,-48.52,258.3,-48.43,105.8,-47.93,132.7,-48.1
2018-07-08 04:00:00,295.6,-48.57,258.0,-48.39,105.4,-47.92,140.1,-48.05
2018-07-08 05:00:00,310.6,-48.6,304.3,-48.54,107.0,-47.92,148.7,-48.05
2018-07-08 06:00:00,317.1,-48.6,351.5,-48.67,108.0,-47.91,155.5,-48.0
2018-07-08 07:00:00,266.5,-48.42,245.1,-48.27,92.6,-47.88,141.2,-47.98
2018-07-08 08:00:00,187.1,-48.14,165.0,-48.01,72.3,-47.84,106.9,-48.0
2018-07-08 09:00:00,136.9,-48.0,131.8,-47.92,62.1,-47.83,85.8,-48.02
2018-07-08 10:00:00,95.6,-47.88,84.0,-47.81,49.5,-47.78,59.3,-47.99
2018-07-08 11:00:00,76.2,-47.86,68.6,-47.81,45.8,-47.76,50.0,-47.99
2018-07-08 12:00:00,64.9,-47.84,57.5,-47.81,44.1,-47.75,45.4,-48.01
2018-07-08 13:00:00,56.4,-47.82,54.6,-47.81,41.4,-47.74,43.2,-48.01
2018-07-08 14:00:00,59.3,-47.83,58.7,-47.82,42.1,-47.75,43.2,-48.02
2018-07-08 15:00:00,64.1,-47.82,63.3,-47.8,41.5,-47.74,43.6,-48.0
2018-07-08 16:00:00,67.0,-47.82,67.8,-47.78,40.7,-47.74,44.3,-48.0
2018-07-08 17:00:00,71.5,-47.83,69.8,-47.81,41.9,-47.75,44.7,-48.04
2018-07-08 18:00:00,82.0,-47.87,74.8,-47.84,42.9,-47.76,47.2,-48.05
2018-07-08 19:00:00,104.2,-47.97,126.3,-48.07,51.1,-47.79,58.1,-48.08
2018-07-08 20:00:00,112.8,-48.04,175.0,-48.31,55.8,-47.79,70.4,-48.18
2018-07-08 21:00:00,148.0,-48.19,239.6,-48.56,68.8,-47.81,69.1,-48.09
2018-07-08 22:00:00,158.7,-48.23,230.7,-48.52,74.9,-47.82,68.7,-48.07
2018-07-08 23:00:00,166.7,-48.25,257.8,-48.6,74.2,-47.81,70.8,-48.04
2018-07-09 00:00:00,238.4,-48.5,438.5,-49.19,96.1,-47.85,92.5,-48.0
2018-07-09 01:00:00,330.8,-48.81,595.1,-49.63,125.1,-47.91,133.3,-48.07
2018-07-09 02:00:00,384.2,-48.97,748.8,-50.01,140.4,-47.94,174.5,-48.13
2018-07-09 03:00:00,450.0,-49.17,931.6,-50.43,160.8,-47.98,213.0,-48.17
2018-07-09 04:00:00,507.8,-49.33,908.0,-50.32,176.8,-48.01,232.8,-48.03
2018-07-09 05:00:00,495.8,-49.29,673.3,-49.7,173.0,-48.0,205.9,-47.86
2018-07-09 06:00:00,477.6,-49.2,533.7,-49.24,175.0,-47.89,208.2,-47.72
2018-07-09 07:00:00,426.1,-49.0,406.0,-48.8,175.9,-47.71,196.2,-47.7
2018-07-09 08:00:00,226.4,-48.39,200.4,-48.22,111.0,-47.67,120.6,-47.91
2018-07-09 09:00:00,105.6,-48.01,95.4,-47.95,61.6,-47.75,66.2,-48.04
2018-07-09 10:00:00,79.9,-47.93,74.6,-47.89,52.3,-47.77,54.9,-48.08
2018-07-09 11:00:00,76.9,-47.92,67.8,-47.88,53.2,-47.79,48.7,-48.08
2018-07-09 12:00:00,80.9,-47.94,74.7,-47.92,51.8,-47.8,47.5,-48.09
2018-07-09 13:00:00,90.0,-47.98,84.5,-47.95,58.1,-47.84,54.6,-48.14
2018-07-09 14:00:00,90.5,-47.98,81.2,-47.94,62.0,-47.86,60.9,-48.15
2018-07-09 15:00:00,97.9,-47.98,89.2,-47.96,65.1,-47.89,66.7,-48.22
2018-07-09 16:00:00,114.3,-48.04,106.3,-48.03,67.7,-47.91,74.0,-48.33
2018-07-09 17:00:00,105.1,-48.06,123.5,-48.16,61.6,-47.89,67.2,-48.36
2018-07-09 18:00:00,86.4,-48.02,134.4,-48.24,50.8,-47.83,64.2,-48.37
2018-07-09 19:00:00,83.3,-47.97,134.3,-48.2,47.5,-47.8,62.5,-48.28
2018-07-09 20:00:00,81.4,-47.92,123.6,-48.11,43.8,-47.75,53.1,-48.16
2018-07-09 21:00:00,76.4,-47.91,117.5,-48.1,41.8,-47.74,45.8,-48.12
2018-07-09 22:00:00,72.7,-47.91,108.5,-48.07,39.9,-47.73,35.7,-48.09
2018-07-09 23:00:00,67.2,-47.9,90.8,-48.01,36.2,-47.73,26.6,-48.09
2018-07-10 00:00:00,69.8,-47.91,90.3,-48.01,35.5,-47.74,23.9,-48.08
2018-07-10 01:00:00,79.1,-47.95,93.5,-48.02,37.4,-47.75,27.8,-48.08
2018-07-10 02:00:00,77.0,-47.95,60.1,-47.87,36.7,-47.75,26.3,-48.11
2018-07-10 03:00:00,76.0,-47.96,46.6,-47.82,36.9,-47.76,20.4,-48.15
2018-07-10 04:00:00,73.9,-47.96,41.8,-47.81,36.5,-47.77,17.9,-48.19
2018-07-10 05:00:00,65.4,-47.91,36.3,-47.78,32.8,-47.75,15.4,-48.14
2018-07-10 06:00:00,62.6,-47.89,35.8,-47.77,31.4,-47.73,15.0,-48.09
2018-07-10 07:00:00,55.9,-47.87,35.1,-47.77,30.5,-47.72,15.0,-48.1
2018-07-10 08:00:00,49.3,-47.84,35.0,-47.77,28.4,-47.72,15.3,-48.09
2018-07-10 09:00:00,46.3,-47.82,36.3,-47.77,26.6,-47.71,16.1,-48.07
2018-07-10 10:00:00,45.8,-47.82,37.1,-47.78,27.3,-47.72,16.0,-48.09
2018-07-10 11:00:00,44.6,-47.81,35.4,-47.77,26.9,-47.72,16.3,-48.08
2018-07-10 12:00:00,46.2,-47.82,37.2,-47.78,27.7,-47.72,16.0,-48.11
2018-07-10 13:00:00,45.9,-47.82,39.6,-47.79,27.7,-47.72,15.4,-48.12
2018-07-10 14:00:00,45.2,-47.81,38.7,-47.78,28.1,-47.73,14.4,-48.13
2018-07-10 15:00:00,49.9,-47.85,40.8,-47.8,31.6,-47.76,15.3,-48.21
2018-07-10 16:00:00,56.2,-47.9,43.5,-47.84,37.5,-47.81,16.1,-48.36
2018-07-10 17:00:00,65.3,-47.97,51.3,-47.9,44.4,-47.87,19.1,-48.54
2018-07-10 18:00:00,72.8,-48.03,59.3,-47.96,49.1,-47.92,21.4,-48.66
2018-07-10 19:00:00,77.1,-48.03,64.5,-47.97,48.4,-47.9,24.5,-48.59
2018-07-10 20:00:00,87.0,-48.06,83.9,-48.04,49.0,-47.88,31.0,-48.52
2018-07-10 21:00:00,98.2,-48.07,105.3,-48.1,50.4,-47.85,38.2,-48.44
2018-07-10 22:00:00,102.9,-48.07,118.4,-48.13,48.1,-47.82,43.0,-48.35
2018-07-10 23:00:00,99.4,-48.03,111.6,-48.08,45.7,-47.79,42.6,-48.26
2018-07-11 00:00:00,91.4,-48.01,93.5,-48.01,43.3,-47.79,37.9,-48.26
2018-07-11 01:00:00,89.5,-48.0,84.5,-47.97,43.5,-47.79,35.9,-48.26
2018-07-11 02:00:00,86.7,-47.99,75.5,-47.93,42.5,-47.79,32.4,-48.24
2018-07-11 03:00:00,83.6,-47.98,59.7,-47.86,41.6,-47.78,27.0,-48.22
2018-07-11 04:00:00,87.5,-48.0,56.9,-47.86,43.2,-47.8,26.6,-48.26
2018-07-11 05:00:00,89.8,-48.01,57.3,-47.86,43.9,-47.8,25.6,-48.28
2018-07-11 06:00:00,84.7,-48.0,56.1,-47.86,42.1,-47.8,24.0,-48.28
2018-07-11 07:00:00,83.8,-47.99,65.3,-47.91,42.0,-47.8,26.3,-48.29
2018-07-11 08:00:00,81.4,-47.99,66.6,-47.91,40.8,-47.8,27.1,-48.29
2018-07-11 09:00:00,74.9,-47.96,54.3,-47.86,39.2,-47.8,22.6,-48.29
2018-07-11 10:00:00,71.4,-47.95,50.5,-47.85,38.4,-47.8,19.9,-48.3
2018-07-11 11:00:00,69.4,-47.94,48.8,-47.84,37.7,-47.79,19.7,-48.29
2018-07-11 12:00:00,67.1,-47.94,50.8,-47.86,37.5,-47.8,19.7,-48.32
2018-07-11 13:00:00,60.4,-47.9,52.6,-47.86,35.9,-47.79,19.2,-48.29
2018-07-11 14:00:00,58.4,-47.9,52.3,-47.86,36.2,-47.79,19.9,-48.29
2018-07-11 15:00:00,58.6,-47.89,54.4,-47.87,36.9,-47.79,20.6,-48.3
2018-07-11 16:00:00,59.1,-47.89,53.6,-47.86,36.8,-47.78,21.4,-48.28
2018-07-11 17:00:00,64.6,-47.92,61.0,-47.89,39.6,-47.8,24.6,-48.31
2018-07-11 18:00:00,69.9,-47.94,59.5,-47.88,41.5,-47.81,27.8,-48.3
2018-07-11 19:00:00,75.8,-47.96,60.4,-47.87,42.4,-47.8,28.8,-48.27
2018-07-11 20:00:00,98.9,-48.05,74.3,-47.92,49.7,-47.83,37.0,-48.29
2018-07-11 21:00:00,137.8,-48.19,143.2,-48.2,61.1,-47.85,57.1,-48.3
2018-07-11 22:00:00,175.9,-48.33,249.6,-48.61,73.1,-47.88,76.8,-48.38
2018-07-11 23:00:00,195.0,-48.42,335.8,-48.93,85.2,-47.93,105.2,-48.59
2018-07-12 00:00:00,176.2,-48.35,316.5,-48.87,79.3,-47.92,77.4,-48.46
2018-07-12 01:00:00,172.2,-48.33,305.6,-48.85,78.9,-47.91,67.1,-48.43
2018-07-12 02:00:00,170.5,-48.32,298.9,-48.81,78.3,-47.91,77.1,-48.45
2018-07-12 03:00:00,182.2,-48.37,280.3,-48.73,80.5,-47.92,88.2,-48.45
2018-07-12 04:00:00,198.8,-48.42,194.2,-48.38,78.1,-47.92,83.6,-48.41
2018-07-12 05:00:00,197.0,-48.41,150.4,-48.23,73.0,-47.91,74.1,-48.42
2018-07-12 06:00:00,164.1,-48.29,132.6,-48.16,67.8,-47.9,62.8,-48.4
2018-07-12 07:00:00,139.4,-48.19,91.1,-47.99,61.9,-47.87,48.7,-48.33
2018-07-12 08:00:00,122.1,-48.13,79.5,-47.94,58.4,-47.85,42.0,-48.31
2018-07-12 09:00:00,119.9,-48.12,103.7,-48.05,57.6,-47.85,46.6,-48.33
2018-07-12 10:00:00,120.3,-48.12,134.1,-48.17,57.5,-47.84,53.4,-48.32
2018-07-12 11:00:00,113.0,-48.09,121.1,-48.12,55.2,-47.84,51.1,-48.32
2018-07-12 12:00:00,95.7,-48.03,88.0,-47.98,50.6,-47.83,42.5,-48.33
2018-07-12 13:00:00,81.0,-47.97,77.9,-47.95,47.0,-47.82,34.8,-48.32
2018-07-12 14:00:00,77.3,-47.96,77.1,-47.96,46.9,-47.83,33.6,-48.34
2018-07-12 15:00:00,75.3,-47.95,78.0,-47.96,45.2,-47.81,31.2,-48.3
2018-07-12 16:00:00,79.9,-47.96,89.2,-48.01,46.2,-47.81,33.2,-48.29
2018-07-12 17:00:00,88.0,-48.0,115.3,-48.11,49.2,-47.82,39.3,-48.28
2018-07-12 18:00:00,93.5,-48.03,134.9,-48.19,51.9,-47.83,44.5,-48.32
2018-07-12 19:00:00,107.9,-48.08,159.5,-48.29,57.0,-47.84,51.0,-48.35
2018-07-12 20:00:00,134.2,-48.18,205.5,-48.47,65.8,-47.86,55.3,-48.35
2018-07-12 21:00:00,164.8,-48.29,281.0,-48.74,75.2,-47.87,68.2,-48.35
2018-07-12 22:00:00,187.2,-48.36,316.7,-48.85,82.6,-47.88,82.8,-48.4
2018-07-12 23:00:00,176.0,-48.32,305.4,-48.8,79.4,-47.87,89.2,-48.41
2018-07-13 00:00:00,183.9,-48.33,328.7,-48.86,78.8,-47.85,111.4,-48.46
2018-07-13 01:00:00,179.6,-48.3,319.0,-48.82,77.0,-47.84,108.5,-48.42
2018-07-13 02:00:00,178.4,-48.29,316.7,-48.8,76.5,-47.83,95.5,-48.35
2018-07-13 03:00:00,169.9,-48.25,293.9,-48.72,74.2,-47.82,83.8,-48.3
2018-07-13 04:00:00,165.1,-48.23,272.9,-48.64,74.0,-47.82,86.4,-48.32
2018-07-13 05:00:00,167.9,-48.24,278.1,-48.67,76.2,-47.82,91.8,-48.36
2018-07-13 06:00:00,166.8,-48.24,276.3,-48.66,77.6,-47.84,95.0,-48.36
2018-07-13 07:00:00,164.8,-48.24,266.4,-48.63,78.4,-47.84,90.5,-48.34
2018-07-13 08:00:00,166.1,-48.25,270.4,-48.66,79.9,-47.85,89.2,-48.38
2018-07-13 09:00:00,160.9,-48.24,247.7,-48.59,78.1,-47.85,85.1,-48.35
2018-07-13 10:00:00,151.9,-48.21,224.9,-48.5,74.3,-47.85,78.0,-48.34
2018-07-13 11:00:00,137.1,-48.16,184.4,-48.36,67.6,-47.84,67.1,-48.32
2018-07-13 12:00:00,102.7,-48.03,123.3,-48.12,53.5,-47.81,47.5,-48.27
2018-07-13 13:00:00,87.8,-47.98,104.3,-48.04,48.8,-47.8,42.4,-48.25
2018-07-13 14:00:00,80.6,-47.94,103.2,-48.05,46.0,-47.78,40.2,-48.22
2018-07-13 15:00:00,90.7,-47.99,114.8,-48.09,50.8,-47.8,47.0,-48.25
2018-07-13 16:00:00,114.2,-48.08,108.3,-48.05,61.9,-47.82,53.1,-48.26
2018-07-13 17:00:00,123.7,-48.12,108.9,-48.04,71.7,-47.8,57.3,-48.28
2018-07-13 18:00:00,140.6,-48.18,115.4,-48.04,77.6,-47.82,61.3,-48.24
2018-07-13 19:00:00,164.2,-48.27,209.2,-48.45,83.4,-47.85,70.7,-48.27
2018-07-13 20:00:00,151.1,-48.22,243.7,-48.58,72.7,-47.82,77.8,-48.3
2018-07-13 21:00:00,144.3,-48.18,254.5,-48.62,64.0,-47.79,77.9,-48.28
2018-07-13 22:00:00,185.3,-48.34,317.7,-48.84,82.0,-47.83,78.6,-48.22
2018-07-13 23:00:00,257.2,-48.6,291.3,-48.7,122.4,-47.91,104.5,-48.2
2018-07-14 00:00:00,178.7,-48.31,133.5,-48.07,105.7,-47.85,83.8,-48.16
2018-07-14 01:00:00,173.3,-48.3,133.9,-48.07,103.1,-47.84,79.0,-48.17
2018-07-14 02:00:00,260.3,-48.6,357.2,-48.94,118.5,-47.9,105.5,-48.18
2018-07-14 03:00:00,304.1,-48.75,524.2,-49.48,124.1,-47.91,119.0,-48.22
2018-07-14 04:00:00,319.9,-48.8,533.6,-49.49,128.8,-47.91,123.9,-48.17
2018-07-14 05:00:00,344.6,-48.88,581.7,-49.64,136.9,-47.93,124.2,-48.19
2018-07-14 06:00:00,386.6,-49.01,623.5,-49.74,150.8,-47.96,135.7,-48.18
2018-07-14 07:00:00,374.9,-48.98,496.4,-49.37,151.0,-47.96,132.2,-48.18
2018-07-14 08:00:00,289.7,-48.71,238.8,-48.48,133.3,-47.92,104.7,-48.17
2018-07-14 09:00:00,174.3,-48.32,124.8,-48.08,100.0,-47.86,74.2,-48.22
2018-07-14 10:00:00,124.1,-48.13,101.4,-48.0,77.9,-47.83,59.6,-48.21
2018-07-14 11:00:00,112.3,-48.08,91.6,-47.96,70.3,-47.81,53.9,-48.16
2018-07-14 12:00:00,91.9,-47.99,78.6,-47.91,58.5,-47.78,43.9,-48.13
2018-07-14 13:00:00,85.7,-47.97,63.3,-47.86,56.9,-47.78,39.3,-48.16
2018-07-14 14:00:00,68.0,-47.89,52.8,-47.82,48.9,-47.75,31.8,-48.12
2018-07-14 15:00:00,67.5,-47.89,52.2,-47.81,49.0,-47.75,30.9,-48.1
2018-07-14 16:00:00,68.2,-47.89,52.5,-47.82,50.3,-47.76,30.0,-48.12
2018-07-14 17:00:00,66.3,-47.88,52.7,-47.82,49.7,-47.76,28.2,-48.12
2018-07-14 18:00:00,67.5,-47.88,53.5,-47.82,49.3,-47.75,26.9,-48.11
2018-07-14 19:00:00,81.2,-47.94,59.4,-47.84,53.4,-47.75,28.8,-48.11
2018-07-14 20:00:00,107.0,-48.04,76.6,-47.88,63.3,-47.74,38.4,-48.08
2018-07-14 21:00:00,149.1,-48.2,98.7,-47.94,82.2,-47.74,53.3,-48.07
2018-07-14 22:00:00,170.7,-48.26,105.9,-47.93,98.3,-47.71,65.3,-48.02
2018-07-14 23:00:00,160.1,-48.22,115.7,-47.97,107.1,-47.77,77.5,-48.0
2018-07-15 00:00:00,187.4,-48.32,137.5,-48.03,129.4,-47.82,91.8,-47.99
2018-07-15 01:00:00,218.3,-48.43,160.5,-48.1,150.6,-47.82,109.9,-48.03
2018-07-15 02:00:00,262.6,-48.57,188.4,-48.16,180.5,-47.81,135.0,-48.03
2018-07-15 03:00:00,309.8,-48.71,229.4,-48.26,212.9,-47.81,174.6,-48.05
2018-07-15 04:00:00,314.5,-48.72,255.0,-48.36,221.3,-47.85,201.3,-48.15
2018-07-15 05:00:00,288.7,-48.65,249.0,-48.37,208.0,-47.86,207.3,-48.23
2018-07-15 06:00:00,284.7,-48.64,236.2,-48.34,196.3,-47.87,198.5,-48.18
2018-07-15 07:00:00,272.5,-48.61,227.1,-48.32,184.6,-47.88,198.2,-48.22
2018-07-15 08:00:00,206.6,-48.4,176.4,-48.2,146.9,-47.87,142.3,-48.22
2018-07-15 09:00:00,115.1,-48.07,108.4,-48.01,91.6,-47.82,87.9,-48.21
2018-07-15 10:00:00,92.9,-47.99,86.6,-47.94,76.0,-47.8,62.4,-48.18
2018-07-15 11:00:00,85.2,-47.96,72.4,-47.89,69.3,-47.79,52.6,-48.13
2018-07-15 12:00:00,71.2,-47.91,57.9,-47.84,58.1,-47.77,38.5,-48.1
2018-07-15 13:00:00,62.9,-47.88,54.6,-47.83,53.2,-47.77,36.1,-48.06
2018-07-15 14:00:00,58.5,-47.86,51.3,-47.82,50.1,-47.76,36.1,-48.06
2018-07-15 15:00:00,56.4,-47.86,50.0,-47.82,50.5,-47.78,35.2,-48.06
2018-07-15 16:00:00,54.6,-47.86,46.3,-47.81,50.6,-47.79,32.0,-48.07
2018-07-15 17:00:00,50.7,-47.84,44.3,-47.8,47.0,-47.78,33.6,-48.04
2018-07-15 18:00:00,51.9,-47.84,46.5,-47.81,44.8,-47.77,36.3,-48.03
2018-07-15 19:00:00,57.8,-47.88,47.6,-47.83,44.1,-47.79,36.6,-48.1
2018-07-15 20:00:00,74.4,-47.96,50.6,-47.83,50.5,-47.81,41.5,-48.1
2018-07-15 21:00:00,106.0,-48.07,58.4,-47.83,61.6,-47.82,54.1,-48.03
2018-07-15 22:00:00,152.4,-48.23,77.2,-47.85,79.9,-47.83,78.7,-47.96
2018-07-15 23:00:00,179.7,-48.31,97.3,-47.89,92.7,-47.8,93.6,-47.92
2018-07-16 00:00:00,205.7,-48.42,121.7,-48.01,97.6,-47.84,97.0,-47.95
2018-07-16 01:00:00,248.0,-48.56,150.2,-48.09,112.8,-47.84,112.4,-47.92
2018-07-16 02:00:00,327.6,-48.81,193.8,-48.16,146.3,-47.85,153.7,-47.83
2018-07-16 03:00:00,335.1,-48.78,216.7,-48.18,163.3,-47.74,177.1,-47.81
2018-07-16 04:00:00,297.9,-48.72,195.8,-48.22,142.3,-47.84,151.3,-47.97
2018-07-16 05:00:00,295.1,-48.74,202.3,-48.29,140.2,-47.91,145.9,-48.03
2018-07-16 06:00:00,311.2,-48.8,209.7,-48.28,147.3,-47.93,157.2,-48.0
2018-07-16 07:00:00,297.4,-48.75,206.0,-48.29,140.7,-47.95,142.2,-48.03
2018-07-16 08:00:00,213.6,-48.48,151.0,-48.18,106.3,-47.96,100.4,-48.16
2018-07-16 09:00:00,124.5,-48.16,105.5,-48.05,72.9,-47.89,66.0,-48.15
2018-07-16 10:00:00,98.7,-48.06,92.1,-47.99,64.0,-47.84,61.1,-48.15
2018-07-16 11:00:00,89.0,-48.01,82.4,-47.95,61.1,-47.81,55.4,-48.12
2018-07-16 12:00:00,77.2,-47.96,73.0,-47.92,57.3,-47.79,46.8,-48.09
2018-07-16 13:00:00,71.5,-47.93,63.8,-47.89,53.8,-47.78,38.8,-48.06
2018-07-16 14:00:00,65.1,-47.91,55.9,-47.86,52.9,-47.8,37.8,-48.07
2018-07-16 15:00:00,61.5,-47.91,52.7,-47.86,55.1,-47.83,36.2,-48.11
2018-07-16 16:00:00,58.1,-47.89,49.2,-47.85,54.9,-47.84,32.9,-48.12
2018-07-16 17:00:00,60.7,-47.91,49.8,-47.86,54.2,-47.85,33.5,-48.16
2018-07-16 18:00:00,61.6,-47.91,49.3,-47.85,53.9,-47.84,32.1,-48.12
2018-07-16 19:00:00,70.1,-47.94,52.1,-47.85,59.7,-47.84,34.4,-48.12
2018-07-16 20:00:00,88.0,-48.05,81.0,-48.0,79.1,-47.94,60.4,-48.33
2018-07-16 21:00:00,66.3,-47.93,56.7,-47.87,52.4,-47.82,42.3,-48.17
2018-07-16 22:00:00,54.6,-47.84,48.4,-47.8,38.6,-47.71,37.0,-47.98
2018-07-16 23:00:00,61.5,-47.86,60.9,-47.84,44.6,-47.71,49.6,-48.01
2018-07-17 00:00:00,66.7,-47.9,69.9,-47.9,51.4,-47.76,59.3,-48.09
2018-07-17 01:00:00,76.1,-47.95,82.1,-47.97,59.1,-47.8,71.0,-48.15
2018-07-17 02:00:00,79.6,-47.97,85.6,-48.0,60.0,-47.81,71.4,-48.16
2018-07-17 03:00:00,79.5,-47.98,86.4,-48.01,59.4,-47.8,75.5,-48.16
2018-07-17 04:00:00,77.8,-47.97,88.4,-48.03,60.7,-47.81,76.5,-48.2
2018-07-17 05:00:00,81.8,-48.0,96.2,-48.08,63.6,-47.83,83.8,-48.29
2018-07-17 06:00:00,89.2,-48.03,106.1,-48.12,70.8,-47.86,92.0,-48.34
2018-07-17 07:00:00,92.4,-48.06,118.0,-48.19,77.1,-47.91,104.7,-48.46
2018-07-17 08:00:00,76.6,-48.0,99.4,-48.11,72.7,-47.93,86.2,-48.44
2018-07-17 09:00:00,61.3,-47.95,67.8,-47.98,61.3,-47.9,58.6,-48.4
2018-07-17 10:00:00,46.9,-47.88,48.1,-47.88,45.0,-47.83,37.4,-48.3
2018-07-17 11:00:00,38.4,-47.82,38.0,-47.82,35.1,-47.78,27.4,-48.2
2018-07-17 12:00:00,34.1,-47.79,32.7,-47.79,31.8,-47.75,20.9,-48.1
2018-07-17 13:00:00,33.1,-47.78,29.4,-47.76,31.5,-47.75,18.4,-48.06
2018-07-17 14:00:00,30.1,-47.76,27.5,-47.75,28.9,-47.73,16.3,-48.01
2018-07-17 15:00:00,32.5,-47.77,29.7,-47.76,30.7,-47.74,19.4,-48.03
2018-07-17 16:00:00,36.5,-47.79,33.4,-47.78,34.7,-47.76,22.0,-48.06
2018-07-17 17:00:00,41.7,-47.82,38.4,-47.81,39.0,-47.78,23.9,-48.1
2018-07-17 18:00:00,49.8,-47.86,44.5,-47.83,44.9,-47.8,28.1,-48.14
2018-07-17 19:00:00,55.6,-47.89,49.2,-47.85,50.6,-47.82,32.3,-48.16
2018-07-17 20:00:00,66.3,-47.93,53.3,-47.86,57.0,-47.83,36.4,-48.14
2018-07-17 21:00:00,91.2,-48.02,65.6,-47.87,72.8,-47.82,43.7,-48.12
2018-07-17 22:00:00,126.3,-48.14,79.4,-47.88,93.2,-47.79,55.5,-48.1
2018-07-17 23:00:00,143.9,-48.19,95.4,-47.92,109.6,-47.79,62.9,-48.06
2018-07-18 00:00:00,164.8,-48.26,106.0,-47.95,120.5,-47.78,71.4,-48.05
2018-07-18 01:00:00,158.1,-48.25,100.8,-47.94,115.3,-47.8,70.4,-48.08
2018-07-18 02:00:00,168.4,-48.28,107.0,-47.95,119.5,-47.8,75.1,-48.06
2018-07-18 03:00:00,207.6,-48.41,135.7,-48.01,138.7,-47.78,93.7,-48.01
2018-07-18 04:00:00,214.3,-48.44,148.4,-48.07,145.8,-47.8,98.4,-48.06
2018-07-18 05:00:00,217.3,-48.44,160.0,-48.12,154.4,-47.8,105.0,-48.09
2018-07-18 06:00:00,216.5,-48.45,167.7,-48.16,158.5,-47.83,117.5,-48.15
2018-07-18 07:00:00,178.9,-48.34,141.9,-48.12,135.0,-47.88,99.7,-48.21
2018-07-18 08:00:00,110.9,-48.12,86.4,-47.98,86.3,-47.87,60.5,-48.25
2018-07-18 09:00:00,67.1,-47.94,62.1,-47.89,53.6,-47.81,39.1,-48.14
2018-07-18 10:00:00,63.1,-47.91,57.5,-47.86,48.3,-47.79,35.3,-48.1
2018-07-18 11:00:00,54.6,-47.87,47.4,-47.81,42.3,-47.75,31.0,-48.04
2018-07-18 12:00:00,51.4,-47.85,43.9,-47.79,39.6,-47.74,28.1,-48.01
2018-07-18 13:00:00,41.1,-47.79,36.9,-47.76,32.1,-47.71,22.4,-47.95
2018-07-18 14:00:00,38.8,-47.78,34.0,-47.74,31.3,-47.7,21.3,-47.93
2018-07-18 15:00:00,45.1,-47.81,37.6,-47.77,35.8,-47.72,23.7,-47.97
2018-07-18 16:00:00,47.6,-47.83,40.9,-47.78,36.1,-47.72,22.3,-47.99
2018-07-18 17:00:00,44.9,-47.8,36.9,-47.76,33.5,-47.7,21.0,-47.94
2018-07-18 18:00:00,46.2,-47.8,36.8,-47.75,34.7,-47.69,20.1,-47.91
2018-07-18 19:00:00,65.9,-47.87,42.4,-47.74,40.6,-47.67,23.7,-47.85
2018-07-18 20:00:00,119.2,-48.08,68.1,-47.79,60.4,-47.65,40.4,-47.79
2018-07-18 21:00:00,178.3,-48.29,94.1,-47.83,89.0,-47.63,60.9,-47.74
2018-07-18 22:00:00,171.2,-48.25,96.1,-47.81,101.5,-47.67,70.2,-47.73
2018-07-18 23:00:00,222.7,-48.42,122.3,-47.86,131.5,-47.71,96.3,-47.69
2018-07-19 00:00:00,296.4,-48.65,159.4,-47.92,169.2,-47.7,130.2,-47.63
2018-07-19 01:00:00,333.1,-48.75,187.7,-47.98,193.0,-47.71,146.5,-47.6
2018-07-19 02:00:00,399.6,-48.99,226.2,-48.15,204.6,-47.82,156.9,-47.61
2018-07-19 03:00:00,491.6,-49.26,246.1,-48.16,230.8,-47.88,180.1,-47.53
2018-07-19 04:00:00,523.2,-49.35,274.4,-48.26,239.6,-47.89,186.4,-47.51
2018-07-19 05:00:00,620.5,-49.63,447.4,-48.89,262.3,-47.98,210.4,-47.55
2018-07-19 06:00:00,636.2,-49.68,716.9,-49.77,252.3,-48.02,222.7,-47.67
2018-07-19 07:00:00,501.4,-49.35,700.9,-49.84,192.5,-47.98,180.3,-47.79
2018-07-19 08:00:00,252.6,-48.59,284.8,-48.69,103.2,-47.85,85.3,-47.89
2018-07-19 09:00:00,111.1,-48.08,120.2,-48.12,54.2,-47.76,41.4,-47.95
2018-07-19 10:00:00,52.6,-47.83,45.4,-47.79,31.2,-47.71,23.1,-47.88
2018-07-19 11:00:00,48.0,-47.82,31.0,-47.73,30.6,-47.71,21.9,-47.86
2018-07-19 12:00:00,44.4,-47.8,31.7,-47.74,30.4,-47.7,21.3,-47.87
2018-07-19 13:00:00,43.8,-47.8,34.8,-47.75,30.9,-47.7,23.5,-47.87
2018-07-19 14:00:00,43.5,-47.79,37.2,-47.75,30.2,-47.69,23.8,-47.86
2018-07-19 15:00:00,55.9,-47.84,66.6,-47.88,34.8,-47.71,30.6,-47.88
2018-07-19 16:00:00,74.5,-47.9,104.0,-48.04,41.4,-47.75,40.2,-47.95
2018-07-19 17:00:00,91.7,-47.94,129.7,-48.09,47.4,-47.78,57.1,-48.01
2018-07-19 18:00:00,108.6,-48.0,173.0,-48.26,52.3,-47.79,70.0,-48.05
2018-07-19 19:00:00,122.7,-48.09,196.8,-48.38,59.9,-47.8,62.0,-48.01
2018-07-19 20:00:00,126.9,-48.12,214.7,-48.45,60.8,-47.79,62.5,-47.98
2018-07-19 21:00:00,148.4,-48.19,264.3,-48.63,62.1,-47.79,67.1,-47.97
2018-07-19 22:00:00,177.7,-48.28,337.9,-48.85,69.4,-47.8,87.1,-47.96
2018-07-19 23:00:00,221.4,-48.43,424.9,-49.11,82.5,-47.82,105.4,-47.96
2018-07-20 00:00:00,221.0,-48.44,422.5,-49.1,83.4,-47.83,103.4,-47.94
2018-07-20 01:00:00,303.7,-48.72,503.1,-49.32,111.7,-47.88,137.6,-47.94
2018-07-20 02:00:00,354.1,-48.87,641.7,-49.7,129.9,-47.91,155.3,-47.93
2018-07-20 03:00:00,381.2,-48.95,778.7,-50.07,136.8,-47.92,185.1,-48.07
2018-07-20 04:00:00,330.8,-48.79,611.2,-49.62,118.0,-47.89,217.2,-48.25
2018-07-20 05:00:00,305.3,-48.7,567.9,-49.5,109.9,-47.88,199.3,-48.23
2018-07-20 06:00:00,271.1,-48.58,489.2,-49.28,104.4,-47.88,154.1,-48.09
2018-07-20 07:00:00,254.8,-48.53,327.9,-48.76,110.4,-47.9,125.1,-48.01
2018-07-20 08:00:00,173.0,-48.27,122.1,-47.99,96.1,-47.89,97.1,-48.01
2018-07-20 09:00:00,123.3,-48.1,96.1,-47.96,81.0,-47.84,80.2,-48.05
2018-07-20 10:00:00,93.7,-47.98,76.1,-47.88,65.8,-47.79,61.5,-47.98
2018-07-20 11:00:00,84.6,-47.94,66.0,-47.84,59.2,-47.77,54.2,-47.97
2018-07-20 12:00:00,78.6,-47.92,62.6,-47.83,55.7,-47.77,51.4,-47.97
2018-07-20 13:00:00,73.3,-47.89,61.3,-47.83,52.4,-47.76,48.3,-47.96
2018-07-20 14:00:00,75.7,-47.9,58.4,-47.81,53.8,-47.76,49.9,-47.94
2018-07-20 15:00:00,76.1,-47.9,56.1,-47.79,54.2,-47.76,50.6,-47.95
2018-07-20 16:00:00,78.2,-47.91,55.7,-47.8,54.9,-47.76,49.3,-47.94
2018-07-20 17:00:00,79.8,-47.92,54.5,-47.79,51.7,-47.75,45.2,-47.91
2018-07-20 18:00:00,86.7,-47.95,57.0,-47.8,52.3,-47.76,47.8,-47.91
2018-07-20 19:00:00,100.6,-48.02,67.8,-47.85,59.4,-47.78,55.3,-47.93
2018-07-20 20:00:00,103.5,-48.03,81.7,-47.9,64.5,-47.76,65.5,-47.95
2018-07-20 21:00:00,111.6,-48.06,95.3,-47.96,73.4,-47.78,74.1,-48.01
2018-07-20 22:00:00,133.5,-48.13,115.1,-48.01,86.3,-47.77,80.4,-48.0
2018-07-20 23:00:00,132.7,-48.12,101.3,-47.94,86.5,-47.76,74.6,-47.96
2018-07-21 00:00:00,141.5,-48.15,101.1,-47.92,89.0,-47.75,75.7,-47.93
2018-07-21 01:00:00,160.5,-48.22,109.5,-47.94,99.1,-47.75,83.6,-47.9
2018-07-21 02:00:00,182.0,-48.28,123.2,-47.96,112.9,-47.75,93.4,-47.9
2018-07-21 03:00:00,198.7,-48.34,134.4,-47.99,122.1,-47.74,99.5,-47.88
2018-07-21 04:00:00,204.1,-48.35,141.2,-48.0,130.6,-47.73,106.0,-47.87
2018-07-21 05:00:00,206.3,-48.36,146.0,-48.03,134.1,-47.74,108.7,-47.88
2018-07-21 06:00:00,168.1,-48.23,133.9,-48.02,112.3,-47.75,98.9,-47.9
2018-07-21 07:00:00,155.9,-48.19,131.7,-48.04,101.9,-47.75,89.1,-47.89
2018-07-21 08:00:00,159.9,-48.21,156.0,-48.15,95.9,-47.77,91.0,-47.9
2018-07-21 09:00:00,161.9,-48.22,173.9,-48.24,89.5,-47.77,92.0,-47.9
2018-07-21 10:00:00,146.4,-48.17,164.1,-48.21,80.4,-47.76,85.1,-47.9
2018-07-21 11:00:00,137.3,-48.13,138.9,-48.11,76.6,-47.75,80.8,-47.9
2018-07-21 12:00:00,127.9,-48.09,119.0,-48.04,76.2,-47.75,78.2,-47.91
2018-07-21 13:00:00,118.3,-48.06,102.8,-47.97,74.2,-47.75,79.9,-47.95
2018-07-21 14:00:00,113.0,-48.04,98.8,-47.97,69.7,-47.75,76.8,-47.95
2018-07-21 15:00:00,108.9,-48.03,94.3,-47.96,68.2,-47.76,75.8,-47.97
2018-07-21 16:00:00,108.5,-48.03,97.3,-47.98,68.5,-47.78,79.2,-48.0
2018-07-21 17:00:00,115.9,-48.07,97.4,-47.99,69.4,-47.8,75.4,-48.01
2018-07-21 18:00:00,130.1,-48.13,129.4,-48.12,72.0,-47.82,79.6,-47.99
2018-07-21 19:00:00,142.1,-48.17,143.9,-48.16,85.1,-47.82,87.9,-47.98
2018-07-21 20:00:00,145.6,-48.17,120.1,-48.0,110.7,-47.83,96.5,-47.99
2018-07-21 21:00:00,158.2,-48.24,125.7,-48.05,99.4,-47.82,100.5,-48.01
2018-07-21 22:00:00,145.7,-48.24,102.7,-48.03,74.8,-47.89,73.5,-48.04
2018-07-21 23:00:00,184.8,-48.37,141.3,-48.14,108.1,-47.92,118.5,-48.16
2018-07-22 00:00:00,213.5,-48.46,199.3,-48.32,155.7,-47.95,206.1,-48.4
2018-07-22 01:00:00,252.0,-48.59,207.0,-48.32,164.2,-47.97,214.6,-48.35
2018-07-22 02:00:00,317.3,-48.79,232.1,-48.33,190.7,-47.95,233.7,-48.26
2018-07-22 03:00:00,377.8,-48.94,278.4,-48.41,229.6,-47.89,263.2,-48.21
2018-07-22 04:00:00,380.3,-48.92,302.7,-48.49,244.0,-47.83,272.1,-48.29
2018-07-22 05:00:00,358.8,-48.87,317.1,-48.61,232.9,-47.85,286.4,-48.44
2018-07-22 06:00:00,338.2,-48.84,328.1,-48.72,234.4,-47.96,293.6,-48.61
2018-07-22 07:00:00,299.1,-48.75,280.8,-48.63,206.6,-48.02,266.5,-48.67
2018-07-22 08:00:00,232.3,-48.58,210.6,-48.47,150.5,-48.02,185.8,-48.57
2018-07-22 09:00:00,187.7,-48.46,167.1,-48.36,118.6,-48.01,133.6,-48.52
2018-07-22 10:00:00,151.4,-48.35,149.5,-48.34,101.4,-48.01,113.5,-48.59
2018-07-22 11:00:00,123.3,-48.24,125.2,-48.25,87.1,-47.99,94.5,-48.55
2018-07-22 12:00:00,91.6,-48.11,96.6,-48.14,66.7,-47.94,64.7,-48.49
2018-07-22 13:00:00,91.5,-48.11,98.4,-48.14,63.0,-47.94,59.5,-48.46
2018-07-22 14:00:00,96.4,-48.13,105.0,-48.16,65.2,-47.95,62.0,-48.47
2018-07-22 15:00:00,87.3,-48.09,93.0,-48.11,62.4,-47.93,58.0,-48.42
2018-07-22 16:00:00,83.5,-48.08,84.1,-48.08,60.4,-47.92,52.9,-48.41
2018-07-22 17:00:00,87.0,-48.1,86.5,-48.09,60.1,-47.92,51.2,-48.39
2018-07-22 18:00:00,87.1,-48.1,84.6,-48.09,60.8,-47.93,51.6,-48.42
2018-07-22 19:00:00,90.1,-48.11,82.7,-48.08,61.2,-47.92,51.2,-48.41
2018-07-22 20:00:00,116.9,-48.2,99.4,-48.1,75.9,-47.92,64.4,-48.37
2018-07-22 21:00:00,150.6,-48.35,114.9,-48.15,103.5,-47.98,82.3,-48.48
2018-07-22 22:00:00,183.3,-48.47,133.3,-48.2,115.0,-47.98,88.5,-48.45
2018-07-22 23:00:00,216.4,-48.59,158.6,-48.28,128.8,-47.98,102.4,-48.44
2018-07-23 00:00:00,254.1,-48.72,179.4,-48.33,148.4,-48.0,115.0,-48.43
2018-07-23 01:00:00,276.5,-48.78,184.7,-48.32,169.2,-48.02,129.7,-48.44
2018-07-23 02:00:00,327.4,-48.92,213.3,-48.35,207.6,-48.04,156.9,-48.39
2018-07-23 03:00:00,422.8,-49.16,277.0,-48.44,262.5,-48.02,218.6,-48.24
2018-07-23 04:00:00,448.0,-49.21,332.3,-48.61,293.1,-48.04,263.6,-48.38
2018-07-23 05:00:00,355.0,-48.94,325.5,-48.71,262.8,-48.04,250.5,-48.63
2018-07-23 06:00:00,262.0,-48.69,262.3,-48.62,210.9,-48.12,200.0,-48.7
2018-07-23 07:00:00,226.1,-48.59,206.0,-48.46,186.0,-48.11,157.7,-48.71
2018-07-23 08:00:00,175.0,-48.45,155.9,-48.34,149.6,-48.11,122.1,-48.71
2018-07-23 09:00:00,101.2,-48.17,92.6,-48.13,93.8,-48.03,68.5,-48.56
2018-07-23 10:00:00,70.6,-48.04,69.9,-48.04,69.5,-47.98,49.2,-48.48
2018-07-23 11:00:00,70.8,-48.05,67.8,-48.04,67.5,-47.99,44.8,-48.52
2018-07-23 12:00:00,70.3,-48.04,64.7,-48.02,61.9,-47.96,46.1,-48.49
2018-07-23 13:00:00,72.5,-48.05,68.0,-48.04,60.0,-47.95,45.6,-48.5
2018-07-23 14:00:00,76.4,-48.07,72.8,-48.06,61.6,-47.96,48.1,-48.51
2018-07-23 15:00:00,75.3,-48.07,76.2,-48.08,62.5,-47.97,50.3,-48.53
2018-07-23 16:00:00,76.5,-48.09,76.7,-48.1,66.8,-48.01,49.3,-48.58
2018-07-23 17:00:00,75.3,-48.08,72.7,-48.08,64.6,-47.99,47.1,-48.56
2018-07-23 18:00:00,79.1,-48.08,71.0,-48.05,64.1,-47.97,46.9,-48.51
2018-07-23 19:00:00,96.0,-48.14,76.9,-48.05,69.4,-47.95,48.8,-48.49
2018-07-23 20:00:00,115.2,-48.2,82.8,-48.03,74.1,-47.91,52.5,-48.4
2018-07-23 21:00:00,134.5,-48.27,99.3,-48.08,82.0,-47.89,58.4,-48.39
2018-07-23 22:00:00,145.2,-48.31,113.0,-48.14,92.7,-47.9,65.5,-48.42
2018-07-23 23:00:00,160.5,-48.36,122.2,-48.16,105.3,-47.91,75.0,-48.42
2018-07-24 00:00:00,162.6,-48.36,121.2,-48.15,109.5,-47.91,79.3,-48.4
2018-07-24 01:00:00,167.0,-48.36,125.0,-48.15,114.4,-47.9,79.5,-48.35
2018-07-24 02:00:00,170.5,-48.37,126.9,-48.15,122.0,-47.92,86.4,-48.35
2018-07-24 03:00:00,172.4,-48.38,131.3,-48.16,130.9,-47.97,92.8,-48.35
2018-07-24 04:00:00,171.5,-48.38,130.0,-48.16,133.0,-47.97,94.3,-48.4
2018-07-24 05:00:00,146.4,-48.29,114.4,-48.12,120.5,-47.98,82.0,-48.38
2018-07-24 06:00:00,131.6,-48.23,109.5,-48.1,114.5,-47.99,79.6,-48.39
2018-07-24 07:00:00,125.2,-48.21,113.1,-48.13,120.7,-48.01,80.4,-48.41
2018-07-24 08:00:00,111.4,-48.16,101.9,-48.1,113.0,-48.02,71.5,-48.45
2018-07-24 09:00:00,90.6,-48.09,77.5,-48.01,89.4,-47.97,56.2,-48.4
2018-07-24 10:00:00,75.9,-48.03,64.6,-47.97,77.9,-47.95,47.7,-48.37
2018-07-24 11:00:00,67.2,-48.02,55.3,-47.96,64.5,-47.96,41.1,-48.4
2018-07-24 12:00:00,64.1,-48.01,56.2,-47.97,57.4,-47.95,40.3,-48.38
2018-07-24 13:00:00,64.0,-48.0,57.8,-47.97,56.2,-47.94,40.9,-48.35
2018-07-24 14:00:00,64.7,-48.0,58.5,-47.97,56.2,-47.93,40.1,-48.32
2018-07-24 15:00:00,64.3,-48.0,56.7,-47.96,55.1,-47.92,37.0,-48.29
2018-07-24 16:00:00,65.4,-47.99,54.9,-47.94,54.3,-47.9,35.0,-48.28
2018-07-24 17:00:00,67.0,-47.99,53.4,-47.92,53.5,-47.88,34.0,-48.26
2018-07-24 18:00:00,67.8,-47.98,50.0,-47.89,52.2,-47.86,31.8,-48.2
2018-07-24 19:00:00,77.9,-48.0,51.2,-47.85,53.4,-47.82,33.1,-48.11
2018-07-24 20:00:00,104.4,-48.1,67.2,-47.89,63.3,-47.79,39.2,-48.07
2018-07-24 21:00:00,133.7,-48.19,82.9,-47.9,77.5,-47.74,50.8,-48.01
2018-07-24 22:00:00,154.7,-48.24,117.3,-48.01,106.6,-47.79,77.4,-48.03
2018-07-24 23:00:00,200.4,-48.42,156.1,-48.16,133.3,-47.93,144.0,-48.2
2018-07-25 00:00:00,215.2,-48.53,136.4,-48.18,102.5,-48.01,99.9,-48.23
2018-07-25 01:00:00,220.3,-48.56,166.3,-48.33,98.2,-48.0,98.2,-48.3
2018-07-25 02:00:00,221.5,-48.54,155.3,-48.26,94.7,-47.98,97.7,-48.28
2018-07-25 03:00:00,195.2,-48.44,126.4,-48.14,86.3,-47.97,84.0,-48.3
2018-07-25 04:00:00,188.8,-48.41,126.9,-48.15,85.2,-47.97,82.9,-48.32
2018-07-25 05:00:00,171.4,-48.35,124.5,-48.15,80.6,-47.97,77.7,-48.33
2018-07-25 06:00:00,177.5,-48.37,153.1,-48.28,82.8,-47.98,84.6,-48.38
2018-07-25 07:00:00,160.2,-48.31,160.5,-48.33,76.8,-47.98,85.4,-48.41
2018-07-25 08:00:00,149.9,-48.28,161.5,-48.35,74.1,-47.98,80.5,-48.41
2018-07-25 09:00:00,133.1,-48.22,147.3,-48.29,68.2,-47.95,74.8,-48.38
2018-07-25 10:00:00,123.9,-48.18,139.3,-48.26,64.7,-47.93,68.8,-48.33
2018-07-25 11:00:00,119.5,-48.18,140.7,-48.27,63.8,-47.93,64.4,-48.3
2018-07-25 12:00:00,100.9,-48.1,109.5,-48.13,58.1,-47.9,55.7,-48.26
2018-07-25 13:00:00,96.4,-48.08,94.9,-48.06,57.5,-47.87,54.1,-48.24
2018-07-25 14:00:00,93.7,-48.06,88.1,-48.02,57.6,-47.84,52.6,-48.21
2018-07-25 15:00:00,90.5,-48.04,85.6,-48.0,58.5,-47.83,52.6,-48.22
2018-07-25 16:00:00,93.9,-48.05,87.6,-48.02,61.7,-47.84,53.6,-48.23
2018-07-25 17:00:00,100.1,-48.09,92.0,-48.03,65.1,-47.86,54.5,-48.24
2018-07-25 18:00:00,104.2,-48.11,91.6,-48.04,66.9,-47.86,55.5,-48.21
2018-07-25 19:00:00,106.8,-48.14,94.8,-48.07,70.5,-47.9,59.6,-48.29
2018-07-25 20:00:00,127.2,-48.22,101.7,-48.08,75.3,-47.89,61.3,-48.25
2018-07-25 21:00:00,156.0,-48.34,127.8,-48.19,87.7,-47.92,70.1,-48.33
2018-07-25 22:00:00,231.1,-48.62,236.2,-48.61,118.5,-47.98,105.9,-48.41
2018-07-25 23:00:00,271.8,-48.77,285.6,-48.8,134.6,-48.05,117.3,-48.44
2018-07-26 00:00:00,254.9,-48.73,183.5,-48.39,131.6,-48.05,111.1,-48.43
2018-07-26 01:00:00,314.8,-48.91,331.2,-48.9,151.0,-48.06,133.7,-48.35
2018-07-26 02:00:00,397.4,-49.14,725.9,-50.09,165.8,-48.1,183.6,-48.45
2018-07-26 03:00:00,365.7,-49.04,626.3,-49.82,150.5,-48.09,221.6,-48.66
2018-07-26 04:00:00,362.5,-49.01,656.4,-49.86,150.2,-48.1,234.8,-48.65
2018-07-26 05:00:00,357.9,-48.95,629.1,-49.73,147.9,-48.1,237.4,-48.56
2018-07-26 06:00:00,302.7,-48.72,518.5,-49.37,129.5,-48.07,192.2,-48.4
2018-07-26 07:00:00,311.8,-48.67,524.9,-49.28,130.4,-48.08,211.8,-48.42
2018-07-26 08:00:00,315.8,-48.6,507.4,-49.15,134.3,-48.1,219.8,-48.46
2018-07-26 09:00:00,201.8,-48.37,253.8,-48.53,118.8,-48.07,123.2,-48.44
2018-07-26 10:00:00,110.5,-48.1,97.4,-48.04,88.5,-47.97,69.7,-48.3
2018-07-26 11:00:00,85.6,-48.01,69.8,-47.93,71.3,-47.92,57.0,-48.21
2018-07-26 12:00:00,72.5,-47.96,61.7,-47.9,61.6,-47.88,48.8,-48.16
2018-07-26 13:00:00,89.0,-48.03,106.5,-48.1,65.4,-47.89,57.3,-48.17
2018-07-26 14:00:00,108.4,-48.11,118.5,-48.15,77.9,-47.94,72.5,-48.26
2018-07-26 15:00:00,77.9,-47.99,64.4,-47.93,66.8,-47.9,52.2,-48.2
2018-07-26 16:00:00,73.8,-47.97,62.4,-47.9,62.2,-47.88,50.9,-48.16
2018-07-26 17:00:00,92.9,-48.04,77.2,-47.96,79.3,-47.92,63.4,-48.24
2018-07-26 18:00:00,106.0,-48.1,89.3,-48.01,92.2,-47.96,71.7,-48.31
2018-07-26 19:00:00,112.6,-48.18,92.9,-48.09,91.2,-48.0,69.1,-48.33
2018-07-26 20:00:00,111.5,-48.2,86.5,-48.07,87.1,-48.0,65.6,-48.35
2018-07-26 21:00:00,121.1,-48.23,92.2,-48.07,88.8,-47.98,70.2,-48.32
2018-07-26 22:00:00,144.1,-48.31,103.7,-48.08,94.3,-47.94,76.6,-48.26
2018-07-26 23:00:00,184.2,-48.44,119.1,-48.1,106.2,-47.94,85.8,-48.19
2018-07-27 00:00:00,231.2,-48.61,137.4,-48.13,122.0,-47.94,97.9,-48.11
2018-07-27 01:00:00,190.3,-48.44,129.8,-48.09,114.4,-47.85,92.1,-48.12
2018-07-27 02:00:00,187.2,-48.41,150.9,-48.18,124.5,-47.85,107.5,-48.18
2018-07-27 03:00:00,194.8,-48.44,195.7,-48.35,151.7,-47.97,149.0,-48.34
2018-07-27 04:00:00,191.4,-48.42,173.4,-48.28,162.7,-48.04,187.9,-48.5
2018-07-27 05:00:00,166.4,-48.36,145.8,-48.21,140.1,-48.07,171.4,-48.55
2018-07-27 06:00:00,159.9,-48.33,123.5,-48.12,121.0,-48.01,137.6,-48.4
2018-07-27 07:00:00,176.3,-48.39,127.7,-48.12,126.7,-48.0,135.3,-48.36
2018-07-27 08:00:00,174.4,-48.37,138.7,-48.15,130.1,-47.97,137.6,-48.35
2018-07-27 09:00:00,154.2,-48.31,135.8,-48.18,116.6,-47.98,117.3,-48.36
2018-07-27 10:00:00,132.3,-48.23,114.6,-48.12,103.4,-47.98,93.7,-48.34
2018-07-27 11:00:00,121.9,-48.2,95.4,-48.06,98.0,-47.97,78.9,-48.34
2018-07-27 12:00:00,107.7,-48.16,90.1,-48.07,87.1,-47.98,62.9,-48.34
2018-07-27 13:00:00,84.5,-48.07,76.6,-48.03,71.1,-47.95,52.5,-48.3
2018-07-27 14:00:00,74.8,-48.03,68.7,-48.0,63.1,-47.94,45.3,-48.3
2018-07-27 15:00:00,71.2,-48.02,64.1,-47.98,58.0,-47.92,38.5,-48.31
2018-07-27 16:00:00,68.1,-48.0,54.7,-47.93,53.8,-47.88,32.2,-48.26
2018-07-27 17:00:00,63.2,-47.98,50.9,-47.91,47.5,-47.85,29.4,-48.23
2018-07-27 18:00:00,74.0,-48.02,52.6,-47.91,49.6,-47.85,30.2,-48.21
2018-07-27 19:00:00,86.8,-48.05,56.6,-47.89,48.4,-47.83,32.0,-48.12
2018-07-27 20:00:00,106.4,-48.12,83.4,-47.96,62.5,-47.82,49.5,-48.14
2018-07-27 21:00:00,135.0,-48.23,85.4,-47.96,67.2,-47.85,50.8,-48.08
2018-07-27 22:00:00,178.7,-48.39,82.4,-47.93,80.5,-47.88,63.3,-48.03
2018-07-27 23:00:00,152.4,-48.31,76.5,-47.94,77.6,-47.89,60.9,-48.11
2018-07-28 00:00:00,112.9,-48.18,60.2,-47.92,68.1,-47.91,48.9,-48.19
2018-07-28 01:00:00,105.3,-48.16,61.6,-47.94,64.9,-47.93,40.0,-48.23
2018-07-28 02:00:00,96.9,-48.14,61.6,-47.97,62.9,-47.95,37.2,-48.28
2018-07-28 03:00:00,109.7,-48.2,65.9,-47.98,67.3,-47.97,41.1,-48.3
2018-07-28 04:00:00,97.0,-48.11,57.0,-47.91,57.0,-47.87,35.9,-48.16
2018-07-28 05:00:00,70.8,-47.98,52.1,-47.89,45.1,-47.8,28.8,-48.11
2018-07-28 06:00:00,42.9,-47.81,27.5,-47.73,28.2,-47.68,17.4,-47.85
2018-07-28 07:00:00,26.7,-47.71,16.8,-47.66,17.2,-47.63,10.6,-47.72
2018-07-28 08:00:00,22.8,-47.7,16.9,-47.66,14.7,-47.63,9.7,-47.73
2018-07-28 09:00:00,20.1,-47.68,14.8,-47.65,12.9,-47.63,8.3,-47.71
2018-07-28 10:00:00,17.8,-47.67,11.7,-47.64,11.2,-47.62,6.8,-47.7
2018-07-28 11:00:00,17.7,-47.68,12.0,-47.65,11.5,-47.63,5.5,-47.74
2018-07-28 12:00:00,16.8,-47.67,10.0,-47.64,10.6,-47.63,4.2,-47.73
2018-07-28 13:00:00,14.6,-47.66,8.2,-47.63,9.3,-47.62,3.4,-47.72
2018-07-28 14:00:00,15.3,-47.67,9.2,-47.64,10.0,-47.63,3.6,-47.74
2018-07-28 15:00:00,17.2,-47.68,10.4,-47.65,11.0,-47.64,4.0,-47.76
2018-07-28 16:00:00,18.6,-47.69,10.3,-47.64,11.4,-47.63,4.2,-47.75
2018-07-28 17:00:00,19.7,-47.69,10.6,-47.64,11.9,-47.63,4.6,-47.75
2018-07-28 18:00:00,23.5,-47.71,12.6,-47.65,13.9,-47.64,5.7,-47.76
2018-07-28 19:00:00,30.5,-47.74,15.4,-47.66,17.9,-47.64,7.7,-47.79
2018-07-28 20:00:00,38.9,-47.78,19.5,-47.68,21.9,-47.65,10.2,-47.81
2018-07-28 21:00:00,46.5,-47.81,27.1,-47.71,24.7,-47.65,13.7,-47.8
2018-07-28 22:00:00,49.1,-47.82,28.6,-47.7,25.2,-47.64,15.6,-47.76
2018-07-28 23:00:00,56.1,-47.84,30.6,-47.7,27.2,-47.64,17.8,-47.74
2018-07-29 00:00:00,68.0,-47.9,33.1,-47.71,31.5,-47.65,18.9,-47.73
2018-07-29 01:00:00,73.2,-47.92,43.3,-47.77,33.5,-47.68,23.0,-47.75
2018-07-29 02:00:00,77.9,-47.96,47.5,-47.8,39.3,-47.72,28.1,-47.81
2018-07-29 03:00:00,76.9,-47.97,36.0,-47.76,38.7,-47.74,26.6,-47.83
2018-07-29 04:00:00,80.6,-47.99,40.0,-47.79,40.8,-47.77,31.4,-47.86
2018-07-29 05:00:00,70.5,-47.95,32.6,-47.77,38.2,-47.77,31.8,-47.84
2018-07-29 06:00:00,63.2,-47.92,35.4,-47.79,36.2,-47.77,32.1,-47.85
2018-07-29 07:00:00,59.3,-47.9,35.5,-47.79,35.3,-47.77,31.8,-47.85
2018-07-29 08:00:00,62.0,-47.91,39.5,-47.8,36.4,-47.77,33.4,-47.84
2018-07-29 09:00:00,59.2,-47.89,35.0,-47.78,33.4,-47.74,30.9,-47.82
2018-07-29 10:00:00,54.0,-47.87,36.5,-47.8,33.3,-47.76,30.9,-47.84
2018-07-29 11:00:00,53.2,-47.87,34.3,-47.78,32.8,-47.76,27.5,-47.84
2018-07-29 12:00:00,51.0,-47.86,29.9,-47.76,30.3,-47.73,24.9,-47.83
2018-07-29 13:00:00,44.4,-47.82,28.9,-47.74,26.0,-47.7,20.4,-47.8
2018-07-29 14:00:00,42.0,-47.81,30.8,-47.75,24.1,-47.69,17.3,-47.79
2018-07-29 15:00:00,43.1,-47.81,30.2,-47.74,24.2,-47.68,16.1,-47.77
2018-07-29 16:00:00,42.4,-47.8,29.1,-47.73,24.0,-47.68,15.7,-47.77
2018-07-29 17:00:00,43.9,-47.81,25.5,-47.71,24.9,-47.68,15.4,-47.78
2018-07-29 18:00:00,48.3,-47.83,25.5,-47.71,26.6,-47.67,16.1,-47.79
2018-07-29 19:00:00,53.2,-47.84,28.2,-47.71,28.0,-47.67,17.8,-47.78
2018-07-29 20:00:00,57.7,-47.86,31.5,-47.72,30.0,-47.67,19.5,-47.79
2018-07-29 21:00:00,56.4,-47.85,32.4,-47.72,29.8,-47.66,19.2,-47.78
2018-07-29 22:00:00,50.8,-47.82,30.7,-47.71,27.2,-47.65,18.3,-47.76
2018-07-29 23:00:00,66.8,-47.88,37.3,-47.72,32.9,-47.65,22.7,-47.73
2018-07-30 00:00:00,85.9,-47.97,43.8,-47.74,40.0,-47.66,27.5,-47.73
2018-07-30 01:00:00,95.3,-48.01,46.1,-47.75,43.8,-47.66,28.5,-47.73
2018-07-30 02:00:00,112.2,-48.08,59.6,-47.8,49.3,-47.68,35.6,-47.75
2018-07-30 03:00:00,132.3,-48.17,74.5,-47.87,57.5,-47.74,43.6,-47.79
2018-07-30 04:00:00,143.0,-48.22,75.5,-47.88,63.1,-47.78,45.6,-47.82
2018-07-30 05:00:00,152.9,-48.26,81.6,-47.9,68.3,-47.76,49.0,-47.83
2018-07-30 06:00:00,115.5,-48.11,69.9,-47.87,55.7,-47.73,38.4,-47.85
2018-07-30 07:00:00,92.4,-48.02,55.1,-47.82,45.3,-47.74,30.9,-47.86
2018-07-30 08:00:00,84.4,-47.99,64.9,-47.88,44.2,-47.73,32.4,-47.91
2018-07-30 09:00:00,64.6,-47.92,56.2,-47.86,37.0,-47.72,25.2,-47.93
2018-07-30 10:00:00,59.0,-47.9,49.9,-47.84,34.5,-47.73,22.3,-47.95
2018-07-30 11:00:00,42.2,-47.84,30.1,-47.77,27.4,-47.74,13.0,-47.99
2018-07-30 12:00:00,35.7,-47.82,26.8,-47.77,25.2,-47.75,11.9,-48.02
2018-07-30 13:00:00,37.1,-47.84,30.3,-47.8,27.0,-47.76,13.6,-48.08
2018-07-30 14:00:00,42.2,-47.87,32.5,-47.81,30.7,-47.78,15.3,-48.11
2018-07-30 15:00:00,39.7,-47.85,31.7,-47.81,28.8,-47.78,14.0,-48.11
2018-07-30 16:00:00,40.6,-47.86,31.6,-47.81,29.0,-47.77,12.9,-48.14
2018-07-30 17:00:00,42.5,-47.87,32.3,-47.82,29.5,-47.77,13.0,-48.14
2018-07-30 18:00:00,46.1,-47.9,35.0,-47.84,32.4,-47.79,14.1,-48.19
2018-07-30 19:00:00,56.8,-47.95,41.9,-47.87,37.5,-47.8,17.1,-48.23
2018-07-30 20:00:00,72.6,-48.01,52.8,-47.9,44.4,-47.81,21.8,-48.22
2018-07-30 21:00:00,83.1,-48.04,62.4,-47.92,48.3,-47.8,26.2,-48.18
2018-07-30 22:00:00,87.0,-48.05,62.0,-47.91,50.1,-47.79,27.7,-48.16
2018-07-30 23:00:00,83.6,-48.03,58.0,-47.88,48.8,-47.77,27.9,-48.12
2018-07-31 00:00:00,82.2,-48.03,57.2,-47.88,47.6,-47.78,28.7,-48.11
2018-07-31 01:00:00,90.2,-48.07,66.1,-47.93,51.8,-47.8,32.4,-48.17
2018-07-31 02:00:00,109.1,-48.14,89.0,-48.01,61.6,-47.8,41.8,-48.17
2018-07-31 03:00:00,111.8,-48.14,80.0,-47.96,64.1,-47.78,40.9,-48.11
2018-07-31 04:00:00,85.4,-48.0,51.4,-47.79,45.3,-47.71,33.3,-47.89
2018-07-31 05:00:00,82.3,-47.97,46.2,-47.75,42.5,-47.67,29.6,-47.81
2018-07-31 06:00:00,79.4,-47.96,54.9,-47.82,50.5,-47.71,32.8,-47.91
2018-07-31 07:00:00,63.4,-47.94,61.7,-47.93,65.0,-47.89,51.2,-48.14
2018-07-31 08:00:00,71.3,-48.01,80.3,-48.06,74.1,-47.98,90.1,-48.38
2018-07-31 09:00:00,59.4,-47.95,70.7,-48.01,57.8,-47.9,71.8,-48.27
2018-07-31 10:00:00,43.9,-47.85,51.0,-47.89,42.3,-47.81,52.2,-48.1
2018-07-31 11:00:00,26.4,-47.74,26.6,-47.74,25.5,-47.71,25.5,-47.86
2018-07-31 12:00:00,24.0,-47.73,22.5,-47.72,23.1,-47.7,19.7,-47.83
2018-07-31 13:00:00,26.4,-47.74,23.5,-47.73,24.0,-47.71,21.6,-47.85
2018-07-31 14:00:00,29.9,-47.76,24.7,-47.74,23.6,-47.71,18.2,-47.86
2018-07-31 15:00:00,29.6,-47.76,21.9,-47.72,19.2,-47.68,11.7,-47.82
2018-07-31 16:00:00,30.7,-47.76,21.1,-47.71,19.4,-47.68,9.3,-47.82
2018-07-31 17:00:00,30.7,-47.76,20.9,-47.71,20.0,-47.68,9.9,-47.82
2018-07-31 18:00:00,34.4,-47.77,21.8,-47.7,20.3,-47.66,11.3,-47.79
2018-07-31 19:00:00,42.7,-47.8,23.3,-47.69,24.5,-47.65,14.8,-47.78
2018-07-31 20:00:00,66.0,-47.88,35.2,-47.7,35.1,-47.64,24.4,-47.74
2018-07-31 21:00:00,89.1,-47.97,45.2,-47.71,45.3,-47.63,31.9,-47.72
2018-07-31 22:00:00,116.9,-48.08,62.3,-47.77,59.1,-47.62,40.6,-47.72
2018-07-31 23:00:00,146.7,-48.19,81.5,-47.83,76.0,-47.61,52.6,-47.72
2018-08-01 00:00:00,152.7,-48.21,92.4,-47.87,84.4,-47.64,62.2,-47.74
2018-08-01 01:00:00,162.6,-48.23,108.4,-47.91,99.6,-47.66,72.9,-47.72
2018-08-01 02:00:00,183.9,-48.3,133.4,-48.0,123.7,-47.69,87.6,-47.77
2018-08-01 03:00:00,191.4,-48.33,144.3,-48.04,136.9,-47.74,98.2,-47.8
2018-08-01 04:00:00,175.7,-48.28,152.7,-48.09,139.2,-47.8,112.8,-47.87
2018-08-01 05:00:00,172.0,-48.27,152.2,-48.1,133.8,-47.81,120.7,-47.91
2018-08-01 06:00:00,186.1,-48.32,149.7,-48.07,136.4,-47.81,120.0,-47.88
2018-08-01 07:00:00,185.6,-48.31,157.9,-48.09,141.5,-47.78,125.2,-47.89
2018-08-01 08:00:00,124.0,-48.1,110.3,-47.98,98.2,-47.76,88.2,-47.89
2018-08-01 09:00:00,68.4,-47.9,58.8,-47.82,53.8,-47.71,46.2,-47.83
2018-08-01 10:00:00,49.0,-47.82,40.6,-47.75,35.8,-47.68,30.1,-47.76
2018-08-01 11:00:00,50.5,-47.84,41.4,-47.78,34.6,-47.69,28.1,-47.8
2018-08-01 12:00:00,48.2,-47.84,40.5,-47.79,34.3,-47.71,27.8,-47.83
2018-08-01 13:00:00,42.1,-47.81,33.5,-47.77,30.0,-47.71,26.8,-47.83
2018-08-01 14:00:00,36.2,-47.78,29.0,-47.74,24.9,-47.7,21.5,-47.81
2018-08-01 15:00:00,32.7,-47.76,26.4,-47.73,22.2,-47.68,18.3,-47.8
2018-08-01 16:00:00,33.5,-47.76,26.4,-47.72,21.8,-47.67,15.4,-47.77
2018-08-01 17:00:00,32.4,-47.75,21.7,-47.69,19.9,-47.65,12.3,-47.72
2018-08-01 18:00:00,37.4,-47.77,22.1,-47.68,20.7,-47.64,12.2,-47.7
2018-08-01 19:00:00,47.5,-47.8,27.8,-47.69,24.7,-47.63,15.8,-47.69
2018-08-01 20:00:00,68.3,-47.88,34.9,-47.7,36.1,-47.62,21.9,-47.68
2018-08-01 21:00:00,81.2,-47.94,40.0,-47.71,42.9,-47.63,27.9,-47.69
2018-08-01 22:00:00,96.0,-47.99,48.4,-47.73,51.0,-47.62,33.5,-47.69
2018-08-01 23:00:00,107.0,-48.03,62.0,-47.78,63.0,-47.64,43.8,-47.7
2018-08-02 00:00:00,117.0,-48.07,81.2,-47.85,80.2,-47.69,54.3,-47.73
2018-08-02 01:00:00,131.9,-48.12,92.4,-47.89,91.0,-47.7,59.3,-47.73
2018-08-02 02:00:00,142.4,-48.16,85.4,-47.84,89.1,-47.68,60.9,-47.71
2018-08-02 03:00:00,151.4,-48.2,91.3,-47.86,93.1,-47.69,67.0,-47.72
2018-08-02 04:00:00,158.3,-48.23,100.9,-47.9,97.5,-47.69,71.5,-47.73
2018-08-02 05:00:00,169.0,-48.27,105.7,-47.91,97.4,-47.68,73.8,-47.72
2018-08-02 06:00:00,176.7,-48.3,116.0,-47.97,99.6,-47.68,76.3,-47.76
2018-08-02 07:00:00,133.0,-48.15,96.6,-47.95,87.5,-47.7,64.5,-47.81
2018-08-02 08:00:00,100.3,-48.03,81.4,-47.92,78.9,-47.76,58.7,-47.87
2018-08-02 09:00:00,78.1,-47.95,69.4,-47.89,71.3,-47.79,50.8,-47.92
2018-08-02 10:00:00,67.1,-47.91,62.7,-47.88,67.3,-47.81,47.5,-47.94
2018-08-02 11:00:00,57.3,-47.88,49.4,-47.84,54.1,-47.79,37.3,-47.95
2018-08-02 12:00:00,52.2,-47.87,42.7,-47.81,45.0,-47.77,31.0,-47.96
2018-08-02 13:00:00,50.1,-47.87,42.4,-47.82,41.8,-47.77,30.0,-48.01
2018-08-02 14:00:00,49.2,-47.87,42.4,-47.83,42.1,-47.78,28.6,-48.03
2018-08-02 15:00:00,49.8,-47.87,42.5,-47.83,43.6,-47.78,28.9,-48.04
2018-08-02 16:00:00,50.3,-47.88,42.6,-47.83,44.0,-47.78,28.9,-48.04
2018-08-02 17:00:00,53.5,-47.89,45.9,-47.84,46.6,-47.79,32.1,-48.05
2018-08-02 18:00:00,60.6,-47.92,51.6,-47.86,52.2,-47.8,38.4,-48.08
2018-08-02 19:00:00,84.9,-48.0,69.5,-47.9,60.1,-47.76,48.8,-48.03
2018-08-02 20:00:00,130.2,-48.17,93.5,-47.95,72.2,-47.73,50.6,-47.9
2018-08-02 21:00:00,142.5,-48.21,97.8,-47.95,81.0,-47.73,59.1,-47.88
2018-08-02 22:00:00,198.1,-48.39,127.3,-48.0,111.2,-47.7,87.2,-47.86
2018-08-02 23:00:00,272.7,-48.66,165.5,-48.11,137.7,-47.78,121.4,-47.9
2018-08-03 00:00:00,246.7,-48.66,141.6,-48.16,101.4,-47.99,101.9,-48.12
2018-08-03 01:00:00,224.6,-48.58,126.2,-48.13,94.4,-47.99,95.3,-48.18
2018-08-03 02:00:00,277.3,-48.76,150.6,-48.18,108.8,-48.02,107.0,-48.15
2018-08-03 03:00:00,372.2,-49.05,279.9,-48.63,134.5,-48.07,139.3,-48.09
2018-08-03 04:00:00,434.2,-49.23,457.8,-49.23,148.2,-48.09,171.5,-48.06
2018-08-03 05:00:00,428.2,-49.21,576.9,-49.63,142.8,-48.08,184.9,-48.17
2018-08-03 06:00:00,337.0,-48.94,443.6,-49.3,112.4,-48.01,152.3,-48.24
2018-08-03 07:00:00,280.8,-48.77,372.1,-49.11,96.8,-47.99,121.6,-48.29
2018-08-03 08:00:00,261.2,-48.71,369.1,-49.11,97.7,-47.99,131.4,-48.42
2018-08-03 09:00:00,190.6,-48.48,264.5,-48.76,82.6,-47.97,114.5,-48.46
2018-08-03 10:00:00,157.1,-48.34,182.2,-48.43,70.4,-47.91,84.9,-48.28
2018-08-03 11:00:00,134.5,-48.24,136.6,-48.24,63.6,-47.86,69.8,-48.21
2018-08-03 12:00:00,126.4,-48.2,122.0,-48.16,62.5,-47.83,63.7,-48.15
2018-08-03 13:00:00,125.6,-48.19,122.9,-48.15,64.2,-47.82,65.3,-48.13
2018-08-03 14:00:00,118.6,-48.15,117.7,-48.13,63.6,-47.8,62.6,-48.1
2018-08-03 15:00:00,110.7,-48.12,108.7,-48.1,65.6,-47.81,61.3,-48.15
2018-08-03 16:00:00,97.4,-48.07,94.4,-48.04,61.7,-47.81,58.5,-48.13
2018-08-03 17:00:00,85.6,-48.04,73.4,-47.99,54.4,-47.84,50.2,-48.18
2018-08-03 18:00:00,80.1,-48.03,64.7,-47.97,47.6,-47.85,42.0,-48.15
2018-08-03 19:00:00,93.0,-48.1,71.4,-48.01,52.2,-47.9,45.1,-48.21
2018-08-03 20:00:00,103.7,-48.15,82.0,-48.05,58.8,-47.93,52.2,-48.27
2018-08-03 21:00:00,124.5,-48.23,105.3,-48.13,67.7,-47.98,66.3,-48.33
2018-08-03 22:00:00,142.8,-48.29,104.7,-48.13,74.0,-47.99,75.2,-48.31
2018-08-03 23:00:00,159.2,-48.34,104.8,-48.11,80.2,-47.99,80.4,-48.23
2018-08-04 00:00:00,176.1,-48.4,126.0,-48.22,92.3,-48.03,92.9,-48.27
2018-08-04 01:00:00,157.0,-48.33,104.7,-48.12,82.8,-47.97,83.9,-48.18
2018-08-04 02:00:00,159.9,-48.33,103.0,-48.08,81.5,-47.93,84.7,-48.09
2018-08-04 03:00:00,164.8,-48.33,109.9,-48.07,84.4,-47.92,91.8,-48.08
2018-08-04 04:00:00,167.6,-48.32,115.1,-48.07,85.4,-47.92,94.4,-48.1
2018-08-04 05:00:00,161.1,-48.29,120.7,-48.09,83.7,-47.93,95.1,-48.14
2018-08-04 06:00:00,149.3,-48.22,126.0,-48.1,78.4,-47.93,89.7,-48.18
2018-08-04 07:00:00,130.3,-48.18,118.6,-48.1,71.2,-47.94,80.4,-48.26
2018-08-04 08:00:00,115.6,-48.15,109.1,-48.11,68.5,-47.94,79.0,-48.31
2018-08-04 09:00:00,108.3,-48.16,107.9,-48.15,68.8,-47.98,76.8,-48.43
2018-08-04 10:00:00,98.6,-48.15,105.4,-48.17,66.0,-48.0,70.8,-48.55
2018-08-04 11:00:00,95.5,-48.17,100.3,-48.19,66.3,-48.03,64.9,-48.64
2018-08-04 12:00:00,84.5,-48.15,90.1,-48.18,63.6,-48.04,58.4,-48.69
2018-08-04 13:00:00,81.4,-48.15,88.8,-48.18,64.1,-48.06,56.7,-48.75
2018-08-04 14:00:00,80.6,-48.15,88.4,-48.2,64.2,-48.06,56.5,-48.77
2018-08-04 15:00:00,79.4,-48.15,84.2,-48.19,62.6,-48.06,53.2,-48.79
2018-08-04 16:00:00,82.5,-48.17,86.4,-48.2,64.7,-48.08,54.8,-48.83
2018-08-04 17:00:00,90.1,-48.21,92.0,-48.23,68.8,-48.1,60.2,-48.9
2018-08-04 18:00:00,95.8,-48.24,92.7,-48.24,71.0,-48.11,57.8,-48.94
2018-08-04 19:00:00,121.9,-48.32,135.0,-48.38,75.1,-48.09,69.5,-48.87
2018-08-04 20:00:00,144.4,-48.4,235.1,-48.76,78.5,-48.08,94.2,-48.92
2018-08-04 21:00:00,146.3,-48.43,240.6,-48.8,80.6,-48.1,87.0,-49.0
2018-08-04 22:00:00,141.6,-48.43,236.8,-48.81,82.7,-48.13,67.2,-49.02
2018-08-04 23:00:00,152.4,-48.48,258.5,-48.9,89.5,-48.17,68.7,-49.05
2018-08-05 00:00:00,177.0,-48.57,304.4,-49.07,99.1,-48.2,74.7,-49.1
2018-08-05 01:00:00,216.3,-48.7,389.1,-49.32,109.8,-48.21,90.7,-49.06
2018-08-05 02:00:00,264.3,-48.86,483.9,-49.59,125.9,-48.25,125.2,-49.13
2018-08-05 03:00:00,324.7,-49.05,614.8,-49.93,145.5,-48.28,160.8,-49.17
2018-08-05 04:00:00,383.7,-49.22,729.6,-50.21,161.9,-48.29,198.6,-49.17
2018-08-05 05:00:00,449.7,-49.42,781.6,-50.33,182.7,-48.35,227.2,-49.28
2018-08-05 06:00:00,431.6,-49.37,756.0,-50.28,175.9,-48.33,217.3,-49.29
2018-08-05 07:00:00,368.9,-49.19,638.4,-50.01,154.9,-48.3,180.5,-49.28
2018-08-05 08:00:00,288.0,-48.95,484.5,-49.6,130.5,-48.26,143.2,-49.26
2018-08-05 09:00:00,190.1,-48.62,313.6,-49.09,100.5,-48.21,95.4,-49.21
2018-08-05 10:00:00,143.3,-48.44,217.4,-48.75,86.7,-48.18,74.2,-49.14
2018-08-05 11:00:00,125.7,-48.37,187.9,-48.63,78.5,-48.14,64.1,-49.05
2018-08-05 12:00:00,115.4,-48.32,169.6,-48.55,73.2,-48.12,59.9,-49.0
2018-08-05 13:00:00,111.1,-48.31,156.7,-48.51,72.0,-48.12,54.7,-49.03
2018-08-05 14:00:00,101.2,-48.27,138.8,-48.44,67.5,-48.1,46.9,-49.0
2018-08-05 15:00:00,97.0,-48.24,128.0,-48.39,64.8,-48.08,40.7,-48.91
2018-08-05 16:00:00,94.5,-48.23,125.0,-48.37,63.8,-48.07,38.3,-48.89
2018-08-05 17:00:00,98.8,-48.2,137.8,-48.38,63.0,-48.04,43.8,-48.81
2018-08-05 18:00:00,112.1,-48.22,166.1,-48.43,64.3,-48.03,51.2,-48.73
2018-08-05 19:00:00,124.6,-48.26,199.6,-48.56,67.8,-48.03,54.2,-48.71
2018-08-05 20:00:00,151.7,-48.36,251.4,-48.74,75.2,-48.04,63.0,-48.68
2018-08-05 21:00:00,198.1,-48.53,316.1,-48.95,90.5,-48.06,78.7,-48.68
2018-08-05 22:00:00,251.0,-48.72,322.2,-48.95,111.8,-48.1,95.4,-48.68
2018-08-05 23:00:00,265.6,-48.77,323.0,-48.92,119.8,-48.11,103.5,-48.64
2018-08-06 00:00:00,290.7,-48.85,436.3,-49.3,128.8,-48.14,117.0,-48.67
2018-08-06 01:00:00,351.5,-49.02,426.2,-49.2,149.6,-48.16,134.1,-48.56
2018-08-06 02:00:00,438.7,-49.27,426.6,-49.14,182.2,-48.2,157.2,-48.52
2018-08-06 03:00:00,493.1,-49.4,483.0,-49.26,205.4,-48.18,173.2,-48.45
2018-08-06 04:00:00,505.7,-49.4,360.6,-48.71,222.2,-48.06,186.6,-48.21
2018-08-06 05:00:00,467.2,-49.27,298.7,-48.47,215.3,-47.97,183.4,-48.13
2018-08-06 06:00:00,427.4,-49.22,409.4,-48.99,194.4,-48.08,163.5,-48.38
2018-08-06 07:00:00,419.2,-49.23,636.0,-49.77,184.7,-48.17,167.3,-48.51
2018-08-06 08:00:00,388.3,-49.14,606.9,-49.75,171.4,-48.18,158.0,-48.6
2018-08-06 09:00:00,296.8,-48.86,525.9,-49.57,138.2,-48.15,141.2,-48.69
2018-08-06 10:00:00,235.7,-48.66,357.2,-49.05,120.4,-48.12,119.8,-48.68
2018-08-06 11:00:00,167.3,-48.4,198.6,-48.47,95.5,-48.03,89.4,-48.56
2018-08-06 12:00:00,142.4,-48.3,123.0,-48.2,86.4,-47.98,65.4,-48.53
2018-08-06 13:00:00,120.0,-48.22,96.7,-48.1,79.4,-47.96,58.6,-48.53
2018-08-06 14:00:00,107.0,-48.17,91.6,-48.09,74.4,-47.94,53.2,-48.54
2018-08-06 15:00:00,95.2,-48.12,85.9,-48.07,68.4,-47.93,46.6,-48.47
2018-08-06 16:00:00,86.3,-48.09,80.5,-48.05,65.7,-47.93,46.8,-48.45
2018-08-06 17:00:00,84.7,-48.09,75.3,-48.04,67.3,-47.94,44.4,-48.47
2018-08-06 18:00:00,99.7,-48.15,81.6,-48.06,72.2,-47.96,49.5,-48.46
2018-08-06 19:00:00,139.4,-48.31,102.0,-48.13,88.8,-48.02,66.0,-48.51
2018-08-06 20:00:00,178.8,-48.45,126.9,-48.18,109.7,-48.02,85.4,-48.52
2018-08-06 21:00:00,231.6,-48.62,176.4,-48.32,137.7,-47.98,106.5,-48.48
2018-08-06 22:00:00,260.4,-48.71,194.8,-48.36,155.8,-47.97,136.4,-48.5
2018-08-06 23:00:00,269.6,-48.74,194.7,-48.34,149.4,-47.97,145.5,-48.43
2018-08-07 00:00:00,264.7,-48.75,182.3,-48.32,139.2,-47.99,143.8,-48.45
2018-08-07 01:00:00,272.8,-48.77,181.6,-48.32,143.7,-48.01,166.8,-48.47
2018-08-07 02:00:00,283.2,-48.8,185.1,-48.31,150.2,-48.03,172.7,-48.45
2018-08-07 03:00:00,276.8,-48.77,195.1,-48.33,161.5,-47.99,180.0,-48.49
2018-08-07 04:00:00,294.0,-48.82,215.5,-48.4,181.4,-48.01,199.7,-48.57
2018-08-07 05:00:00,318.4,-48.89,246.5,-48.49,201.3,-48.01,218.9,-48.61
2018-08-07 06:00:00,307.7,-48.86,254.0,-48.54,204.3,-48.03,198.8,-48.66
2018-08-07 07:00:00,287.9,-48.81,243.6,-48.53,193.0,-48.05,177.5,-48.61
2018-08-07 08:00:00,235.7,-48.66,199.2,-48.44,168.3,-48.06,141.0,-48.68
2018-08-07 09:00:00,157.0,-48.4,138.9,-48.28,119.2,-48.05,99.1,-48.64
2018-08-07 10:00:00,122.9,-48.29,111.6,-48.21,98.7,-48.05,76.7,-48.65
2018-08-07 11:00:00,111.5,-48.26,100.0,-48.18,93.4,-48.06,71.4,-48.66
2018-08-07 12:00:00,106.6,-48.24,101.4,-48.21,89.0,-48.06,65.1,-48.64
2018-08-07 13:00:00,94.5,-48.2,89.7,-48.17,84.8,-48.08,58.0,-48.61
2018-08-07 14:00:00,85.6,-48.15,77.6,-48.1,74.5,-48.04,53.7,-48.53
2018-08-07 15:00:00,84.0,-48.13,76.1,-48.09,70.7,-48.03,51.0,-48.52
2018-08-07 16:00:00,81.9,-48.11,76.0,-48.08,69.8,-48.0,53.9,-48.48
2018-08-07 17:00:00,86.7,-48.12,73.7,-48.06,72.1,-47.99,51.5,-48.44
2018-08-07 18:00:00,93.6,-48.15,75.2,-48.05,75.0,-47.99,53.0,-48.43
2018-08-07 19:00:00,110.1,-48.2,86.0,-48.07,84.5,-47.99,63.1,-48.39
2018-08-07 20:00:00,134.6,-48.29,94.8,-48.08,95.0,-47.98,69.5,-48.4
2018-08-07 21:00:00,165.8,-48.45,140.2,-48.32,103.4,-48.04,79.7,-48.54
2018-08-07 22:00:00,151.4,-48.38,160.6,-48.39,115.7,-48.02,99.3,-48.66
2018-08-07 23:00:00,100.3,-48.24,93.7,-48.2,76.4,-48.06,64.9,-48.78
2018-08-08 00:00:00,112.1,-48.33,102.2,-48.28,83.6,-48.13,72.6,-48.9
2018-08-08 01:00:00,111.3,-48.33,92.6,-48.24,78.8,-48.11,56.7,-48.81
2018-08-08 02:00:00,103.2,-48.28,85.9,-48.21,73.4,-48.09,52.8,-48.73
2018-08-08 03:00:00,80.4,-48.13,68.6,-48.09,57.0,-47.97,45.7,-48.46
2018-08-08 04:00:00,70.6,-48.04,62.2,-48.01,49.2,-47.88,49.5,-48.26
2018-08-08 05:00:00,69.3,-48.01,73.9,-48.05,48.3,-47.85,65.0,-48.22
2018-08-08 06:00:00,80.4,-48.06,90.0,-48.12,63.8,-47.91,76.7,-48.28
2018-08-08 07:00:00,61.9,-47.94,71.8,-48.0,53.6,-47.83,60.9,-48.1
2018-08-08 08:00:00,46.7,-47.86,54.8,-47.91,44.4,-47.8,41.1,-47.98
2018-08-08 09:00:00,39.5,-47.84,40.9,-47.84,38.8,-47.79,31.0,-47.96
2018-08-08 10:00:00,29.6,-47.79,25.6,-47.77,27.6,-47.75,20.0,-47.91
2018-08-08 11:00:00,23.5,-47.75,19.8,-47.74,19.4,-47.71,18.1,-47.83
2018-08-08 12:00:00,22.9,-47.74,19.3,-47.73,16.5,-47.69,15.3,-47.79
2018-08-08 13:00:00,23.1,-47.75,21.2,-47.74,16.8,-47.7,14.5,-47.8
2018-08-08 14:00:00,23.5,-47.76,17.8,-47.73,17.5,-47.71,11.6,-47.83
2018-08-08 15:00:00,23.1,-47.75,17.0,-47.72,17.0,-47.7,11.1,-47.85
2018-08-08 16:00:00,25.7,-47.77,19.5,-47.74,19.5,-47.72,11.5,-47.87
2018-08-08 17:00:00,28.0,-47.78,19.2,-47.73,20.0,-47.71,10.6,-47.86
2018-08-08 18:00:00,35.6,-47.82,22.2,-47.75,24.3,-47.73,12.0,-47.93
2018-08-08 19:00:00,45.3,-47.87,26.0,-47.76,28.3,-47.74,13.9,-47.95
2018-08-08 20:00:00,60.0,-47.92,32.5,-47.77,34.6,-47.72,18.5,-47.91
2018-08-08 21:00:00,78.0,-47.98,44.9,-47.8,47.5,-47.72,29.3,-47.89
2018-08-08 22:00:00,88.6,-48.03,54.7,-47.84,59.4,-47.76,35.6,-47.93
2018-08-08 23:00:00,93.6,-48.05,54.8,-47.84,62.0,-47.77,38.4,-47.92
2018-08-09 00:00:00,116.3,-48.14,69.3,-47.88,72.8,-47.76,46.2,-47.93
2018-08-09 01:00:00,113.4,-48.13,71.9,-47.91,77.2,-47.79,47.9,-47.96
2018-08-09 02:00:00,109.0,-48.11,78.5,-47.93,87.4,-47.83,57.4,-47.97
2018-08-09 03:00:00,113.9,-48.13,98.5,-48.01,102.3,-47.88,71.5,-48.06
2018-08-09 04:00:00,124.3,-48.2,104.6,-48.07,105.4,-47.95,103.2,-48.31
2018-08-09 05:00:00,123.2,-48.25,77.8,-48.04,84.1,-48.04,80.5,-48.45
2018-08-09 06:00:00,112.8,-48.22,71.0,-48.03,70.9,-48.0,60.4,-48.42
2018-08-09 07:00:00,121.1,-48.25,69.4,-48.01,65.2,-47.98,49.6,-48.35
2018-08-09 08:00:00,129.8,-48.27,77.0,-48.03,61.8,-47.95,49.1,-48.27
2018-08-09 09:00:00,138.1,-48.3,75.8,-48.03,65.0,-47.97,52.4,-48.32
2018-08-09 10:00:00,110.9,-48.22,75.9,-48.07,60.6,-47.98,48.9,-48.41
2018-08-09 11:00:00,136.7,-48.34,105.2,-48.2,73.6,-48.04,65.0,-48.5
2018-08-09 12:00:00,126.0,-48.29,111.9,-48.22,70.7,-48.0,67.9,-48.47
2018-08-09 13:00:00,108.8,-48.2,102.0,-48.15,62.9,-47.95,66.4,-48.42
2018-08-09 14:00:00,121.6,-48.26,122.5,-48.23,72.1,-48.01,80.9,-48.48
2018-08-09 15:00:00,155.0,-48.38,155.0,-48.36,89.4,-48.09,97.9,-48.53
2018-08-09 16:00:00,142.1,-48.31,122.9,-48.21,76.8,-48.03,82.1,-48.44
2018-08-09 17:00:00,147.9,-48.33,173.3,-48.42,74.3,-48.01,80.9,-48.4
2018-08-09 18:00:00,171.3,-48.42,307.6,-48.92,82.3,-48.02,97.7,-48.42
2018-08-09 19:00:00,206.8,-48.53,309.3,-48.88,98.2,-48.04,116.8,-48.33
2018-08-09 20:00:00,289.3,-48.81,372.4,-49.04,125.8,-48.09,139.6,-48.26
2018-08-09 21:00:00,331.7,-48.91,277.7,-48.58,153.2,-47.99,153.1,-48.09
2018-08-09 22:00:00,250.7,-48.62,200.4,-48.32,147.4,-47.84,128.6,-48.14
2018-08-09 23:00:00,195.5,-48.4,154.5,-48.15,142.2,-47.84,100.5,-47.95
2018-08-10 00:00:00,159.6,-48.26,118.9,-48.0,127.4,-47.84,73.7,-47.84
2018-08-10 01:00:00,177.1,-48.31,117.2,-47.95,129.1,-47.77,76.8,-47.78
2018-08-10 02:00:00,201.2,-48.4,123.8,-47.97,144.3,-47.78,85.2,-47.79
2018-08-10 03:00:00,212.5,-48.47,111.5,-47.94,136.5,-47.79,93.0,-47.88
2018-08-10 04:00:00,222.9,-48.51,117.8,-47.97,132.6,-47.77,100.7,-47.92
2018-08-10 05:00:00,195.1,-48.41,106.4,-47.95,113.7,-47.77,89.4,-47.88
2018-08-10 06:00:00,151.7,-48.26,88.7,-47.93,89.1,-47.77,72.5,-47.89
2018-08-10 07:00:00,92.8,-48.05,64.2,-47.9,66.0,-47.8,53.3,-47.96
2018-08-10 08:00:00,51.7,-47.89,39.1,-47.83,39.3,-47.78,30.3,-47.97
2018-08-10 09:00:00,42.9,-47.87,30.0,-47.81,28.7,-47.77,17.4,-48.0
2018-08-10 10:00:00,57.0,-47.94,44.6,-47.87,35.0,-47.8,24.5,-48.05
2018-08-10 11:00:00,68.6,-48.0,47.9,-47.88,39.0,-47.8,22.3,-48.07
2018-08-10 12:00:00,61.4,-47.95,36.6,-47.82,33.6,-47.75,16.7,-47.97
2018-08-10 13:00:00,62.0,-47.95,38.4,-47.82,39.0,-47.76,20.9,-48.01
2018-08-10 14:00:00,60.4,-47.96,46.8,-47.88,49.2,-47.83,27.0,-48.1
2018-08-10 15:00:00,59.3,-47.99,46.9,-47.92,50.8,-47.9,31.7,-48.24
2018-08-10 16:00:00,72.4,-48.06,65.8,-48.01,64.4,-47.95,43.0,-48.34
2018-08-10 17:00:00,84.1,-48.1,79.4,-48.06,65.6,-47.93,59.1,-48.4
2018-08-10 18:00:00,96.8,-48.16,79.0,-48.08,58.1,-47.96,59.4,-48.33
2018-08-10 19:00:00,105.0,-48.16,99.0,-48.12,58.1,-47.92,65.3,-48.19
2018-08-10 20:00:00,103.9,-48.14,99.4,-48.09,56.1,-47.89,63.5,-48.09
2018-08-10 21:00:00,131.4,-48.24,114.3,-48.12,68.3,-47.9,80.5,-48.08
2018-08-10 22:00:00,165.2,-48.36,132.8,-48.16,82.6,-47.9,98.5,-48.06
2018-08-10 23:00:00,230.6,-48.58,165.4,-48.21,109.7,-47.89,127.5,-47.97
2018-08-11 00:00:00,301.5,-48.78,203.5,-48.24,145.0,-47.84,168.4,-47.88
2018-08-11 01:00:00,314.0,-48.81,223.9,-48.32,164.6,-47.84,201.1,-48.03
2018-08-11 02:00:00,311.0,-48.82,215.5,-48.31,170.2,-47.9,211.0,-48.09
2018-08-11 03:00:00,325.6,-48.85,239.2,-48.35,181.8,-47.88,233.0,-48.06
2018-08-11 04:00:00,348.7,-48.9,282.7,-48.49,210.5,-47.87,249.8,-48.14
2018-08-11 05:00:00,348.4,-48.9,289.3,-48.52,214.0,-47.86,237.2,-48.13
2018-08-11 06:00:00,274.9,-48.68,231.2,-48.4,175.3,-47.87,178.3,-48.1
2018-08-11 07:00:00,229.8,-48.53,205.4,-48.35,155.8,-47.83,154.6,-48.1
2018-08-11 08:00:00,153.7,-48.28,129.9,-48.14,106.1,-47.82,91.1,-48.03
2018-08-11 09:00:00,90.7,-48.06,76.2,-47.98,62.4,-47.8,57.7,-48.01
2018-08-11 10:00:00,76.5,-48.02,63.1,-47.94,51.5,-47.8,45.7,-48.01
2018-08-11 11:00:00,61.9,-47.96,56.7,-47.94,42.9,-47.79,36.0,-47.99
2018-08-11 12:00:00,49.0,-47.9,46.6,-47.9,36.5,-47.79,29.7,-47.99
2018-08-11 13:00:00,48.2,-47.91,47.5,-47.91,36.8,-47.81,31.6,-48.04
2018-08-11 14:00:00,52.1,-47.95,49.0,-47.94,40.0,-47.85,32.5,-48.15
2018-08-11 15:00:00,48.8,-47.93,44.9,-47.92,36.4,-47.84,26.8,-48.14
2018-08-11 16:00:00,47.1,-47.92,39.1,-47.88,32.2,-47.81,20.4,-48.11
2018-08-11 17:00:00,56.9,-47.96,45.8,-47.9,36.4,-47.82,22.5,-48.11
2018-08-11 18:00:00,84.5,-48.08,68.1,-47.99,50.3,-47.85,35.7,-48.14
2018-08-11 19:00:00,110.0,-48.18,69.7,-47.97,55.9,-47.87,41.0,-48.08
2018-08-11 20:00:00,139.3,-48.3,71.4,-47.96,66.0,-47.91,49.5,-48.06
2018-08-11 21:00:00,162.0,-48.39,79.7,-48.0,78.5,-47.95,61.0,-48.1
2018-08-11 22:00:00,176.1,-48.46,80.9,-48.01,86.5,-47.99,71.5,-48.15
2018-08-11 23:00:00,166.0,-48.43,70.1,-48.0,86.4,-48.01,68.9,-48.24
2018-08-12 00:00:00,167.0,-48.46,81.2,-48.06,88.5,-48.04,68.7,-48.32
2018-08-12 01:00:00,169.8,-48.48,85.6,-48.09,89.6,-48.06,67.2,-48.35
2018-08-12 02:00:00,169.5,-48.49,95.5,-48.14,90.6,-48.07,64.6,-48.4
2018-08-12 03:00:00,185.4,-48.55,97.5,-48.14,97.8,-48.1,70.3,-48.44
2018-08-12 04:00:00,178.6,-48.52,106.5,-48.18,99.2,-48.09,74.6,-48.45
2018-08-12 05:00:00,132.5,-48.32,106.8,-48.17,81.1,-47.96,57.7,-48.38
2018-08-12 06:00:00,116.6,-48.23,80.7,-48.04,66.2,-47.89,41.5,-48.23
2018-08-12 07:00:00,109.5,-48.17,74.8,-47.98,60.0,-47.82,38.3,-48.11
2018-08-12 08:00:00,81.8,-48.05,59.0,-47.92,45.5,-47.79,28.1,-48.03
2018-08-12 09:00:00,62.2,-47.98,41.6,-47.86,36.6,-47.8,22.0,-48.04
2018-08-12 10:00:00,80.1,-48.09,67.1,-48.02,50.6,-47.9,35.4,-48.23
2018-08-12 11:00:00,79.2,-48.12,69.4,-48.06,54.7,-47.94,37.5,-48.33
2018-08-12 12:00:00,73.4,-48.08,58.6,-48.01,49.8,-47.92,33.2,-48.3
2018-08-12 13:00:00,77.4,-48.09,73.9,-48.07,48.9,-47.9,40.9,-48.27
2018-08-12 14:00:00,66.1,-48.03,64.0,-48.02,43.4,-47.88,38.5,-48.27
2018-08-12 15:00:00,60.8,-47.99,62.4,-48.0,38.6,-47.83,33.5,-48.18
2018-08-12 16:00:00,73.2,-48.04,71.8,-48.04,44.4,-47.85,39.9,-48.21
2018-08-12 17:00:00,84.4,-48.13,83.4,-48.13,56.4,-47.95,48.5,-48.34
2018-08-12 18:00:00,109.5,-48.29,104.1,-48.26,79.7,-48.09,65.6,-48.52
2018-08-12 19:00:00,128.5,-48.38,118.5,-48.33,91.7,-48.13,78.9,-48.57
2018-08-12 20:00:00,113.9,-48.27,95.8,-48.19,76.0,-48.0,64.3,-48.4
2018-08-12 21:00:00,113.0,-48.26,90.6,-48.15,73.6,-47.98,60.8,-48.33
2018-08-12 22:00:00,155.0,-48.45,114.7,-48.24,96.3,-48.08,78.3,-48.42
2018-08-12 23:00:00,173.6,-48.52,132.5,-48.31,108.1,-48.11,92.5,-48.47
2018-08-13 00:00:00,207.8,-48.64,157.1,-48.37,124.9,-48.1,107.3,-48.47
2018-08-13 01:00:00,209.4,-48.63,169.5,-48.39,129.3,-48.04,108.2,-48.45
2018-08-13 02:00:00,177.0,-48.49,138.7,-48.27,109.8,-47.96,85.2,-48.38
2018-08-13 03:00:00,186.8,-48.49,136.4,-48.23,117.0,-47.92,92.0,-48.32
2018-08-13 04:00:00,144.4,-48.32,120.1,-48.17,104.2,-47.93,84.1,-48.36
2018-08-13 05:00:00,132.6,-48.29,124.6,-48.2,115.7,-48.03,86.5,-48.45
2018-08-13 06:00:00,130.4,-48.3,123.7,-48.24,120.8,-48.09,96.6,-48.61
2018-08-13 07:00:00,134.5,-48.33,139.5,-48.32,126.6,-48.13,126.2,-48.77
2018-08-13 08:00:00,145.5,-48.39,157.3,-48.42,127.6,-48.16,142.2,-48.86
2018-08-13 09:00:00,137.4,-48.4,147.2,-48.42,111.0,-48.17,119.7,-48.92
2018-08-13 10:00:00,131.9,-48.41,125.6,-48.38,96.2,-48.16,92.2,-48.88
2018-08-13 11:00:00,123.6,-48.35,124.9,-48.35,81.9,-48.11,74.8,-48.69
2018-08-13 12:00:00,136.9,-48.41,134.5,-48.4,90.2,-48.13,80.6,-48.75
2018-08-13 13:00:00,90.7,-48.23,85.4,-48.23,68.2,-48.08,51.9,-48.76
2018-08-13 14:00:00,69.7,-48.14,66.9,-48.15,55.4,-48.04,37.7,-48.71
2018-08-13 15:00:00,72.5,-48.16,70.1,-48.18,57.3,-48.06,40.6,-48.76
2018-08-13 16:00:00,81.8,-48.21,74.6,-48.2,62.2,-48.07,45.8,-48.78
2018-08-13 17:00:00,91.4,-48.24,80.9,-48.21,67.0,-48.08,50.5,-48.76
2018-08-13 18:00:00,103.5,-48.31,97.6,-48.28,74.5,-48.13,56.0,-48.79
2018-08-13 19:00:00,116.7,-48.29,105.6,-48.23,78.9,-48.09,73.1,-48.67
2018-08-13 20:00:00,107.2,-48.2,91.9,-48.12,72.0,-48.03,76.4,-48.46
2018-08-13 21:00:00,119.4,-48.23,110.9,-48.17,74.5,-48.02,82.5,-48.42
2018-08-13 22:00:00,118.6,-48.25,113.1,-48.21,73.2,-48.03,78.4,-48.5
2018-08-13 23:00:00,131.9,-48.33,119.2,-48.26,78.7,-48.06,80.5,-48.64
2018-08-14 00:00:00,143.6,-48.4,132.4,-48.32,84.3,-48.09,85.8,-48.71
2018-08-14 01:00:00,176.3,-48.53,170.5,-48.46,100.5,-48.12,113.6,-48.85
2018-08-14 02:00:00,219.8,-48.7,220.3,-48.66,121.3,-48.15,137.6,-48.9
2018-08-14 03:00:00,224.3,-48.74,205.2,-48.63,126.6,-48.18,134.6,-48.94
2018-08-14 04:00:00,232.1,-48.79,194.8,-48.61,136.9,-48.22,139.2,-49.04
2018-08-14 05:00:00,255.3,-48.88,218.3,-48.69,166.6,-48.26,177.3,-49.16
2018-08-14 06:00:00,242.6,-48.83,256.4,-48.85,183.5,-48.31,218.2,-49.28
2018-08-14 07:00:00,188.7,-48.66,214.4,-48.77,151.2,-48.31,167.9,-49.28
2018-08-14 08:00:00,143.3,-48.49,178.6,-48.67,122.9,-48.27,141.3,-49.25
2018-08-14 09:00:00,109.7,-48.37,134.4,-48.51,99.0,-48.25,102.6,-49.17
2018-08-14 10:00:00,103.6,-48.34,129.2,-48.48,93.7,-48.24,101.0,-49.15
2018-08-14 11:00:00,79.7,-48.19,102.9,-48.33,69.9,-48.1,74.1,-48.89
2018-08-14 12:00:00,73.7,-48.14,96.6,-48.28,63.9,-48.06,67.2,-48.78
2018-08-14 13:00:00,66.2,-48.1,84.0,-48.2,58.2,-48.03,55.6,-48.71
2018-08-14 14:00:00,67.3,-48.12,77.6,-48.17,63.1,-48.07,50.6,-48.75
2018-08-14 15:00:00,72.2,-48.14,81.0,-48.19,67.7,-48.09,54.3,-48.83
2018-08-14 16:00:00,71.6,-48.12,79.4,-48.17,63.4,-48.05,54.5,-48.75
2018-08-14 17:00:00,72.9,-48.12,78.8,-48.15,66.3,-48.04,52.4,-48.72
2018-08-14 18:00:00,70.1,-48.07,75.0,-48.1,61.8,-47.98,52.6,-48.57
2018-08-14 19:00:00,73.0,-48.06,78.9,-48.08,63.3,-47.95,57.9,-48.46
2018-08-14 20:00:00,73.2,-48.04,70.4,-48.01,60.3,-47.9,53.6,-48.36
2018-08-14 21:00:00,80.2,-48.07,74.9,-48.03,66.3,-47.93,57.4,-48.4
2018-08-14 22:00:00,86.5,-48.09,84.1,-48.06,73.0,-47.93,65.8,-48.42
2018-08-14 23:00:00,89.8,-48.12,86.3,-48.08,75.0,-47.95,64.8,-48.46
2018-08-15 00:00:00,102.0,-48.16,98.6,-48.12,85.1,-47.98,84.8,-48.51
2018-08-15 01:00:00,111.1,-48.2,107.9,-48.15,91.3,-47.98,96.5,-48.55
2018-08-15 02:00:00,109.9,-48.19,102.9,-48.13,89.2,-47.96,86.7,-48.51
2018-08-15 03:00:00,132.7,-48.28,107.8,-48.13,111.2,-48.0,70.6,-48.44
2018-08-15 04:00:00,135.8,-48.31,102.6,-48.12,115.6,-48.01,61.2,-48.45
2018-08-15 05:00:00,103.8,-48.19,81.0,-48.07,92.8,-48.0,54.1,-48.46
2018-08-15 06:00:00,90.4,-48.15,77.4,-48.08,83.4,-48.01,50.9,-48.48
2018-08-15 07:00:00,77.7,-48.1,67.5,-48.04,71.3,-47.99,48.2,-48.47
2018-08-15 08:00:00,68.6,-48.06,61.4,-48.03,63.7,-47.98,42.4,-48.45
2018-08-15 09:00:00,64.3,-48.05,57.9,-48.02,61.5,-47.98,38.8,-48.44
2018-08-15 10:00:00,60.2,-48.03,54.2,-48.01,58.6,-47.98,36.5,-48.44
2018-08-15 11:00:00,57.4,-48.01,51.2,-47.98,55.4,-47.96,35.5,-48.39
2018-08-15 12:00:00,54.0,-47.98,47.4,-47.95,50.7,-47.93,33.6,-48.32
2018-08-15 13:00:00,49.8,-47.95,44.4,-47.93,47.2,-47.9,31.9,-48.26
2018-08-15 14:00:00,48.7,-47.95,42.5,-47.92,45.4,-47.9,30.8,-48.27
2018-08-15 15:00:00,51.9,-47.96,45.4,-47.93,45.6,-47.9,31.2,-48.26
2018-08-15 16:00:00,53.9,-47.97,45.0,-47.93,45.2,-47.89,28.3,-48.27
2018-08-15 17:00:00,57.1,-47.98,43.8,-47.91,44.1,-47.87,25.1,-48.25
2018-08-15 18:00:00,64.0,-48.0,45.4,-47.91,44.9,-47.86,24.7,-48.23
2018-08-15 19:00:00,72.9,-48.04,50.4,-47.92,48.3,-47.86,26.4,-48.23
2018-08-15 20:00:00,84.0,-48.08,54.7,-47.92,52.6,-47.85,29.9,-48.21
2018-08-15 21:00:00,92.4,-48.11,59.3,-47.94,56.5,-47.84,32.3,-48.21
2018-08-15 22:00:00,92.7,-48.11,60.1,-47.94,57.0,-47.84,32.0,-48.21
2018-08-15 23:00:00,93.6,-48.12,59.5,-47.94,58.1,-47.85,33.2,-48.24
2018-08-16 00:00:00,102.1,-48.16,63.3,-47.95,60.9,-47.86,35.4,-48.23
2018-08-16 01:00:00,96.9,-48.14,62.1,-47.95,59.2,-47.86,34.5,-48.24
2018-08-16 02:00:00,74.5,-48.04,48.8,-47.91,49.1,-47.85,26.9,-48.21
2018-08-16 03:00:00,70.5,-48.03,45.8,-47.91,47.6,-47.86,26.1,-48.24
2018-08-16 04:00:00,75.0,-48.05,49.8,-47.92,48.7,-47.85,27.4,-48.22
2018-08-16 05:00:00,65.3,-48.01,46.0,-47.91,44.2,-47.85,24.2,-48.22
2018-08-16 06:00:00,66.3,-48.01,47.0,-47.91,45.6,-47.86,25.5,-48.23
2018-08-16 07:00:00,68.7,-48.02,47.1,-47.9,44.9,-47.84,24.8,-48.18
2018-08-16 08:00:00,79.4,-48.07,51.2,-47.92,49.8,-47.85,27.5,-48.2
2018-08-16 09:00:00,102.5,-48.15,65.0,-47.95,62.6,-47.84,39.1,-48.17
2018-08-16 10:00:00,112.1,-48.17,94.1,-48.05,85.9,-47.9,83.2,-48.31
2018-08-16 11:00:00,109.4,-48.25,100.1,-48.18,85.1,-48.03,91.6,-48.73
2018-08-16 12:00:00,113.5,-48.28,102.4,-48.2,86.6,-48.05,76.8,-48.75
2018-08-16 13:00:00,101.5,-48.23,90.8,-48.15,81.9,-48.04,59.5,-48.66
2018-08-16 14:00:00,87.6,-48.15,68.2,-48.04,68.1,-47.97,41.2,-48.47
2018-08-16 15:00:00,86.6,-48.14,59.4,-48.0,67.2,-47.95,40.8,-48.42
2018-08-16 16:00:00,87.5,-48.17,60.3,-48.03,67.2,-47.99,40.3,-48.5
2018-08-16 17:00:00,92.1,-48.17,60.0,-48.01,59.3,-47.92,36.6,-48.38
2018-08-16 18:00:00,109.9,-48.26,79.4,-48.1,68.5,-47.95,50.3,-48.48
2018-08-16 19:00:00,115.0,-48.25,84.4,-48.08,72.7,-47.93,53.1,-48.37
2018-08-16 20:00:00,136.8,-48.29,83.8,-48.01,82.9,-47.87,57.6,-48.18
2018-08-16 21:00:00,186.3,-48.42,120.6,-48.05,116.0,-47.83,91.5,-48.04
2018-08-16 22:00:00,234.6,-48.53,198.6,-48.27,158.0,-47.84,176.6,-48.12
2018-08-16 23:00:00,185.6,-48.4,162.7,-48.23,124.5,-47.88,157.6,-48.26
2018-08-17 00:00:00,182.9,-48.42,152.4,-48.21,114.3,-47.91,136.7,-48.25
2018-08-17 01:00:00,193.2,-48.47,139.2,-48.15,110.4,-47.91,128.7,-48.18
2018-08-17 02:00:00,215.3,-48.55,137.0,-48.12,114.4,-47.91,130.7,-48.13
2018-08-17 03:00:00,266.6,-48.69,199.5,-48.28,153.1,-47.87,183.1,-48.17
2018-08-17 04:00:00,325.7,-48.84,273.9,-48.49,209.1,-47.89,222.3,-48.27
2018-08-17 05:00:00,291.1,-48.75,259.0,-48.51,201.7,-47.92,195.0,-48.32
2018-08-17 06:00:00,232.2,-48.6,219.0,-48.46,165.3,-47.97,166.1,-48.39
2018-08-17 07:00:00,208.6,-48.53,205.2,-48.44,153.5,-47.98,157.3,-48.45
2018-08-17 08:00:00,135.0,-48.29,151.4,-48.35,109.2,-47.98,110.7,-48.5
2018-08-17 09:00:00,81.2,-48.11,103.4,-48.21,71.8,-47.98,74.7,-48.47
2018-08-17 10:00:00,62.1,-48.04,81.0,-48.13,55.2,-47.96,55.8,-48.45
2018-08-17 11:00:00,52.0,-48.0,64.4,-48.07,44.2,-47.93,46.3,-48.42
2018-08-17 12:00:00,47.4,-47.97,58.7,-48.03,40.2,-47.91,43.1,-48.38
2018-08-17 13:00:00,47.9,-47.97,56.9,-48.02,41.3,-47.91,39.4,-48.38
2018-08-17 14:00:00,49.5,-47.99,53.5,-48.0,45.1,-47.93,37.8,-48.39
2018-08-17 15:00:00,53.3,-48.03,51.8,-48.02,52.7,-47.99,35.4,-48.47
2018-08-17 16:00:00,52.0,-48.0,47.0,-47.98,48.8,-47.95,31.7,-48.37
2018-08-17 17:00:00,62.3,-48.03,50.1,-47.98,52.3,-47.94,36.4,-48.32
2018-08-17 18:00:00,65.6,-48.03,54.0,-47.96,50.8,-47.89,39.9,-48.27
2018-08-17 19:00:00,63.0,-48.04,53.3,-47.97,45.3,-47.89,35.8,-48.35
2018-08-17 20:00:00,67.8,-48.05,60.4,-48.0,50.7,-47.91,43.9,-48.38
2018-08-17 21:00:00,69.2,-48.04,64.3,-47.99,53.3,-47.89,45.0,-48.28
2018-08-17 22:00:00,84.0,-48.1,71.6,-48.01,64.1,-47.9,50.8,-48.31
2018-08-17 23:00:00,104.0,-48.17,74.5,-48.0,84.8,-47.91,47.1,-48.26
2018-08-18 00:00:00,107.7,-48.2,66.5,-47.99,91.9,-47.95,51.1,-48.3
2018-08-18 01:00:00,114.1,-48.23,68.1,-48.0,85.1,-47.95,57.4,-48.31
2018-08-18 02:00:00,122.1,-48.25,72.6,-48.0,82.3,-47.93,60.4,-48.25
2018-08-18 03:00:00,140.5,-48.31,82.2,-48.01,88.2,-47.9,63.5,-48.22
2018-08-18 04:00:00,139.9,-48.3,84.0,-48.02,87.5,-47.89,65.9,-48.19
2018-08-18 05:00:00,134.3,-48.29,84.6,-48.04,88.9,-47.93,66.4,-48.24
2018-08-18 06:00:00,131.7,-48.29,86.1,-48.06,86.7,-47.94,64.3,-48.28
2018-08-18 07:00:00,107.5,-48.22,77.7,-48.07,79.4,-47.99,56.4,-48.42
2018-08-18 08:00:00,78.7,-48.12,65.6,-48.06,68.2,-48.0,44.3,-48.46
2018-08-18 09:00:00,64.2,-48.08,54.0,-48.03,58.7,-48.0,32.0,-48.5
2018-08-18 10:00:00,59.5,-48.07,49.0,-48.02,53.6,-48.0,26.1,-48.54
2018-08-18 11:00:00,53.5,-48.05,46.9,-48.02,49.6,-47.99,22.2,-48.54
2018-08-18 12:00:00,52.4,-48.04,48.0,-48.02,51.0,-48.0,24.1,-48.53
2018-08-18 13:00:00,52.5,-48.04,48.7,-48.02,50.9,-48.0,26.2,-48.5
2018-08-18 14:00:00,52.5,-48.04,47.5,-48.02,50.4,-48.0,26.2,-48.51
2018-08-18 15:00:00,53.5,-48.05,49.5,-48.02,52.3,-48.01,28.8,-48.51
2018-08-18 16:00:00,59.0,-48.09,53.0,-48.06,54.5,-48.03,33.7,-48.61
2018-08-18 17:00:00,63.1,-48.1,54.6,-48.05,53.7,-48.0,35.3,-48.63
2018-08-18 18:00:00,79.5,-48.16,67.0,-48.08,69.4,-48.02,41.4,-48.61
2018-08-18 19:00:00,117.9,-48.29,78.2,-48.08,90.8,-48.02,54.3,-48.56
2018-08-18 20:00:00,140.3,-48.37,88.5,-48.11,99.6,-48.01,61.2,-48.55
2018-08-18 21:00:00,139.4,-48.38,89.8,-48.12,91.5,-48.0,53.8,-48.53
2018-08-18 22:00:00,135.1,-48.36,87.2,-48.12,85.8,-47.99,47.8,-48.52
2018-08-18 23:00:00,135.8,-48.35,88.0,-48.1,83.9,-47.96,48.1,-48.45
2018-08-19 00:00:00,142.3,-48.36,89.9,-48.08,84.5,-47.92,49.5,-48.37
2018-08-19 01:00:00,150.9,-48.39,94.5,-48.08,85.6,-47.9,50.8,-48.34
2018-08-19 02:00:00,147.2,-48.37,93.2,-48.09,79.3,-47.89,45.7,-48.32
2018-08-19 03:00:00,122.9,-48.28,80.7,-48.06,68.2,-47.89,38.2,-48.33
2018-08-19 04:00:00,95.6,-48.16,64.8,-48.0,54.0,-47.86,30.9,-48.24
2018-08-19 05:00:00,78.4,-48.09,54.9,-47.96,45.7,-47.85,25.1,-48.22
2018-08-19 06:00:00,65.1,-48.03,43.4,-47.92,39.6,-47.84,19.4,-48.2
2018-08-19 07:00:00,59.8,-48.01,38.5,-47.9,36.6,-47.84,15.5,-48.21
2018-08-19 08:00:00,54.1,-47.99,33.8,-47.88,34.3,-47.84,13.3,-48.21
2018-08-19 09:00:00,47.9,-47.95,31.5,-47.86,31.5,-47.83,13.6,-48.17
2018-08-19 10:00:00,45.7,-47.94,35.0,-47.88,32.8,-47.84,15.7,-48.17
2018-08-19 11:00:00,48.1,-47.96,38.9,-47.91,39.8,-47.88,18.9,-48.22
2018-08-19 12:00:00,51.4,-47.98,41.5,-47.93,45.1,-47.91,25.3,-48.26
2018-08-19 13:00:00,51.6,-47.97,44.0,-47.93,46.4,-47.9,31.5,-48.19
2018-08-19 14:00:00,46.9,-47.93,40.9,-47.9,41.9,-47.86,29.9,-48.12
2018-08-19 15:00:00,39.5,-47.9,35.6,-47.88,33.7,-47.84,30.4,-48.15
2018-08-19 16:00:00,40.4,-47.9,38.4,-47.88,32.2,-47.82,29.3,-48.11
2018-08-19 17:00:00,42.3,-47.9,41.1,-47.89,33.5,-47.82,28.4,-48.1
2018-08-19 18:00:00,48.2,-47.93,44.7,-47.9,35.1,-47.83,33.3,-48.1
2018-08-19 19:00:00,69.3,-48.0,62.5,-47.96,47.8,-47.83,52.3,-48.12
2018-08-19 20:00:00,81.8,-48.06,71.5,-47.99,55.2,-47.85,56.2,-48.14
2018-08-19 21:00:00,93.7,-48.11,84.8,-48.05,66.0,-47.88,73.3,-48.22
2018-08-19 22:00:00,103.7,-48.15,101.4,-48.12,75.9,-47.91,88.4,-48.27
2018-08-19 23:00:00,121.1,-48.23,113.7,-48.18,85.7,-47.95,102.1,-48.35
2018-08-20 00:00:00,147.1,-48.33,115.1,-48.16,92.3,-47.94,101.2,-48.26
2018-08-20 01:00:00,152.4,-48.35,108.2,-48.12,90.2,-47.92,101.7,-48.23
2018-08-20 02:00:00,167.1,-48.41,121.3,-48.16,98.1,-47.94,115.4,-48.26
2018-08-20 03:00:00,193.8,-48.5,138.6,-48.21,113.0,-47.97,134.1,-48.28
2018-08-20 04:00:00,205.0,-48.54,151.7,-48.26,122.9,-47.98,141.9,-48.37
2018-08-20 05:00:00,183.2,-48.48,151.0,-48.3,116.2,-48.01,141.9,-48.46
2018-08-20 06:00:00,154.5,-48.4,128.3,-48.26,99.7,-48.03,121.6,-48.45
2018-08-20 07:00:00,139.2,-48.35,122.4,-48.27,94.2,-48.04,115.7,-48.5
2018-08-20 08:00:00,115.1,-48.26,117.5,-48.26,86.3,-48.02,105.8,-48.5
2018-08-20 09:00:00,86.8,-48.14,103.5,-48.21,71.3,-47.99,84.9,-48.44
2018-08-20 10:00:00,76.7,-48.11,86.1,-48.16,67.8,-48.01,64.3,-48.5
2018-08-20 11:00:00,73.9,-48.11,79.7,-48.13,67.8,-48.02,63.2,-48.54
2018-08-20 12:00:00,78.2,-48.16,78.7,-48.15,74.6,-48.08,51.4,-48.7
2018-08-20 13:00:00,78.0,-48.18,73.5,-48.15,74.5,-48.09,44.9,-48.77
2018-08-20 14:00:00,74.9,-48.17,70.3,-48.15,72.8,-48.1,46.8,-48.79
2018-08-20 15:00:00,82.2,-48.21,79.0,-48.2,81.3,-48.14,56.9,-48.86
2018-08-20 16:00:00,93.5,-48.26,92.4,-48.25,93.5,-48.19,68.7,-48.91
2018-08-20 17:00:00,99.8,-48.28,94.0,-48.24,90.6,-48.15,74.9,-48.89
2018-08-20 18:00:00,103.4,-48.27,99.3,-48.23,90.3,-48.11,81.5,-48.84
2018-08-20 19:00:00,106.2,-48.26,87.0,-48.14,76.0,-48.04,63.1,-48.7
2018-08-20 20:00:00,125.3,-48.34,88.8,-48.12,80.1,-48.04,61.7,-48.63
2018-08-20 21:00:00,143.2,-48.39,96.1,-48.12,89.5,-48.03,76.6,-48.61
2018-08-20 22:00:00,125.3,-48.33,88.8,-48.12,83.9,-48.03,67.4,-48.67
2018-08-20 23:00:00,125.5,-48.31,94.7,-48.13,84.5,-48.01,74.7,-48.64
2018-08-21 00:00:00,148.0,-48.39,113.9,-48.18,100.6,-48.02,94.6,-48.66
2018-08-21 01:00:00,151.5,-48.4,118.4,-48.2,106.8,-48.03,101.7,-48.71
2018-08-21 02:00:00,155.5,-48.41,123.1,-48.21,107.2,-48.02,107.5,-48.7
2018-08-21 03:00:00,151.4,-48.4,112.7,-48.17,98.4,-48.02,87.9,-48.61
2018-08-21 04:00:00,156.2,-48.42,127.4,-48.24,110.0,-48.04,107.6,-48.69
2018-08-21 05:00:00,147.8,-48.39,145.9,-48.32,117.6,-48.08,118.1,-48.77
2018-08-21 06:00:00,132.6,-48.34,129.7,-48.28,110.2,-48.08,99.4,-48.75
2018-08-21 07:00:00,121.6,-48.31,124.3,-48.28,106.2,-48.09,95.8,-48.8
2018-08-21 08:00:00,100.8,-48.24,98.2,-48.2,88.7,-48.07,68.7,-48.74
2018-08-21 09:00:00,82.1,-48.18,74.2,-48.13,72.7,-48.05,42.6,-48.69
2018-08-21 10:00:00,91.1,-48.23,76.0,-48.15,80.5,-48.09,44.7,-48.75
2018-08-21 11:00:00,103.9,-48.29,95.0,-48.24,86.3,-48.11,53.6,-48.76
2018-08-21 12:00:00,89.9,-48.23,81.1,-48.19,71.4,-48.09,43.2,-48.73
2018-08-21 13:00:00,74.9,-48.15,64.0,-48.09,60.1,-48.04,32.3,-48.62
2018-08-21 14:00:00,81.7,-48.17,69.6,-48.11,67.7,-48.06,42.9,-48.61
2018-08-21 15:00:00,83.6,-48.2,72.6,-48.14,73.2,-48.1,50.4,-48.67
2018-08-21 16:00:00,79.3,-48.17,66.7,-48.11,70.8,-48.08,47.9,-48.63
2018-08-21 17:00:00,87.4,-48.2,70.7,-48.12,73.0,-48.08,49.5,-48.62
2018-08-21 18:00:00,110.8,-48.29,89.7,-48.2,79.5,-48.09,56.2,-48.62
2018-08-21 19:00:00,123.2,-48.32,92.8,-48.17,82.4,-48.03,56.6,-48.52
2018-08-21 20:00:00,154.1,-48.42,103.7,-48.17,98.8,-48.0,64.4,-48.48
2018-08-21 21:00:00,171.8,-48.46,116.0,-48.18,119.1,-48.0,78.5,-48.47
2018-08-21 22:00:00,193.8,-48.54,135.3,-48.23,139.8,-48.02,93.0,-48.48
2018-08-21 23:00:00,219.0,-48.6,174.5,-48.34,170.3,-48.06,123.6,-48.48
2018-08-22 00:00:00,247.1,-48.68,226.9,-48.49,198.4,-48.1,175.7,-48.56
2018-08-22 01:00:00,258.6,-48.7,230.9,-48.48,202.6,-48.08,183.9,-48.55
2018-08-22 02:00:00,270.2,-48.73,224.8,-48.46,213.0,-48.05,162.3,-48.5
2018-08-22 03:00:00,220.3,-48.59,177.8,-48.36,183.6,-48.08,128.5,-48.51
2018-08-22 04:00:00,174.3,-48.47,137.1,-48.26,147.7,-48.08,101.9,-48.5
2018-08-22 05:00:00,162.5,-48.44,123.3,-48.23,138.1,-48.08,91.0,-48.48
2018-08-22 06:00:00,161.1,-48.45,121.9,-48.24,140.6,-48.1,84.2,-48.52
2018-08-22 07:00:00,127.7,-48.31,112.3,-48.21,133.2,-48.13,78.2,-48.51
2018-08-22 08:00:00,95.5,-48.17,100.6,-48.16,96.0,-48.06,77.2,-48.44
2018-08-22 09:00:00,76.6,-48.08,81.5,-48.08,65.4,-47.95,69.6,-48.39
2018-08-22 10:00:00,65.7,-48.03,64.8,-48.01,57.1,-47.92,50.0,-48.3
2018-08-22 11:00:00,64.6,-48.02,58.4,-47.98,60.4,-47.93,36.8,-48.24
2018-08-22 12:00:00,59.8,-48.01,50.9,-47.96,57.2,-47.93,29.3,-48.23
2018-08-22 13:00:00,57.0,-48.01,46.2,-47.95,54.2,-47.93,26.2,-48.26
2018-08-22 14:00:00,54.6,-48.01,41.0,-47.94,50.4,-47.93,26.9,-48.29
2018-08-22 15:00:00,56.6,-48.01,44.8,-47.95,52.5,-47.94,30.1,-48.31
2018-08-22 16:00:00,57.3,-48.02,49.6,-47.99,53.2,-47.95,37.5,-48.34
2018-08-22 17:00:00,57.0,-48.02,51.8,-47.99,52.3,-47.95,46.7,-48.32
2018-08-22 18:00:00,70.0,-48.06,62.6,-48.02,59.6,-47.94,55.6,-48.32
2018-08-22 19:00:00,105.5,-48.19,91.4,-48.09,82.2,-47.94,78.4,-48.32
2018-08-22 20:00:00,176.5,-48.41,135.0,-48.18,131.0,-47.9,101.9,-48.27
2018-08-22 21:00:00,191.8,-48.48,125.9,-48.13,137.8,-47.96,100.6,-48.21
2018-08-22 22:00:00,203.4,-48.53,130.1,-48.15,144.4,-47.99,105.4,-48.24
2018-08-22 23:00:00,223.4,-48.59,146.4,-48.19,155.6,-47.98,115.6,-48.23
2018-08-23 00:00:00,239.7,-48.65,154.0,-48.21,163.6,-47.98,118.6,-48.23
2018-08-23 01:00:00,224.5,-48.6,145.5,-48.21,157.1,-47.98,114.7,-48.28
2018-08-23 02:00:00,212.6,-48.59,139.1,-48.22,147.9,-48.01,109.6,-48.37
2018-08-23 03:00:00,208.3,-48.56,137.4,-48.19,137.9,-47.97,103.9,-48.27
2018-08-23 04:00:00,189.0,-48.49,120.1,-48.14,122.1,-47.94,86.9,-48.27
2018-08-23 05:00:00,154.7,-48.38,102.6,-48.11,102.2,-47.95,69.6,-48.26
2018-08-23 06:00:00,128.1,-48.29,94.8,-48.12,94.8,-48.0,66.0,-48.28
2018-08-23 07:00:00,101.7,-48.19,83.6,-48.1,87.9,-48.03,65.2,-48.3
2018-08-23 08:00:00,92.7,-48.17,83.2,-48.13,88.7,-48.08,67.7,-48.36
2018-08-23 09:00:00,114.3,-48.28,103.4,-48.23,101.9,-48.14,104.6,-48.58
2018-08-23 10:00:00,106.6,-48.26,97.2,-48.21,81.7,-48.09,79.8,-48.55
2018-08-23 11:00:00,107.9,-48.24,107.0,-48.23,74.9,-48.06,77.8,-48.49
2018-08-23 12:00:00,92.8,-48.17,99.0,-48.18,67.6,-48.02,71.3,-48.43
2018-08-23 13:00:00,78.8,-48.11,88.0,-48.16,59.5,-47.98,60.3,-48.37
2018-08-23 14:00:00,61.0,-48.06,69.3,-48.11,50.4,-47.96,49.5,-48.33
2018-08-23 15:00:00,58.6,-48.06,67.1,-48.12,49.3,-47.98,51.6,-48.39
2018-08-23 16:00:00,50.9,-48.0,53.7,-48.02,43.4,-47.94,42.3,-48.34
2018-08-23 17:00:00,52.2,-48.0,53.4,-48.01,47.0,-47.94,42.1,-48.32
2018-08-23 18:00:00,50.4,-47.99,52.7,-48.01,42.9,-47.92,41.2,-48.32
2018-08-23 19:00:00,51.2,-48.01,53.2,-48.01,40.4,-47.92,36.7,-48.36
2018-08-23 20:00:00,60.9,-48.03,60.0,-48.01,48.1,-47.91,42.7,-48.32
2018-08-23 21:00:00,62.9,-48.04,59.2,-48.02,48.5,-47.91,43.2,-48.32
2018-08-23 22:00:00,64.1,-48.05,53.6,-48.02,42.8,-47.91,41.2,-48.26
2018-08-23 23:00:00,70.0,-48.06,55.7,-48.01,44.3,-47.89,47.2,-48.19
2018-08-24 00:00:00,93.9,-48.16,74.3,-48.08,57.3,-47.91,62.0,-48.23
2018-08-24 01:00:00,106.0,-48.2,106.9,-48.21,68.1,-47.91,92.2,-48.32
2018-08-24 02:00:00,105.1,-48.18,129.0,-48.3,73.6,-47.91,111.8,-48.33
2018-08-24 03:00:00,110.4,-48.2,142.7,-48.35,76.9,-47.92,115.2,-48.32
2018-08-24 04:00:00,115.7,-48.22,147.1,-48.36,79.6,-47.92,127.4,-48.35
2018-08-24 05:00:00,120.2,-48.24,153.6,-48.39,88.9,-47.96,123.2,-48.36
2018-08-24 06:00:00,112.6,-48.21,149.1,-48.38,88.8,-47.98,123.7,-48.4
2018-08-24 07:00:00,90.5,-48.14,131.5,-48.34,74.7,-47.98,120.6,-48.49
2018-08-24 08:00:00,63.4,-48.05,102.2,-48.26,50.4,-47.94,78.1,-48.43
2018-08-24 09:00:00,43.1,-47.96,67.2,-48.1,32.8,-47.88,48.5,-48.32
2018-08-24 10:00:00,39.4,-47.94,63.1,-48.07,30.9,-47.87,47.0,-48.3
2018-08-24 11:00:00,40.6,-47.95,65.6,-48.09,32.6,-47.89,49.8,-48.34
2018-08-24 12:00:00,35.6,-47.92,56.1,-48.03,29.1,-47.87,42.7,-48.29
2018-08-24 13:00:00,31.1,-47.88,37.8,-47.92,26.6,-47.84,26.6,-48.16
2018-08-24 14:00:00,33.2,-47.9,37.6,-47.93,31.5,-47.87,26.4,-48.16
2018-08-24 15:00:00,29.5,-47.86,29.7,-47.86,26.7,-47.83,23.6,-48.05
2018-08-24 16:00:00,34.0,-47.88,32.6,-47.87,28.8,-47.82,30.3,-48.06
2018-08-24 17:00:00,35.4,-47.86,33.2,-47.85,28.4,-47.79,30.5,-47.97
2018-08-24 18:00:00,37.0,-47.86,36.7,-47.85,29.3,-47.78,32.2,-47.93
2018-08-24 19:00:00,43.4,-47.87,44.5,-47.87,33.0,-47.77,37.6,-47.88
2018-08-24 20:00:00,52.0,-47.92,57.8,-47.94,38.1,-47.79,50.6,-47.94
2018-08-24 21:00:00,62.4,-47.97,56.1,-47.94,38.9,-47.8,48.8,-47.93
2018-08-24 22:00:00,70.5,-48.01,55.5,-47.95,40.5,-47.81,54.9,-47.94
2018-08-24 23:00:00,78.2,-48.05,57.8,-47.97,43.5,-47.83,57.7,-47.96
2018-08-25 00:00:00,92.6,-48.11,70.4,-48.01,53.4,-47.83,67.8,-47.97
2018-08-25 01:00:00,102.2,-48.14,85.4,-48.06,59.9,-47.83,81.6,-48.01
2018-08-25 02:00:00,121.5,-48.22,107.6,-48.15,71.1,-47.85,102.4,-48.09
2018-08-25 03:00:00,139.6,-48.29,158.6,-48.36,90.5,-47.89,145.3,-48.24
2018-08-25 04:00:00,151.1,-48.34,165.0,-48.38,94.2,-47.9,153.3,-48.29
2018-08-25 05:00:00,158.9,-48.37,154.8,-48.35,95.0,-47.89,138.0,-48.25
2018-08-25 06:00:00,133.4,-48.29,131.7,-48.3,81.8,-47.9,120.2,-48.29
2018-08-25 07:00:00,119.5,-48.25,116.2,-48.27,73.5,-47.91,106.4,-48.29
2018-08-25 08:00:00,97.0,-48.17,96.3,-48.22,61.5,-47.91,87.3,-48.29
2018-08-25 09:00:00,62.6,-48.04,69.8,-48.12,38.7,-47.89,54.3,-48.22
2018-08-25 10:00:00,53.5,-48.0,62.2,-48.07,31.4,-47.86,40.1,-48.16
2018-08-25 11:00:00,46.0,-47.95,50.6,-48.0,28.1,-47.84,33.1,-48.12
2018-08-25 12:00:00,46.1,-47.95,46.4,-47.97,28.8,-47.84,29.0,-48.08
2018-08-25 13:00:00,43.5,-47.94,45.0,-47.96,27.2,-47.84,28.2,-48.08
2018-08-25 14:00:00,53.6,-47.98,52.1,-47.98,31.8,-47.85,33.1,-48.08
2018-08-25 15:00:00,57.0,-48.0,50.9,-47.97,32.3,-47.86,34.2,-48.08
2018-08-25 16:00:00,57.3,-47.99,46.5,-47.94,31.7,-47.85,32.5,-48.04
2018-08-25 17:00:00,63.2,-48.01,55.9,-47.98,34.2,-47.85,36.3,-48.04
2018-08-25 18:00:00,69.3,-48.03,55.9,-47.96,35.2,-47.84,36.0,-48.0
2018-08-25 19:00:00,114.9,-48.21,66.8,-47.95,49.7,-47.88,49.0,-47.95
2018-08-25 20:00:00,218.4,-48.57,102.5,-47.98,83.1,-47.93,81.5,-47.78
2018-08-25 21:00:00,323.2,-48.89,155.6,-48.05,128.2,-47.9,130.1,-47.62
2018-08-25 22:00:00,330.0,-48.88,181.9,-48.11,145.6,-47.81,161.9,-47.66
2018-08-25 23:00:00,378.7,-49.03,208.4,-48.16,166.3,-47.82,176.3,-47.63
2018-08-26 00:00:00,401.7,-49.09,220.8,-48.18,178.6,-47.79,174.7,-47.63
2018-08-26 01:00:00,469.1,-49.28,249.2,-48.23,208.0,-47.76,190.8,-47.62
2018-08-26 02:00:00,549.5,-49.52,288.9,-48.36,236.2,-47.84,203.6,-47.63
2018-08-26 03:00:00,614.4,-49.71,318.8,-48.5,256.2,-47.97,218.2,-47.7
2018-08-26 04:00:00,494.7,-49.43,243.1,-48.34,227.2,-47.99,189.1,-47.88
2018-08-26 05:00:00,527.5,-49.56,305.3,-48.65,231.4,-48.11,194.1,-48.02
2018-08-26 06:00:00,477.6,-49.44,354.5,-48.91,204.0,-48.18,181.0,-48.1
2018-08-26 07:00:00,240.7,-48.72,124.0,-48.21,119.9,-48.1,104.2,-48.25
2018-08-26 08:00:00,106.3,-48.22,69.9,-48.04,62.8,-47.96,50.9,-48.18
2018-08-26 09:00:00,76.7,-48.11,49.0,-47.97,46.7,-47.93,38.1,-48.15
2018-08-26 10:00:00,84.5,-48.16,53.3,-48.01,50.6,-47.97,37.8,-48.22
2018-08-26 11:00:00,88.6,-48.19,58.0,-48.04,53.3,-47.99,39.1,-48.27
2018-08-26 12:00:00,79.3,-48.13,52.1,-48.0,47.2,-47.95,36.7,-48.15
2018-08-26 13:00:00,81.2,-48.14,58.3,-48.04,52.8,-47.99,44.4,-48.15
2018-08-26 14:00:00,100.4,-48.28,77.0,-48.18,70.9,-48.11,62.2,-48.35
2018-08-26 15:00:00,90.1,-48.22,70.1,-48.12,61.5,-48.04,48.6,-48.37
2018-08-26 16:00:00,69.5,-48.07,44.0,-47.94,41.6,-47.88,23.7,-48.18
2018-08-26 17:00:00,79.6,-48.09,47.0,-47.92,45.5,-47.84,25.6,-48.12
2018-08-26 18:00:00,88.2,-48.12,47.6,-47.91,50.4,-47.84,27.4,-48.13
2018-08-26 19:00:00,98.8,-48.16,57.8,-47.94,63.2,-47.87,37.3,-48.19
2018-08-26 20:00:00,109.3,-48.21,80.7,-48.06,90.1,-47.98,52.5,-48.31
2018-08-26 21:00:00,108.2,-48.24,89.9,-48.14,97.9,-48.06,73.3,-48.49
2018-08-26 22:00:00,99.7,-48.23,82.2,-48.13,87.0,-48.04,55.1,-48.52
2018-08-26 23:00:00,107.0,-48.3,90.0,-48.2,93.5,-48.11,57.9,-48.75
2018-08-27 00:00:00,118.9,-48.4,103.3,-48.31,104.9,-48.21,55.5,-49.04
2018-08-27 01:00:00,126.8,-48.49,111.1,-48.41,118.2,-48.32,54.9,-49.32
2018-08-27 02:00:00,134.8,-48.56,117.9,-48.47,123.6,-48.37,61.1,-49.49
2018-08-27 03:00:00,128.8,-48.54,111.2,-48.45,116.7,-48.37,58.6,-49.53
2018-08-27 04:00:00,115.7,-48.48,104.1,-48.43,109.1,-48.36,53.8,-49.45
2018-08-27 05:00:00,118.5,-48.47,108.8,-48.41,112.7,-48.33,60.9,-49.32
2018-08-27 06:00:00,120.1,-48.44,117.8,-48.41,109.5,-48.28,85.8,-49.21
2018-08-27 07:00:00,86.5,-48.22,98.7,-48.27,76.5,-48.11,84.3,-48.83
2018-08-27 08:00:00,65.2,-48.09,78.6,-48.15,57.6,-48.0,67.2,-48.54
2018-08-27 09:00:00,54.0,-48.04,63.0,-48.08,50.3,-47.98,55.4,-48.48
2018-08-27 10:00:00,52.5,-48.03,58.7,-48.07,49.7,-47.98,49.5,-48.46
2018-08-27 11:00:00,52.9,-48.03,57.8,-48.06,51.1,-47.98,50.2,-48.44
2018-08-27 12:00:00,45.7,-47.97,52.9,-48.0,40.5,-47.91,46.4,-48.27
2018-08-27 13:00:00,42.7,-47.94,52.9,-48.0,35.2,-47.88,42.6,-48.22
2018-08-27 14:00:00,42.5,-47.94,50.2,-47.99,35.3,-47.88,39.5,-48.21
2018-08-27 15:00:00,44.4,-47.96,52.3,-48.01,36.4,-47.89,40.6,-48.26
2018-08-27 16:00:00,47.9,-47.97,54.4,-48.01,39.1,-47.89,43.9,-48.24
2018-08-27 17:00:00,57.1,-48.0,62.3,-48.02,45.8,-47.9,53.4,-48.24
2018-08-27 18:00:00,78.2,-48.08,84.1,-48.09,59.5,-47.91,66.4,-48.23
2018-08-27 19:00:00,116.5,-48.21,108.8,-48.13,81.9,-47.91,96.1,-48.22
2018-08-27 20:00:00,150.0,-48.33,135.4,-48.21,97.6,-47.92,128.2,-48.26
2018-08-27 21:00:00,124.3,-48.27,82.2,-48.04,63.7,-47.9,79.4,-48.13
2018-08-27 22:00:00,136.6,-48.3,86.7,-48.03,67.3,-47.89,85.5,-48.1
2018-08-27 23:00:00,181.1,-48.46,113.7,-48.09,88.5,-47.89,109.6,-48.08
2018-08-28 00:00:00,223.4,-48.6,144.0,-48.17,112.8,-47.9,140.8,-48.11
2018-08-28 01:00:00,193.9,-48.49,133.8,-48.14,103.7,-47.87,132.6,-48.1
2018-08-28 02:00:00,219.7,-48.58,164.3,-48.24,122.5,-47.91,169.0,-48.16
2018-08-28 03:00:00,268.7,-48.73,196.9,-48.3,143.1,-47.91,200.4,-48.1
2018-08-28 04:00:00,319.1,-48.88,221.6,-48.34,165.6,-47.92,225.6,-48.09
2018-08-28 05:00:00,321.3,-48.9,206.1,-48.31,164.8,-47.97,213.2,-48.07
2018-08-28 06:00:00,264.5,-48.74,170.2,-48.24,135.1,-48.0,175.6,-48.12
2018-08-28 07:00:00,154.0,-48.37,130.5,-48.2,87.8,-47.93,109.2,-48.19
2018-08-28 08:00:00,123.0,-48.27,101.8,-48.15,74.1,-47.93,81.0,-48.25
2018-08-28 09:00:00,106.3,-48.22,94.4,-48.15,67.2,-47.95,63.8,-48.27
2018-08-28 10:00:00,71.5,-48.08,68.3,-48.07,48.4,-47.92,39.3,-48.21
2018-08-28 11:00:00,58.0,-48.03,53.9,-48.01,42.1,-47.9,31.9,-48.2
2018-08-28 12:00:00,55.0,-48.01,51.4,-47.99,38.9,-47.89,29.1,-48.16
2018-08-28 13:00:00,52.3,-47.99,47.6,-47.97,36.4,-47.88,26.8,-48.14
2018-08-28 14:00:00,53.9,-48.0,45.0,-47.95,35.6,-47.88,26.2,-48.13
2018-08-28 15:00:00,54.9,-48.0,41.7,-47.93,34.3,-47.87,25.5,-48.1
2018-08-28 16:00:00,54.7,-47.99,36.8,-47.91,33.2,-47.87,24.2,-48.09
2018-08-28 17:00:00,52.6,-47.97,32.1,-47.87,30.2,-47.84,21.7,-48.01
2018-08-28 18:00:00,65.5,-48.03,34.8,-47.87,34.1,-47.85,25.0,-48.0
2018-08-28 19:00:00,89.6,-48.12,44.9,-47.89,42.0,-47.87,32.4,-47.95
2018-08-28 20:00:00,146.3,-48.34,63.1,-47.91,64.9,-47.9,52.5,-47.93
2018-08-28 21:00:00,186.8,-48.45,103.7,-47.98,89.5,-47.8,74.0,-47.85
2018-08-28 22:00:00,207.8,-48.52,124.6,-48.05,101.3,-47.77,79.1,-47.85
2018-08-28 23:00:00,239.8,-48.62,148.2,-48.13,120.9,-47.75,87.9,-47.88
[truncated: 1,320,047 more chars]
